# Supplementary material
Source: PubMed Central journal article supplement (PMC3535628)
Supplement: 1210909110_pnas.201210909SI.pdf [file 1210909110_pnas.201210909SI.pdf]

# Supporting Information

Leonard and Richards 10.1073/pnas.1210909110

## SI Materials and Methods

**fdfBLAST.** To our knowledge, there is no standardized automated method to compare genome datasets (i.e., predicted proteomes) for the purpose of identifying differentially distributed gene fusions. To fill this gap, we designed a bioinformatic analysis pipeline to identify differentially distributed gene fusions between whole-genome datasets. This approach is not an exhaustive one but allows the identification of a large number of candidate gene fusions. The five-step bioinformatics pipeline uses a series of Perl scripts available at <https://github.com/guyleonard/fdfBLAST>.

As illustrated in Fig. S1, step 1 performs serial all-against-all BLASTp comparisons of predicted proteome datasets. In step 2 all BLAST search hits at or above a specified e-value threshold are counted to identify differential hit patterns. In step 3 reciprocal BLAST searches are used to confirm differential distributed BLAST hits. The program allows the e-value threshold for step 3 to be adjusted so users can control how differential hits are sampled. For example, a user may want to adjust these e-value thresholds to compare closely related or distantly related species and to manage noise in the form of false-positive BLAST hits. Differential hit patterns are the target datasets (e.g., 1-to-2 or 3-to-4, and so forth); all other patterns are excluded (e.g., 1-to-1, 3-to-3, 1-to-0, 3-to-0, and so forth). The differential hit patterns identified in steps 1–3 theoretically encompass gene families that have diversified under a number of different evolutionary scenarios: (i) differential gene duplication, (ii) differential gene loss, (iii) differential tandem exon duplication, (iv) inconsistent recovery of homologs because of differing rates of sequence variation in the gene family, and (v) gene fusions. The remaining two steps of the *fdfBLAST* pipeline (described below) generate a series of images that are designed to allow users to curate the results and eliminate datasets consistent with scenarios 1–4 and identify gene fusions (scenario 5).

Step 4 (Fig. S1) involves multiple rank and sorting processes used to distinguish putative fused and unfused pairs. By using the hit-range information from each set of BLAST results, the position of each match can be compared with the query sequence's start (amino acid position zero), end (the number of the last amino acid), and middle (length divided by two). Hits then can be classified (sorted) as left of the middle, right of the middle, or spanning the middle based on the value of the hit's start and end position. Specifically, if the hit's end position is higher than middle, it is recorded as right-sided; if it is lower than the middle value, it is classified as left-sided. The process is repeated using the hit's start position.

Hits that have a mixed results, i.e., a left-sided start position and a right-sided end position, are potential full-length hits. Hits that span the middle and that have a length (defined by the user, currently fixed to 90%) similar to the query full length are excluded and are not shown on the graphical output, because they are likely to represent complete homologous genes and therefore are unlikely to be differentially distributed gene fusions. Shorter hits that span the middle are shown in the graphical output according to the ranking procedures described below.

Hits that produce consistent results (i.e., both start and end are classified as left or as right) are retained and shown in the graphical output. Note that the program is set up so that hits in which  $\leq 10\%$  of the region of similarity spans the middle are not classified as "middle" and are retained and displayed in the output figures.

The final set of split sequences then is ranked in reference to the query sequence in two additional ways. First, each is given a

percentage score based on the number of amino acid bases matched to the query sequence. Then each potential unfused ORF alignment is illustrated by a color: 80–100%, green; 70–80%, light blue; 60–70%, purple; 40–60%, dark red; and <40%, gray. This color scheme is reflected in the cartoons of the final gene-to-gene alignment (Fig. S1, step 4). Second, a ratio is calculated based on the remaining ORFs matched to the query sequence: The lengths of the matched ORFs (left and right matches separately) are ordered from shortest to longest, and a ratio score for each pair of the matched ORFs is calculated. The highest end value from the left match is divided by the lowest start value from the right side, providing a proxy for the distance of the two partial hits relative to the query sequence. A value of 1 suggests that the left and right matches are adjacent when aligned against the query sequence, and a value of 0.1 means that the left and right matches are relatively far apart when aligned against the query sequence. Overlapping hits are removed at an earlier stage in the pipeline and are not shown on the output figure. All combinations are output by *fdfBLAST* and organized into folders ranging (in incremental steps of 0.1) from 0.1–1.0 so the graphical results can be searched systematically.

These two rank-and-sort methods, although seemingly complex, make the data produced by *fdfBLAST* accessible for curation. Because gene-fusion events can be considered the product of the union of multiple domains, it is advantageous (at least programmatically) to categorize the location of matched split ORFs to the potentially "fused"-ORF state. This categorization helps with the manual curation and identification of candidate split ORFs. For example, if all the matched ORFs for one fused ORF are similar in length (and span the whole putative fused ORF), they can be identified as potential complete-gene-length homologs and can be discarded. Similarly, if all the matched ORFs appeared to be one-sided (i.e., match only one half of the putative fused ORF), the putative gene-fusion prediction is likely to be an artifact.

Step 5 (Fig. S1) involves comparison of the candidate sequences with the PFAM database. The sequences representing the fused ORF and the two best unfused ORFs from each set of candidate gene fusions are passed to a program to map conserved functional domains on to the alignment diagrams. The program HMMER (<http://hmmer.org>) (1) is used to search sequence databases of homologous protein sequences using profile hidden Markov models. The data output from HMMER then is displayed as an overlay on the alignment diagrams (domain overlays). We use this step to remove putative gene fusions that do not contain PFAM conserved domains. Although this step may remove a number of gene fusions of domains not represented in the PFAM database, we believe that this approach is important to remove noise created by more frequently occurring false-positive hits (i.e., differential matches for regions of low complexity).

**Pipeline for Preliminary Fusion Domain Phylogenetic Analysis.** The preliminary phylogenies were calculated from taxon sampling using a MySQL database ([www.mysql.com](http://www.mysql.com)) of predicted proteomes containing a diversity of opisthokont taxa available at the Department of Energy Joint Genome Institute, the National Center for Biotechnology (NCBI) GenBank database, and the Broad Institute (Table S1). For this analysis, we also made use of the *Blastocladia emersonii* genome assembly produced in our laboratory in collaboration with Suely Gomes (Universidade de São Paulo, São Paulo, Brazil). All sequence data are available in the form of unmasked and masked alignments (see below) (2). Each candidate sequence was compared against sequences in the

database using BLASTp (3), and the best-similarity hits from each species were extracted (using the e-value  $1e-10$  gathering threshold). These sequences were aligned using MUSCLE (4), conserved regions from this alignment were sampled using trimAL (5), and phylogenetic trees were constructed using FastTree (6) with the options SLOW and BIONJ and the default substitution model. Topology support was assessed using the SH-like aLRT branch support values.

All fusion gene component phylogenies were inspected manually to check the phylogeny for resolution. If inspection of tree and alignment suggested the domain phylogeny was unlikely to demonstrate useful levels of resolution in and around the fusion branches, no further analysis was conducted, and the dataset was not analyzed further. This process often required several rounds of manual alignment checks and reanalysis for confirmation. For all fusion gene domains we then performed a series of BLAST searches focusing on additional sampling from the GenBank nonredundant (nr) database and the GenBank EST database. Additional sequences were added to the alignments as required. This process was facilitated by using the sequence management for phylogeny programs REFGEN and TREENAMER (7). Each alignment then was edited manually and masked to remove gaps and ambiguous alignment positions using the alignment program SEAVIEW (2). All gene alignments and sequence data are available at [http://gna-phylo.nhm.ac.uk/content/leonard\\_and\\_richards\\_2012](http://gna-phylo.nhm.ac.uk/content/leonard_and_richards_2012).

In some cases, genes had large sections of the amino acid sequence missing relative to the alignment, most likely because of incomplete assembly or poor gene prediction (specifically intron/exon boundaries during automatic annotation of the genomes). When the presence of these putatively incomplete sequences did not alter the taxonomic representation significantly relative to the clade of fusion genes under investigation, incomplete sequences were excluded from the alignment. When putatively incomplete sequences were important for evolutionary analysis of the gene fusion, the sequence data were checked manually as described below.

For each domain alignment we identified the optimal model for phylogenetic analysis using MODELGENERATOR (8). For the models used, see Table S3. Then PHYML (9) analysis was used

to assess the tree topology using the model parameters identified using MODELGENERATOR. Statistical support was evaluated with 100 bootstrap replicates.

#### Checks of Gene-Fusion Genome Annotations in Taxa Branching Around Identified Gene Fusions.

For taxa with unfused genes or partial sequences that branch close to gene fusions in our domain phylogenies, we checked specifically for cases of misprediction of these genes in individual genome assemblies. Using publicly available genome browsers on the Broad Institute, NCBI, and Department of Energy Joint Genome Institute websites (which allow visual inspection of the genome assembly as tracks and display information about contigs, supercontigs/scaffolds, and their associated gene predictions), we identified genes up- and downstream from the location of the unfused gene. This step allowed us to identify the direction in which and the contig on which the gene occurs. If, for example, the two genes we are interested in occur on different contigs, are in opposite orientation, or are both flanked and separated by other genes, we can confirm that the two domains form separate, unfused genes. However, if two separate genes that branch close to the gene fusion on our phylogenetic analyses are next to each other on a genome contig and occur in the same direction, we suggest these genes have been misannotated as separate genes when they should be fused, and so we tentatively annotate this pair of genes as a gene fusion. These alterations can be found in [Dataset S1](#); genes confirmed as separate are marked with a red X in the [SI Appendix](#), and genes corrected to putative fusions are marked with green ticks in the [SI Appendix](#). We note that, lacking experimental transcription and proteomic data, these annotations are not definitive results; consequently, the relative rate of fission in this dataset may be underestimated, or the position of a gene fission marked on Fig. 2 may be misplaced.

To investigate further evidence in support of each gene fusion, we searched the GenBank nr EST database for sequences that verified that the candidate gene fusion is transcribed as a gene fusion. In 18 of the 63 gene fusions we could identify evidence that the gene fusion was transcribed as a gene pair (gene fusion) using EST data (Table S3).

- Eddy SR (2011) Accelerated profile HMM SEARCHES. *PLoS Comput Biol* 7(10):e1002195.
- Galtier N, Gouy M, Gautier C (1996) SEAVIEW and PHYLO\_WIN: Two graphic tools for sequence alignment and molecular phylogeny. *Comput Appl Biosci* 12(6):543–548.
- Altschul SF, et al. (1997) Gapped BLAST and PSI-BLAST: A new generation of protein database search programs. *Nucleic Acids Res* 25(17):3389–3402.
- Edgar RC (2004) MUSCLE: A multiple sequence alignment method with reduced time and space complexity. *BMC Bioinformatics* 5:113.
- Capella-Gutiérrez S, Silla-Martínez JM, Gabaldón T (2009) trimAL: A tool for automated alignment trimming in large-scale phylogenetic analyses. *Bioinformatics* 25(15):1972–1973.
- Price MN, Dehal PS, Arkin AP (2010) FastTree 2—approximately maximum-likelihood trees for large alignments. *PLoS ONE* 5(3):e9490.
- Leonard G, Stevens JR, Richards TA (2009) REFGEN and TREENAMER: Automated sequence data handling for phylogenetic analysis in the genomic era. *Evol Bioinform Online* 5:1–4.
- Keane TM, Creevey CJ, Pentony MM, Naughton TJ, McInerney JO (2006) Assessment of methods for amino acid matrix selection and their use on empirical data shows that ad hoc assumptions for choice of matrix are not justified. *BMC Evol Biol* 6:29.
- Guindon S, Gascuel O (2003) A simple, fast, and accurate algorithm to estimate large phylogenies by maximum likelihood. *Syst Biol* 52(5):696–704.

### Step 1 Automated Serial BLASTp Analysis

Genomes of interest are collated and then subjected to NCBI's local BLAST tools, "formatdb" and "blastall".

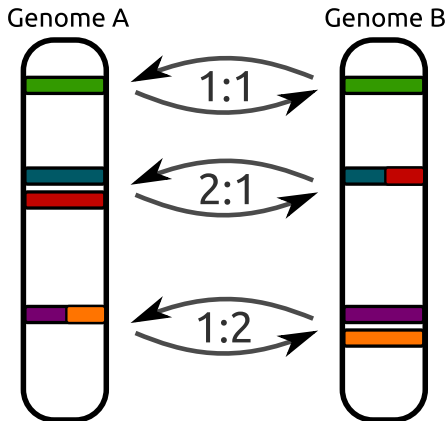

An all against all analysis is carried out, producing the standard BLAST output. For example; three genomes A, B and C are analysed in this way: A to A, A to B, A to C and B to B, B to A, B to C and C to C, C to A, C to B.

### Step 2 Comparative Hit Counts.

Genes with differential hit patterns are identified and passed on for further analyses by parsing the previous BLAST output using BioPerl.

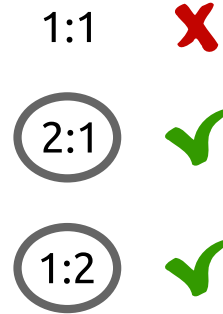

Program includes user adjustable e-value threshold so that multiple comparisons, with different cut-offs, can be performed.

### Step 3 Reciprocal Hit Matching

For each gene that has displayed evidence of differential hit patterns the reciprocal (e.g. A to B and B to A) analysis is queried to see if the differential pattern is preserved.

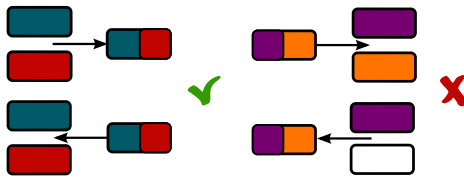

Genes with differential hits that display hits in both directions are selected.

If the second gene is not present at the selected e-value cut-off it is not considered a complete reciprocal hit.

### Step 5 Conserved Domains

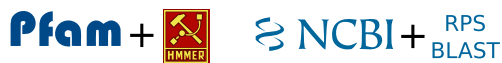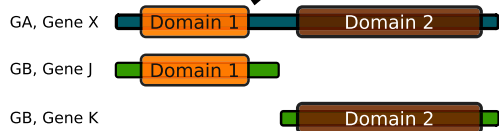

Candidate gene fusions are scanned against the Pfam and/or CDD databases using HMMER and RPS-BLAST respectively.

Conserved domains are then mapped on to the previous images in order to help manual confirmation, further narrowing the list of predicted putative gene fusion events.

### Step 4 Ranking and Sorting

**Sorting:** The subject ORFs are sorted by their 'location' compared to the query sequence's length; placing them left, right or spanning the middle. This helps remove 'complete full length' homologues (gene M) and identify potential split domains (genes J and K).

#### Query Sequence

Genome A, Gene X

#### Subject Sequences

Genome B, Gene I   
Genome B, Gene J   
Genome B, Gene K   
Genome B, Gene L   
Genome B, Gene M

Ranking: Each ORF is given a score based on the number of bases matched to the query sequence divided by the total length. These are coloured; green (80-100), blue (70-80), purple (60-70), red (40-60) and black (<40) based on %-identity in fdfBLAST's output.

The resulting images only include two candidate unfused ORFs, unlike the above image which represents the internal program data structure. Genes I, L and M are discarded.

Fig. S1. Cartoon illustrating the fdfBLAST analysis pipeline. The figure includes notes on the processes coded in the pipeline scripts. See *SI Materials and Methods* for more details. All pipeline scripts are available at <https://github.com/guyleonard/fdfBLAST>.





**Table S1. Genomes used for comparative fusions analyses and phylogeny**

| Genome sampled for domain phylogeny         | Genome sampled for 67-gene fungal phylogeny? |
|---------------------------------------------|----------------------------------------------|
| <i>Acremonium alcalophilum</i>              | Yes                                          |
| <i>Agaricus bisporus</i>                    | Yes                                          |
| <i>Allomyces macrogynus</i> ATCC 38327      | Yes                                          |
| <i>Alternaria brassicicola</i>              | Yes                                          |
| <i>Ashbya gossypii</i>                      | Yes                                          |
| <i>Aspergillus aculeatus</i>                | Yes                                          |
| <i>Aspergillus carbonarius</i>              | Yes                                          |
| <i>Aspergillus clavatus</i>                 | Yes                                          |
| <i>Aspergillus flavus</i>                   | Yes                                          |
| <i>Aspergillus fumigatus</i>                | Yes                                          |
| <i>Aspergillus nidulans</i>                 | Yes                                          |
| <i>Aspergillus niger</i>                    | Yes                                          |
| <i>Aspergillus oryzae</i>                   | Yes                                          |
| <i>Aspergillus terreus</i>                  | Yes                                          |
| <i>Auricularia delicata</i>                 | Yes                                          |
| <i>Batrachochytrium dendrobatidis</i>       | Yes                                          |
| <i>Baudoinia compniacensis</i>              | Yes                                          |
| <i>Bjerkandera adusta</i>                   | Yes                                          |
| <i>Blastocladiella emersonii</i>            | Yes                                          |
| <i>Blastomyces dermatitidis</i>             | Yes                                          |
| <i>Botrytis cinerea</i>                     | Yes                                          |
| <i>Branchiostoma floridae</i>               | Not included as not fungi                    |
| <i>Caenorhabditis elegans</i>               | Not included as not fungi                    |
| <i>Candida albicans</i> SC5314              | Yes                                          |
| <i>Candida caseinolytica</i>                | Yes                                          |
| <i>Candida glabrata</i>                     | Yes                                          |
| <i>Candida tenuis</i>                       | Yes                                          |
| <i>Capitella</i> sp. I                      | Not included as not fungi                    |
| <i>Capsaspora owczarzaki</i>                | Not included as not fungi                    |
| <i>Ceriporiopsis subvermisporea</i>         | Yes                                          |
| <i>Chaetomium globosum</i>                  | Yes                                          |
| <i>Ciona intestinalis</i>                   | Not included as not fungi                    |
| <i>Coccidioides immitis</i>                 | Yes                                          |
| <i>Coccidioides posadasii</i>               | Yes                                          |
| <i>Cochliobolus heterostrophus</i>          | Yes                                          |
| <i>Cochliobolus sativus</i>                 | Yes                                          |
| <i>Coniophora puteana</i>                   | Yes                                          |
| <i>Coprinus cinereus</i>                    | Yes                                          |
| <i>Cryphonectria parasitica</i>             | Yes                                          |
| <i>Cryptococcus neoformans</i>              | Yes                                          |
| <i>Dacryopinax</i> sp.                      | Yes                                          |
| <i>Danio rerio</i>                          | Not included as not fungi                    |
| <i>Daphnia pulex</i>                        | Not included as not fungi                    |
| <i>Debaryomyces hansenii</i>                | Yes                                          |
| <i>Dichomitus squalens</i>                  | Yes                                          |
| <i>Dothistroma septosporum</i>              | Yes                                          |
| <i>Drosophila melanogaster</i>              | Not included as not fungi                    |
| <i>Fomitiporia mediterranea</i>             | Yes                                          |
| <i>Fomitopsis pinicola</i>                  | Yes                                          |
| <i>Fusarium graminearum</i>                 | Yes                                          |
| <i>Fusarium oxysporum</i>                   | Yes                                          |
| <i>Fusarium verticillioides</i>             | Yes                                          |
| <i>Gallus gallus</i>                        | Not included as not fungi                    |
| <i>Ganoderma</i> sp.                        | Yes                                          |
| <i>Gloeophyllum trabeum</i>                 | Yes                                          |
| <i>Hansenula polymorpha</i> NCYC 495 leu1.1 | Yes                                          |
| <i>Helobdella robusta</i>                   | Not included as not fungi                    |
| <i>Heterobasidion annosum</i>               | Yes                                          |
| <i>Histoplasma capsulatum</i>               | Yes                                          |
| <i>Homo sapiens</i>                         | Not included as not fungi                    |
| <i>Hysterium pulicariae</i>                 | Yes                                          |
| <i>Laccaria bicolor</i>                     | Yes                                          |
| <i>Leptosphaeria maculans</i>               | Yes                                          |
| <i>Lipomyces starkeyi</i>                   | Yes                                          |

Table S1. Cont.

| Genome sampled for domain phylogeny       | Genome sampled for 67-gene fungal phylogeny?                                         |
|-------------------------------------------|--------------------------------------------------------------------------------------|
| <i>Lottia gigantea</i>                    | Not included as not fungi                                                            |
| <i>Magnaporthe grisea</i>                 | Yes                                                                                  |
| <i>Malassezia globosa</i>                 | Yes                                                                                  |
| <i>Melampsora laricis-populina</i>        | Yes                                                                                  |
| <i>Microsporium canis</i>                 | Yes                                                                                  |
| <i>Microsporium gypseum</i>               | Yes                                                                                  |
| <i>Monosiga brevicollis</i>               | Not included as not fungi                                                            |
| <i>Mucor circinelloides</i>               | Yes                                                                                  |
| <i>Mus musculus</i>                       | Not included as not fungi                                                            |
| <i>Mycosphaerella fijiensis</i>           | Yes                                                                                  |
| <i>Mycosphaerella graminicola</i>         | Yes                                                                                  |
| <i>Nectria hematococca</i>                | Yes                                                                                  |
| <i>Nematostella vectensis</i>             | Not included as not fungi                                                            |
| <i>Neosartorya fischeri</i>               | Yes                                                                                  |
| <i>Neurospora crassa</i>                  | Yes                                                                                  |
| <i>Neurospora tetrasperma</i>             | Yes                                                                                  |
| <i>Paracoccidioides brasiliensis</i>      | Yes                                                                                  |
| <i>Phanerochaete carnosae</i>             | Yes                                                                                  |
| <i>Phanerochaete chrysosporium</i>        | Yes                                                                                  |
| <i>Phlebia brevispora</i>                 | Yes                                                                                  |
| <i>Phlebiopsis gigantea</i>               | Yes                                                                                  |
| <i>Phycomyces blakesleeenae</i>           | Yes                                                                                  |
| <i>Pichia membranifaciens</i>             | Yes                                                                                  |
| <i>Pichia stipitis</i>                    | Yes                                                                                  |
| <i>Pleurotus ostreatus</i> PC15           | Yes                                                                                  |
| <i>Pleurotus ostreatus</i> PC9            | Excluded from 67-gene phylogeny because represented by other <i>Pleurotus</i> genome |
| <i>Pneumocystis carinii</i>               | Excluded from 67-gene phylogeny because of long-branch artifact                      |
| <i>Podospora anserina</i>                 | Yes                                                                                  |
| <i>Postia placenta</i>                    | Yes                                                                                  |
| <i>Puccinia graminis</i>                  | Yes                                                                                  |
| <i>Punctularia strigosozonata</i>         | Yes                                                                                  |
| <i>Pyrenophora teres</i>                  | Yes                                                                                  |
| <i>Pyrenophora tritici-repentis</i>       | Yes                                                                                  |
| <i>Rhizopus oryzae</i>                    | Yes                                                                                  |
| <i>Rhodotorula graminis</i>               | Yes                                                                                  |
| <i>Rhystidhysterion rufulum</i>           | Yes                                                                                  |
| <i>Saccharomyces cerevisiae</i>           | Yes                                                                                  |
| <i>Schizophyllum commune</i>              | Yes                                                                                  |
| <i>Schizosaccharomyces cryophilus</i>     | Yes                                                                                  |
| <i>Schizosaccharomyces japonicus</i>      | Yes                                                                                  |
| <i>Schizosaccharomyces octosporus</i>     | Yes                                                                                  |
| <i>Schizosaccharomyces pombe</i>          | Yes                                                                                  |
| <i>Sclerotinia sclerotiorum</i>           | Yes                                                                                  |
| <i>Septoria musiva</i>                    | Yes                                                                                  |
| <i>Septoria populiicola</i>               | Yes                                                                                  |
| <i>Serpula lacrymans</i>                  | Yes                                                                                  |
| <i>Setosphaeria turcica</i>               | Yes                                                                                  |
| <i>Spathaspora passalidarum</i>           | Yes                                                                                  |
| <i>Sphaeroforma arctica</i> jp610         | Not included as not fungi                                                            |
| <i>Spizellomyces punctatus</i> daom br117 | Yes                                                                                  |
| <i>Sporobolomyces roseus</i>              | Yes                                                                                  |
| <i>Sporotrichum thermophile</i>           | Yes                                                                                  |
| <i>Stagonospora nodorum</i>               | Yes                                                                                  |
| <i>Stereum hirsutum</i>                   | Yes                                                                                  |
| <i>Strongylocentrotus purpuratus</i>      | Not included as not fungi                                                            |
| <i>Takifugu rubripes</i>                  | Not included as not fungi                                                            |
| <i>Thecamonas trahens</i> atcc 50062      | Not included as not fungi                                                            |
| <i>Thielavia terrestris</i>               | Yes                                                                                  |
| <i>Trametes versicolor</i>                | Yes                                                                                  |
| <i>Tremella mesenterica</i>               | Yes                                                                                  |

**Table S1. Cont.**

| Genome sampled for domain phylogeny | Genome sampled for 67-gene fungal phylogeny? |
|-------------------------------------|----------------------------------------------|
| <i>Trichoderma atoviride</i>        | Yes                                          |
| <i>Trichoderma reesei</i>           | Yes                                          |
| <i>Trichoderma virens</i>           | Yes                                          |
| <i>Trichophyton equinum</i>         | Yes                                          |
| <i>Trichoplax adhaerens</i>         | Not included as not fungi                    |
| <i>Uncinocarpus reesii</i>          | Yes                                          |
| <i>Ustilago maydis</i>              | Yes                                          |
| <i>Verticillium albo-atrum</i>      | Yes                                          |
| <i>Verticillium dahliae</i>         | Yes                                          |
| <i>Wallemia sebi</i>                | Yes                                          |
| <i>Wickerhamomyces anomalus</i>     | Yes                                          |
| <i>Wolfiporia cocos</i>             | Yes                                          |
| <i>Xenopus tropicalis</i>           | Not included as not fungi                    |
| <i>Yarrowia lipolytica</i>          | Yes                                          |





Table S2. Cont.

| Fusion           | Node depth of fusion | Model used for likelihood evaluation of character distribution (fused/unfused) in Mesquite (1)* | Forward rate (fusion) | Reverse rate (fission) | Proportional likelihood of branching position of fusion/s shown in Fig. 2 <sup>†</sup> | No. of fissions | Proportional likelihood of fissions <sup>‡</sup> | Notes (See <i>SI Appendix</i> for diagrammatic outputs from Mesquite analysis summarizing the distribution of fused, unfused, and absent characters used to calculate proportional likelihoods)                     |
|------------------|----------------------|-------------------------------------------------------------------------------------------------|-----------------------|------------------------|----------------------------------------------------------------------------------------|-----------------|--------------------------------------------------|---------------------------------------------------------------------------------------------------------------------------------------------------------------------------------------------------------------------|
| 32B <sup>‡</sup> | 23                   | Asymm. 2                                                                                        | 0.098                 | 4.809                  | 0.994                                                                                  | 5               | 1, 1, 1, 1, 0.913                                | Fusion appears as two distinct domain architectures so counted as two fusion events (32A and 32B)                                                                                                                   |
| 33               | 68                   | MK1                                                                                             | 0.127                 | —                      | 0.909                                                                                  | 0               |                                                  |                                                                                                                                                                                                                     |
| 34 <sup>‡</sup>  | 72                   | Asymm. 2                                                                                        | 0.211                 | 0.557                  | 0.709                                                                                  | 4               | 0.969, 1, 0.872, 1                               | Proportional likelihood for ancestral fusion at node shown (Fig. 2) is weak. However, this solution is favored, because, even if one assumes multiple convergent fusions, the data still require multiple fissions  |
| 35               | 107                  | MK1                                                                                             | 0.169                 | —                      | 0.979                                                                                  | 0               |                                                  |                                                                                                                                                                                                                     |
| 36 <sup>‡</sup>  | 23                   | Asymm. 2                                                                                        | 0.107                 | 3.24                   | 0.999                                                                                  | 7               | 1, 1, 1, 1, 1, 1, 0.924                          |                                                                                                                                                                                                                     |
| 37               | 5                    | Asymm. 2                                                                                        | 0.19                  | 7.126                  | 0.349                                                                                  | 2               | 1, 1                                             |                                                                                                                                                                                                                     |
| 38 <sup>‡</sup>  | 2/1                  | MK1                                                                                             | 0.123                 | —                      | 0.957, 1                                                                               | 0               |                                                  | Low proportional likelihood for single ancestral fusion suggests separate convergent fusion. Counted as two separate convergent fusions.                                                                            |
| 39 <sup>‡</sup>  | 19                   | Asymm. 2                                                                                        | 0.065                 | 0.85                   | 0.989                                                                                  | 1               | 1                                                |                                                                                                                                                                                                                     |
| 40 <sup>‡</sup>  | 8                    | Asymm. 2                                                                                        | 0.271                 | 18.196                 | 0.708                                                                                  | 3               | 1, 0.974, 0.605                                  | Proportional likelihood for ancestral fusion at node shown (Fig. 2) is weak. However, this solution is favored, because, even if one assumes multiple convergent fusions, the data still require multiple fissions. |
| 41               | 17                   | Asymm. 2                                                                                        | 0.063                 | 0.796                  | 0.999                                                                                  | 1               | 1                                                |                                                                                                                                                                                                                     |
| 42               | 5                    | Asymm. 2                                                                                        | 0.178                 | 15.091                 | 0.952                                                                                  | 1               | 1                                                |                                                                                                                                                                                                                     |
| 43               | 9                    | MK1                                                                                             | 0.059                 | —                      | 0.995                                                                                  | 0               |                                                  |                                                                                                                                                                                                                     |
| 44 <sup>‡</sup>  | 18                   | Asymm. 2                                                                                        | 0.074                 | 2.46                   | 0.997                                                                                  | 2               | 1, 1                                             |                                                                                                                                                                                                                     |
| 45 <sup>‡</sup>  | 25                   | Asymm. 2                                                                                        | 0.085                 | 1.055                  | 0.842                                                                                  | 3               | 1, 1, 1                                          |                                                                                                                                                                                                                     |
| 46               | 6                    | Asymm. 2                                                                                        | 0.081                 | 3.876                  | 0.998                                                                                  | 1               | 1                                                |                                                                                                                                                                                                                     |
| 47               | 9                    | MK1                                                                                             | 0.059                 | —                      | 0.995                                                                                  | 0               |                                                  |                                                                                                                                                                                                                     |
| 48               | 9                    | Asymm. 2                                                                                        | 0.076                 | 2.67                   | 0.955                                                                                  | 1               | 1                                                |                                                                                                                                                                                                                     |
| 49 <sup>‡</sup>  | 24                   | Asymm. 2                                                                                        | 0.08                  | 1.797                  | 0.985                                                                                  | 4               | 0.826, 1, 1, 1                                   |                                                                                                                                                                                                                     |
| 50 <sup>‡</sup>  | 18                   | Asymm. 2                                                                                        | 0.079                 | 3.262                  | 0.997                                                                                  | 2               | 1, 0.996                                         |                                                                                                                                                                                                                     |
| 51               | 1                    | MK1                                                                                             | 0.059                 | —                      | 0.994                                                                                  | 0               |                                                  |                                                                                                                                                                                                                     |
| 52               | 2                    | MK1                                                                                             | 0.058                 | —                      | 0.999                                                                                  | 0               |                                                  |                                                                                                                                                                                                                     |
| 53               | 3                    | MK1                                                                                             | 0.06                  | —                      | 0.992                                                                                  | 0               |                                                  |                                                                                                                                                                                                                     |
| 54 <sup>‡</sup>  | 18                   | Asymm. 2                                                                                        | 0.12                  | 7.68                   | 0.994                                                                                  | 5               | 1, 0.992, 1, 1, 1                                |                                                                                                                                                                                                                     |
| 55               | 5                    | Asymm. 2                                                                                        | 0.362                 | 28.375                 | 0.782                                                                                  | 3               | 1, 1, 1                                          |                                                                                                                                                                                                                     |
| 56 <sup>‡</sup>  | 23                   | Asymm. 2                                                                                        | 0.095                 | 3.809                  | 0.999                                                                                  | 5               | 1, 0.444, 1, 1, 0.786                            |                                                                                                                                                                                                                     |
| 57               | 1                    | MK1                                                                                             | 0.059                 | —                      | 0.997                                                                                  | 0               |                                                  |                                                                                                                                                                                                                     |
| 58               | 2                    | MK1                                                                                             | 0.059                 | —                      | 0.998                                                                                  | 0               |                                                  |                                                                                                                                                                                                                     |
| 59               | 5                    | Asymm. 2                                                                                        | 0.141                 | 11.641                 | 0.998                                                                                  | 1               | 1                                                |                                                                                                                                                                                                                     |
| 60               | 9                    | Asymm. 2                                                                                        | 0.073                 | 2.674                  | 0.996                                                                                  | 1               | 0.995                                            |                                                                                                                                                                                                                     |
| 61 <sup>‡</sup>  | 18                   | Asymm. 2                                                                                        | 0.111                 | 6.96                   | 0.995                                                                                  | 5               | 1, 1, 0.993, 1, 0.983                            |                                                                                                                                                                                                                     |
| 62               | 114                  | MK1                                                                                             | —                     | 0.06                   | 0.999                                                                                  | 1               | 0.991                                            | Fused before Fungi                                                                                                                                                                                                  |

—, Rate value absent as only one type of character transition was identified (fission or fusion).

\*When only fusions or fissions were present, the MK 1 model was used. When both fusions and fissions were present, the Asymm 2 param. model was used.

<sup>†</sup>In some cases proportional likelihood analyses of fusion states favored separate convergent gene fusions, in these cases two values are listed. The proportional likelihood values which correspond to each fusion are labeled on the Mesquite output trees in *SI Appendix*.

<sup>‡</sup>Proportional likelihood values for multiple fissions are listed. The proportional likelihood values that correspond to each fission are labeled on the Mesquite output trees in *SI Appendix*.

1. Maddison WP, Maddison DR (2011) Mesquite: A modular system for evolutionary analysis. Version 2.75. Available at <http://mesquiteproject.org>.

2. Slot JC, Rokas A (2010) Multiple GAL pathway gene clusters evolved independently and by different mechanisms in fungi. *Proc Natl Acad Sci USA* 107(22):10136–10141.

**Table S3. EST data providing support that the gene is transcribed as a gene fusion and listing model used for domain phylogenies**

| ID* | EST support<br>[yes (GenBank ID)/absent<br>(blank)]                           | Domain 1                                         | Model <sup>†</sup> | I <sup>‡</sup> | G <sup>§</sup> | Domain 2                           | Model <sup>¶</sup> | I <sup>‡</sup> | G <sup>§</sup> |
|-----|-------------------------------------------------------------------------------|--------------------------------------------------|--------------------|----------------|----------------|------------------------------------|--------------------|----------------|----------------|
| 1   | GR748940, CU897583                                                            | PRA-CH~PRA-PH                                    | LG+I+G             | 0.128          | 0.625          | Histidinol_dh                      | LG+I+G             | 0.178          | 1.167          |
| 2   | DB663361, DB663361                                                            | Epimerase                                        | LG+I+G             | 0.228          | 1.018          | Aldose_epim                        | LG+I+G             | 0.227          | 1.029          |
| 3   |                                                                               | SurE                                             | LG+I+G             | 0.042          | 1.068          | TTL                                | LG+I+G             | 0.046          | 1.096          |
| 4   |                                                                               | PseudoU_synth_2                                  | LG+I+G             | 0.08           | 1.14           | dCMP_cyt_deam_1                    | LG+I+G             | 0.096          | 1.17           |
| 5   |                                                                               | PAP2                                             | LG+I+G             | 0.08           | 1.14           | dCMP_cyt_deam_1                    | LG+I+G+F           | 0.078          | 1.068          |
| 6   | JK213075                                                                      | URO-D                                            | LG+G               | —              | 0.76           | Porphobil_deam~<br>Porphobil_deamC | LG+I+G             | 0.066          | 0.93           |
| 7   |                                                                               | Iso_dh                                           | LG+G               | —              | 0.672          | Aconitase~Aconitase_C              | LG+I+G             | 0.042          | 0.943          |
| 8   | GT899320, EX842960,<br>FP690749, GE931171,<br>EX842960, FP690749,<br>JK213037 | GATase~IGPS                                      | LG+I+G             | 0.072          | 0.961          | PRAI                               | LG+I+G             | 0.166          | 0.855          |
| 9   | GE294957                                                                      | Indigoidine_A                                    | LG+I+G             | 0.032          | 0.974          | PfkB                               | LG+I+G             | 0.068          | 0.992          |
| 10  | GH346002                                                                      | Peroxidase                                       | WAG+I+G+F          | 0.057          | 2.093          | WSC                                | —                  | —              | —              |
| 11  | EY995910, EC046483                                                            | Allantoicase~Allantoicase                        | LG+I+G             | 0.073          | 1.124          | Ureidogly_hydro                    | LG+I+G             | 0.052          | 1.261          |
| 12  |                                                                               | Pex2_Pex12                                       | LG+G               | —              | 0.848          | SPX~Ank_2~GDPD                     | LG+I+G+F           | 0.017          | 1.362          |
| 13  | EX789001, JK212765                                                            | Spermine_synth                                   | LG+I+G             | 0.064          | 1.118          | Saccharop_dh                       | LG+G               | —              | 0.53           |
| 14  | DY845282                                                                      | Cys_Met_Meta_PP                                  | LG+I+G             | 0.139          | 0.76           | GHMP_kinases_N~<br>GHMP_kinases_C  | LG+I+G             | 0.085          | 1.048          |
| 15  |                                                                               | SET                                              | LG+I+G             | 0.065          | 1.508          | dCMP_cyt_deam_1                    | LG+G               | —              | 0.657          |
| 16  |                                                                               | Thiolase_N~Thiolase_C                            | LG+I+G             | 0.098          | 1.15           | KH_2, Ribosomal_S3_C               | LG+G               | —              | 0.424          |
| 17  | DY892051                                                                      | FolB~FolB                                        | LG+I+G+F           | 0.042          | 1.665          | HPPK~Pterin_bind                   | LG+I+G             | 0.123          | 1.212          |
| 18  |                                                                               | NUDIX                                            | LG+I+G             | 0.084          | 1.599          | TPK_catalytic~TPK_<br>B1_binding   | LG+I+G             | 0.041          | 1.442          |
| 19  |                                                                               | Rsm22                                            | LG+I+G             | 0.044          | 1.324          | CtaG_Cox11                         | LG+I+G             | 0.121          | 0.839          |
| 20  |                                                                               | Hydrolase                                        | LG+I+G             | 0.04           | 0.933          | CDP-OH_P_transf                    | LG+I+G+F           | 0.086          | 1.155          |
| 21  | FY125691                                                                      | COX15-CtaA                                       | LG+I+G+F           | 1.039          | 0.143          | Fer2                               | LG+I+G             | 0.162          | 1.118          |
| 22  | FY173519                                                                      | Palm_thioest                                     | LG+I+G             | 0.036          | 1.146          | PAP2                               | LG+I+G+F           | 0.079          | 1.109          |
| 23  | FY173519                                                                      | Aconitase~Aconitase_C                            | RtREV+G+F          | —              | 1.97           | Ribosomal_L21p                     | LG+I+G             | 0.155          | 0.665          |
| 24  |                                                                               | Methyltransf_16                                  | LG+I+G             | 0.07           | 1.096          | dCMP_cyt_deam_1                    | LG+I+G+F           | 0.053          | 1.294          |
| 25  |                                                                               | FSH1                                             | LG+I+G             | 0.064          | 0.841          | DHFR_1                             | LG+I+G             | 0.062          | 1.644          |
| 26  |                                                                               | adh_short                                        | CpREV+I+G+F        | 0.049          | 1.648          | PIG-F                              | LG+I+G+F           | 0.033          | 1.507          |
| 27  |                                                                               | Peptidase_M1~Leuk-<br>A4-hydro_c                 | LG+I+G+F           | 0.052          | 1.011          | IPPT                               | LG+I+G             | 0.057          | 1.134          |
| 28  | JK211039                                                                      | PGAM                                             | LG+I+G             | 0.055          | 1.155          | Thymidylat_synt                    | LG+I+G             | 0.198          | 0.833          |
| 29  |                                                                               | Rm1D_sub_bind                                    | LG+I+G             | 0.03           | 0.966          | PX~Vps5                            | LG+I+G             | 0.025          | 1.927          |
| 30  |                                                                               | Flavoprotein                                     | LG+I+G             | 0.176          | 0.875          | Thymidylat_synt                    | LG+G               | —              | 0.853          |
| 31  |                                                                               | TPR_2 Repeats                                    | LG+I+G             | 0.035          | 1.666          | Ribosomal_S7e                      | LG+G               | —              | 0.804          |
| 32  |                                                                               | WW and FF Repeats                                | —                  | —              | —              | HATPase_c~HSP90                    | LG+I+G+F           | 0.048          | 0.925          |
| 33  | GW365491                                                                      | Glyoxal_oxid_N                                   | LG+I+G             | 0.035          | 1.4            | DUF1929                            | —                  | —              | —              |
| 34  | EB044201                                                                      | Na_H_Exchange                                    | —                  | —              | —              | Nha1_C                             | LG+I+G+F           | 0.054          | 1.052          |
| 35  | HS540726                                                                      | WSC Repeats                                      | —                  | —              | —              | Glyoxal_oxid_N~DUF1929             | LG+I+G             | 0.05           | 1.691          |
| 36  |                                                                               | AAA                                              | LG+I+G             | 0.242          | 0.354          | HATPase_c~HATPase_c                | LG+G               | —              | 0.872          |
| 37  |                                                                               | Adh_short                                        | LG+I+G+F           | 0.032          | 1.455          | SelP_N~SelP_N~DUF3716              | LG+I+G             | 0.06           | 1.523          |
| 38  |                                                                               | ALG3                                             | LG+I+G             | 0.155          | 1.623          | 2OG-Fell_Oxy                       | —                  | —              | —              |
| 39  |                                                                               | Allantoicase~Allantoicase                        | LG+I+G             | 0.085          | 0.966          | Ank_2~DIL                          | —                  | —              | —              |
| 39  |                                                                               | Ank_2~DIL                                        | —                  | —              | —              | Allantoicase~Allantoicase          | LG+I+G             | 0.085          | 0.966          |
| 40  |                                                                               | Biotin_lipoyl~E3_binding~<br>2-oxoacid_dh        | LG+I+G+F           | 0.129          | 1.112          | Sec20                              | LG+I+G+F           | 0.021          | 1.344          |
| 41  |                                                                               | BTB                                              | LG+G               | —              | 1.94           | Bromodomain                        | LG+I+G             | 0.074          | 1.364          |
| 42  |                                                                               | KH_1                                             | LG+G               | —              | 0.88           | Aconitase~Aconitase_C              | LG+I+G             | 0.132          | 0.614          |
| 43  |                                                                               | DUF298                                           | LG+I+G             | 0.024          | 1.897          | Ribosomal_L32e                     | Dayhoff+I+G        | 0.081          | 0.995          |
| 44  |                                                                               | Flavodoxin_1~<br>FAD_binding_<br>1~NAD_binding_1 | LG+I+G+F           | 0.047          | 1.107          | ETF                                | LG+I+G             | 0.046          | 1.002          |
| 45  |                                                                               | GTP_EFTU                                         | LG+G               | —              | 0.804          | Calreticulin                       | WAG+I+G            | 0.112          | 1.201          |
| 46  |                                                                               | Methyltransf_16                                  | LG+G               | —              | 0.871          | PhyH                               | LG+I+G             | 0.109          | 0.986          |
| 47  |                                                                               | MIF4G~MA3                                        | LG+I+G+F           | 0.175          | 0.868          | Pyr_redox_2~<br>Pyr_redox_dim      | LG+I+G+F           | 0.175          | 0.868          |
| 48  |                                                                               | MSC                                              | LG+I+G             | 0.035          | 1.313          | Ribosomal_L44                      | RtREV+I+G          | 0.24           | 0.418          |
| 49  | FL604979                                                                      | Ribosomal_L32e                                   | LG+G               | —              | 0.827          | Memo                               | LG+I+G             | 0.086          | 1.013          |



**Table S4. Protein domains used for fungal species phylogeny**

| PFAM                | NCBI Saccharomyces | Domain name                                                           |
|---------------------|--------------------|-----------------------------------------------------------------------|
| PF00022.14          | AAA34391.1         | Actin                                                                 |
| PF00709             | CAA88590.1         | Adenylosuccinate synthetase                                           |
| PF05856             | NP_012912.1        | ARP2/3 complex 20 kDa subunit (ARPC4)                                 |
| PF04045             | NP_014433.1        | Arp2/3 complex, 34 kDa subunit p34-Arc                                |
| PF02374             | AAT93183.1         | Ars operon                                                            |
| PF04729             | NP_012420.1        | ASF1 like histone chaperone                                           |
| PF03477_..._PF02867 | NP_010993.1        | ATP cone _ Ribonucleotide reductase                                   |
| PF01813             | NP_010863.1        | ATP synthase subunit D                                                |
| PF08145             | NP_013764.1        | BOP1                                                                  |
| PF05291             | NP_009806.3        | Bystin                                                                |
| PF04054             | NP_010017.2        | CCR4-Not complex component, Not1                                      |
| PF04078             | NP_014111.1        | Cell differentiation family, Rcd1-like                                |
| PF01394.15          | EDN61921.1         | Clathrin                                                              |
| PF07718             | EDN60571.1         | Coatamer beta C-terminal region                                       |
| PF08767             | NP_011734.3        | CRM1 C-terminal                                                       |
| PF06418             | CAA37941.1         | CTP synthase N terminus                                               |
| PF04442             | NP_015193.1        | Cytochrome c oxidase assembly protein CtaG/Cox11                      |
| PF02167             | NP_014708.1        | Cytochrome C1                                                         |
| PF02628             | EDN63118.1         | Cytochrome oxidase assembly protein                                   |
| PF01916             | EDN62305.1         | Deoxyhypusine synthase                                                |
| PF00940             | EDN59114.1         | DNA-dependent RNA polymerase                                          |
| PF08351_PF05127     | NP_014267.1        | Domain of unknown function (DUF1726)                                  |
| PF04034             | NP_014648.1        | Domain of unknown function (DUF367)                                   |
| PF04037             | NP_013967.1        | Domain of unknown function (DUF382)                                   |
| PF01912             | Q12522.1           | eIF-6 family                                                          |
| PF03587             | NP_013287.1        | EMG1/NEP1 methyltransferase                                           |
| PF02919_PF01028     | NP_014637.1        | Eukaryotic DNA topoisomerase I                                        |
| PF03332             | NP_116609.1        | Eukaryotic phosphomannomutase                                         |
| PF08644             | NP_011308.1        | FACT complex subunit (SPT16/CDC68)                                    |
| PF01125             | NP_009990.1        | G10 protein                                                           |
| PF00342             | EDV11919.1         | Glucose-6-phosphate isomerase                                         |
| PF00953             | NP_009802.3        | Glycosyl transferase family 4                                         |
| PF00009.22          | EDN61207.1         | GTP-binding elongation factor family, EF-Tu/EF-1A subfamily           |
| PF00012.15          | AET14830.1         | Hsp70                                                                 |
| PF00183.13          | P02829.1           | HSP90                                                                 |
| PF01875             | EDN63335.1         | Memo-like protein                                                     |
| PF07994             | NP_012382.2        | Myo-inositol-1-phosphate synthase                                     |
| PF00063.16          | AAA34810.1         | Myosin head (motor domain)                                            |
| PF01233_PF02799     | P14743.1           | Myristoyl-CoA:protein N-myristoyltransferase, N and C-terminal domain |
| PF01592             | NP_014869.3        | NifU-like N-terminal domain                                           |
| PF04981             | AAA74491.1         | NMD3 family                                                           |
| PF04065             | EDN61456.1         | Not1 N-terminal domain, CCR4-Not complex component                    |
| PF06732             | NP_011617.1        | Pescadillo N terminus                                                 |
| PF10559_PF00344     | NP_009842.1        | Plug domain of Sec61p                                                 |
| PF01379_PF03900     | CAA77804.1         | Porphobilinogen deaminase                                             |
| PF00490             | P05373.2           | Porphobilinogen synthase                                              |
| PF08082_..._PF08084 | NP_012035.1        | PRO8NT (NUC069), PrP8 N-terminal domain                               |
| PF06777             | NP_011098.3        | Protein of unknown function (DUF1227)                                 |
| PF06026             | NP_014738.1        | Ribose 5-phosphate isomerase A (phosphoriboisomerase A)               |
| PF01775             | NP_013969.3        | Ribosomal L18ae/LX protein domain                                     |
| PF01294             | NP_013862.1        | Ribosomal protein L13e                                                |
| PF00828             | CAA64550.1         | Ribosomal protein L18e/L15                                            |
| PF01092             | NP_015235.1        | Ribosomal protein S6e                                                 |
| PF01251             | NP_014739.1        | Ribosomal protein S7e                                                 |
| PF00833             | NP_013688.1        | Ribosomal S17                                                         |
| PF01015             | NP_013648.1        | Ribosomal S3Ae family                                                 |
| PF09416             | NP_013797.1        | RNA helicase (UPF2 interacting domain)                                |
| PF04563.10          | CAA99357.1         | RNA polymerase beta subunit                                           |
| PF04997.7           | EEU08500.1         | RNA polymerase Rpb1, domain 1                                         |
| PF07780             | NP_009877.1        | Spb1 C-terminal domain                                                |
| PF03531             | NP_013642.1        | Structure-specific recognition protein (SSRP1)                        |
| PF00118.19          | P19882.1           | TCP-1/cpn60 chaperonin family                                         |
| PF00303             | AAA60940.1         | Thymidylate synthase                                                  |

**Table S4. Cont.**

| PFAM       | NCBI Saccharomyces | Domain name                              |
|------------|--------------------|------------------------------------------|
| PF00091.20 | AAA35181.1         | Tubulin/FtsZ family, GTPase domain       |
| PF00091.20 | CAA24603.1         | Tubulin/FtsZ family, GTPase domain       |
| PF01209    | P49017.1           | UbiE/COQ5 methyltransferase family       |
| PF03690    | NP_011083.3        | Uncharacterized protein family (UPF0160) |

Fifty-seven of these 67 proteins are derived from ref.1. The 10 remaining proteins (gray shading) are gene families we favor for multigene phylogeny of the Fungi.

1. Torruella G, et al. (2012) Phylogenetic relationships within the Opisthokonta based on phylogenomic analyses of conserved single-copy protein domains. *Mol Biol Evol* 29(2):531–544.

#### [Dataset S1 \(XLS\)](#)

Data showing genome checks of gene fusion/fission annotations.

#### [SI Appendix \(PDF\)](#)

Collated phylogenetic data and genome analysis of fusions 1–63. This PDF file contains all 63 final accepted gene fusions, with the numbering scheme used in Fig. 2 (32 contains two fusions labeled “32a” and “32b”). The file therefore is split into 62 sections, each containing the gene sequences (in FASTA format) of the separate domains that form the gene fusion, a note on how the tree was constructed, a note explaining the absence of one domain tree (if absent), and the trees annotated with PFAM domains for each sequence given. Bootstrap supports are given (in red). Putative genome annotation corrections on the presence and absence of gene-fusion characters are labeled with ticks or crosses (where appropriate). The data supporting these annotation corrections can be found in [Dataset S1](#). Trees that indicate additional fusions are labeled with the appropriate number and can be found elsewhere in the file as indicated by the number given. Diagrammatic results from Mesquite analysis also are included for each fusion.
