# Supplementary material
Source: PubMed Central journal article supplement (PMC3535628)
Supplement: 1210909110_sapp.pdf [file 1210909110_sapp.pdf]

# Putative Fusion 1

September 26, 2012

## 1 Fasta Sequences

These are the unfused sequences identified by fdfBLAST belonging to the putative gene fusion in FASTA format. Accessions may be shortened, but belong to either the taxons individual genome project or NCBI's accession numbering.

```
>lcl|SPBC29A302c unnamed protein product
MALLPFFDLTNFESDASEELGWLKYVGRVQTRVFPQHFKDNLEKVRKISSETIDVIVDTTA
ELGPEACVLLNAGALAILVNEEMLNELADISPRLVVKTDTTDIGKIEKLSQVAGSIQW
IGSAENYPPDFFERASKIIHKAVMPEGGGRTLYLEFPEQPSMEVLKSFVHVSVPVLSSS
FLTVPKAEPPKLSLADLILISANTDREDGLFSTLVVNELGIALGLVYSSKESVAESLKT
GTGVYQSRKRGLWYKGAASSGAVQHLIHIDVDCDEDCRFVYVYQTGKGFCHLDTLHCFGQA
SGLCQLEKTLIDRKNNAPEGSYARLFSDPKLLRAKIMEEAEELCDATTKENVIWEMADL
MYFAITRCVSGSVSLNDISRHLDLKHRKVTRRKGDQKVAWQEKLKDKGGVANTSUTA
>lcl|SPBC171113 unnamed protein product
MPEYEIQVPSYRAAALTAERTRLLARPIQNTQKIRTIQPIIEDVKSRGEASLIDYASK
FEKVQLKSAVLKAPFDDDLKISPMIKEDIDIAFNIFAFHSSQLRPTIAVQTMRGVVCQ
RMSRPINRVGLYIPGGTAVLPSTALMLGVPKAVAGCPHVISTPVRKDGTVAPEIVYIAN
KIGAEAIILAGGAQAIAAMAYGISGVPKVNKIFGPGNQFVTAAKMHVQNDYGALVAIDL
AGPSEVLVIADETCNPEVALDLSQAHEGLDSQIILLTVSLSPEMFDRIQKAINDHALR
LSRSYIIKHAIKKSVIVQVDNVDQAFEWNSLYGPEHLVLHLKNASSYIPKIDNAGSVFVG
PWSPVSMGDYASGTNHTLPTYGYASSYSGVSTDSFLKYITTQELTEEGIQRLGPTVIRLA
ELEGLTAHADAVRVRGVRL
```

## 2 Annotated Phylograms

All trees were generated from an initial run of Darren's Orchard pipeline against 139 taxa (Table S1), using the above corresponding un-fused sequences as BLAST seeds. The alignments were then checked for any missing taxa, manually masked and then ProtTest3 was run, please see the Methods section for detail. The final trees were generated by the following command:

```
phyml -i alignment_file -d aa -b 100 -m model -c 8 -v invariant_sites -s BEST --quiet
-a gamma
```

Styling and annotation was made possible by Dendroscope and Inkscape.

## 3 Mesquite Cladogram

This tree is the 68-gene concatenated phylogeny (Fig. 1), with the presence of a fusion (black), presence of a fission (white), and absent/undetermined (grey) status of gene fusion characters plotted on to it using a "1/0/-" nexus-style data matrix. We used the program 'Mesquite' to calculate proportional likelihoods based on either an "Mk1" or "Assym. 2 param model." (see Table S4) of character change across the fungal phylogeny (Fig. 1). This allowed for a proportional likelihood of the position of the fusion/fission to be calculated.

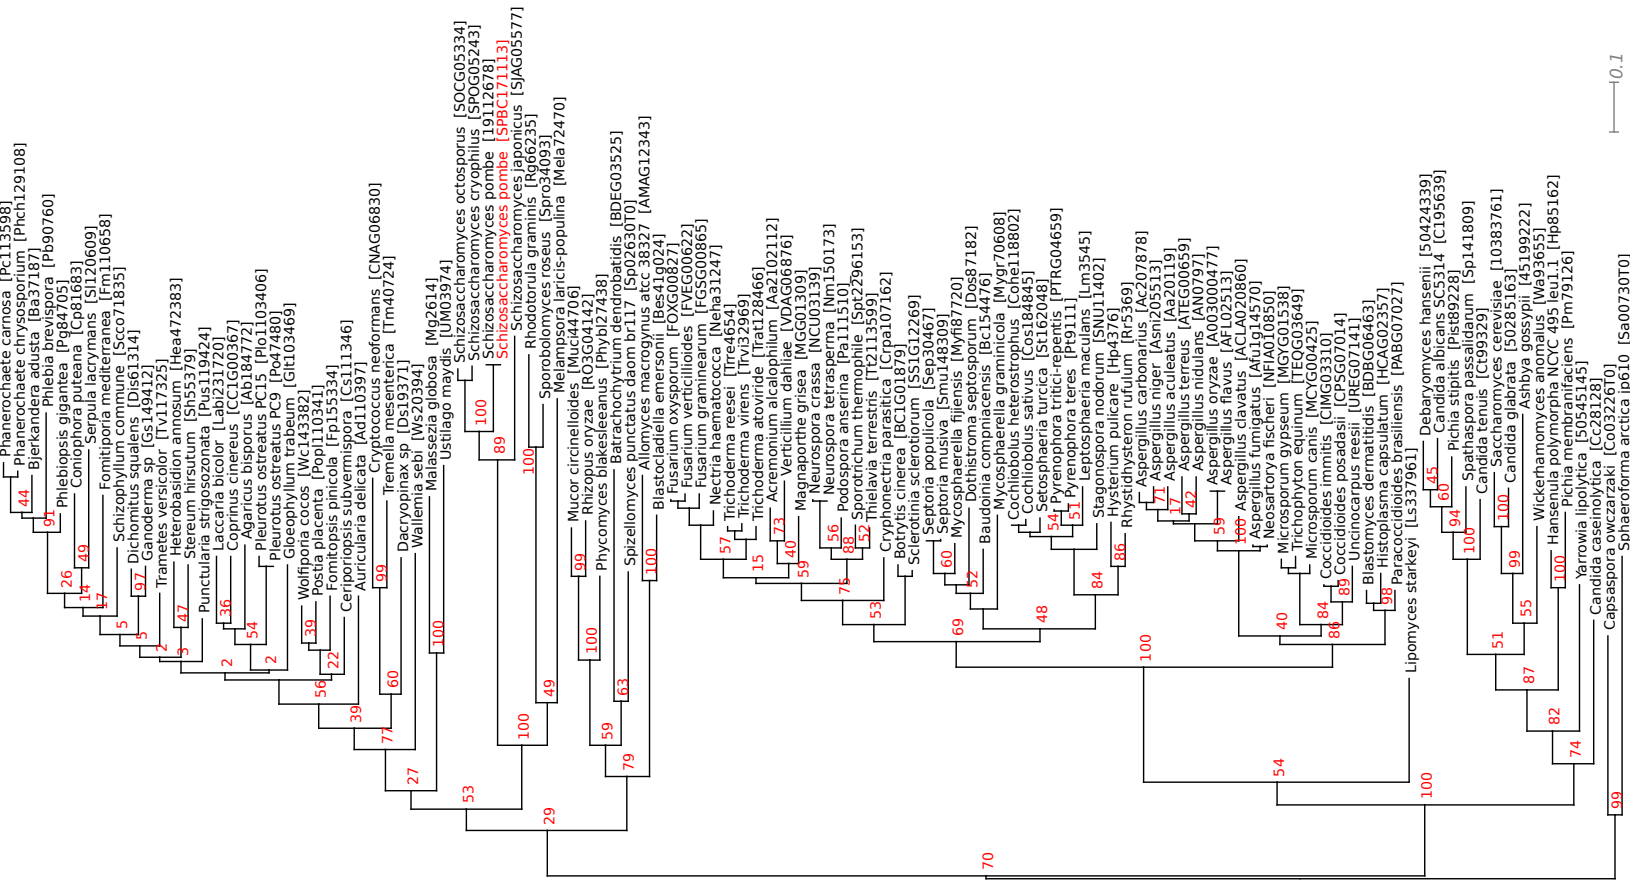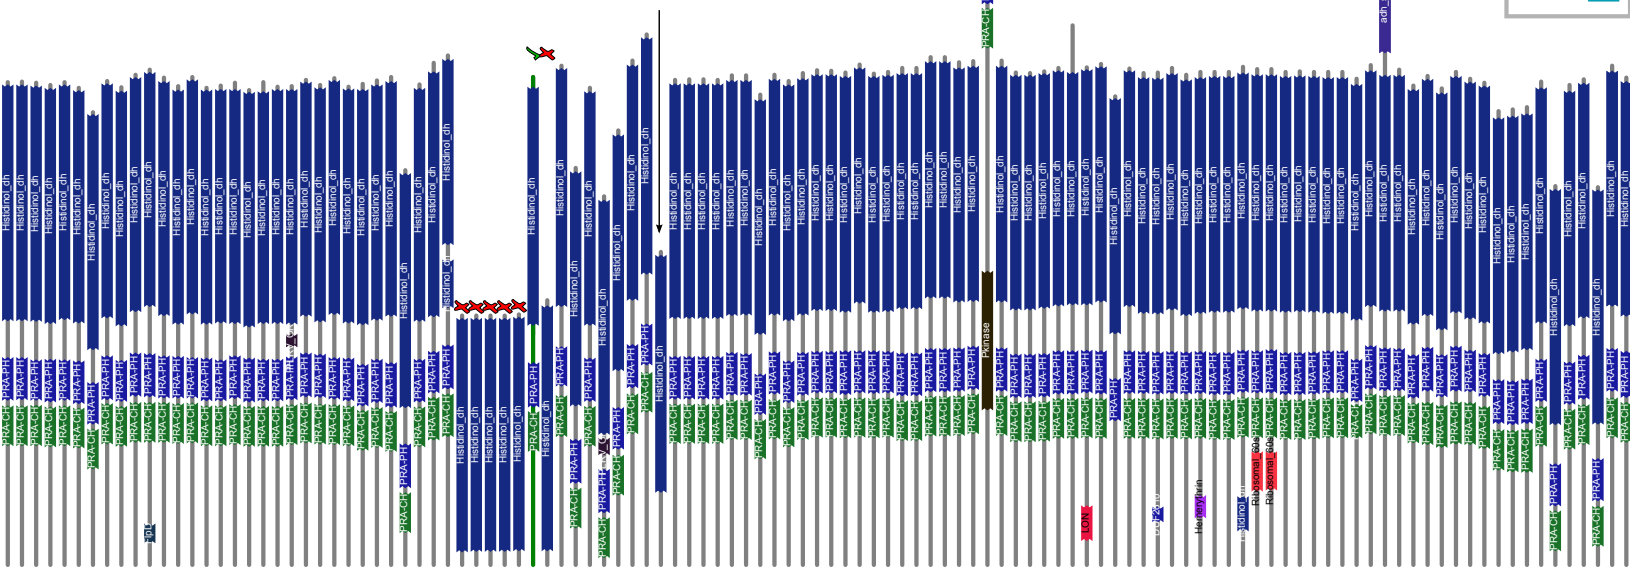

This is a potential gene fission but is not counted here because the *Blastocladiella* genome assembly is incomplete.

Annotation  
 ✓ Presence  
 ✗ Absence  
 # Other Fusion

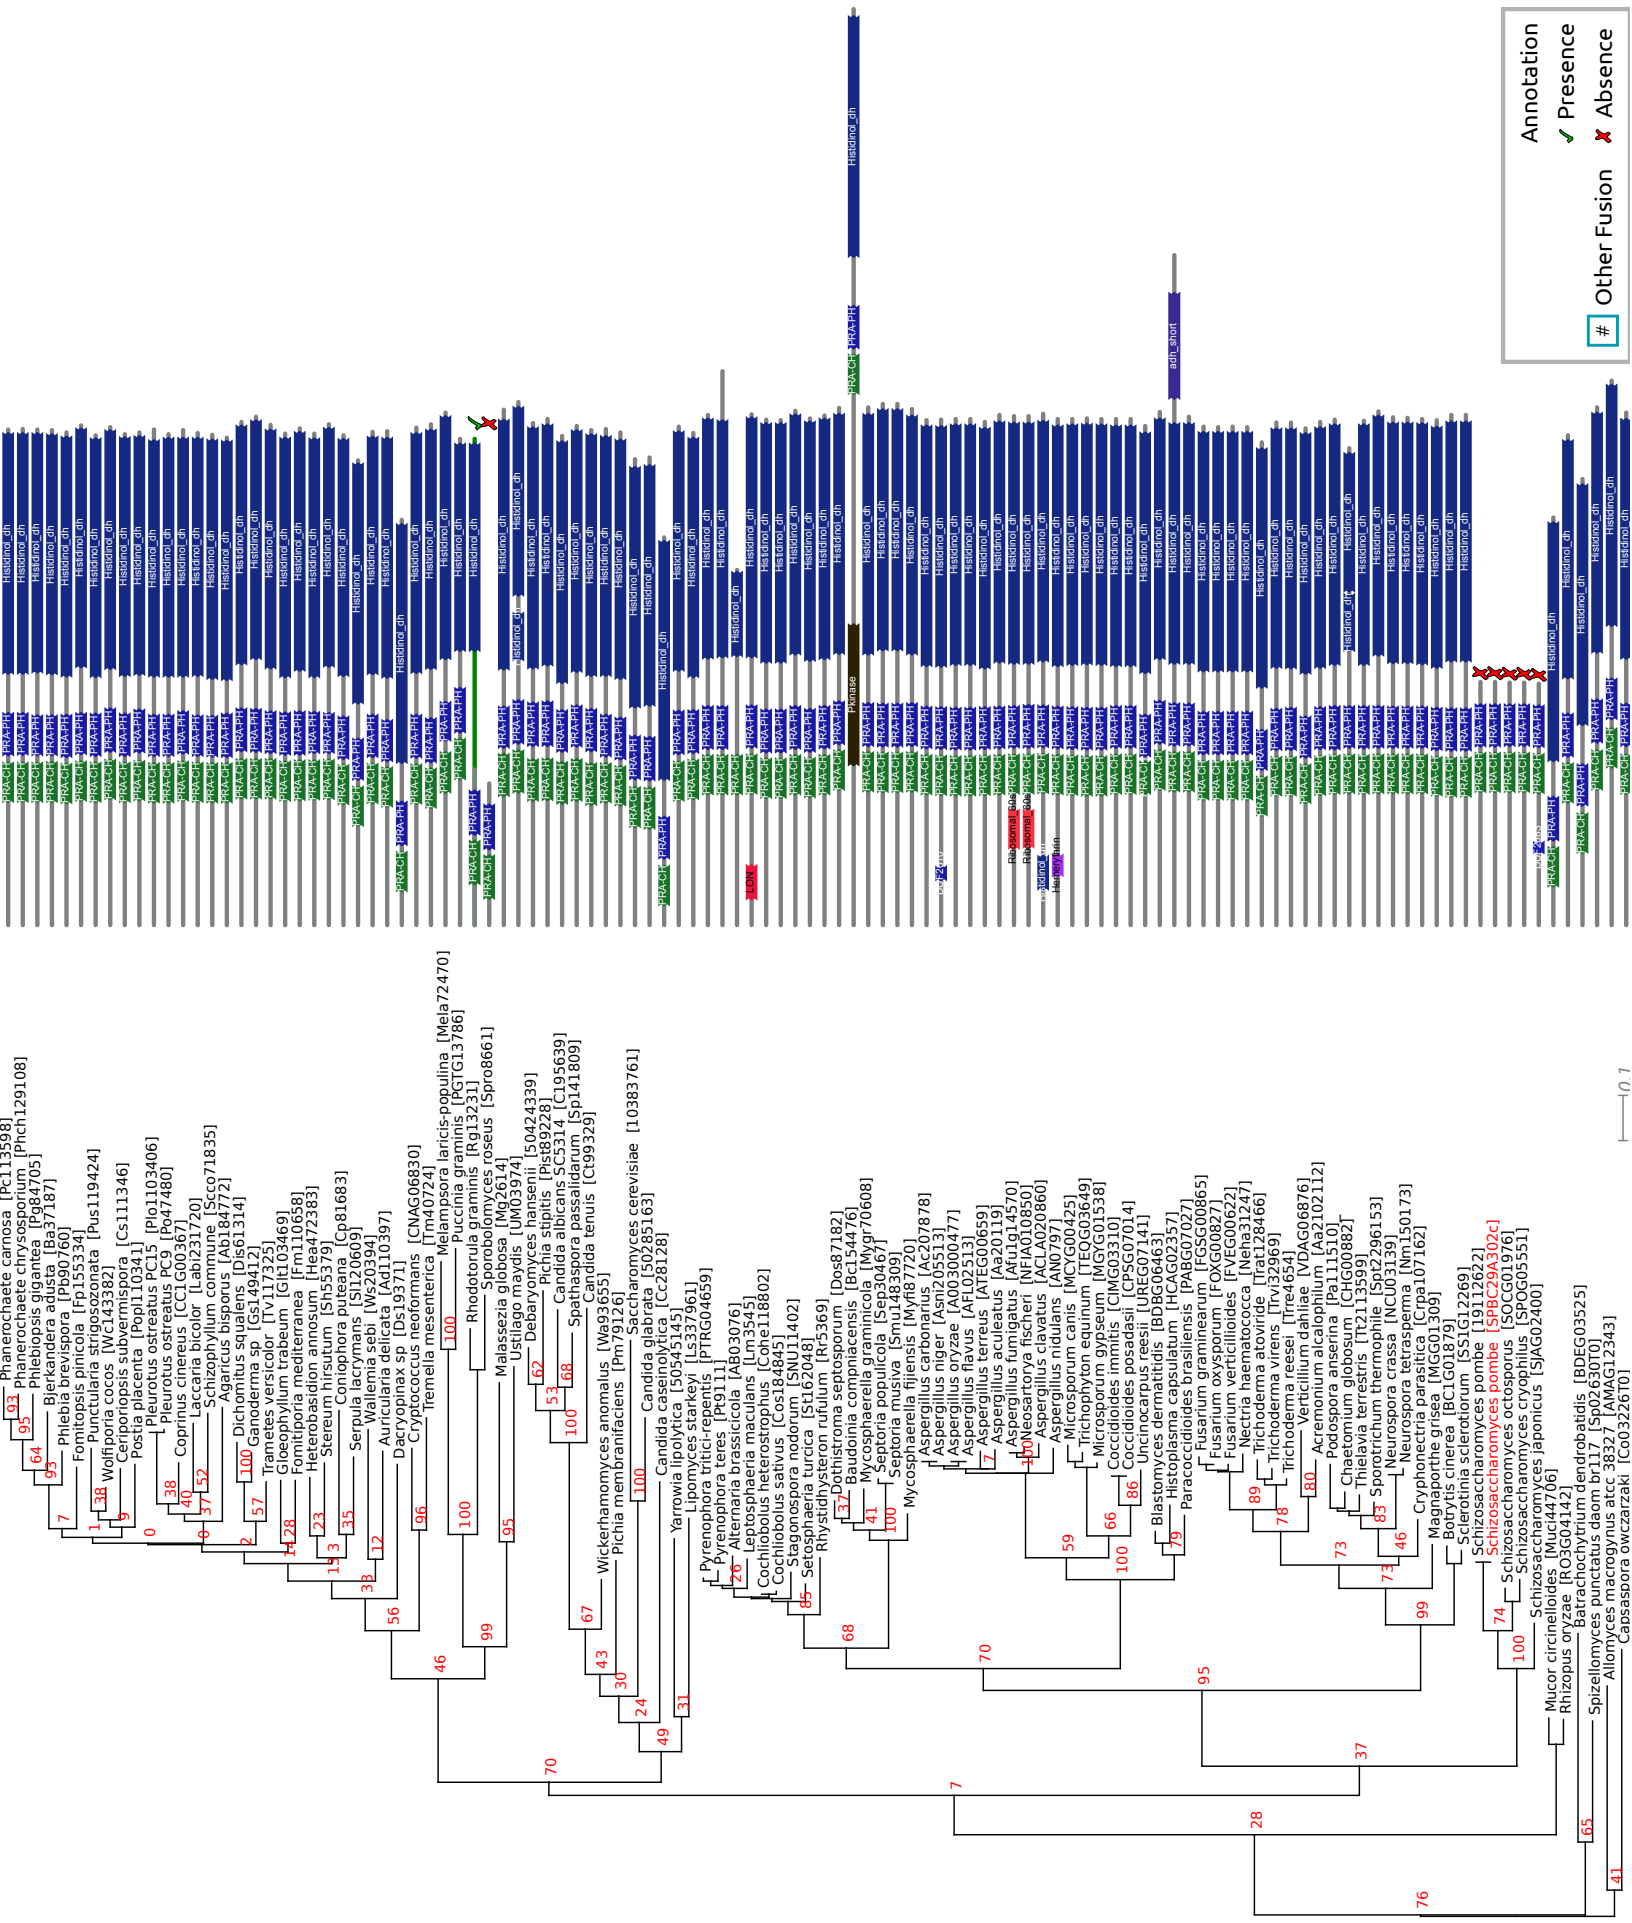

**Annotation**

- ✓ Presence
- ✗ Absence

**#** Other Fusion

10.1

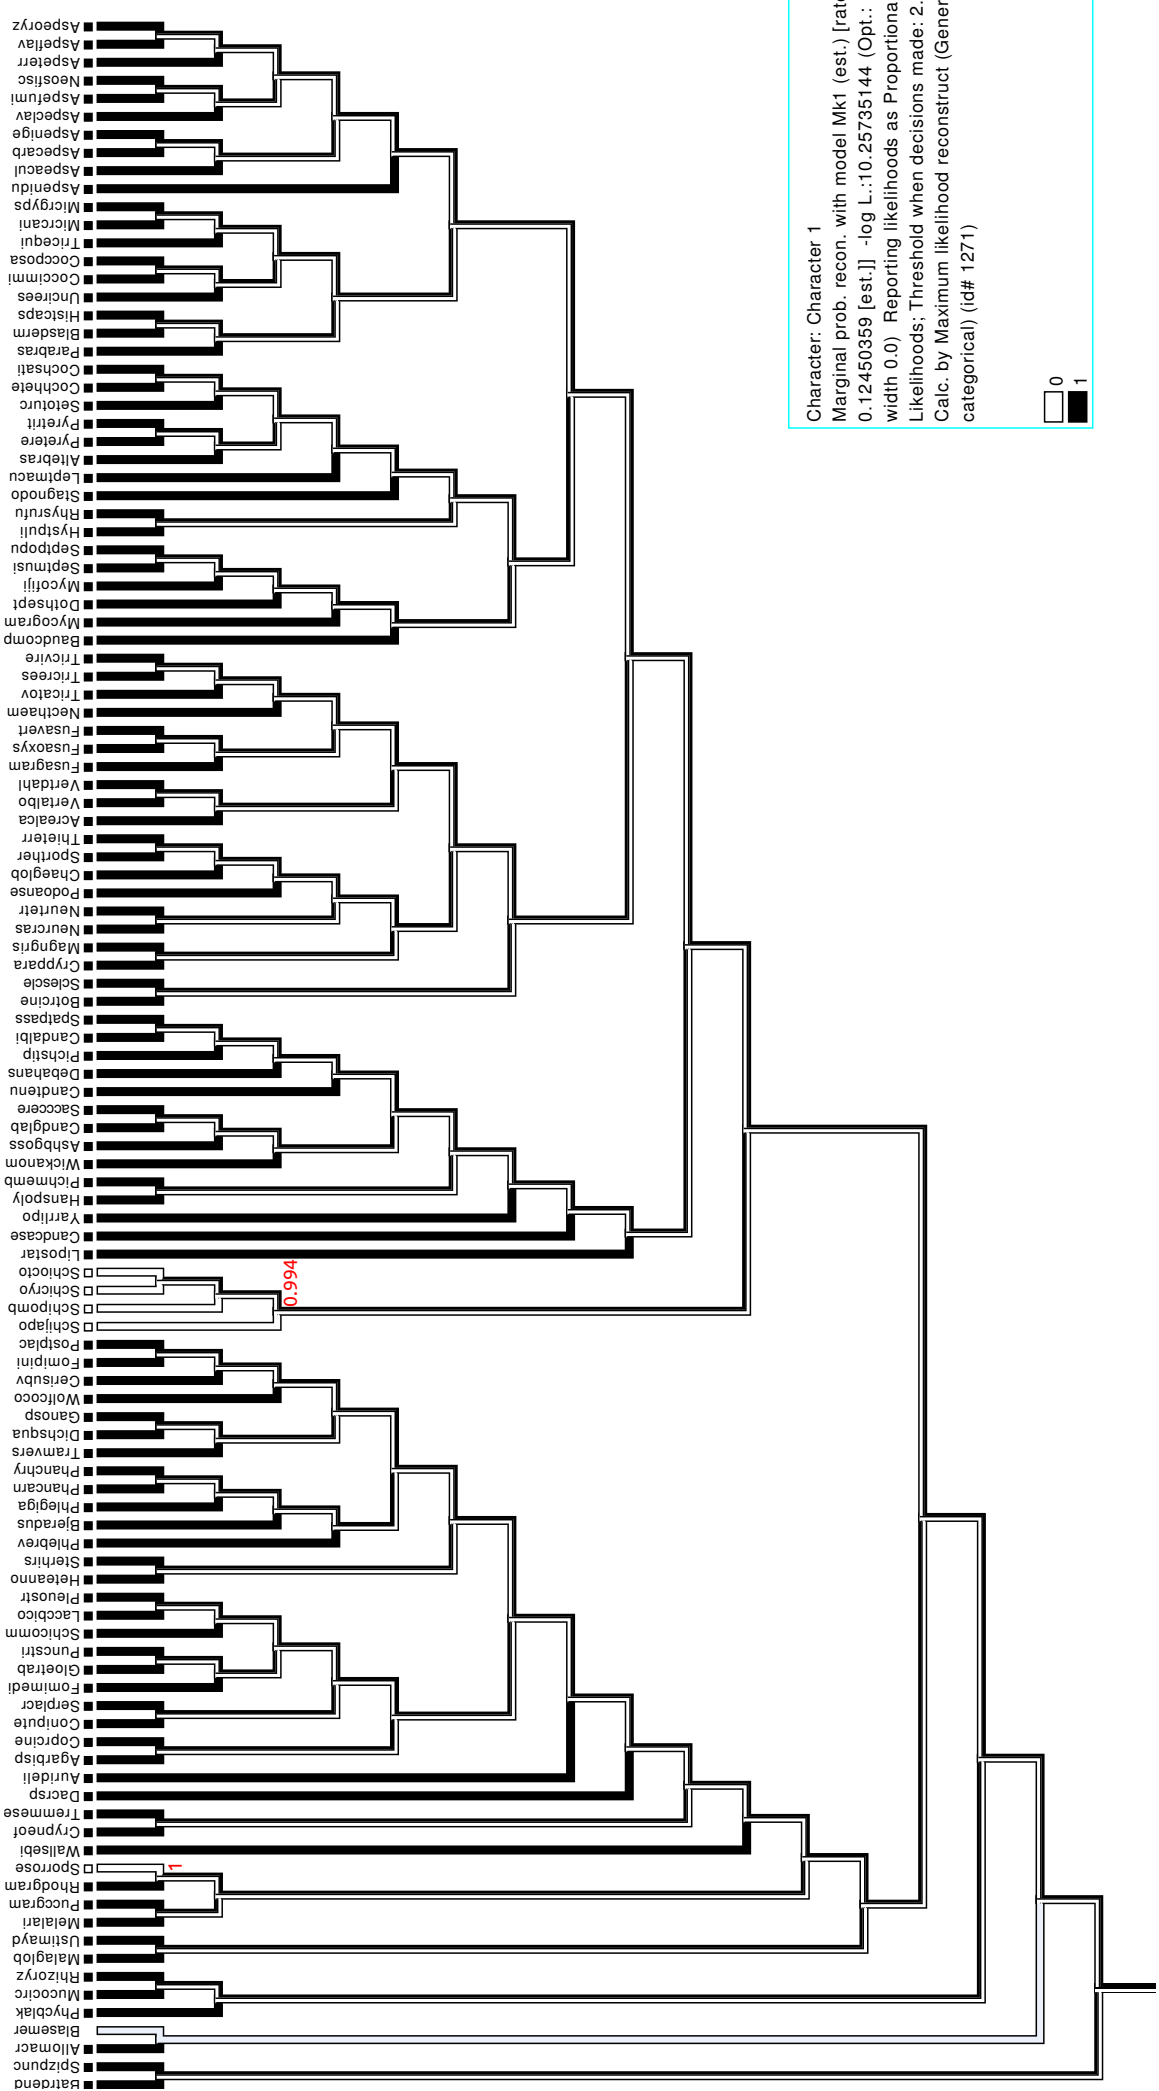

Character: Character 1  
 Marginal prob. recon. with model Mk1 (est.) [rate  
 0.12450359 [est.]] -log L.:10.25735144 (Opt.:  
 width 0.0) Reporting likelihoods as Proportional  
 Likelihoods; Threshold when decisions made: 2.0  
 Calc. by Maximum likelihood reconstruct (Generic  
 categorical) (idf: 1271)

0  
 1



# Putative Fusion 2

September 26, 2012

## 1 Fasta Sequences

These are the unfused sequences identified by fdfBLAST belonging to the putative gene fusion in FASTA format. Accessions may be shortened, but belong to either the taxons individual genome project or NCBI's accession numbering.

```
>lcl|Mc157403 unnamed protein product
MVQKAVLVTGGAGYIGSHTVIELLNAGREVVIYDNLNYSYEAVRRIEQISGKKPHFYKADILDKKALLEVFSRHPIDSV
IHFAGLKAVGESTQIPLDYNNITGTIVLLQAMKEANVKNIVFSSSATVYGEPPVPIPIETSPTDAKSPYGRTKLFVEH
IIRDLCCTAEKDWNAAALLRYFNPAGAHPSGILGENPTGVPNNLMPYFSQVAIGKREYLSVFGNDYPTRDGTCIRDYIHVVD
LAEGHLAALKKLEDNPGCVEYNLGTGVGSTVLEMVHAFQKAVGRELPYKIAPRRPGDVPDLTADPAKANKELGWKVKFSL
EDACASLWNWQSKNPEGLEGYPSEAPSECVINYL
>lcl|Mc156734 unnamed protein product
MPVTKLTIAPGVDQYTLINKSKTLAVMVLTYGAVISHVLTDPDKTGAVRDVVLGFDDFESYKNPANPYFGAVVGRYGNRIG
KGQFTVDGKDYQLAINNGPNALHGGLEGFDKRIWTATVVSEEPASVRLELVSPDGDQGYPGTVTTQLTYTVDNDELILE
YHATTDKDTVINLNTNHSYFNLSGVELNPNILDHRVTMTDEVKAVLECDGDCLPTGKVLWSWSEVPWMNFSGENAGKPIGAR
LENLQGTRGYDHPYVIHSDYKTDAGLPLRKAADVSPDTGIELEFSTTEPAFQFYTGWIASDKMTAKKDQAGAKIGPA
SGFCLEASRNPDSPNKPDRSATLLQKDGVSQKTVYAFHARLD
```

## 2 Annotated Phylograms

All trees were generated from an initial run of Darren's Orchard pipeline against 139 taxa (Table S1), using the above corresponding un-fused sequences as BLAST seeds. The alignments were then checked for any missing taxa, manually masked and then ProtTest3 was run, please see the Methods section for detail. The final trees were generated by the following command:

```
phym1 -i alignment_file -d aa -b 100 -m model -c 8 -v invariant_sites -s BEST --quiet
-a gamma
```

Styling and annotation was made possible by Dendroscope and Inkscape.

## 3 Mesquite Cladogram

This tree is the 68-gene concatenated phylogeny (Fig. 1), with the presence of a fusion (black), presence of a fission (white), and absent/undetermined (grey) status of gene fusion characters plotted on to it using a "1/0/-" nexus-style data matrix. We used the program 'Mesquite' to calculate proportional likelihoods based on either an "Mk1" or "Assym. 2 param model." (see Table S4) of character change across the fungal phylogeny (Fig. 1). This allowed for a proportional likelihood of the position of the fusion/fission to be calculated.

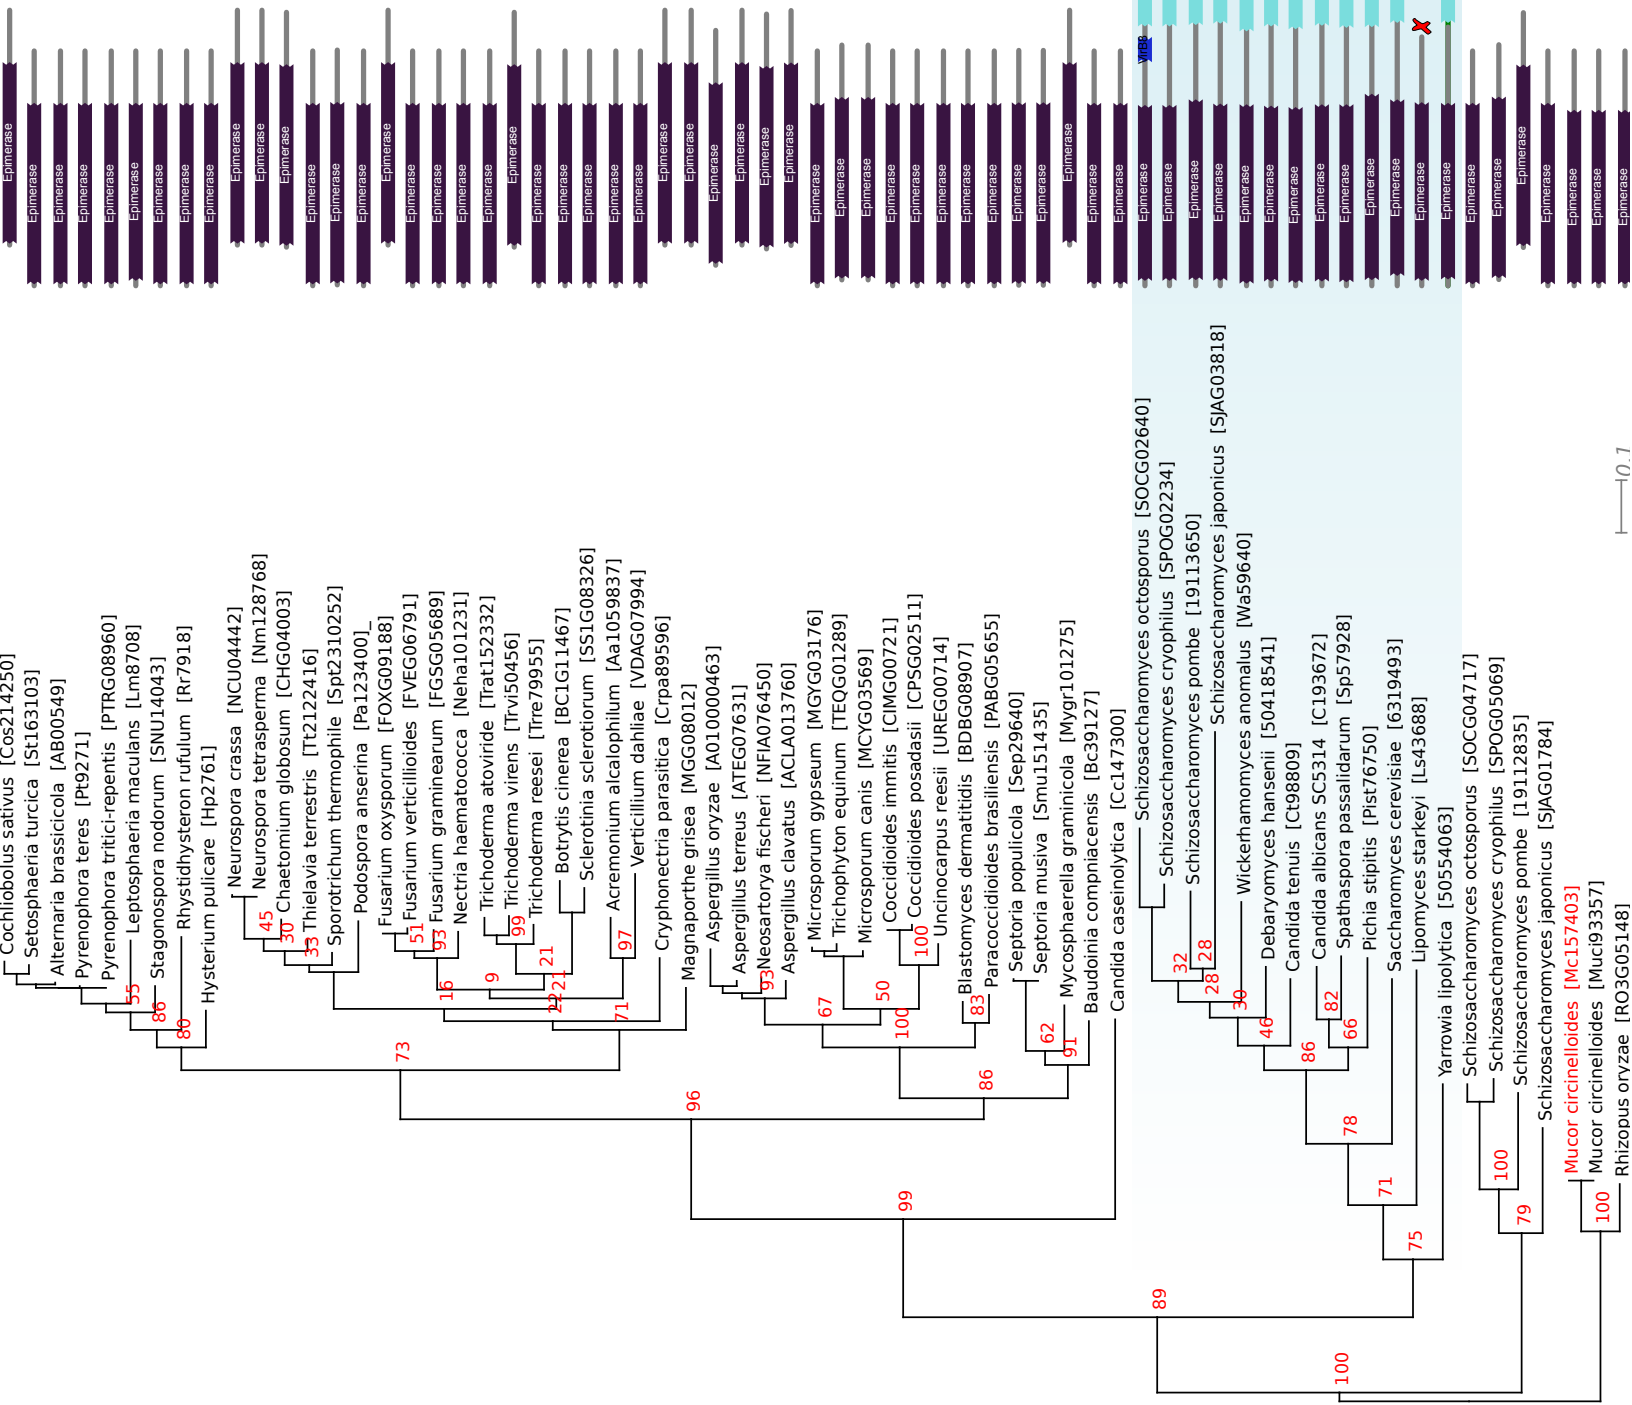

This revision not counted as main species tree (Figure 1) suggests *Lipomyces* branches before this fusion event.

**Annotation**

- ✓ Presence
- ✗ Absence
- # Other Fusion

—|0.1

Annotation  
 ✓ Presence  
 ✗ Absence  
 # Other Fusion

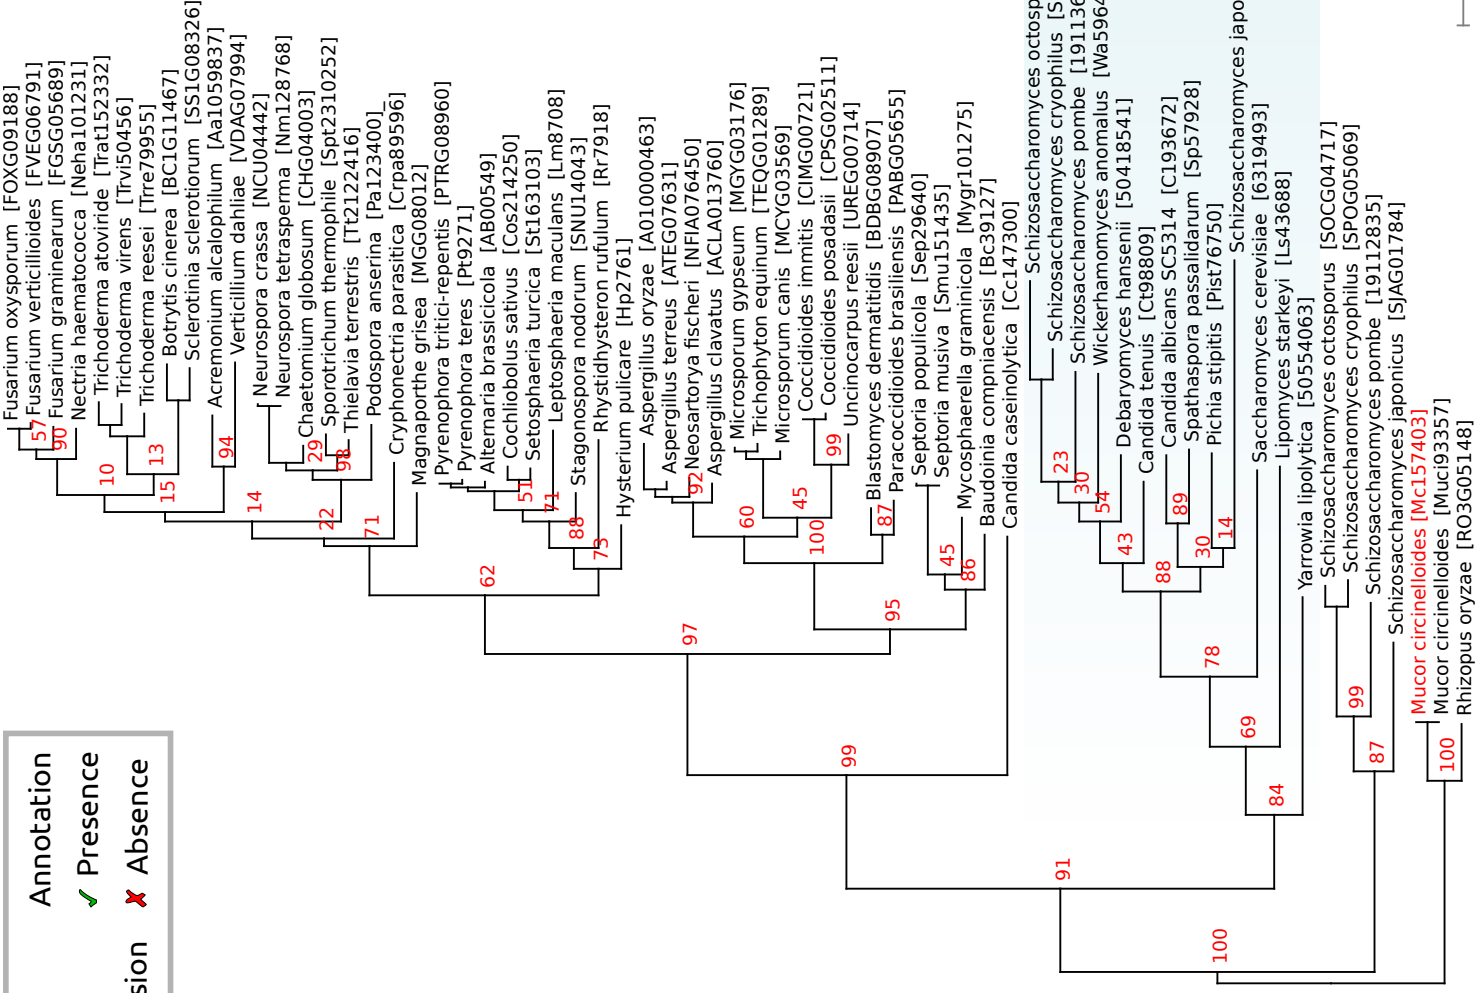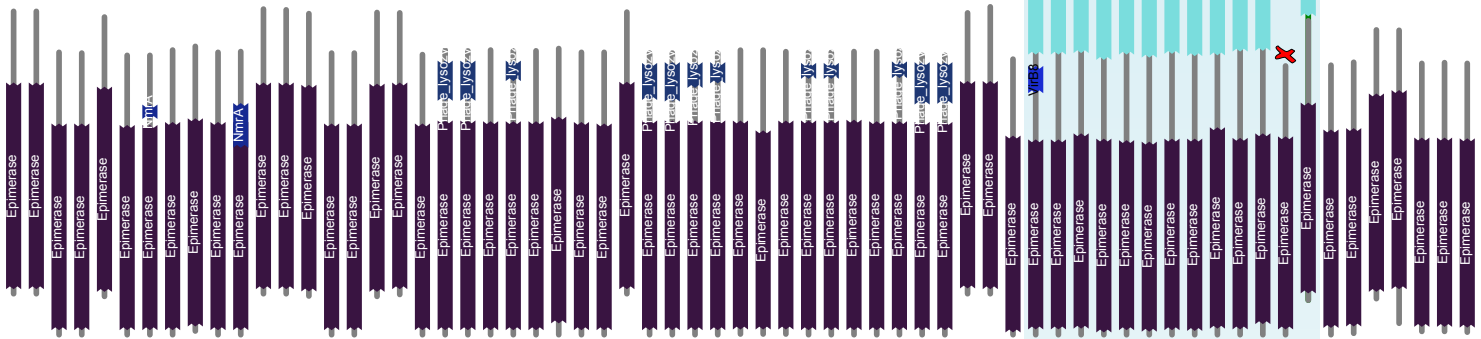

This revision not counted as main species tree (Figure 1) suggests *Lipomyces* branches before this fusion event.

—|—0.1

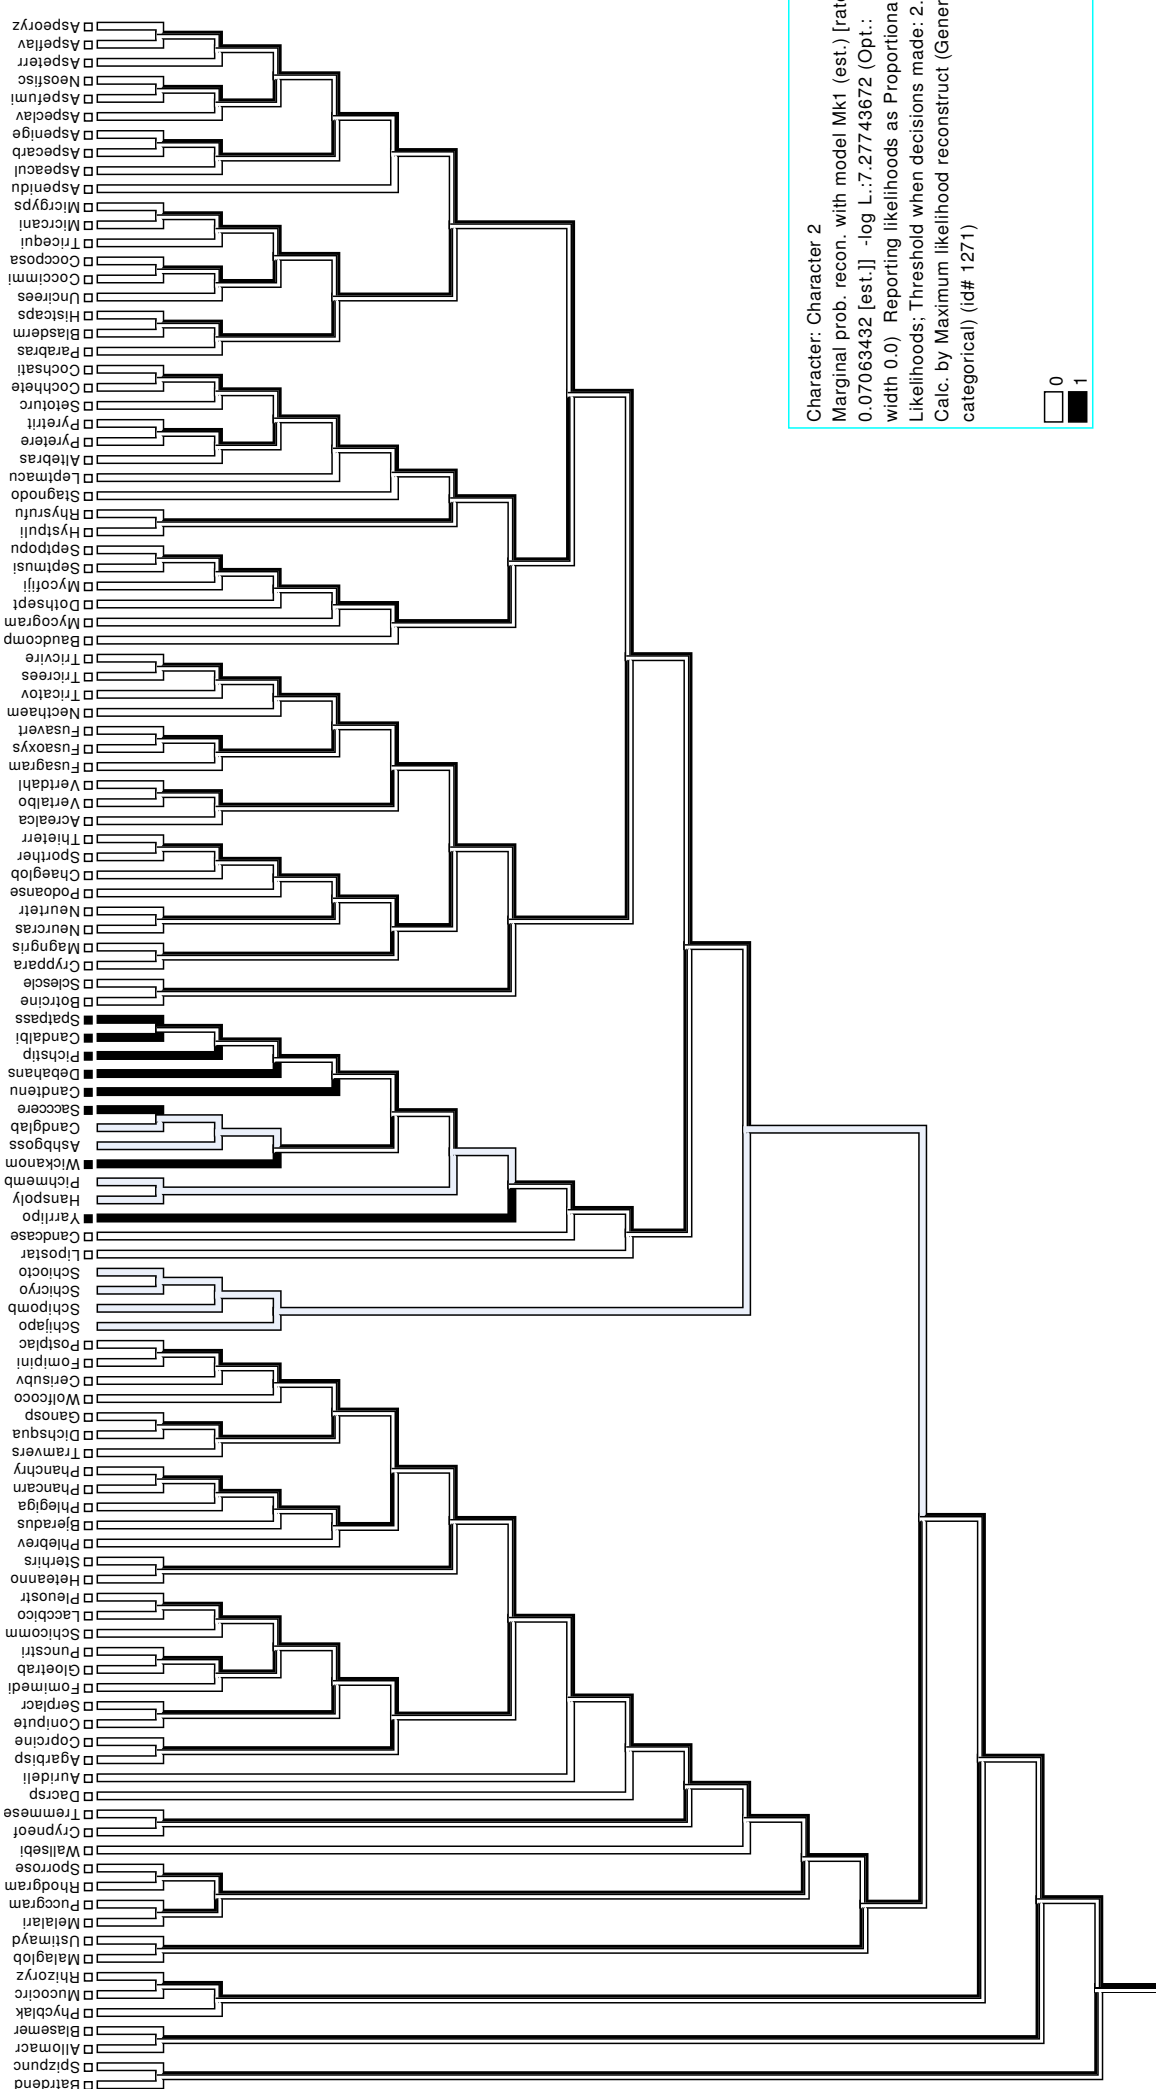

Character: Character 2  
 Marginal prob. recon. with model Mk1 (est.) [rate  
 0.07063432 [est.]] -log L.: 7.27743672 (Opt.:  
 width 0.0) Reporting likelihoods as Proportional  
 Likelihoods; Threshold when decisions made: 2.0  
 Calc. by Maximum likelihood reconstruct (Generic  
 categorical) (idf: 1271)

0  
 1

# Putative Fusion 3

September 26, 2012

## 1 Fasta Sequences

These are the unfused sequences identified by fdfBLAST belonging to the putative gene fusion in FASTA format. Accessions may be shortened, but belong to either the taxons individual genome project or NCBI's accession numbering.

```
>lcl|CC1G06724 unnamed protein product
MSISVPTILLTNDGPPHPKESPYVLGLYRHLTERLGWNVKVVLPSSQKSWIGRYFYFPREDGNGEQSPKSRPLKPGELAE
WILLDGTATCANVALHNLYPGQIDLVVSGPNLGRNTSAAFALSSGTIGAALSSSLSKVRSIALSYGTVVHPTPTTYFEP
AHRIGCRIIQHLWHNWGSDDCGLRNGEVDLYSVNIPLIEDILSEEGLKVYWTMWRNSYGRLFKDVSSRRKSIDGATVNP
AGPDAATSPQTAVKPIDEEGLLFKWAPEMRGLIQPLSDELPGSDAYAIHTGSISVTALRACFAEPPTSVDVPLRQIKL
>lcl|CC1G03660 unnamed protein product
MASSFSAVVVWPNAPLTDLSLVKKALSQFHPKYLQFPEDDDAIVQWSSYDVIDHELLLTRPSHVLASSYIFRKALIRKHF
LSRIVHAYCIKNPDTILKTAFLTYELEISFADELDEMWTDELWELGERLDSDDTWILKPGMANRGMGIRLFDSKDQLQ
QIFEDFEEEDDTDDDDTKGNDTSVVTSQLRHFIIQEYIPDPLLFDPREVSQEKNEINCLQGHKFHLRVYCVATGALKLY
LYDRILALFASLPYGPPTFEVIEPDEPPVINLQHHLTNTSLQAEKGEENVRLLELDGQCILSGDGEHGKFTSADIKFLI
NQMGVLSSETFKAALENPIHFQAIPNAFELYGVDFLVSHSPNSPSPFSVKLLEINAEPPIELTGPRLTWILEDLFKSIAE
VSIKPPFAPNKENDWPVGETRHLLKCLDVSVMRFD
```

## 2 Annotated Phylograms

All trees were generated from an initial run of Darren's Orchard pipeline against 139 taxa (Table S1), using the above corresponding un-fused sequences as BLAST seeds. The alignments were then checked for any missing taxa, manually masked and then ProtTest3 was run, please see the Methods section for detail. The final trees were generated by the following command:

```
phym1 -i alignment_file -d aa -b 100 -m model -c 8 -v invariant_sites -s BEST --quiet
-a gamma
```

Styling and annotation was made possible by Dendroscope and Inkscape.

## 3 Mesquite Cladogram

This tree is the 68-gene concatenated phylogeny (Fig. 1), with the presence of a fusion (black), presence of a fission (white), and absent/undetermined (grey) status of gene fusion characters plotted on to it using a "1/0/-" nexus-style data matrix. We used the program 'Mesquite' to calculate proportional likelihoods based on either an "Mk1" or "Assym. 2 param model." (see Table S4) of character change across the fungal phylogeny (Fig. 1). This allowed for a proportional likelihood of the position of the fusion/fission to be calculated.

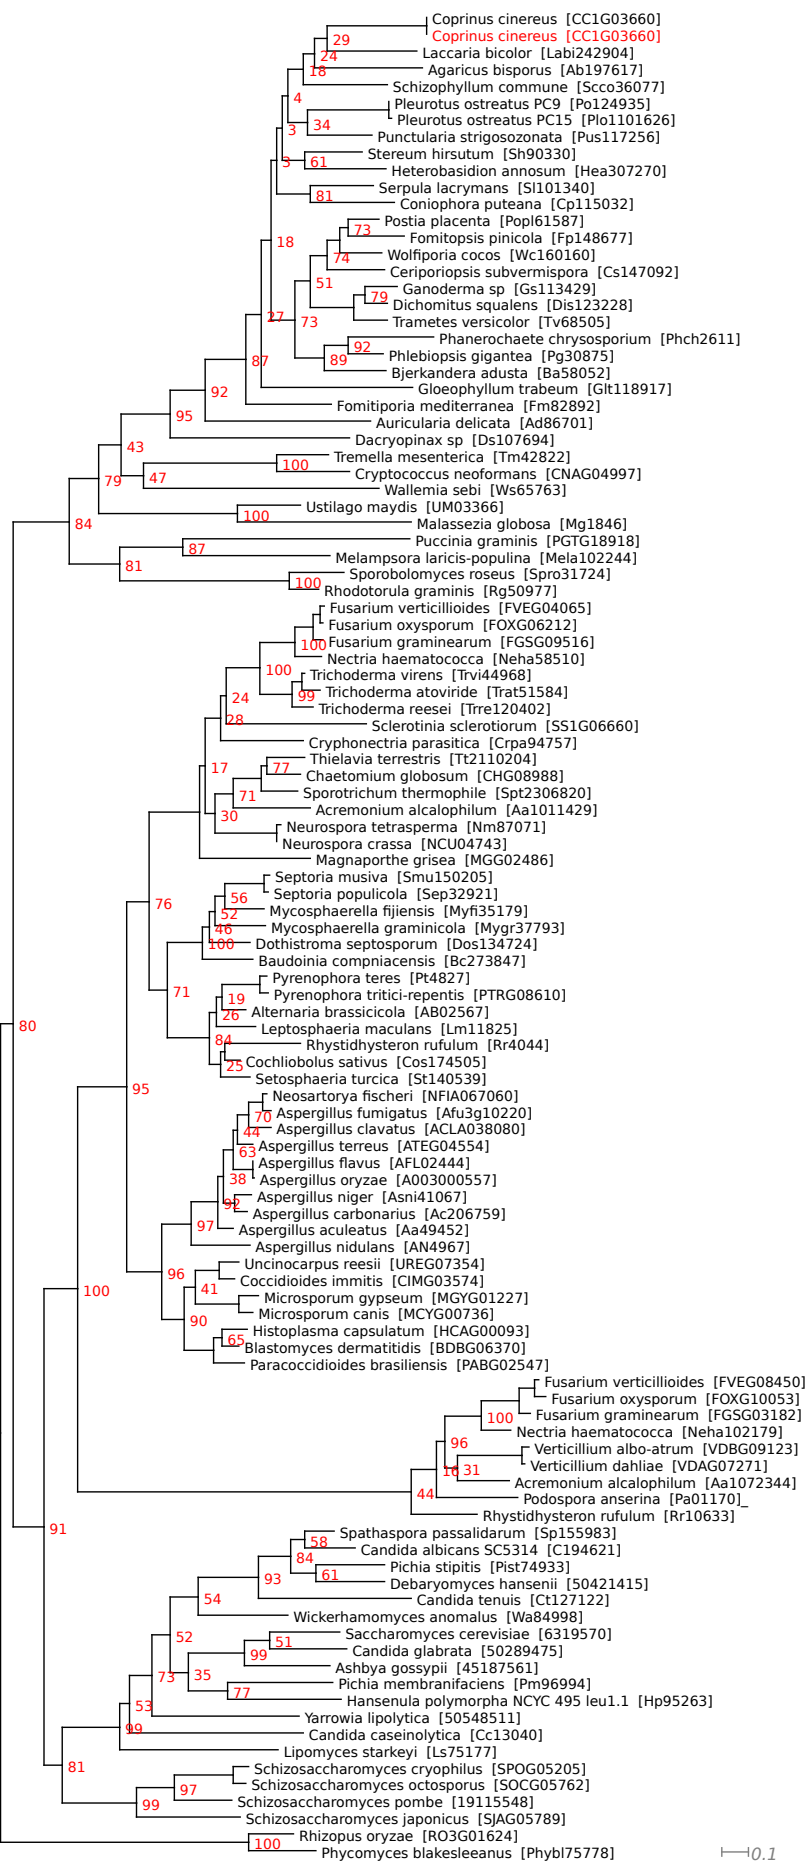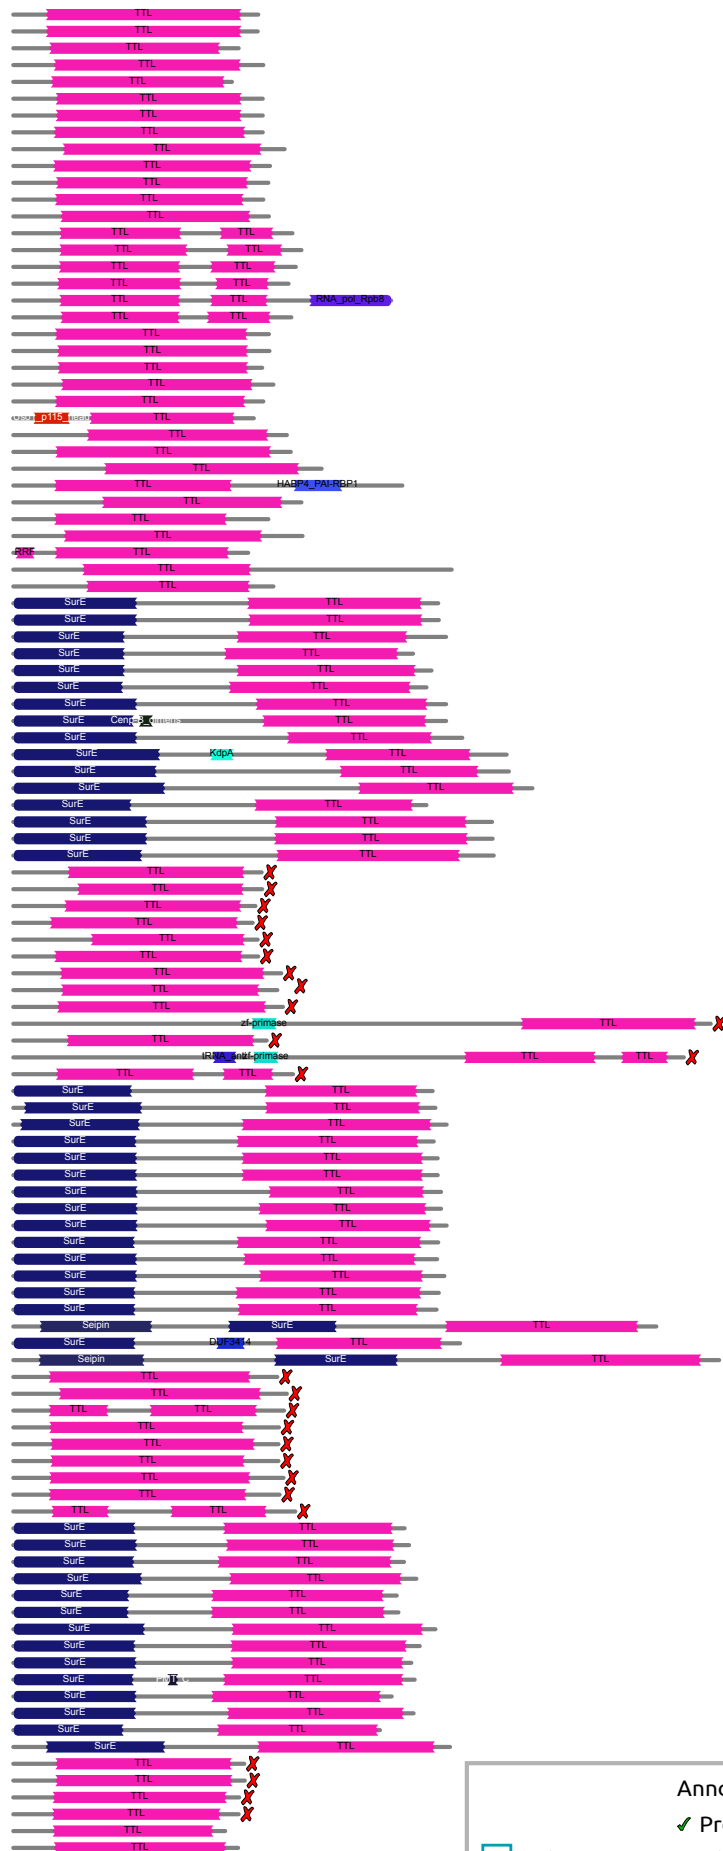

Annotation

✓ Presence

# Other Fusion

✗ Absence

58

58

0.1

Annotation  
 ✓ Presence  
 ✗ Absence  
 # Other Fusion  
 # 57

TTL tree used mainly to identify fissions/reversions as it has better bootstrap resolution.

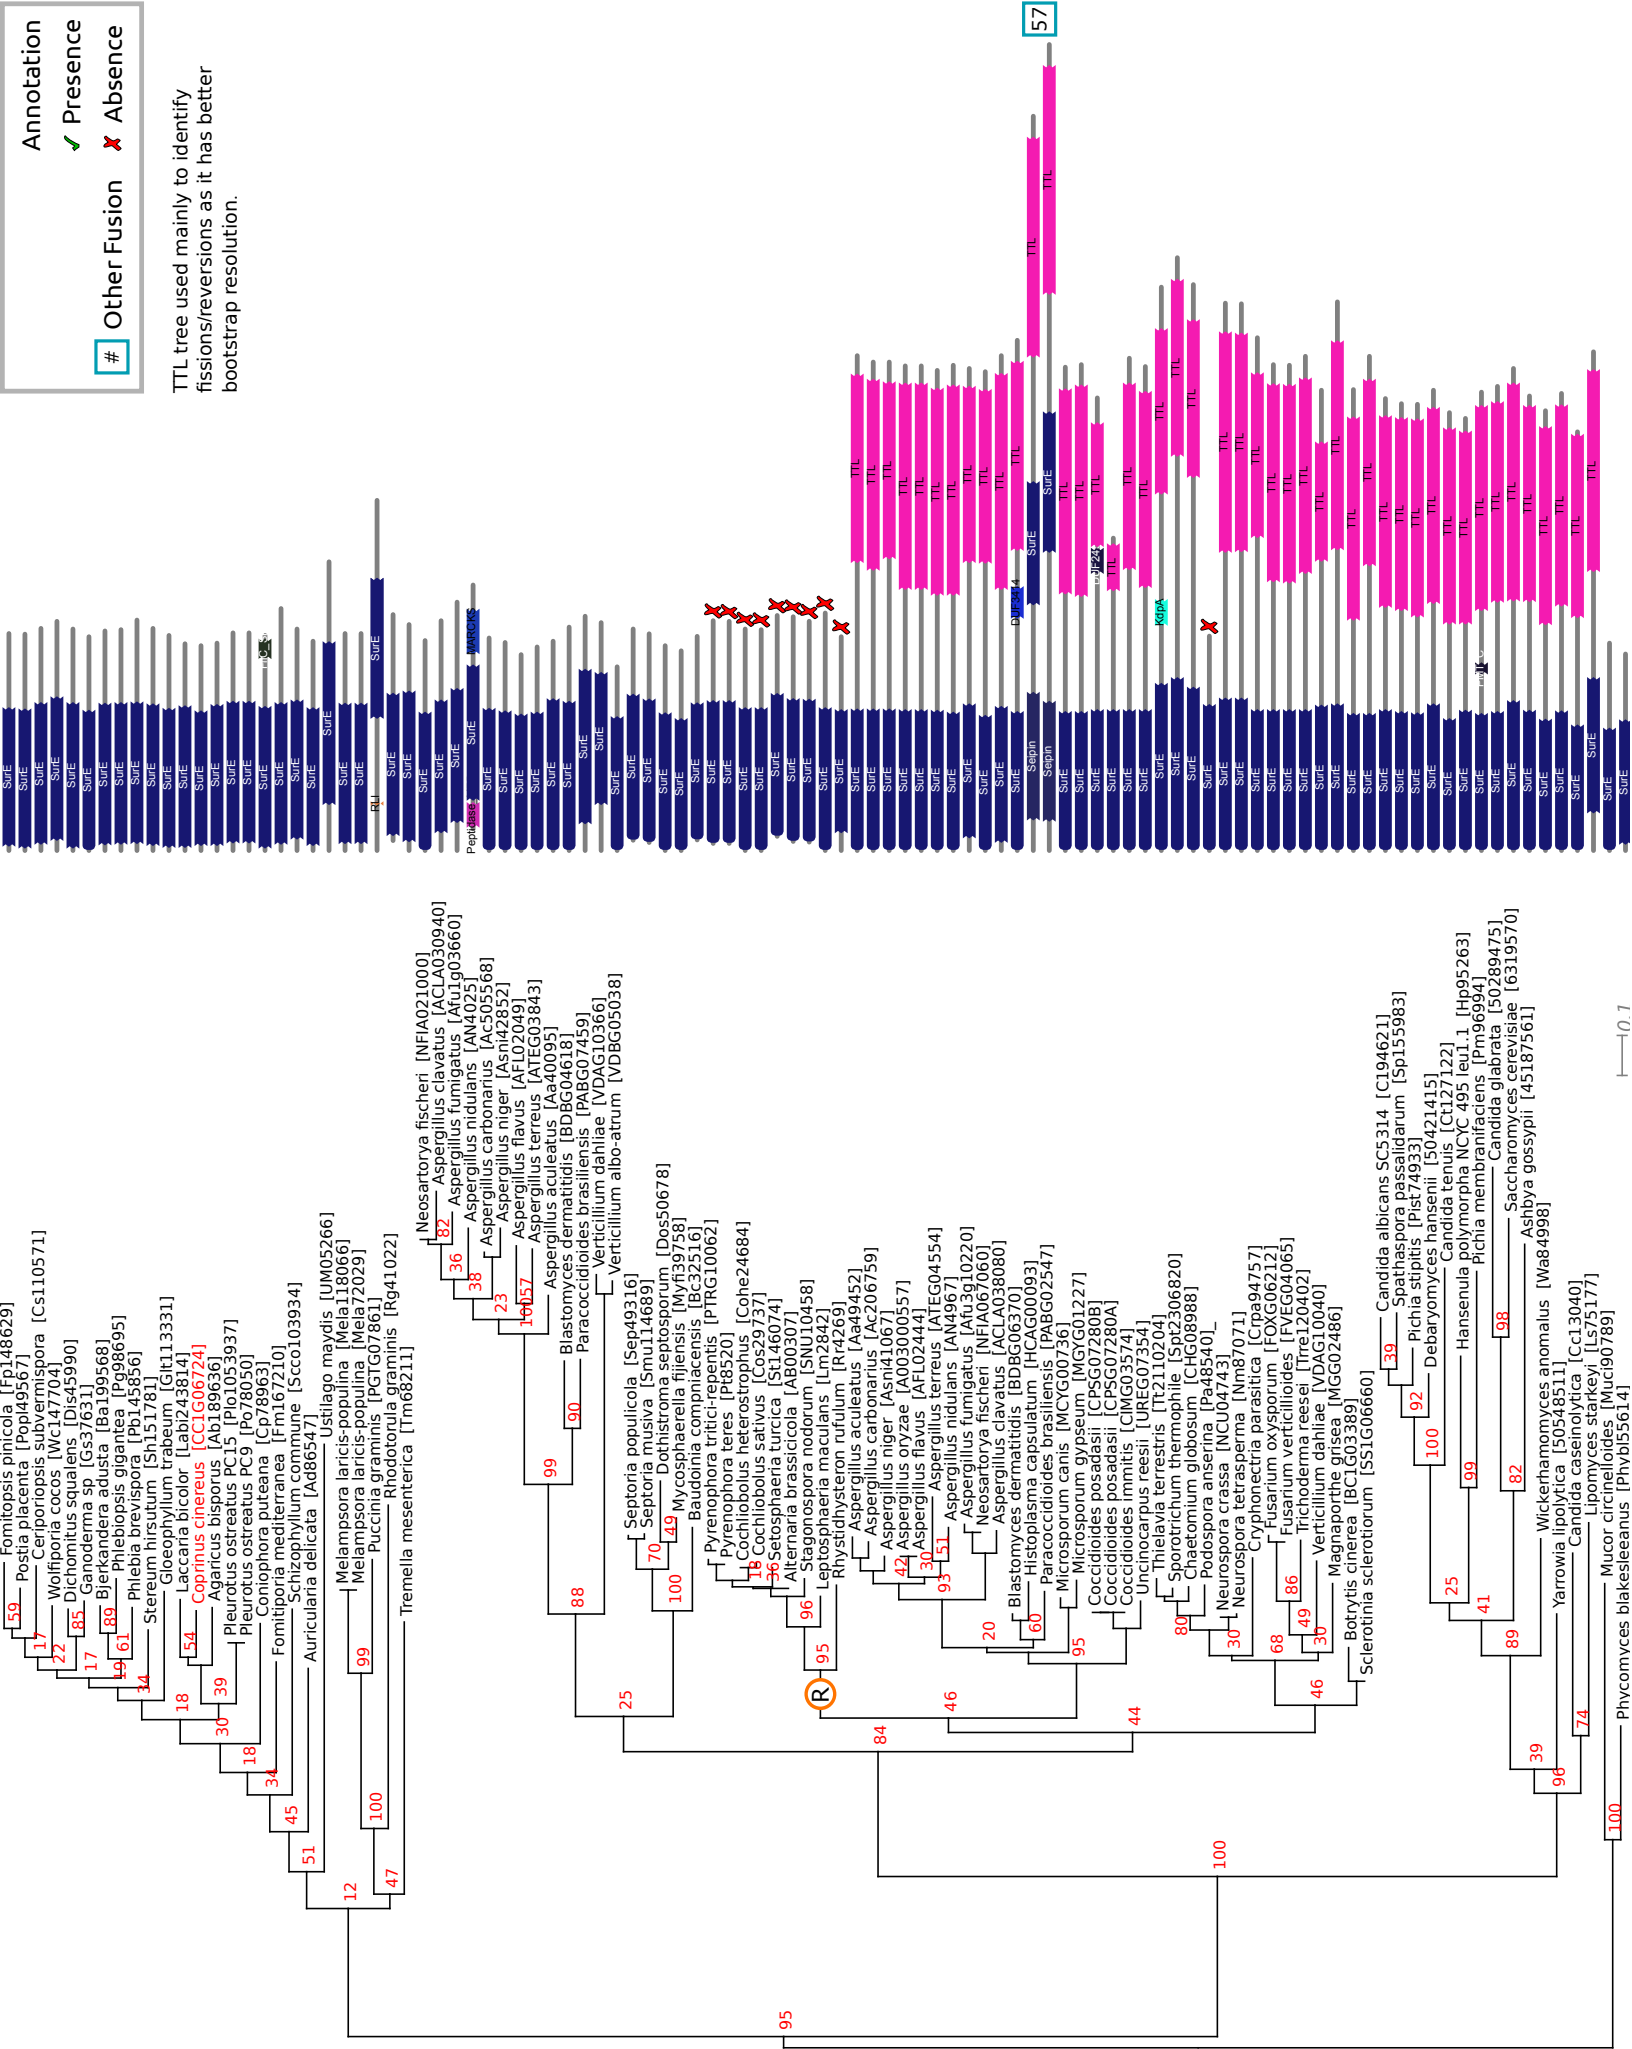

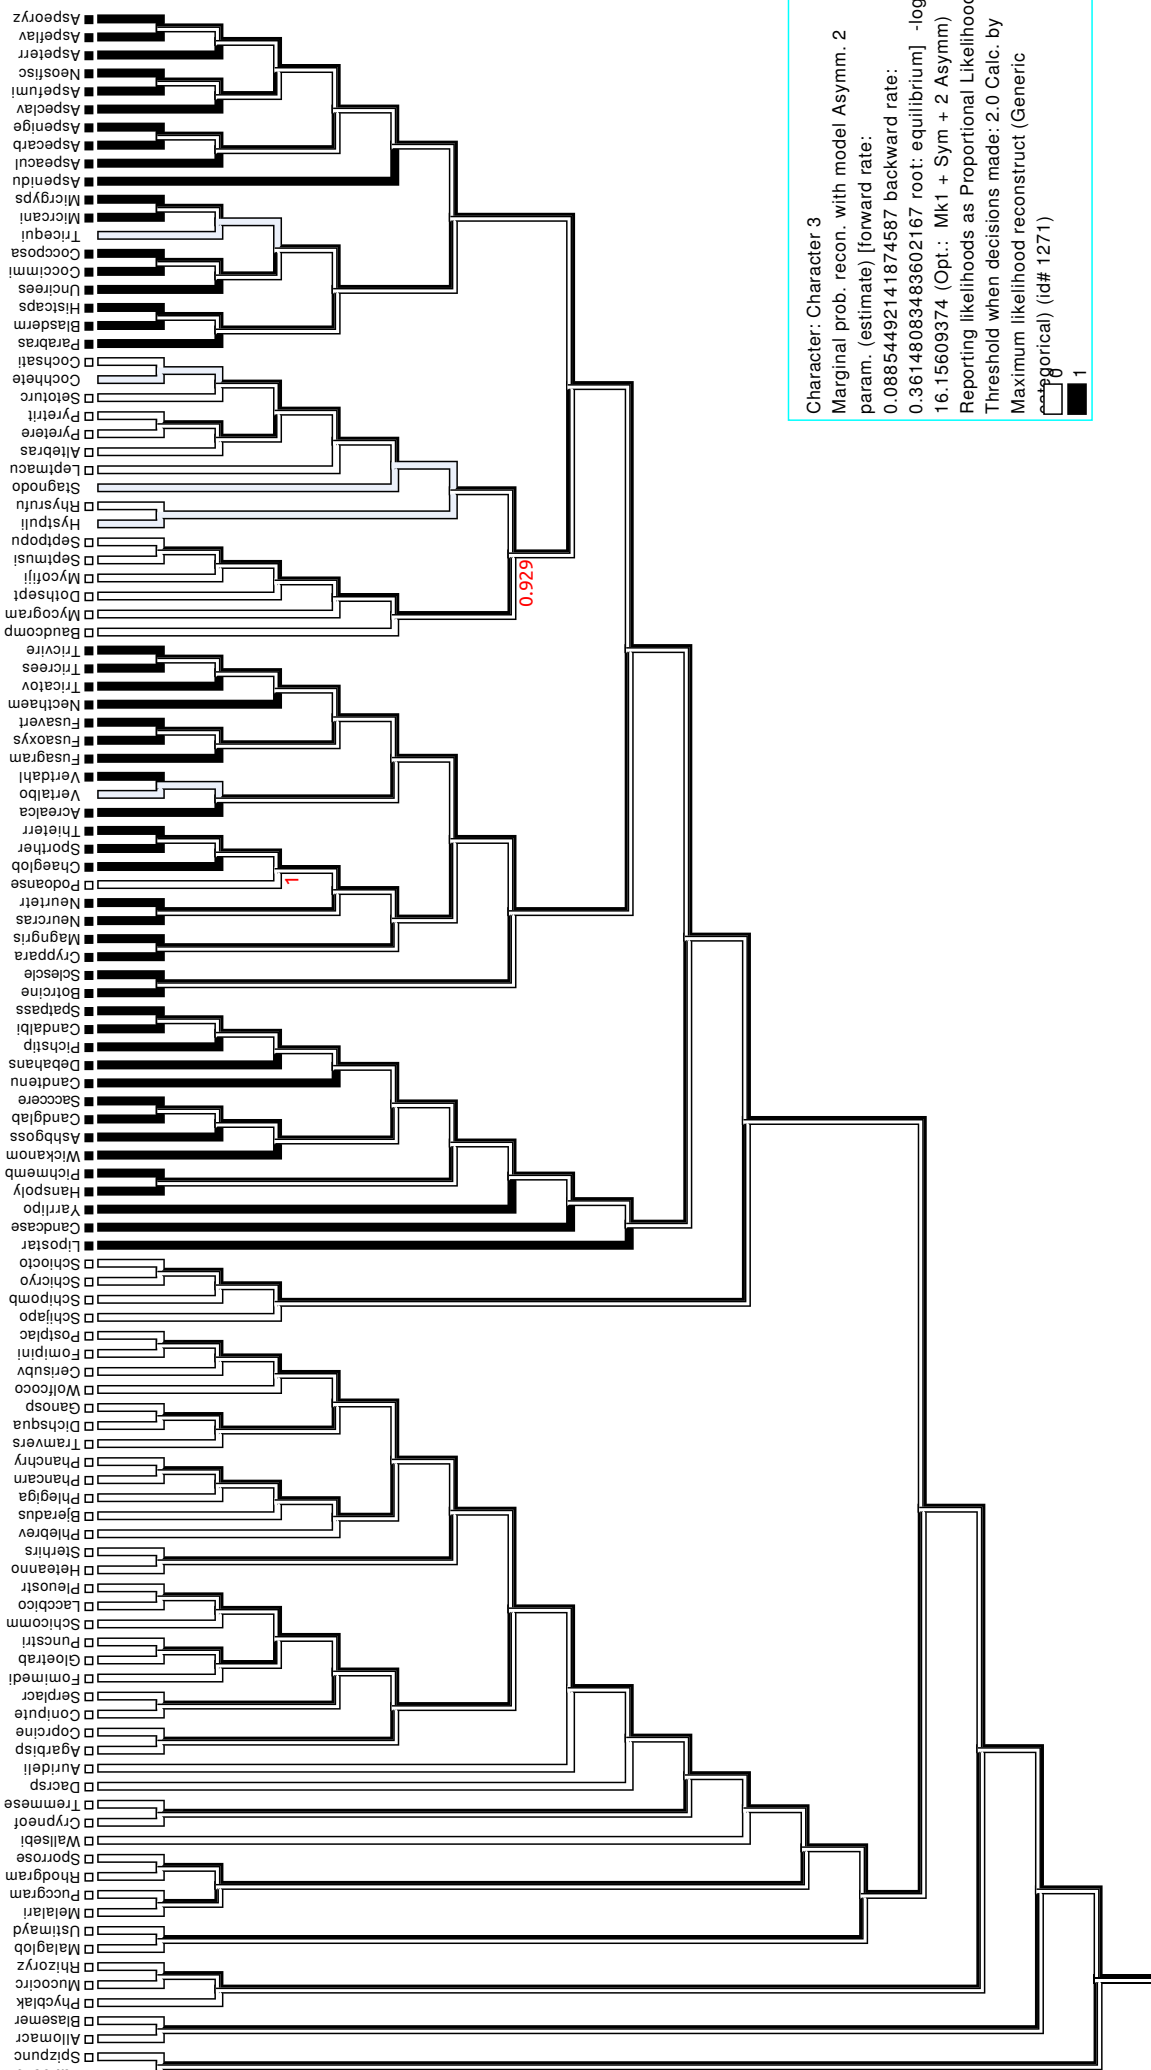

- Rattand
- Spizunc
- Allomacr
- Blasemer
- Phyciak
- Mucocitc
- Rhizoryz
- Malaglob
- Ustimayd
- Melatari
- Puccogram
- Rhodgram
- Sporose
- Wallsebi
- Crypneot
- Tremese
- Dacrsp
- Aurideli
- Agarbispp
- Coprine
- Conpute
- Serplac
- Formimedi
- Gloetrab
- Punctri
- Schicom
- Laccbico
- Pleuost
- Heteanno
- Steritrs
- Phlebrev
- Bjeradus
- Phlegiga
- Phancarn
- Phanchry
- Tamvers
- Dichsqua
- Ganosp
- Wollcoco
- Cerisubv
- Fompmi
- Postplac
- Schiap
- Schipom
- Schicyo
- Lpostar
- Candcase
- Yarrilpo
- Hanspoly
- Pichmamb
- Wickanom
- Ashbgoss
- Candglab
- Saccere
- Candenu
- Debahans
- Pichstip
- Candalbi
- Spapass
- Botine
- Schesle
- Cryppara
- Magngris
- Neurcras
- Neurtr
- Podoanse
- Chaeglob
- Sporthr
- Thieterr
- Acrealca
- Vertalbo
- Verdahl
- Fusaqram
- Fusaoxyx
- Fusavert
- Nechtahem
- Tricatov
- Trices
- Tricvre
- Baudcomp
- Mycoqram
- Dothsept
- Mycoliji
- Sepimusl
- Seppopu
- Hystpuli
- Rhystrfu
- Stagnodo
- Lepmaco
- Aliebras
- Pyete
- Pyetrit
- Setoturc
- Cochete
- Cochcati
- Parabras
- Blasderm
- Histcaps
- Undreess
- Cocclmml
- Coccposa
- Micrcant
- Micryps
- Aspendu
- Aspeacu
- Aspecab
- Aspenige
- Aspectal
- Aspetum
- Neostisc
- Aspeterr
- Aspetlav
- Aspeoryz



# Putative Fusion 4

September 27, 2012

## 1 Fasta Sequences

These are the unfused sequences identified by fdfBLAST belonging to the putative gene fusion in FASTA format. Accessions may be shortened, but belong to either the taxons individual genome project or NCBI's accession numbering.

```
>lcl|AMAG_11004 unnamed protein product
MSWTKTPVRLTLSTVFGSLADCCLPQTGLRRVTPYYYYLYKTHAKQRWLGME LLAVFDKEFQDRQPGYYVRAHCRHRRRFP
RSIPLALTIPTNPLQKKAIDSGAIQVNHQSVPTTYLLKNNDLITHRNHRHEPPVTSAPITILARTPHFVVVNKPASIPVH
PSGRYRHN SVLHIVRRALGTSSTD LVGPPLYALHRLDRLTSGVLILCSDRARIGKLSKQFAAQVVGKSYLCVVAGEFPAG
TTTVDAPIMVVSHKLG LNSVHPDGK PSTTHFDLLATDGTRSLVRARPVTGRTHQIRVHLRHLGFPIANDPLYNNPNHRHV
KAEREKAAAAA VAESNSGEDAT TDSAGAEGTPGATDDETA AWVA AVAAETA SRDAL TVTGQCTECGTDLYADPPHDHRLI
YLHAYEYAVRMSLGELDAPSEYITYDEATKTTTVRTPLEWATDWP GFDPRVLDVVPSANVDEALQQS
>lcl|AMAG_02082 unnamed protein product
MSTTTNAADAADRYWLRHAITIAHRSAPVPSAYCVGAVLVSRTSTILPRASDAITPPDAPTNQIVLATGFSRELPGNTHA
EEVCLLKL PVGTDLAGCTMYTTMEPCSTRLSGRPSCTGRVLD AKVPRVVMGIVEPADL FVKCTGADTLRERGVEVVHIQG
LEEECWAPNRHLRERYDDGRNGAPRDSGAAAADA
```

## 2 Annotated Phylograms

All trees were generated from an initial run of Darren's Orchard pipeline against 139 taxa (Table S1), using the above corresponding un-fused sequences as BLAST seeds. The alignments were then checked for any missing taxa, manually masked and then ProtTest3 was run, please see the Methods section for detail. The final trees were generated by the following command:

```
phym1 -i alignment_file -d aa -b 100 -m model -c 8 -v invariant_sites -s BEST --quiet -a gamma
```

Styling and annotation was made possible by Dendroscope and Inkscape.

## 3 Mesquite Cladogram

This tree is the 68-gene concatenated phylogeny (Fig. 1), with the presence of a fusion (black), presence of a fission (white), and absent/undetermined (grey) status of gene fusion characters plotted on to it using a "1/0/-" nexus-style data matrix. We used the program 'Mesquite' to calculate proportional likelihoods based on either an "Mk1" or "Assym. 2 param model." (see Table S4) of character change across the fungal phylogeny (Fig. 1). This allowed for a proportional likelihood of the position of the fusion/fission to be calculated.

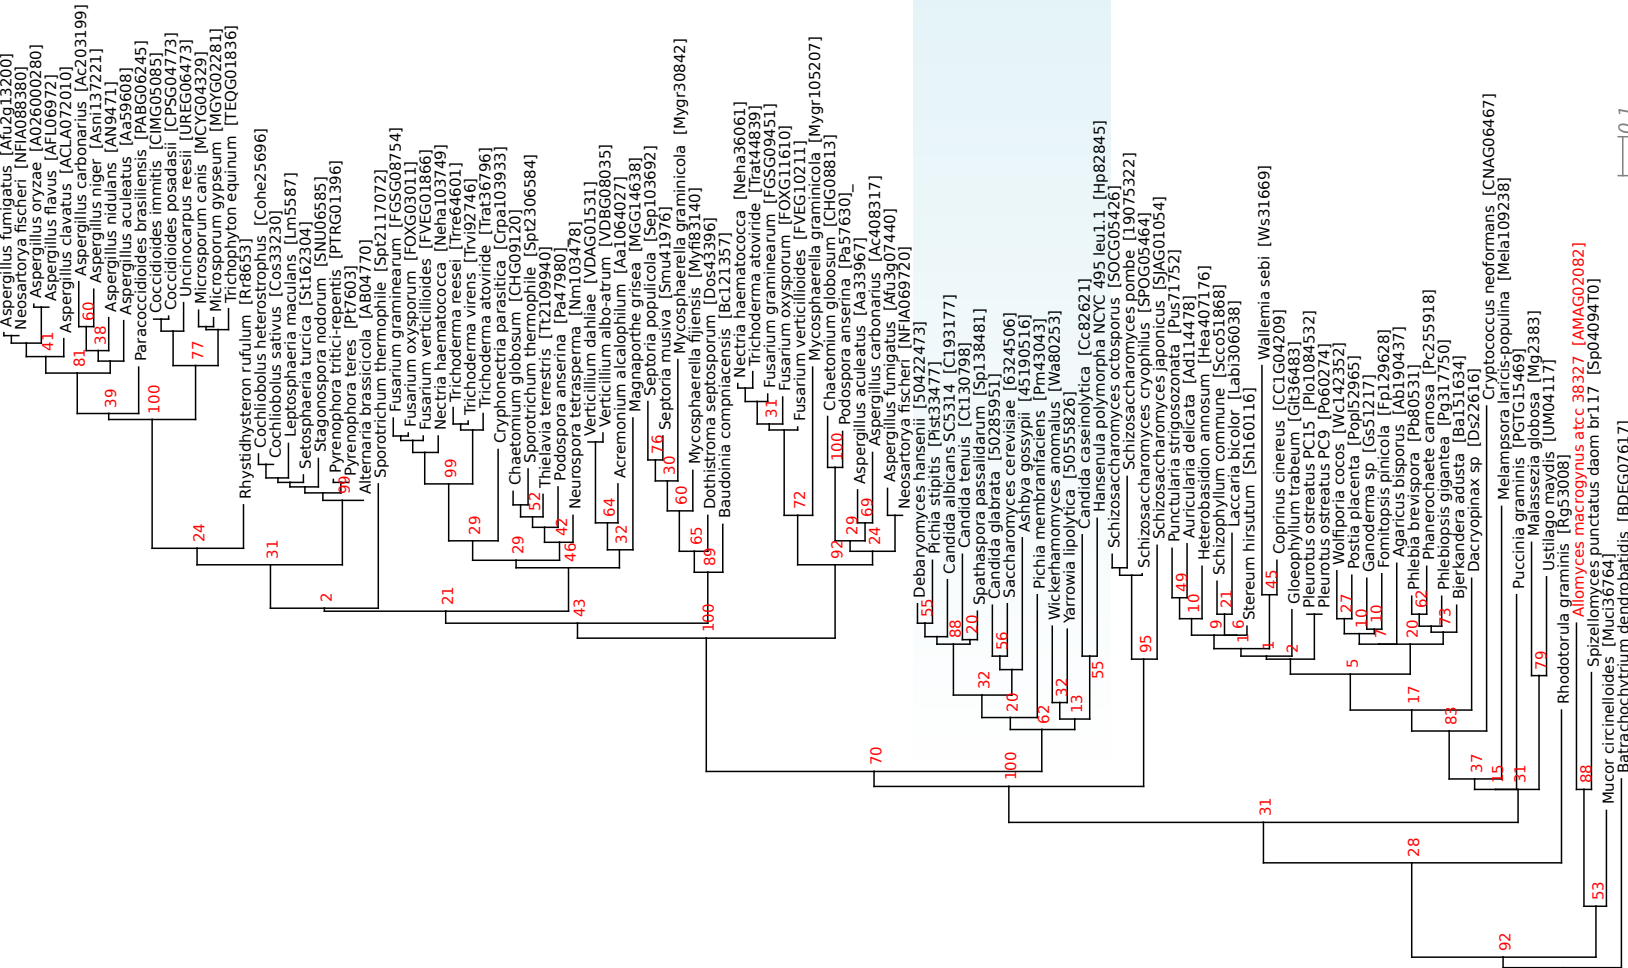

Annotation

✓ Presence

✗ Absence

# Other Fusion

5

24

100



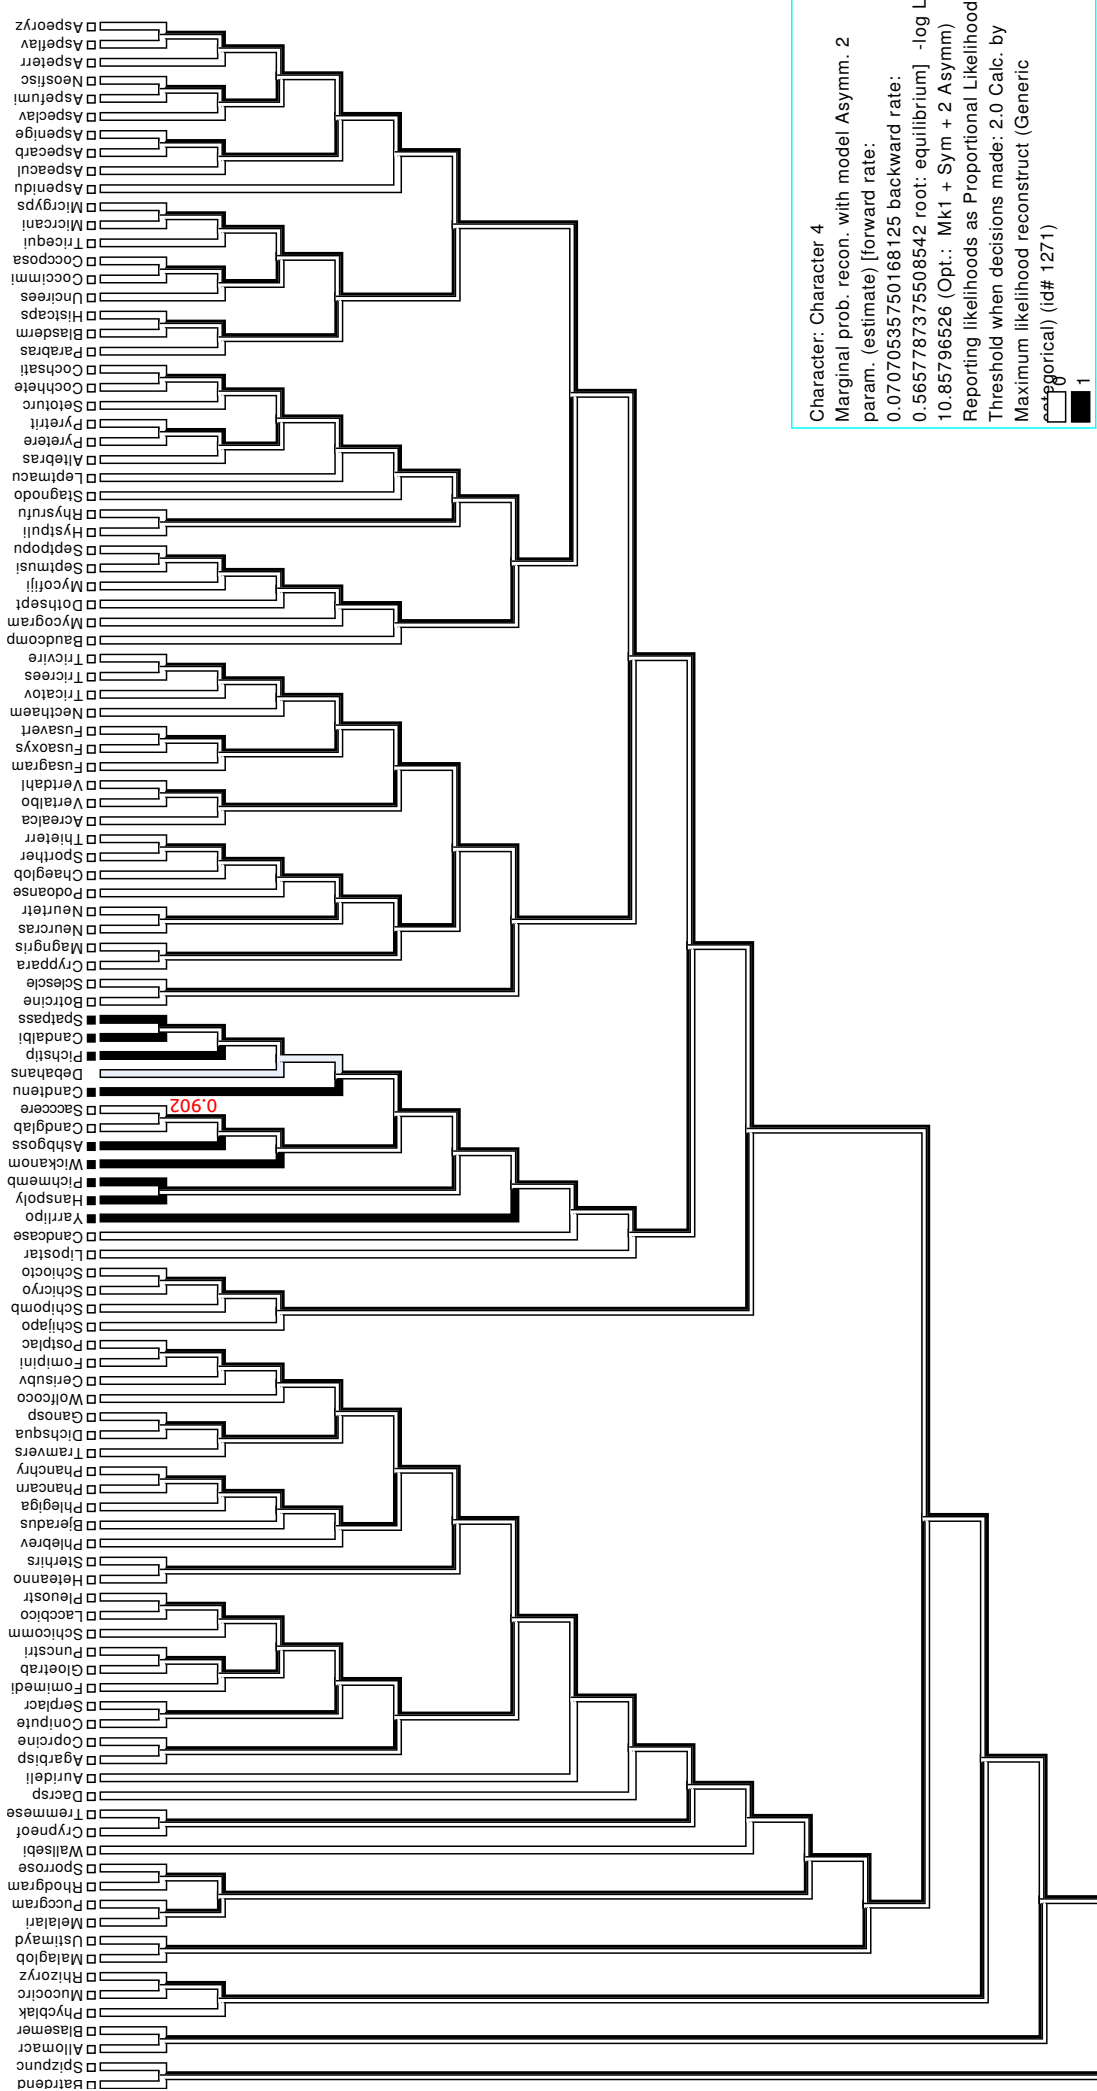

# Putative Fusion 5

September 26, 2012

## 1 Fasta Sequences

These are the unfused sequences identified by fdfBLAST belonging to the putative gene fusion in FASTA format. Accessions may be shortened, but belong to either the taxons individual genome project or NCBI's accession numbering.

```
>lcl|AMAG_11801 unnamed protein product
MDQPVALAAPRGS LAAMCAAHPDPAALTSLSLTHVMYHVDDALIGKALALITLLPLAMVVSYATLAAARPPEPLWLAMF
LGQLGNEGLNFVLKRWIAEHRPTPFLGKGYGMPSSHAQFMSYWCIFVLLLVAERRRLPSWLGPLIQLAALAI AALVIYS
RVHLQYHTVAQVLAGTAIGTVVGAVWFALVHPRFPLPSRPRPAEQHAKQE
>lcl|AMAG_02082 unnamed protein product
MSTTTNAADAADRYWLRHAITIAHRSAPVPSAYCVGAVLVSRTSTILPRASDAITPPDAPTNQIVLATGFSRELPGNTHA
EEVCLLKL PVGTDLAGCTMYTTMEPCSTRLSGRPSCTGRVLDKAVPRVVMGIVEPADL FVKCTGADTLRERGV EVVHIQG
LEEECWAPNRHLRERYDDGRNGAPRDSGAAADA
```

## 2 Annotated Phylograms

All trees were generated from an initial run of Darren's Orchard pipeline against 139 taxa (Table S1), using the above corresponding un-fused sequences as BLAST seeds. The alignments were then checked for any missing taxa, manually masked and then ProtTest3 was run, please see the Methods section for detail. The final trees were generated by the following command:

```
phym1 -i alignment_file -d aa -b 100 -m model -c 8 -v invariant_sites -s BEST --quiet
-a gamma
```

Styling and annotation was made possible by Dendroscope and Inkscape.

## 3 Mesquite Cladogram

This tree is the 68-gene concatenated phylogeny (Fig. 1), with the presence of a fusion (black), presence of a fission (white), and absent/undetermined (grey) status of gene fusion characters plotted on to it using a "1/0/-" nexus-style data matrix. We used the program 'Mesquite' to calculate proportional likelihoods based on either an "Mk1" or "Assym. 2 param model." (see Table S4) of character change across the fungal phylogeny (Fig. 1). This allowed for a proportional likelihood of the position of the fusion/fission to be calculated.

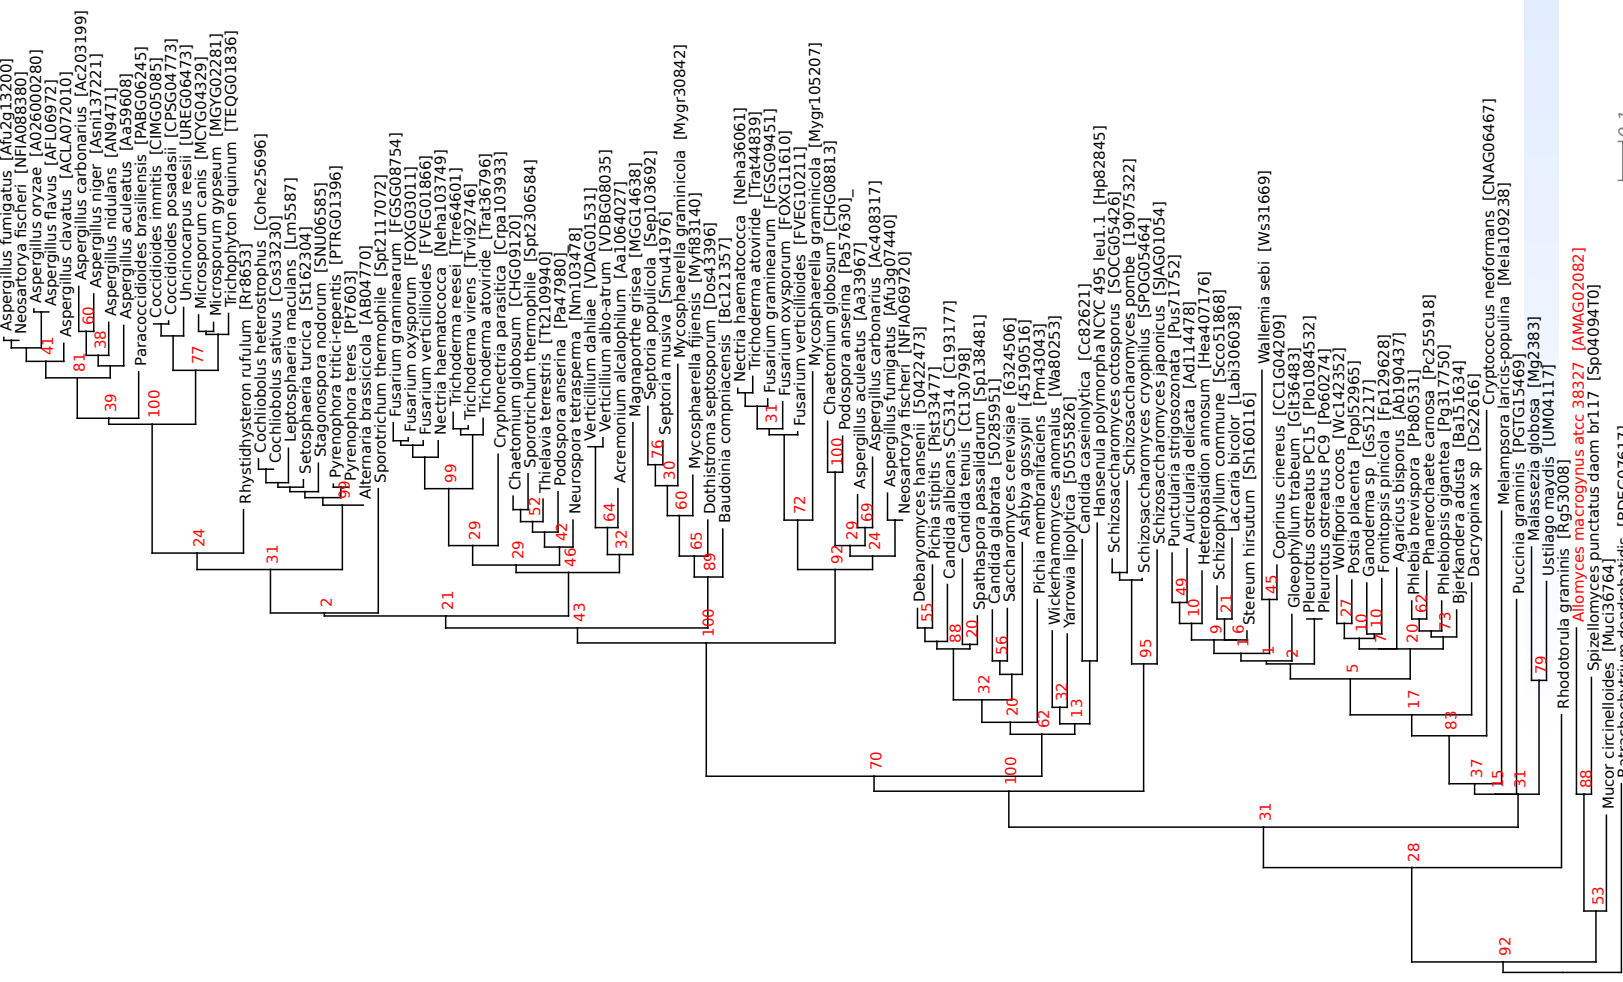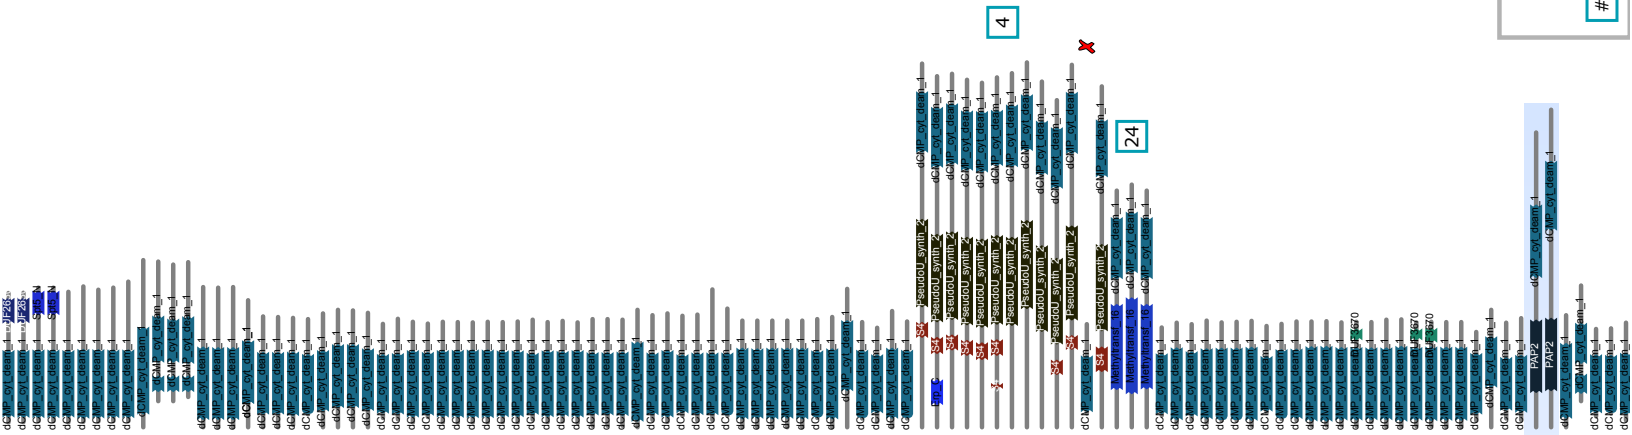

Annotation

✓ Presence

✗ Absence

# Other Fusion



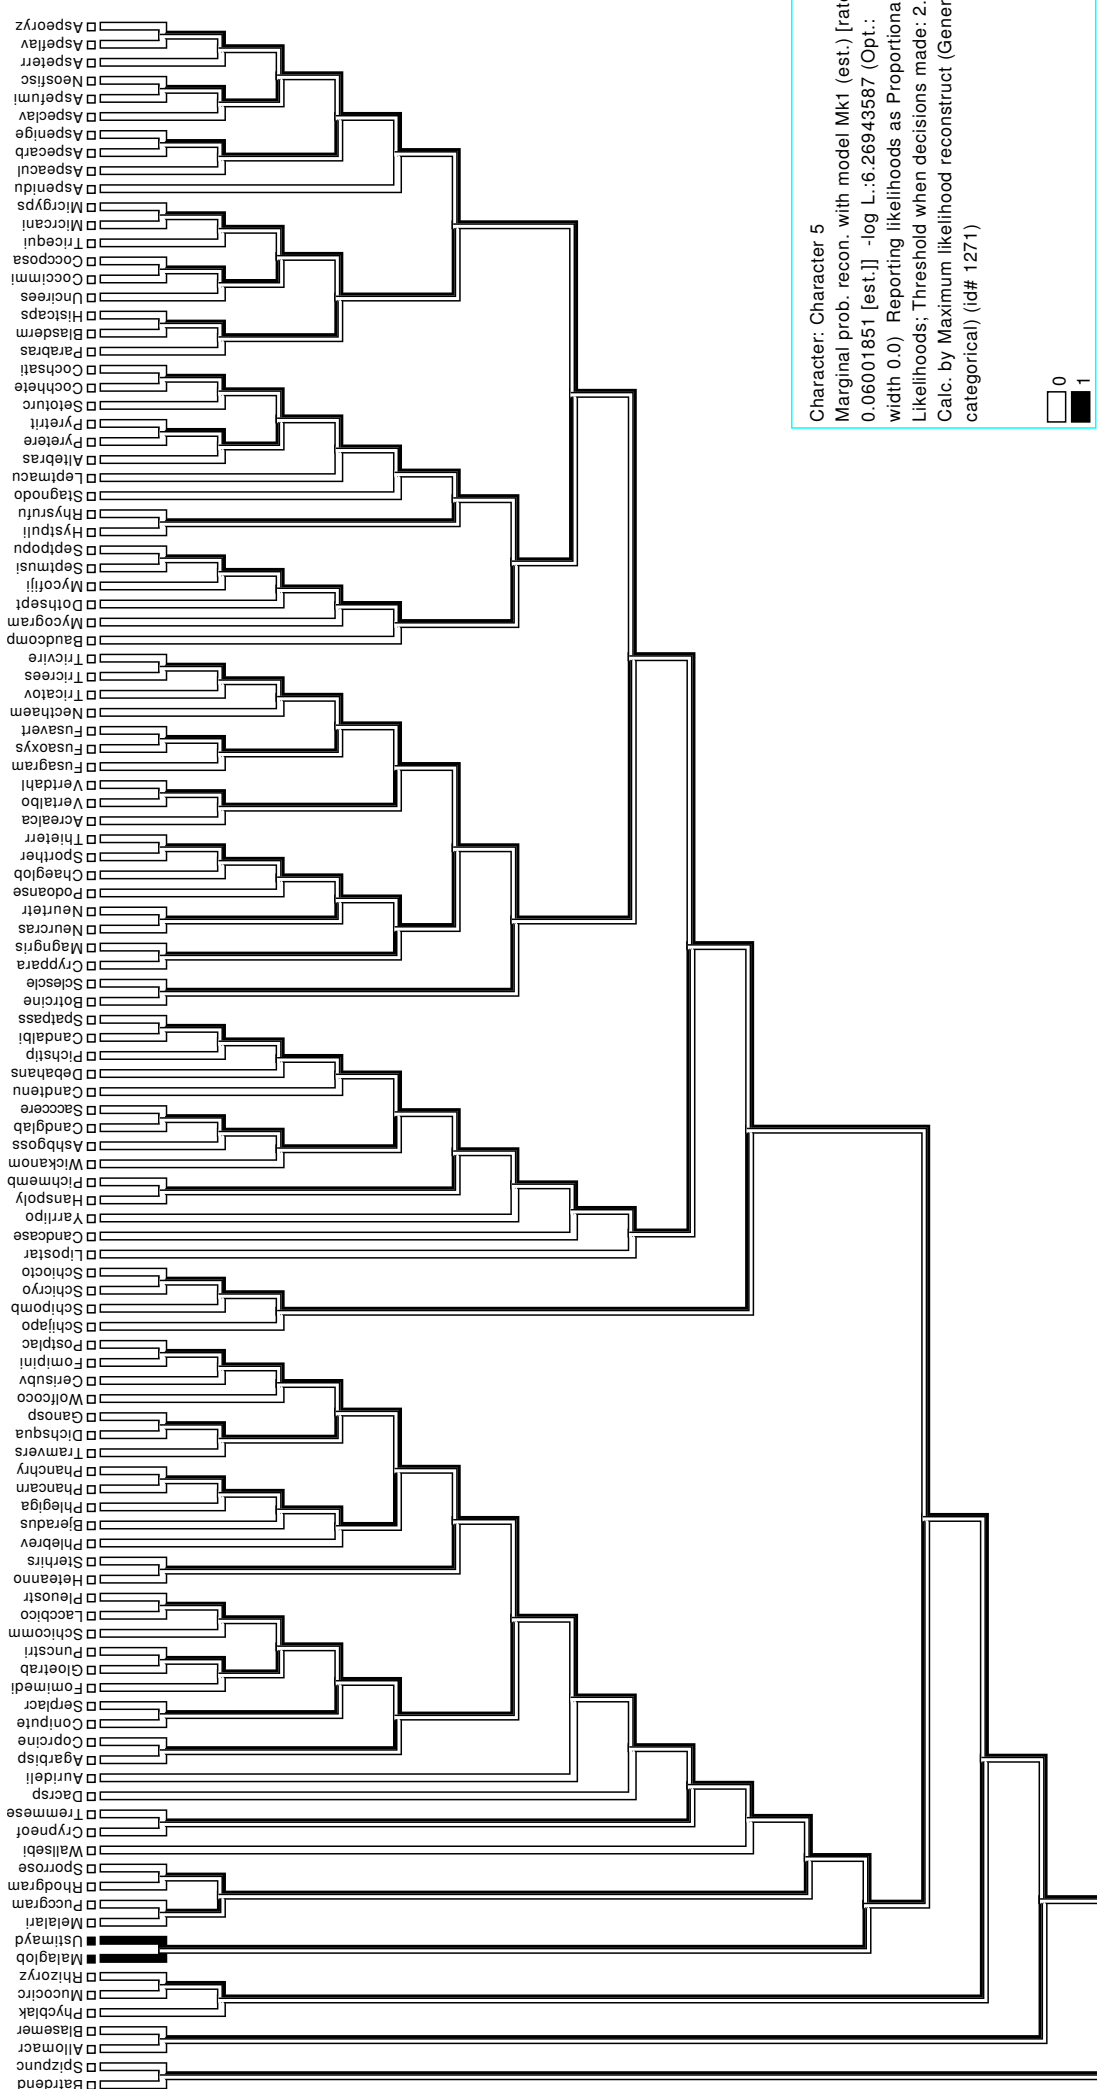



# Putative Fusion 6

September 26, 2012

## 1 Fasta Sequences

These are the unfused sequences identified by fdfBLAST belonging to the putative gene fusion in FASTA format. Accessions may be shortened, but belong to either the taxons individual genome project or NCBI's accession numbering.

```
>lcl|CC1G01304 unnamed protein product
MTSTTEFPPLQNDLLLRAARGEKTERAPVWVMRQAGRYLPEFREVRKSHEFFEVCRTPDLAMEVTLQPIRRYKGLLDASI
IFSDILVVPQAMGMEVLMNPGPSFPEPLDVPADVEKLRKEVDVNKELGYVFEAITQTRKLEGVVPLIGFCGAPWTLFSY
MIEGGGSKTLQKAKTWLFKYPEESKALLHRIAVVCVDFLVGQVKAGAQLLQVFDWSWAGELSPHDFDRFSFPTLQYIAKTV
RQRLAEAGLPDVPLTLFAKGANYALKKLADESGYDVLGLDWCIDPAEARRIVGDKVALQGNMDPNVLYGGREAIEQTVKR
MSAAFSGKGGWIANLGHGITPGVDPEDMRWFLECVHKYSSSG
>lcl|CC1G11378 unnamed protein product
MATETKQPRTFVVAARNSQLAQVQANSVLAQLEQLYASSDDPSKPKFTTSMSTAGDKNQSQALYLMGGKALWTKELEVA
LKDKEVDMLVHSLKDVPPTLPEGCLLGAILEREDPVDALVVKKGKEGVWKSLEDLPEGSVVGTSVRRVAQLKRKFPGLR
FLDVRGNLNLRLAKLDAEDGPYAALILAKAGLVRLGWGDRLTADLNPPTLYHAVSQGALAVEIRDDDLESLEILQKLTHR
GTDWKCRAERALLRVLEGGCSVPVGVYTTLTKEGGDELLEITGCVTSLDGSEHVEESLKEKVTSVEEAEAVGVKLAKVLM
EKGATRILDEINKDREHRIELAKVADAKGGP
```

## 2 Annotated Phylograms

All trees were generated from an initial run of Darren's Orchard pipeline against 139 taxa (Table S1), using the above corresponding un-fused sequences as BLAST seeds. The alignments were then checked for any missing taxa, manually masked and then ProtTest3 was run, please see the Methods section for detail. The final trees were generated by the following command:

```
phym1 -i alignment_file -d aa -b 100 -m model -c 8 -v invariant_sites -s BEST --quiet
-a gamma
```

Styling and annotation was made possible by Dendroscope and Inkscape.

## 3 Mesquite Cladogram

This tree is the 68-gene concatenated phylogeny (Fig. 1), with the presence of a fusion (black), presence of a fission (white), and absent/undetermined (grey) status of gene fusion characters plotted on to it using a "1/0/-" nexus-style data matrix. We used the program 'Mesquite' to calculate proportional likelihoods based on either an "Mk1" or "Assym. 2 param model." (see Table S4) of character change across the fungal phylogeny (Fig. 1). This allowed for a proportional likelihood of the position of the fusion/fission to be calculated.

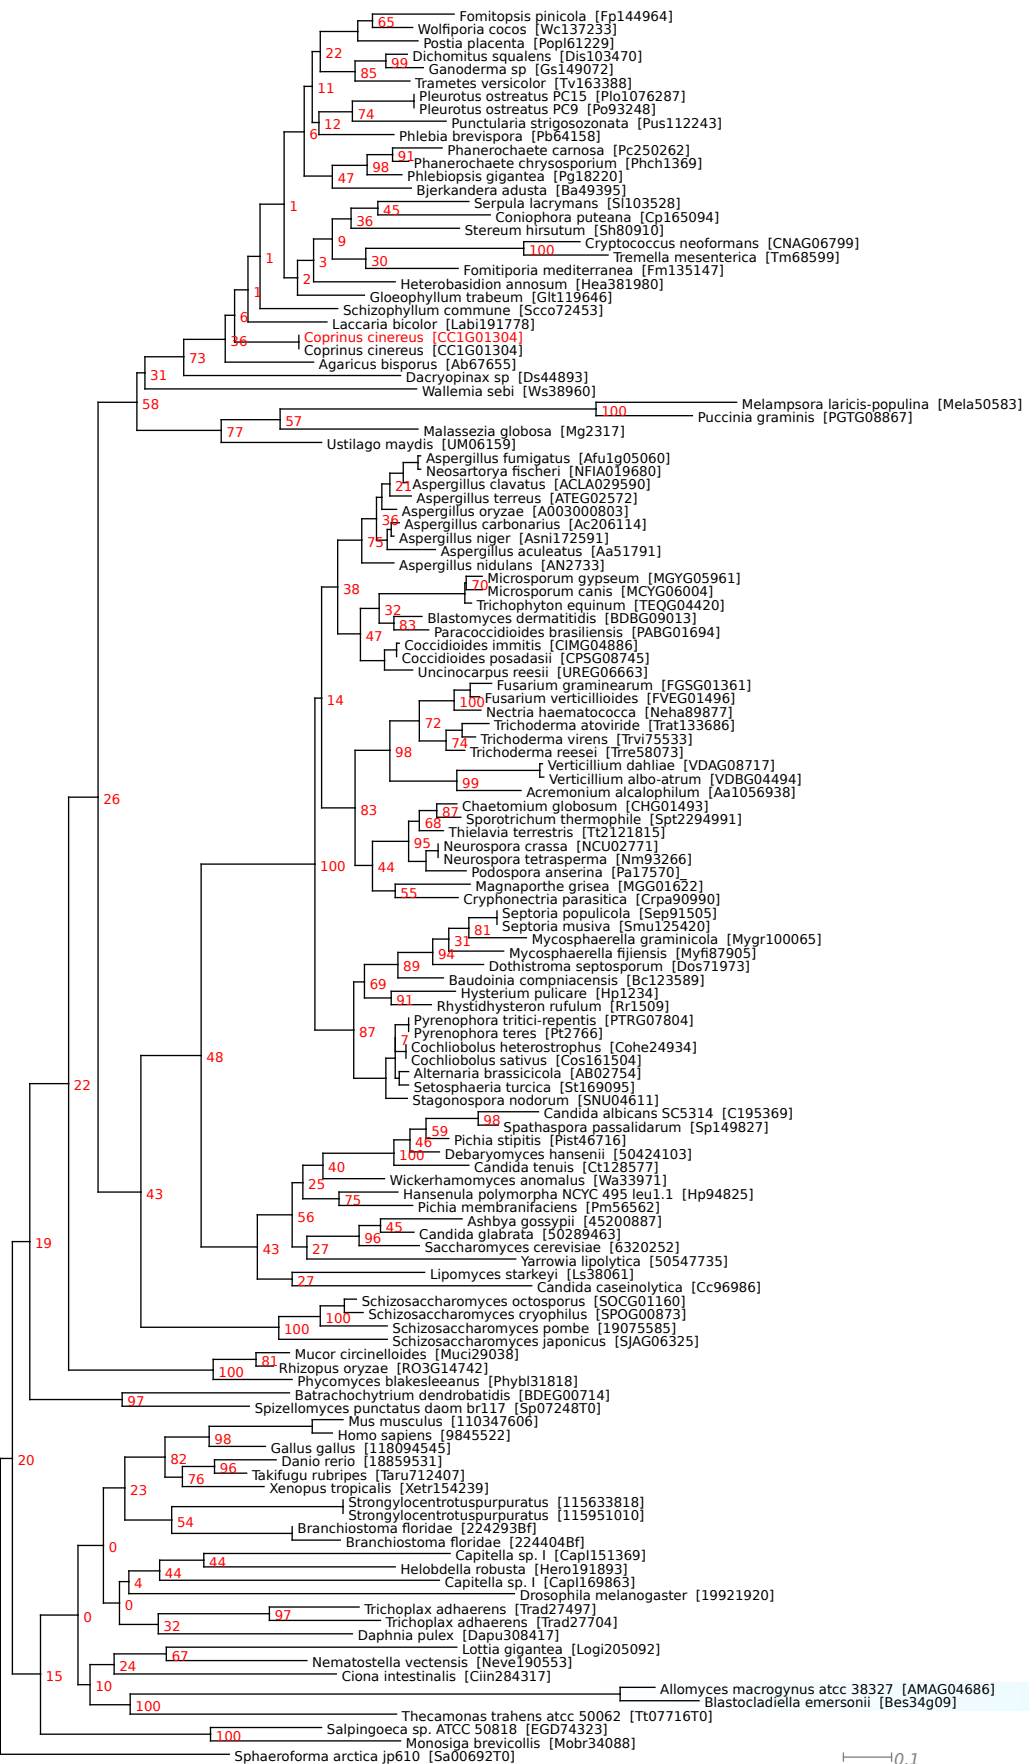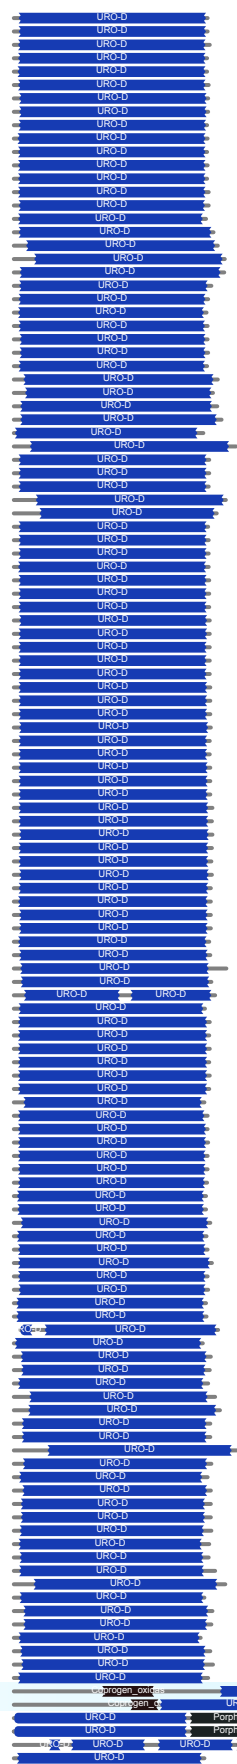

Annotation

- ✓ Presence
- # Other Fusion
- ✗ Absence

0.1

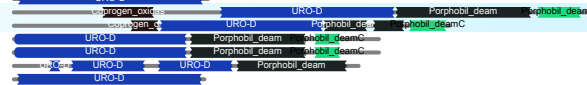

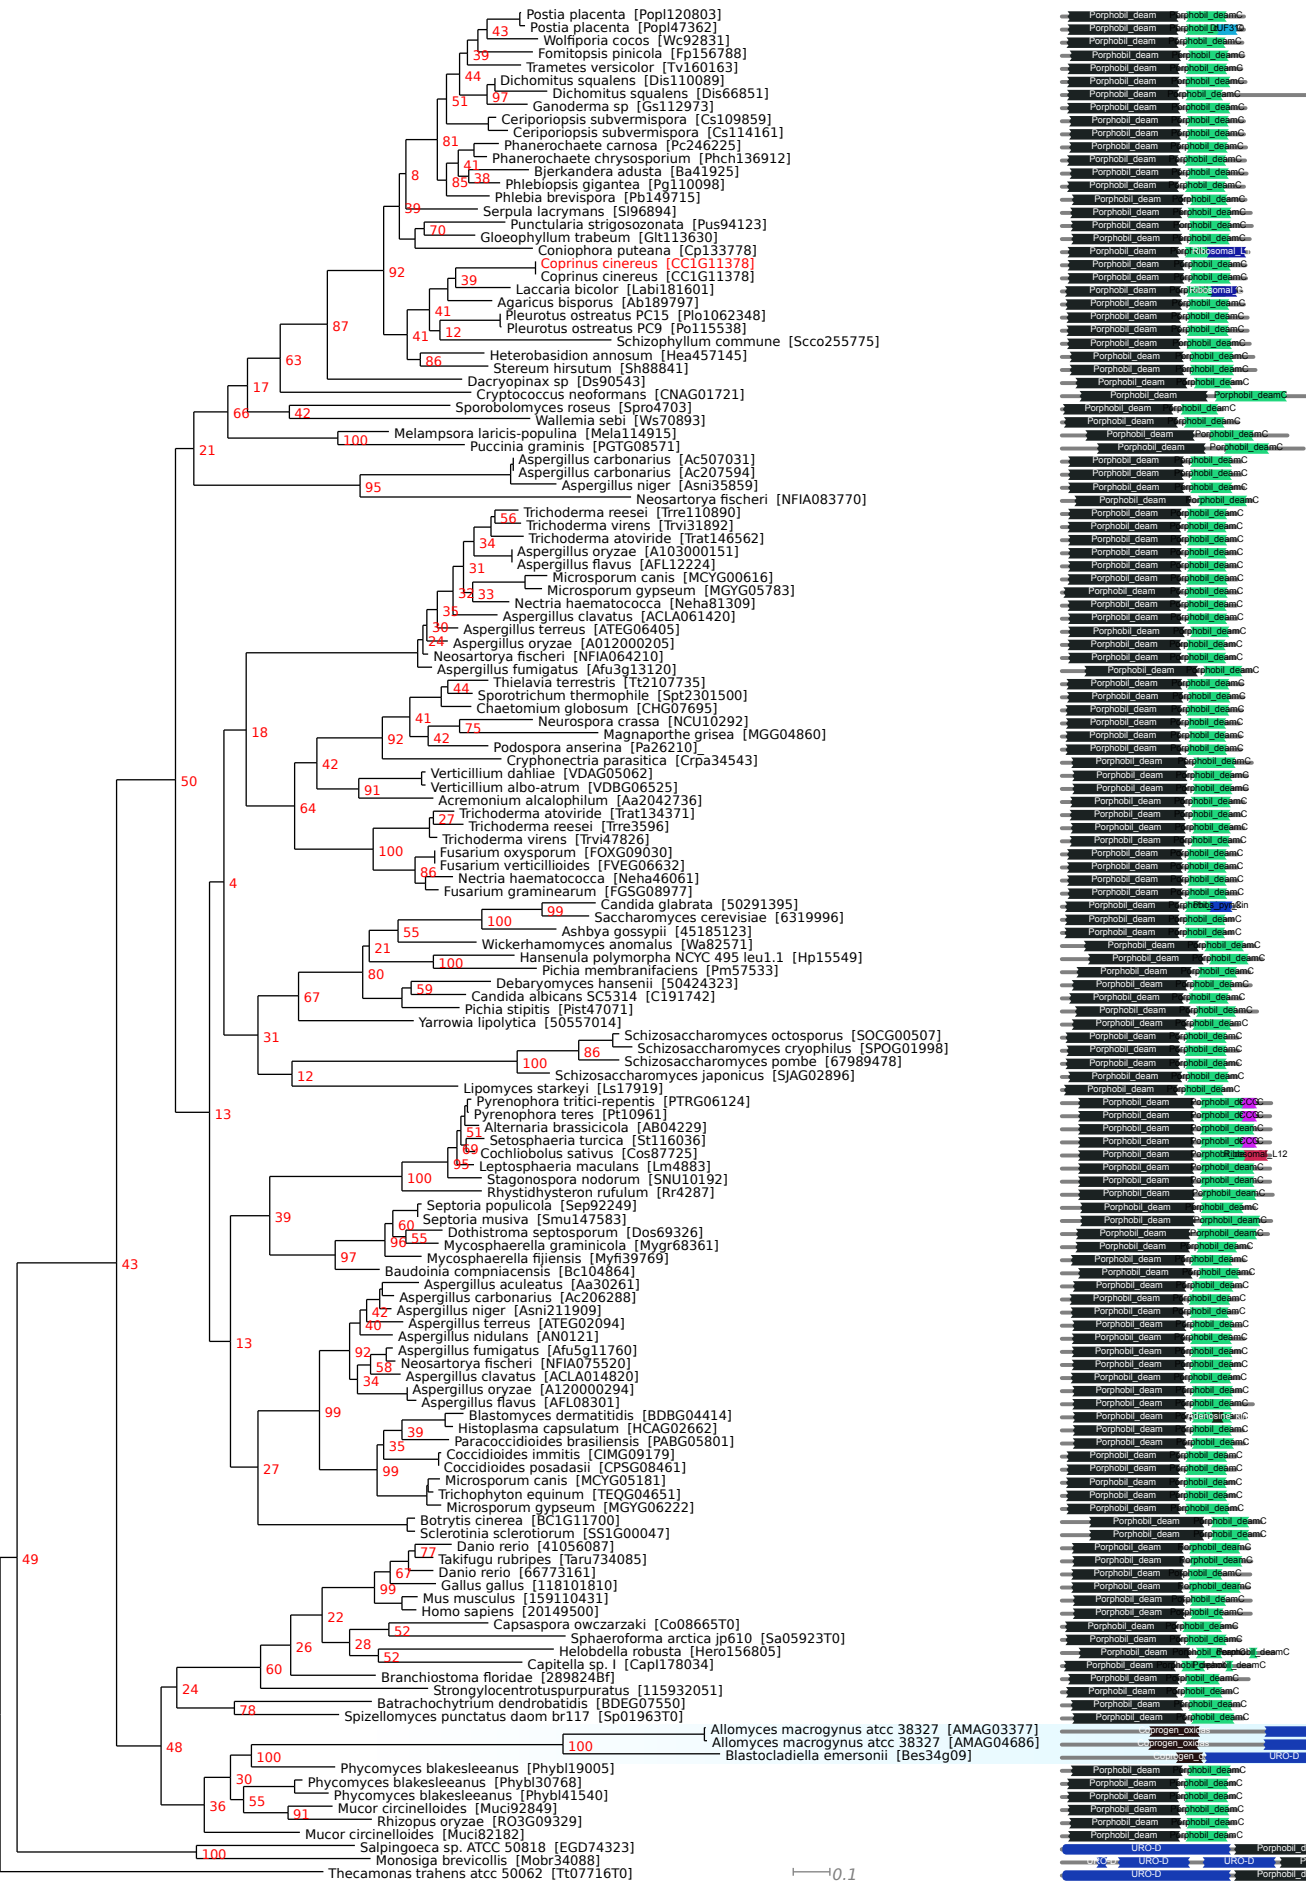

Annotation  
 ✓ Presence  
 ✗ Absence  
 # Other Fusion

0.1

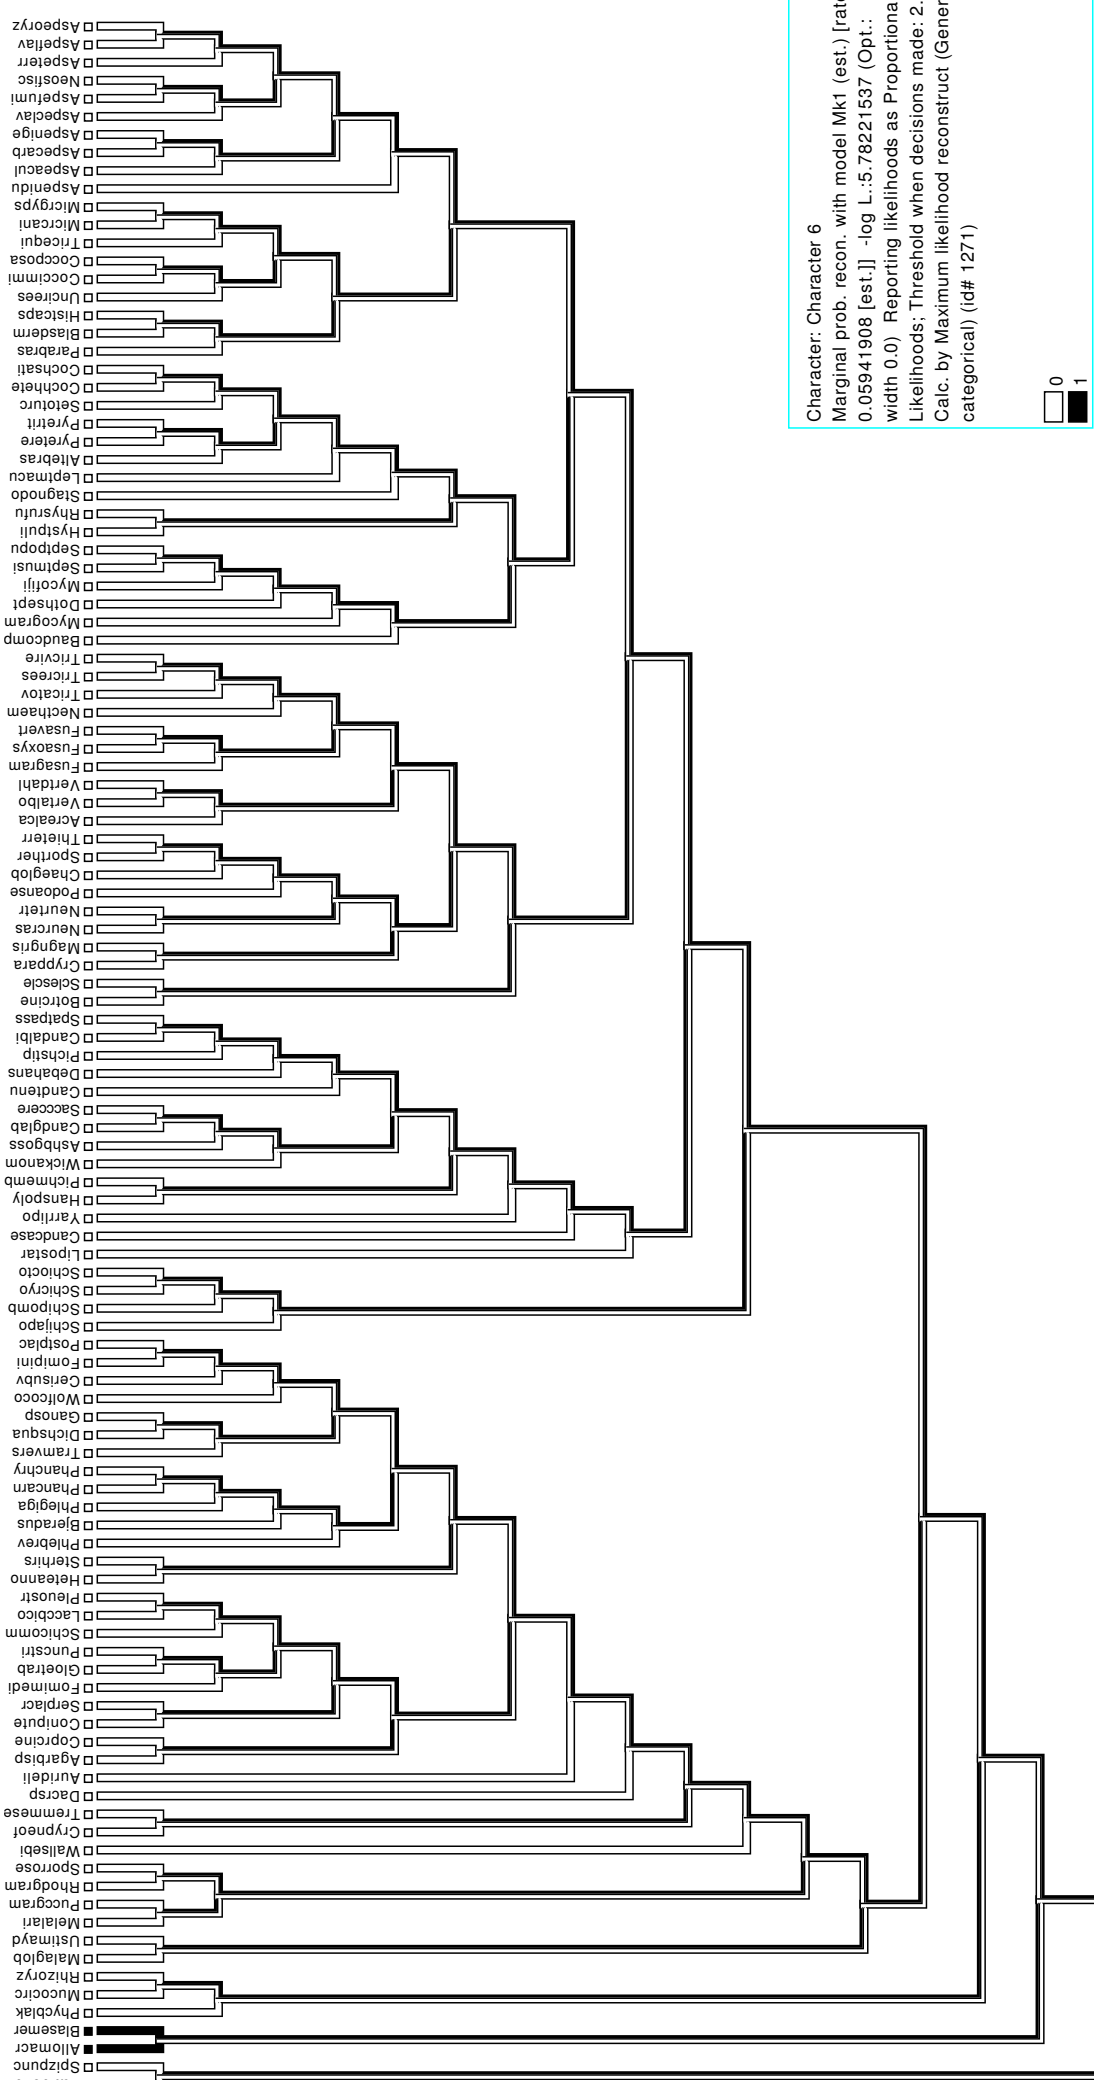

Character: Character 6  
 Marginal prob. recon. with model Mk1 (est.) [rate  
 0.05941908 [est.]] -log L.:5.78221537 (Opt.:  
 width 0.0) Reporting likelihoods as Proportional  
 Likelihoods; Threshold when decisions made: 2.0  
 Calc. by Maximum likelihood reconstruct (Generic  
 categorical) (idf: 1271)

0  
 1

Modified from Tree1++

# Putative Fusion 7

September 26, 2012

## 1 Fasta Sequences

These are the unfused sequences identified by fdfBLAST belonging to the putative gene fusion in FASTA format. Accessions may be shortened, but belong to either the taxons individual genome project or NCBI's accession numbering.

```
>lcl|R03T03066 unnamed protein product
MSPKKVSIVCLPGDGVGPEIVAEAVKVLLEIISKYRSAALGVFEFVKHELIGLAAMEKTGEPLPDSALDACKQADAILLGA
VGGLPGAQIGSGPRPEQGLLKRKELDLYANLRPVSFAAEKLLHLSPLKDHVVKGTFNFVRELVGGIYFGDRKEAGEDG
KAYDTLPYSKPEVERVTRLAALLAKKQSPGKIHSVDKANVLATSRLWRKTVTETMEKEFPELGFQDHQLVDSCAMAMVQR
PTSLNGVVLTENMFGDILSDEASVIVGSLGLLPSASLSGLPDGNGKCLGVYEPHGSAPDIAGQGIANPVPATILSVAMLL
RYSLGFSEAVAVEEA VRKVL DAGIYTRDLKGDKSTVEVGNVAVCEELVELLKSL
>lcl|R03T05663 unnamed protein product
MARTLYDKVLEDHII DRQEDGTCLIIYIDRHLVHEVTSPQAFEGLRNAGRVPVRRPDCTLATVDHNIPTSPRKNFKNIATFI
KEADSRTQCETLEQNIEAFGLTYFGMEDSRQIVHVI GPEQGFTLP GTTVVCGDSHTSTHGAFGALAFGIGTSEVEHVLA
TQTL LQKKSKNM RIRVEGKPSAGVTSKDIALHVIGVIGTAGGTGCVIEFCGEAIESLSMESRMSICNMSIEAGARAGMIA
PDDITFEYLRNKPLAPKGEEDRAVAYWKTLKSDADAQYDITVDIKASDIAPTVTWGTSPQDVAPITGKTPDLDSIADPL
RRLAVQRALDYIGIAPNTPLEGVKIDKVFIGSCTNSRIEDLRAAAAIVKGRVADWVDAMVVP GSGLVKRQAEREGLDKI
FQEAGFDWREAGCSMCLGMNPDQLKPGERCASTSNRNFEGRQGAGGRTHLLSPAMAAAAGIKGCLTDVRHMEVAEIALTG
NESPRQEVVASEYDGS AEVSESTQDTPAVKPPQPASDSSSSGGMPAFTTLKG YAAPLDISNIDTDMIIPKQFLKTIKRT
GLGSALFYSLRFDPQTGAENPAFVLNQEPFRQARILVCTGPNFGCGSSREHAPWAFNDFGIRCILAPSFADIFFNFCFN
GMLPIVLPQAQLEAIAAEAQKGV EVDLVQQIVRYPGGEVVSFDVEEFRKHCLVNGLDDIGLTMQKADKIAQFETKRTQT
WPWLDGKGYK GKATKIEINGGQKKAKLDW
```

## 2 Annotated Phylograms

All trees were generated from an initial run of Darren's Orchard pipeline against 139 taxa (Table S1), using the above corresponding un-fused sequences as BLAST seeds. The alignments were then checked for any missing taxa, manually masked and then ProtTest3 was run, please see the Methods section for detail. The final trees were generated by the following command:

```
phyml -i alignment_file -d aa -b 100 -m model -c 8 -v invariant_sites -s BEST --quiet
-a gamma
```

Styling and annotation was made possible by Dendroscope and Inkscape.

## 3 Mesquite Cladogram

This tree is the 68-gene concatenated phylogeny (Fig. 1), with the presence of a fusion (black), presence of a fission (white), and absent/undetermined (grey) status of gene fusion characters plotted on to it using a "1/0/-" nexus-style data matrix. We used the program 'Mesquite' to calculate proportional likelihoods based on either an "Mk1" or "Assym. 2 param model." (see Table S4) of character change across the fungal phylogeny (Fig. 1). This allowed for a proportional likelihood of the position of the fusion/fission to be calculated.



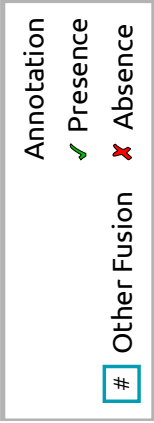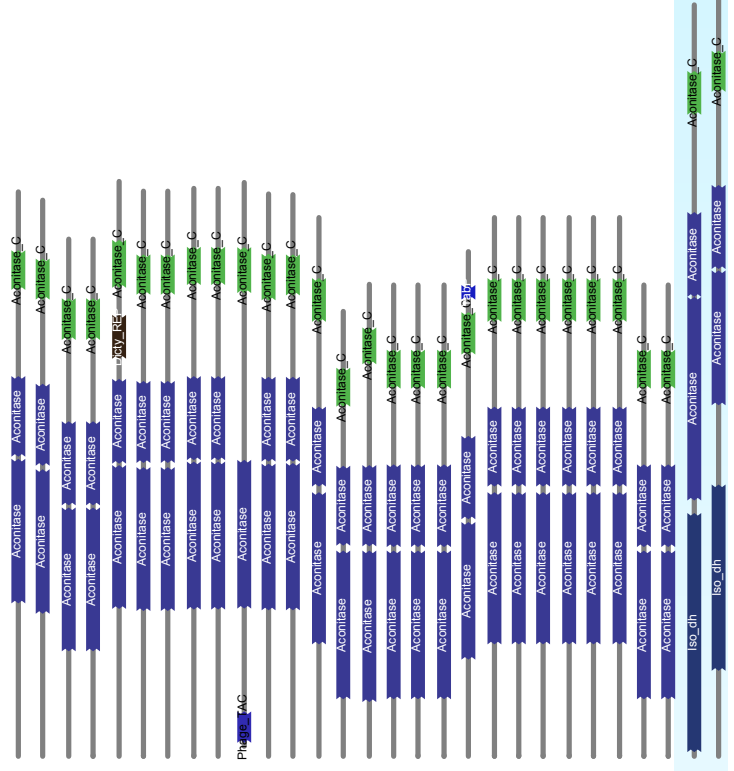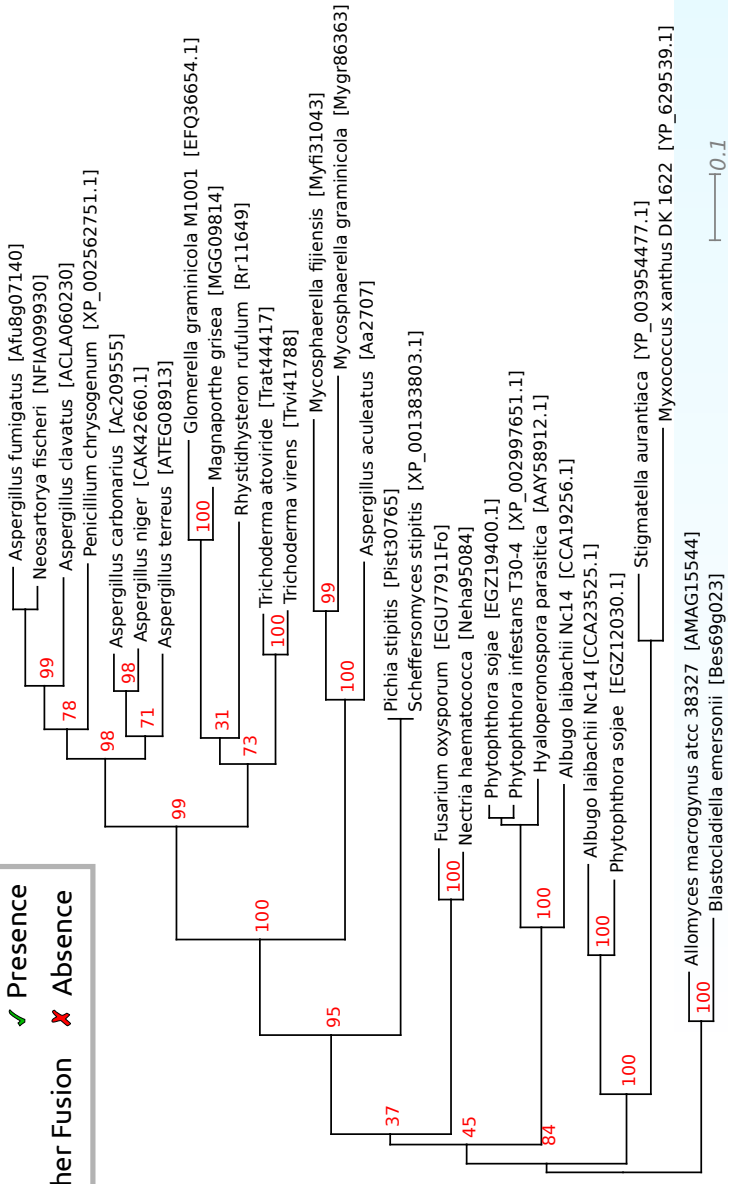



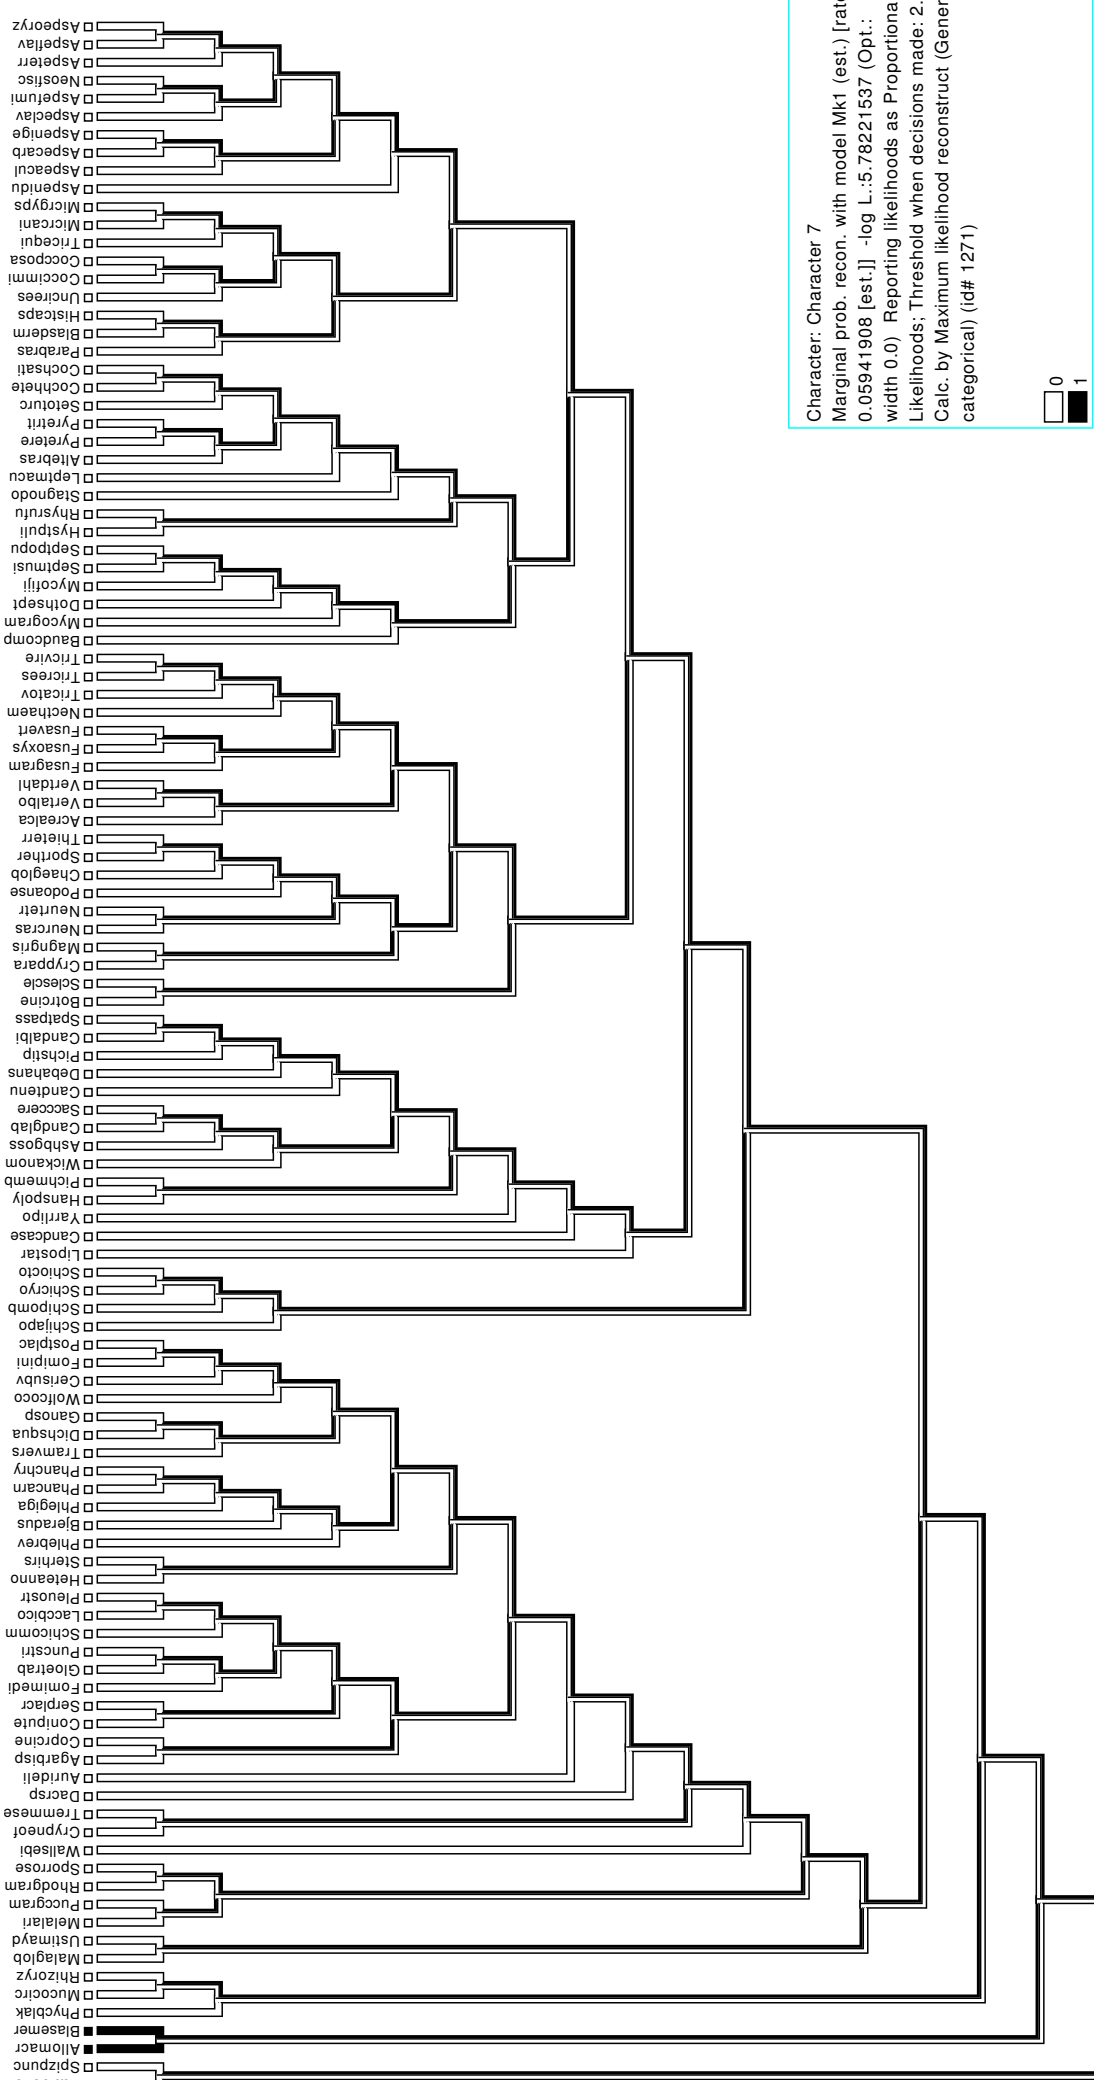

Character: Character 7  
 Marginal prob. recon. with model Mk1 (est.) [rate  
 0.05941908 [est.]] -log L.:5.78221537 (Opt.:  
 width 0.0) Reporting likelihoods as Proportional  
 Likelihoods; Threshold when decisions made: 2.0  
 Calc. by Maximum likelihood reconstruct (Generic  
 categorical) (idf: 1271)

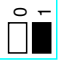

Modified from Tree1++



# Putative Fusion 8

September 26, 2012

## 1 Fasta Sequences

These are the unfused sequences identified by fdfBLAST belonging to the putative gene fusion in FASTA format. Accessions may be shortened, but belong to either the taxons individual genome project or NCBI's accession numbering.

```
>lcl|173045Sc unnamed protein product
MSVHAATNPINKHVVLIDNYDSFTWNVYEYLCQEGAKVSVYRNDAITVPEIAALNPDTLLISPGPGHPKTDSGISRDCIR
YFTGKIPVFGICMGQQCMFDVFGGEVAYAGEIVHGKTSPISHDNCGIFRNVPQGI AVTRYHSLAGTESSLPSCLKVTAST
ENGIIMGVRHKKYTVQVQFHPESILTEEGHLMIRNINLVSGGTWEENKSSPSNSILDRIYARRKIDVNEQSKIPGFTFQ
DLQSNYDLGLAPPLQDFYTVLSSSHKRAVVLAEVKRASPSKGPICLKAVAAEQALKYAEAGASAI SVLTEPHWFHGLSLQD
LVNVRKILD LKFPPKERPCVLRKEFIFSKYQILEARLAGADTVLLIVKMLSQPLLKELYSYSKDLNMEPLVEVNSKEELQ
RALEIGAKVVGNNRDLHSFNVDLNTTSNLVESIPKDVLLIALSGITTRDDAEKYKKEGVHGFLVGEALMKSTDVKKFIH
ELCE
>lcl|136348Sc unnamed protein product
MSVINFTGSSGPLVKVCGLQSTEAECALDSDADLLGIICVPNRKRITDPVIARKISTLVKAYKNSSGTPKYL VGVFRNQ
PKEDVLALVNDYGDIVQLHGDESWQEYQEFGLPVIKRLVFPKDCNILLSAASQKPHSFIP LFDSEAGGTGELLDWNSI
SDWVGRQESPELHFMLAGGLTPENVGDALRLNGVIGVDVSGGVETNGVKDSNKIANFVKNAKK
```

## 2 Annotated Phylograms

All trees were generated from an initial run of Darren's Orchard pipeline against 139 taxa (Table S1), using the above corresponding un-fused sequences as BLAST seeds. The alignments were then checked for any missing taxa, manually masked and then ProtTest3 was run, please see the Methods section for detail. The final trees were generated by the following command:

```
phym1 -i alignment_file -d aa -b 100 -m model -c 8 -v invariant_sites -s BEST --quiet
-a gamma
```

Styling and annotation was made possible by Dendroscope and Inkscape.

## 3 Mesquite Cladogram

This tree is the 68-gene concatenated phylogeny (Fig. 1), with the presence of a fusion (black), presence of a fission (white), and absent/undetermined (grey) status of gene fusion characters plotted on to it using a "1/0/-" nexus-style data matrix. We used the program 'Mesquite' to calculate proportional likelihoods based on either an "Mk1" or "Assym. 2 param model." (see Table S4) of character change across the fungal phylogeny (Fig. 1). This allowed for a proportional likelihood of the position of the fusion/fission to be calculated.

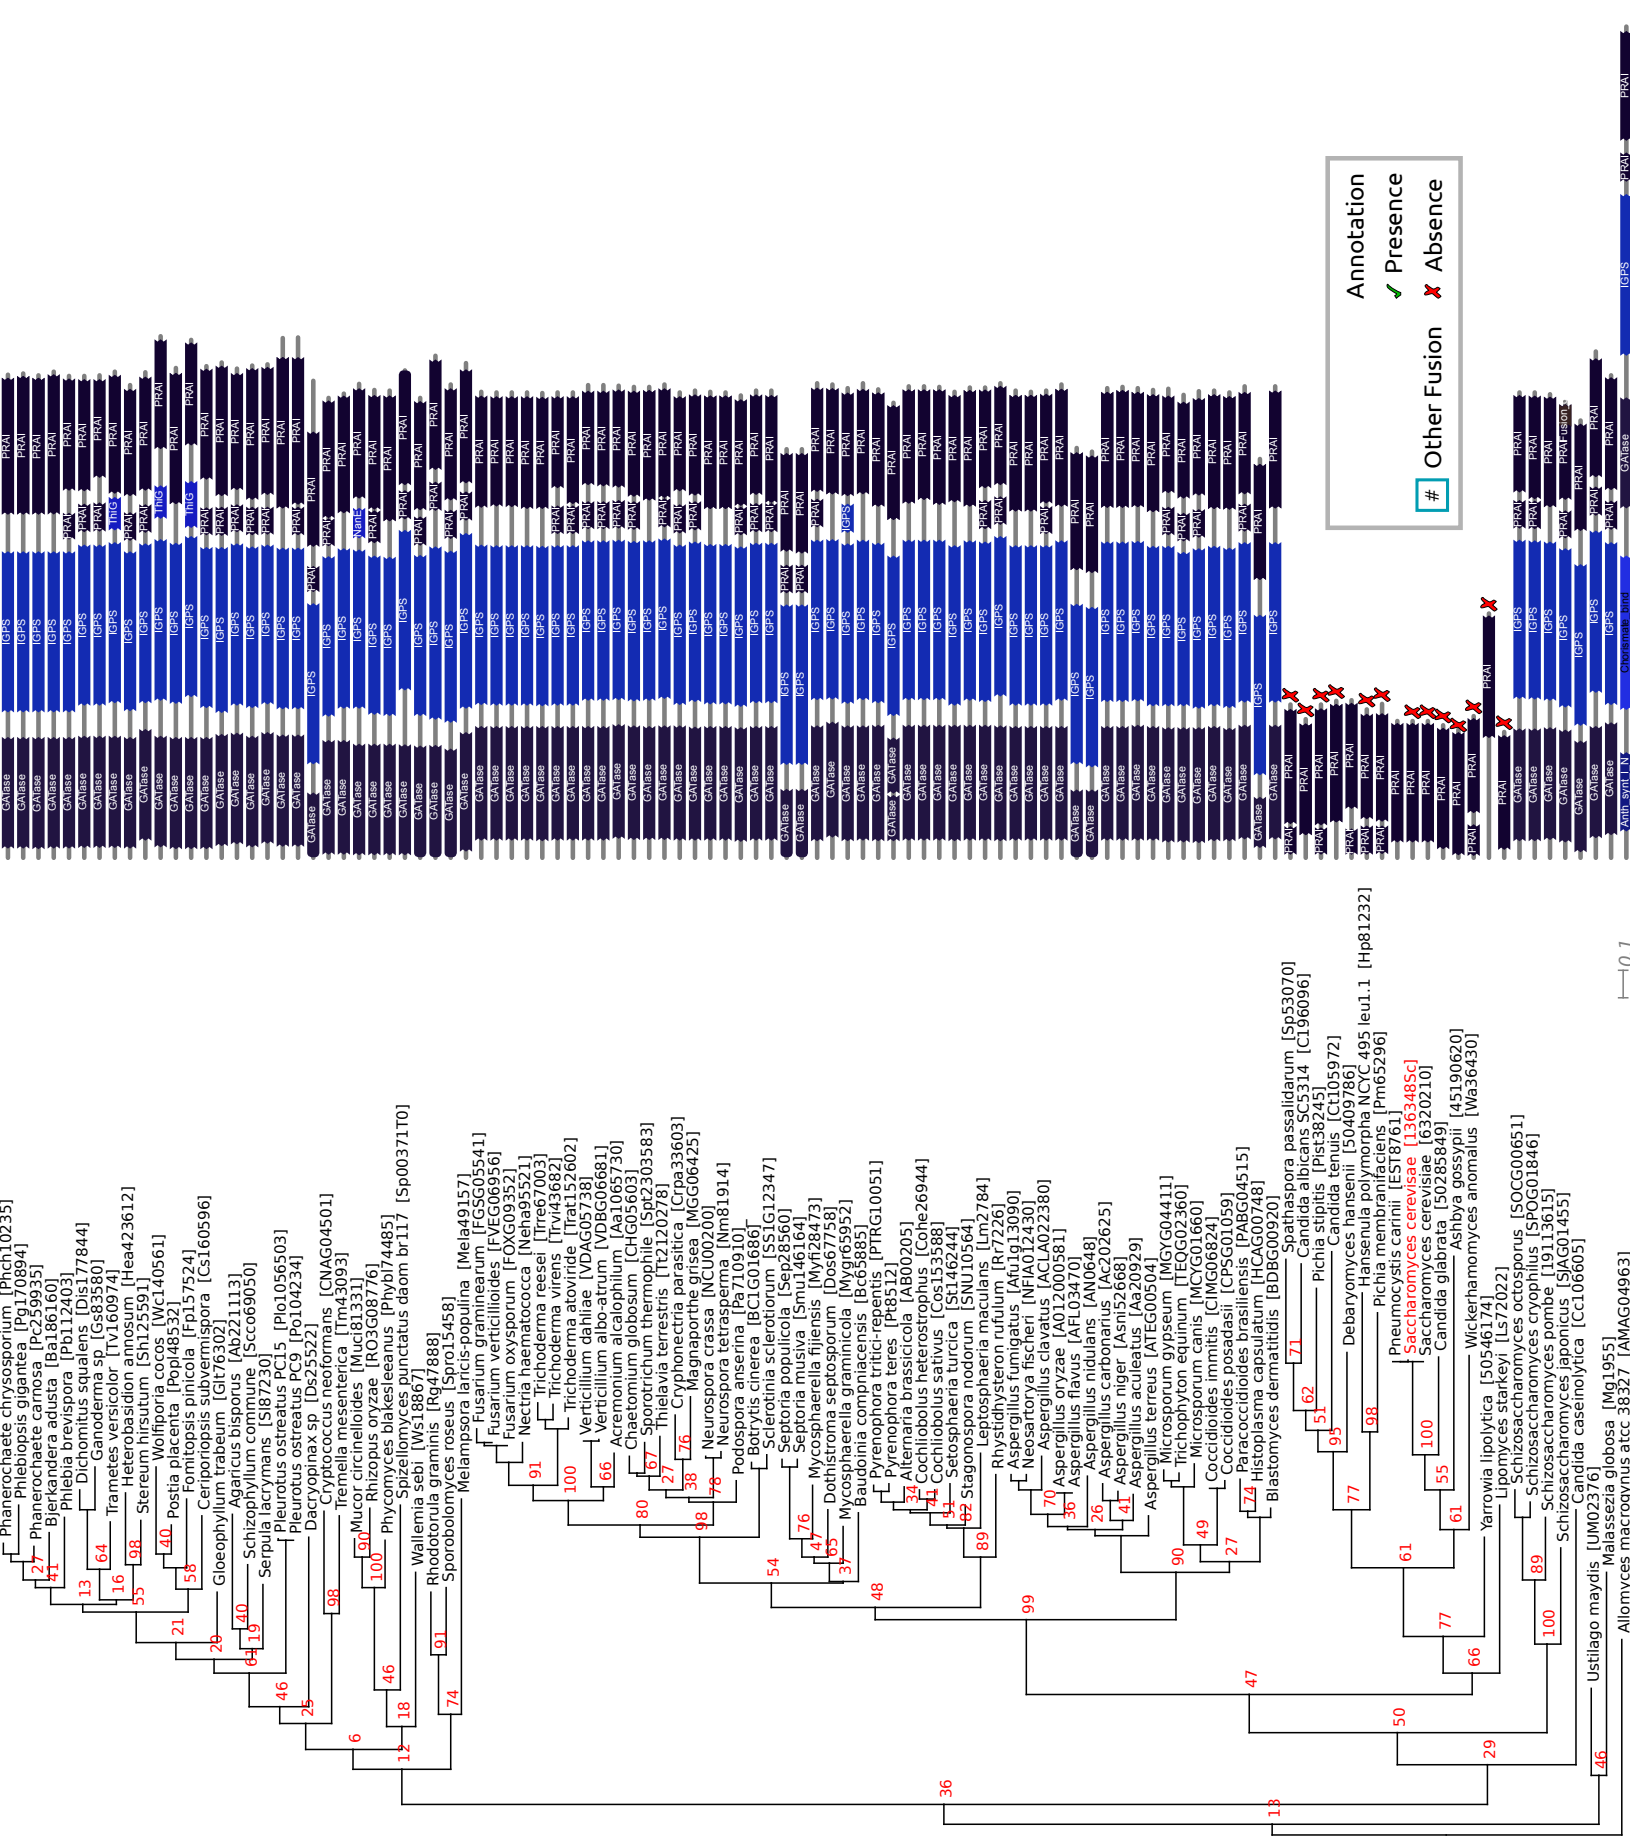

**Annotation**

- ✓ Presence
- ✗ Absence
- # Other Fusion





# Putative Fusion 9

September 26, 2012

## 1 Fasta Sequences

These are the unfused sequences identified by fdfBLAST belonging to the putative gene fusion in FASTA format. Accessions may be shortened, but belong to either the taxons individual genome project or NCBI's accession numbering.

```
>lcl|Mc109954 unnamed protein product
MLLTASRVFTISKRSFHAYPIAKKFVITPEIKAAIERKGPVVALESTIISHGMPYPQNVETAKAVENIIREQGAIPATIA
LLDGKVHIGLTDETLEHLGKIGPKAQKTSRRDLSVLSQNKAGATTVASTMILARAAGIPVFVTGGIGGVHRGAEQSFDI
SADLTELGRTPVAVVCAGVKSILDIPKTLEVLETQGVTVTTIGKNNQFPAYTPDSGFKSPYHVEDPLDAAKSIHANHEL
EMNSGMVFAVPIPSASAADAASIQAIDTAIAEARANNVHGKEETPFLLKRIAELTKGESLAANIALVKNNAKIGGQIAV
HLSQLKNRV
>lcl|Mc168016 unnamed protein product
MSGKPLLVIIGGIALDITATVKGKSFASILHTSTPGHVKQSLGGVGRNVAEAAWRTGARVKLVSVVGGDDLAGEVSKQGLKS
ISMNTEYIQTLANQPTAVYNALHSEDGQLIAAVADMNIFDAMDTKIISILQHEKPSFVCFDGNITAQMMKSIAMTCQAL
AIPALFEPTSVPKSLKLFQHAETMMAQAVKYTSPNQFELEAMCDTIRSNPVFSDKAAAKQQNAPTLAHLALPNACFLSQF
IPNVITKLGEEGCLYVSKNAGAIEYFAPESIEPNEIVNVTGAGDCFVGTLIANLQKHANANMLLSSNVLRSIIRNAQTASI
RTLKSNRAVSDEISPDLLQL
```

## 2 Annotated Phylograms

All trees were generated from an initial run of Darren's Orchard pipeline against 139 taxa (Table S1), using the above corresponding un-fused sequences as BLAST seeds. The alignments were then checked for any missing taxa, manually masked and then ProtTest3 was run, please see the Methods section for detail. The final trees were generated by the following command:

```
phym1 -i alignment_file -d aa -b 100 -m model -c 8 -v invariant_sites -s BEST --quiet
-a gamma
```

Styling and annotation was made possible by Dendroscope and Inkscape.

## 3 Mesquite Cladogram

This tree is the 68-gene concatenated phylogeny (Fig. 1), with the presence of a fusion (black), presence of a fission (white), and absent/undetermined (grey) status of gene fusion characters plotted on to it using a "1/0/-" nexus-style data matrix. We used the program 'Mesquite' to calculate proportional likelihoods based on either an "Mk1" or "Assym. 2 param model." (see Table S4) of character change across the fungal phylogeny (Fig. 1). This allowed for a proportional likelihood of the position of the fusion/fission to be calculated.

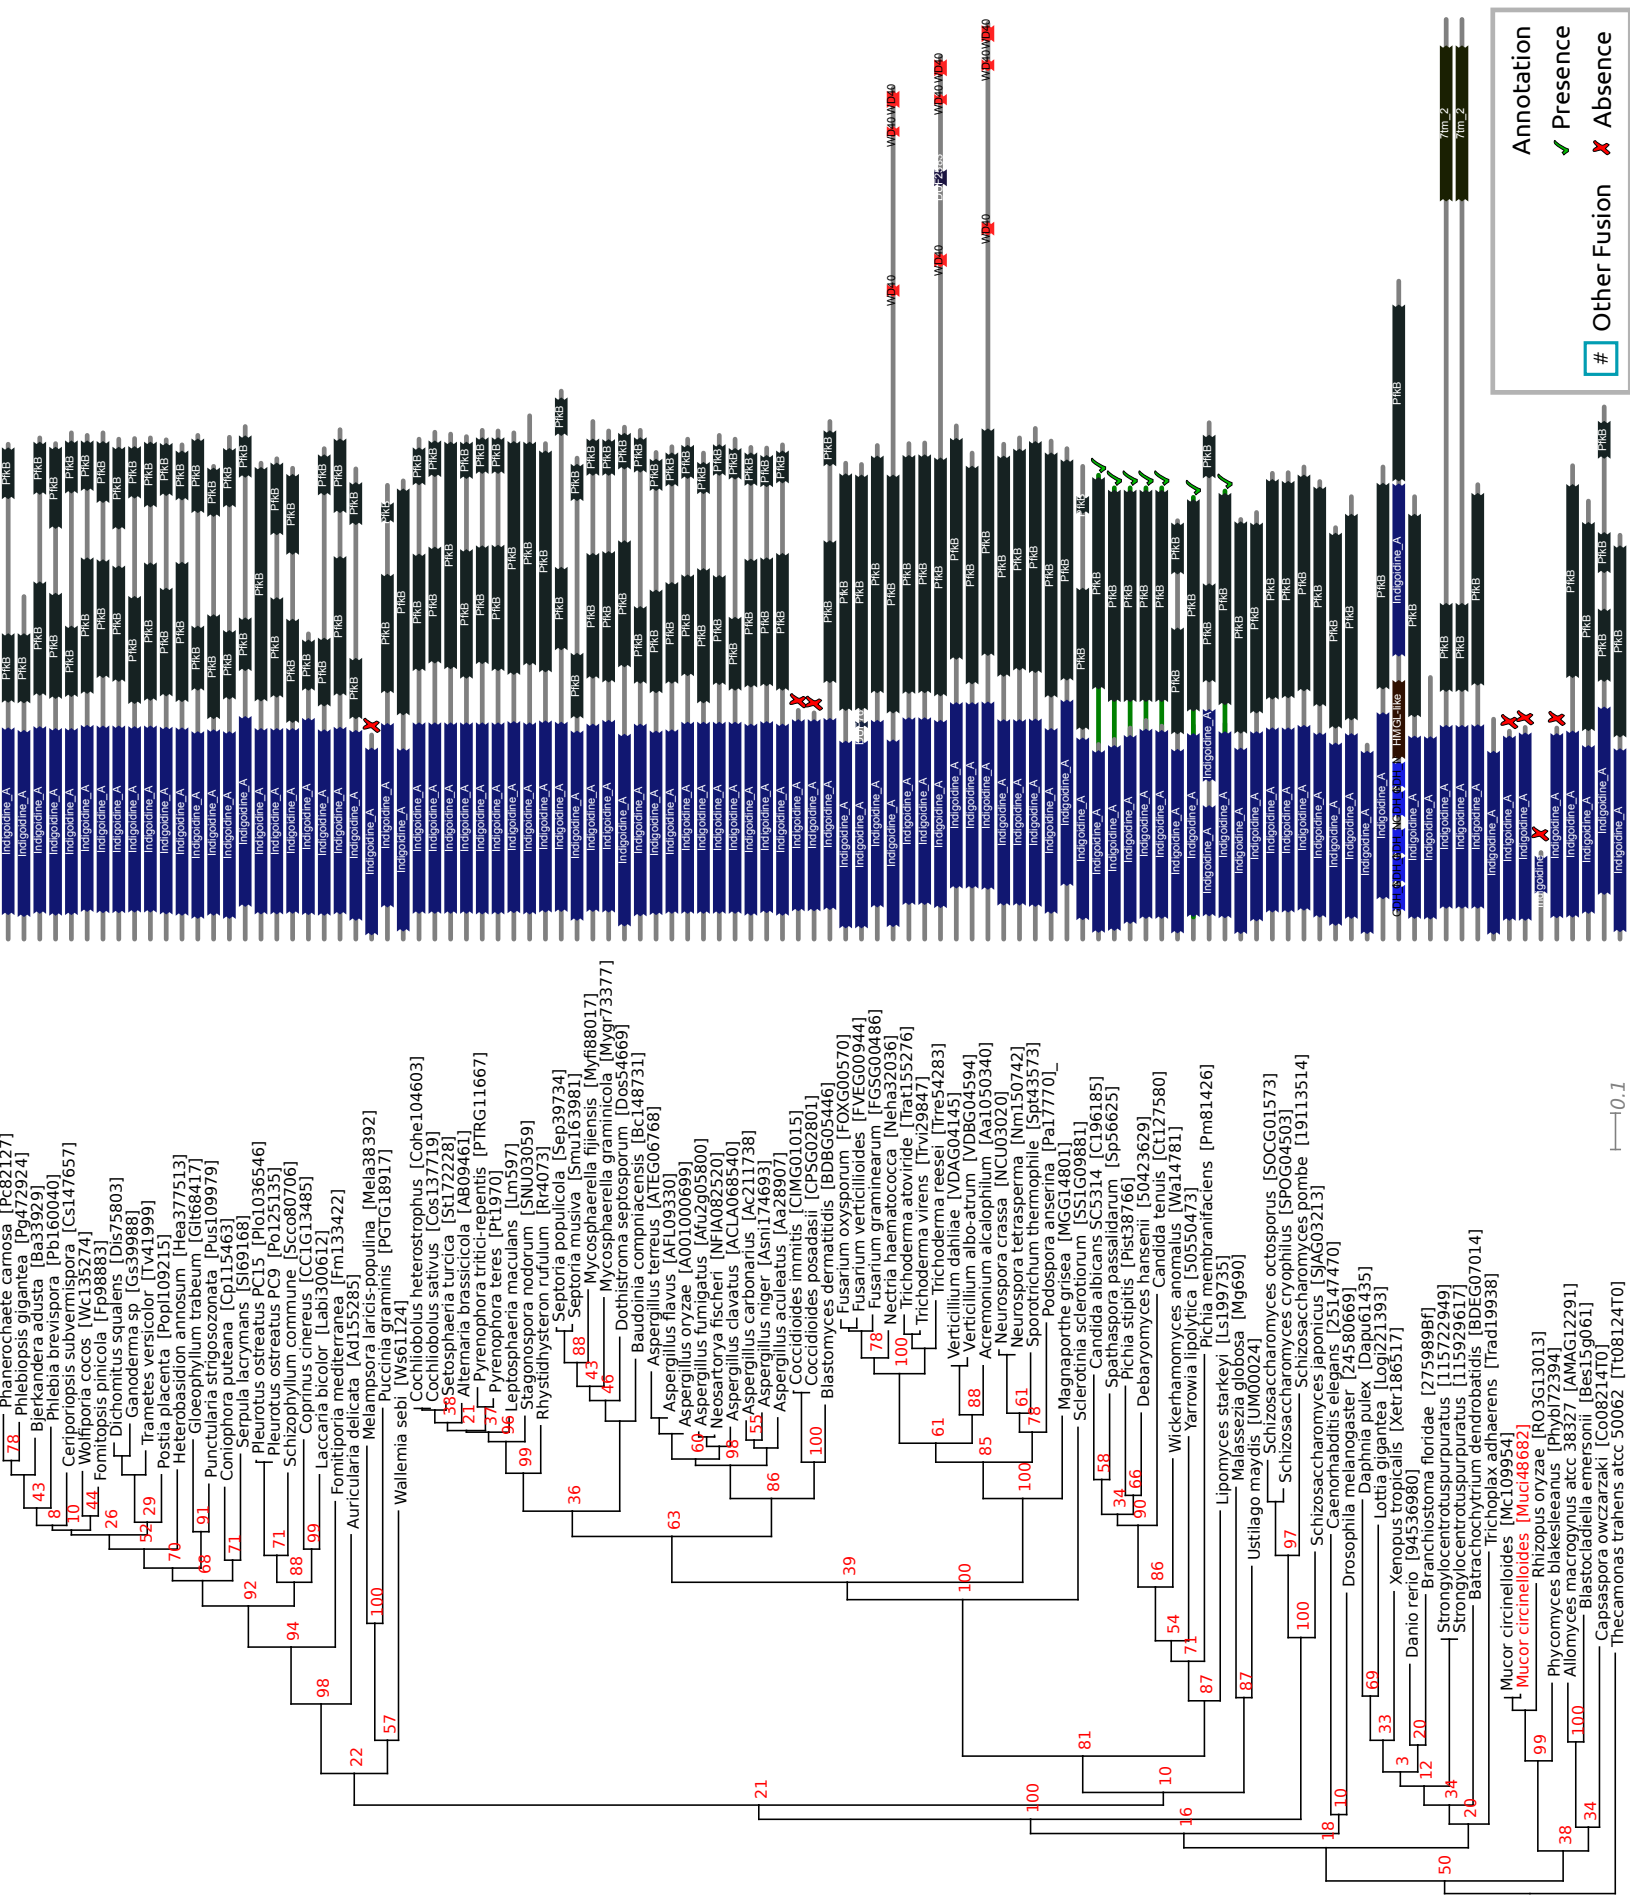

Annotation

✓ Presence

✗ Absence

# Other Fusion

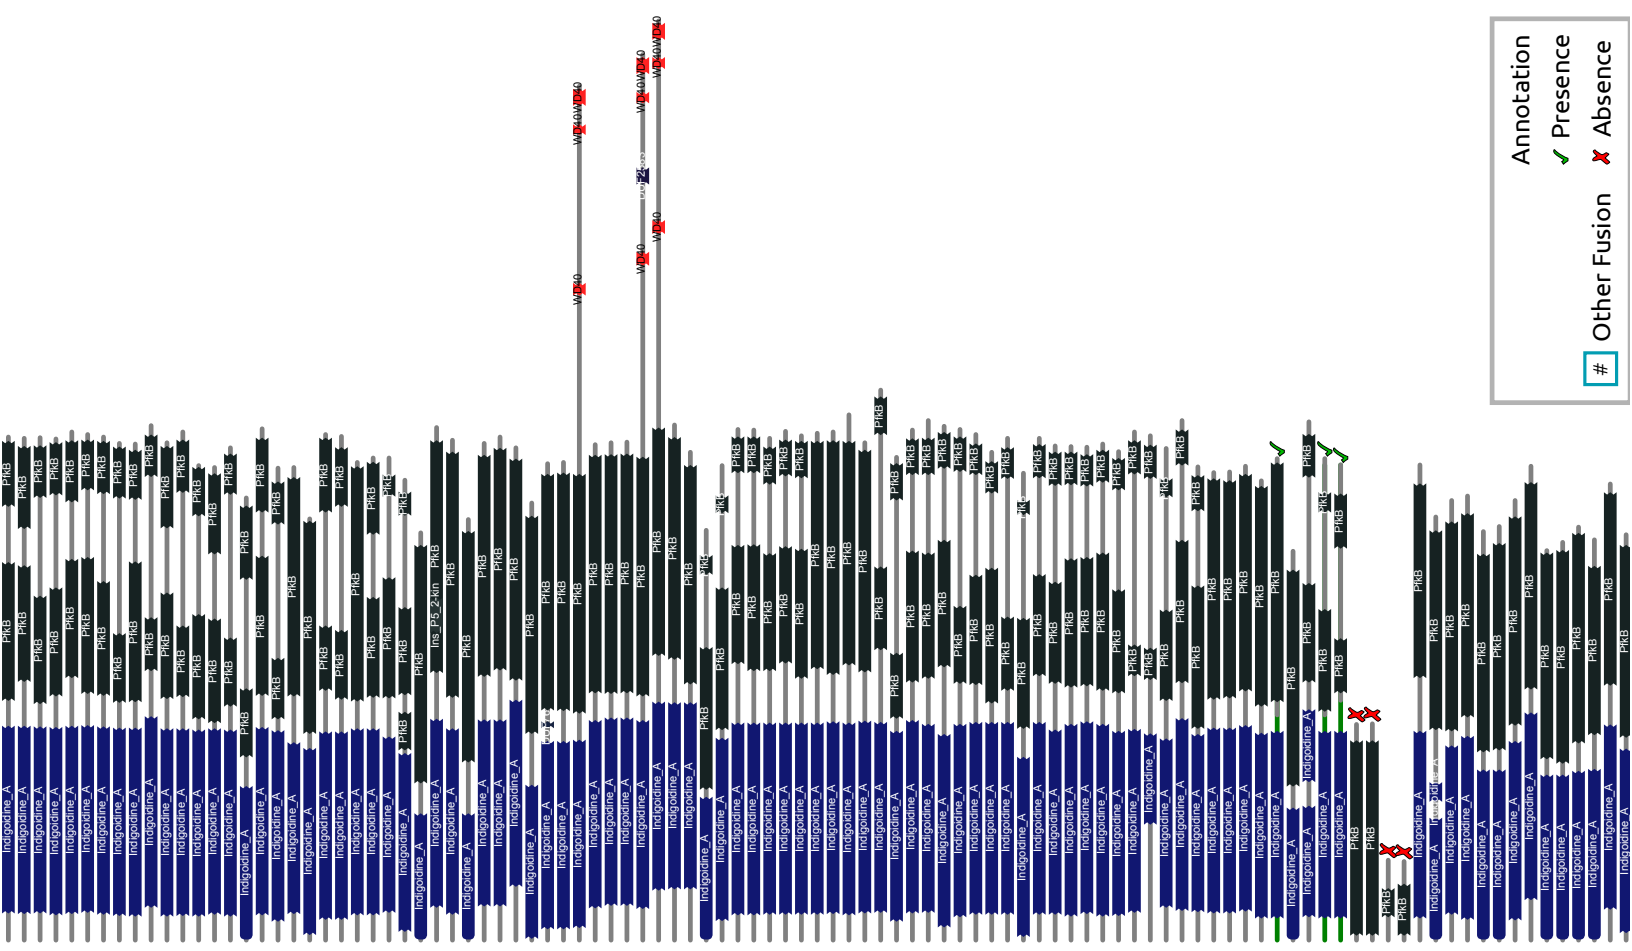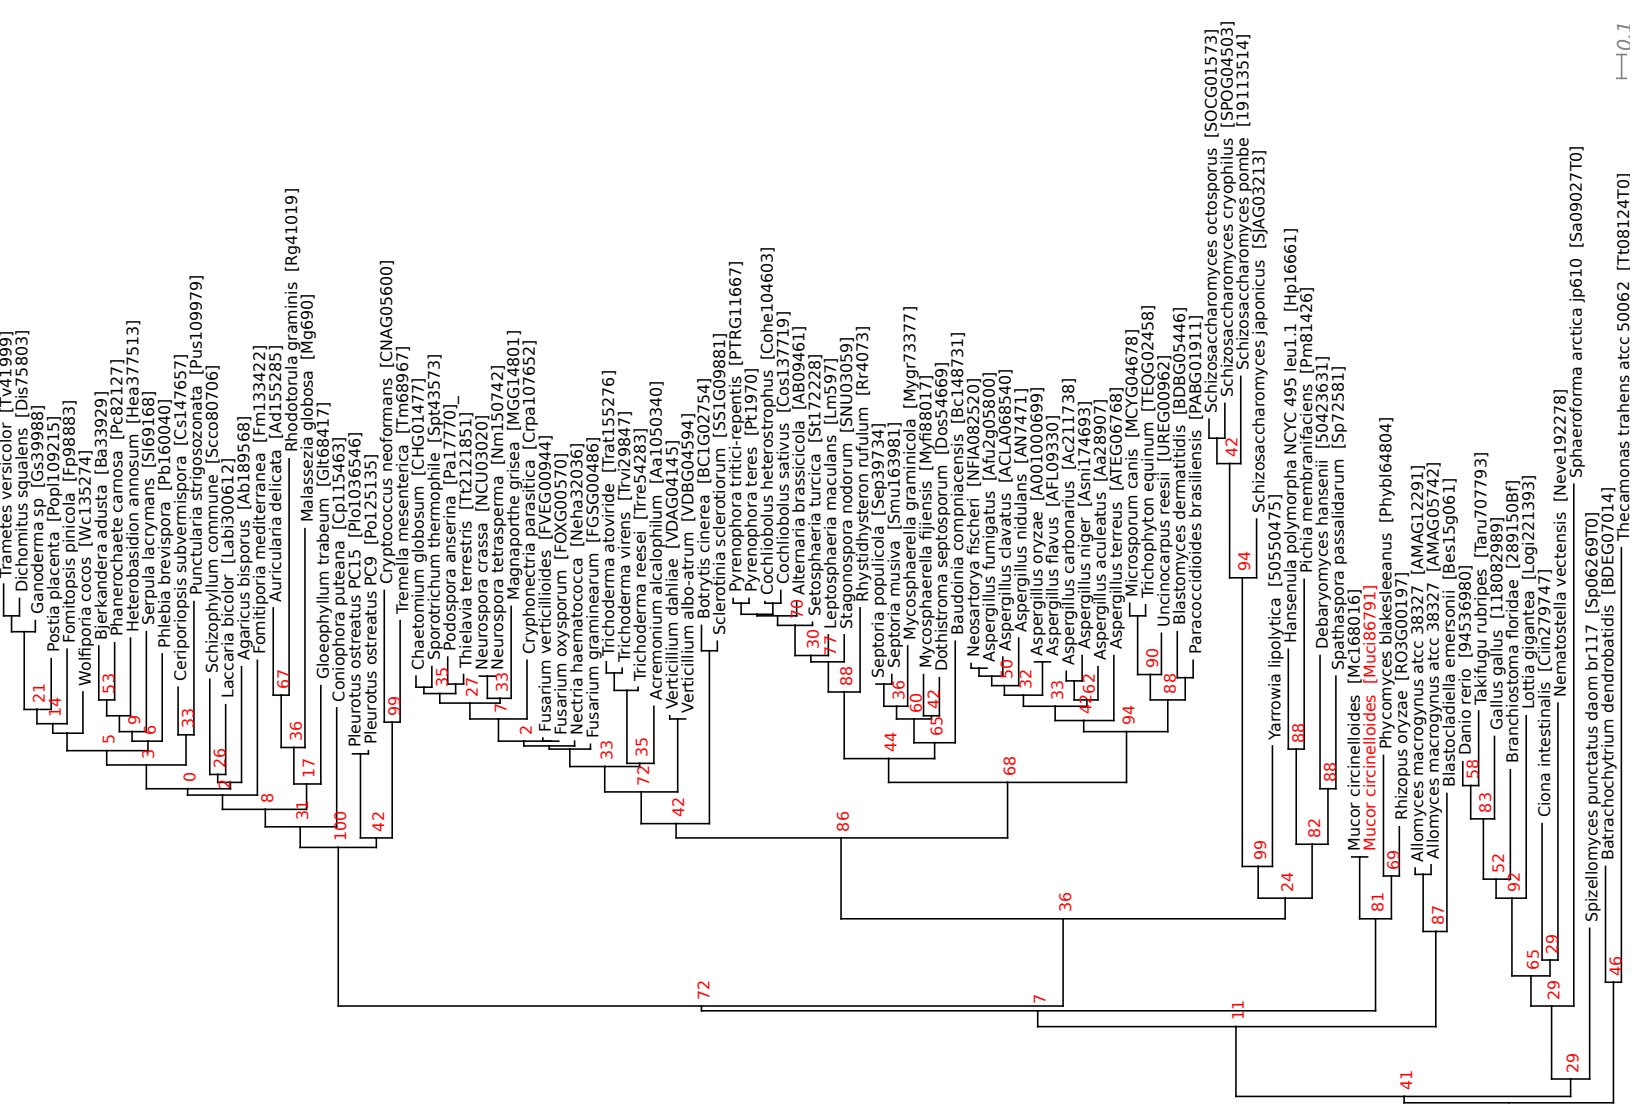

Annotation

Presence ✓

Absence ✗

# Other Fusion

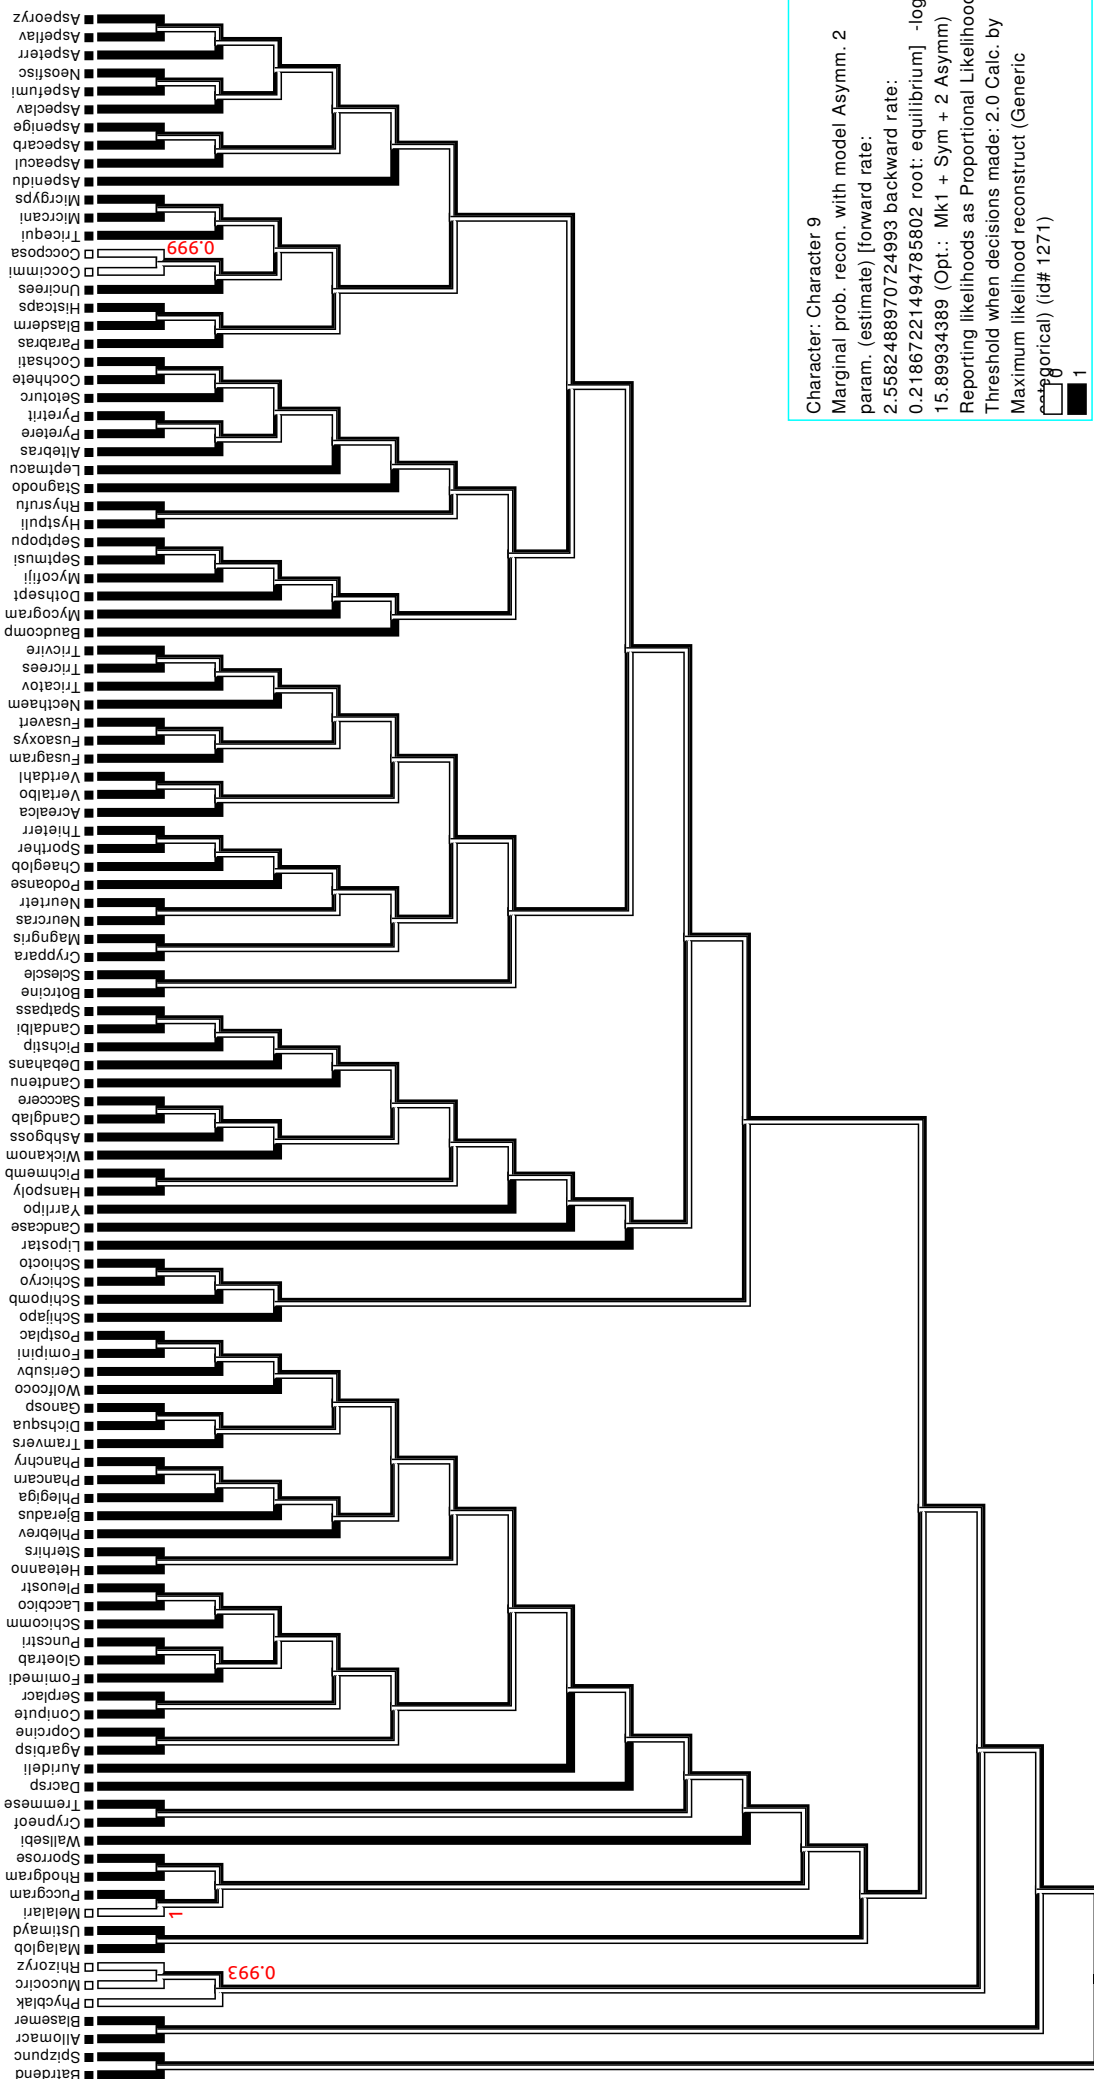

Modified from Tree1++



# Putative Fusion 10

September 26, 2012

## 1 Fasta Sequences

These are the unfused sequences identified by fdfBLAST belonging to the putative gene fusion in FASTA format. Accessions may be shortened, but belong to either the taxons individual genome project or NCBI's accession numbering.

```
>lcl|CC1G01201 unnamed protein product
MLDQTLWLVAIFQVLTLTQTVVGYRWSPQYDALEGLLYEGRRRDGSNLASIQHPCKNRPGSRASIGAEWLRLAYHDVATH
NIETGTGGLDASIAFELDRAENFGNGMHESIEDFETFPSKYISRADVIAIGTILGVASC GGPIIPFRGGRIDALSADVAG
VPEPHQDLEHTHEIFRRRQGFSSQEEMIGLVACGHTMGGVRSDFPDIVPPQDDSERFADFDDTHEFDNDVVVKYIDGTTQN
PLVVHANMTLNSDLRIFESDGNATMRRLASPEDFSSTCGTLLEKMLNVVPSNVVLTTEEITMLPVKVTDAHLTIENEQLVF
KASLRIAQPISAPNKNRLVKIFWCDRYGANKDCENRTGKTAGVASSPRIDDPQVSPPLTFRAGFQFVHYDFIVPIDTEESL
SKFWFEVDEKDGTKPKRHDNDGEGYVLQQDNVIYVPRLSISFNREDRTQKTYIITAGVKSGASPSRVYMSAFDSATDAF
STIIDEDVDMALNETLPSAAGYTFYSASIESPGTQLTVDLHAVIDGETYTEDYMQTFFVAGRTPSTKPTNVTIVDIVPPT
KDLDSATANILSLDIIIGLLLSAFIF
>lcl|CC1G00884 unnamed protein product
MKHRHTSGNSSSTAGEKAKANGTAGGMGGEKREYEQQLSVVKKVRACKVTEYYEILSVKRDCEAEIKKAYRKLALALH
PDKNGAPGADEAFKLVSKAFQVLSDPQKRAIYDSSGADPESRFGGMSSSSPSFSTASPFAGGHAGFGDEISPEELFNMFF
GGGPGFSAGFGGPGTATFSFGPGMTFTTNSGGFARRRAAAPNANANMEPRSLLIQLLPLILLFAFSILSALPSIFSEPPV
PDPRFSFTNTRQYNAQLETGKLGVPYVNPTEFTAHPVIGPELAKAGVKIGKQGEELKSGKESDSVKLRGKGKGRGPAMT
KFEDNVEGIYTHDLRVQCHRGRERLERLRDAEIGIFGIGTDWEKVKKIESEVIPSCEELKRLGVLR
```

## 2 Annotated Phylograms

All trees were generated from an initial run of Darren's Orchard pipeline against 139 taxa (Table S1), using the above corresponding un-fused sequences as BLAST seeds. The alignments were then checked for any missing taxa, manually masked and then ProtTest3 was run, please see the Methods section for detail. The final trees were generated by the following command:

```
phyml -i alignment_file -d aa -b 100 -m model -c 8 -v invariant_sites -s BEST --quiet
-a gamma
```

Styling and annotation was made possible by Dendroscope and Inkscape.

### 2.1 Important Notes

There is only one phylogeny here as one domain consists of a series of repeats and so an alignment would not be possible as the resulting phylogeny would likely be unresolved.

## 3 Mesquite Cladogram

This tree is the 68-gene concatenated phylogeny (Fig. 1), with the presence of a fusion (black), presence of a fission (white), and absent/undetermined (grey) status of gene fusion characters plotted on to it using a "1/0/-" nexus-style data matrix. We used the program 'Mesquite' to calculate proportional likelihoods based on either an "Mk1" or "Assym. 2 param model." (see Table S4) of character change across the fungal phylogeny (Fig. 1). This allowed for a proportional likelihood of the position of the fusion/fission to be calculated.

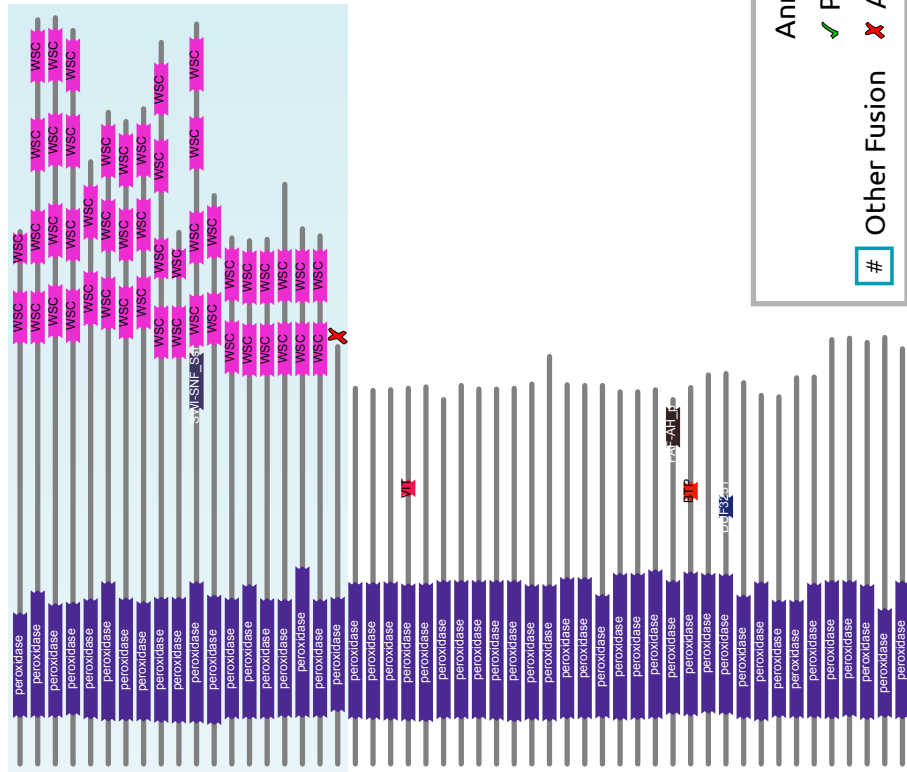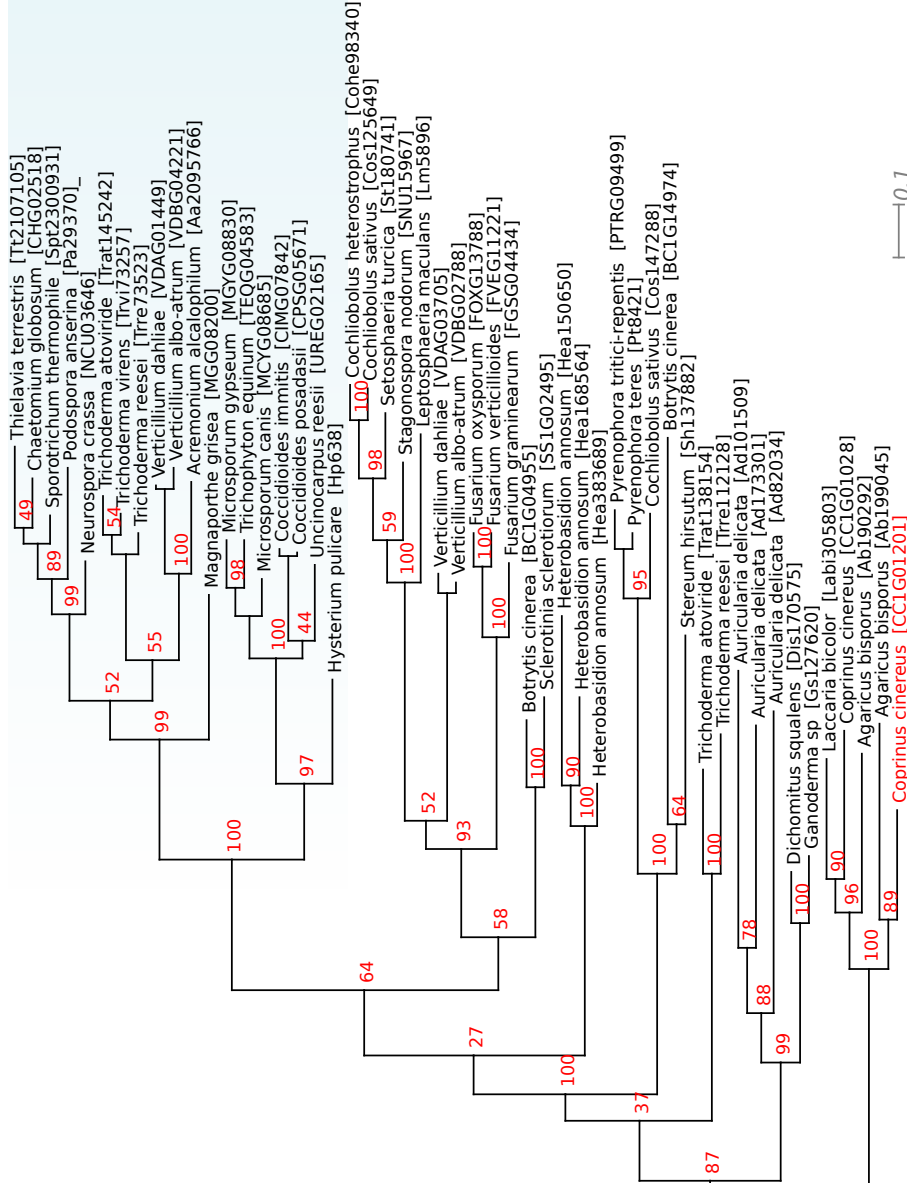

Annotation

✓ Presence

✗ Absence

# Other Fusion

—|0.1

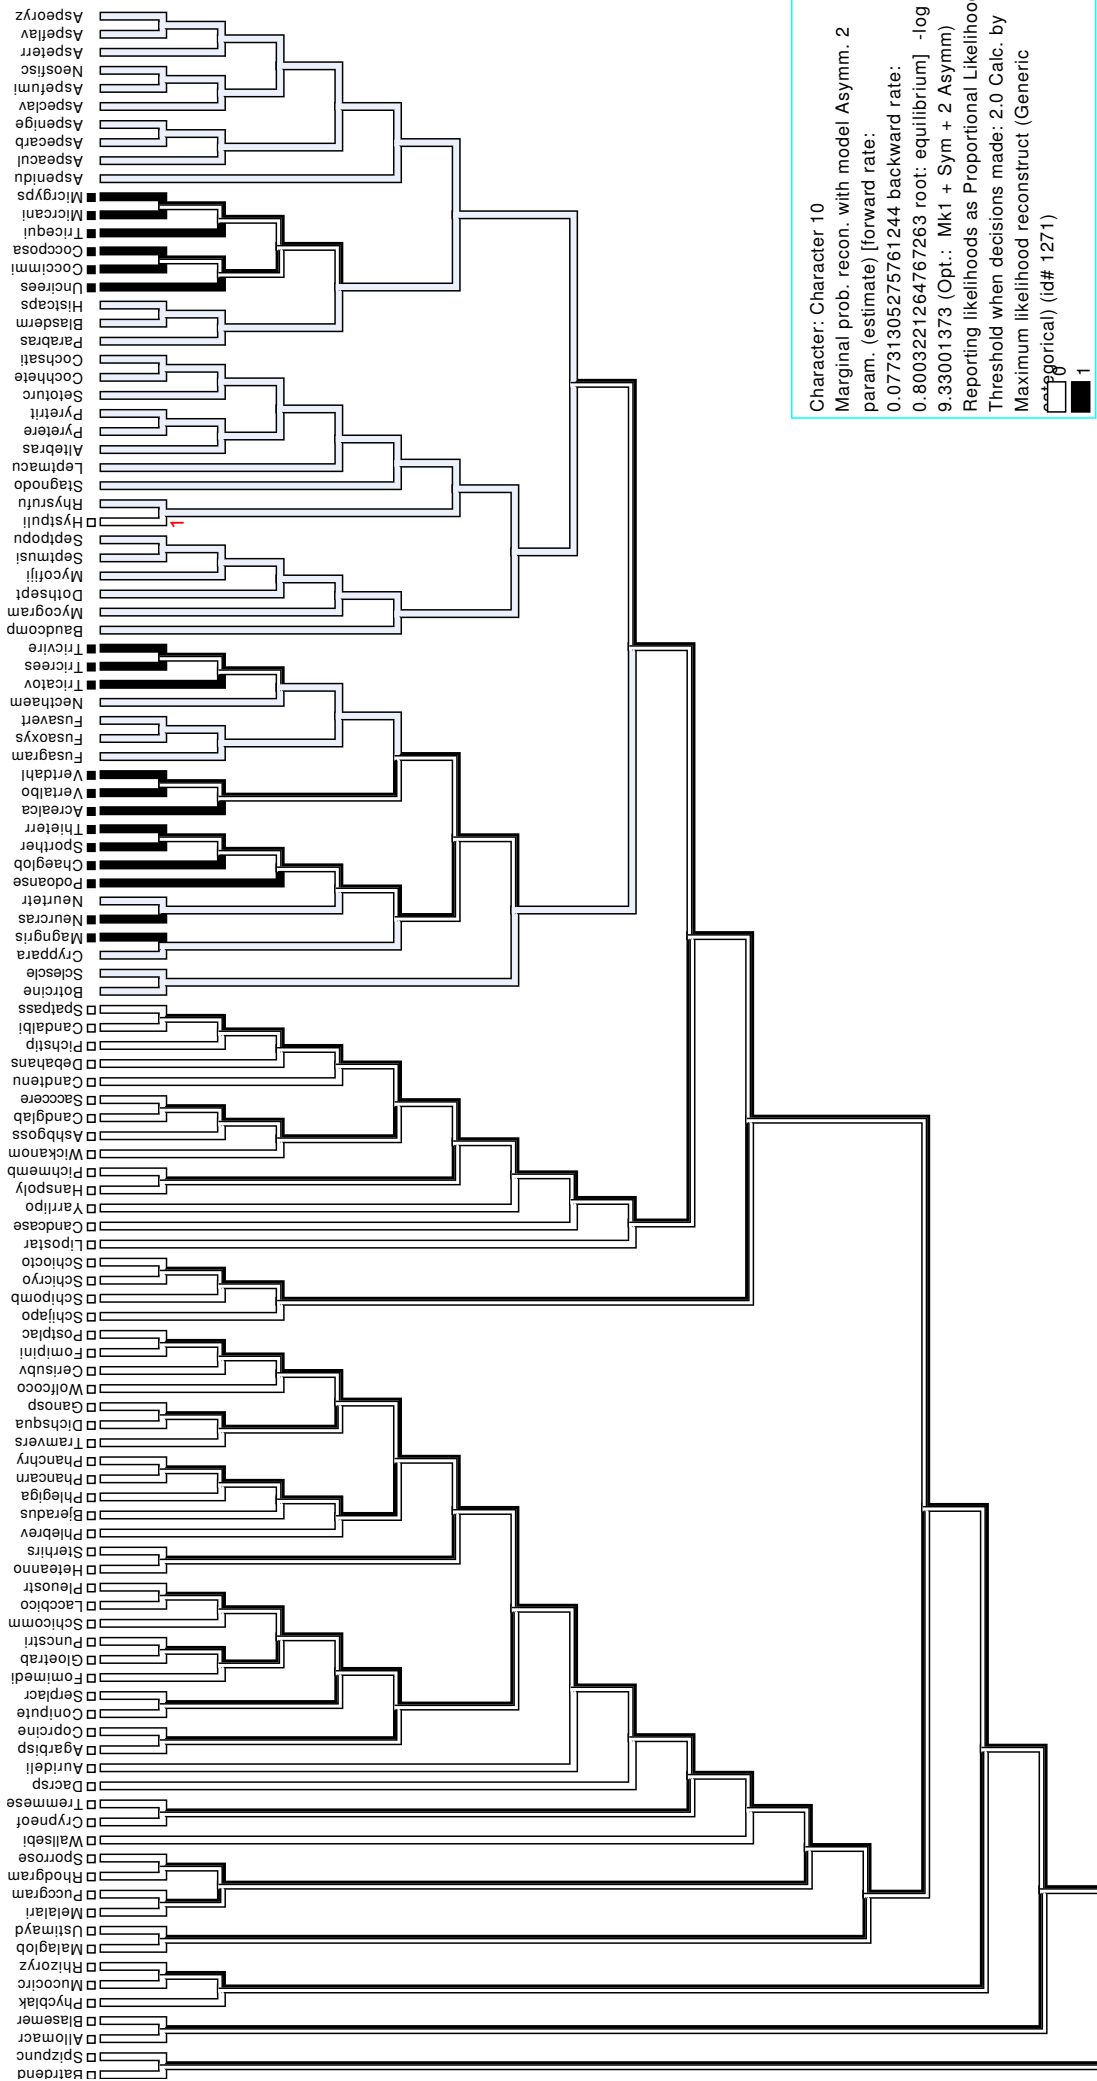

Modified from Tree1++

# Putative Fusion 11

September 26, 2012

## 1 Fasta Sequences

These are the unfused sequences identified by fdfBLAST belonging to the putative gene fusion in FASTA format. Accessions may be shortened, but belong to either the taxons individual genome project or NCBI's accession numbering.

```
>lcl|6322220Sc unnamed protein product
MKFFSLADEAEFKSIIISKNAVDVIGSKLGGQVVSFSDEWFASAENLIQPTAPIRDPTRFVHSGAWYDGWETRRHNEME
YDWVVIKMGVAAAHIIGGEIDTAFFNGNHAPFVSI EALYDEGEEGNIVEDDSRWVEIVEKFECGPSQRHLFVRGNGLTKE
RFTHIKLKMYPDGGIARFRLYGRVVPPELKT KDHIIDLAYVCNGAVALKYSDQHFGSVDNLLL PGRGHDMSDGWETKR SR
QPGHTDWA VIQLGRESSFIEKIIIVDTA HFRGNFPQFITVEGCLKESESSENTGEGTWVELVGKSKTGPDK EHVYEIRKSI
RVSHVKLTIIPDGGVKRIRVWGY
>lcl|6322223Sc unnamed protein product
MVTVVAETLTKESFEEYGTIISPDEEISRMQNLEKGANQGTAIKLLQVSQVENKSTSKVPNWNLFRCFPQPHLNRVFTQG
SNQAIHSIKVLEKHPCSTQTFVPMGR TSAEVAYLVVVAKEIGNK PDLSTLRAFTCLGNQAVTYGLGTWHAPMIVLGKEE
HLDFSVLIYESLDPDRPEKDCVEEHYSDGDVCI I I
```

## 2 Annotated Phylograms

All trees were generated from an initial run of Darren's Orchard pipeline against 139 taxa (Table S1), using the above corresponding un-fused sequences as BLAST seeds. The alignments were then checked for any missing taxa, manually masked and then ProtTest3 was run, please see the Methods section for detail. The final trees were generated by the following command:

```
phym1 -i alignment_file -d aa -b 100 -m model -c 8 -v invariant_sites -s BEST --quiet
-a gamma
```

Styling and annotation was made possible by Dendroscope and Inkscape.

## 3 Mesquite Cladogram

This tree is the 68-gene concatenated phylogeny (Fig. 1), with the presence of a fusion (black), presence of a fission (white), and absent/undetermined (grey) status of gene fusion characters plotted on to it using a "1/0/-" nexus-style data matrix. We used the program 'Mesquite' to calculate proportional likelihoods based on either an "Mk1" or "Assym. 2 param model." (see Table S4) of character change across the fungal phylogeny (Fig. 1). This allowed for a proportional likelihood of the position of the fusion/fission to be calculated.

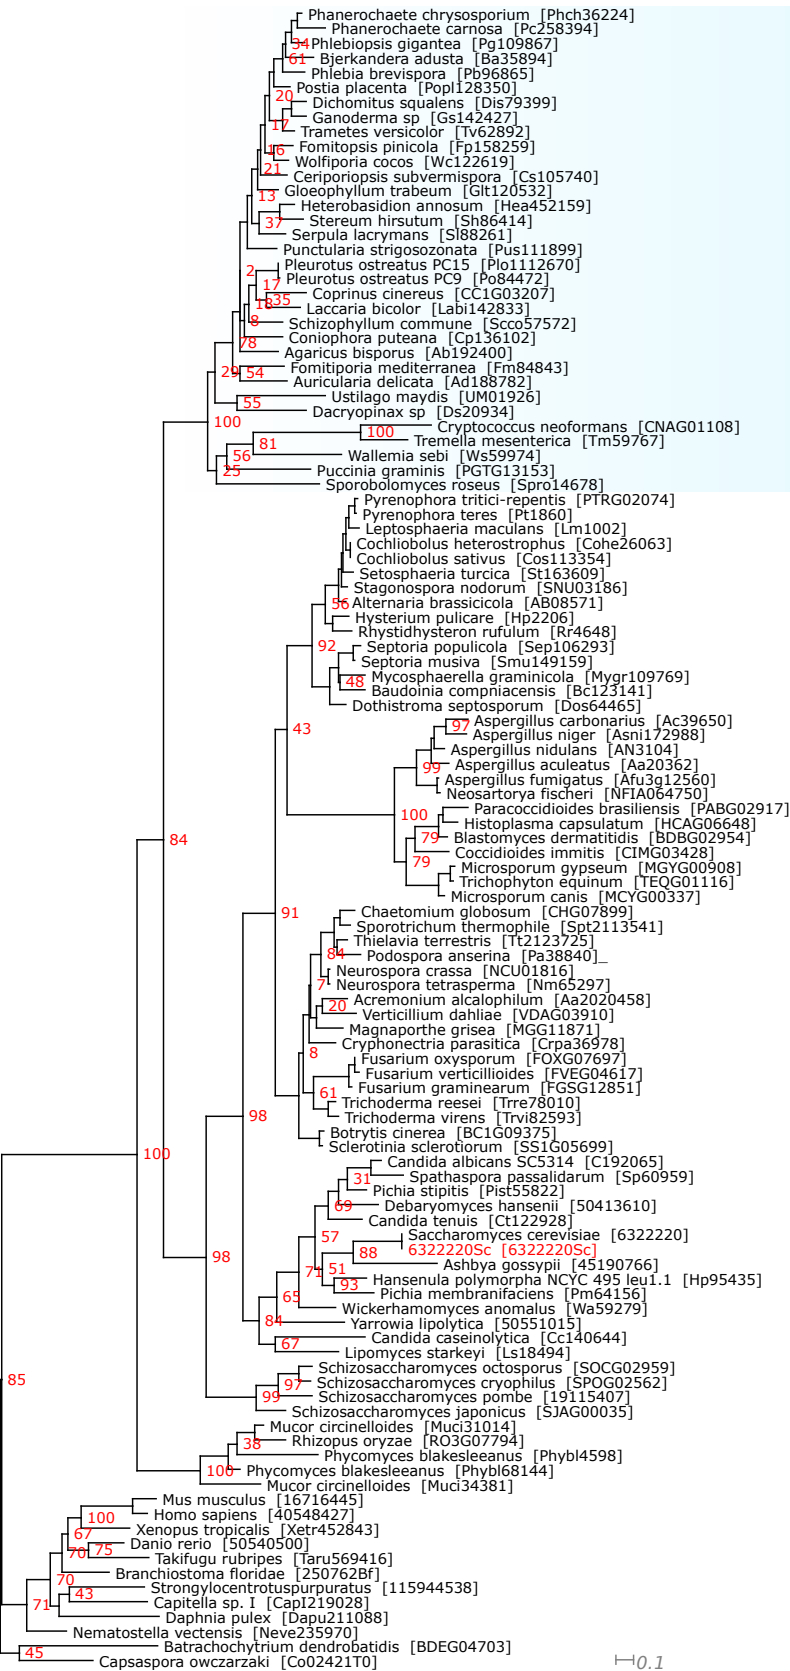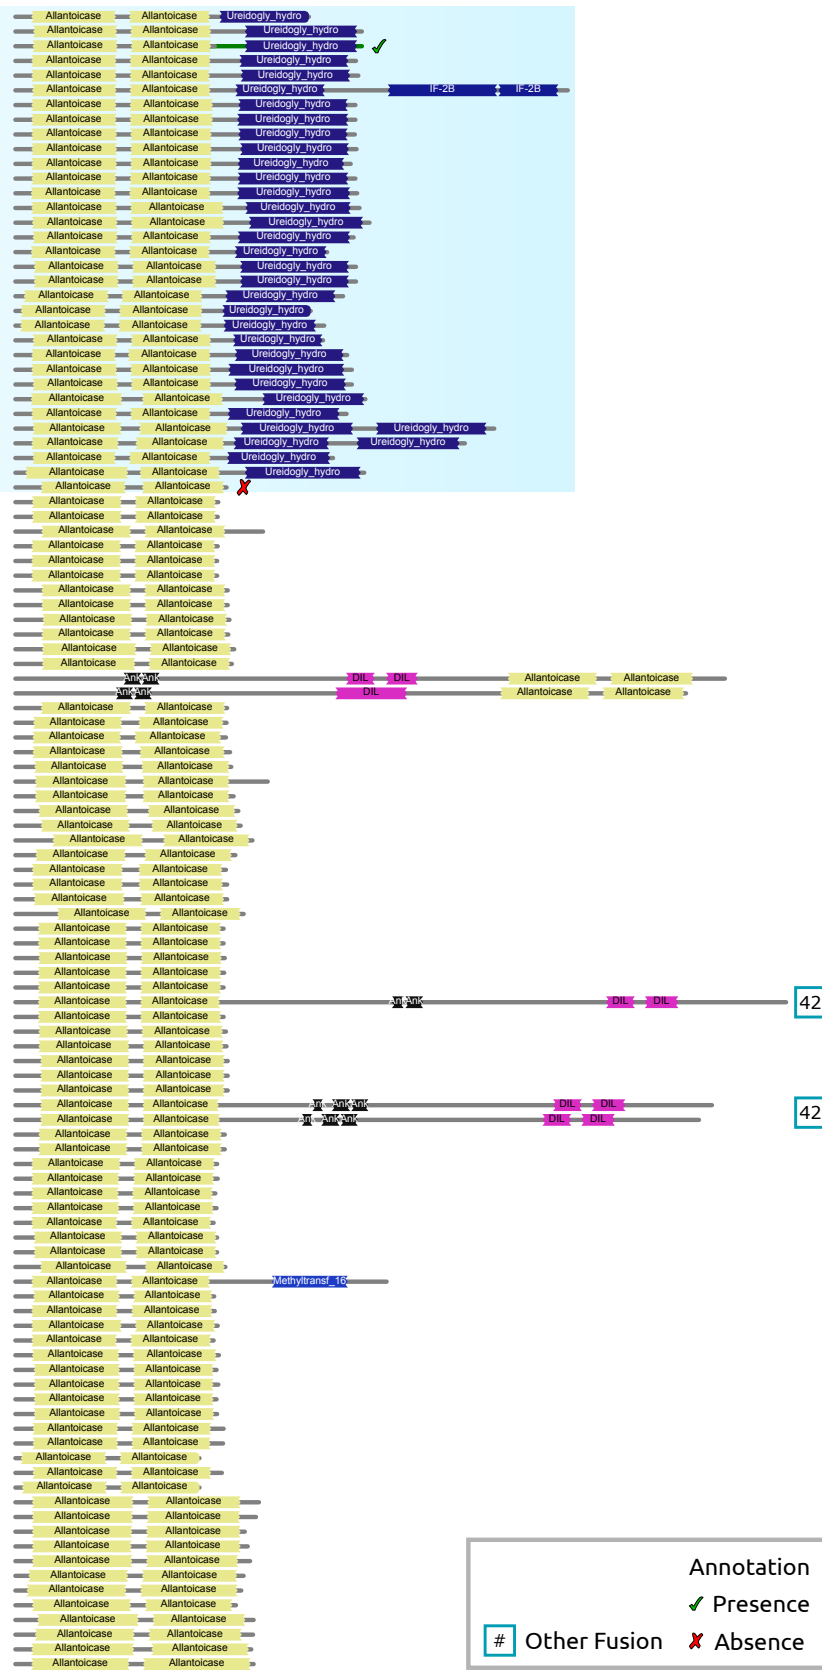

Annotation  
 ✓ Presence  
 # Other Fusion  
 ✗ Absence

1-0.1

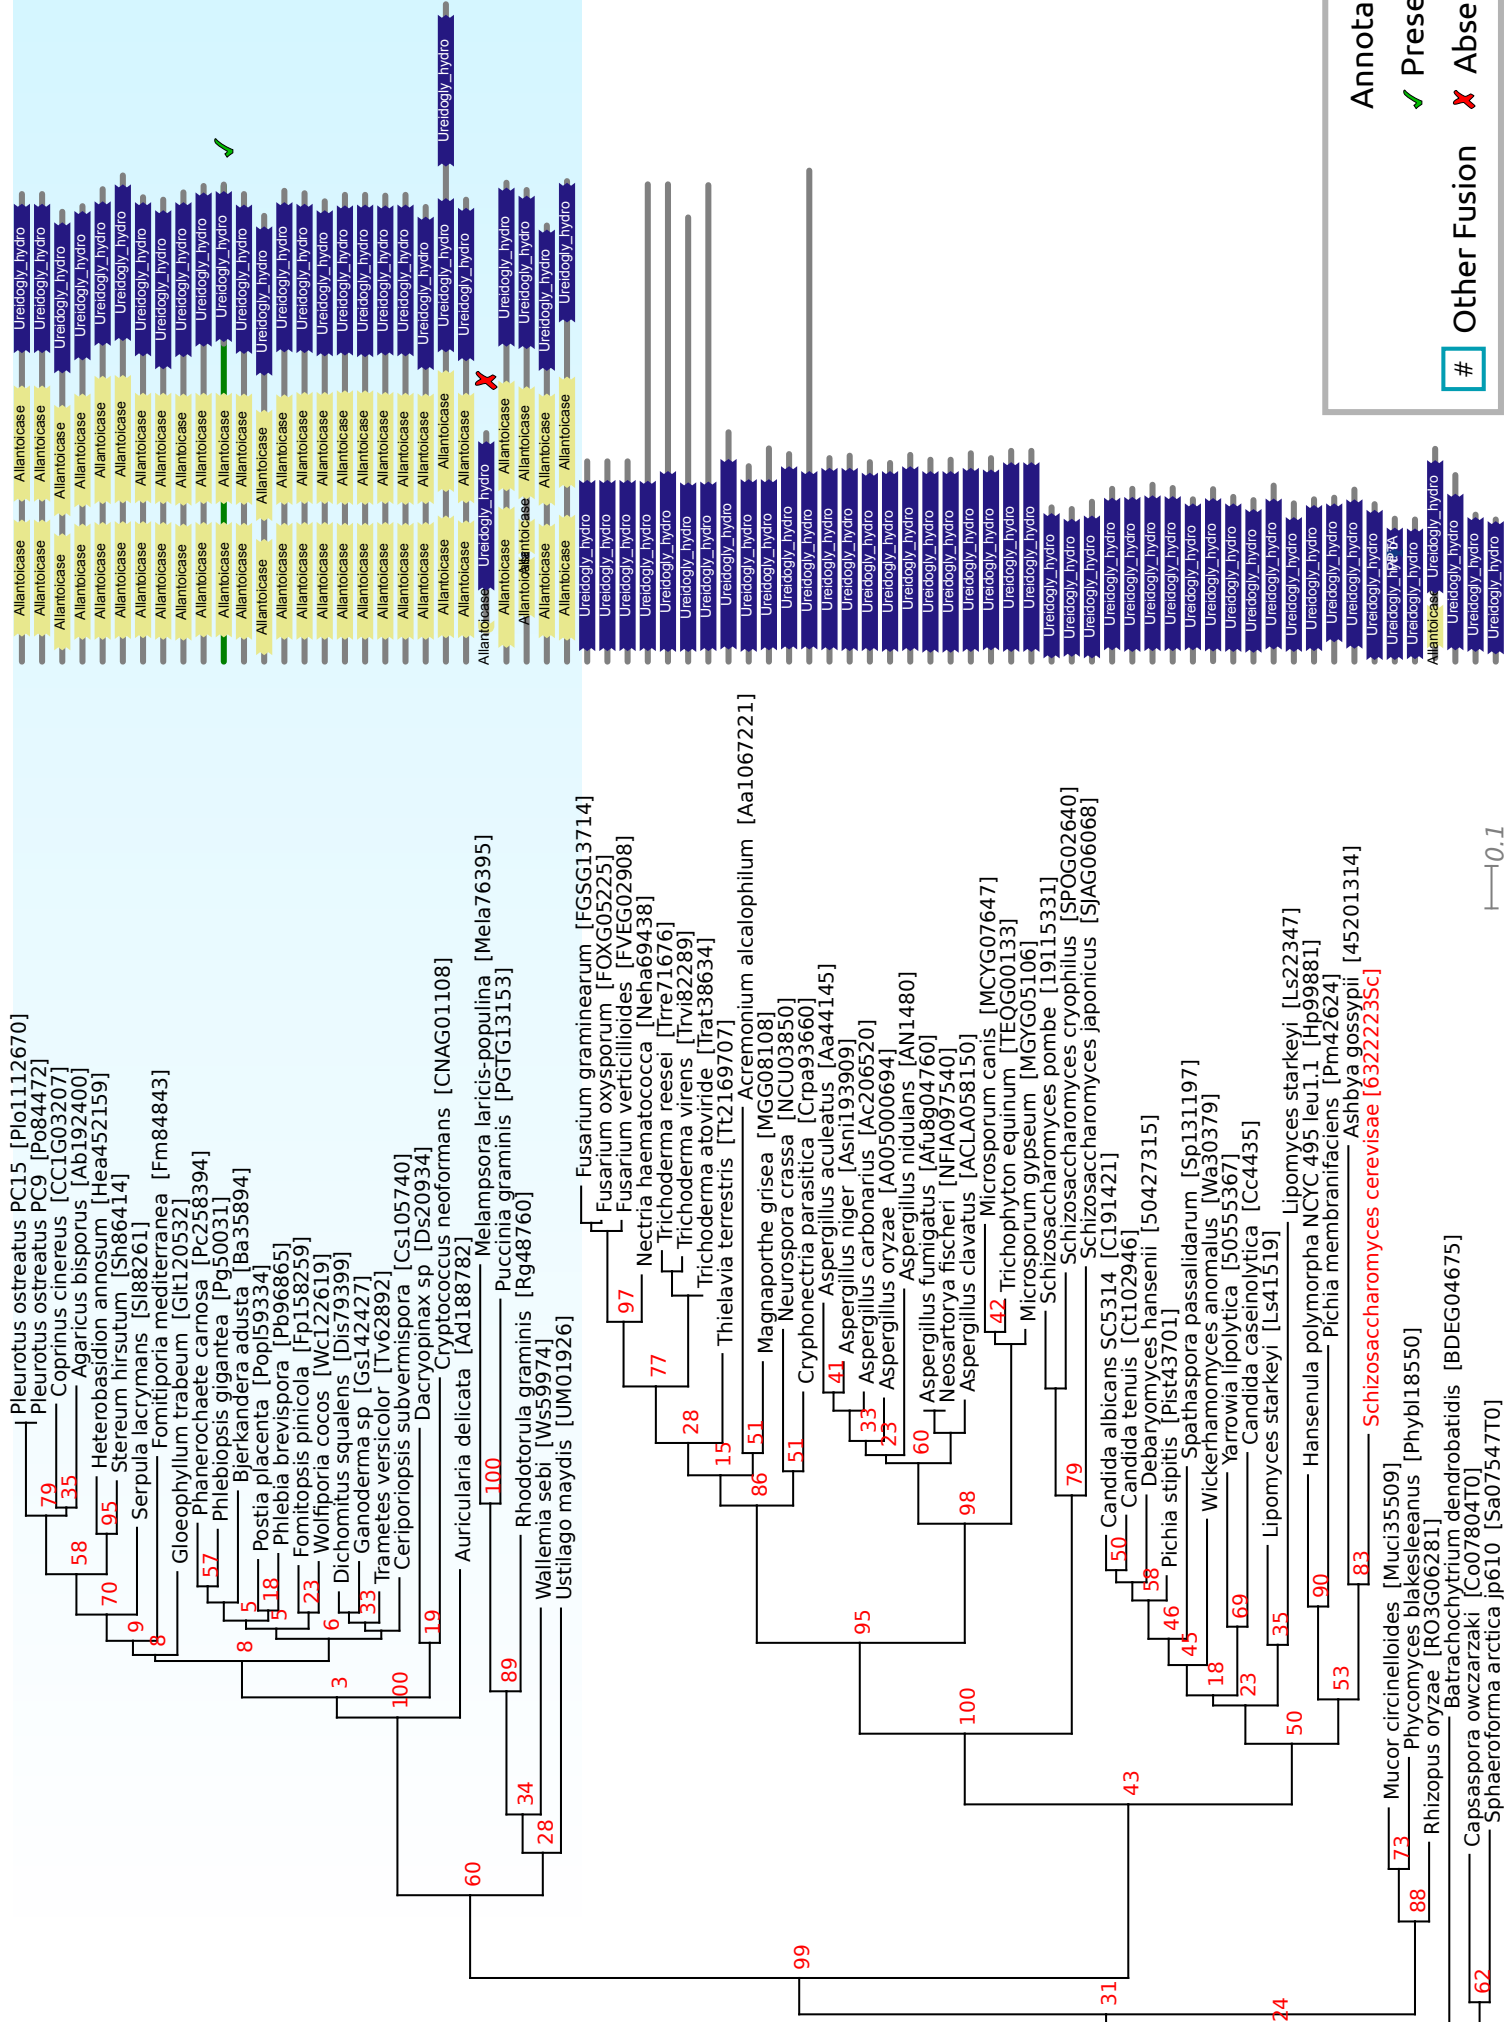

**Annotation**

- ✓ Presence
- ✗ Absence
- # Other Fusion





# Putative Fusion 12

September 26, 2012

## 1 Fasta Sequences

These are the unfused sequences identified by fdfBLAST belonging to the putative gene fusion in FASTA format. Accessions may be shortened, but belong to either the taxons individual genome project or NCBI's accession numbering.

```
>lcl|AMAG_02423 unnamed protein product
MDLFSTLHPSQASTPSVFELVAQEQLHNLLSPALRSVLASYAIRYPRYLRLVLFHDELFALLMLVVQRHYLRYSKASFA
ESFYGLKRARTVVVPYLKQQLHELHREWSTELGTDVLGDESDSGSESDTESVELPATPATAAARRRRTKLRFLKIYPLV
HFVYTGTHLVYQLLYMFDWTRYYSPLLHVLGVEVKRVTSADMRAMQRIAASAPPRTGLAAAGHVALEALKVGLPVAIFFS
KFLDWFATTDYARQERRRVPISPPPPRVQDPKGVPLPKDPRTCPCCRAVTNAAALPTGVVYCYPCVFRAVQDNGVCPV
TRKPVVVGDIRRVFQSQ
>lcl|AMAG_14666 unnamed protein product
MKFGKQIQNQAITEWSQYYINYKALKKVINSLKSQLHDGTPNGGSASATSASHSITIAASPVLLDSEPPSFADAHTDPI
QAHKAAFFYKLERELDRVNAFYLTKETDLKVRLRSLLLEKKRLAQGSQAVRGTHAAKNHGANLRITIQEALWHLQQDLTKLQ
QFVALNAEGFRKILKKWDRKSKSSTKELYLSRQVEIQPCFNDRDTLTELTDIVSTHLAELSLMDLAAVASPAPGPVLGAGA
TTALARSDSLDDLESDLAHVVKAGATDRLRDLTLARLRTASPAQATTAVVSRVLRACRQGGAKAADAVAVLVESGFADVH
YRDEINDRTALHAATLAGDVAVIRTLTLAGADGAARDVYGRTPHYAAMHGFTEVAVLVGGLDRIPEVEDAEGANEDDDDR
SVCVAPDHDGFSPLIYAIIGGFTDIVAKLLDQHPQLLQTTVPHHVLSLAAQYGHVDIATLLAKGAPIAPEEGLHPLHIT
AKQGHVTLTKLLCDHMASVDTSDKYYNWTPLFYAASEGHQDCVEVLLEYGASTNLVDETGWTVLTHTLYRGHIAIAVVLW
EHMQRKAMHPPSATASPALFLAANATPAVIQPIAPSGLLRPRTNTAPAVPAAADDADGDPMDFDAIPSLALPPPIIPFR
IYGHTYLESKYQVQIAVPVAPVLYAQKLASLRVLAAKPDGPVAVPHTLILPADDEREAVAFQAANLDVFSLHIDVFPTYG
TRPIARA AVLARDLVRARHGETLGADPSSHAPTHGRVVVPLFDAMNVVGETLTDYALIAPFNHPKLAVGGPIATYWKTTQ
VVSAAAAAGAAATAAAGTRPTGLLAHPHGVSSLMPSPTLPSGGPTTPSGIIPAAHGTVASLITASSLAQKYVHVVVQLTV
DLVPVLYPTWHVTVPVLPVGGVGIQVPVAQLTHAQFQAVGRADPRRVDLASVGLAPSSATLAHALRHAYLSLGEALDALPS
DTALFVELKYPTALDAARHRLPCTASVDVFDKVLTAVDRAAPRALVFASFSPACNAVNWKQPNYPVFFNTWAGYPPE
AADASTALLGIDAPPAVVDADAVPDARCASIKEAIRFTKHNNLLGVVCFARPLIQVPALIQAVKEAGLILATFGAENAVP
QHVLAQEKHGVVSDGVVRFVTTSAAGVI
```

## 2 Annotated Phylograms

All trees were generated from an initial run of Darren's Orchard pipeline against 139 taxa (Table S1), using the above corresponding un-fused sequences as BLAST seeds. The alignments were then checked for any missing taxa, manually masked and then ProtTest3 was run, please see the Methods section for detail. The final trees were generated by the following command:

```
phyml -i alignment_file -d aa -b 100 -m model -c 8 -v invariant_sites -s BEST --quiet
-a gamma
```

Styling and annotation was made possible by Dendroscope and Inkscape.

## 3 Mesquite Cladogram

This tree is the 68-gene concatenated phylogeny (Fig. 1), with the presence of a fusion (black), presence of a fission (white), and absent/undetermined (grey) status of gene fusion characters plotted on to it using a "1/0/-" nexus-style data matrix. We used the program 'Mesquite' to calculate proportional likelihoods based on either an "Mk1" or "Assym. 2 param model." (see Table S4) of character change across the fungal phylogeny (Fig. 1). This allowed for a proportional likelihood of the position of the fusion/fission to be calculated.



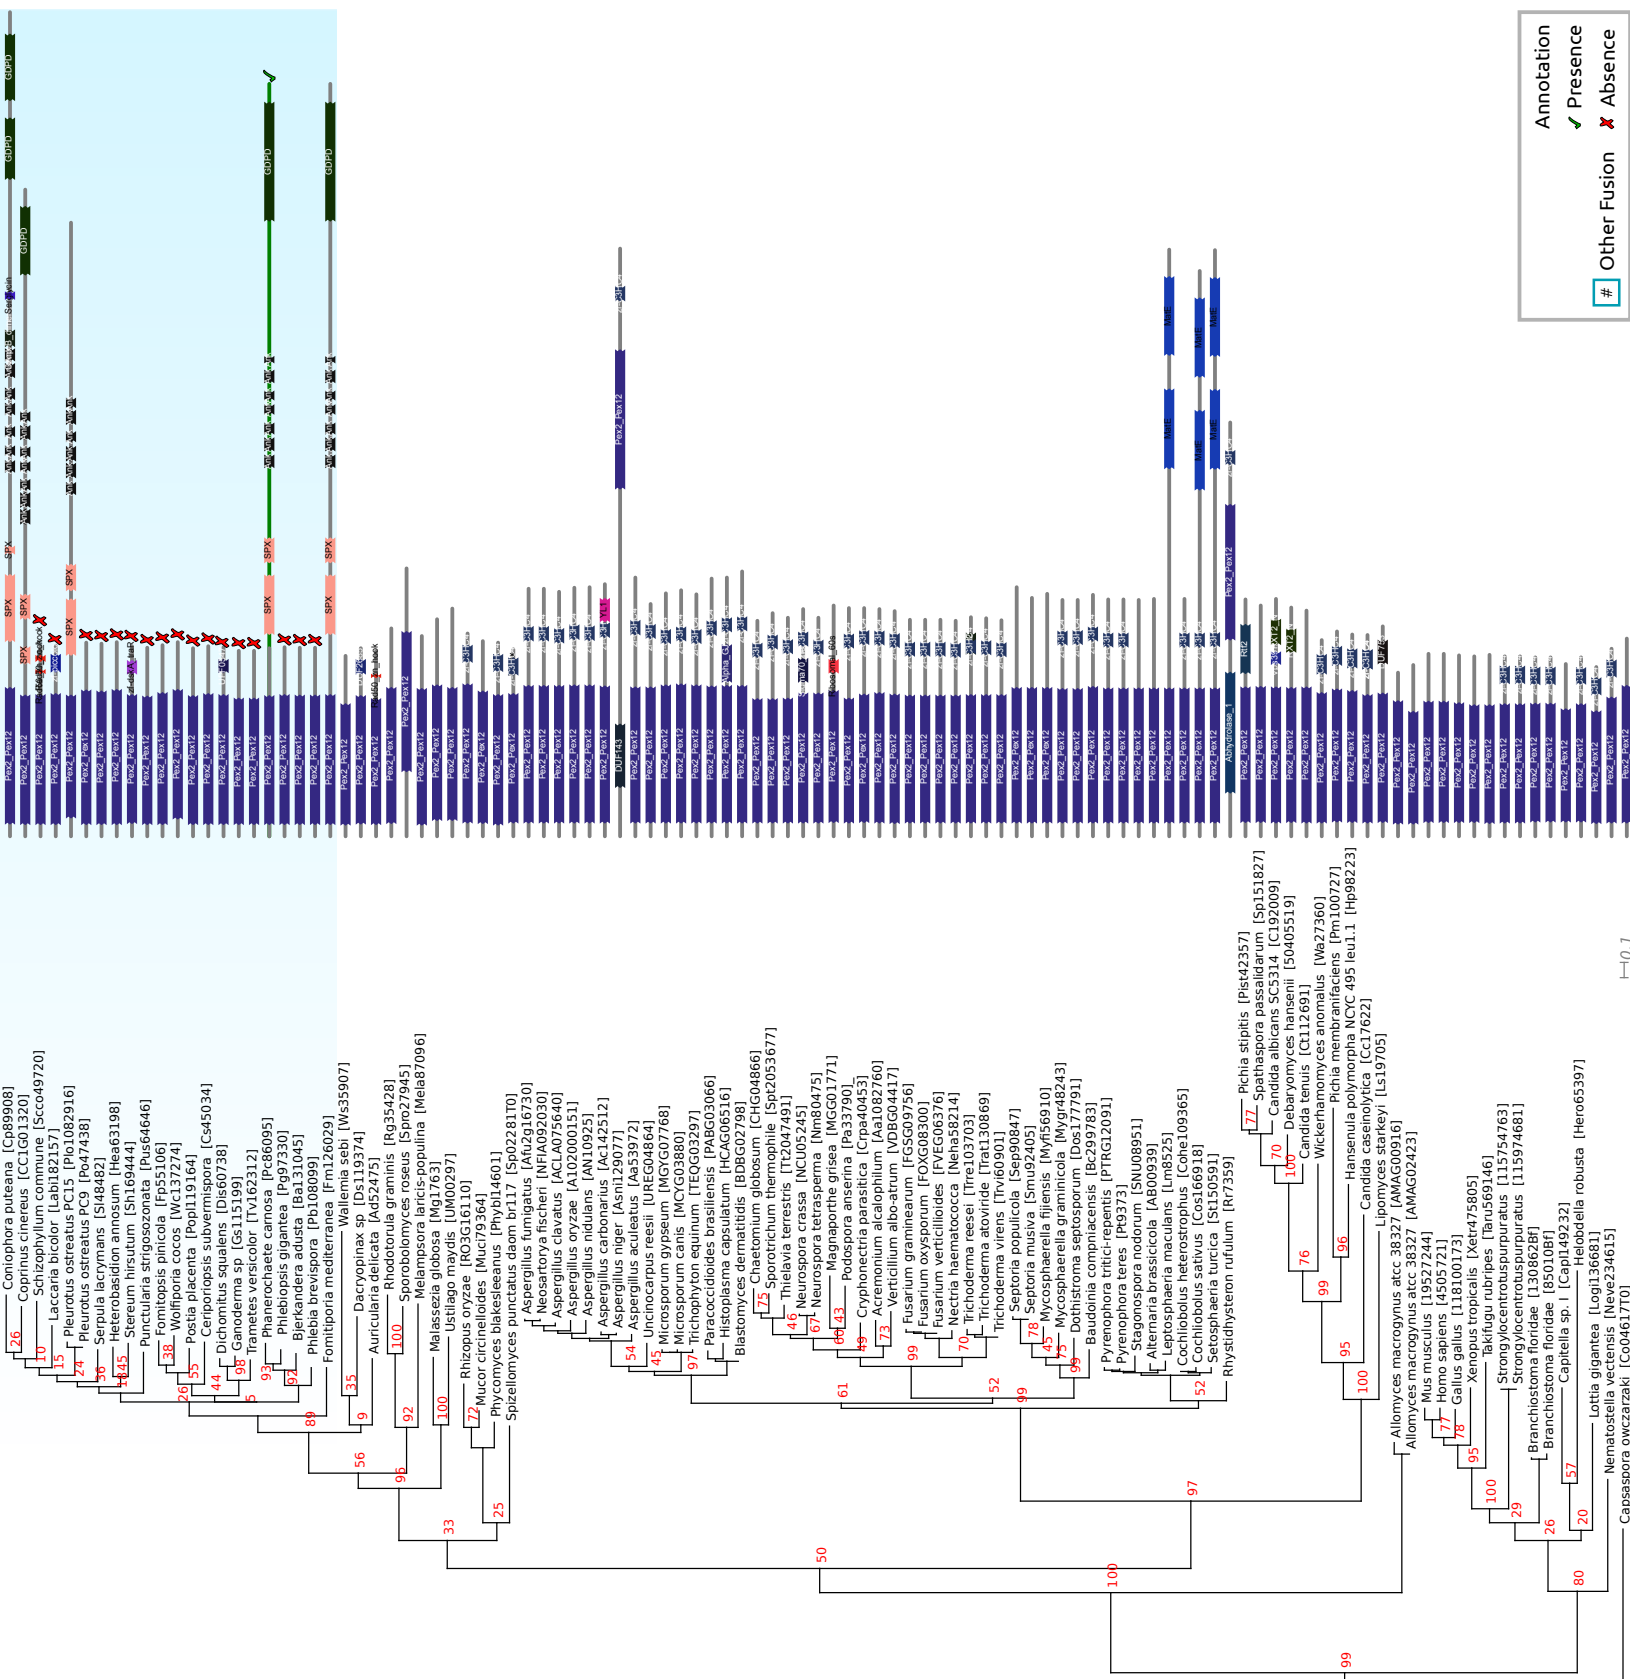

Annotation  
 ✓ Presence  
 ✗ Absence  
 # Other Fusion

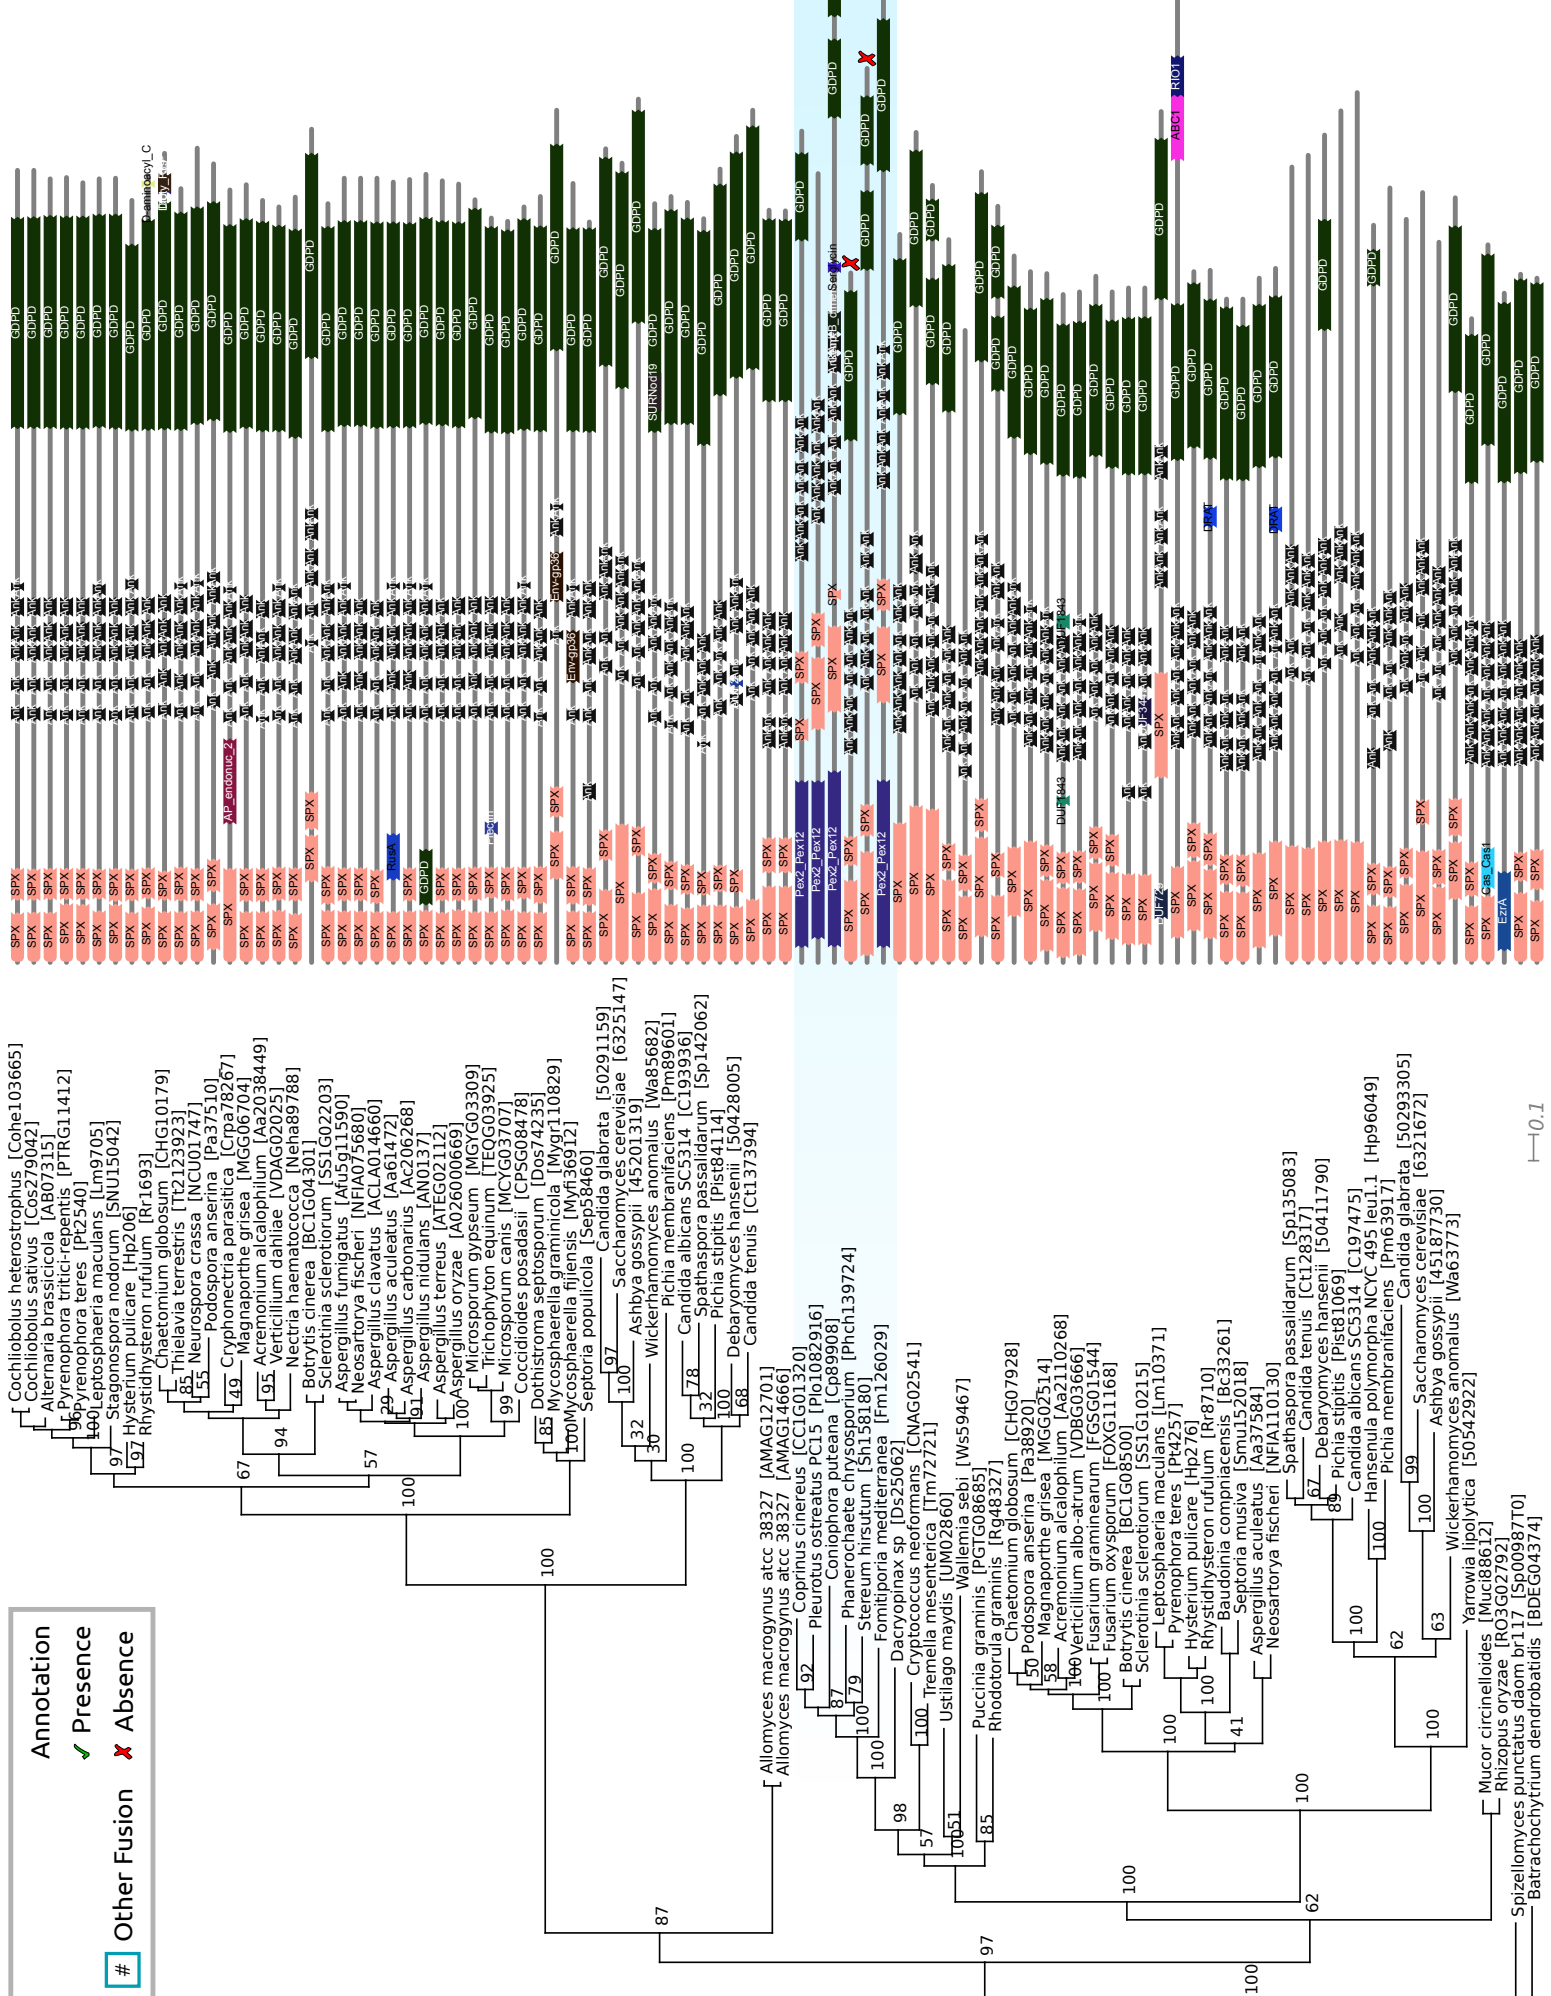

0.1

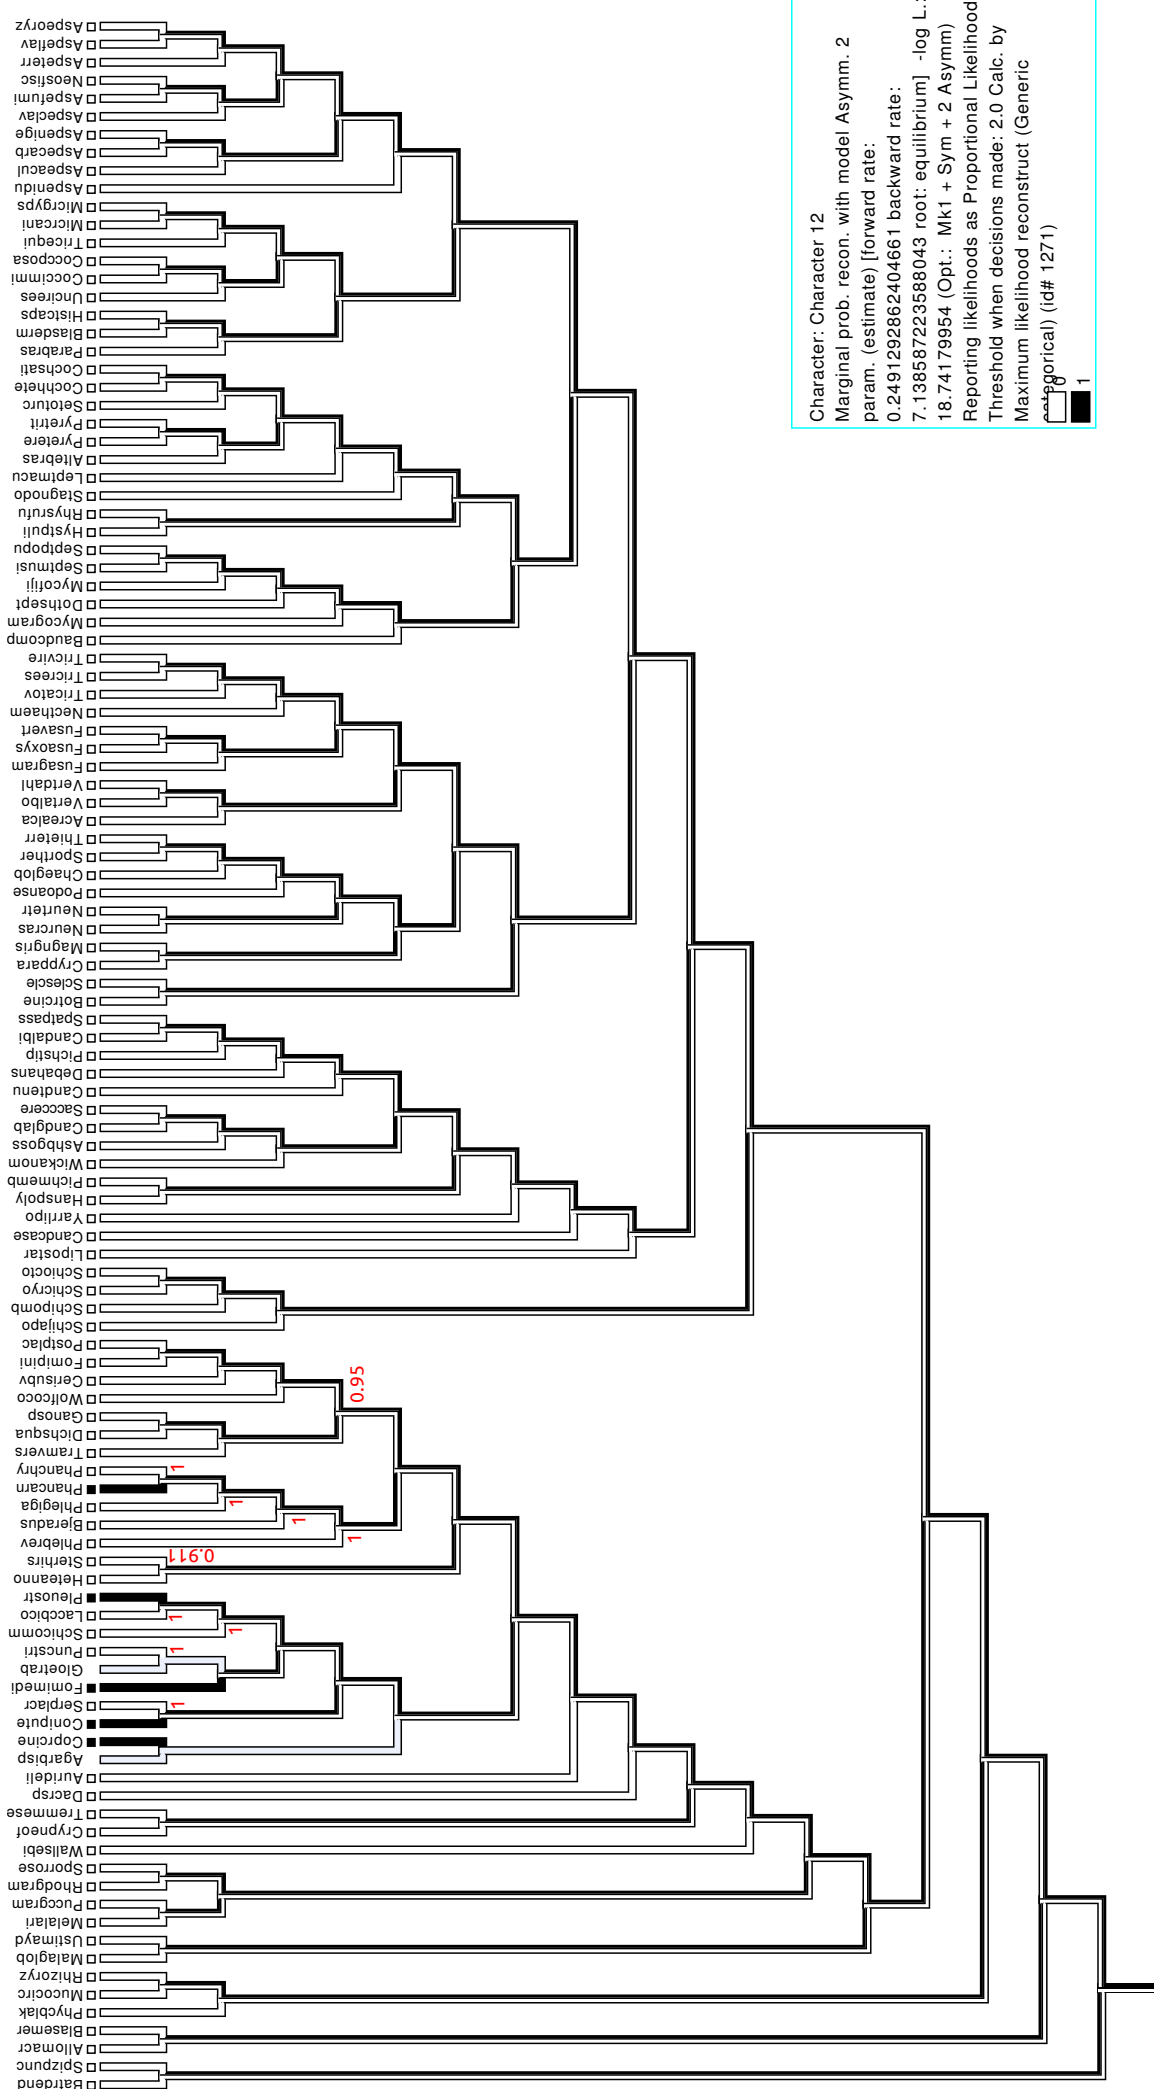

- Rattand
- Spizunc
- Allomacr
- Blasemer
- Phybllak
- Mucocitc
- Rhizoryz
- Malaglob
- Ustimayd
- Melatari
- Puccgram
- Rhodgram
- Sporose
- Wallsebl
- Cypneot
- Tremmese
- Dacrsp
- Auridel!
- Agarhisp
- Coprine
- Conpue
- Serplacr
- Fomimed!
- Gloetrab
- Punctri
- Schicomm
- Laccbico
- Pleuost
- Heteanno
- Sterhirs
- Phlebrev
- Bjeradus
- Phlegma
- Phanchry
- Tamvers
- Dichsqua
- Ganosp
- Wolfcoco
- Certsubv
- Fompmi!
- Postplac
- Schifapo
- Schipomb
- Schichyo
- Schiocto
- Lipostar
- Candcasse
- Yarrilpo
- Hanspoly
- Pichmemb
- Wikanom
- Ashbgoss
- Candglab
- Saccere
- Candtenu
- Debahans
- Pichstip
- Candabi!
- Spatpass
- Botcine
- Schescle
- Cyppara
- Magngfris
- Neuras
- Neutrtr
- Podanse
- Chaeglob
- Sporthr
- Thieterr
- Acrealca
- Vertalbo
- Veridahl
- Fusagram
- Fusaoxys
- Fusavert
- Necthaem
- Tricatov
- Tricrees
- Tricvire
- Baudcomp
- Mycogram
- Dothsept
- Mycotiji!
- Sepimus!
- Sepipopu
- Hyspuli!
- Rhystrfu
- Stagnodo
- Lepimacu
- Aliebras
- Pyeter
- Pyetrit
- Setiure
- Coohete
- Cochsati
- Parabras
- Blasderm
- Histcaps
- Unctrees
- Coccim!
- Cocoposa
- Tricequi
- Micrcani
- Micryps
- Aspensidu
- Aspacul
- Aspacarb
- Aspacige
- Aspaclav
- Aspacum!
- Neostisc
- Aspeterr
- Aspetlav
- Aspetryz

Character: Character 12  
 Marginal prob. recon. with model Asymm. 2  
 param. (estimate) [forward rate:  
 0.2491292862404661 backward rate:  
 7.138587223588043 root: equilibrium] -log L.:  
 18.74179954 (Opt.: Mk1 + Sym + 2 Asymm)  
 Reporting likelihoods as Proportional Likelihoods;  
 Threshold when decisions made: 2.0 Calc. by  
 Maximum likelihood reconstruct (Generic  
 categorical) (id# 1271)

# Putative Fusion 13

September 26, 2012

## 1 Fasta Sequences

These are the unfused sequences identified by fdfBLAST belonging to the putative gene fusion in FASTA format. Accessions may be shortened, but belong to either the taxons individual genome project or NCBI's accession numbering.

```
>lcl|6325326Sc unnamed protein product
MAQEITHPTIVDGWFREISDTMWPQGAMTLKVEKVLHHEKSKYQDVLIFKSTTYGNVLVLDNVIQATERDEFAYQEMIAH
LALNSHPNPKKVLVIGGGDGGVLRVVKHDSVEEAWLCDIDEAVIRLSKEYLPEMAASYSHPKVKTHIGDGFQFLRDYQN
TFDVIITDSSDPEGPAETLFQKEYFQLLSALTEKGVITTTQAESMWHLPPIIKDLKKACSEVFPVAEYSFVVTIPTYPTGT
IGFMVCSKDKT CNVKKPLREISDEKEAELYRYYNKKIHEASFVLP TWA AKELN
>lcl|6324378Sc unnamed protein product
MGKNVLLLGS GFVAQPVIDTLAANDDINVTVACRTLANA QALAKPSGSKAISLDVTDD S ALDKVLADNDVVISLIPYTFH
PNVVKSAIRTKTDVVTSSYISPALRELEPEIVKAGITVMNEIGLDPGIDHLYAVKTIDEVHRAGGKLSFLSYCGGLPAP
EDSDNPLGYKFSWSSRGVLLALRNSAKYWKD GKIETVSS E DLMATAKPYFIYPGYAFVCYPNRDSTL FK DLYHIPEAETV
IRGTLRYQGFPEFVKALVDMGMLKDDANEIFSKPIAWNEALKQYLGAKSTSKEDLIASIDSKATWKDDED RERILSGFAW
LGLFSDAKITPRGNALDTLCARLEELMQYEDNERDMVVLQHKFGIEWADGTTETRTSTLVDY GKVGGYSSMAATV GYPVA
IATKFVLDGTIKGPGLLAPYSPEINDPIMKELKDKYGIYLKEKTVA
```

## 2 Annotated Phylograms

All trees were generated from an initial run of Darren's Orchard pipeline against 139 taxa (Table S1), using the above corresponding un-fused sequences as BLAST seeds. The alignments were then checked for any missing taxa, manually masked and then ProtTest3 was run, please see the Methods section for detail. The final trees were generated by the following command:

```
phym1 -i alignment_file -d aa -b 100 -m model -c 8 -v invariant_sites -s BEST --quiet
-a gamma
```

Styling and annotation was made possible by Dendroscope and Inkscape.

## 3 Mesquite Cladogram

This tree is the 68-gene concatenated phylogeny (Fig. 1), with the presence of a fusion (black), presence of a fission (white), and absent/undetermined (grey) status of gene fusion characters plotted on to it using a "1/0/-" nexus-style data matrix. We used the program 'Mesquite' to calculate proportional likelihoods based on either an "Mk1" or "Assym. 2 param model." (see Table S4) of character change across the fungal phylogeny (Fig. 1). This allowed for a proportional likelihood of the position of the fusion/fission to be calculated.

HGT not counted as a reversion in final figures

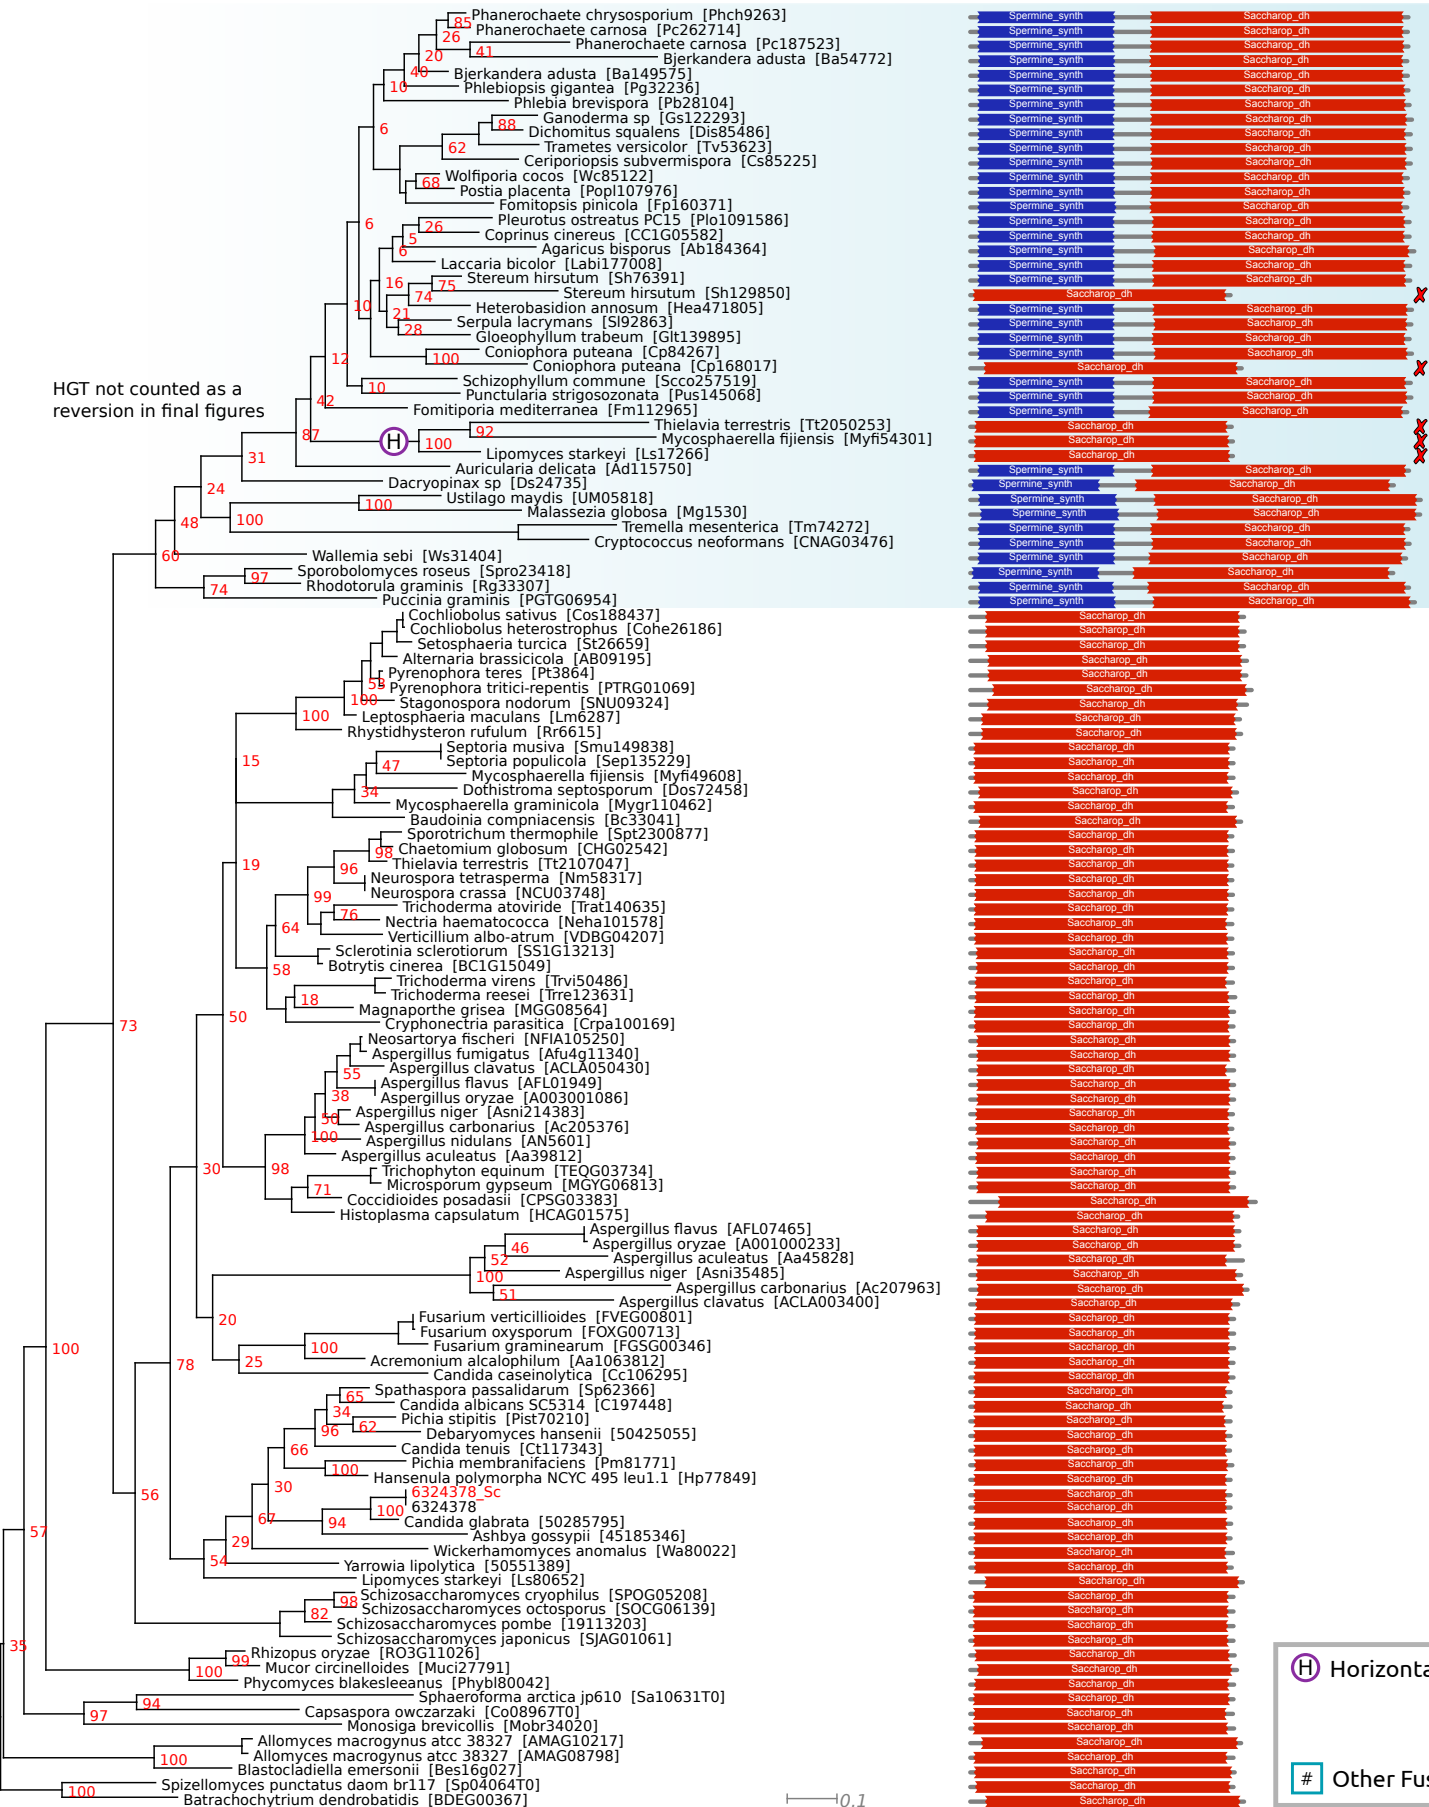

**(H) Horizontal Gene Transfer?**

Annotation

✓ Presence

# Other Fusion ✗ Absence

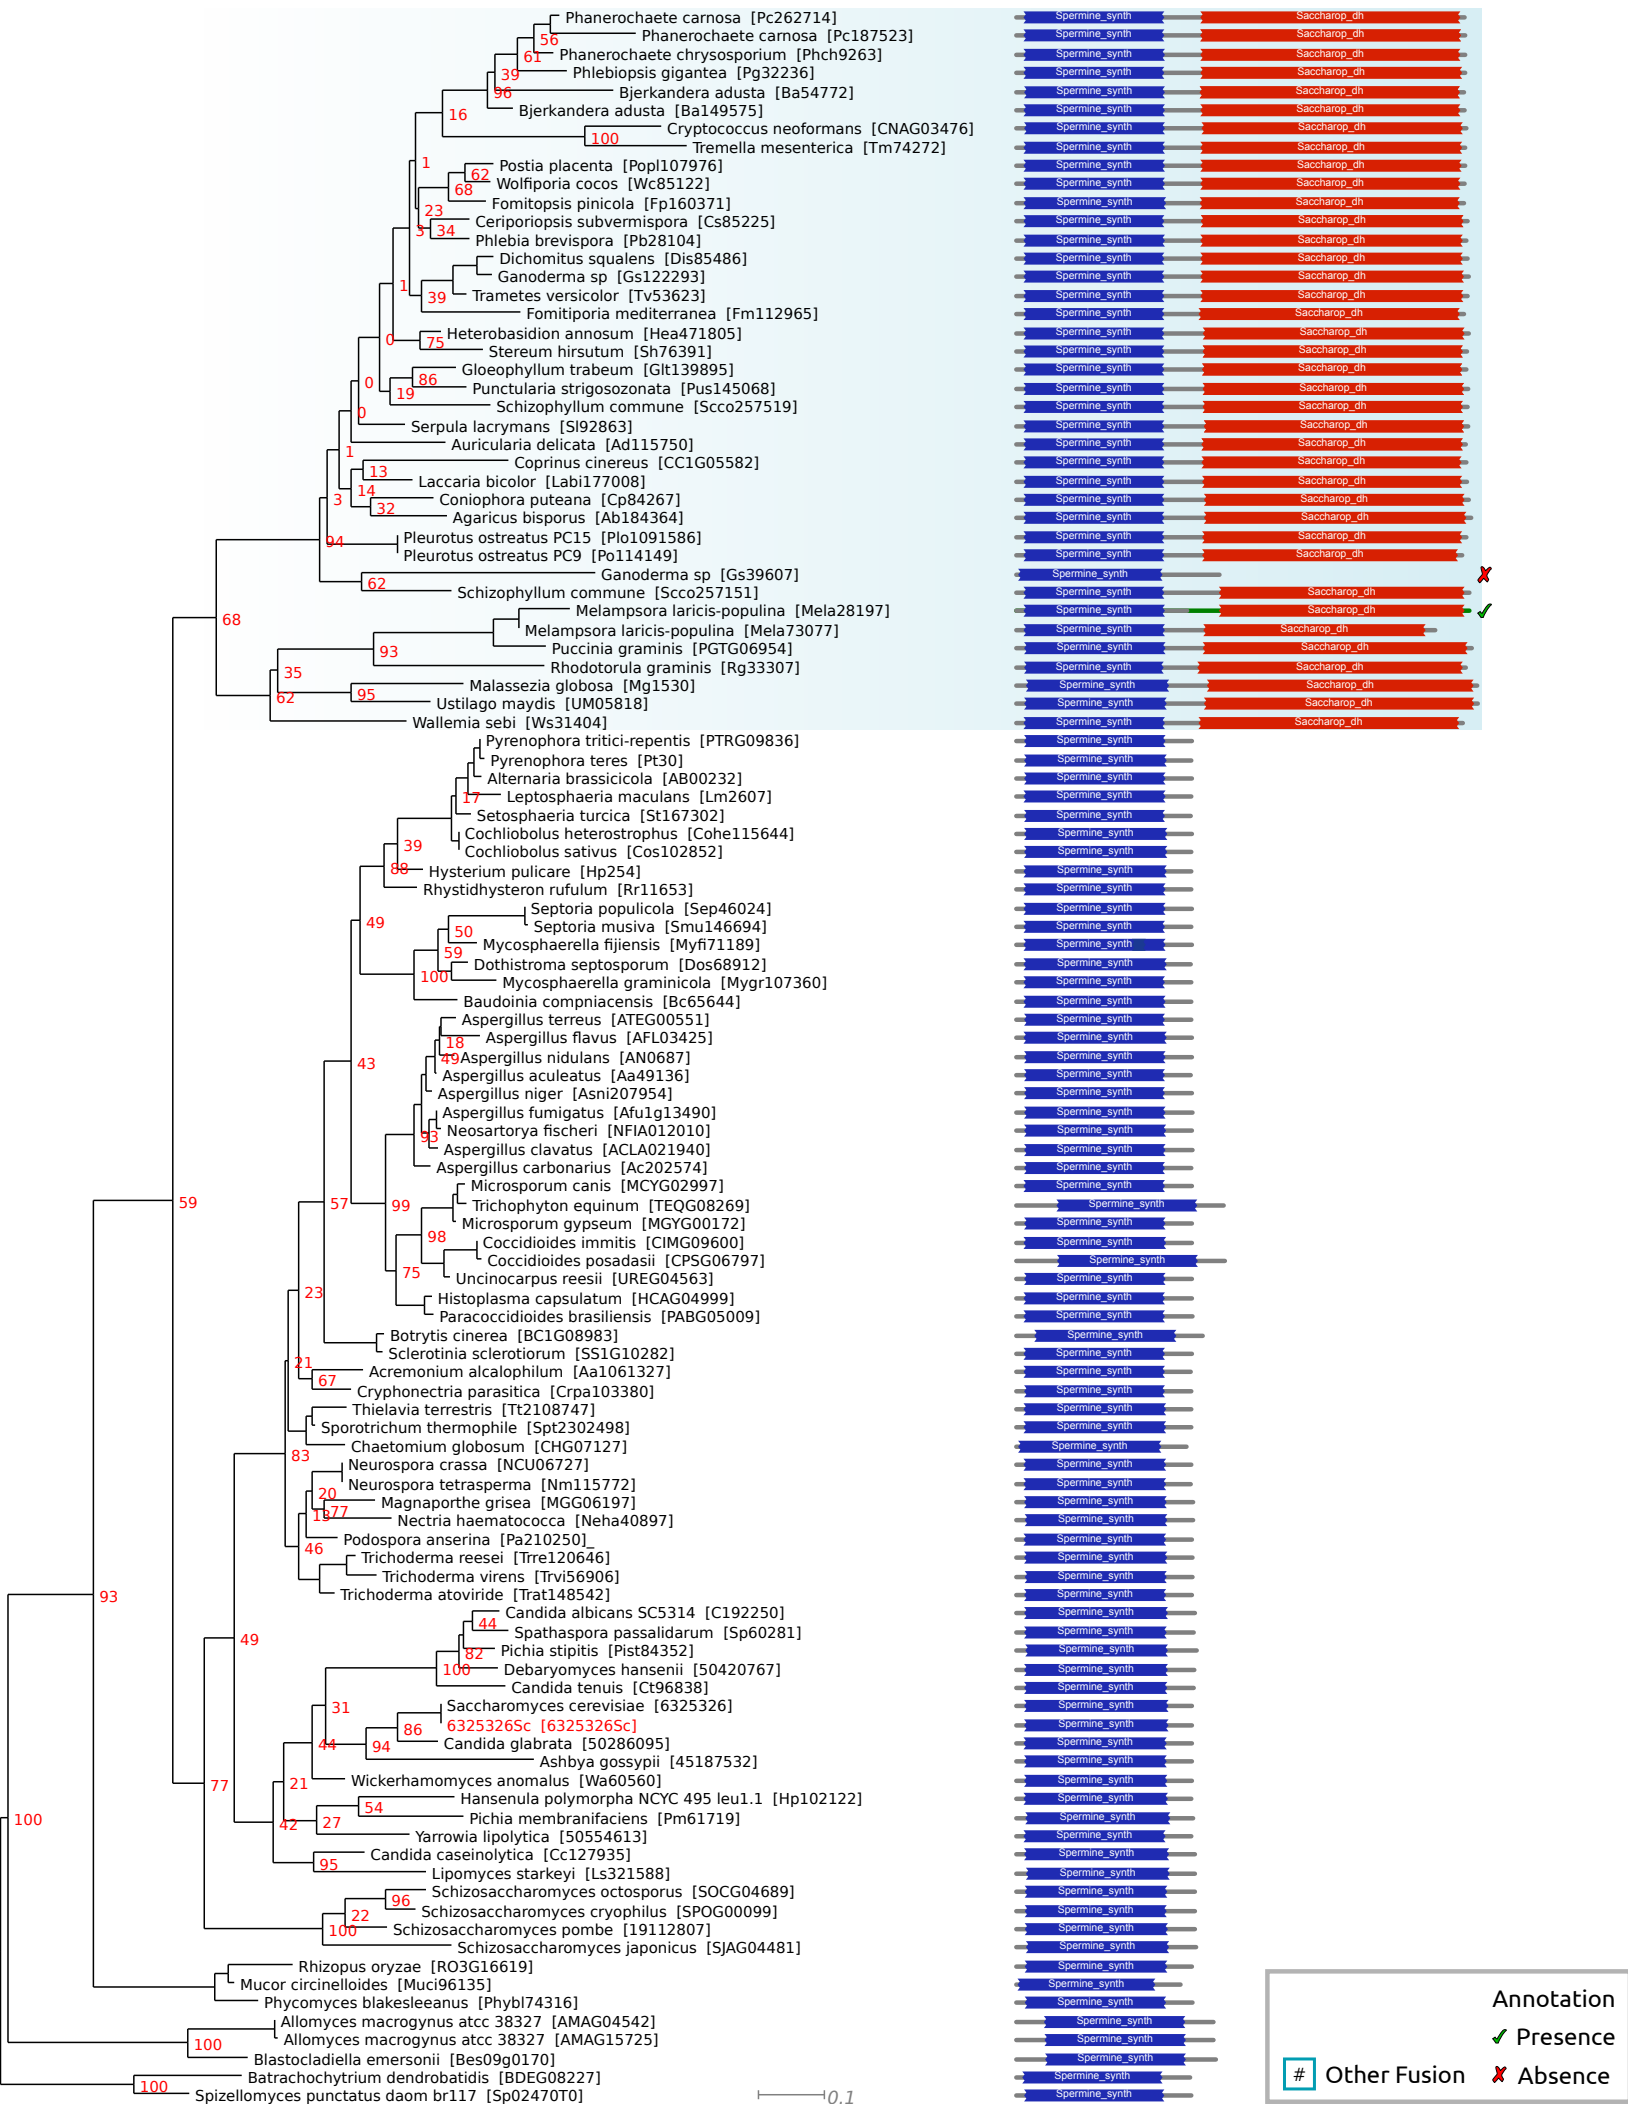





# Putative Fusion 14

September 26, 2012

## 1 Fasta Sequences

These are the unfused sequences identified by fdfBLAST belonging to the putative gene fusion in FASTA format. Accessions may be shortened, but belong to either the taxons individual genome project or NCBI's accession numbering.

```
>lcl|6321254Sc unnamed protein product
MPIKRLDTVVVNTGSQNDQHSASVPPVYLSTTFKVDLNNEDAQNYDYSRSGNPTRSVLQHQIGKLYRVPQENVLAVSSGM
TALDVILRGLVLLNGTDNHTPTIIAGDDLYGGTQRLLNFFKQQSHAVSVHVDTSDFEKFKTVFQSLDKVDCVLLESPTNP
LCKVVDIPRILRFVKCISPDTTVVVDNTMMSGLNCPQLNPGCDVVYESATKYLNHHDLMGGVVIISKTPFIASKLYFV
INSTGAGLSPMDSWLLVRGLKTLGVRLYQQQRNAMILAHWLENSCGFKPTRTNKATKTRFVGLRSNPDFKLHKSFNNGPG
AVLSFETGSFEHSKRLVSSKLSIWAVTVSFGCVNSLLSMPCKMSHASIDPELRKERDFPEDLVRLLCCGIENIVDLKKDL
LAAMVDADIIEVRENGKYLFNKLKNLAVNTTIDDLHKPLSIYEYFNQDLIRKDSSELNKSSKL
>lcl|6323864Sc unnamed protein product
MSLPFLTSAPGKVIIFGEHSAVYNKPAVAASVSALRTYLLISESSAPDTIELDFPDISFNHKWSINDFNAITEDQVNSQK
LAKAQQATDGLSQELVSLDPLLAQLSESFHYHAAFCFLYMFVCLCPHAKNIKFSKSTLPAGAGLGSSASISVSLALAM
AYLGGLIGSNDLEKLESENKHIWNQWAFIAGEKCIHGTPSGIDNAVATYGNALLFEKDSHNGTINTNNFKFLDDFPAIPMI
LTYTRIPRSTKDLVARVRVLVTEKFPEVMKPIILDAMGECALQGLEIMTKLSKCKGTDDEAVETNNELYEQLELIRINHG
LLVSIGVSHPGLELIKNSDDLRIKSTKLTGAGGGGCSLTLRRDITQEQIDSFKKKLQDDFSYETFETDLGGTGCCLLS
AKNLNKDLKIKSLVLFQFENKTTTKQIDDLPLPGNTNLPWTS
```

## 2 Annotated Phylograms

All trees were generated from an initial run of Darren's Orchard pipeline against 139 taxa (Table S1), using the above corresponding un-fused sequences as BLAST seeds. The alignments were then checked for any missing taxa, manually masked and then ProtTest3 was run, please see the Methods section for detail. The final trees were generated by the following command:

```
phyml -i alignment_file -d aa -b 100 -m model -c 8 -v invariant_sites -s BEST --quiet
-a gamma
```

Styling and annotation was made possible by Dendroscope and Inkscape.

## 3 Mesquite Cladogram

This tree is the 68-gene concatenated phylogeny (Fig. 1), with the presence of a fusion (black), presence of a fission (white), and absent/undetermined (grey) status of gene fusion characters plotted on to it using a "1/0/-" nexus-style data matrix. We used the program 'Mesquite' to calculate proportional likelihoods based on either an "Mk1" or "Assym. 2 param model." (see Table S4) of character change across the fungal phylogeny (Fig. 1). This allowed for a proportional likelihood of the position of the fusion/fission to be calculated.



Annotation

✓ Presence

✗ Absence

# Other Fusion

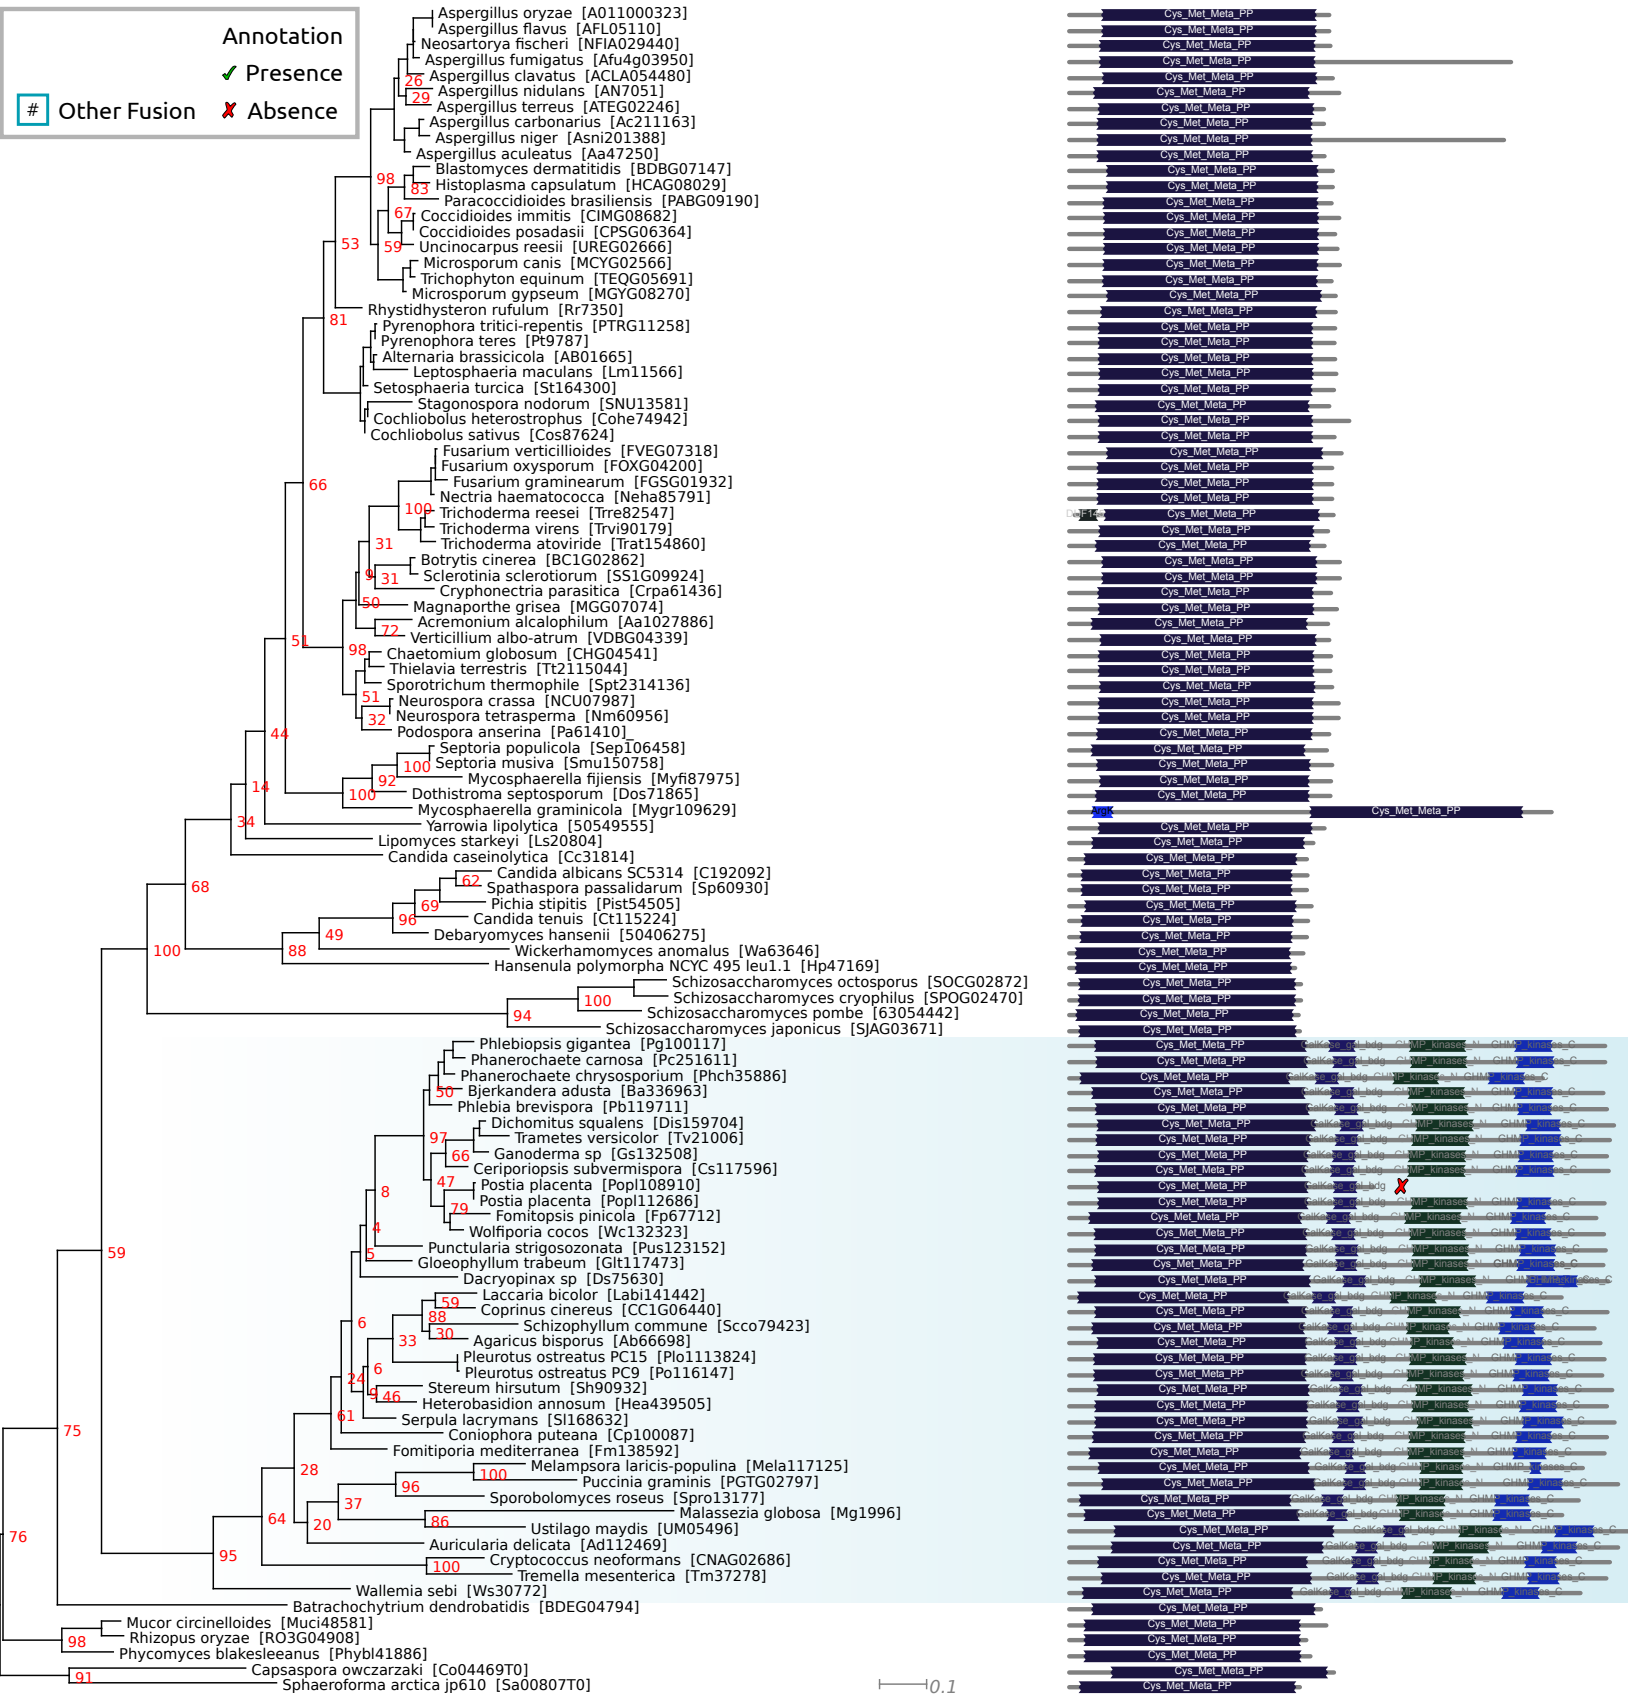

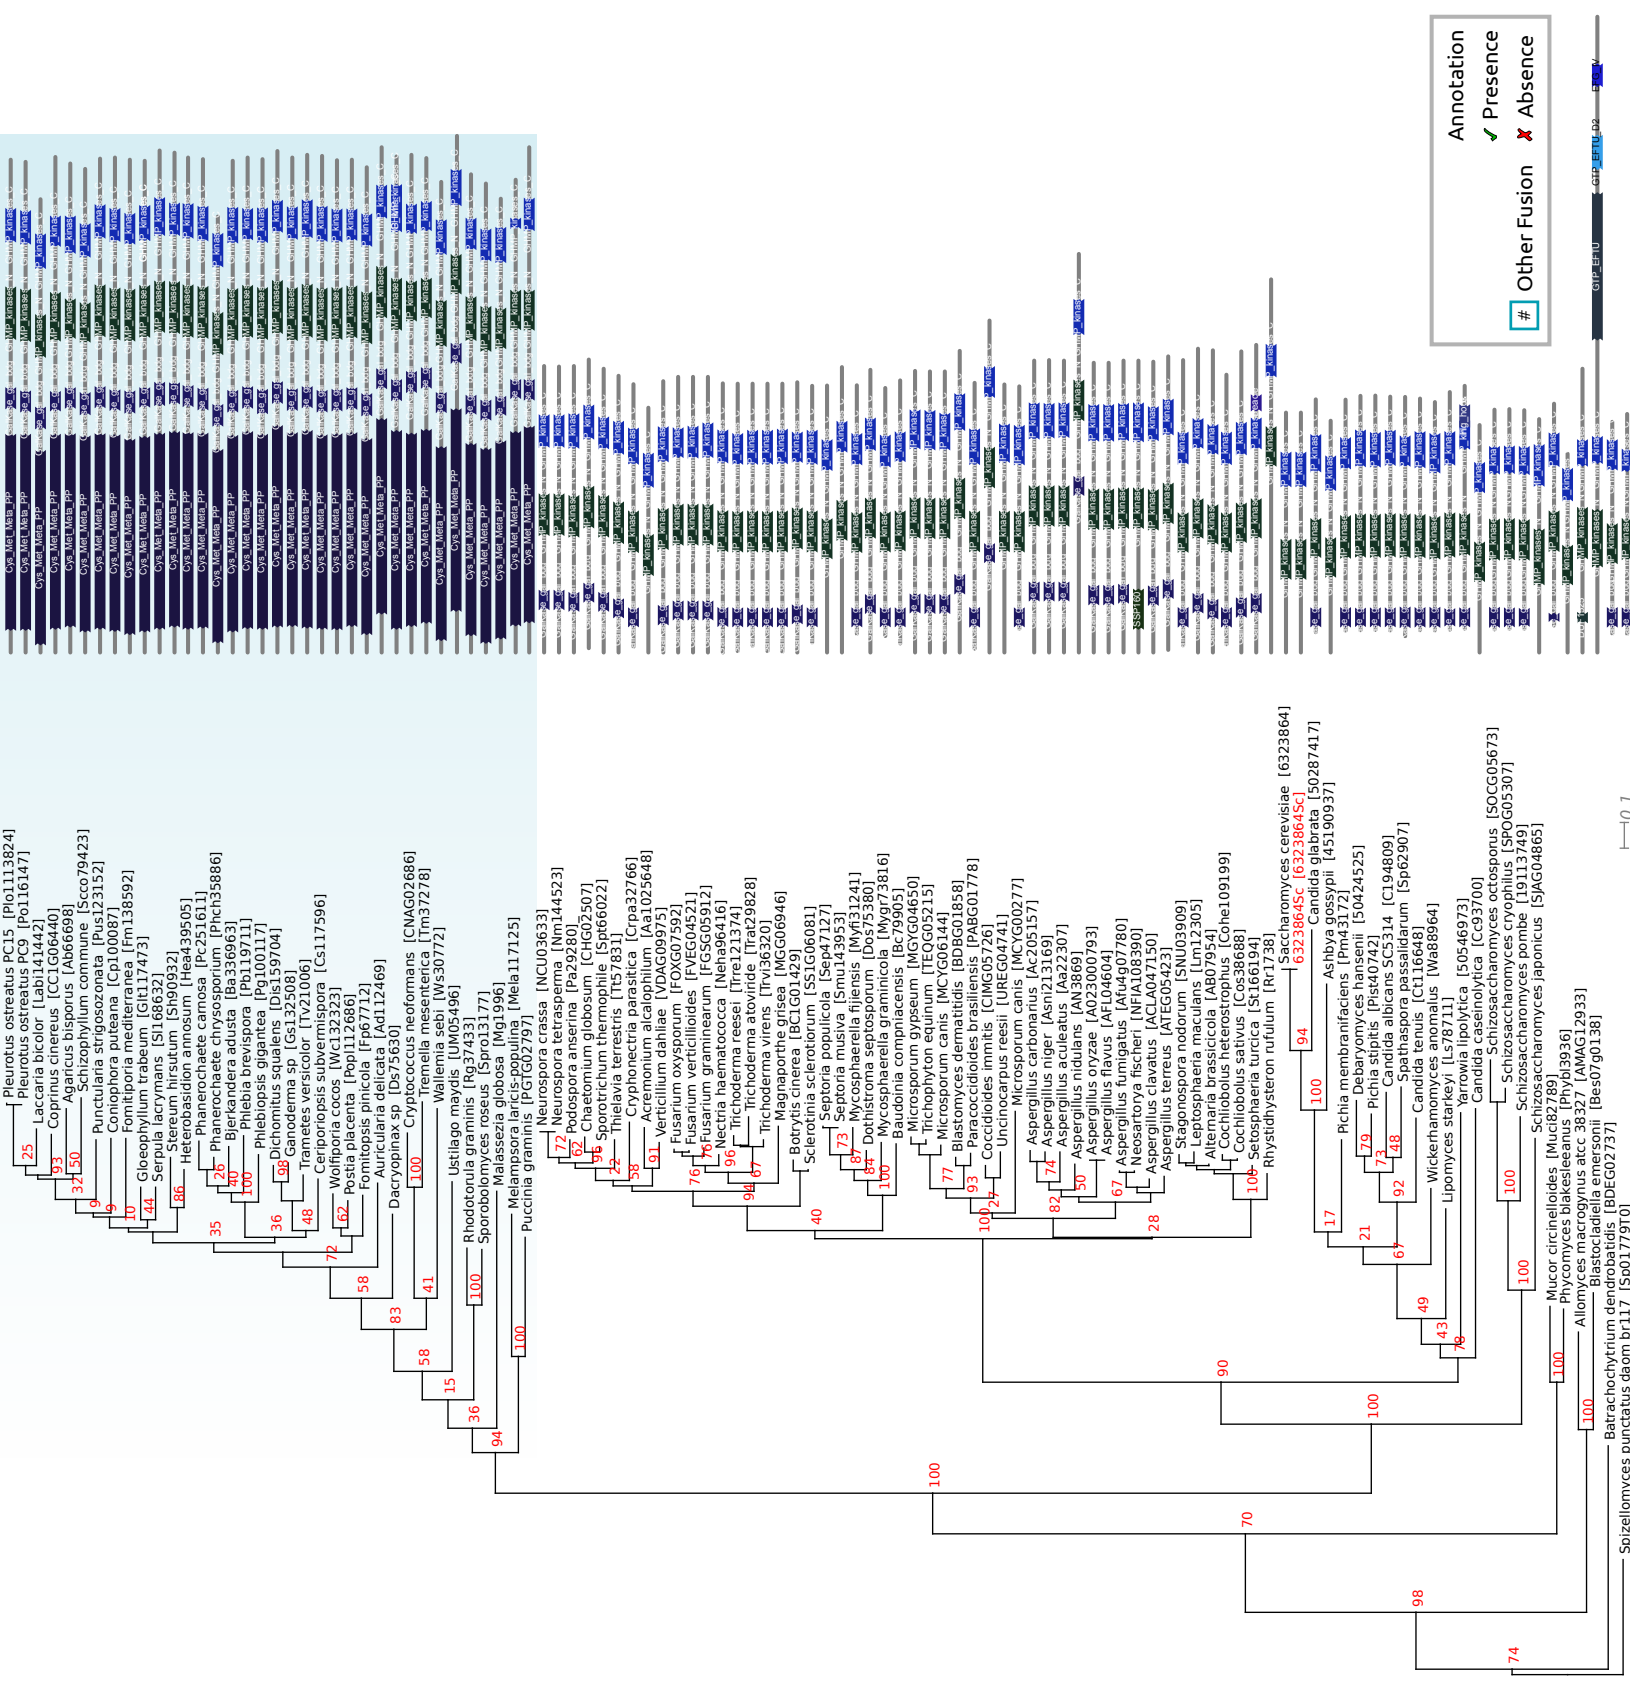

**Annotation**

- ✓ Presence
- ✗ Absence
- # Other Fusion

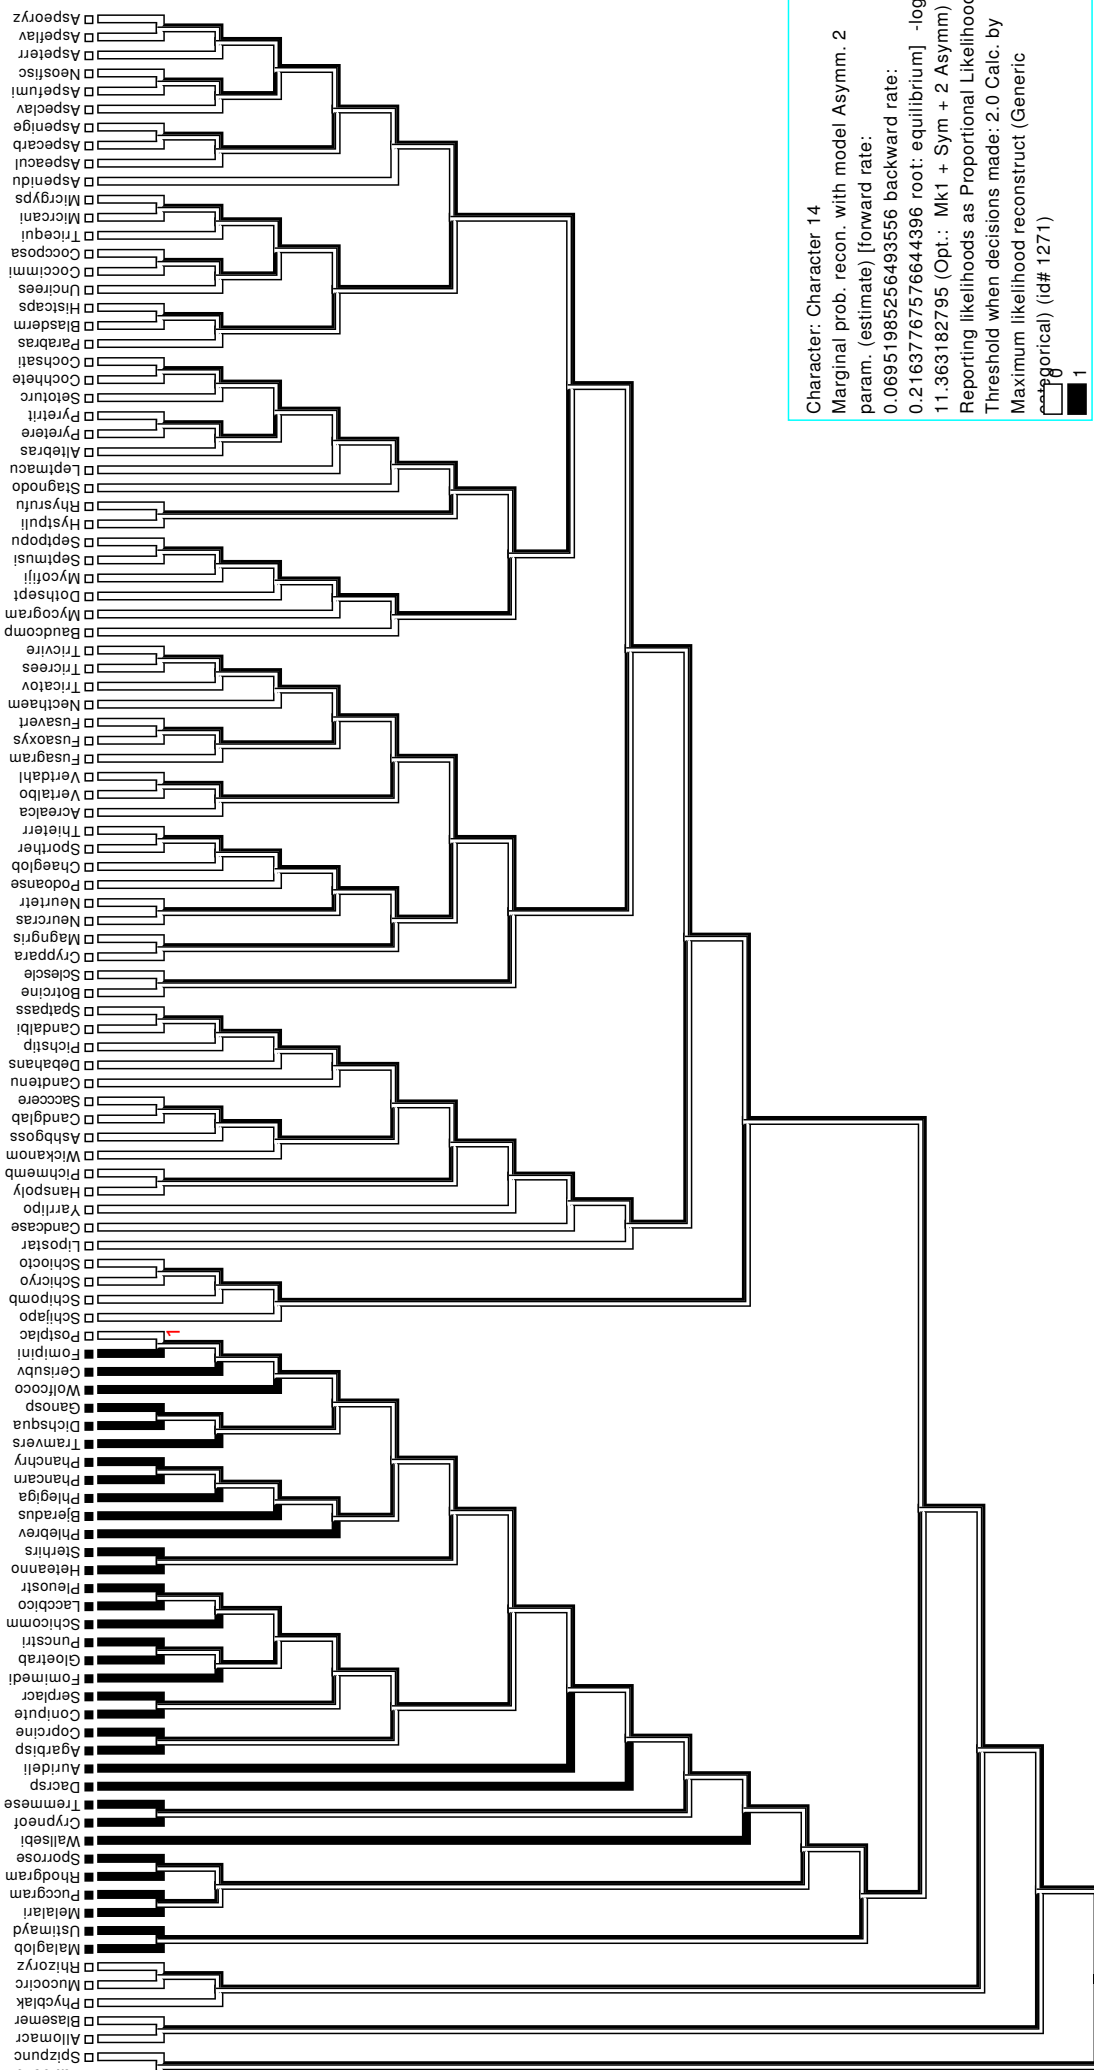

Character: Character 14  
 Marginal prob. recon. with model Asymm. 2  
 param. (estimate) [forward rate:  
 0.06951985256493566 backward rate:  
 0.21637767576644396 root: equilibrium] -log L:  
 11.363182795 (Opt.: Mk1 + Sym + 2 Asymm)  
 Reporting likelihoods as Proportional Likelihoods;  
 Threshold when decisions made: 2.0 Calc. by  
 Maximum likelihood reconstruct (Generic  
 morphological) (id# 1271)

Modified from Tree1++

# Putative Fusion 15

September 26, 2012

## 1 Fasta Sequences

These are the unfused sequences identified by fdfBLAST belonging to the putative gene fusion in FASTA format. Accessions may be shortened, but belong to either the taxons individual genome project or NCBI's accession numbering.

```
>lcl|Mc113296 unnamed protein product
MSNHSSSQHNDDATDDGTIPLTQHRLALELKSHPVRGRGVFTKEPLDRNVLVEISPILLFNAEEYDITYGKHTVLDQYTY
CWQGGFALALGLGSMFNHNSTPNVGFIRDIPNKLIRYVTLRRIEKDEELCISYGNHLWFEDESNTAAA AVSDSEDEPFPP
QDSSEDEQAYL
>lcl|Mc106337 unnamed protein product
MLYSLLMENKQENSGTRSKQAKSQQEASIPREEWPFEEVLSDEYERHLETIDVYTAHVEPKQTNSILKFAQKKLPSLEGL
EHCKKIRRIAKPETESGFELEVILCKADALDQDKLVDMLKEHQFEDCRISTVPVSKHAPLNRQQFDARHVPMSYREDT
RLDPKFTQQDIDIHSHMQAILANQQHSVVCRVVDPSTNEIMA EKSDTRA EHPLHHAVMNSIDHVAQNESKLYGGCGRMK
RTASQMTAVDDDAEAAA KKAAYLCTGYDIYITHEPCAMCAMLVHSRVS RVFYSIPSKTGS LGTNYKIH AHASLNHHYRV
FRHVLKDTAATFTLDSSLQDQEL
```

## 2 Annotated Phylograms

All trees were generated from an initial run of Darren's Orchard pipeline against 139 taxa (Table S1), using the above corresponding un-fused sequences as BLAST seeds. The alignments were then checked for any missing taxa, manually masked and then ProtTest3 was run, please see the Methods section for detail. The final trees were generated by the following command:

```
phym1 -i alignment_file -d aa -b 100 -m model -c 8 -v invariant_sites -s BEST --quiet
-a gamma
```

Styling and annotation was made possible by Dendroscope and Inkscape.

## 3 Mesquite Cladogram

This tree is the 68-gene concatenated phylogeny (Fig. 1), with the presence of a fusion (black), presence of a fission (white), and absent/undetermined (grey) status of gene fusion characters plotted on to it using a "1/0/-" nexus-style data matrix. We used the program 'Mesquite' to calculate proportional likelihoods based on either an "Mk1" or "Assym. 2 param model." (see Table S4) of character change across the fungal phylogeny (Fig. 1). This allowed for a proportional likelihood of the position of the fusion/fission to be calculated.

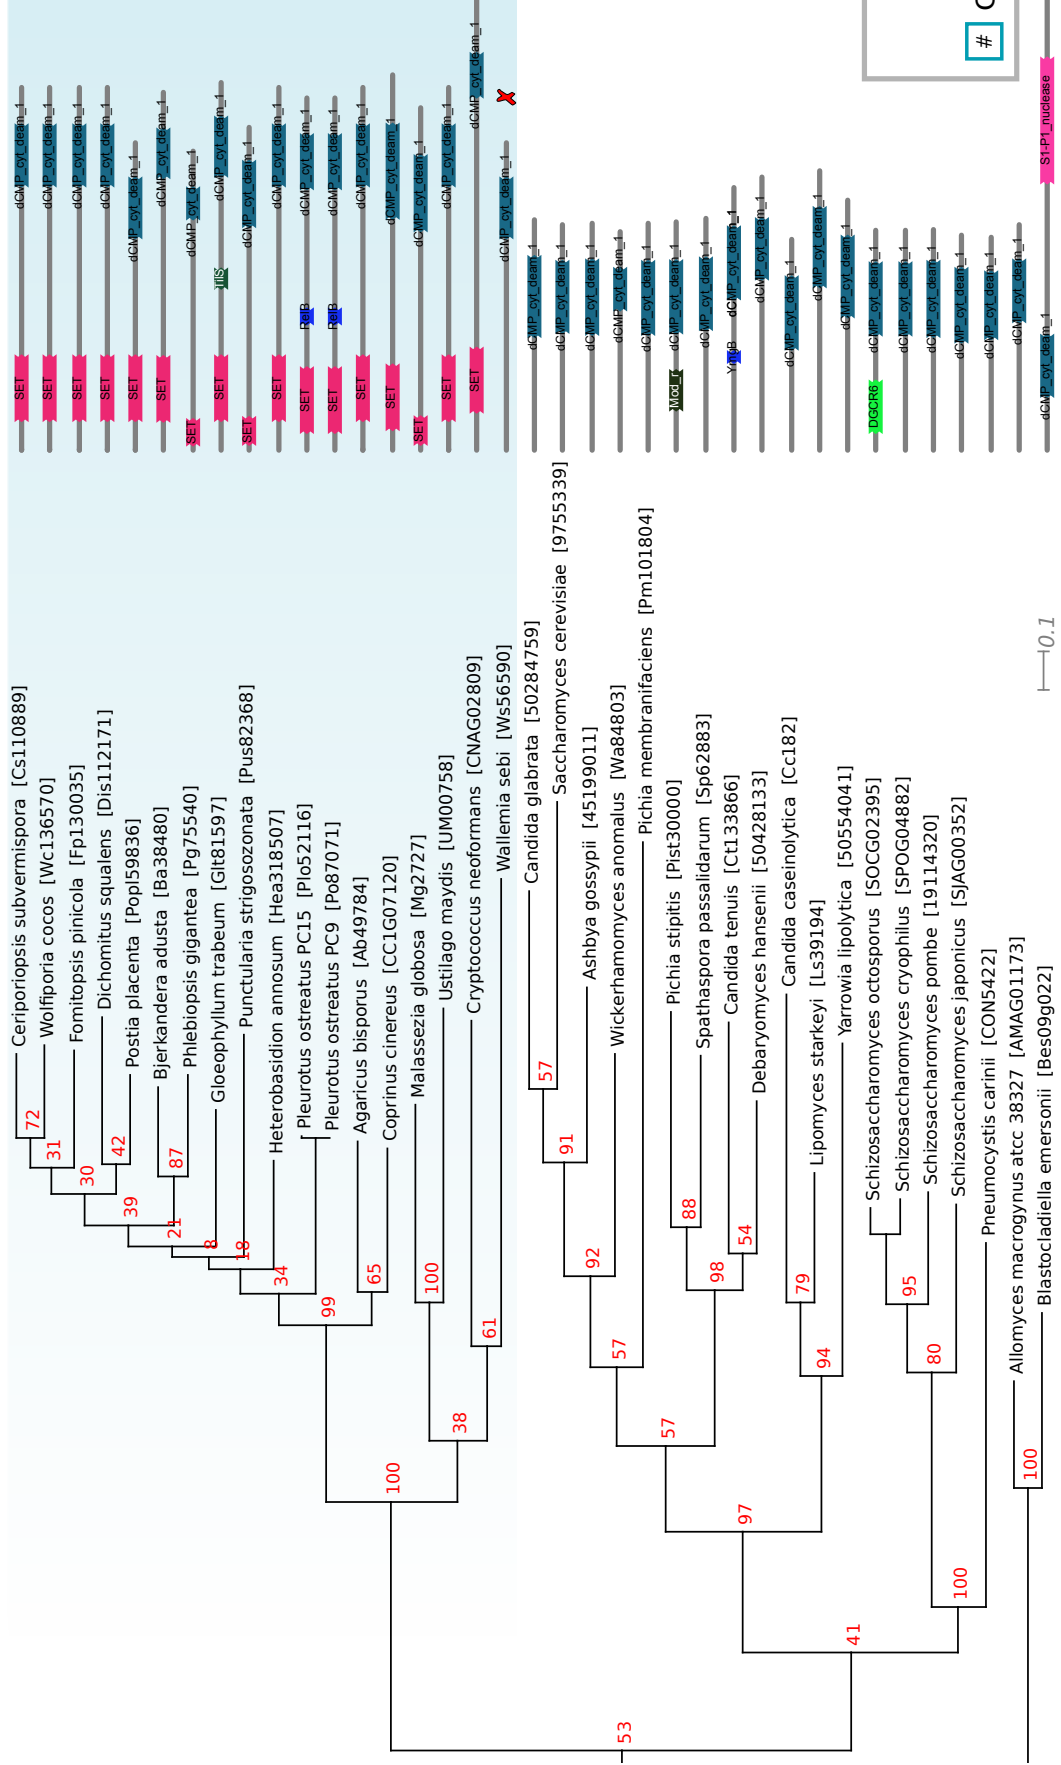

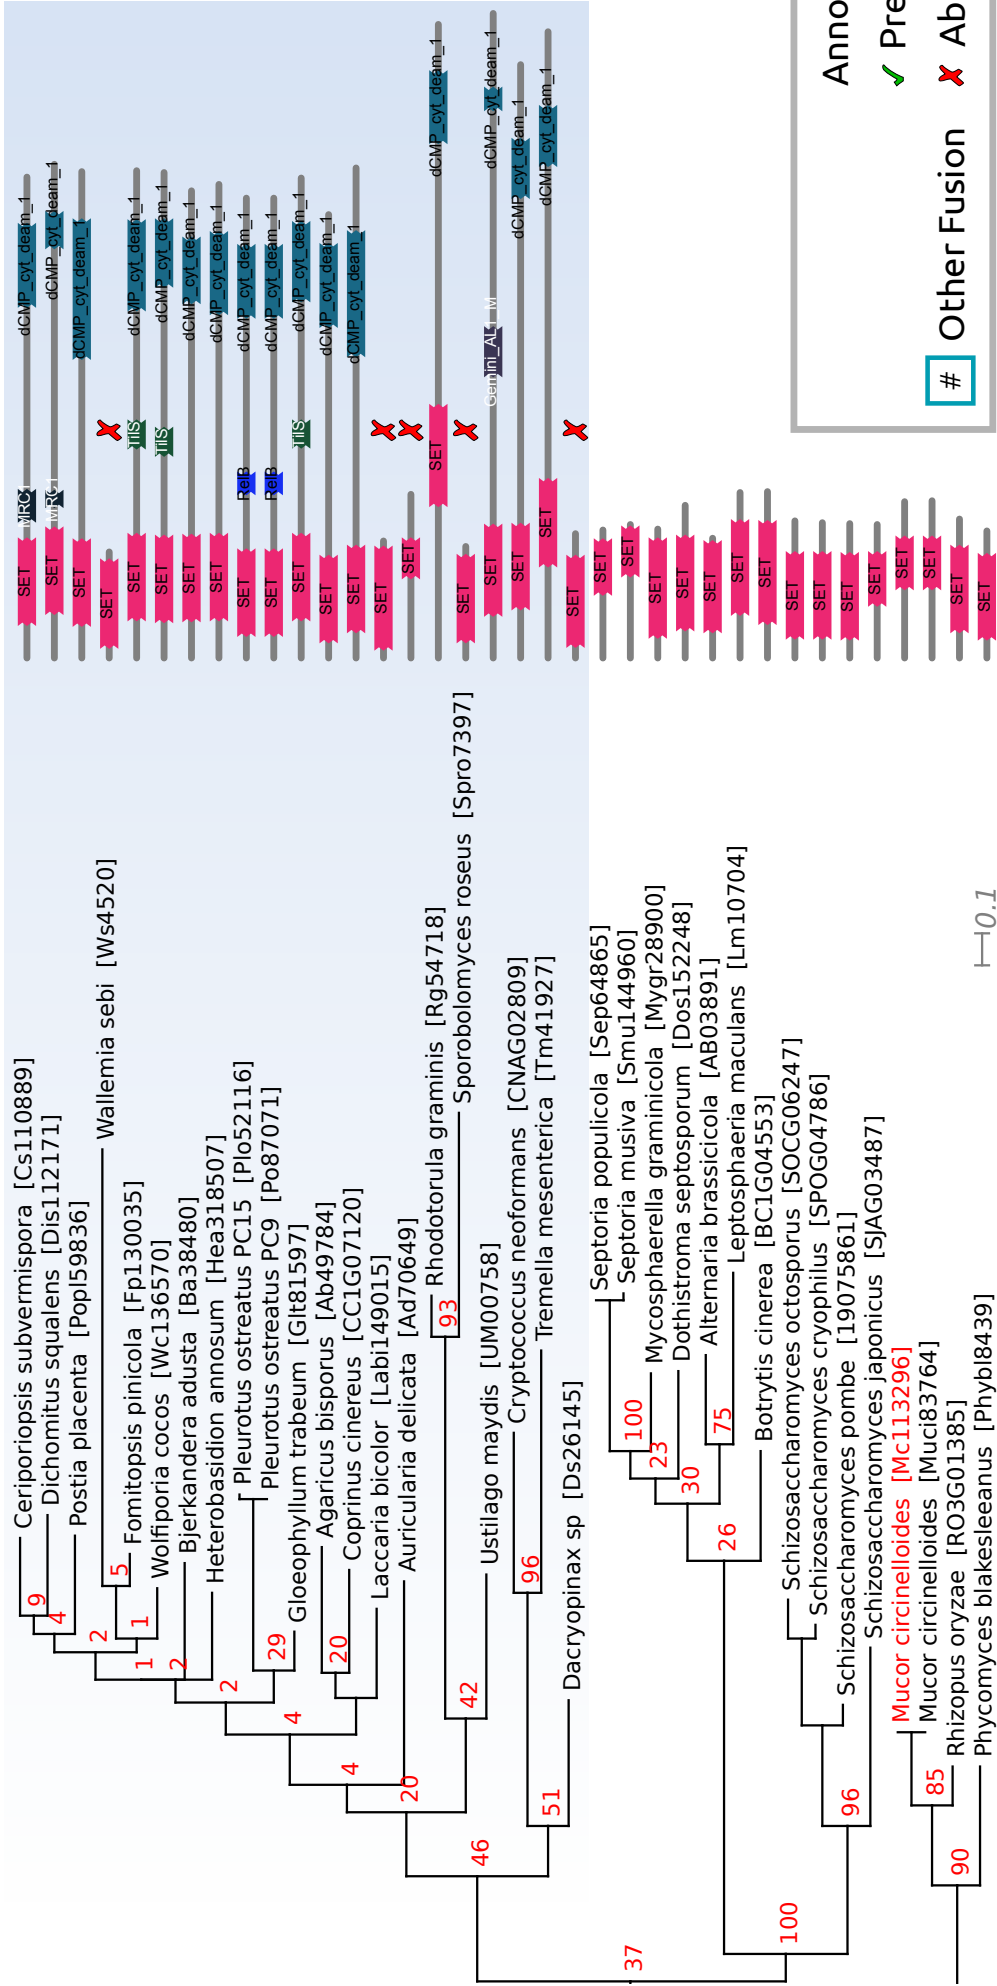

**Annotation**

- ✓ Presence
- ✗ Absence
- # Other Fusion

—0.1

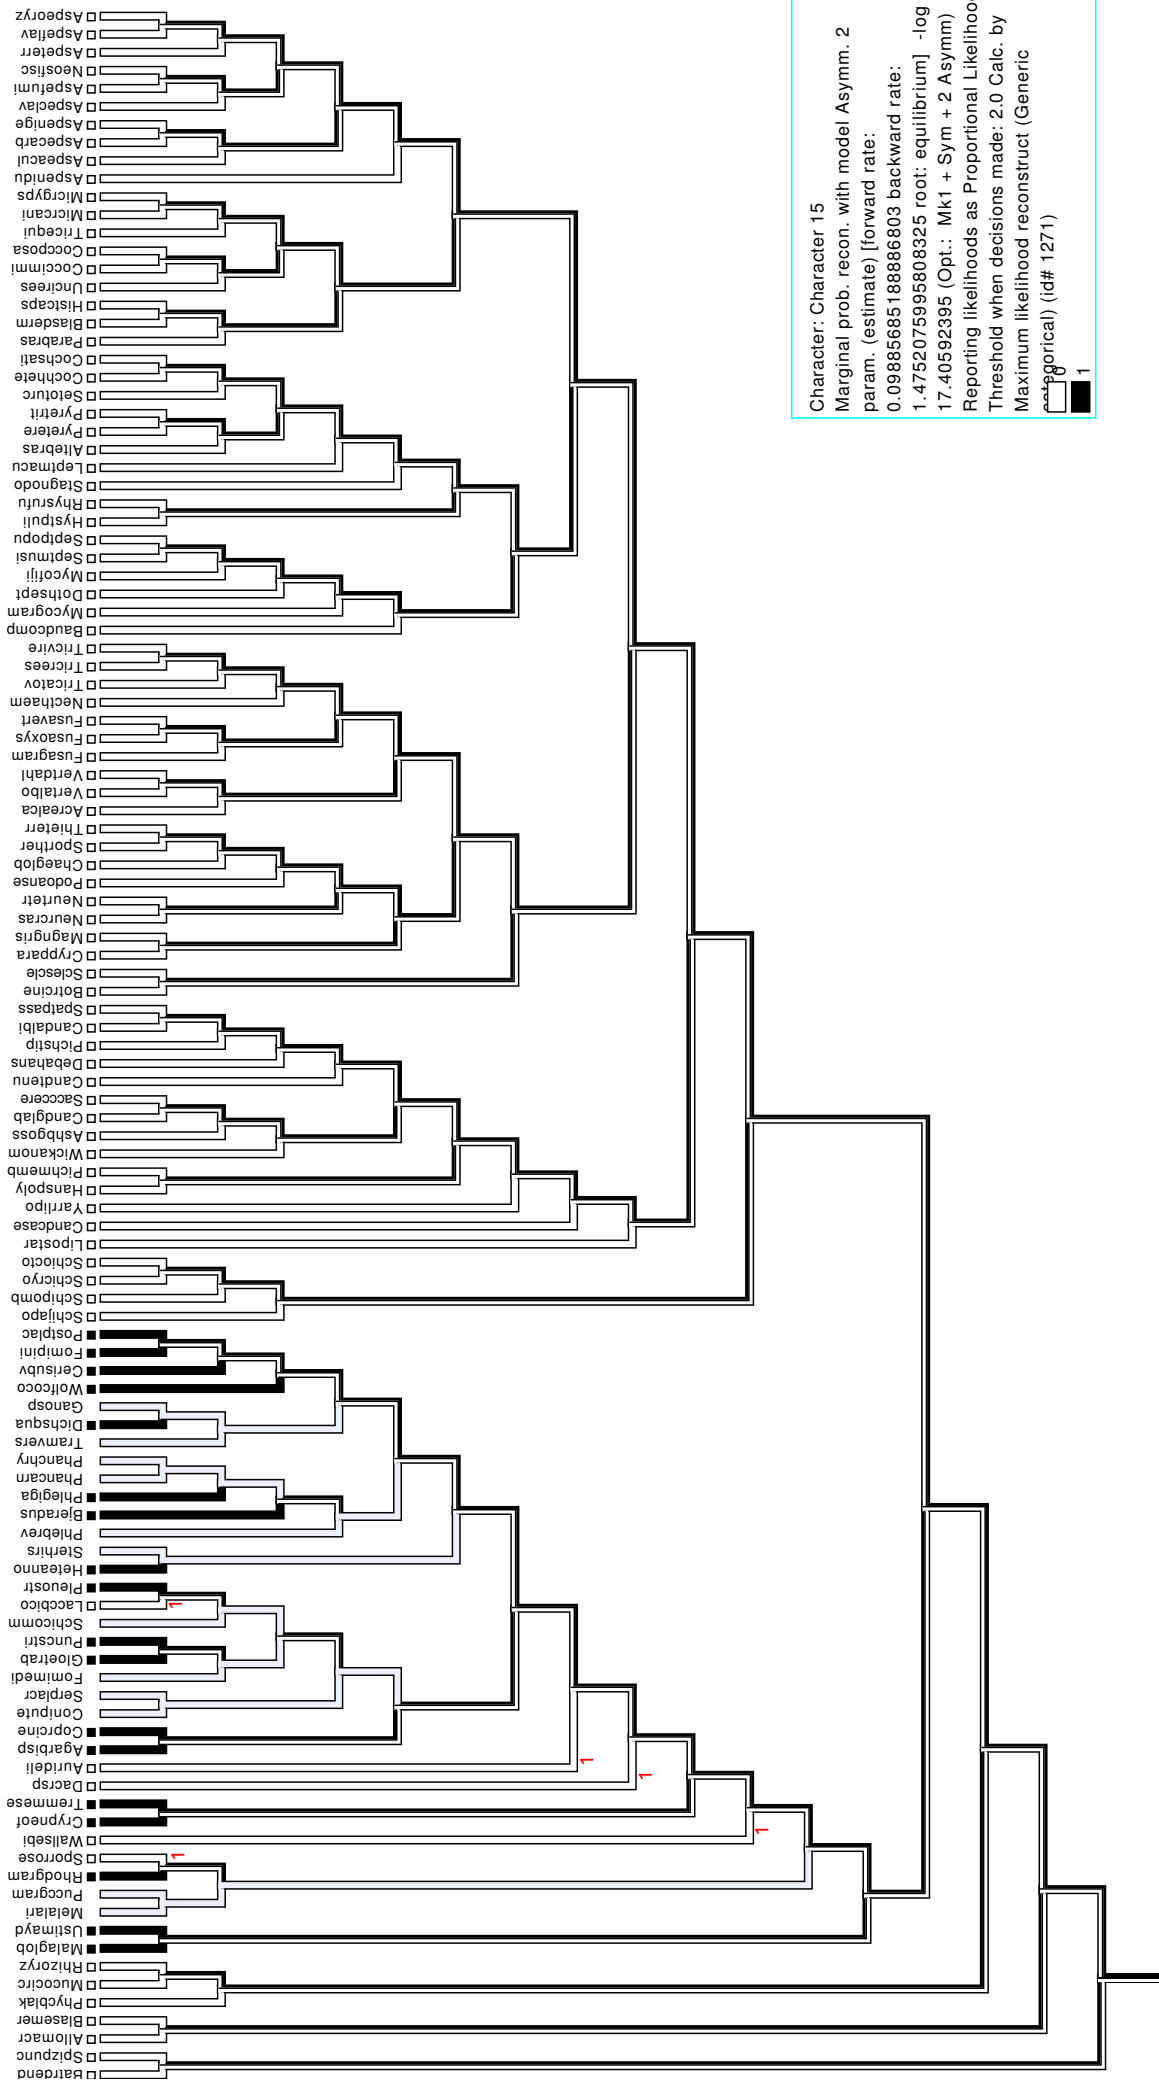

- Rattand
- Spizunc
- Allomacr
- Blasemer
- Phybllak
- Mucocitc
- Rhizoyz
- Malaglob
- Ustimayd
- Melatari
- Puccgram
- Rhodgram
- Sporrose
- Wallsebl
- Cypneot
- Tremmese
- Dacrsp
- Auridel
- Agarbisrp
- Coprine
- Conipute
- Serplacr
- Fomimed
- Gloetrab
- Puncstri
- Schicomm
- Laccbico
- Pleuost
- Heteanno
- Sterhirs
- Phlebrev
- Bjeradus
- Phlegiga
- Phancarn
- Phanchry
- Tamvers
- Dichsqua
- Ganosp
- Wolfcoco
- Certsubv
- Fompmi
- Postplac
- Schipomb
- Schicyo
- Schiocto
- Lipostar
- Candcasse
- Yarrilpo
- Hanspoly
- Pichmemb
- Wikanom
- Ashbgoss
- Candglab
- Saccere
- Candtemu
- Debahans
- Pichstip
- Candalbi
- Spatpass
- Botcine
- Sclescle
- Cyppara
- Magngfris
- Neurcras
- Neutrtr
- Podanse
- Chaeglob
- Sporthr
- Thieterr
- Acrealca
- Vertalbo
- Veridahl
- Fusagram
- Fusoxoys
- Fusavert
- Nechtahem
- Tricatov
- Tricrees
- Tricvire
- Baudcomp
- Mycogram
- Dothsept
- Mycotiji
- Sepimusl
- Sepipopu
- Hysrulu
- Rhystrlu
- Stagnodo
- Lepimacu
- Aliebras
- Pyeter
- Pyreit
- Setiure
- Cochte
- Cochsati
- Parabras
- Blasderm
- Histcaps
- Unctrees
- Cococm
- Cocoposa
- Tricqui
- Micrcani
- Micrgyps
- Aspndu
- Aspcaul
- Aspcarb
- Aspenge
- Aspclav
- Aspnumi
- Neostisc
- Aspeterr
- Aspetlav
- Aspeoryz



# Putative Fusion 16

September 26, 2012

## 1 Fasta Sequences

These are the unfused sequences identified by fdfBLAST belonging to the putative gene fusion in FASTA format. Accessions may be shortened, but belong to either the taxons individual genome project or NCBI's accession numbering.

```
>lcl|Mc139598 unnamed protein product
MEHEDEEDCTVQDSTEIIQLEHHIVYSTSYQVPVIYFKATFSDGTPLSHNEIFQYIIPDITYQDAVVSQNDHPILGIPCWY
IHPCDTRSLMNTMTFDPVDYIKVWLSAYGPIVKCSIPTSMFTRS
>lcl|Mc72864 unnamed protein product
MLASSRQFIPSLRTDVVIIASAVRTPVGCFFNGSLKSLRAIELGGIAAKSAIEKAGIKPEDVEEAYFGNVLQANLGQSPARQ
AILNAGCPETTEATTINKVCASGMKAVMLAAQTIKAGDRNVMVAGGMESMSNAPYYAPRGAAYGHQQLSDAIIKDGLWDA
YNNIHMGS CAENTAANYNITREDQDNHAI ESYKRAAKAWENGAFDAE IAPVTIKSKKGETVIKVD E EYKNVKFDKITSLR
AVFKKDGTVTAANASTLNDGASALV LMSRAKAEELGVKPLARIVSYADAATAPIDFTIAPAKALPVALEKAGLTVDISK
FELNEAFSVVARVNEQLMKLDPSKVN VNNGGAVALGHP I GSSGSRIIVTLTHLLKSGEFGAAAVCNGGGAASSIVIQRE
```

## 2 Annotated Phylograms

All trees were generated from an initial run of Darren's Orchard pipeline against 139 taxa (Table S1), using the above corresponding un-fused sequences as BLAST seeds. The alignments were then checked for any missing taxa, manually masked and then ProtTest3 was run, please see the Methods section for detail. The final trees were generated by the following command:

```
phyml -i alignment_file -d aa -b 100 -m model -c 8 -v invariant_sites -s BEST --quiet
-a gamma
```

Styling and annotation was made possible by Dendroscope and Inkscape.

### 2.1 Important Notes

First domain phylogeny showed low resolution, so this result was not included here.

## 3 Mesquite Cladogram

This tree is the 68-gene concatenated phylogeny (Fig. 1), with the presence of a fusion (black), presence of a fission (white), and absent/undetermined (grey) status of gene fusion characters plotted on to it using a "1/0/-" nexus-style data matrix. We used the program 'Mesquite' to calculate proportional likelihoods based on either an "Mk1" or "Assym. 2 param model." (see Table S4) of character change across the fungal phylogeny (Fig. 1). This allowed for a proportional likelihood of the position of the fusion/fission to be calculated.





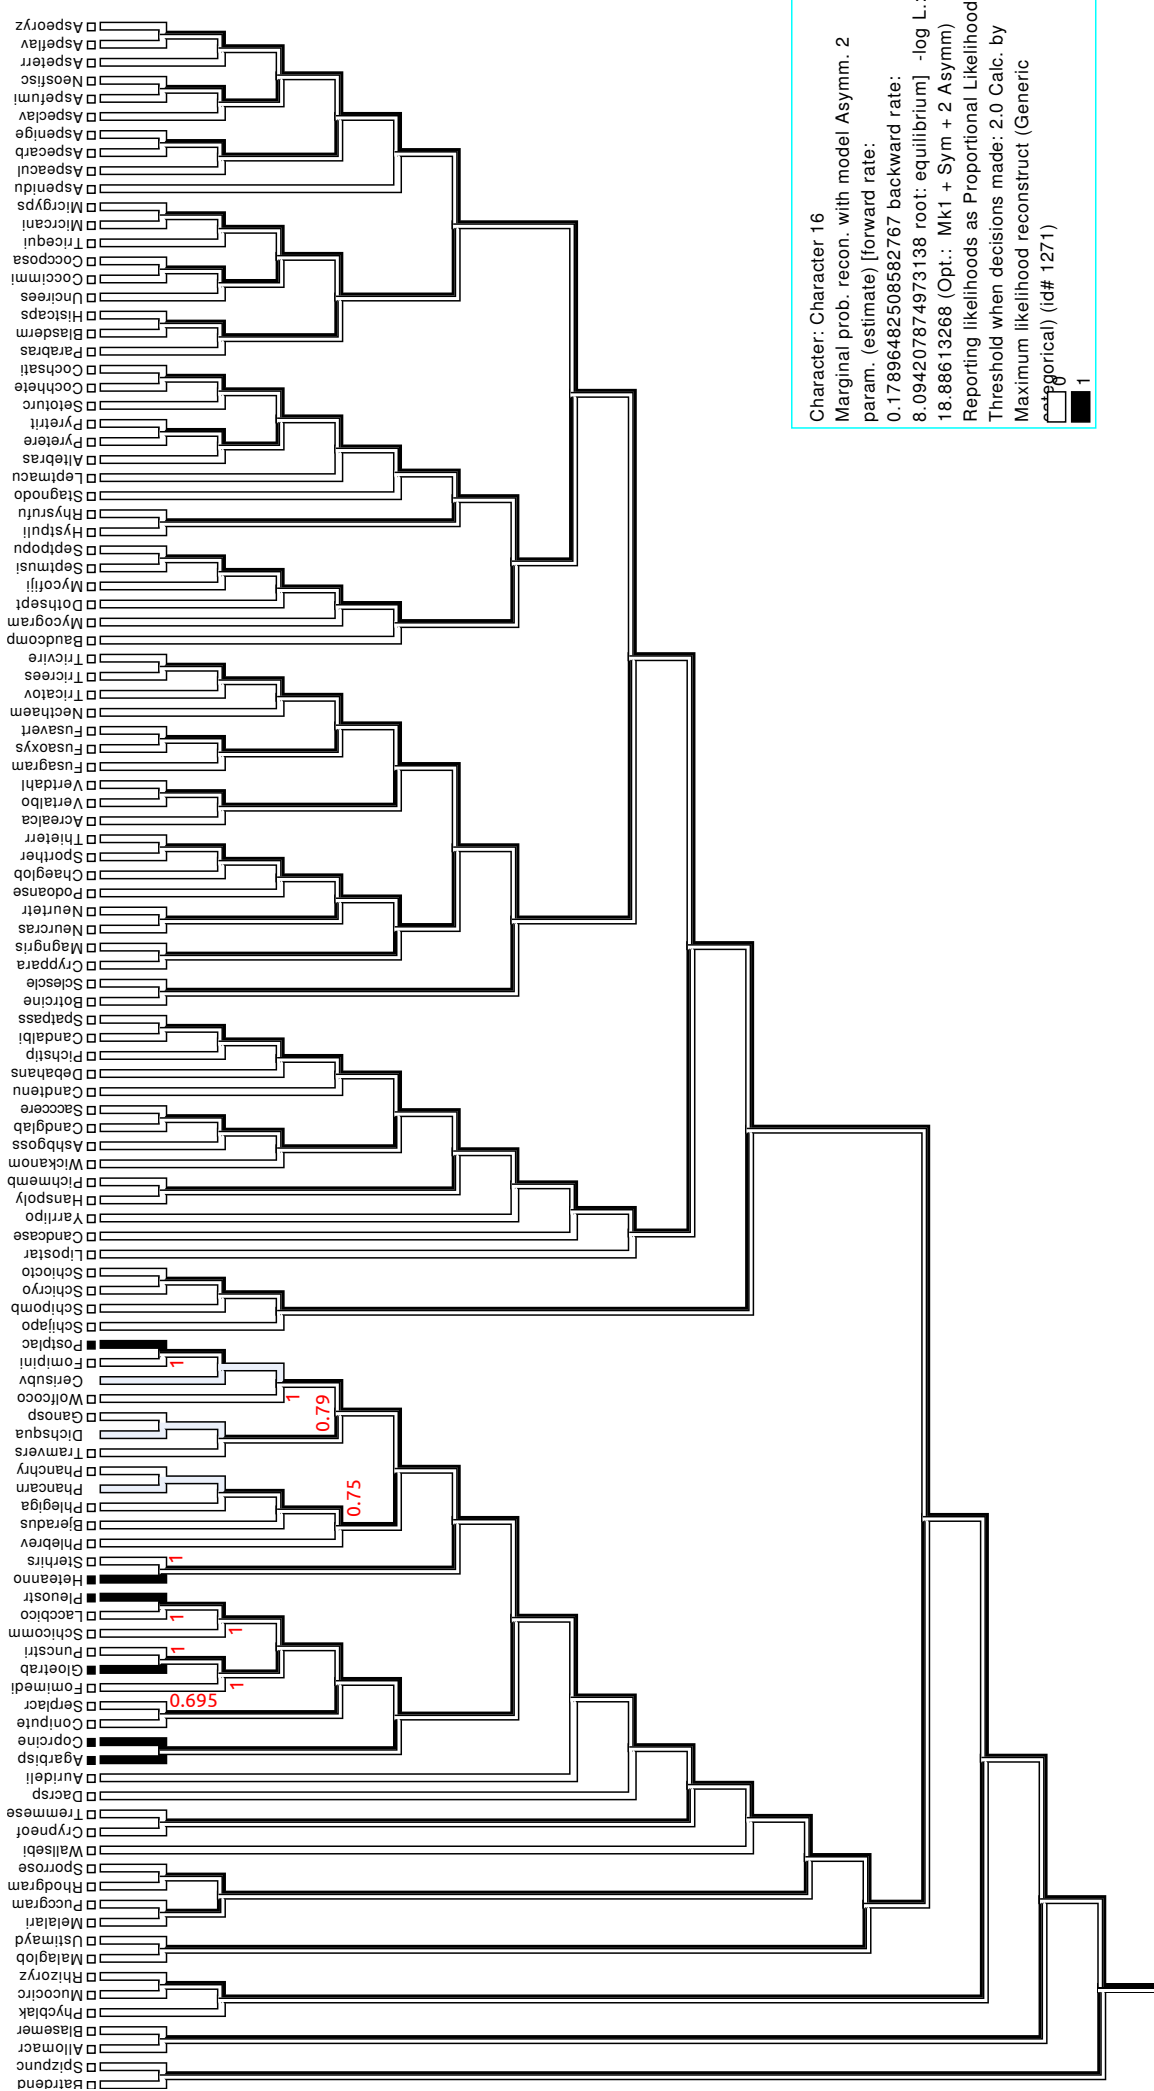

# Putative Fusion 17

September 26, 2012

## 1 Fasta Sequences

These are the unfused sequences identified by fdfBLAST belonging to the putative gene fusion in FASTA format. Accessions may be shortened, but belong to either the taxons individual genome project or NCBI's accession numbering.

```
>lcl|NCU02798T0 unnamed protein product
MADTFVSDFQVRSLAGEPCAASVSVRNLSSTLYAASDAWGRKCTVAPQPCLISAEVHFKQPFGTAAANDQLGADTVHYGNL
SKAILERMKRFTVPREQEQQEQEQKQSGSGNGNDHSVQETNNNNNNNNNNNNFTLAYVIHDLWVGLTGWAHFGSVKEEEK
PFLDISSIRFLSLTVTLPKASLLGDGVSMTCSQFFKNGPGEKMRNENLISASLKIHNKVPVLVGVNPHERRAKQFVVTSV
NVERYFRMDDYYSELEGVVVKALEESSYETLEALGAHLAEKILEPDHRKDHTKWQVHIRMEKPTAVPLADCPIVEVRAGY
GFPAPGRPAAS
>lcl|NCU09930T0 unnamed protein product
MTDAIDLPAASKPAAPTVRTAYIALGNSNLGDRIGWIEKACKEMDARGIKVKRTSCLWETEPMYVLDQDRFVNGACEVETT
LEPLELLDALQDIENSLGRKKIIDKGPRNIDLDILLYENLKVVDHERLKIPIHIGIPEREFVLRPLAELIPDKPLDHRPWT
LTRDLLDALPPSSTPITMTPLSSHGHPPIQALNPSRKTHVMAILNMTPDSFSDGGQHASAGLESTIQSFLDAGATMIDV
GGQSTAPRTPQVSAEEEEIGRVVPAIKMIREKFSHRDVLISVDTYRASVAEAAVAAGADIVNDVSGGSMDPDMLPTVARLG
STICLMHMRGTPANMSSLNEYPEAEGGLIGGIKELVGRVAAAEEAAGIRRWIRIVLDPGLGFAKVGPNVDVLRHLEELRS
WPLGLQGLPWLVGSSSRKSFQVTVTPKERIWGTAATVAAAVQGGADVVRVHDVKEMAQVVMADAIWRY
```

## 2 Annotated Phylograms

All trees were generated from an initial run of Darren's Orchard pipeline against 139 taxa (Table S1), using the above corresponding un-fused sequences as BLAST seeds. The alignments were then checked for any missing taxa, manually masked and then ProtTest3 was run, please see the Methods section for detail. The final trees were generated by the following command:

```
phyml -i alignment_file -d aa -b 100 -m model -c 8 -v invariant_sites -s BEST --quiet
-a gamma
```

Styling and annotation was made possible by Dendroscope and Inkscape.

### 2.1 Important Notes

FolB phylogeny showed low resolution, so this result was not included here.

## 3 Mesquite Cladogram

This tree is the 68-gene concatenated phylogeny (Fig. 1), with the presence of a fusion (black), presence of a fission (white), and absent/undetermined (grey) status of gene fusion characters plotted on to it using a "1/0/-" nexus-style data matrix. We used the program 'Mesquite' to calculate proportional likelihoods based on either an "Mk1" or "Assym. 2 param model." (see Table S4) of character change across the fungal phylogeny (Fig. 1). This allowed for a proportional likelihood of the position of the fusion/fission to be calculated.

**Annotation**

- ✓ Presence
- ✗ Absence
- Other Fusion
- #

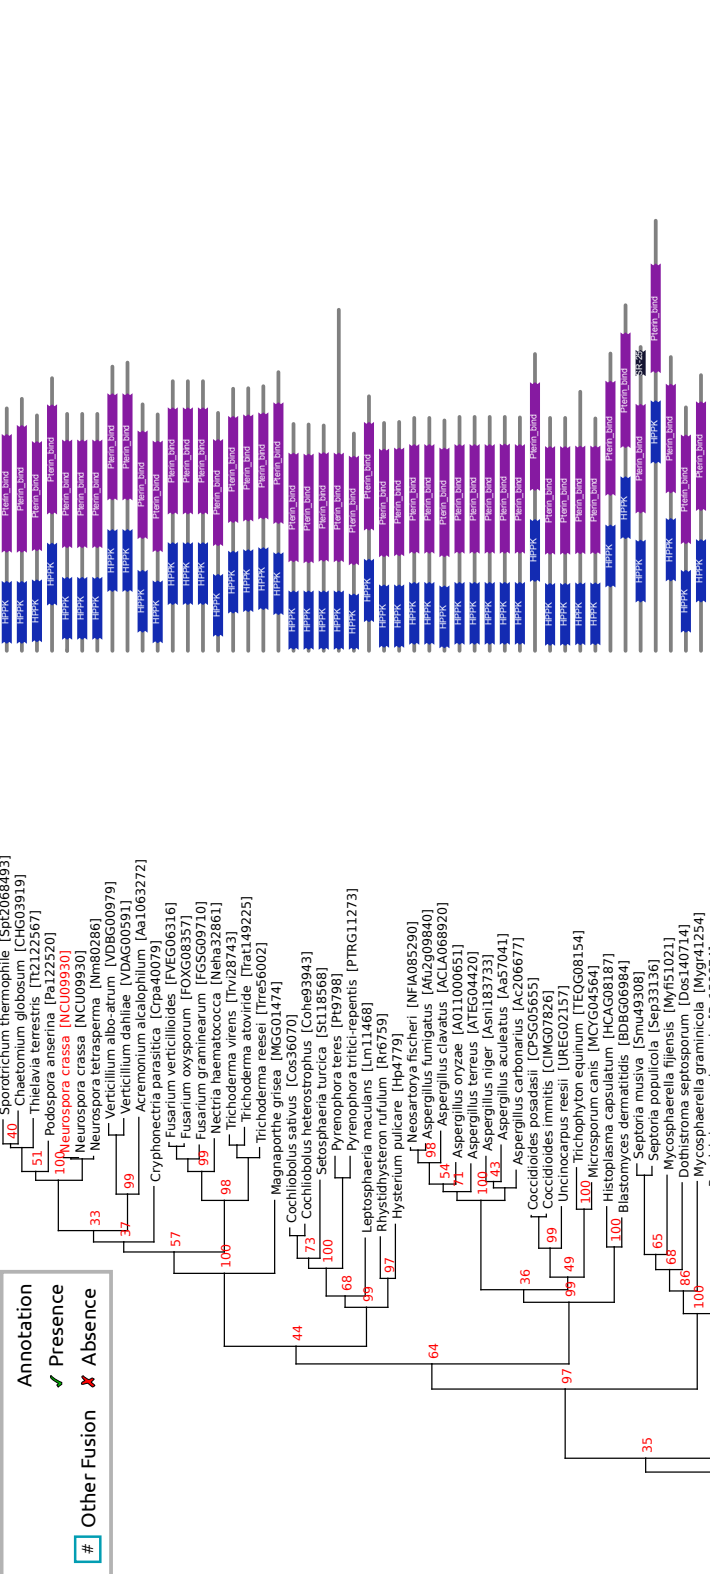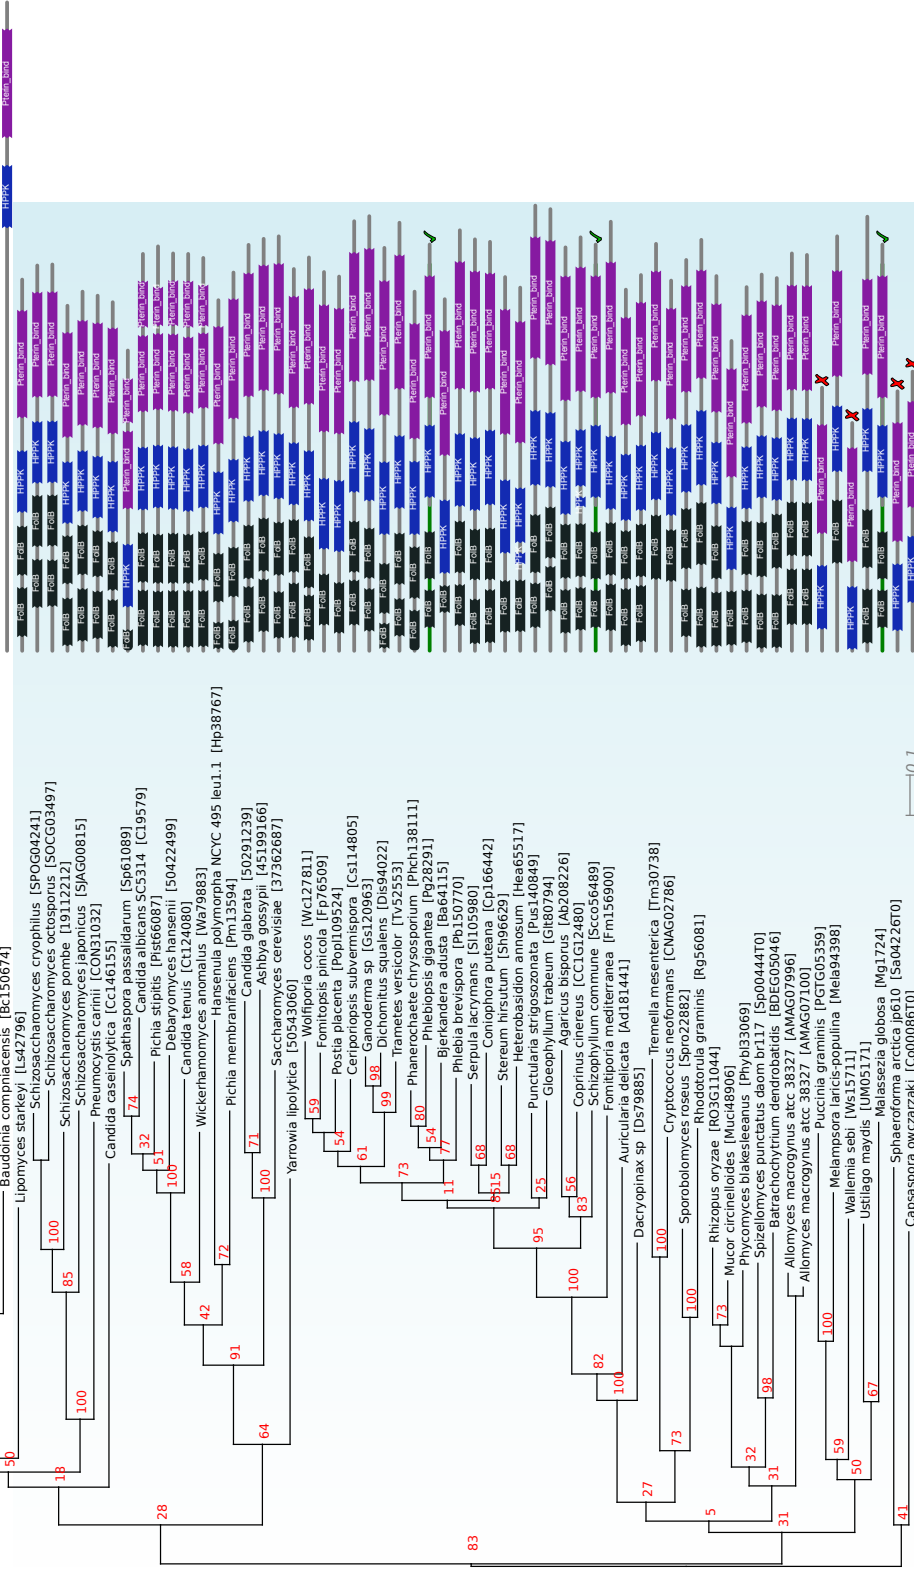

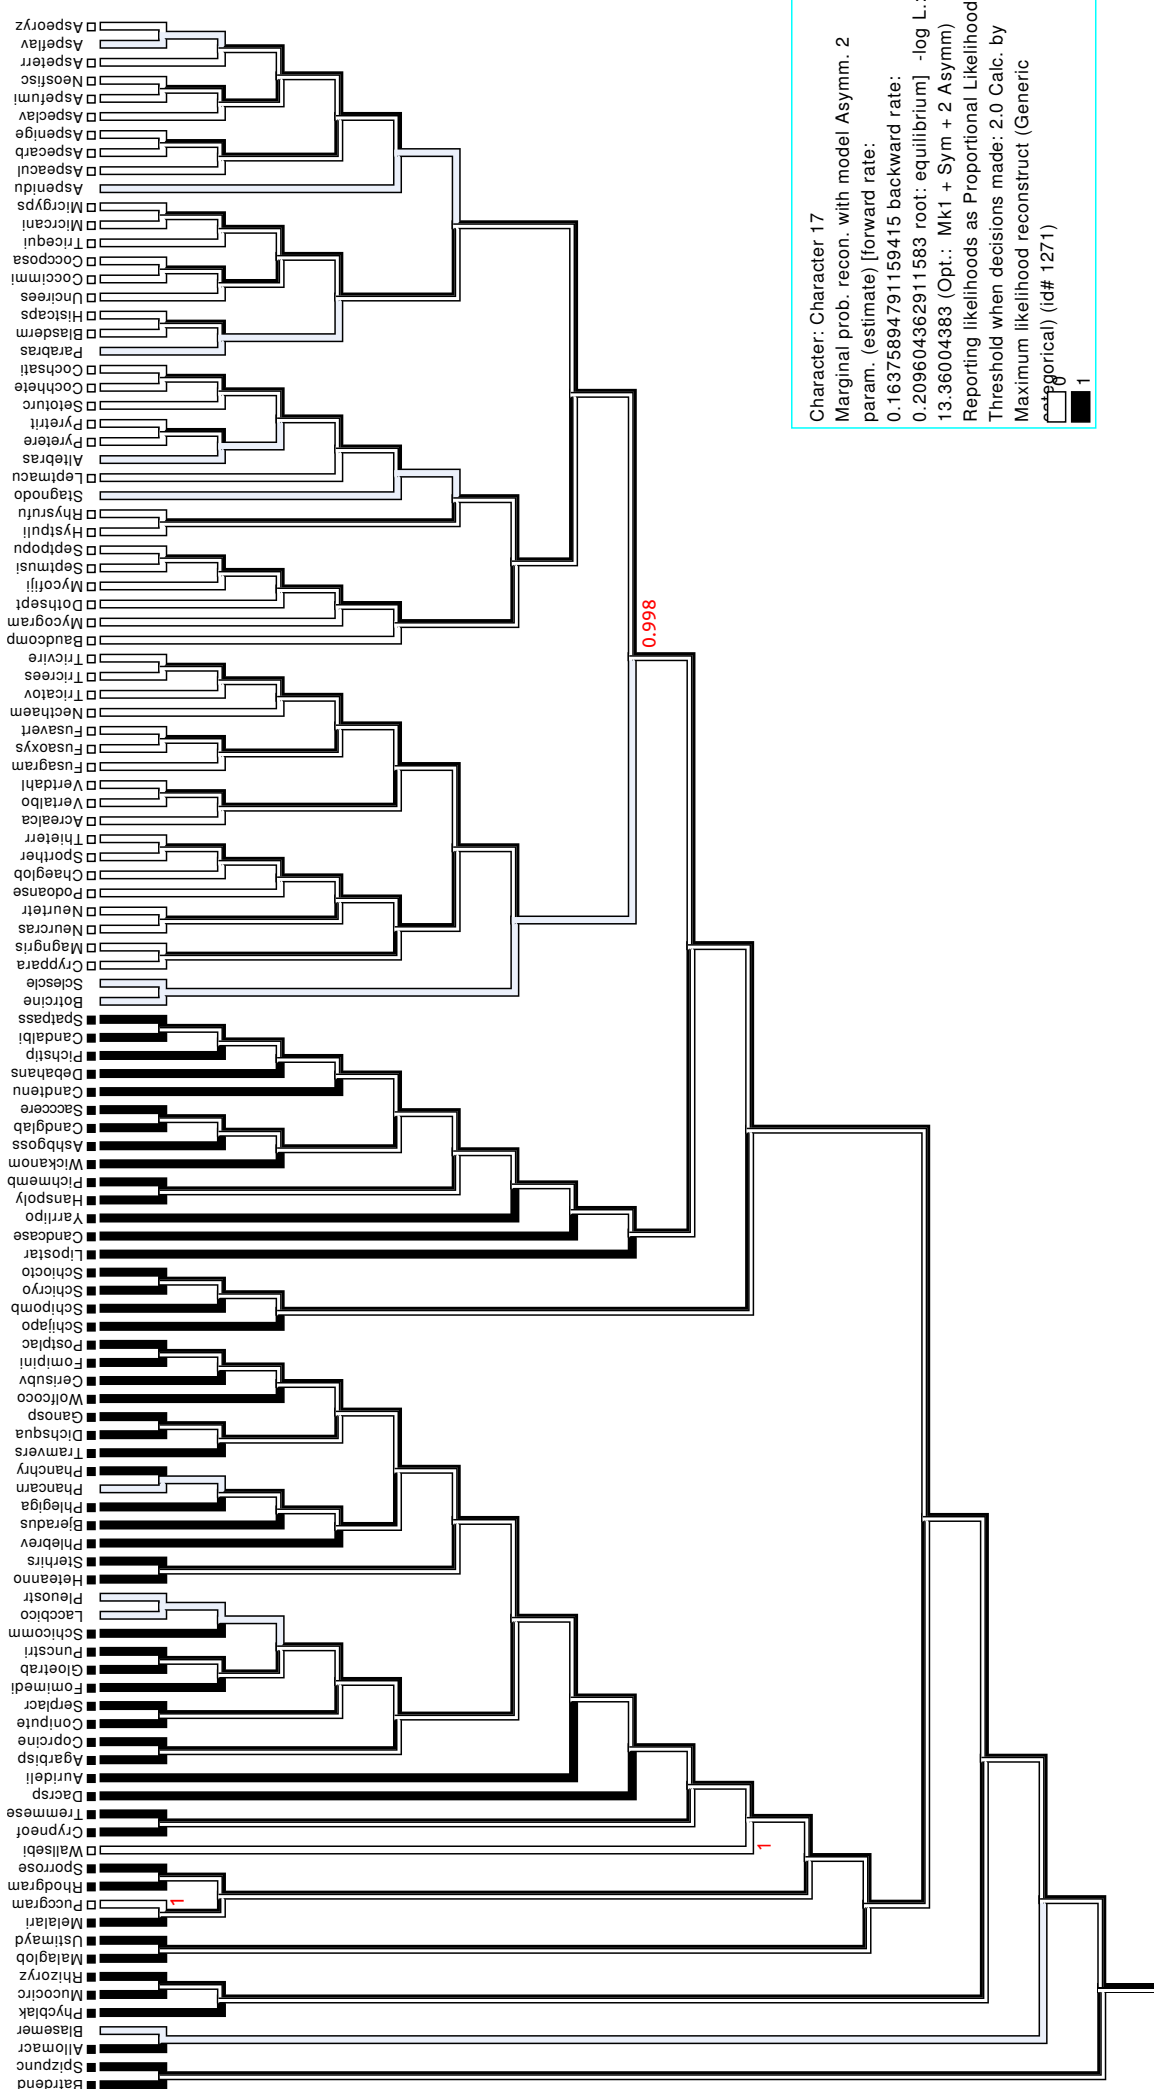

Character: Character 17  
 Marginal prob. recon. with model Asymm. 2  
 param. (estimate) [forward rate:  
 0.16375894791159415 backward rate:  
 0.209604362911583 root: equilibrium] -log L.:  
 13.36004383 (Opt.: Mk1 + Sym + 2 Asymm)  
 Reporting likelihoods as Proportional Likelihoods;  
 Threshold when decisions made: 2.0 Calc. by  
 Maximum likelihood reconstruct (Generic  
 Sgorial) (id# 1271)

# Putative Fusion 18

September 26, 2012

## 1 Fasta Sequences

These are the unfused sequences identified by fdfBLAST belonging to the putative gene fusion in FASTA format. Accessions may be shortened, but belong to either the taxons individual genome project or NCBI's accession numbering.

```
>lcl|NCU08029T0 unnamed protein product
MTPRLSTLDLVAKVDAFPYADRDPEAYAQIMKSFYTFVWEDQQGQVPIGYVKLDVVDALNKAPATLKGQLGLHIDVSNRT
VVLFRDAPDKTYEERTRLVGKLTALWREQEAFAILKSWRNELWPVYGRNKELVFSIERAAMGLFGTTRYGVHMNAFIRrq
DASSKYDLRIWVPKRSATKSTYPSMLDNAVAGGLMTNEDPFECVIREADEEASLSEHIVRNNAKEVCTITYIYITDERAG
GEAGLIYPECQWIYDLELPADGSVVPEPKDGEVESFSLCTVEEIQKQLAQGMWKPNCVVMLDFFVVRHGIYTPENEPHYD
AFRDRAHRHIAFPGPHQA
>lcl|NCU04944T0 unnamed protein product
MLGFGSKFIPTKLPSISRIFISFHVSPCRTCVTALPDLTFTTRGTQLFQLNNYKGRAIHSNETMGTTNGTTQSTGALDEGQ
IFEWYPLDLVRDYEQQKQHDHNDQLQNGSNGTTHKPEPFALVVLNQPLTHLGLVKRLWKNASIRVAADGGANCLYDVAGK
NGDHDFDDLTAIIGDLDLSTTETRITYFTTHSSSPTASQTAAIHEPSQYSTDFAKSVDYLRGSPSCSKPDAPPPDIVAIGGL
GGRVDQGLSQLHHLYLQSSPTYADGRMYLFSGESLTFLLKSGTHRIRVREPGQANQPEKDVFAKVVGILPVKEPSRIWT
KGLEWDVEDWPTEFGGQVSTSNHVLPETEVVEVRATKDVLFRTIALRDL
```

## 2 Annotated Phylograms

All trees were generated from an initial run of Darren's Orchard pipeline against 139 taxa (Table S1), using the above corresponding un-fused sequences as BLAST seeds. The alignments were then checked for any missing taxa, manually masked and then ProtTest3 was run, please see the Methods section for detail. The final trees were generated by the following command:

```
phyml -i alignment_file -d aa -b 100 -m model -c 8 -v invariant_sites -s BEST --quiet
-a gamma
```

Styling and annotation was made possible by Dendroscope and Inkscape.

## 3 Mesquite Cladogram

This tree is the 68-gene concatenated phylogeny (Fig. 1), with the presence of a fusion (black), presence of a fission (white), and absent/undetermined (grey) status of gene fusion characters plotted on to it using a "1/0/-" nexus-style data matrix. We used the program 'Mesquite' to calculate proportional likelihoods based on either an "Mk1" or "Assym. 2 param model." (see Table S4) of character change across the fungal phylogeny (Fig. 1). This allowed for a proportional likelihood of the position of the fusion/fission to be calculated.

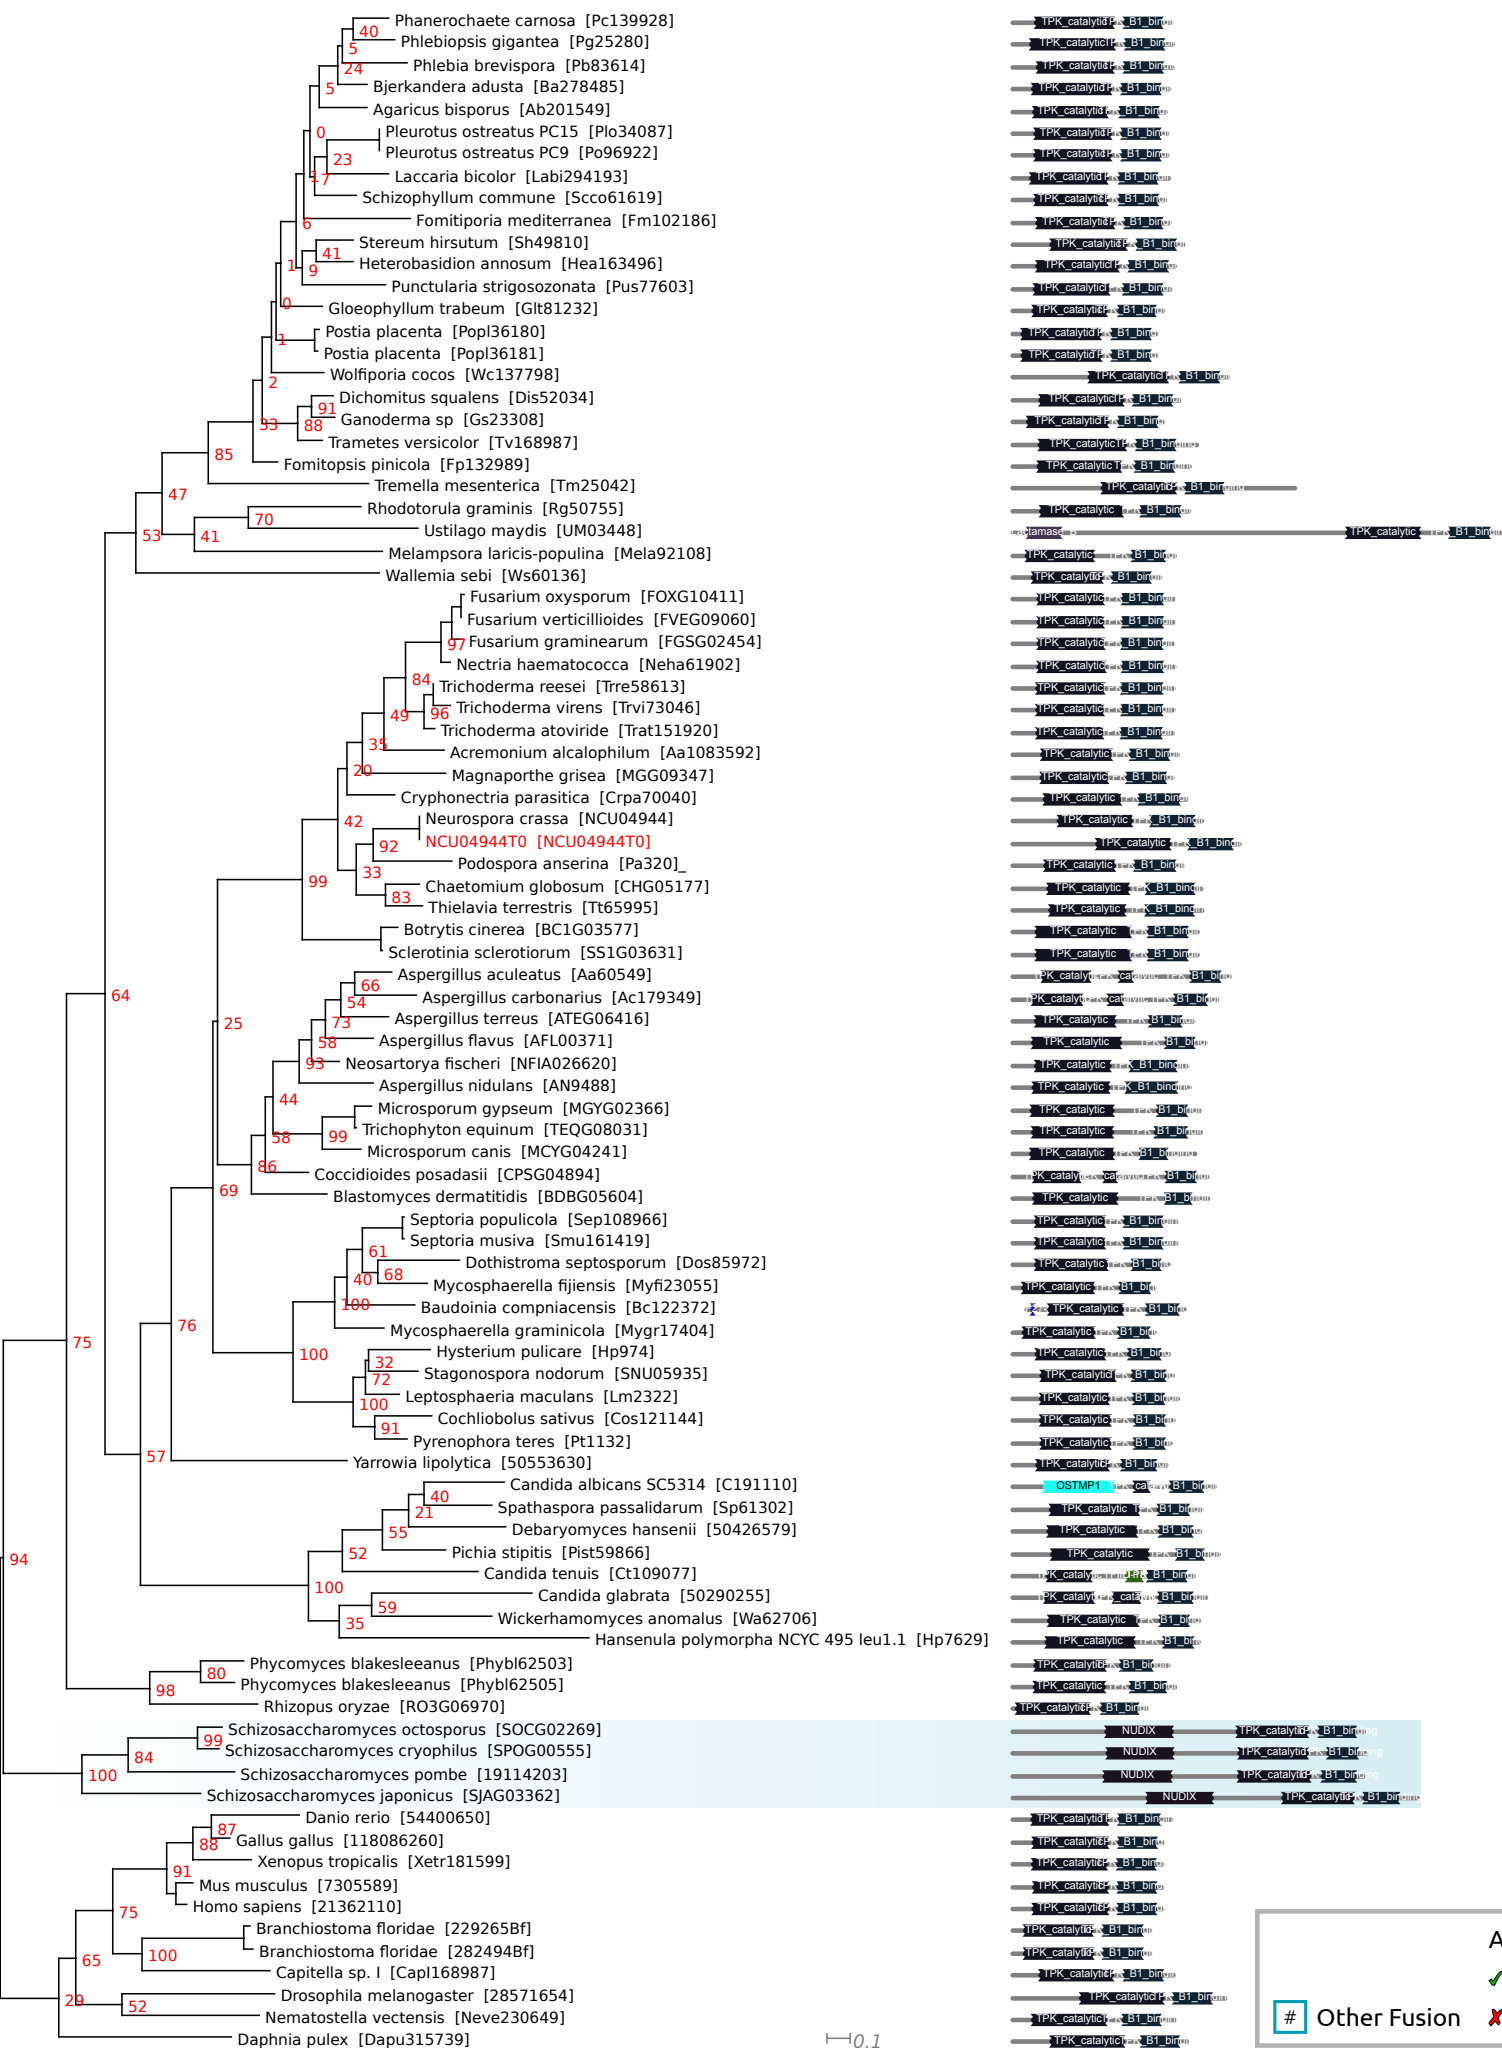

Annotation

- ✓ Presence
- ✗ Absence
- # Other Fusion

0.1









# Putative Fusion 19

September 26, 2012

## 1 Fasta Sequences

These are the unfused sequences identified by fdfBLAST belonging to the putative gene fusion in FASTA format. Accessions may be shortened, but belong to either the taxons individual genome project or NCBI's accession numbering.

```
>lcl|CC1G00485 unnamed protein product
MQALLKDVDMAFANHNPALQPKHRELTAEPVAEAEAELEEVYESFESPEDTLDRKSPAALFGSQKIGQVVVPPQLQDAIV
ALIDESDKGLLHSDAKRLFGGLHNPVDSGWLVLQDTKYRSRKQGERHADRDIAFAAVVLP AHYAAVA AVLEHVKHRLG
SSWEVERVIDWGAGAGTGLWASLFSFQSAGASHEPEGVDASQSTLRSYLGIDKRQAMVALAERIQNNITPPEGFSLQFKK
TFSEEDNVPREEGKTVALSAFTLSSLPTPLARKALVKEMWESGAHTLVLMDHNTKEGFESIAQAREYLLRQGRKEVEKS
EAESPSSLEGAYVVAPCPHDSACPLLNSGSNRLVCGFNQRLQRPSFVRLTKHSGIGHEDIGYTYVVIQRGSRPGKVESQL
GRVGLVGRWEQEAKLTKVVKELQLFDQASPEVPLASKSAVPAEPESEAEVHETLRQEAYHWPRLVFPMPKKS GHVILDS
CTSEGKIVRMTIPKSGKQPYDARKSAWGDLPHPKPNPPQERVVIRDVEGKALSVERDHIGKNSSTRPAKKADKKYSE
HLASTIREAKKAKRRWERNVKSSVIWDKDD
>lcl|CC1G06294 unnamed protein product
MSFLRGIGIQSARQFAFASRQTYYYQAWRMSCRRHASTTPTPAPRPTTTTSTPPPLTGNAPPRPKFKTREQVYRERNQAL
FMYTSAVILFAVGASYAAVPLYRMFCAATGFAGTPKVGTRFEPERLVPVENARRIKVHFNADKSEQLPWKFTPQQKFVN
VLPGESSLAFYTAKN DSEQDIIGIATYNVTPDRVAPYFSKVECFEFAQKLLAGEEIDMPLFFIDKDILED PACRNVQD
VVLSTYTFRRARNKFGHLEPDATDDAVQSSSLGFDKFEHGSSSSSSEKSS
```

## 2 Annotated Phylograms

All trees were generated from an initial run of Darren's Orchard pipeline against 139 taxa (Table S1), using the above corresponding un-fused sequences as BLAST seeds. The alignments were then checked for any missing taxa, manually masked and then ProtTest3 was run, please see the Methods section for detail. The final trees were generated by the following command:

```
phyml -i alignment_file -d aa -b 100 -m model -c 8 -v invariant_sites -s BEST --quiet
-a gamma
```

Styling and annotation was made possible by Dendroscope and Inkscape.

## 3 Mesquite Cladogram

This tree is the 68-gene concatenated phylogeny (Fig. 1), with the presence of a fusion (black), presence of a fission (white), and absent/undetermined (grey) status of gene fusion characters plotted on to it using a "1/0/-" nexus-style data matrix. We used the program 'Mesquite' to calculate proportional likelihoods based on either an "Mk1" or "Assym. 2 param model." (see Table S4) of character change across the fungal phylogeny (Fig. 1). This allowed for a proportional likelihood of the position of the fusion/fission to be calculated.

**Annotation**  
 ✓ Presence  
 ✗ Absence  
 # Other Fusion

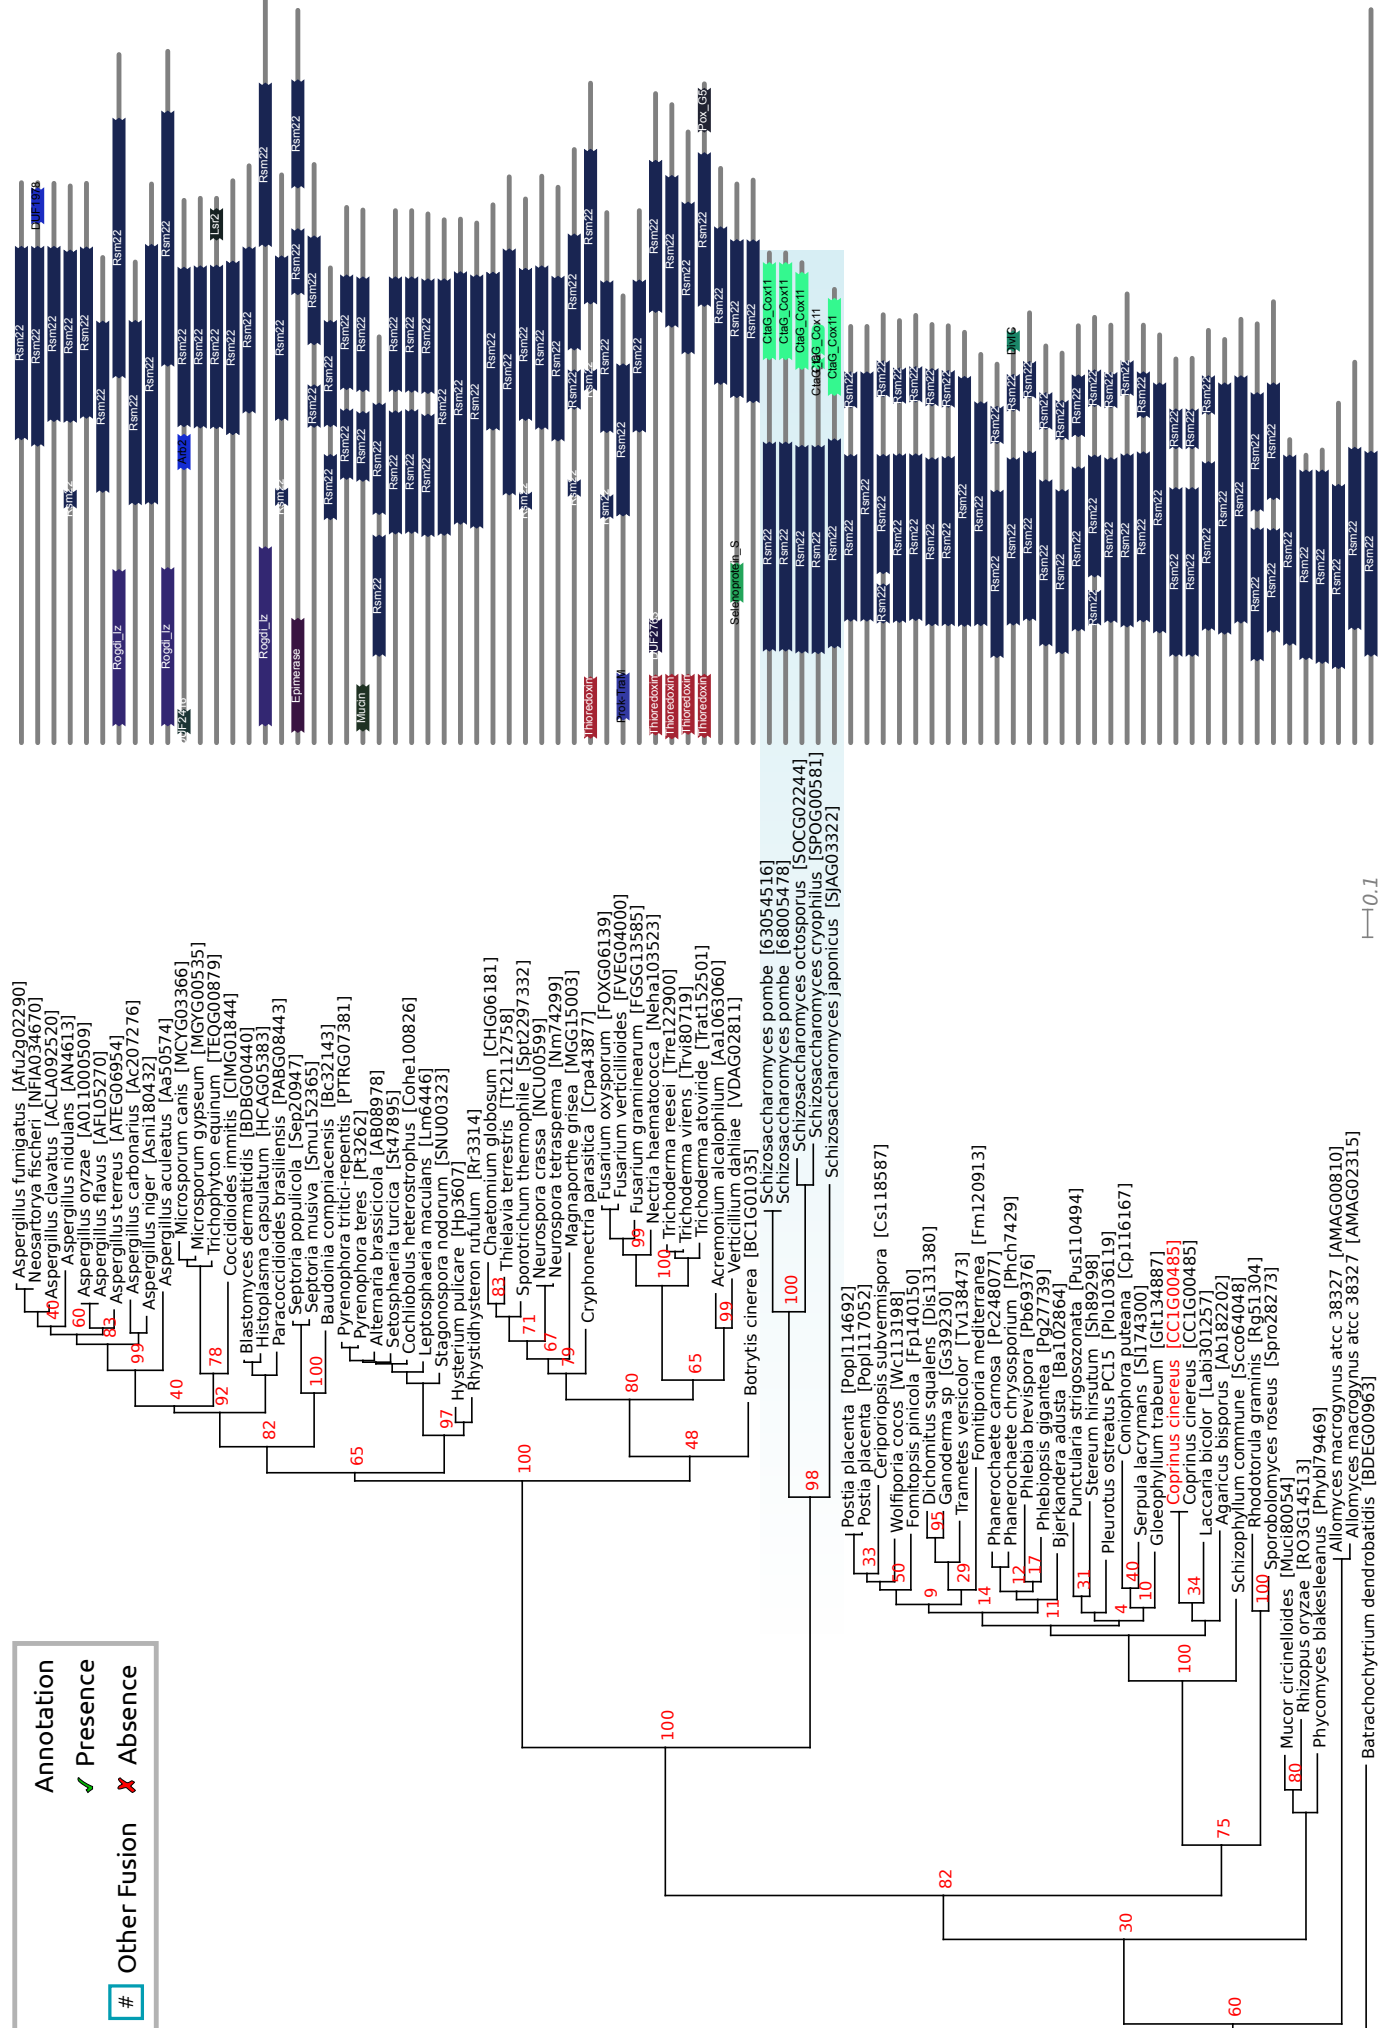

Annotation

✓ Presence

✗ Absence

# Other Fusion

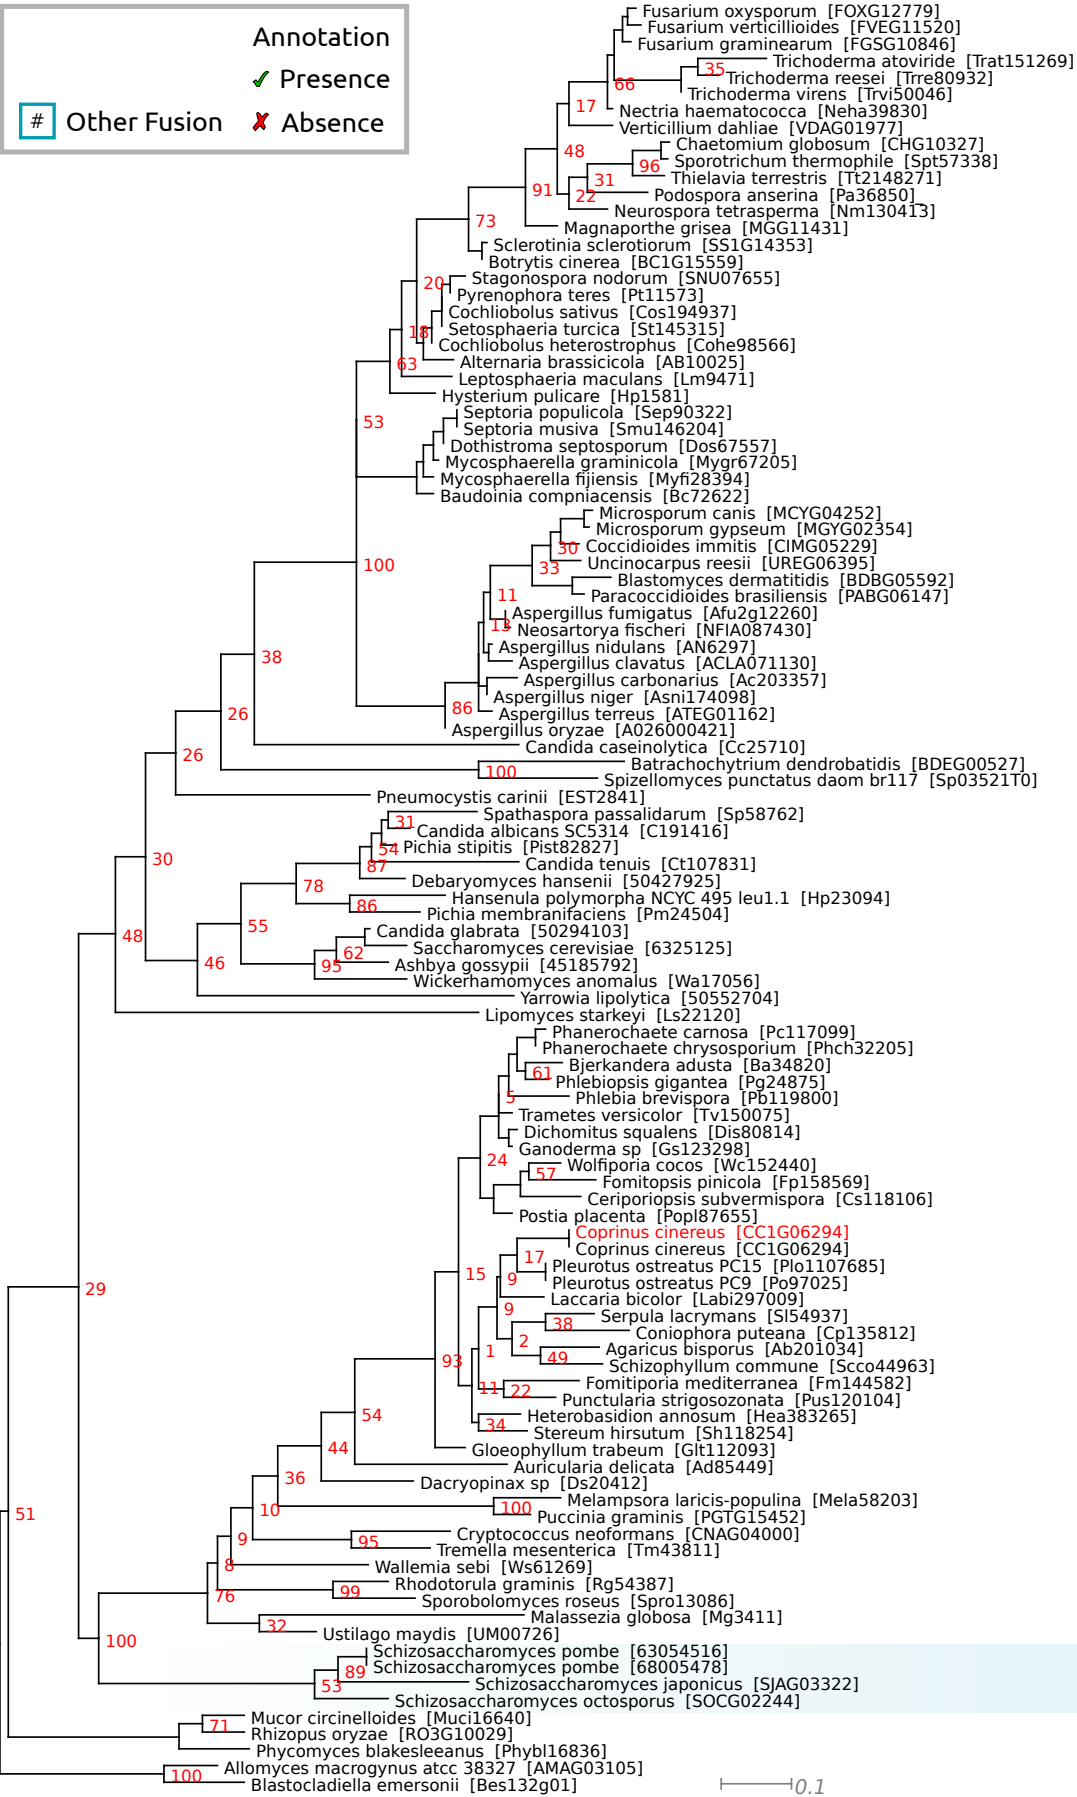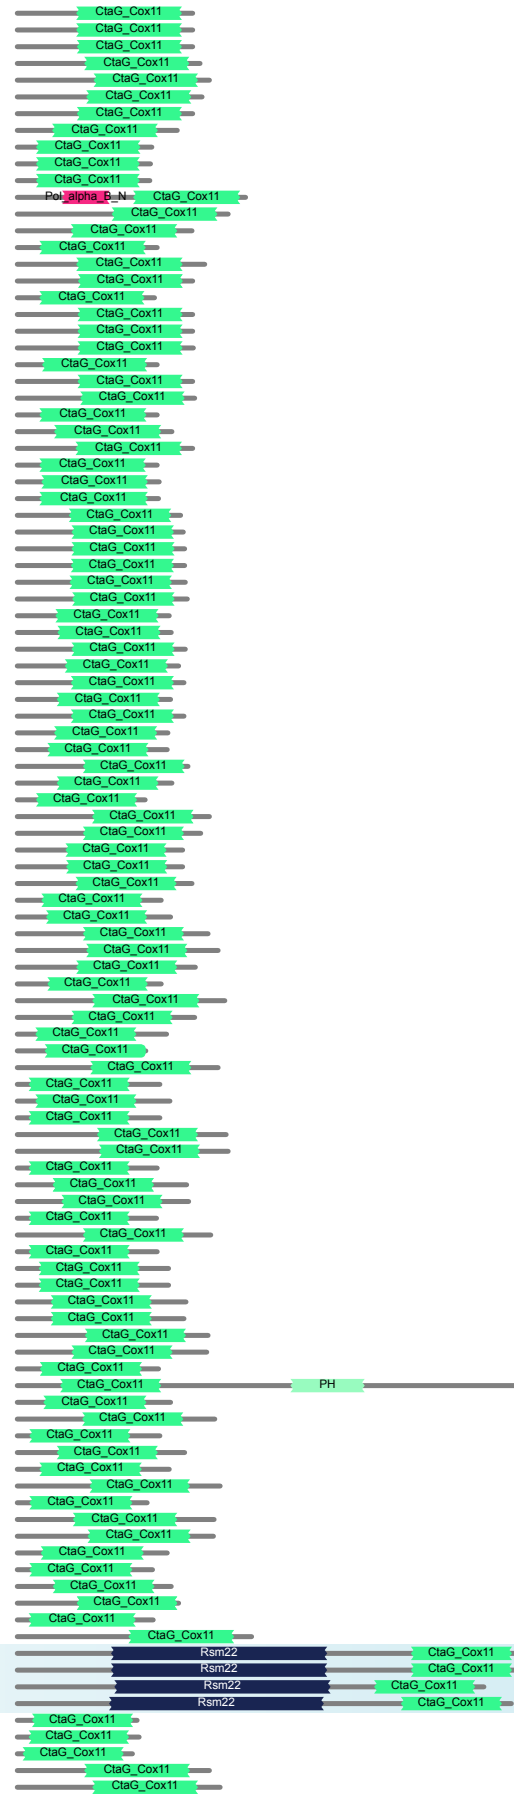



# Putative Fusion 20

September 26, 2012

## 1 Fasta Sequences

These are the unfused sequences identified by fdfBLAST belonging to the putative gene fusion in FASTA format. Accessions may be shortened, but belong to either the taxons individual genome project or NCBI's accession numbering.

```
>lcl|Mc138671 unnamed protein product
MTSILNRAAFVYGRKTAFSGIARSISTIQKPNYAFAFDIDGVLIKGRRIPEATRALKLLNGDNAHNRNIPFVLLTNGG
GVTEEEKARQISELVGKIDPKQVILSHSPMQNLATKYNDKRVLIIIGGKGRNCYDVAKKYGFKEAVTPHDMHWNSSSWP
HSTPTSDLSMLTSTFSNLPPIHAVMVFHDTYDWGRDLQIMLDALCSQDGIIGTRKSDYTIQDVPLYWSNNDLIWSTDFPAP
RLGQGAFKIALDSLYKTLTGHDLKSTSFGKPHGATYQFAEQVLASLEPGSQPNHSRRVYAVGDNPASDIRGANDYGWTS
MLVRTGIFTGNGNASDFPADIVCENVEEAVESIIAREEKHQ
>lcl|Mc161540 unnamed protein product
MASSRIKPMPSKAHWIKLATFTKPVVRINTWRPLQRCFNNSLQKQASSPPPHKEDKDKKSFKEELKEDIYTIPTNLLTFGRL
AAAPCVGYMILQQNYDGALVLFALAGFTDLLDGHIAKRYNMKTLLGTIIDPLADKVLMTVMTVTLAMEGTLPVPLAAIIL
GRDAGLVLSAFYYRYISLPEPKTVARYFDGSIPSAEVKPTQISKINTALQLLLMGFSLTTVSMGMPSSSEAMTALQWVVG
TTVWVGASYVFSKDAVRILK
```

## 2 Annotated Phylograms

All trees were generated from an initial run of Darren's Orchard pipeline against 139 taxa (Table S1), using the above corresponding un-fused sequences as BLAST seeds. The alignments were then checked for any missing taxa, manually masked and then ProtTest3 was run, please see the Methods section for detail. The final trees were generated by the following command:

```
phym1 -i alignment_file -d aa -b 100 -m model -c 8 -v invariant_sites -s BEST --quiet
-a gamma
```

Styling and annotation was made possible by Dendroscope and Inkscape.

## 3 Mesquite Cladogram

This tree is the 68-gene concatenated phylogeny (Fig. 1), with the presence of a fusion (black), presence of a fission (white), and absent/undetermined (grey) status of gene fusion characters plotted on to it using a "1/0/-" nexus-style data matrix. We used the program 'Mesquite' to calculate proportional likelihoods based on either an "Mk1" or "Assym. 2 param model." (see Table S4) of character change across the fungal phylogeny (Fig. 1). This allowed for a proportional likelihood of the position of the fusion/fission to be calculated.

# Other Fusion
 ✓ Presence
✗ Absence

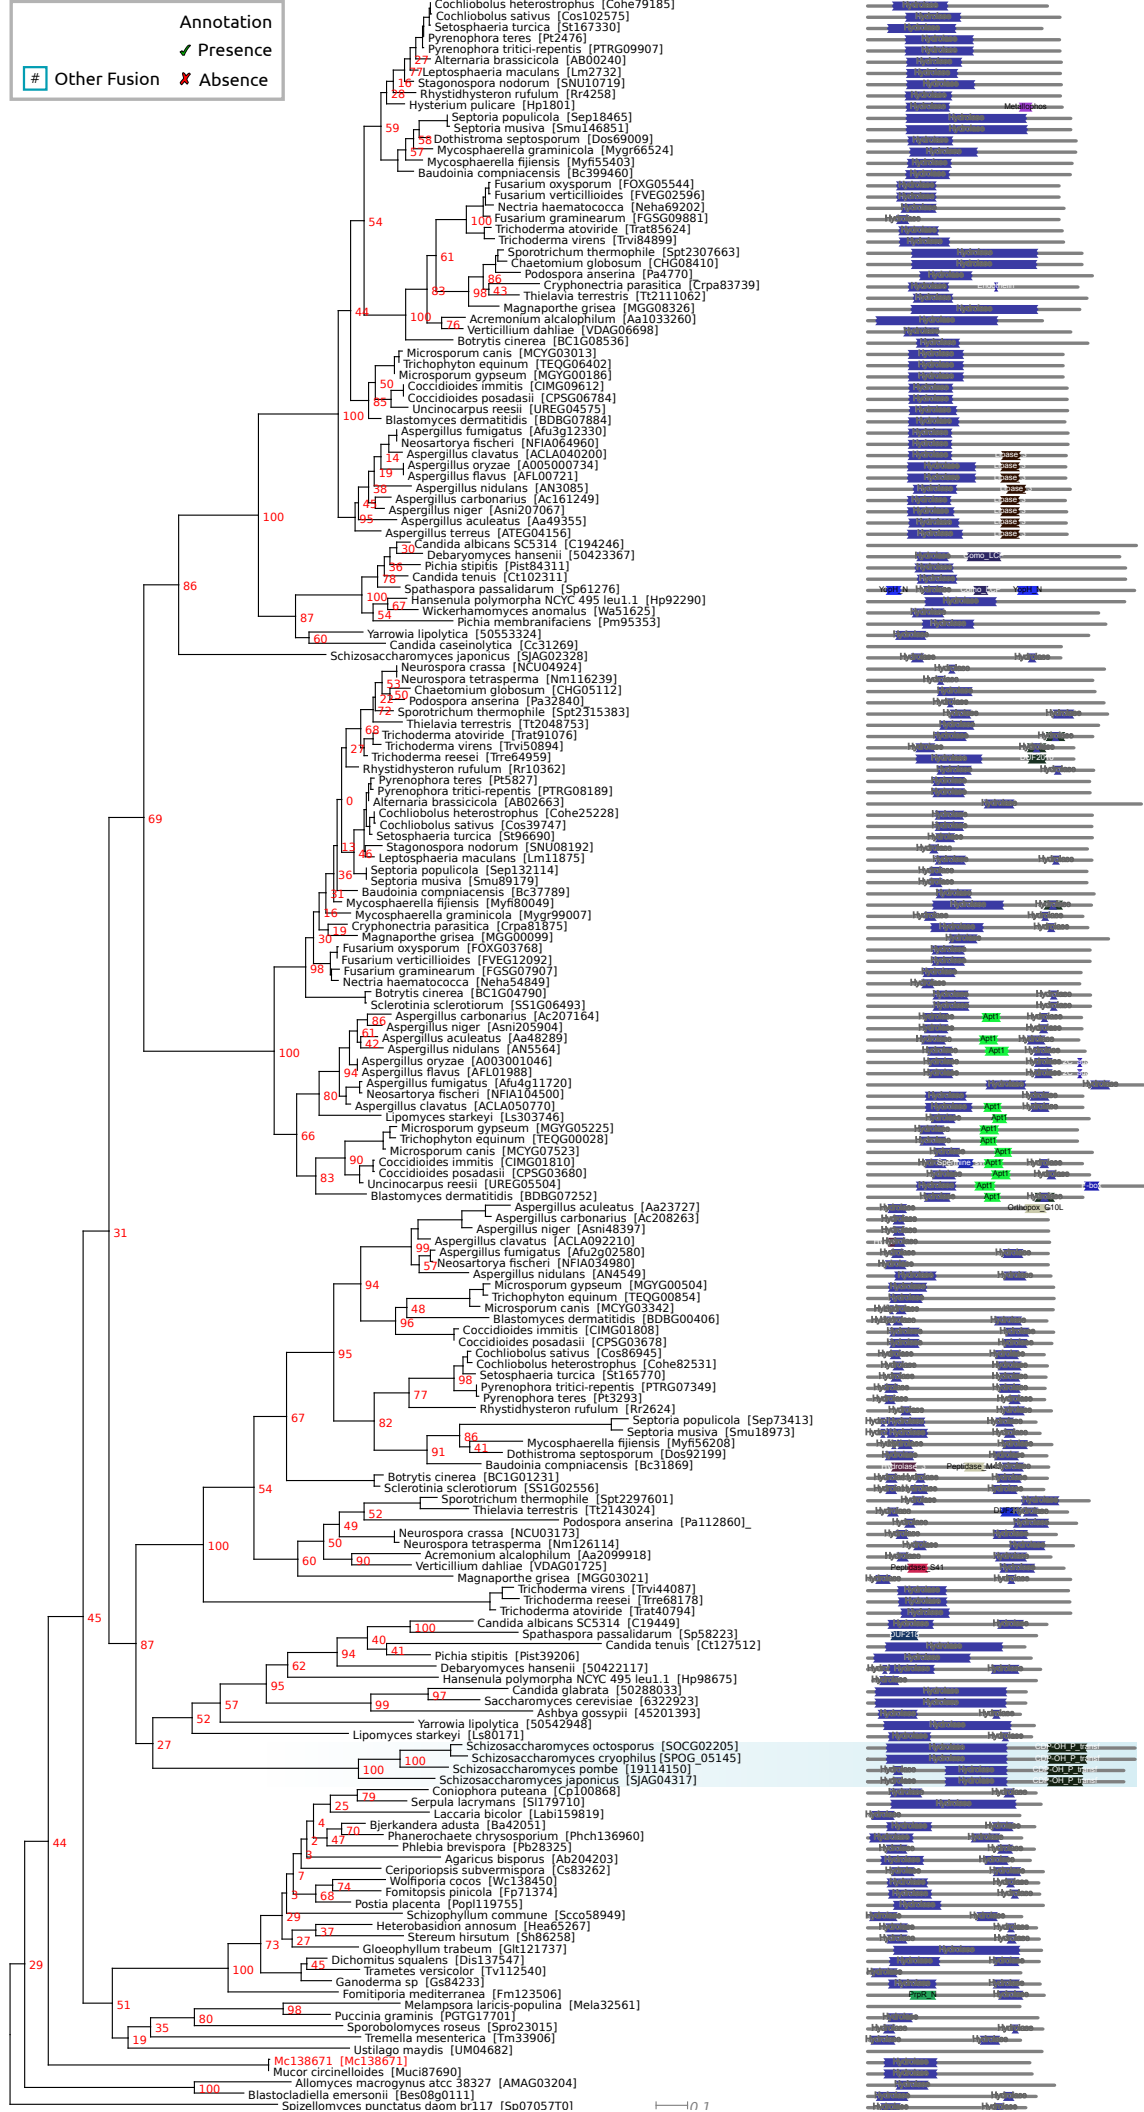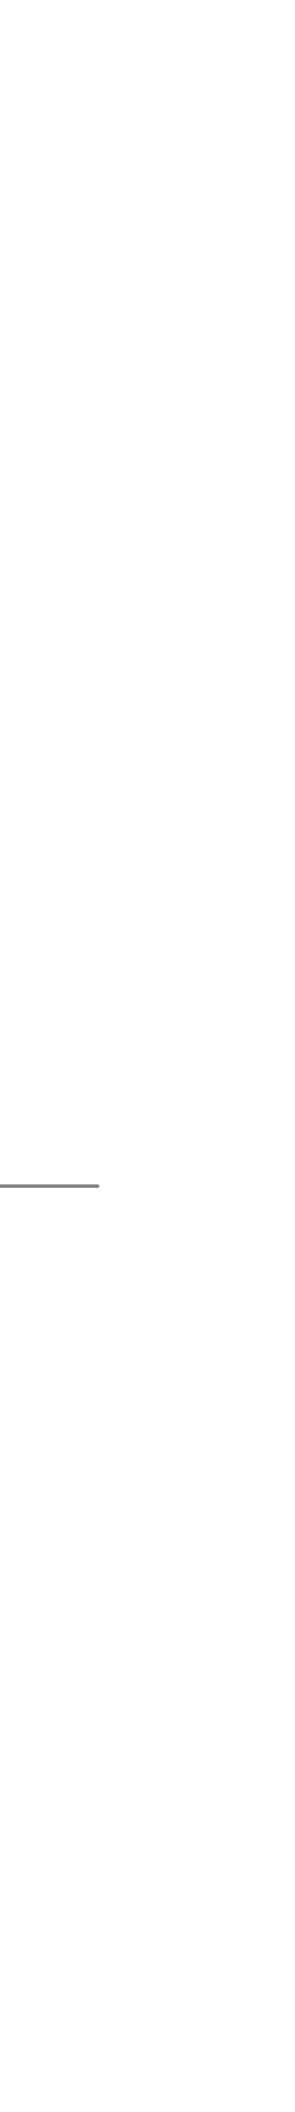



Annotation

✓ Presence

✗ Absence

# Other Fusion

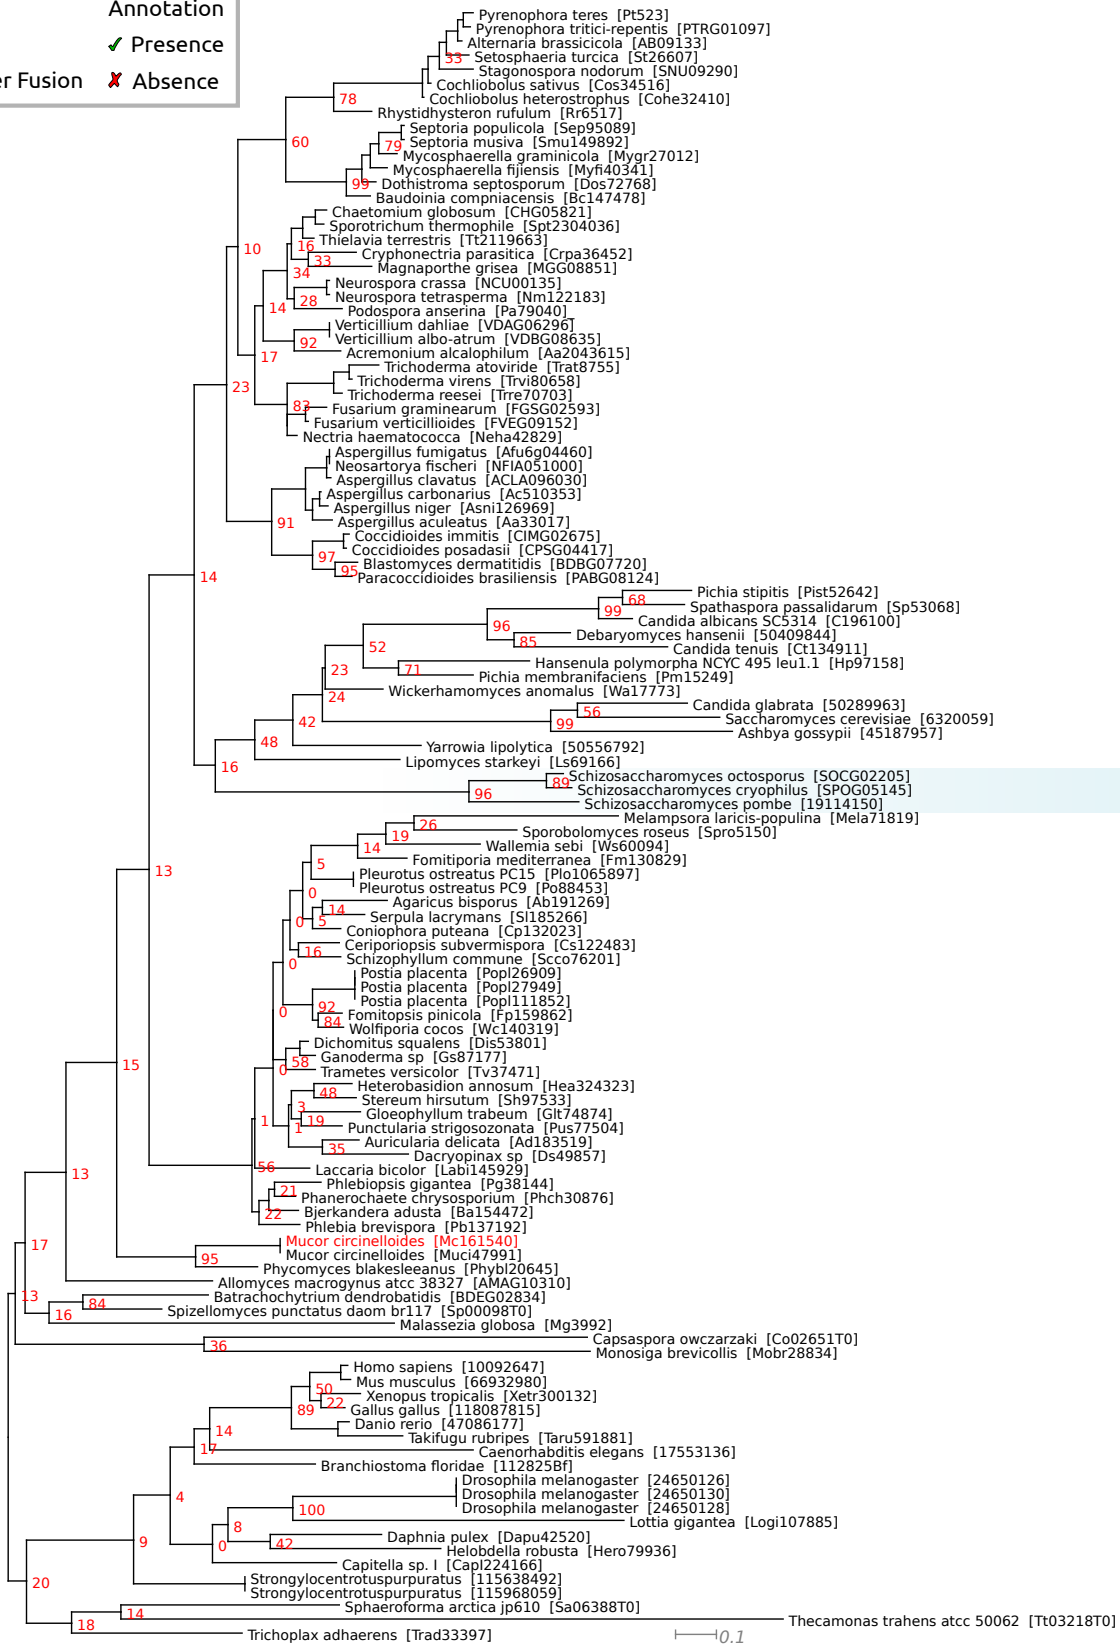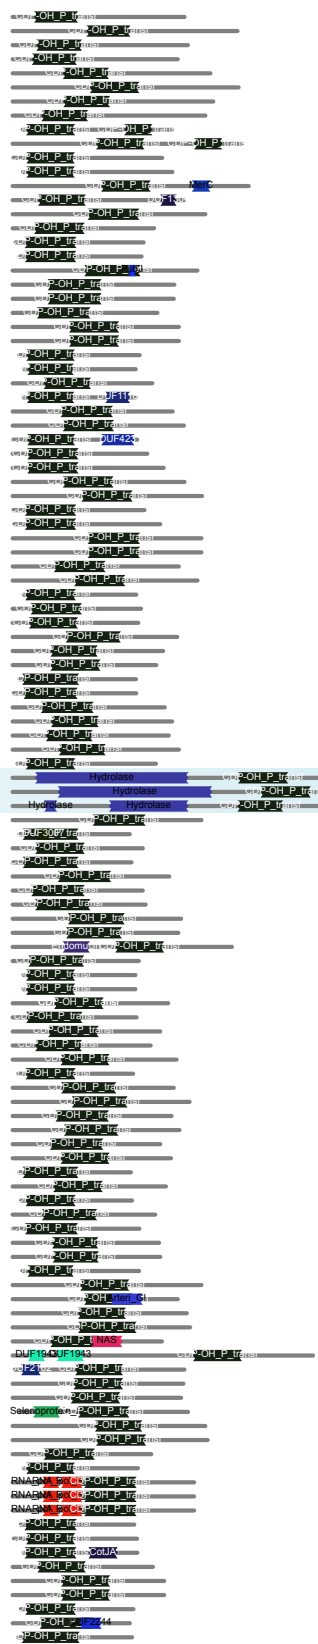

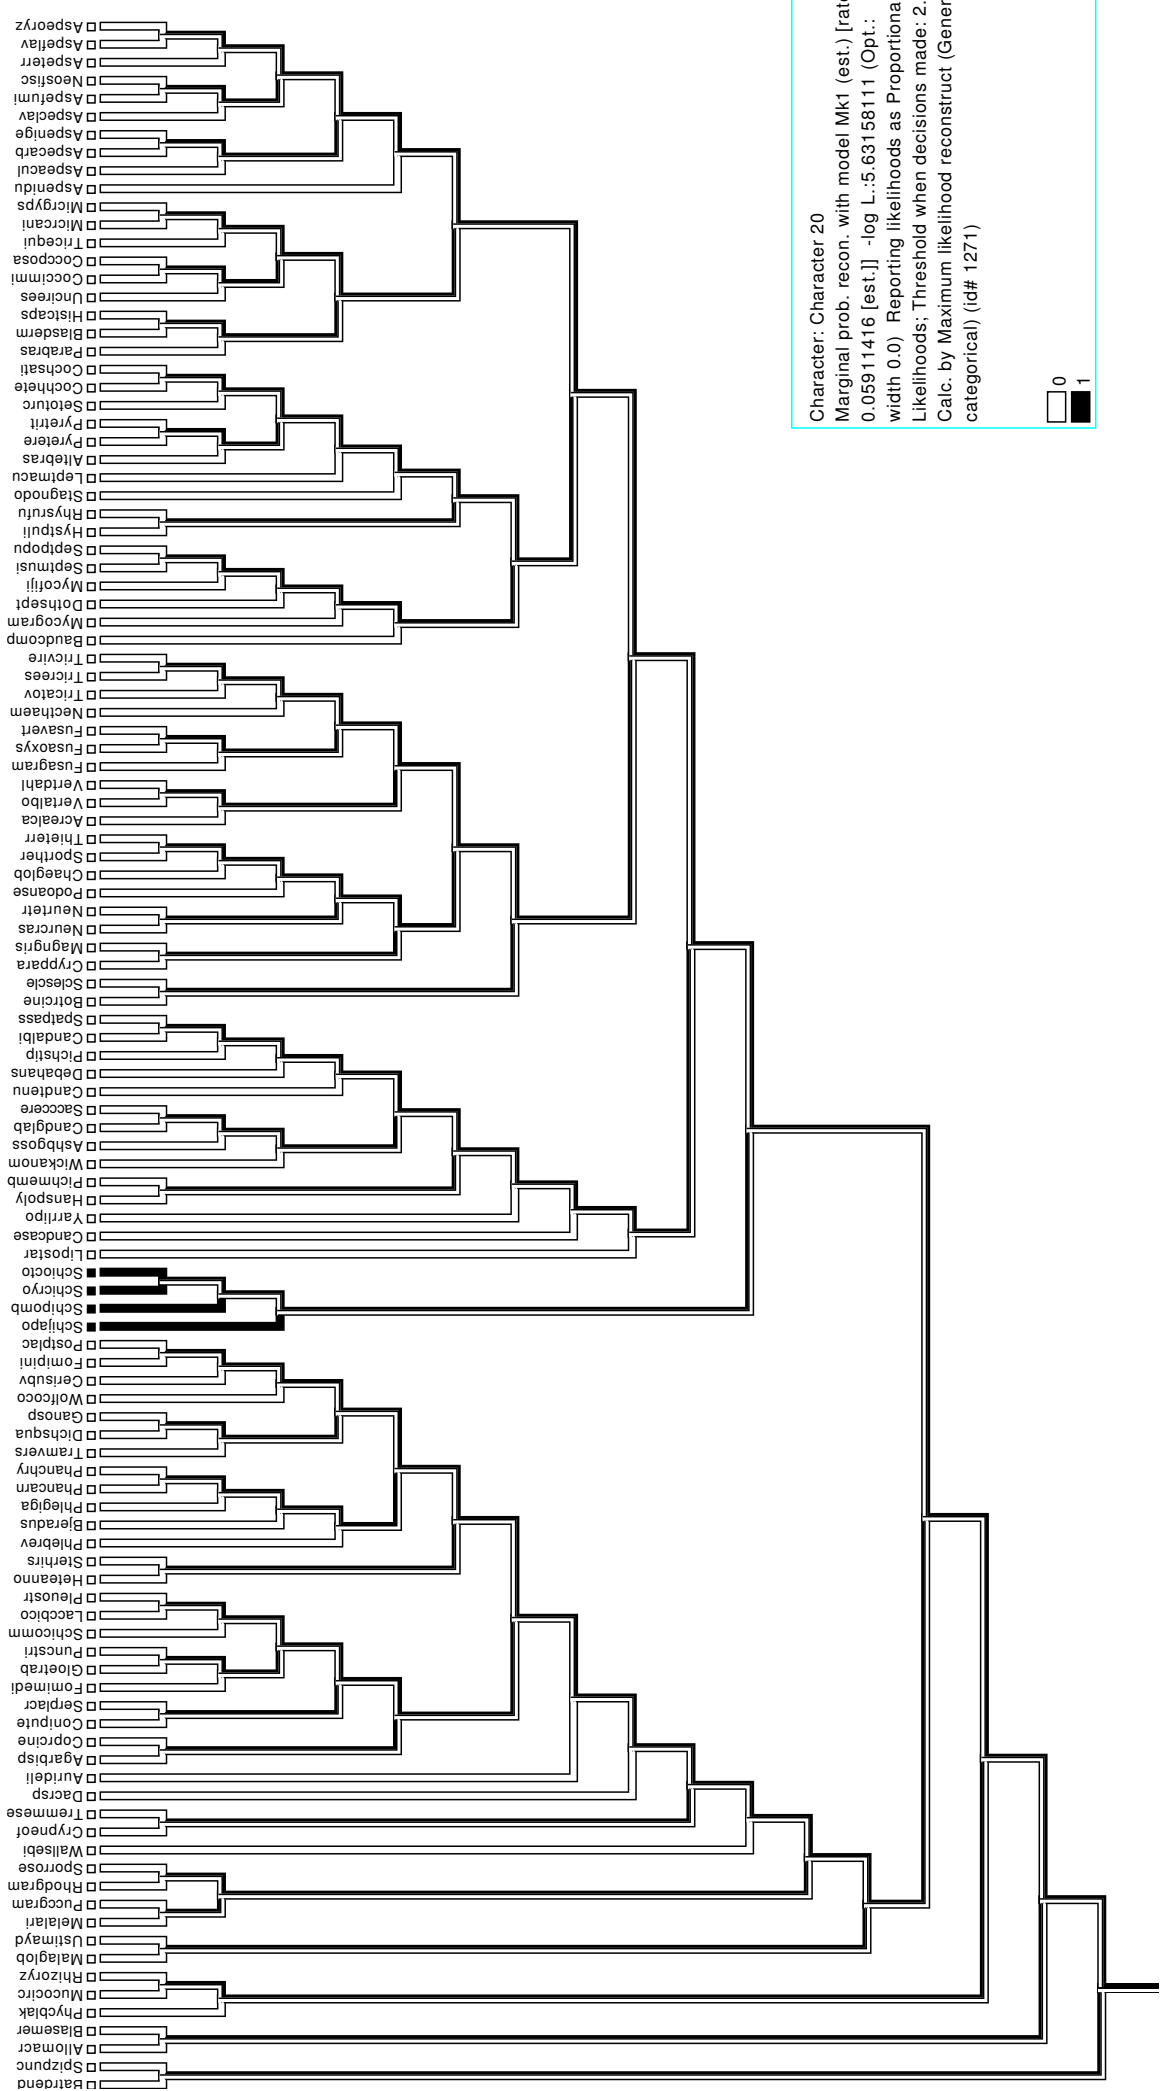

- Rätrend
- Spizunc
- Allomacr
- Blasemer
- Phyciak
- Mucocitc
- Rhizoryz
- Malaglob
- Ustimayd
- Melatari
- Puccgram
- Rhodgram
- Sporose
- Wallisei
- Cypneot
- Tremmese
- Dacrsp
- Aurideli
- Agarhisp
- Coprine
- Conipute
- Serplacr
- Fomimedi
- Gloetrab
- Punctri
- Schicom
- Laccbico
- Pleustr
- Heteanno
- Sterhirs
- Phlebrev
- Bjeradus
- Phlegiga
- Phancarn
- Phanchry
- Tamvers
- Dichsqua
- Ganosp
- Wolfcoco
- Cersubv
- Fomipini
- Postplac
- Schijapo
- Schipomb
- Schicryo
- Schiocto
- Lipostar
- Candcace
- Yarrilpo
- Hanspoly
- Pchmemb
- Wikanom
- Ashbgoss
- Candglab
- Saccere
- Candtenu
- Debahans
- Pchstip
- Candabi
- Spatpass
- Botcine
- Sclcsle
- Cyppara
- Magngfris
- Neurcras
- Neutrtr
- Podanse
- Chaeglob
- Sporther
- Thieterr
- Acrealca
- Vertalbo
- Verdahl
- Fusagram
- Fusaoxys
- Fusavert
- Necthaem
- Tricatov
- Tricrees
- Tricvire
- Baudcomp
- Mycogram
- Dothsept
- Mycotiji
- Sepimusl
- Sepipou
- Hyspuli
- Rhystrfu
- Stagnodo
- Lepimacu
- Aliebras
- Pyeter
- Pyetrit
- Setiure
- Coohete
- Cochsati
- Parabras
- Blasderm
- Histcaps
- Uncrees
- Cocctmli
- Cocoposa
- Tricqui
- Micrcani
- Micryps
- Aspendu
- Aspacul
- Aspacarb
- Aspacige
- Aspaclav
- Aspacumt
- Neostisc
- Aspeterr
- Aspetlav
- Aspetryz

# Putative Fusion 21

September 26, 2012

## 1 Fasta Sequences

These are the unfused sequences identified by fdfBLAST belonging to the putative gene fusion in FASTA format. Accessions may be shortened, but belong to either the taxons individual genome project or NCBI's accession numbering.

```
>lcl|6320989Sc unnamed protein product
MLFRNIEVGRQAAKLLTRTSSRLAWQSIGASRNISTIRQQIRKTQLYNFKKTVSIRPFSLSSPVFKPHVASESNPIESRL
KTSKNVAYWLLIGTSGLVFGIVVLGGLTRLTESGLSITWKPVTGTLPPMNQKEWEEEFIKYKESPEFKLLNSHIDLDEFK
FIFMEWIHRLWGRAIGAVFILPAVYFAVSKKTSGHVNRKLFGLAGLLGLQGFVGGWMMVKSGLDQEQLDARKSKPTVSQY
RLTTHLGTAFFLYMGMLWTGLEILRECKWIKNPVQAISLFFKKLDNPAIGPMRKISLALLAVSFLTAMSGGMVAGLDAGWV
YNTWPKMGERWFPSSRELMDENFCRREDKDKDLWWRNLLNPVTVQLVHRTCAYVAFTSVLAAHMYAIIKKKAVIPRNAMTS
LHVMGVTTLQATLGILTILYLPISLASIHQAGALALLTSSLVFASQLRKPRAPMRNVIITLPHSSKVTSGKILSEASK
LASKPL
>lcl|73530106Sc unnamed protein product
EELKITFILKDGSKTYEVCEGETILDIAQGHNLDMEGACGGSCACSTCHVIVDPDYDALPEPEDDENDMLDLAYGLTE
TSRLGCQIKMSKDIDGIRVALPQMTRNVNNNDFS
```

## 2 Annotated Phylograms

All trees were generated from an initial run of Darren's Orchard pipeline against 139 taxa (Table S1), using the above corresponding un-fused sequences as BLAST seeds. The alignments were then checked for any missing taxa, manually masked and then ProtTest3 was run, please see the Methods section for detail. The final trees were generated by the following command:

```
phym1 -i alignment_file -d aa -b 100 -m model -c 8 -v invariant_sites -s BEST --quiet
-a gamma
```

Styling and annotation was made possible by Dendroscope and Inkscape.

## 3 Mesquite Cladogram

This tree is the 68-gene concatenated phylogeny (Fig. 1), with the presence of a fusion (black), presence of a fission (white), and absent/undetermined (grey) status of gene fusion characters plotted on to it using a "1/0/-" nexus-style data matrix. We used the program 'Mesquite' to calculate proportional likelihoods based on either an "Mk1" or "Assym. 2 param model." (see Table S4) of character change across the fungal phylogeny (Fig. 1). This allowed for a proportional likelihood of the position of the fusion/fission to be calculated.

✓ Presence  
✗ Absence  
# Other Fusion

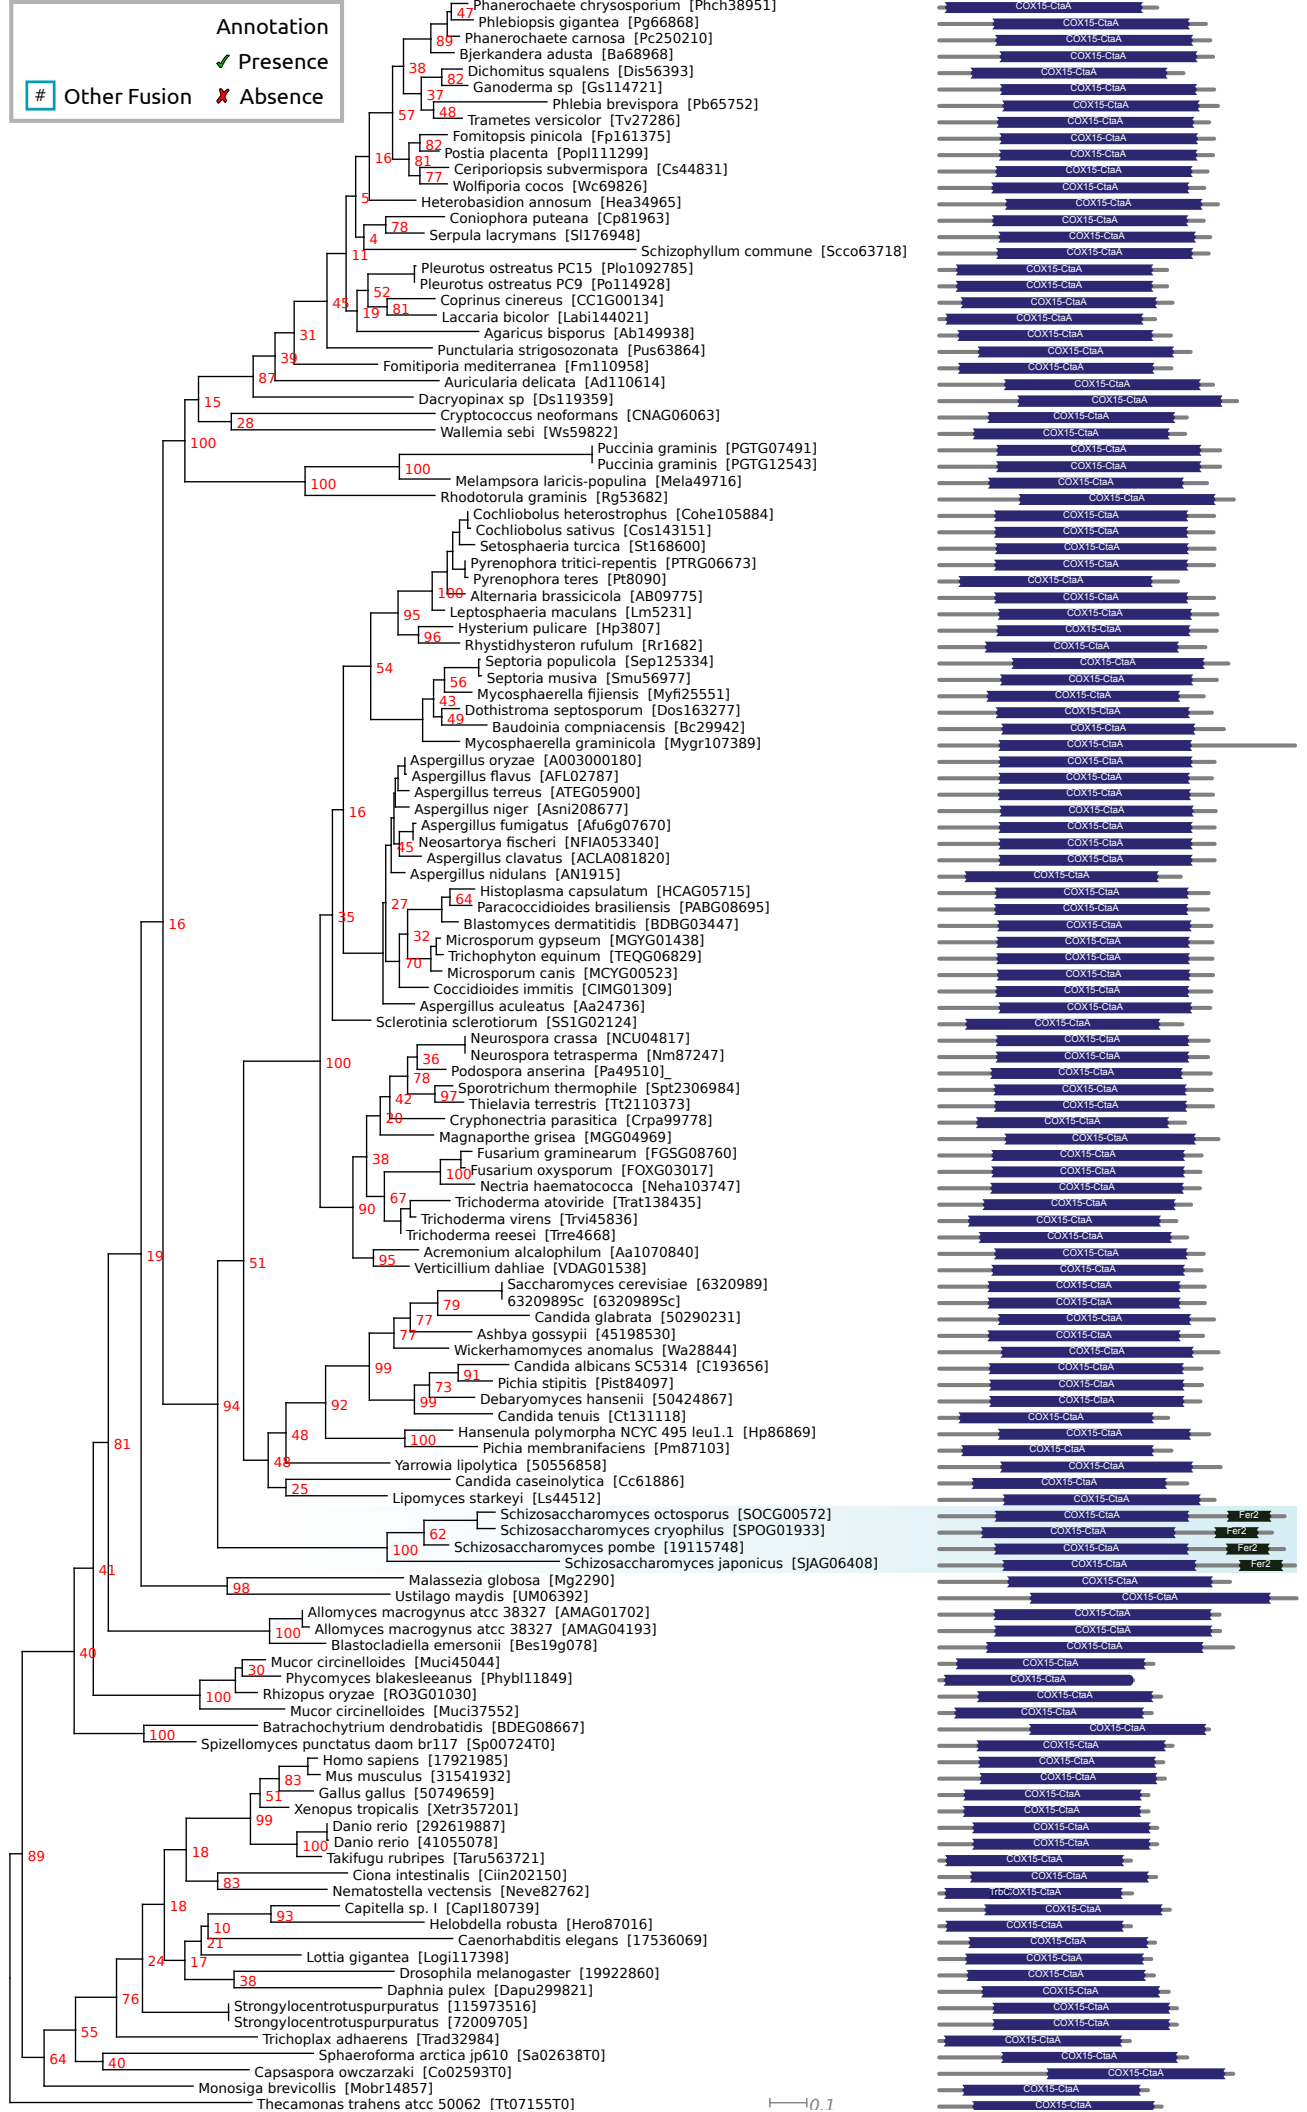



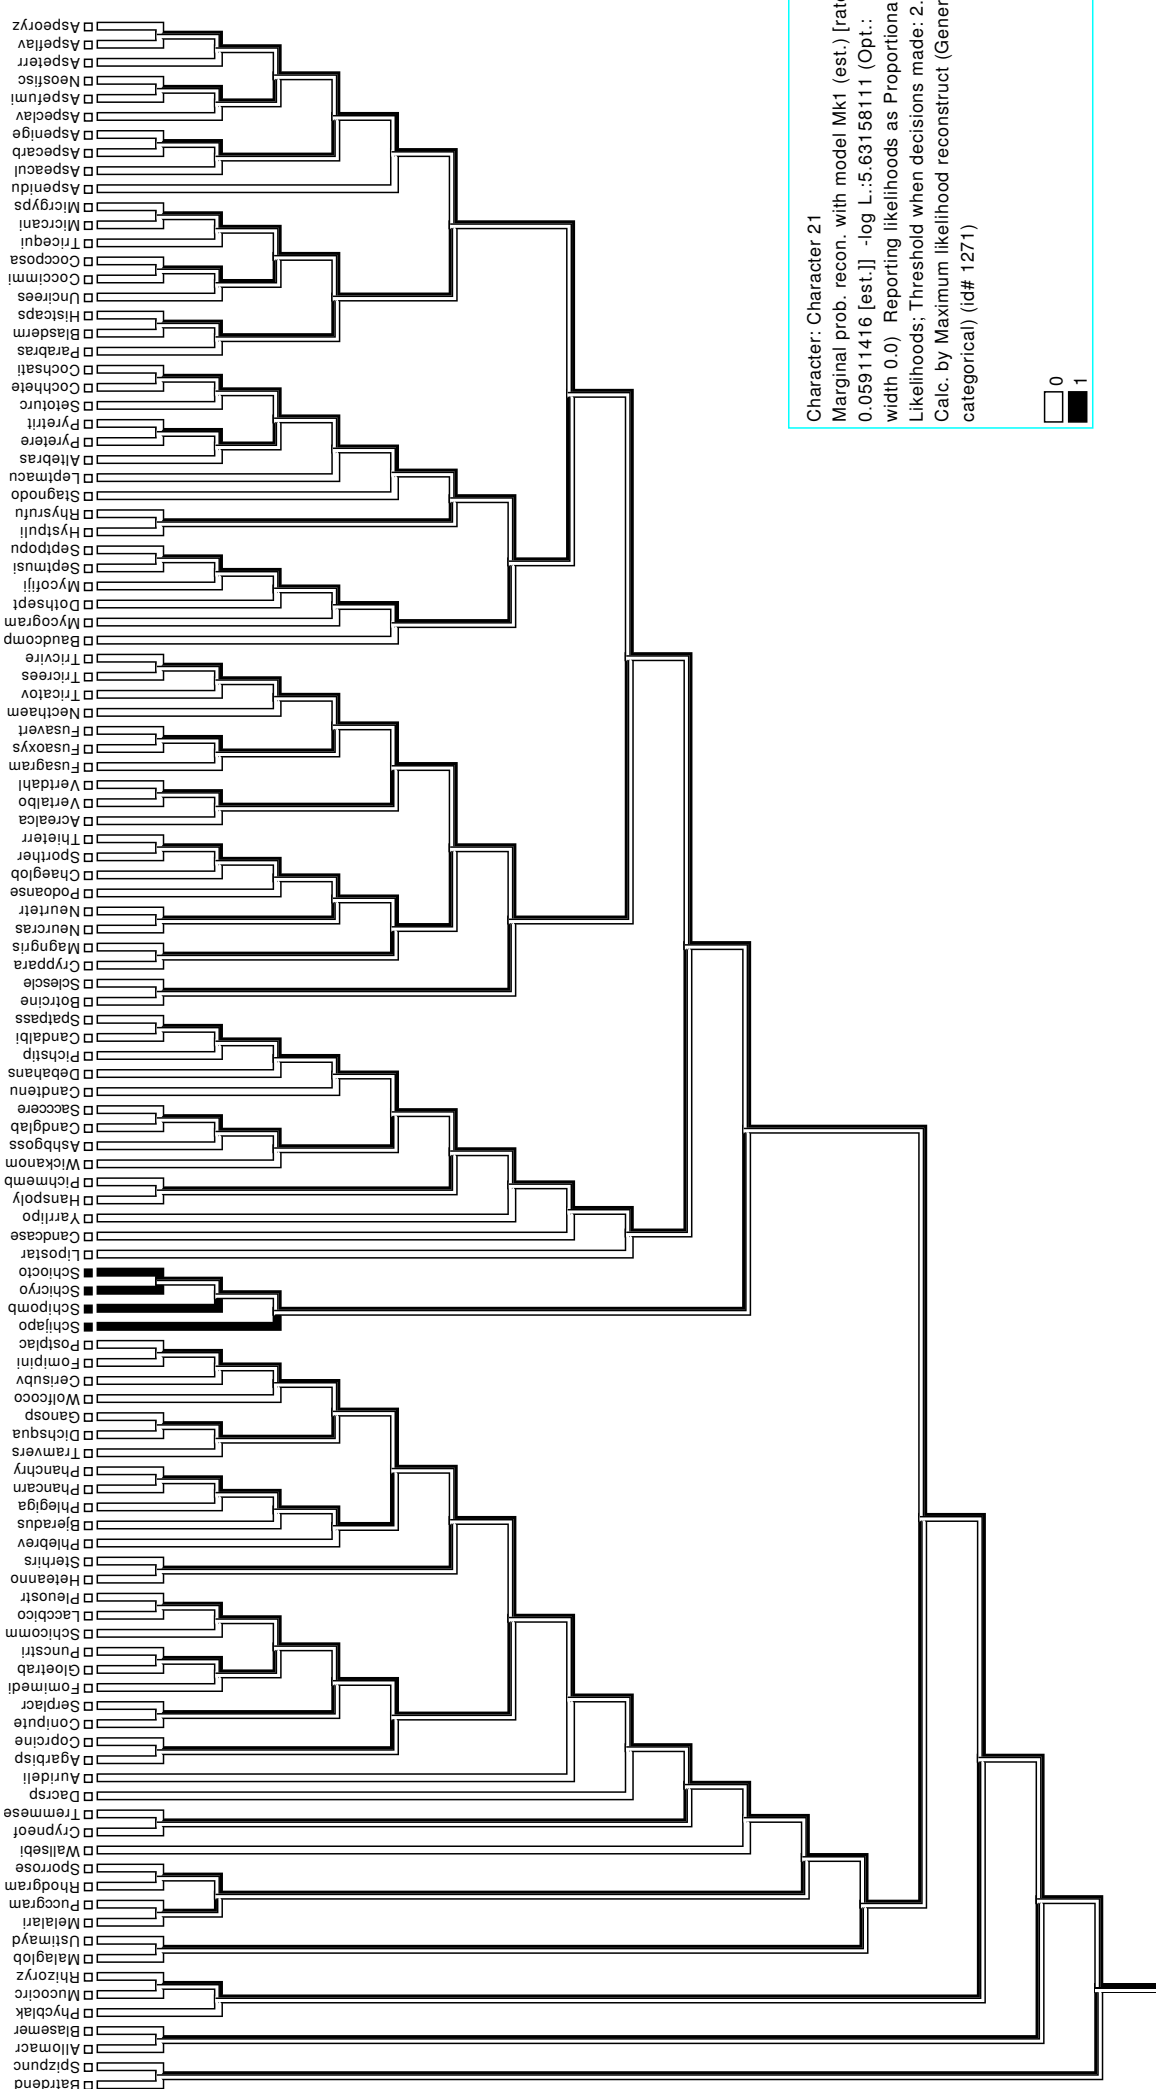

Character: Character 21  
 Marginal prob. recon. with model Mk1 (est.) [rate  
 0.05911416 [est.]] -log L.:5.63158111 (Opt.:  
 width 0.0) Reporting likelihoods as Proportional  
 Likelihoods; Threshold when decisions made: 2.0  
 Calc. by Maximum likelihood reconstruct (Generic  
 categorical) (idf: 1271)

0  
 1

# Putative Fusion 22

September 26, 2012

## 1 Fasta Sequences

These are the unfused sequences identified by fdfBLAST belonging to the putative gene fusion in FASTA format. Accessions may be shortened, but belong to either the taxons individual genome project or NCBI's accession numbering.

```
>lcl|AMAG_05362 unnamed protein product
MTRTIHLLLLAALVLAAPRPSHGASIGAVILDQQQADEQVAWPARRDKTPLPVVLWHGMGDSCCGQGMSDIKAALHEHV
PGVVFVHSIRVGRDANEDTMRGFLDDVNVQTKQVCAKLSMEKLRGFFHFIGFSQGGLFARSLVERCEGLKVETLITFAAP
HQGIKDVPEWCDSQPVFCSMARMTIRYGAYSPLVQGGKVVQAAYIKTPWNHNAYLRGNRFLPDINNENNVNKAYKERMTT
LKALVLRHEDDTVLSLRDSAWFYEDLMSGPVPFNETALYKDDVIGLRKLHKKGKVAFTLPGDHMQFSIASFLAVVLPY
LRDASTAVMHANEHVDVAVAVRLHARQLAHTNPAWLDRVPFARSTL
>lcl|AMAG_11801 unnamed protein product
MDQPVALAAPRGS LAAMCAAHPDPAALTSLSLTHVMYHVDDALIGKALALITLLPLAMVVS YATLAAAARPREPLWLAMF
LGQLGNEGLNFVLKRWIAEHRPTPFLGKGYGMPSSHAQFMSYWCIFVLLLVAERRRLPSWLGPLIQLAALAI AALVIYS
RVHLQYHTVAQVLAGTAIGTVVGAVWFALVHPRFPLPSRPRPAEQHAKQE
```

## 2 Annotated Phylograms

All trees were generated from an initial run of Darren's Orchard pipeline against 139 taxa (Table S1), using the above corresponding un-fused sequences as BLAST seeds. The alignments were then checked for any missing taxa, manually masked and then ProtTest3 was run, please see the Methods section for detail. The final trees were generated by the following command:

```
phym1 -i alignment_file -d aa -b 100 -m model -c 8 -v invariant_sites -s BEST --quiet
-a gamma
```

Styling and annotation was made possible by Dendroscope and Inkscape.

## 3 Mesquite Cladogram

This tree is the 68-gene concatenated phylogeny (Fig. 1), with the presence of a fusion (black), presence of a fission (white), and absent/undetermined (grey) status of gene fusion characters plotted on to it using a "1/0/-" nexus-style data matrix. We used the program 'Mesquite' to calculate proportional likelihoods based on either an "Mk1" or "Assym. 2 param model." (see Table S4) of character change across the fungal phylogeny (Fig. 1). This allowed for a proportional likelihood of the position of the fusion/fission to be calculated.





**Annotation**

✓ Presence

✗ Absence

**#** Other Fusion

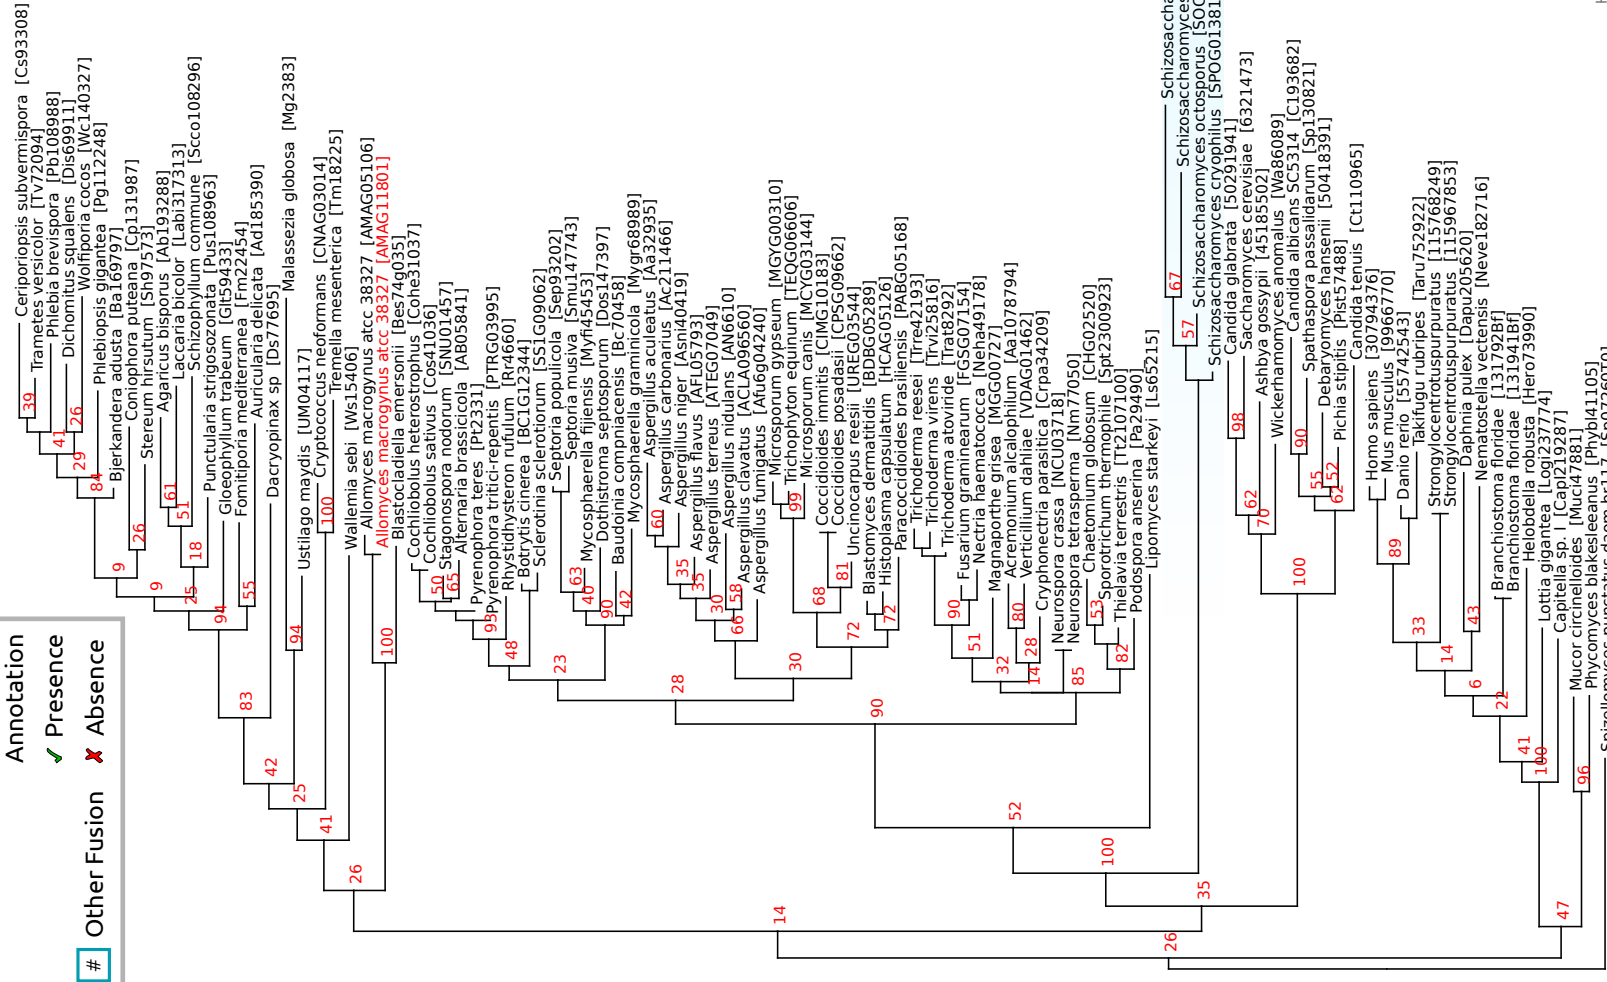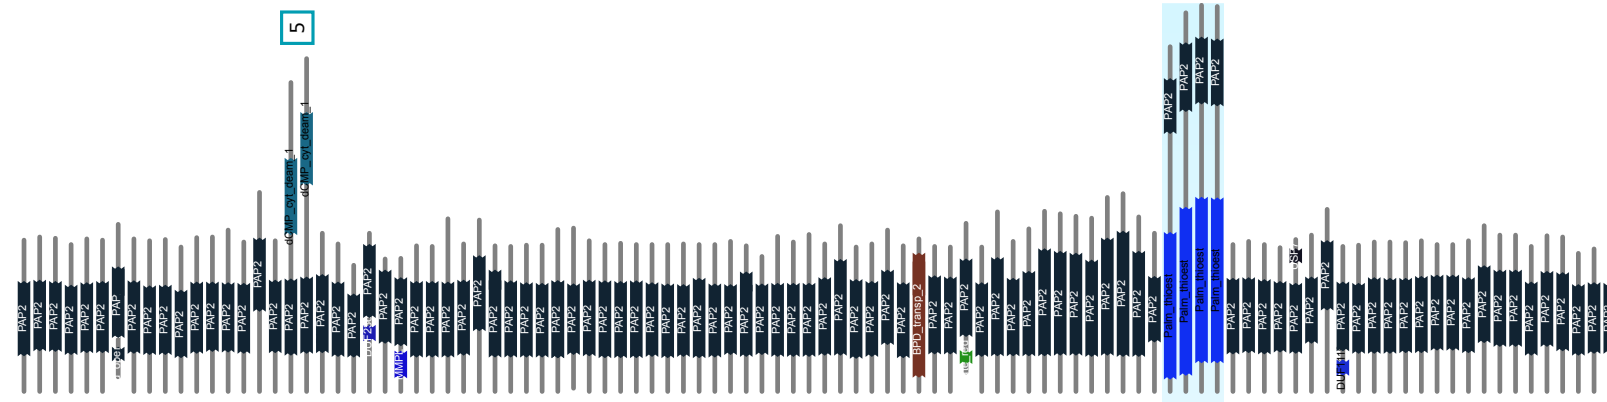



# Putative Fusion 23

September 26, 2012

## 1 Fasta Sequences

These are the unfused sequences identified by fdfBLAST belonging to the putative gene fusion in FASTA format. Accessions may be shortened, but belong to either the taxons individual genome project or NCBI's accession numbering.

```
>lcl|6322261Sc unnamed protein product
MLSSANRFYIKRHLATHANMFPSVSKNFQTKVPPYAKLLTNLDKIKQITNNAPLTLAEKILYSHLCDPEESITSSDLSTI
RGNKYLKLNPDVAMQDASAMALLQFMTTGLNQTSPASIHCDHLIVGKDGETKDLPSIATNQEVDFLESCAKRYGI
QFWGPGSGIIHQIVLENFSAPGLMMLGTDSTPNAGGLGAIAGVGGADAVDALTGTPWELKAPKILGVKLTGKLNWST
PKDVITKLAGLLTVRGGTGYIVEYFEGEVSTLSCTGMATICNMGAEIGATTSTFPYQEAHKRYLQATNRAEVAEAADVAL
NKFNFLRADKDAQYDKVIEIDLSAIEPHVNGPFTPDLSTPISQYAEKSLKENWPKVSAAGLIGSCTNSSYQDMSRVDLV
KQASKAGLKPRIPFFVTPGSEQIRATLERDGIIDIFQENGAKVLNACGPCIGQWNREDVSKTSETNTIFTSFNRNFRA
RNDGNRNTMNFLLTSPEIVTAMSYSGDAQFNPLTDSIKLPNGKDFKFPKGDDELPKRGFEHGRDKFYPEMDPKPDSNVEI
KVDPNSDRLQLLEPFKPNWNGKELKTNVLLKVEGKCTTDHISAAGVWLKYKGHLENISYNTLIGAQNKETGEVNKAYDLDG
TEYDIPGLMMKWKSDGRPWTVIAEHNYGEGSAREHAALS PRFLGGEILLVKSFARIHETNLKKGVLPLTFANESDYDKI
SSGDVLETLNLVDMIAKDGNGGEIDVKITKPNGESFTIKAKHTMSKDQIDFFKAGSAINYIGNIRNE
>lcl|37362666Sc unnamed protein product
MLQLKFIWPVARITPIYRPFTSHPFRLATSSSISSTKAKTTKTDTTPLKLSNELYAIKIHNRPYLVTEGDRVILPFKL
KQAEVGDILNMTDVTTLGSRNYKLVGHPINTSLYTLKATVVVGKTKRAFQTREVTKRRNRVRHAKSKGDLTILRISELSM
N
```

## 2 Annotated Phylograms

All trees were generated from an initial run of Darren's Orchard pipeline against 139 taxa (Table S1), using the above corresponding un-fused sequences as BLAST seeds. The alignments were then checked for any missing taxa, manually masked and then ProtTest3 was run, please see the Methods section for detail. The final trees were generated by the following command:

```
phyml -i alignment_file -d aa -b 100 -m model -c 8 -v invariant_sites -s BEST --quiet
-a gamma
```

Styling and annotation was made possible by Dendroscope and Inkscape.

## 3 Mesquite Cladogram

This tree is the 68-gene concatenated phylogeny (Fig. 1), with the presence of a fusion (black), presence of a fission (white), and absent/undetermined (grey) status of gene fusion characters plotted on to it using a "1/0/-" nexus-style data matrix. We used the program 'Mesquite' to calculate proportional likelihoods based on either an "Mk1" or "Assym. 2 param model." (see Table S4) of character change across the fungal phylogeny (Fig. 1). This allowed for a proportional likelihood of the position of the fusion/fission to be calculated.

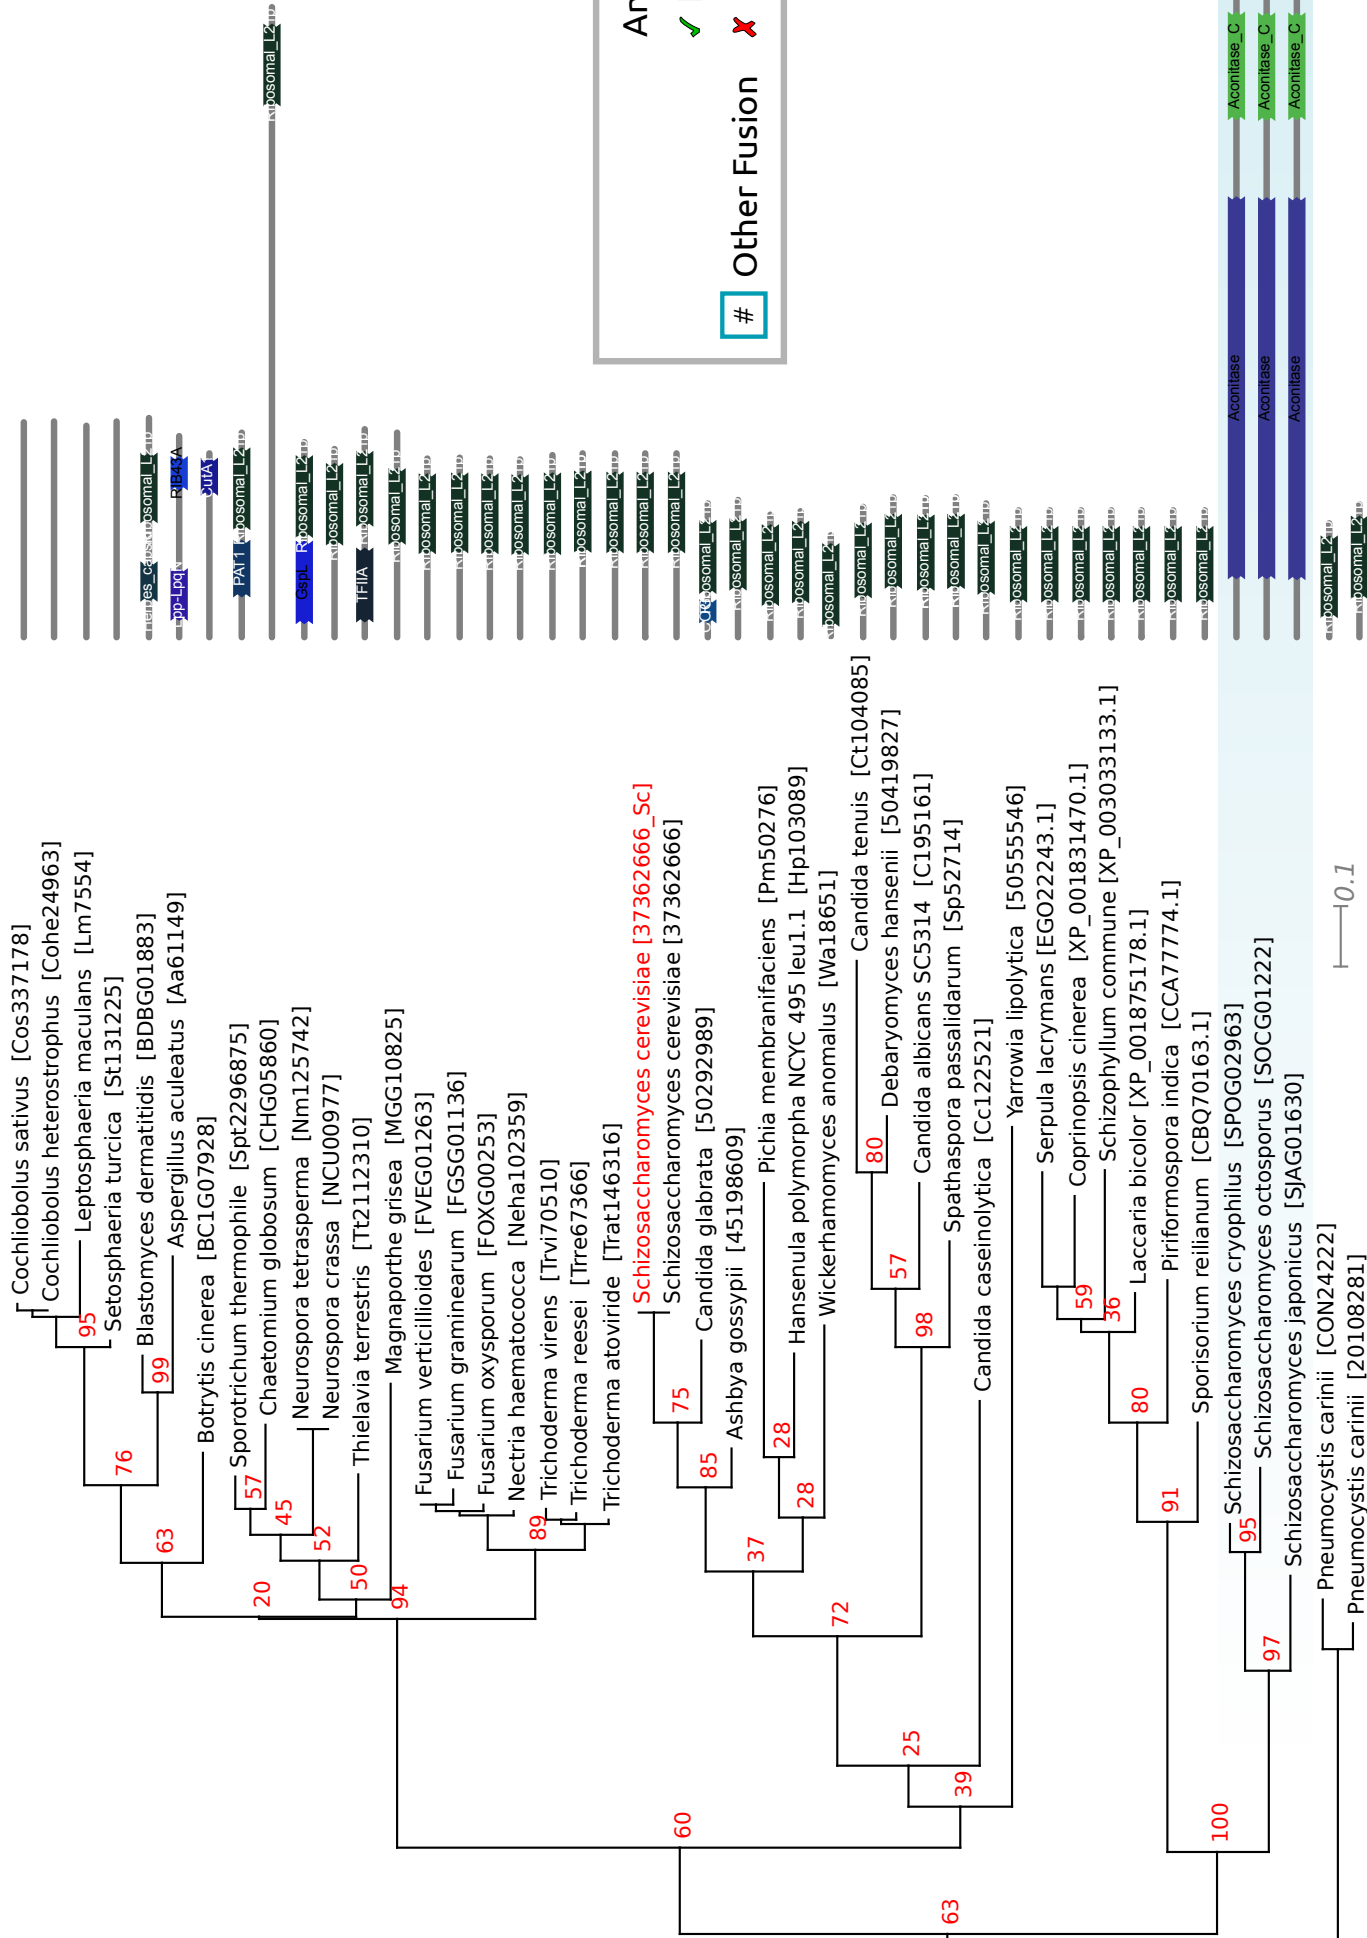

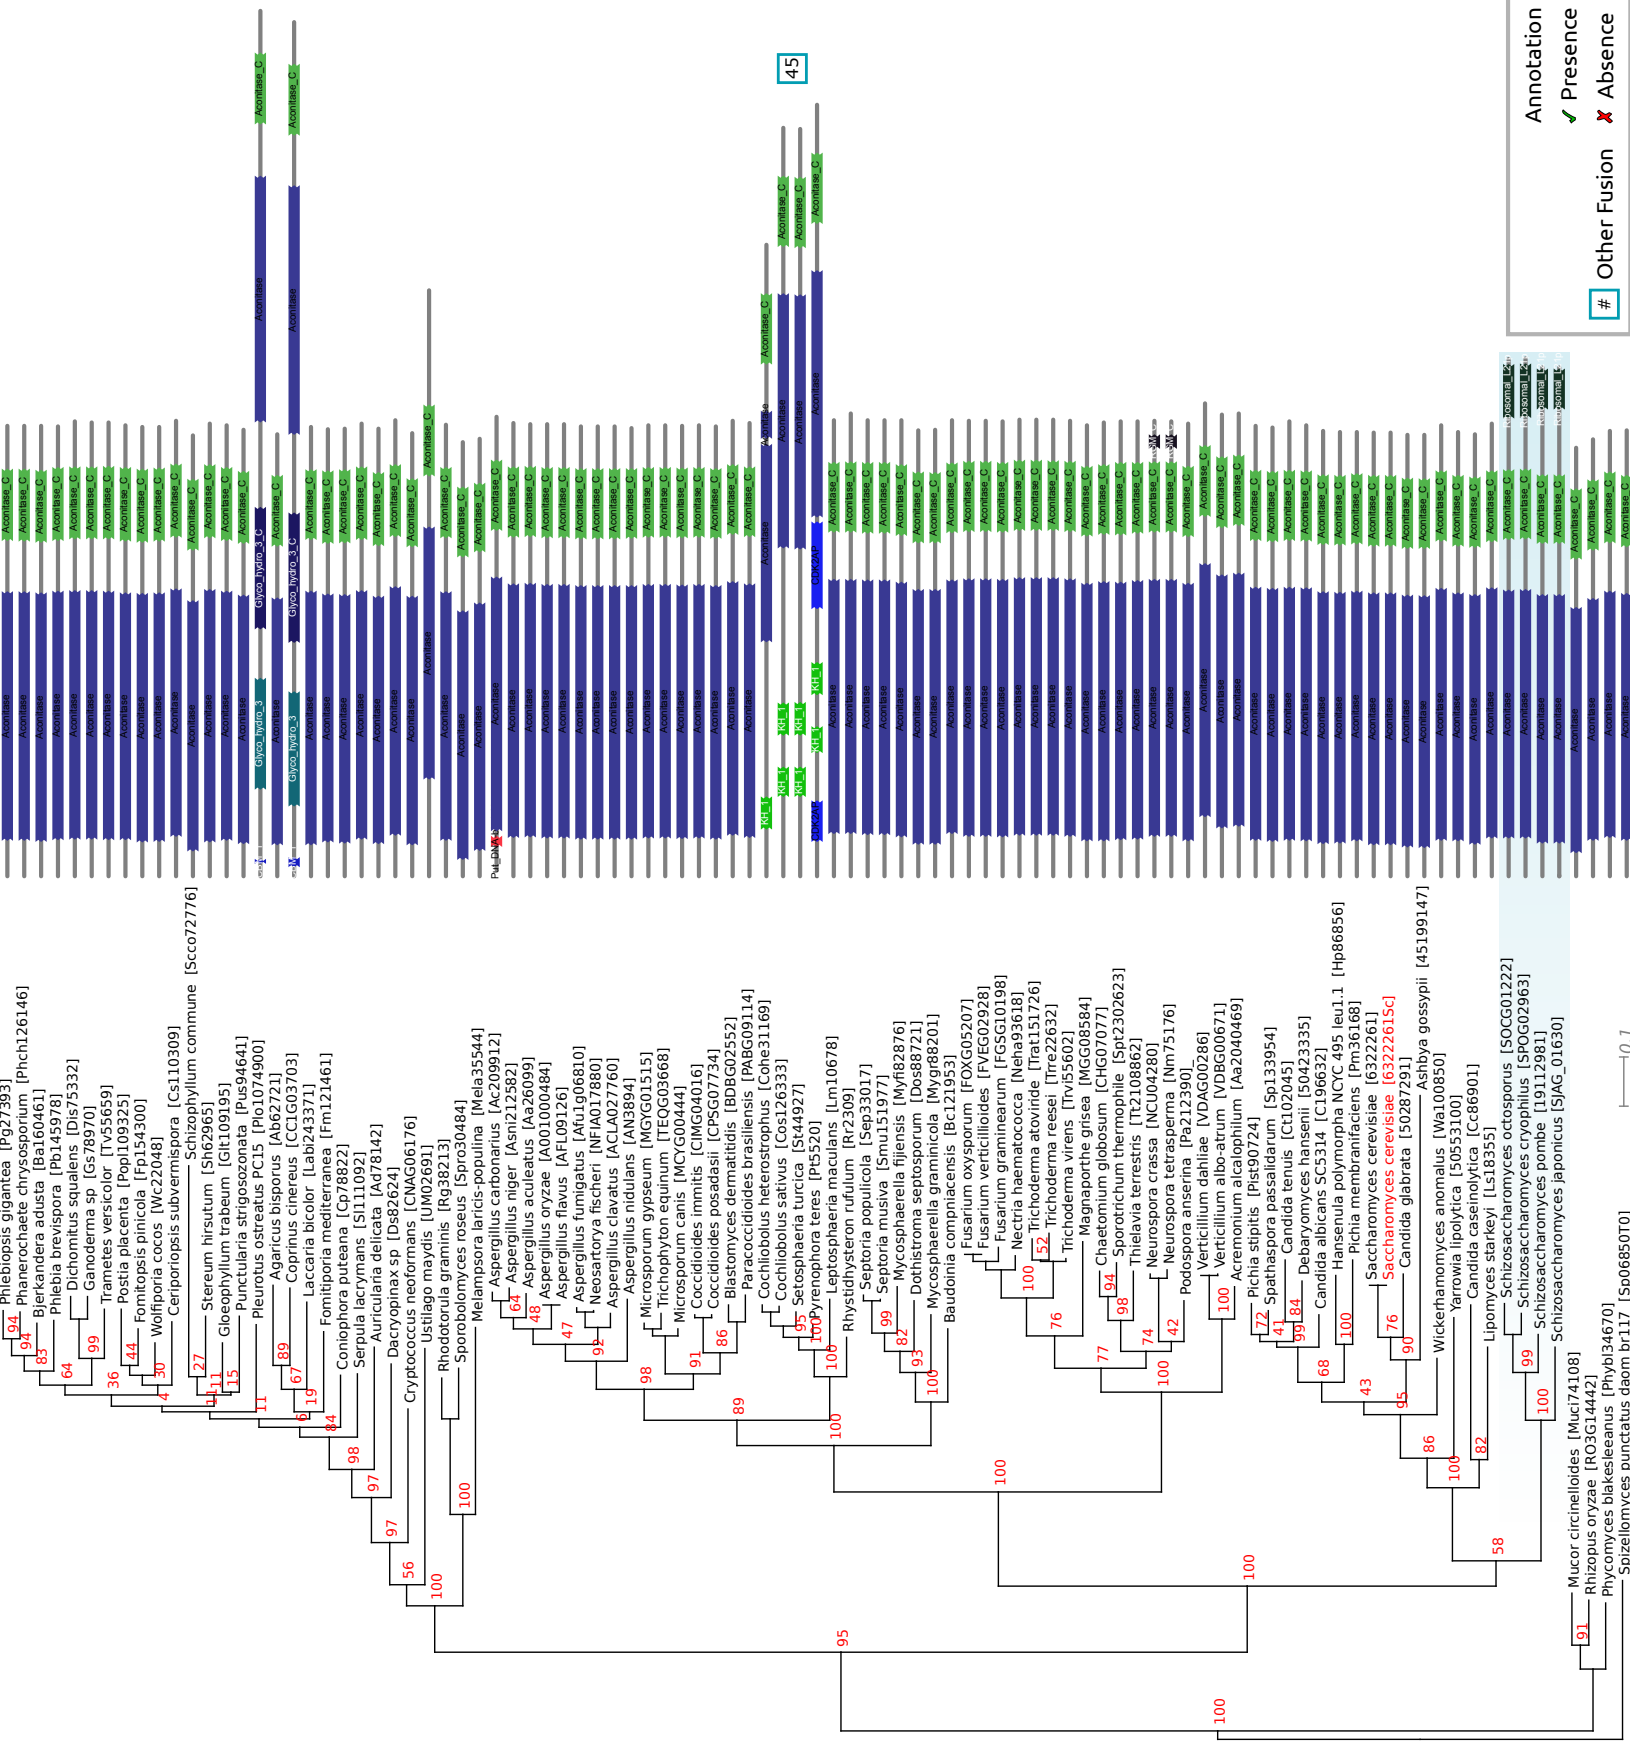

Annotation

✓ Presence

✗ Absence

# Other Fusion

45

10





# Putative Fusion 24

September 26, 2012

## 1 Fasta Sequences

These are the unfused sequences identified by fdfBLAST belonging to the putative gene fusion in FASTA format. Accessions may be shortened, but belong to either the taxons individual genome project or NCBI's accession numbering.

```
>lcl|CC1G05752 unnamed protein product
MTTQMATKRQEHADIFLIYTDLQGVHASPEDGNRYRGLGYIDSTKDVLEIALELLPEDPPKEPTSTEWPSAMNVECEAPK
SKQRRRRTRPTATSAQNKGPKEVEIELLQDITSLRSRKGDTGSVVKASIDFARYVLRHRFPSEQSLFNRYERLKECHVL
ELGSGTGILSILLSPLVAKYTVTDIEALVPLIQKNINKNFPSDTSRPNISAEPDWIALHSSTPAQRAKLFSDPPVDLI
LVVDCIYHPSLIPPLSTIDHVTIPDRTTVLVLSLRSEEVLREFLLSWLDIPGWKIWHVGGDLLQNKRYVMWTGWKPST
KGRES
>lcl|CC1G04209 unnamed protein product
MAPHDDHIVYMKMALEEAEKAVPVPGAFCVGCVLVARLLHKSVVLSTGYSRELPGNTHAEANALAKVAEISPKESWALSE
SYEASSDLKILECTDVYTTLEPCSIRTSGLSPCADALIKAKVRRRCIIGVNEPPDFVKCEGADRLKAAGIEVIWLSGMEE
DCLRVARKGH
```

## 2 Annotated Phylograms

All trees were generated from an initial run of Darren's Orchard pipeline against 139 taxa (Table S1), using the above corresponding un-fused sequences as BLAST seeds. The alignments were then checked for any missing taxa, manually masked and then ProtTest3 was run, please see the Methods section for detail. The final trees were generated by the following command:

```
phym1 -i alignment_file -d aa -b 100 -m model -c 8 -v invariant_sites -s BEST --quiet
-a gamma
```

Styling and annotation was made possible by Dendroscope and Inkscape.

## 3 Mesquite Cladogram

This tree is the 68-gene concatenated phylogeny (Fig. 1), with the presence of a fusion (black), presence of a fission (white), and absent/undetermined (grey) status of gene fusion characters plotted on to it using a "1/0/-" nexus-style data matrix. We used the program 'Mesquite' to calculate proportional likelihoods based on either an "Mk1" or "Assym. 2 param model." (see Table S4) of character change across the fungal phylogeny (Fig. 1). This allowed for a proportional likelihood of the position of the fusion/fission to be calculated.

Annotation

✓ Presence

✗ Absence

# Other Fusion

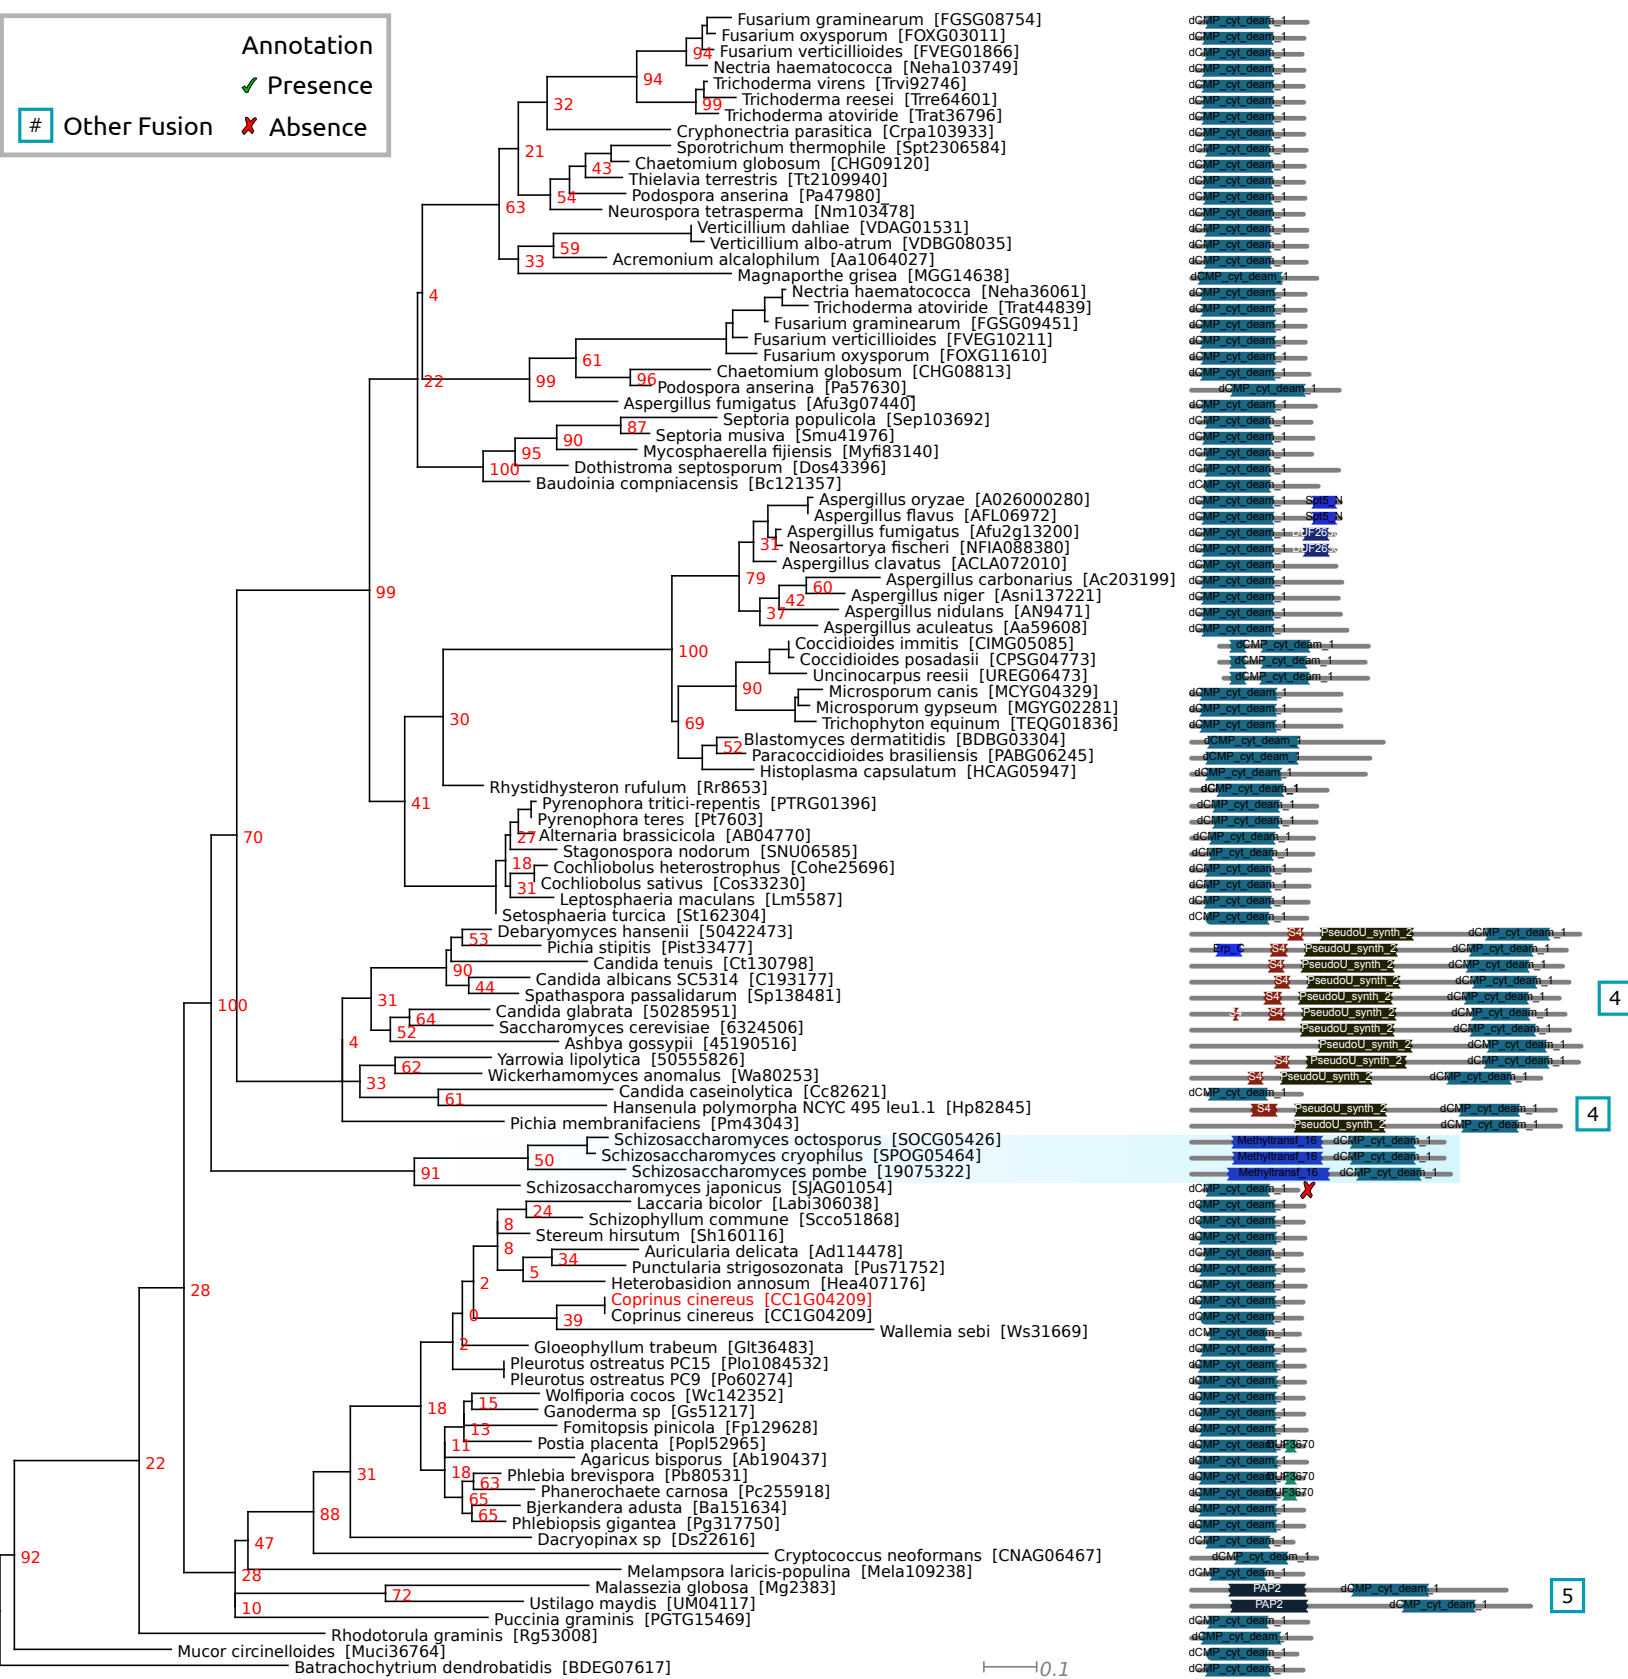

4

4

5





# Putative Fusion 25

September 26, 2012

## 1 Fasta Sequences

These are the unfused sequences identified by fdfBLAST belonging to the putative gene fusion in FASTA format. Accessions may be shortened, but belong to either the taxons individual genome project or NCBI's accession numbering.

```
>lcl|6324854Sc unnamed protein product
MSEKKKVLMLHGFVQSDKIFSAKTGGLRKNLKKLGYDLYYPCAPHSIDKKALFQSESEKGRDAAKEFNSTATSDEVYGVWF
FRNPESFNSFQIDQKVFNYLRNYVLENGPFDGVIQFSQAGLGGYLVTDNFNRLNLTDEQQPALKFFISFSGFKLEDQSY
QKEYHRRIQVPSLHVRGELDEVVAESRIMALYESWPDNKRTLLVHPGAHFVPNSKPFVSQVCNWIQGITSKEGQEHNAPQ
EVDKQFQDKPQLEDDLLDMIDSLGKL
>lcl|6324810Sc unnamed protein product
MAGGKIPIVGIVACLQPEMGIGFRGGLPWRLPSEMKYFRQVTSLTKDPNKKNALIMGRKTWESIPPKFRPLPNRMNVIIS
RSFKDDFVHDKERSIVQSNLANAIMNLESNFKEHLERIYVIGGGEVYSQIFSITDHWLITKINPLDKNATPAMDTFLDA
KKLEEVFSEQDPAQLKEFLPPKVELPETDCDQRYSLKGYCFEFTLYNRK
```

## 2 Annotated Phylograms

All trees were generated from an initial run of Darren's Orchard pipeline against 139 taxa (Table S1), using the above corresponding un-fused sequences as BLAST seeds. The alignments were then checked for any missing taxa, manually masked and then ProtTest3 was run, please see the Methods section for detail. The final trees were generated by the following command:

```
phym1 -i alignment_file -d aa -b 100 -m model -c 8 -v invariant_sites -s BEST --quiet
-a gamma
```

Styling and annotation was made possible by Dendroscope and Inkscape.

## 3 Mesquite Cladogram

This tree is the 68-gene concatenated phylogeny (Fig. 1), with the presence of a fusion (black), presence of a fission (white), and absent/undetermined (grey) status of gene fusion characters plotted on to it using a "1/0/-" nexus-style data matrix. We used the program 'Mesquite' to calculate proportional likelihoods based on either an "Mk1" or "Assym. 2 param model." (see Table S4) of character change across the fungal phylogeny (Fig. 1). This allowed for a proportional likelihood of the position of the fusion/fission to be calculated.

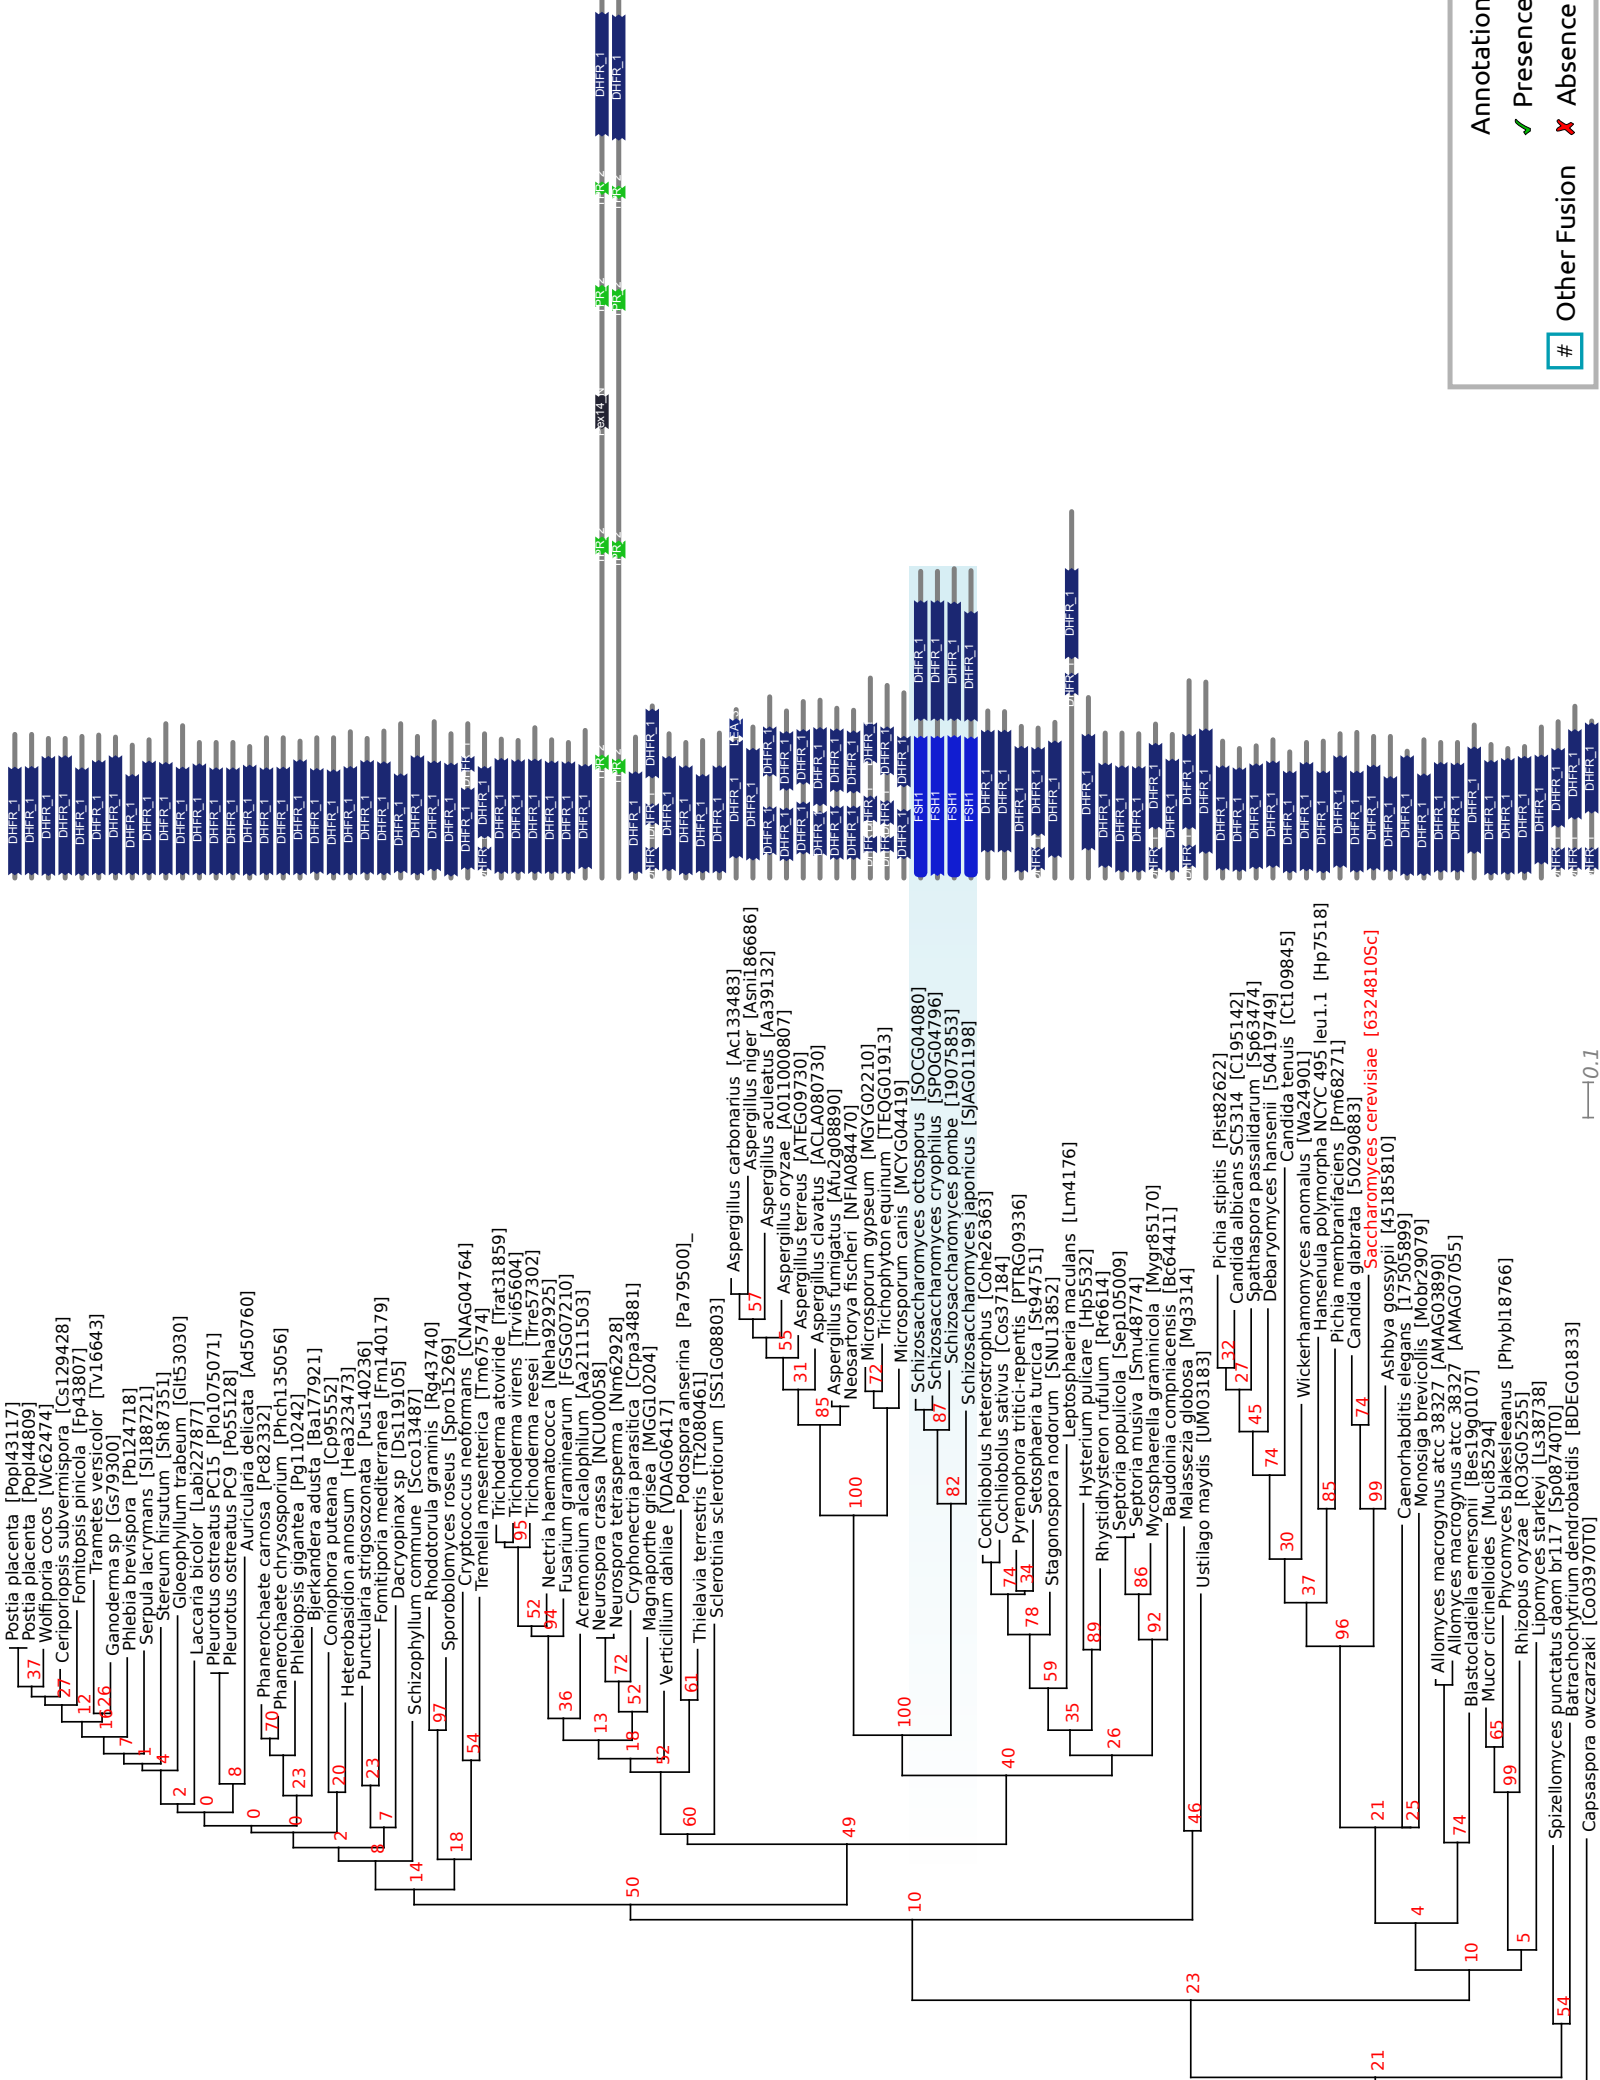

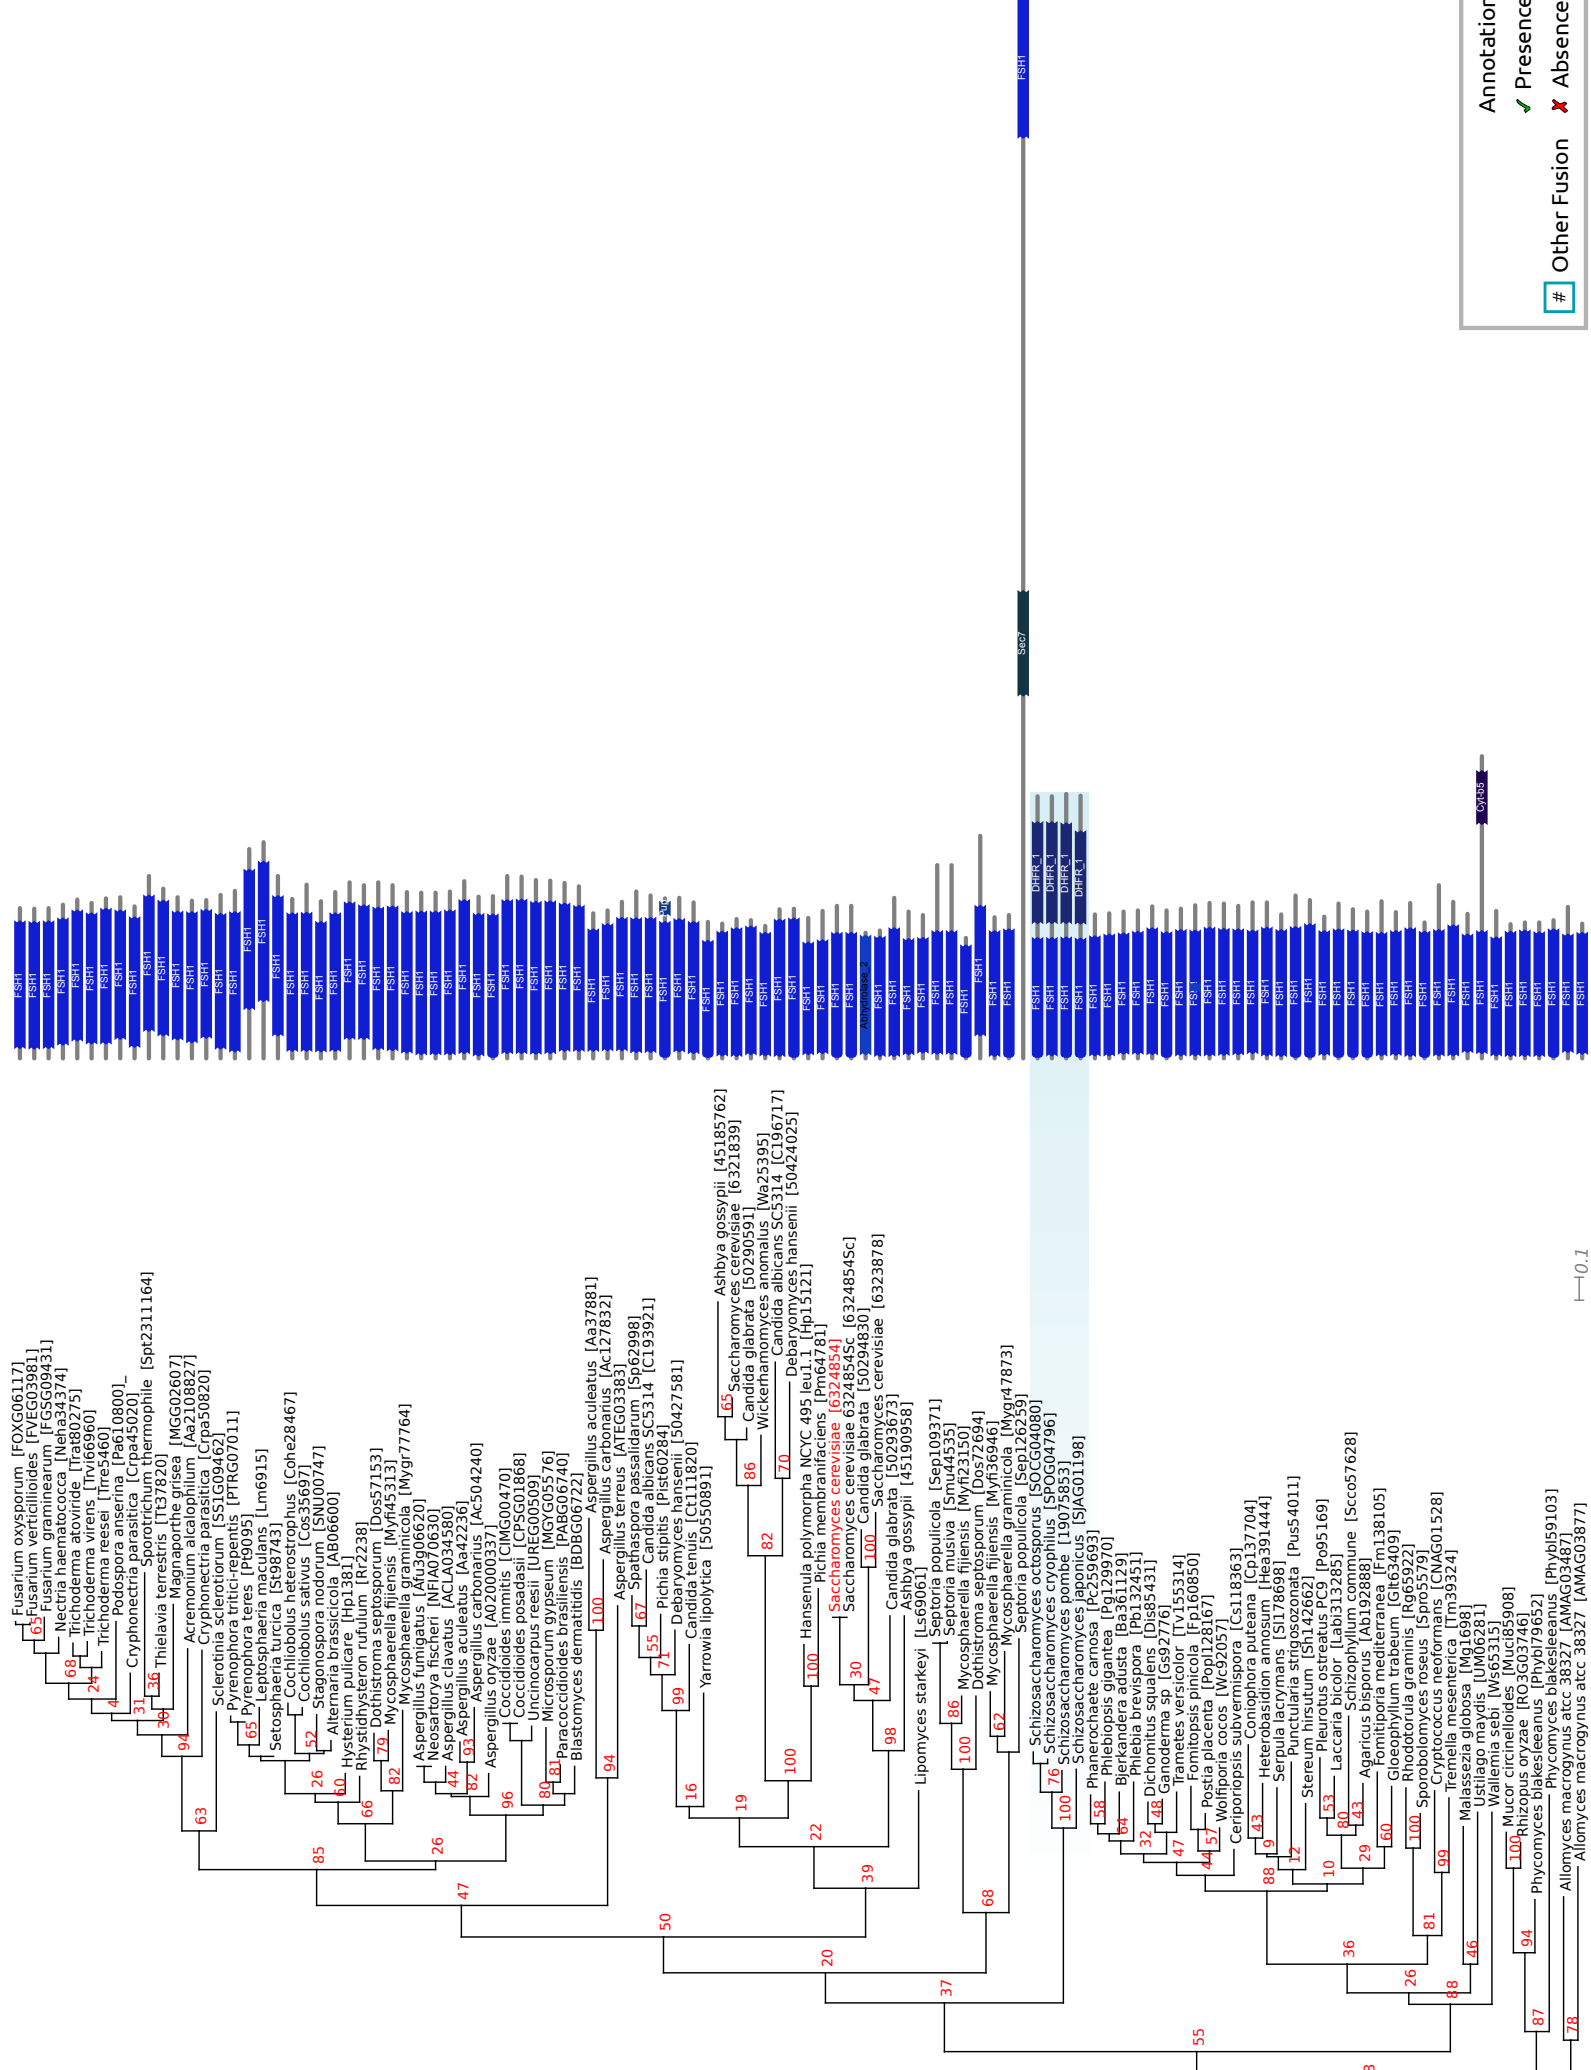

Annotation

- ✓ Presence
- ✗ Absence
- # Other Fusion



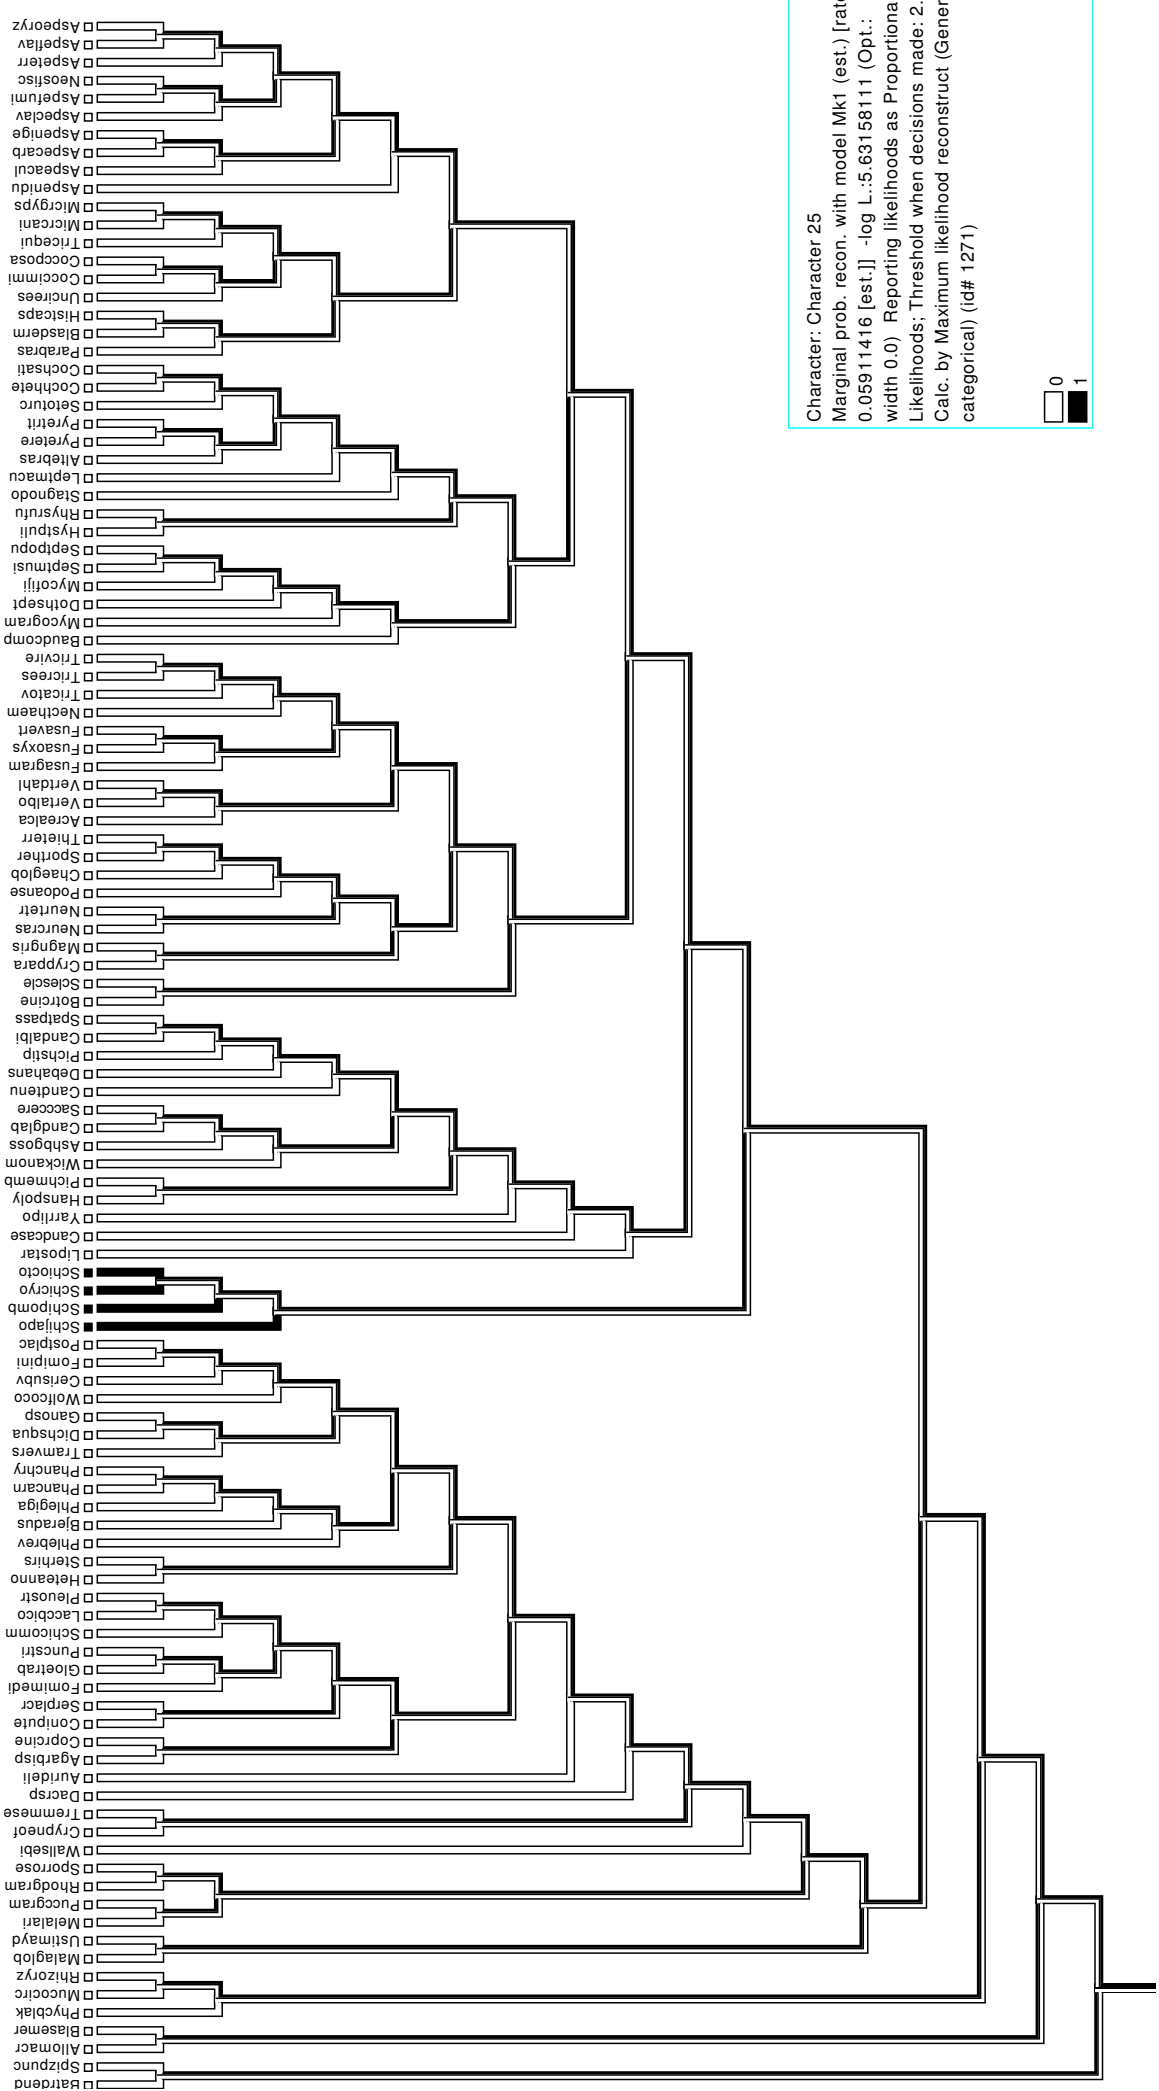

Character: Character 25  
 Marginal prob. recon. with model Mk1 (est.) [rate  
 0.05911416 [est.]] -log L.:5.63158111 (Opt.:  
 width 0.0) Reporting likelihoods as Proportional  
 Likelihoods; Threshold when decisions made: 2.0  
 Calc. by Maximum likelihood reconstruct (Generic  
 categorical) (idf: 1271)

0  
 1

# Putative Fusion 26

September 26, 2012

## 1 Fasta Sequences

These are the unfused sequences identified by fdfBLAST belonging to the putative gene fusion in FASTA format. Accessions may be shortened, but belong to either the taxons individual genome project or NCBI's accession numbering.

```
>lcl|Mc151744 unnamed protein product
MGFPSWASVIVALGAATVLAIAAGDFIYSKLRVPPFKAAGKHCFITGGSTGLGKSLAVQLVKEGADVVCIVARRVSELEAAV
EEIKASCLNENQKVIIYISADVTNQKDVVRAFDEAKVKMGRNPDFVCACAGASYPKFFLDHTMEDFEKLTTLNLYLGQAYVA
HQAQRMRDSNIKDGKIVFVSSLLGMISFAGWATYSPTKYAVRGLADTLRNELKRYNIGVHIFPPGGIESPGFETENLTK
PEVTKIIEGANTPQTGAECAKSLMKGLHQGQYMIIVTDALSEVLRCVVRGVGPTNNLVLDYILAAIGQPLGSAFALYADYV
VKSAYDK
>lcl|Mc112741 unnamed protein product
MKPFGTELVIGLLAIGLNYGATFKLPATSLKDPVQTLSTTVPVLFVGHILLVLFVFAHILRGTTNKALKSVGYSILATATA
TGVLHVLTVLFVGFAPLIEKIPNTFLFAAYLSILTMPCYESFQETAWIKVFLQHSPTTTSEIYAYAQAICALSGAWIGAIIV
LPLDWDREWQAWPISCVISTYVGHVSVGLAFAFVWASLKLMMFGKKKSE
```

## 2 Annotated Phylograms

All trees were generated from an initial run of Darren's Orchard pipeline against 139 taxa (Table S1), using the above corresponding un-fused sequences as BLAST seeds. The alignments were then checked for any missing taxa, manually masked and then ProtTest3 was run, please see the Methods section for detail. The final trees were generated by the following command:

```
phym1 -i alignment_file -d aa -b 100 -m model -c 8 -v invariant_sites -s BEST --quiet
-a gamma
```

Styling and annotation was made possible by Dendroscope and Inkscape.

## 3 Mesquite Cladogram

This tree is the 68-gene concatenated phylogeny (Fig. 1), with the presence of a fusion (black), presence of a fission (white), and absent/undetermined (grey) status of gene fusion characters plotted on to it using a "1/0/-" nexus-style data matrix. We used the program 'Mesquite' to calculate proportional likelihoods based on either an "Mk1" or "Assym. 2 param model." (see Table S4) of character change across the fungal phylogeny (Fig. 1). This allowed for a proportional likelihood of the position of the fusion/fission to be calculated.

**Annotation**  
 ✓ Presence  
 ✗ Absence  
 # Other Fusion

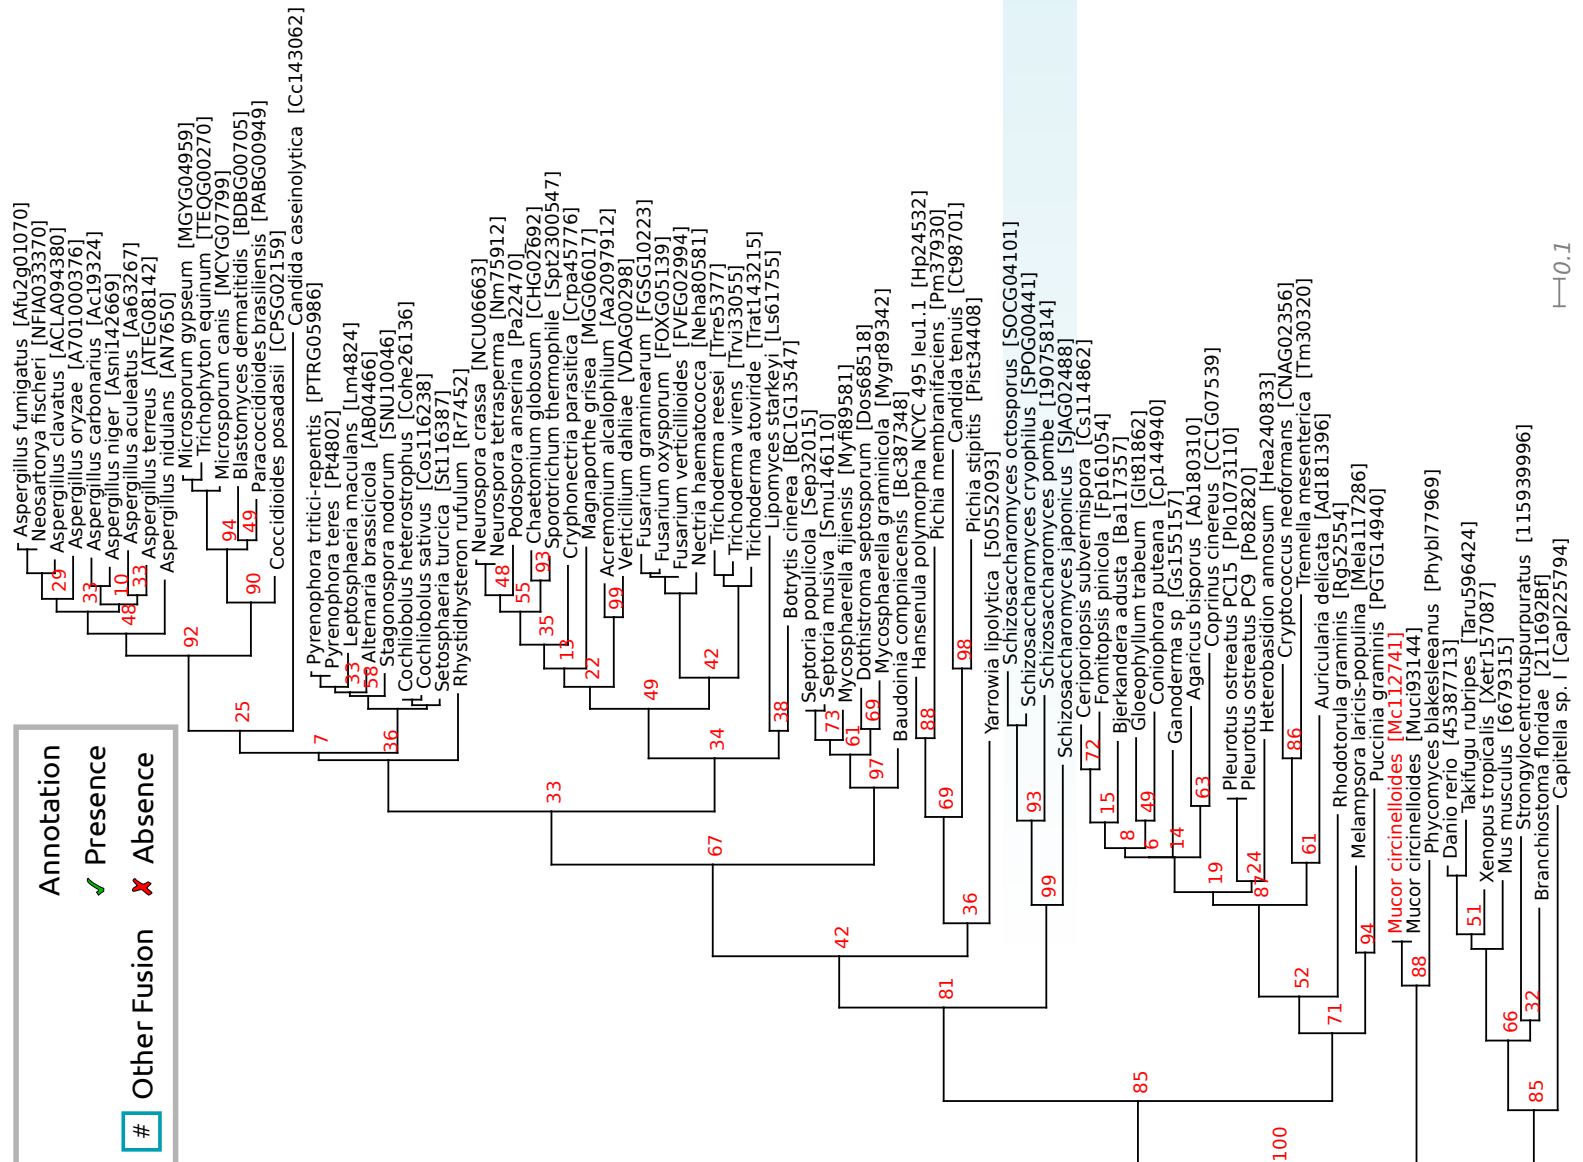

Annotation

✓ Presence

✗ Absence

# Other Fusion

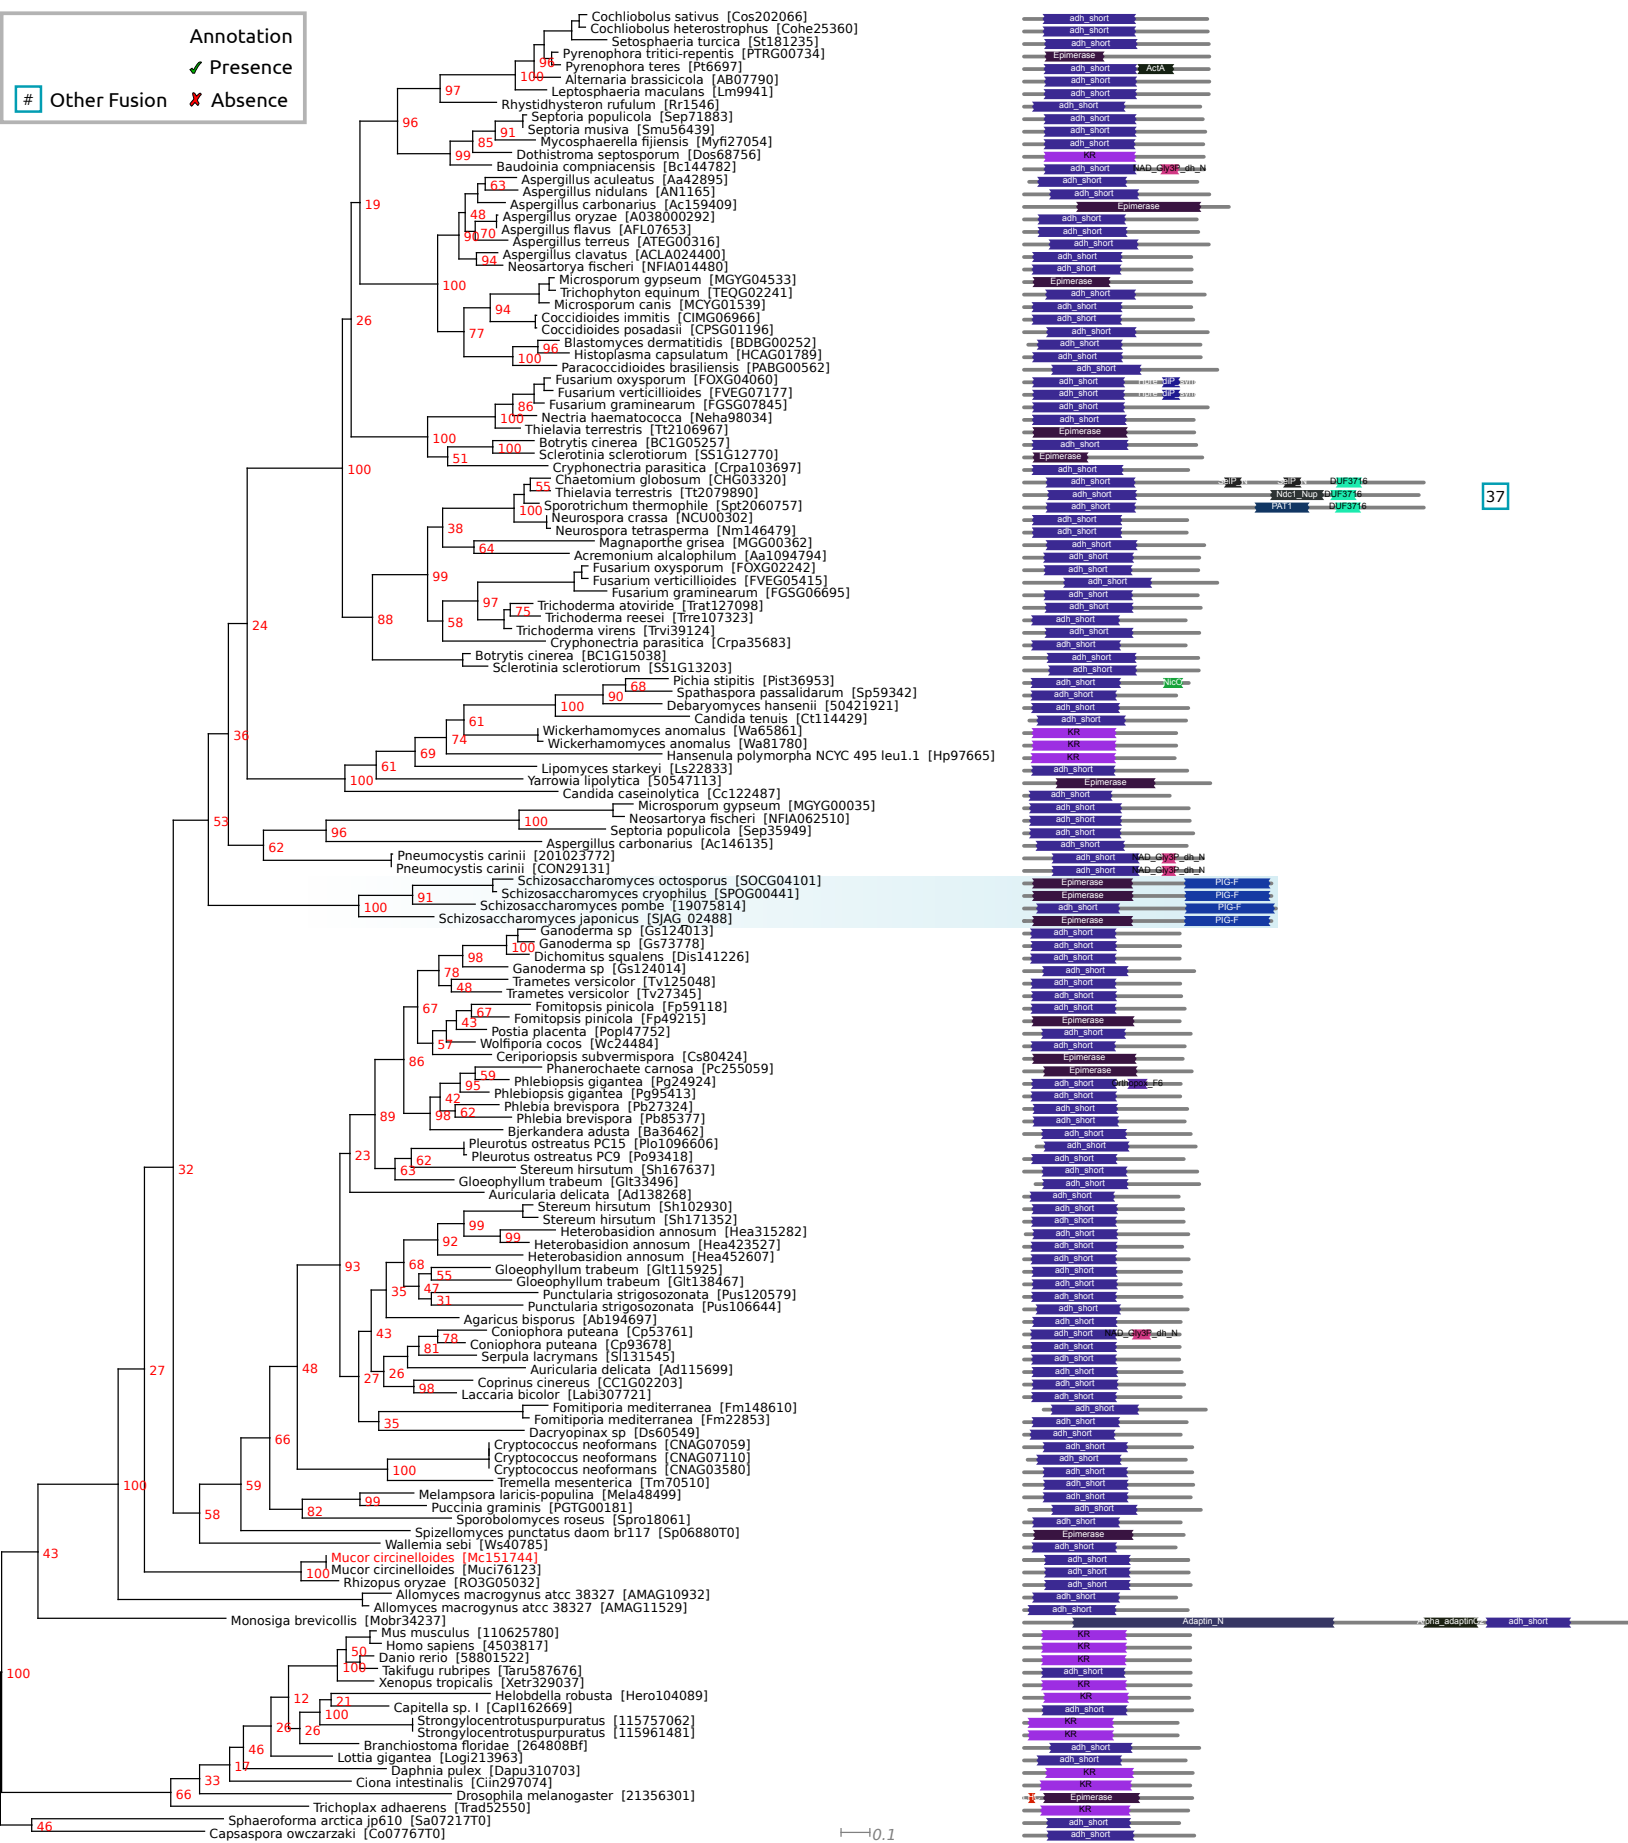

37

0.1



# Putative Fusion 27

September 26, 2012

## 1 Fasta Sequences

These are the unfused sequences identified by fdfBLAST belonging to the putative gene fusion in FASTA format. Accessions may be shortened, but belong to either the taxons individual genome project or NCBI's accession numbering.

```
>lcl|6324283Sc unnamed protein product
MFLLPFVIRHSSSIYLP TLRFRGLLTVISRN IHISTPHKMLPLSIEQR RPSRSPEYDQSTLSNYKDFAVLHTDLNLSVSF
EKSAISGSVTFQLKKLHEGKNKSD ELHLDTSYLDVQEVIDGSKADFQIEQRKEPLGSRLVINNASCNDFTLNIQFR TT
DKCTALQWLNSKQTKGGKPYVFSQLEA IHARSLFPCFDTPSVKSTFTASIESPLPVVFSGIRIEDTSKDTNIYRFEQKVP
IPAYLIGIASGDLSSAPIGPRSTVYTEPFR LKDCQWEFENDVEKFIQTAEKIIF EYEWGTYDILVNVDSYPYGGMESPNM
TFATPTLIAHDRSNIDVIAHEL AHSWSGNLVTNCSWNHFWLNEGWTVY LERRIIGA IHGEPTRHFSALIGWSDLQNSIDS
MKDPERFSTLVQNLNDNTDPDDAFSTVPY EKGFNLLFHLETILGGKAEFDPFIRHYFKKFAK KSLDTFQFLDTLYEFYPE
KKEILDSVDWETWLYKPGMPPRPHFITALADNVYQLADKWVEMAQHLKTTEDFRSEFNAIDIKDFNSNLVLFLETLTQN
GHSNKKPKDFDWAKFPVASRALLDIYQDNIVKSQNAEVVFKMFKFQIFAKLQEEYKHLADWLGTVGRMKFVRPGYRLLNS
VDRRLALATFDKFKD TYHPICKALVKQDLGL
>lcl|6324848Sc unnamed protein product
MLKGPLKGCLNMSKKVIV IAGTTGVGKSQLSIQLAQKFNGEVINS DSMQVYKDIP IITNKHPLQEREGIPHHVMNHVDWS
EEYYSHRFETECMNAIEDI HRRGKIPIVVG GTHYLLQTLFNKRVDTKSSERKLRTRKQLDILESTDPDVIYNTLVKCDPDI
ATKYHPNDYRRVQRMLEIYYKTGKKPSETFNEQKITLKFDTLFLWL YSKPEPLFQRLDDRVDMLER GALQEIKQLYEYY
SQNKFTPEQCENGWVQVIGFKEFLPWL TGKTDNTVKLEDCIERMKT RTRQYAKRQVKWIKKMLIPDIKGD IYLLDATDL
SQWDTNASQRAIAISNDFISNRPIKQERAPKALEELLSKGETTMMK LDDWTHYTCNVCRNADGKNVVAIGEKYWKIHLGS
RRHKS NLKRNRTRQADFEKWKINKKETVE
```

## 2 Annotated Phylograms

All trees were generated from an initial run of Darren's Orchard pipeline against 139 taxa (Table S1), using the above corresponding un-fused sequences as BLAST seeds. The alignments were then checked for any missing taxa, manually masked and then ProtTest3 was run, please see the Methods section for detail. The final trees were generated by the following command:

```
phyml -i alignment_file -d aa -b 100 -m model -c 8 -v invariant_sites -s BEST --quiet
-a gamma
```

Styling and annotation was made possible by Dendroscope and Inkscape.

## 3 Mesquite Cladogram

This tree is the 68-gene concatenated phylogeny (Fig. 1), with the presence of a fusion (black), presence of a fission (white), and absent/undetermined (grey) status of gene fusion characters plotted on to it using a "1/0/-" nexus-style data matrix. We used the program 'Mesquite' to calculate proportional likelihoods based on either an "Mk1" or "Assym. 2 param model." (see Table S4) of character change across the fungal phylogeny (Fig. 1). This allowed for a proportional likelihood of the position of the fusion/fission to be calculated.

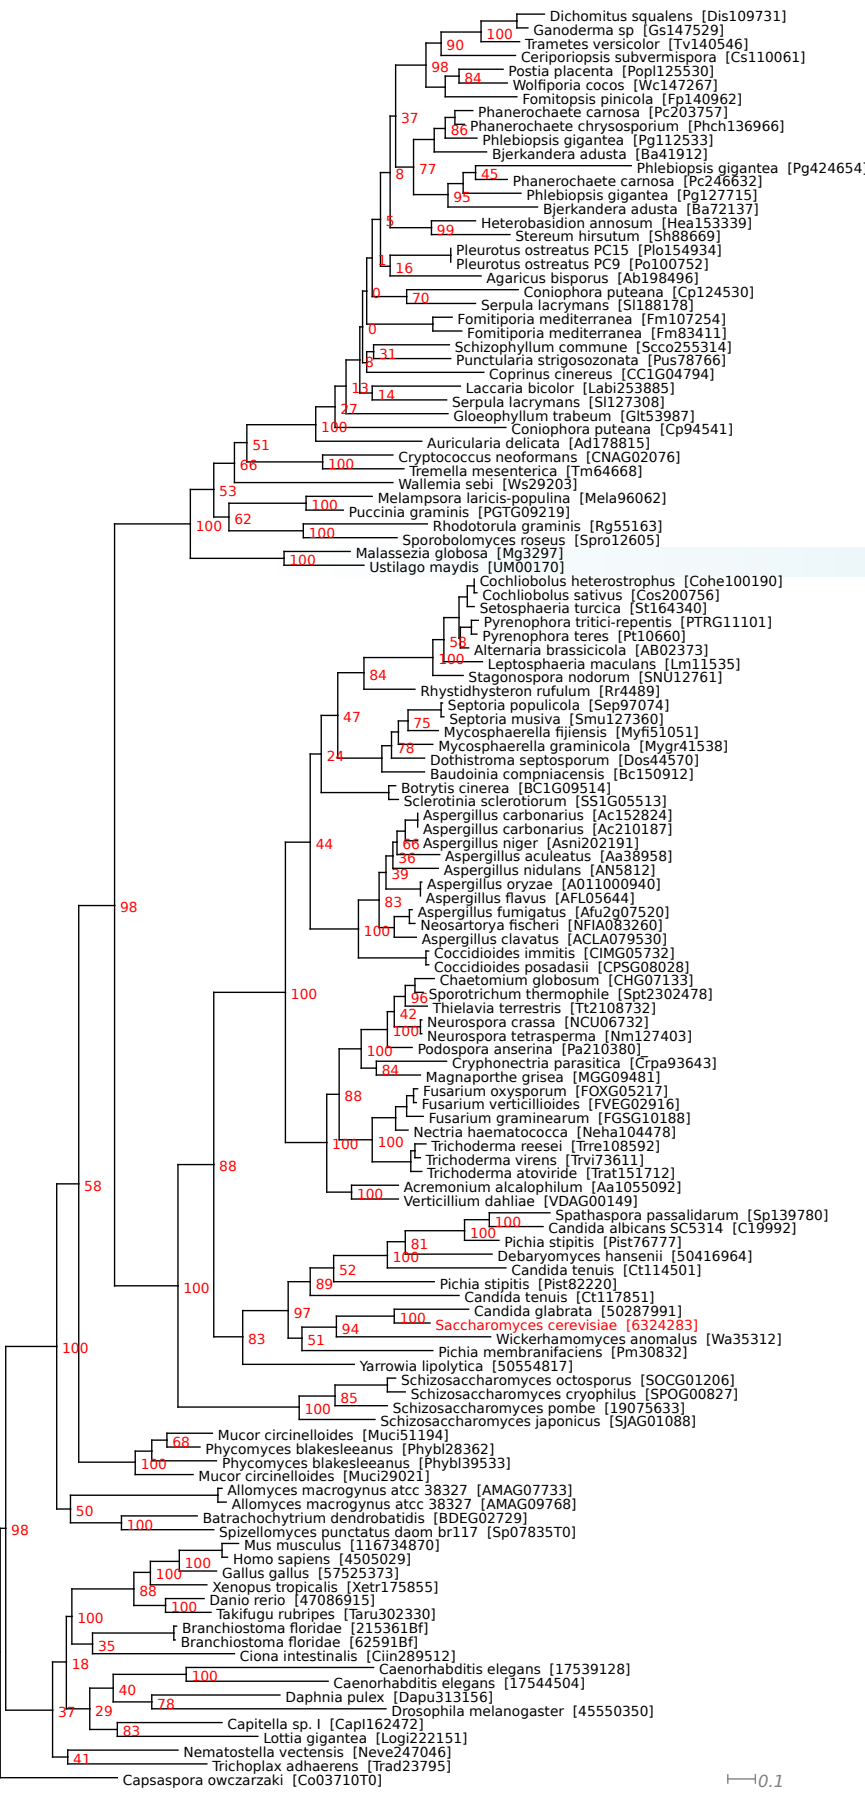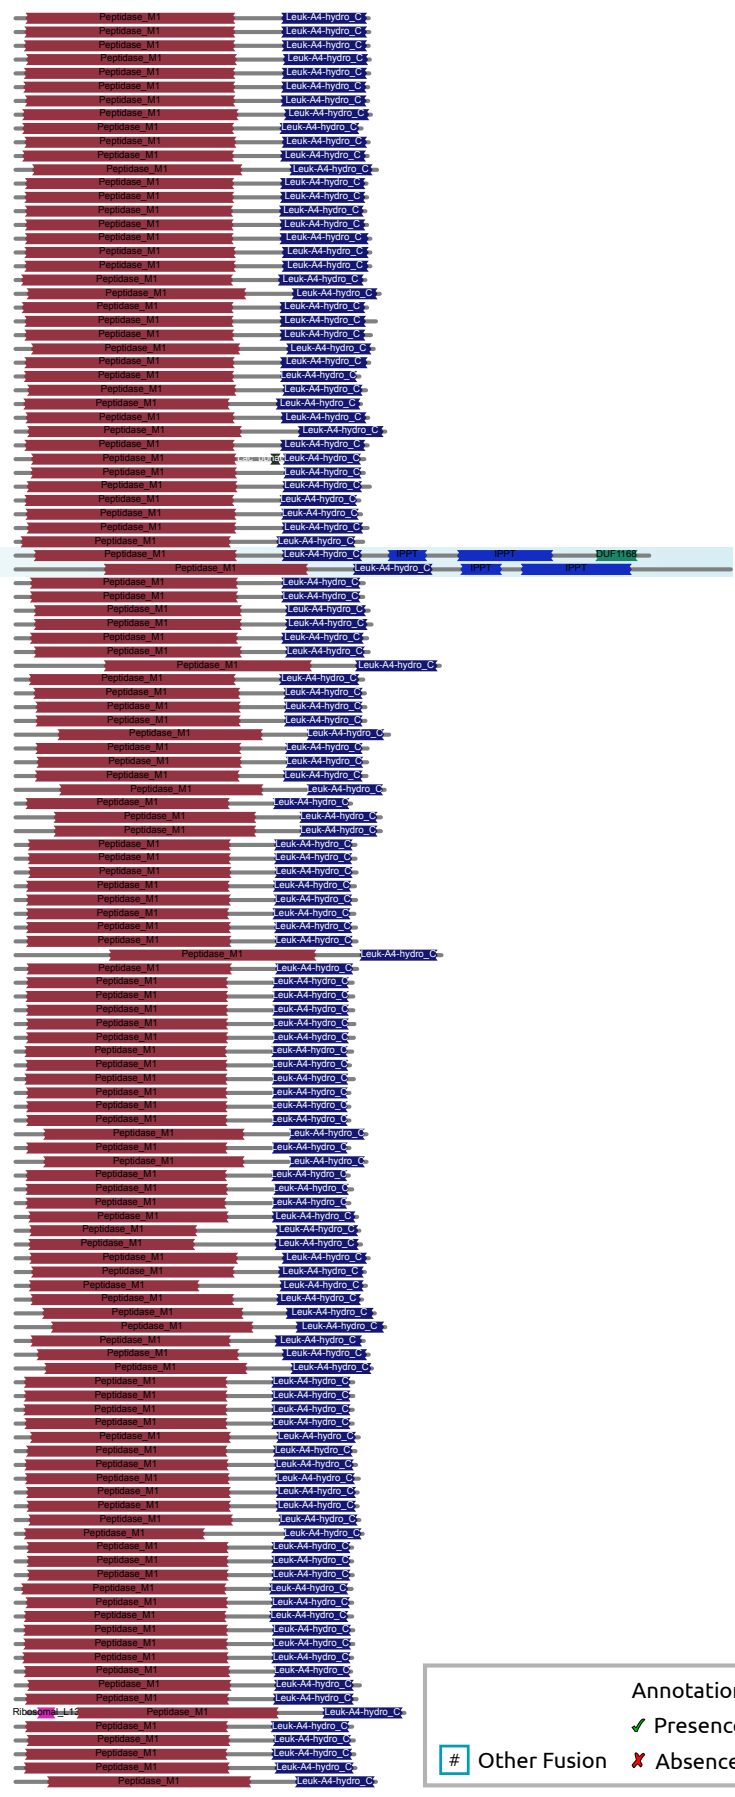

Annotation  
 ✓ Presence  
 # Other Fusion  
 ✗ Absence

1=0.1



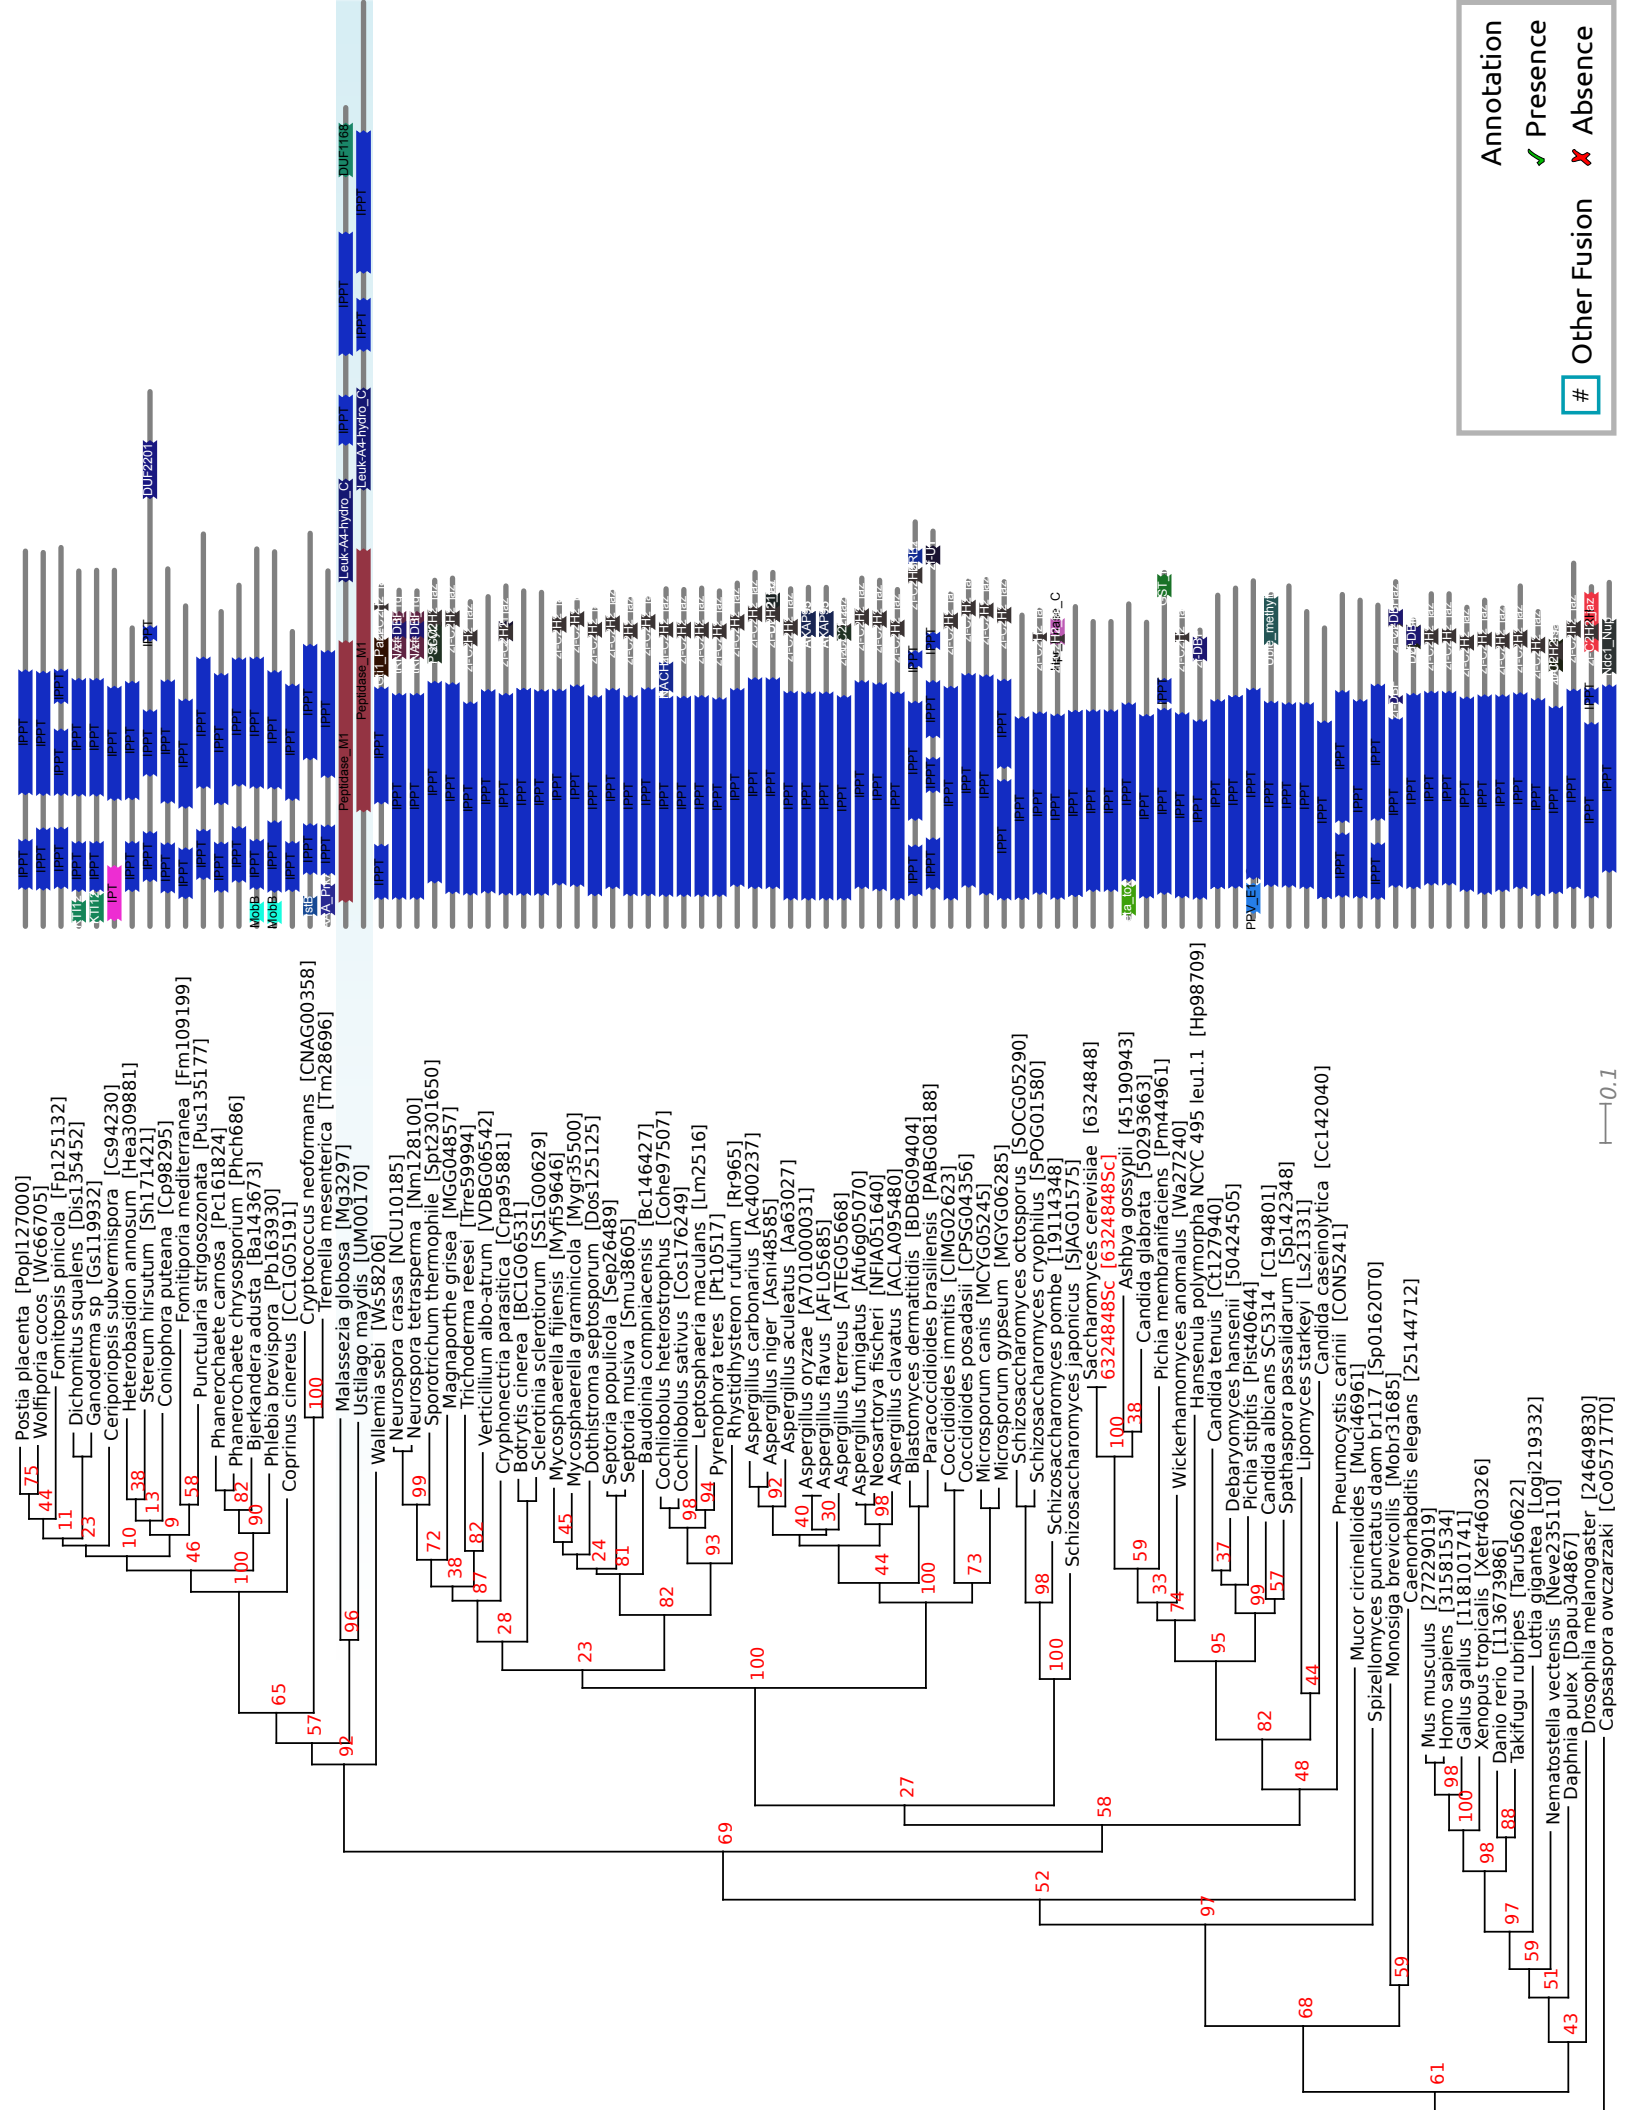

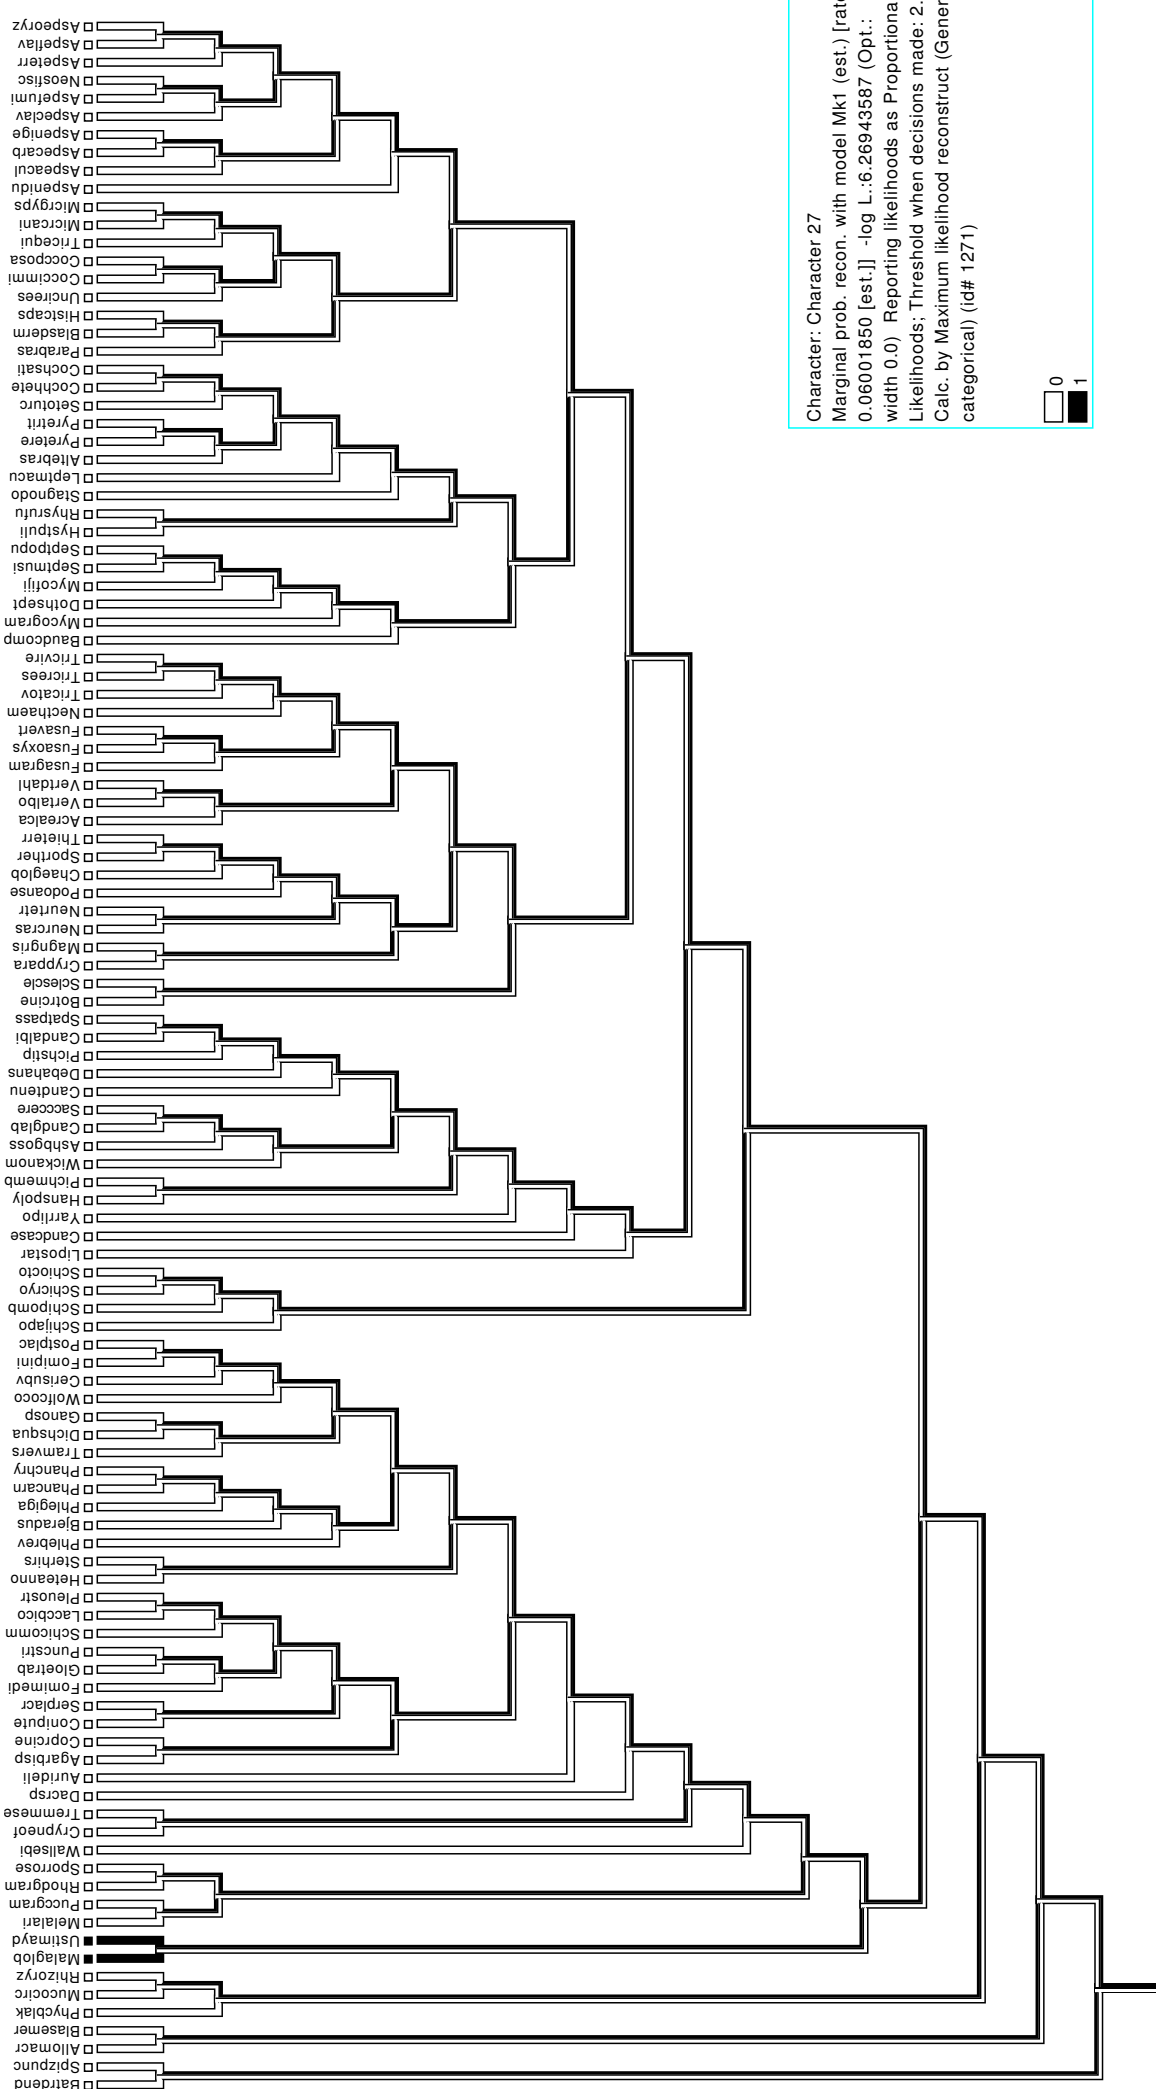

Character: Character 27  
 Marginal prob. recon. with model Mk1 (est.) [rate  
 0.06001850 [est.]] -log L.:6.26943587 (Opt.:  
 width 0.0) Reporting likelihoods as Proportional  
 Likelihoods; Threshold when decisions made: 2.0  
 Calc. by Maximum likelihood reconstruct (Generic  
 categorical) (idf: 1271)



# Putative Fusion 28

September 26, 2012

## 1 Fasta Sequences

These are the unfused sequences identified by fdfBLAST belonging to the putative gene fusion in FASTA format. Accessions may be shortened, but belong to either the taxons individual genome project or NCBI's accession numbering.

```
>lcl|6322896Sc unnamed protein product
MPSLTPRCIIVRHGQTEWSKSGQYTGLTDLPLTPYEGEQMLRGTGESVFRNNQFLNPDNITYIFTSPRLRARQTVDLVLKP
LSDEQRAKIRVVVDDDLREWEYGDYEGMLTREIIELRKSRGLDKERPWNIRWDCENGETTQQIGLRLSRAIARIQNLHR
KHQSEGRASDIMVFAHGHALRYFAAIWFGLGVQKKCETIEEIQNVKSYDDDTVPYVKLESYRHLVDNPCFLLDAGGIGVL
SYAHHNIDEPALELAGPFVSPPEEESQHGDV
>lcl|83578104Sc unnamed protein product
MTMDGKNKEEQYLDLCKRIIDEGEFRPDRTGTGTLSLFAPPQLRFSRLRDDTFPLLTTKKVFTRGIIELLEWFLAGDTDA
NLLSEQGVKIWDGNGSREYLDKMGFKDRKVGDLGPVYGFQWRHFGAKYKTCDDDYTGQGIDQLKQVIHKLKTNPYDRRII
MSAWNPAFDKMALPPCHIFSQFYVSFPKEGEGSGKPRLSCLLYQRSCDMGLGVFPFNIAASYALLTRMIAKVVDMEPGEFI
HTLGDHAVYKDHIDALKEQITRNPRPFPKLIKRDVKDIDDFKLTDFEIEDYNPHPRIQMKMSV
```

## 2 Annotated Phylograms

All trees were generated from an initial run of Darren's Orchard pipeline against 139 taxa (Table S1), using the above corresponding un-fused sequences as BLAST seeds. The alignments were then checked for any missing taxa, manually masked and then ProtTest3 was run, please see the Methods section for detail. The final trees were generated by the following command:

```
phyml -i alignment_file -d aa -b 100 -m model -c 8 -v invariant_sites -s BEST --quiet
-a gamma
```

Styling and annotation was made possible by Dendroscope and Inkscape.

## 3 Mesquite Cladogram

This tree is the 68-gene concatenated phylogeny (Fig. 1), with the presence of a fusion (black), presence of a fission (white), and absent/undetermined (grey) status of gene fusion characters plotted on to it using a "1/0/-" nexus-style data matrix. We used the program 'Mesquite' to calculate proportional likelihoods based on either an "Mk1" or "Assym. 2 param model." (see Table S4) of character change across the fungal phylogeny (Fig. 1). This allowed for a proportional likelihood of the position of the fusion/fission to be calculated.

### Annotation

✓ Presence

✗ Absence

# Other Fusion

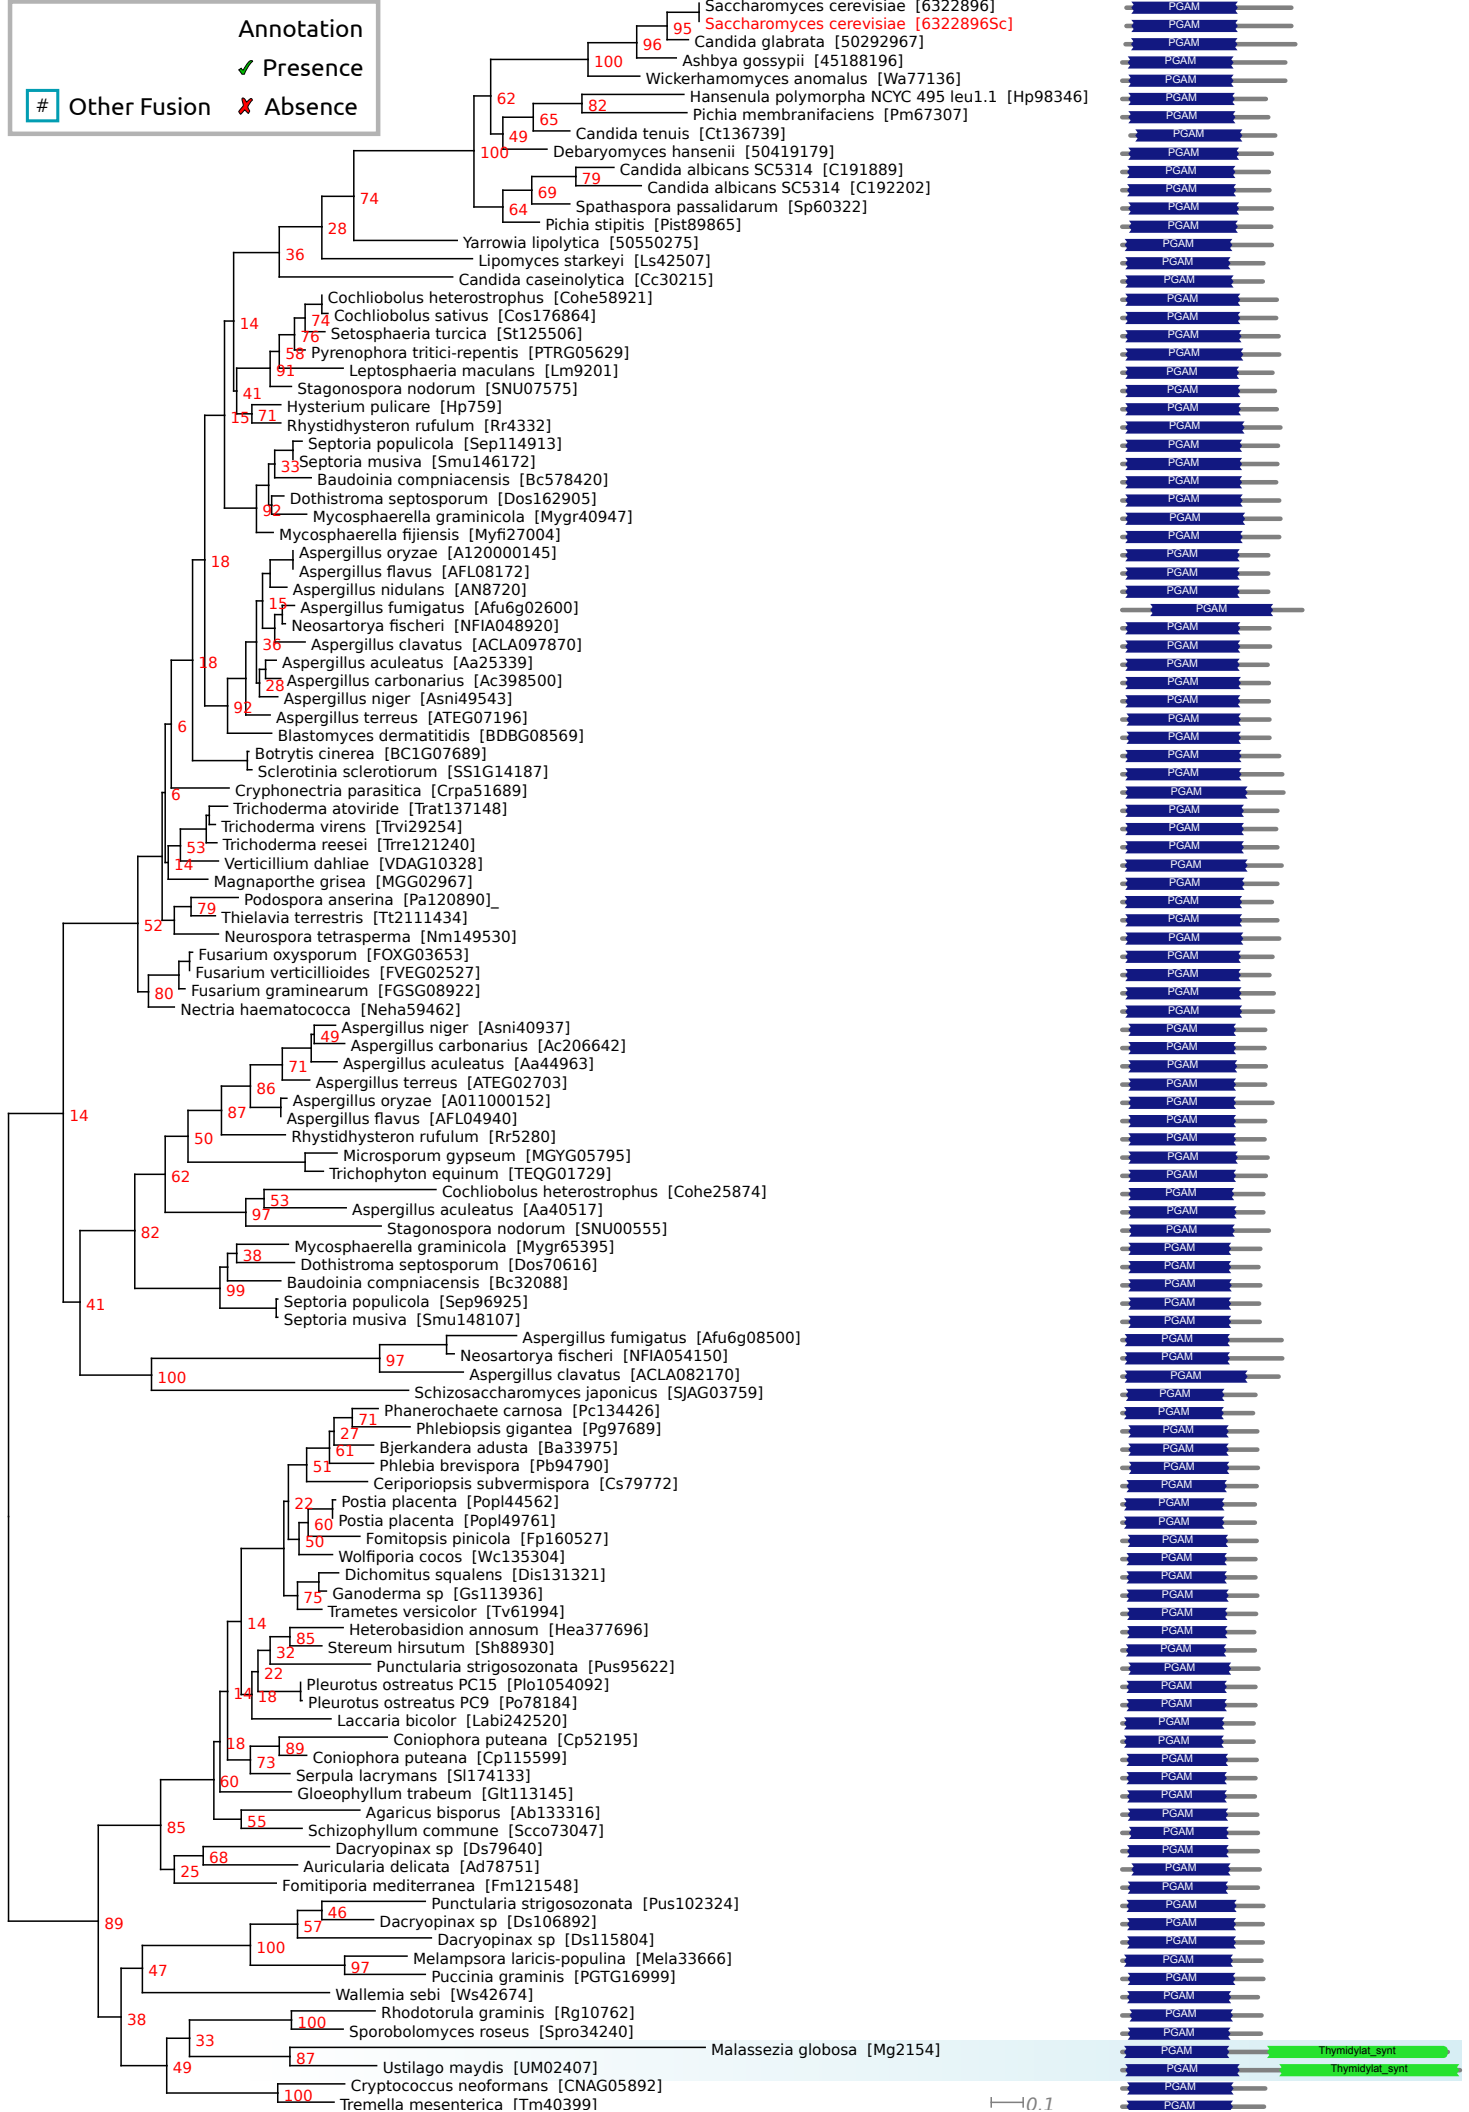

Thymidylat\_synth

0.1

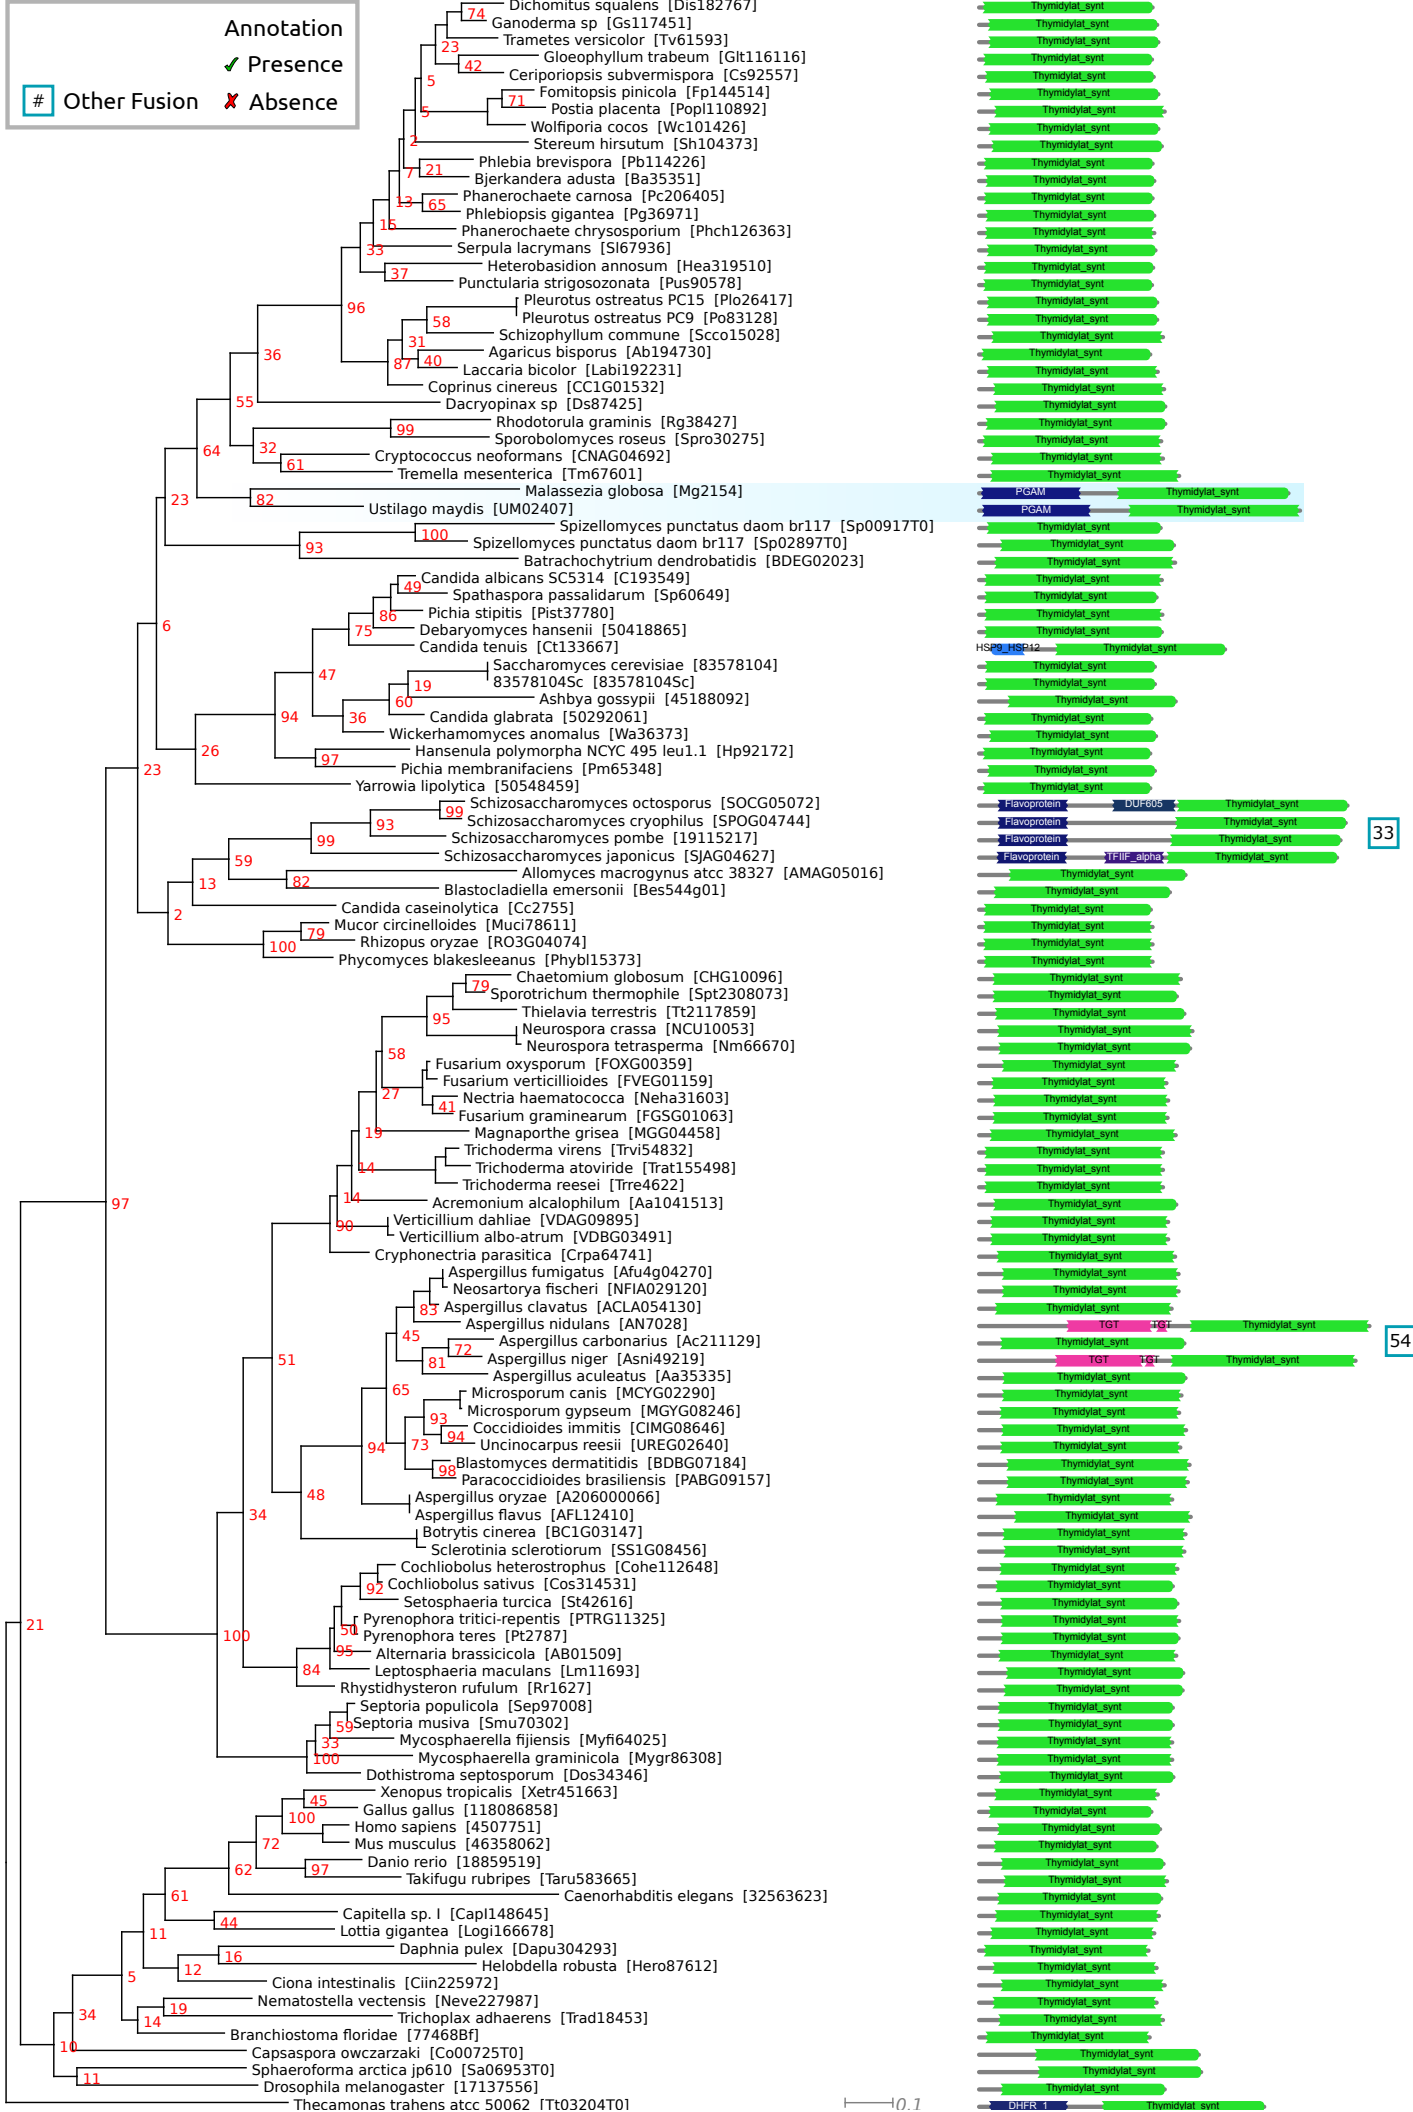



# Putative Fusion 29

September 26, 2012

## 1 Fasta Sequences

These are the unfused sequences identified by fdfBLAST belonging to the putative gene fusion in FASTA format. Accessions may be shortened, but belong to either the taxons individual genome project or NCBI's accession numbering.

```
>lcl|AMAG_01942 unnamed protein product
MSLAIDTRVKVLVTGASGLLGPVGAFFSRAEPPLVKVDLTSKESVVAAFDHLAPQGTEPVIHCAAERRPEVAEKDKDATT
KLNVDSTRLLAELCAARGIFLVYISTDYVFDGLKPSAYDVEDDVPNPLNGYGQSKRAGEIAVTEVMTAAGPNAKYAIMRVP
VLYGEVSPYVGNKESAVNILVDVARNASADRPQAVDDVMPRYPTHVGDVARVLADLTLRAAVKGELVHGIFHYSAEEQWT
KFDMTALFVELLGTTLDHIERVTTTPSTDVTRPKHVKLSTKRLRDMGVDVTARSFRGWWTANL
>lcl|AMAG_06610 unnamed protein product
MDSYATSATRATGFHAFGDDDPLANPFADMPASAGRTTPPSAQQIDQDAAAEESSDDEDNVTLGQYSSARILFTSDRVTDGS
HDTSTEPVVDHHDHAEHHTLTASPHHLPADASAPLSAALFDVSLHAPLPASPARAYIEPLTSTATPPPVLPAAPSGPPSR
MSSTASFTGTPLRARSGLASPALRQSLSSVAVHDPLVHPLAALVAPSAAPLAPTTAPAQTVPAVQAPAPLLPAADMHPGS
PDAASSVVGIPRSTVSTPTTPFPPLAAVASPIATNGGADRSLPAVPASPAPPSALQVDKRPLSYSKIQLQVPAVAASP
FKVSVSEPTKIGDAMSPFTAYKVVTKTTQPGFRSESVVSRRYSEFLWLYQRLVTQHPGIVVPGTPEKQAIIGRFSEGFVEH
RRVGLQVFLRKVAHAHPVLRDPAFQMFVEAESLKDEIQADKNVTLPPKAKMNEIDPWFEKRRQVDQFEAQIKALNKSLD
LLATRQRETATAHYELAETLAMLAEVELPHPFGRRVEMLAETHKRVRDLLFAMATIDLGAMQ TALDDQLRTVAAIRVATQ
LRANAYVHWQALETAVLKKEAAVKKSRVQMPALEAEVYELTQQRAAAKNLFETTSMTLRQELERVDQDKVHELSSAAIKCV
AESLWGHQQETVNLWDELIKARPAMPV
```

## 2 Annotated Phylograms

All trees were generated from an initial run of Darren's Orchard pipeline against 139 taxa (Table S1), using the above corresponding un-fused sequences as BLAST seeds. The alignments were then checked for any missing taxa, manually masked and then ProtTest3 was run, please see the Methods section for detail. The final trees were generated by the following command:

```
phyml -i alignment_file -d aa -b 100 -m model -c 8 -v invariant_sites -s BEST --quiet
-a gamma
```

Styling and annotation was made possible by Dendroscope and Inkscape.

## 3 Mesquite Cladogram

This tree is the 68-gene concatenated phylogeny (Fig. 1), with the presence of a fusion (black), presence of a fission (white), and absent/undetermined (grey) status of gene fusion characters plotted on to it using a "1/0/-" nexus-style data matrix. We used the program 'Mesquite' to calculate proportional likelihoods based on either an "Mk1" or "Assym. 2 param model." (see Table S4) of character change across the fungal phylogeny (Fig. 1). This allowed for a proportional likelihood of the position of the fusion/fission to be calculated.







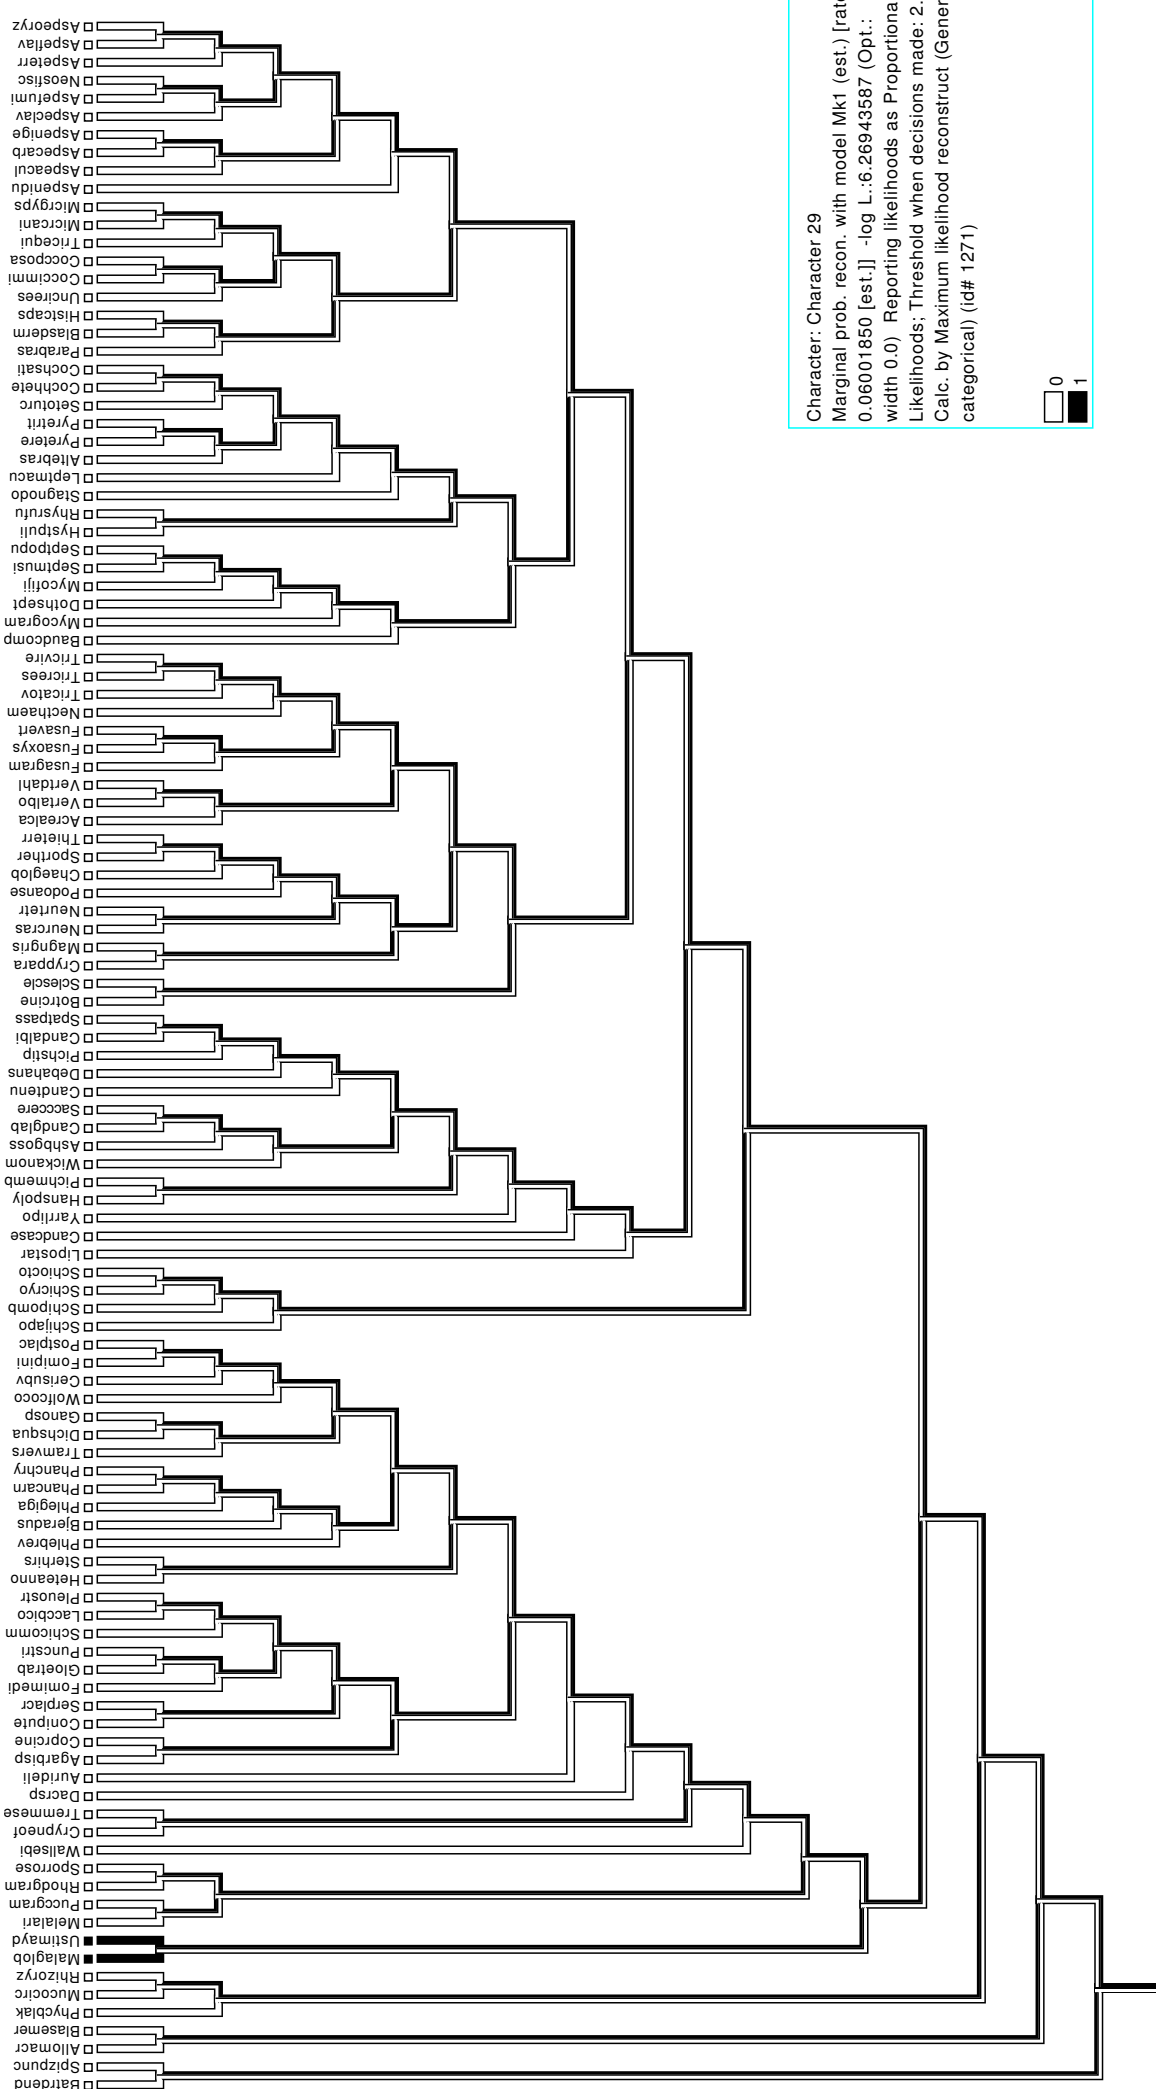

Character: Character 29  
 Marginal prob. recon. with model Mk1 (est.) [rate  
 0.06001850 [est.]] -log L.:6.26943587 (Opt.:  
 width 0.0) Reporting likelihoods as Proportional  
 Likelihoods; Threshold when decisions made: 2.0  
 Calc. by Maximum likelihood reconstruct (Generic  
 categorical) (idf: 1271)



# Putative Fusion 30

September 26, 2012

## 1 Fasta Sequences

These are the unfused sequences identified by fdfBLAST belonging to the putative gene fusion in FASTA format. Accessions may be shortened, but belong to either the taxons individual genome project or NCBI's accession numbering.

```
>NCU04237
MLQAIDNIHDRQFLAAELASSATLAAELAQPEIKNILLAASGSVATIKSKSSYQYGTTWALARHGDKIRI
RIILTHFAKHFLGGQSKEQPVYSSLLDYPHVEAIYDDADEWGPEPWQRGASILHIELRRWADILVVAPLS
ANTLAKIVNGMSDNLLTSVIRAWDTDSSIDNKKKVIMVAPAMNSAMWRHPITAKQIRVLQEEWGVRDPEP
SEGDTAGVAVANGWFQVIMDSMW
>NCU10053
MTVTTSEPVAPAQSQSQTSSRTNPTSKRHEEYQYLDLVRQILDEGELREDRTGTGTYSIFAPTPLKFALS
RPSSSSPSSGSSSDPSSPDYTYTPILPLLTTRVFTKAVLLELLWFISASTSSTTLAQGVKIWDGNGSR
AFLDMLGLSHRKEGDLGPVYGFQWRHFGAEYVDCETDYTGQGVQDLQRIIDTLRNNPYDRRLILSAWNP
DMSQMVLPCHMFAQFYVSYPGSRTRGGATQTQNKEGELDTPPKKKPRGHLHCQLYQRSCDMGLGVFPN
IASYALLTHMLAHVCDLVPGLTHVMGDAHVYLNHVDALKTQLEREPREFPTLEIQREKGGSIDGWKAED
FVIKGYEPHKTIAMEMSV
```

## 2 Annotated Phylograms

All trees were generated from an initial run of Darren's Orchard pipeline against 139 taxa (Table S1), using the above corresponding un-fused sequences as BLAST seeds. The alignments were then checked for any missing taxa, manually masked and then ProtTest3 was run, please see the Methods section for detail. The final trees were generated by the following command:

```
phym1 -i alignment_file -d aa -b 100 -m model -c 8 -v invariant_sites -s BEST --quiet
-a gamma
```

Styling and annotation was made possible by Dendroscope and Inkscape.

## 3 Mesquite Cladogram

This tree is the 68-gene concatenated phylogeny (Fig. 1), with the presence of a fusion (black), presence of a fission (white), and absent/undetermined (grey) status of gene fusion characters plotted on to it using a "1/0/-" nexus-style data matrix. We used the program 'Mesquite' to calculate proportional likelihoods based on either an "Mk1" or "Assym. 2 param model." (see Table S4) of character change across the fungal phylogeny (Fig. 1). This allowed for a proportional likelihood of the position of the fusion/fission to be calculated.

Annotation  
 ✓ Presence  
 # Other Fusion ✗ Absence

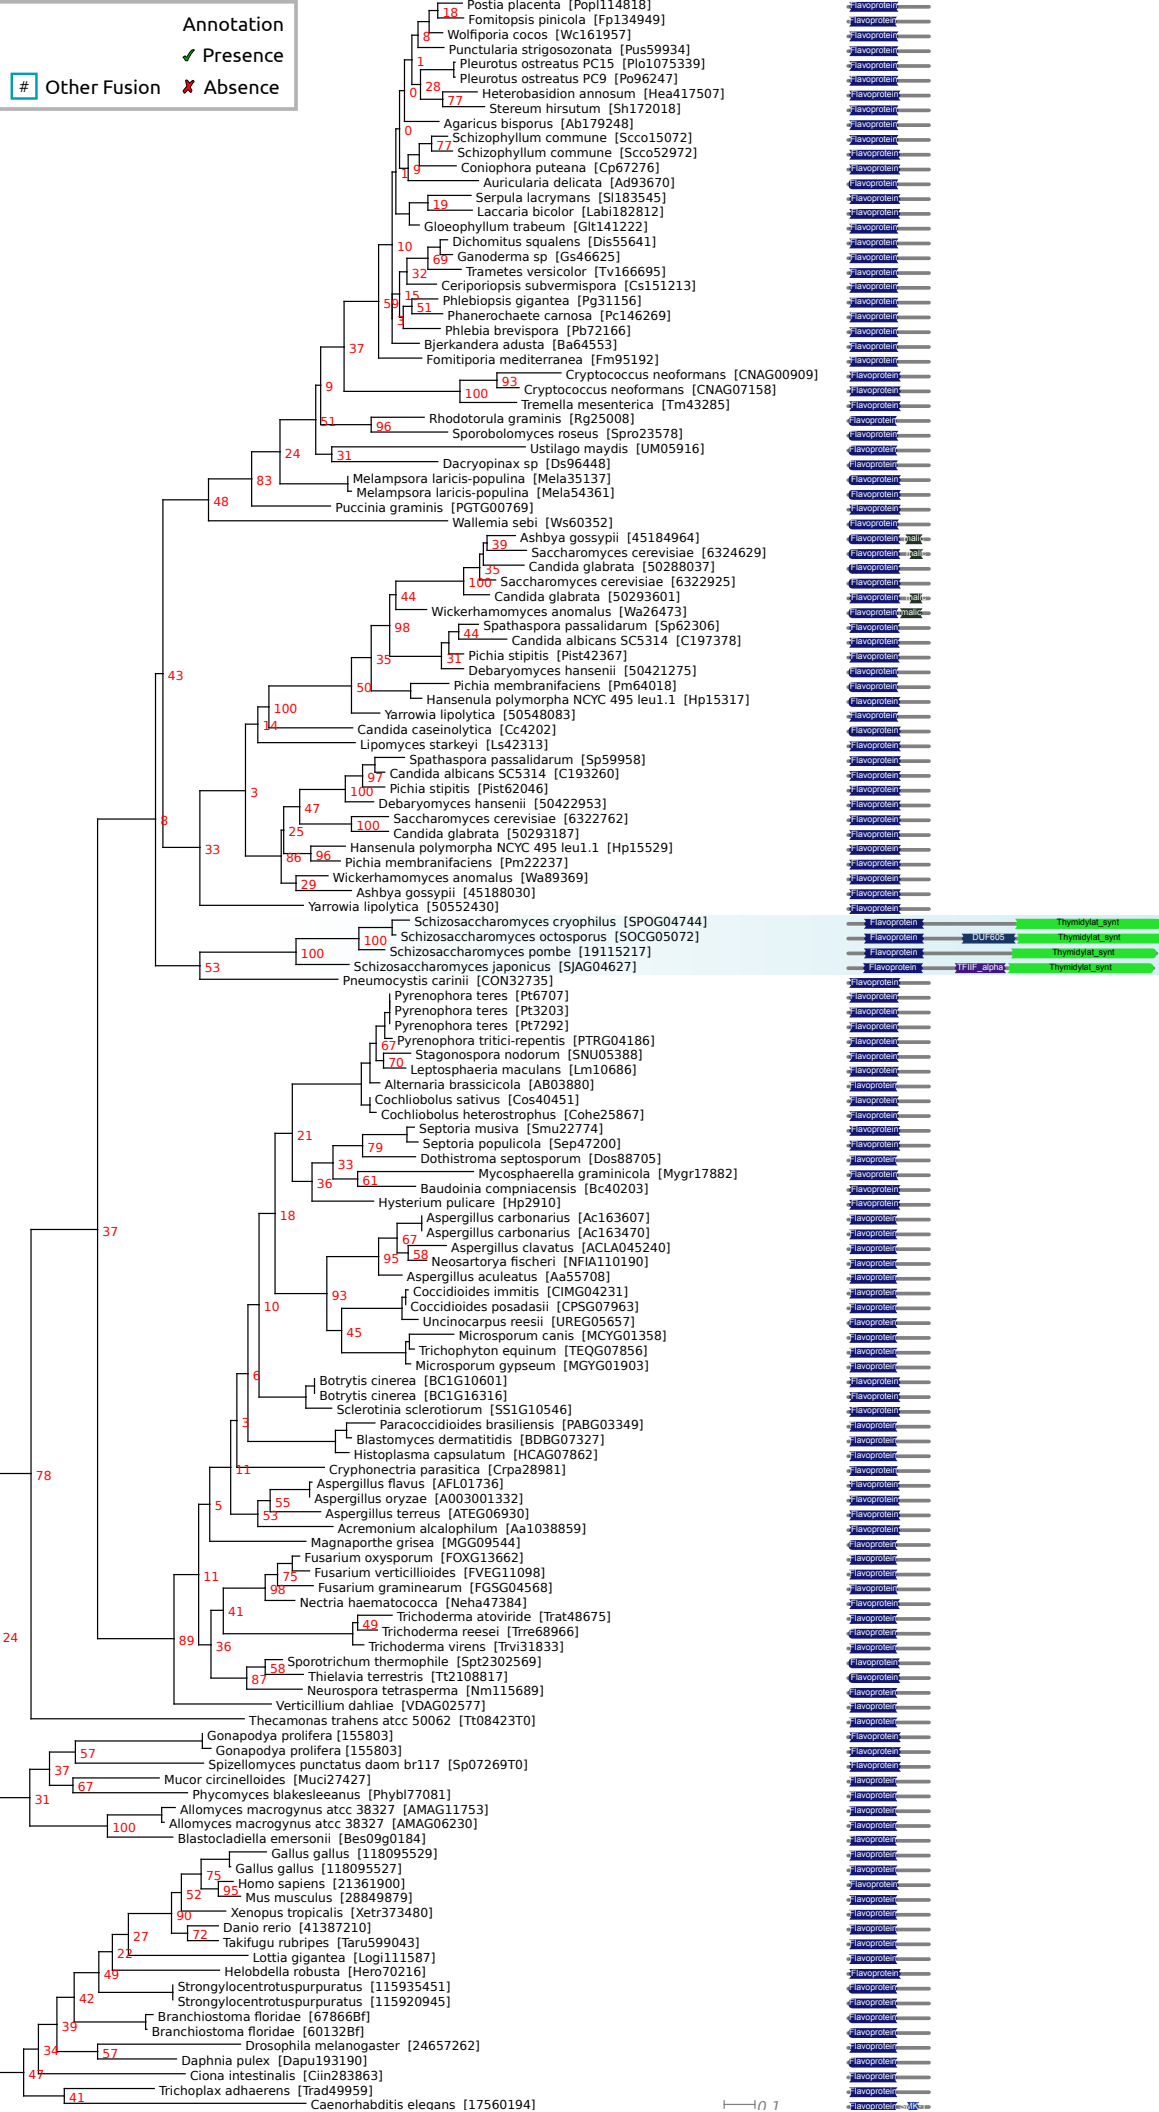

Annotation  
 ✓ Presence  
 # Other Fusion ✗ Absence

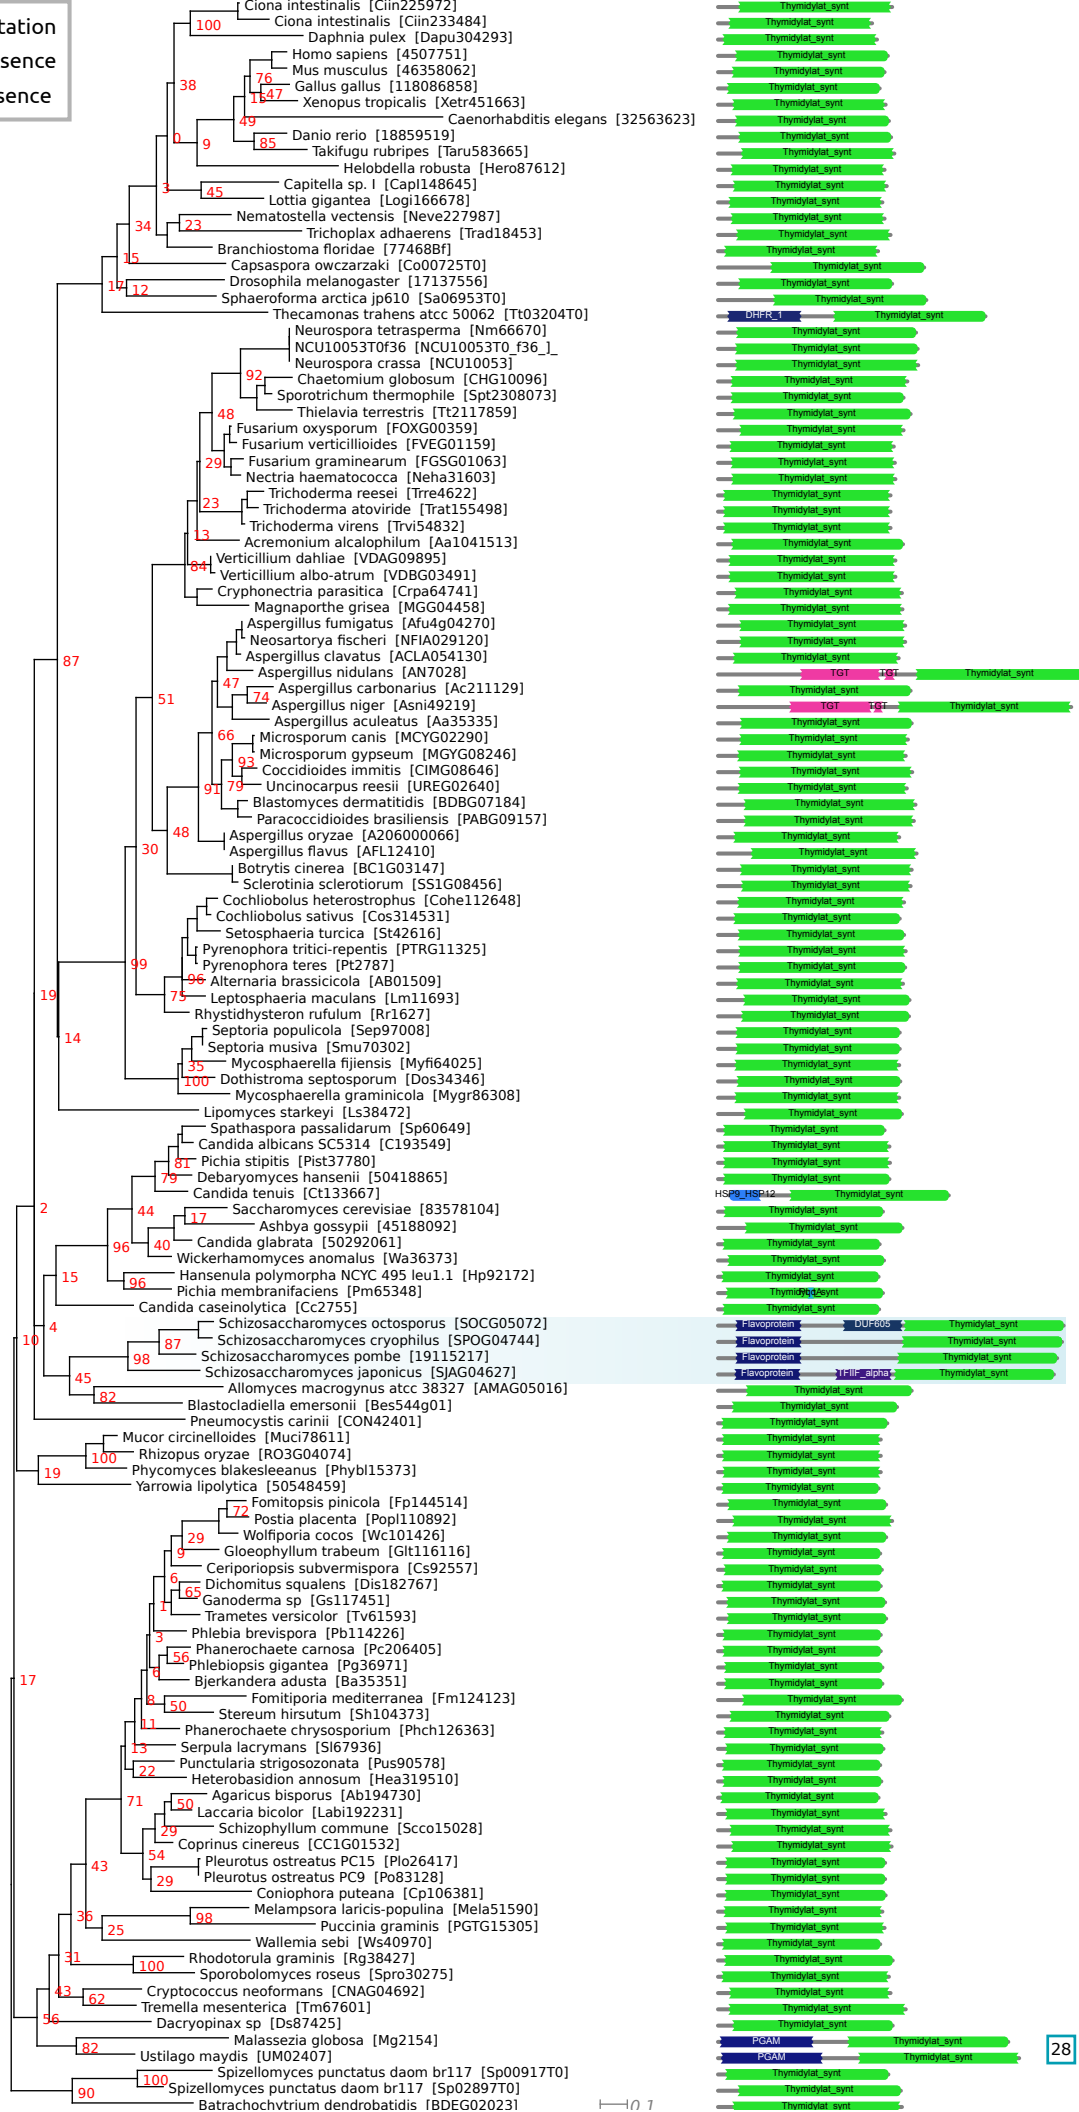

54

28

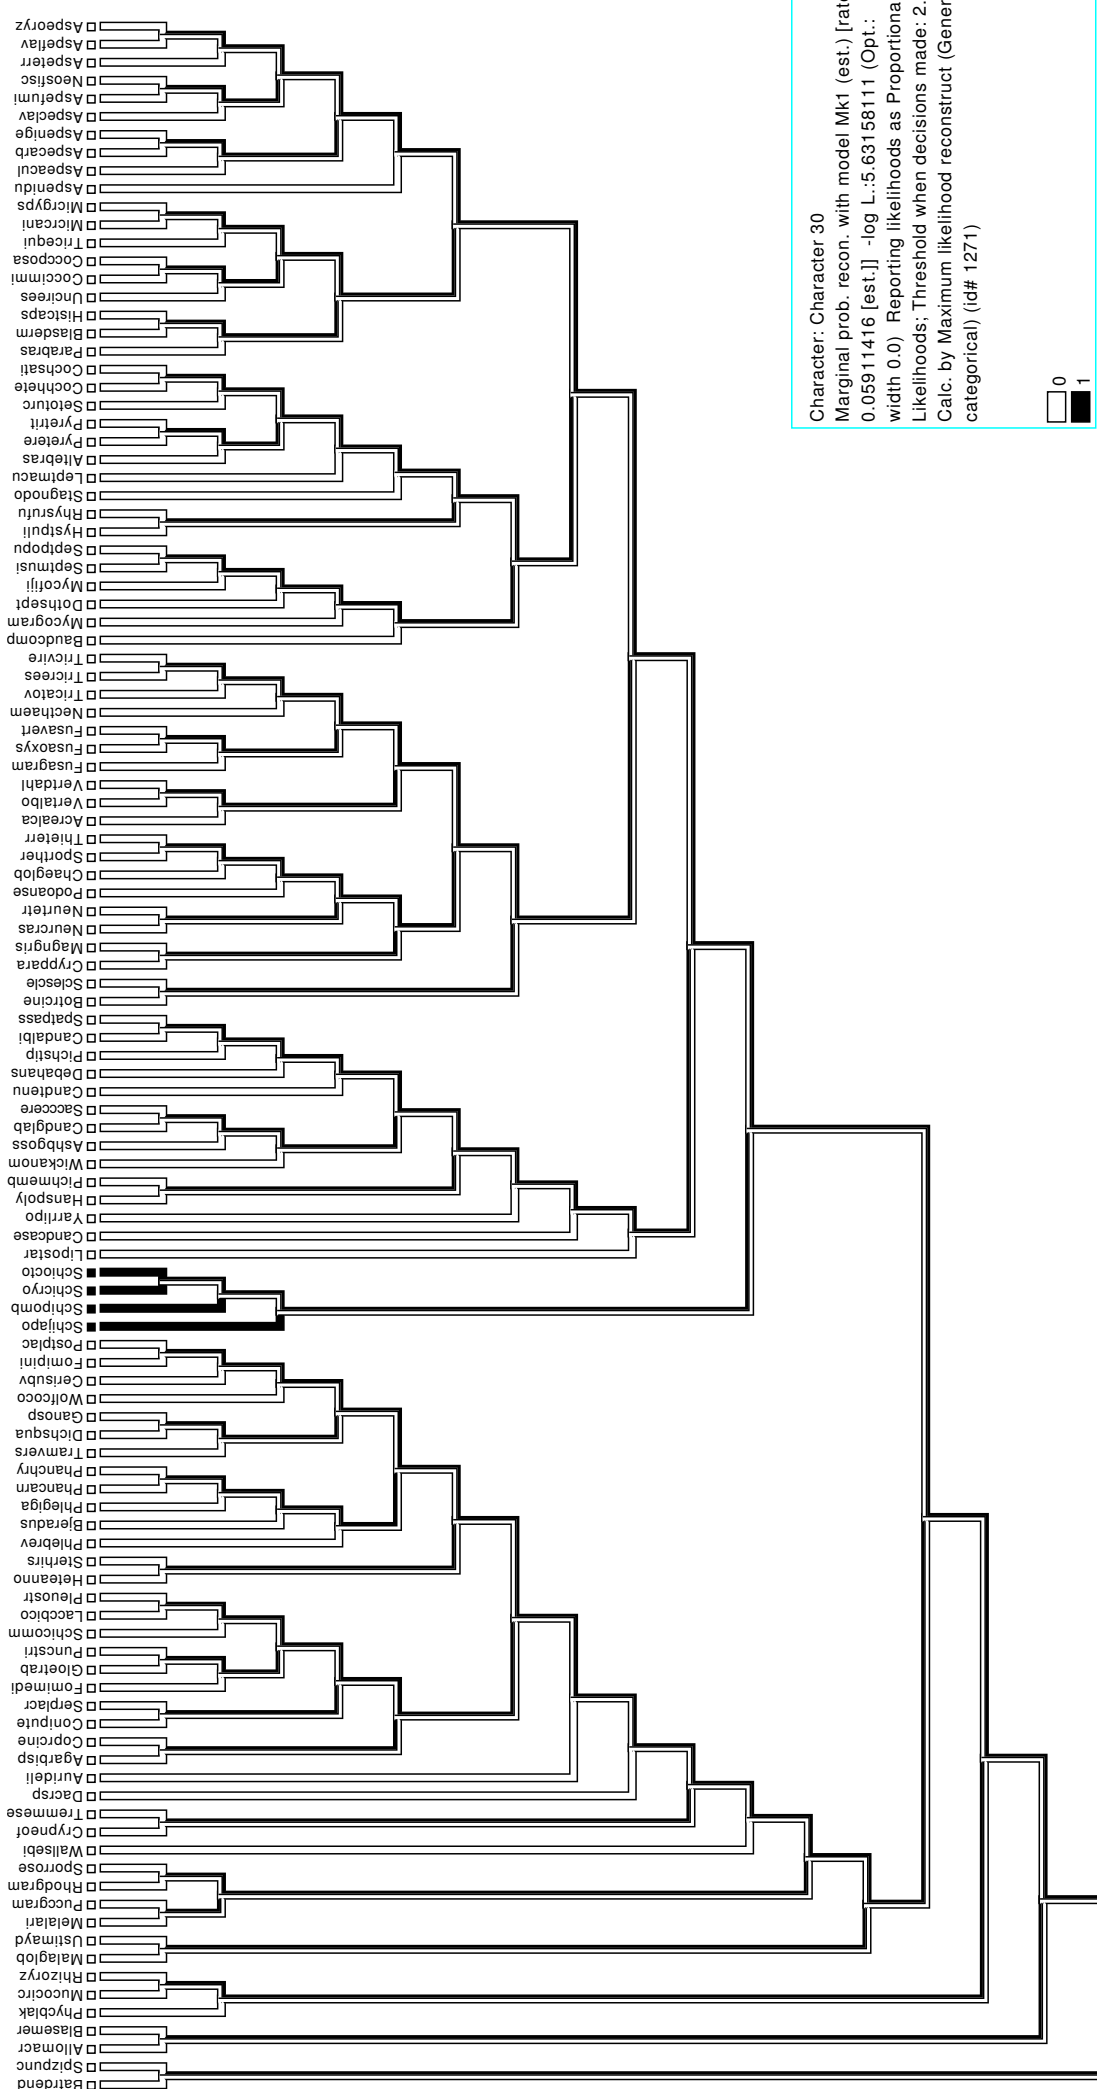

Character: Character 30  
 Marginal prob. recon. with model Mk1 (est.) [rate  
 0.05911416 [est.]] -log L.:5.63158111 (Opt.:  
 width 0.0) Reporting likelihoods as Proportional  
 Likelihoods; Threshold when decisions made: 2.0  
 Calc. by Maximum likelihood reconstruct (Generic  
 categorical) (idf: 1271)

0  
 1

Modified from Tree1++



# Putative Fusion 31

September 26, 2012

## 1 Fasta Sequences

These are the unfused sequences identified by fdfBLAST belonging to the putative gene fusion in FASTA format. Accessions may be shortened, but belong to either the taxons individual genome project or NCBI's accession numbering.

```
>lcl|6319631Sc unnamed protein product
MSSVNANGGYTKPQKYVPGPDPELPPQLSEFKDKTSDEILKEMNRMPFFMTKLDETDGAGGENVELEALKALAYEGEPH
EIAENFKKQGNELYKAKRFKDARELYSKGLAVECEDKSINESLYANRAACELELKNYRRCIEDCSKALTINPKNVKCYR
TSKAFFQLNKLEEAKSAATFANQRIDPENKSILNMLSVIDRKEQELKAKEEKQREAQERENKKIMLESAMTLRNITNIK
THSPVELLNEGKIRLEDPMDFESQLIYPALIMYPTQDEFDFVGEVSELTTVQELVDLVLEGPQERFKKEGKENFTPKKVL
VFMETKAGGLIKAGKCLTFHDILKKESPDVPLFDNALKIYIVPKVESEGWISKWDKQKALERRSV
>lcl|6324670Sc unnamed protein product
MSAPQAKILSQAPTELELQVAQAFVELENSPELKAELRPLQFKSIREIDVAGGKKALAI FVPVPSLAGFHKVQTKLTRE
LEKKFQDRHVIFLAERRILPKPSRTSRQVQKRPRSRTLTAVHDKILEDLVFPTEIVGKRVRYLVGGNKIQKVL L DSKDVQ
QIDYKLESFQAVYNKLTGKQIVFEIPSETH
```

## 2 Annotated Phylograms

All trees were generated from an initial run of Darren's Orchard pipeline against 139 taxa (Table S1), using the above corresponding un-fused sequences as BLAST seeds. The alignments were then checked for any missing taxa, manually masked and then ProtTest3 was run, please see the Methods section for detail. The final trees were generated by the following command:

```
phym1 -i alignment_file -d aa -b 100 -m model -c 8 -v invariant_sites -s BEST --quiet
-a gamma
```

Styling and annotation was made possible by Dendroscope and Inkscape.

## 3 Mesquite Cladogram

This tree is the 68-gene concatenated phylogeny (Fig. 1), with the presence of a fusion (black), presence of a fission (white), and absent/undetermined (grey) status of gene fusion characters plotted on to it using a "1/0/-" nexus-style data matrix. We used the program 'Mesquite' to calculate proportional likelihoods based on either an "Mk1" or "Assym. 2 param model." (see Table S4) of character change across the fungal phylogeny (Fig. 1). This allowed for a proportional likelihood of the position of the fusion/fission to be calculated.

Annotation

✓ Presence

# Other Fusion ✗ Absence

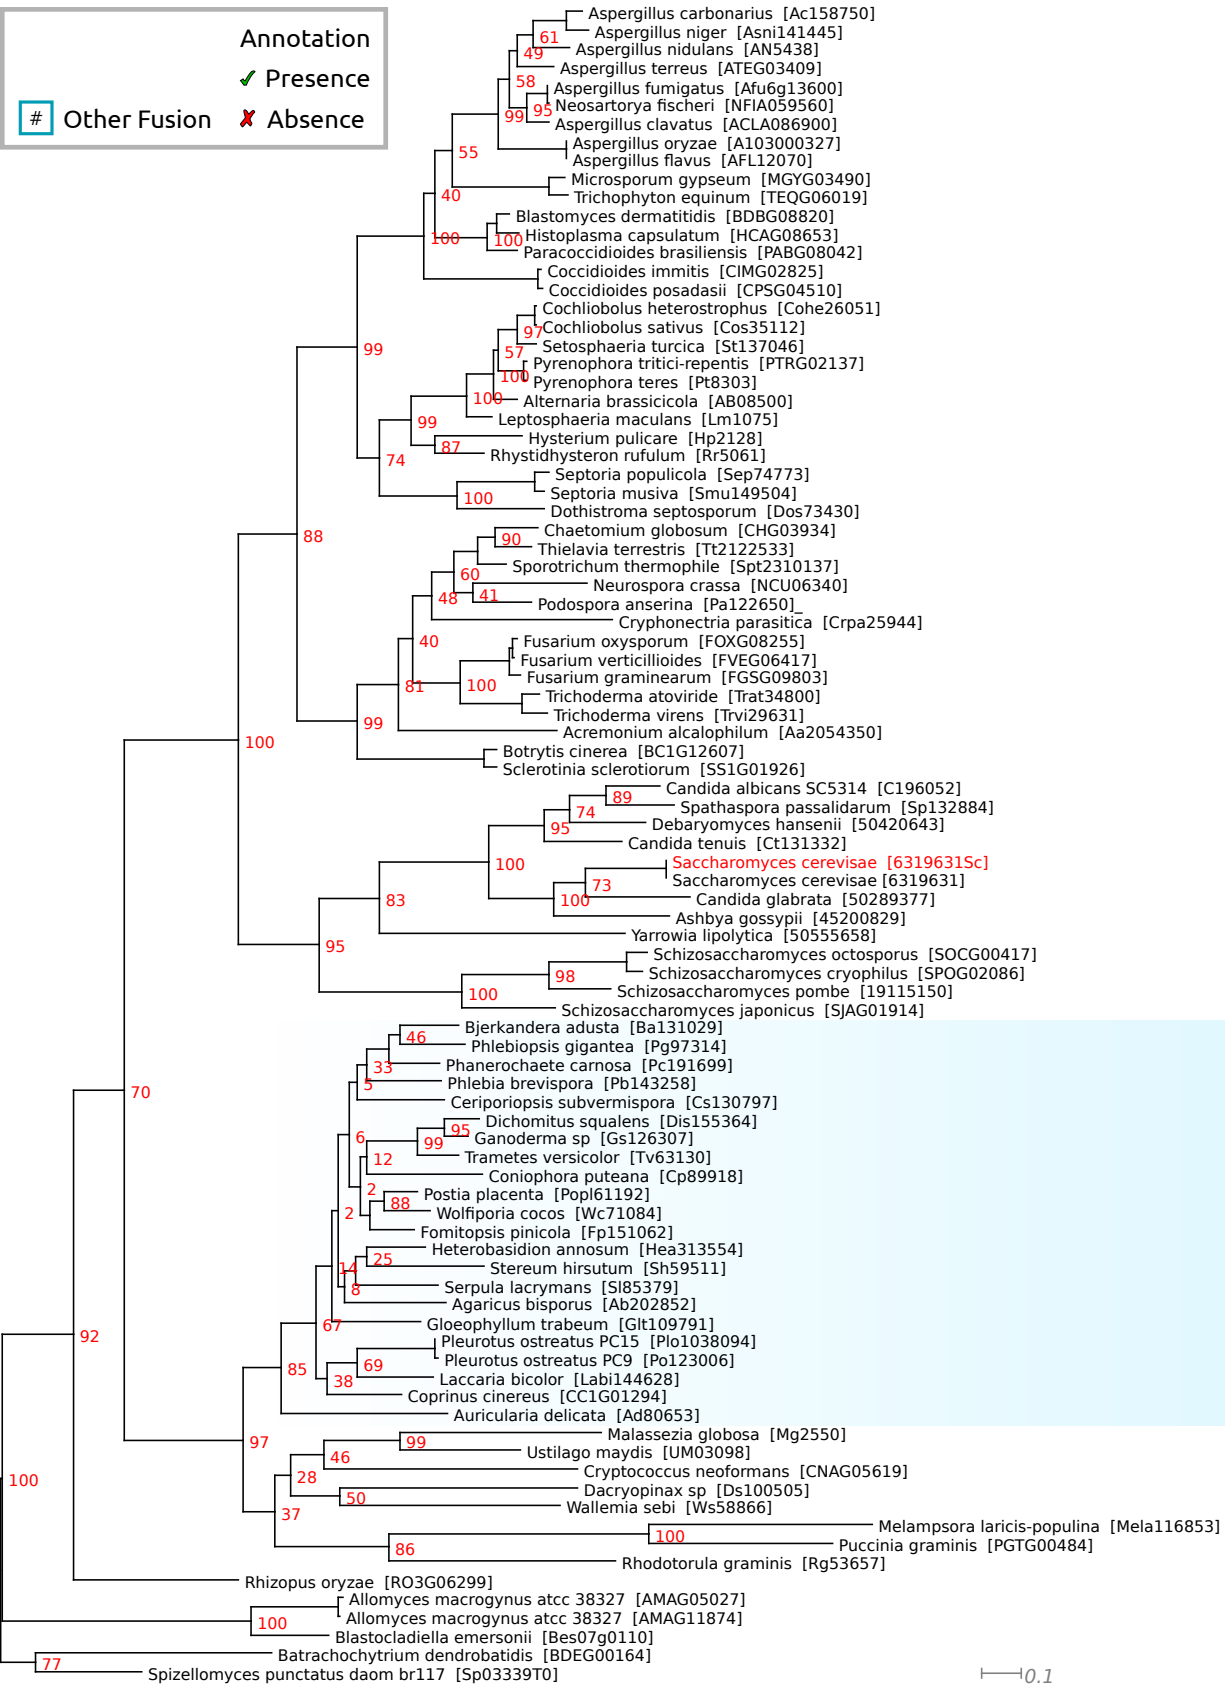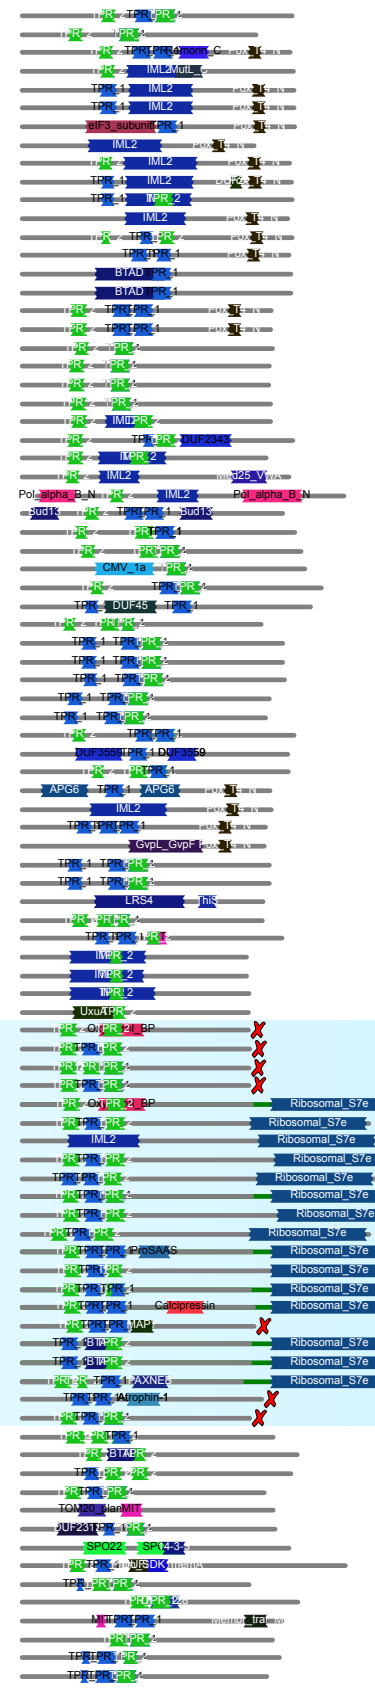

0.1

Annotation

✓ Presence

✗ Absence

# Other Fusion

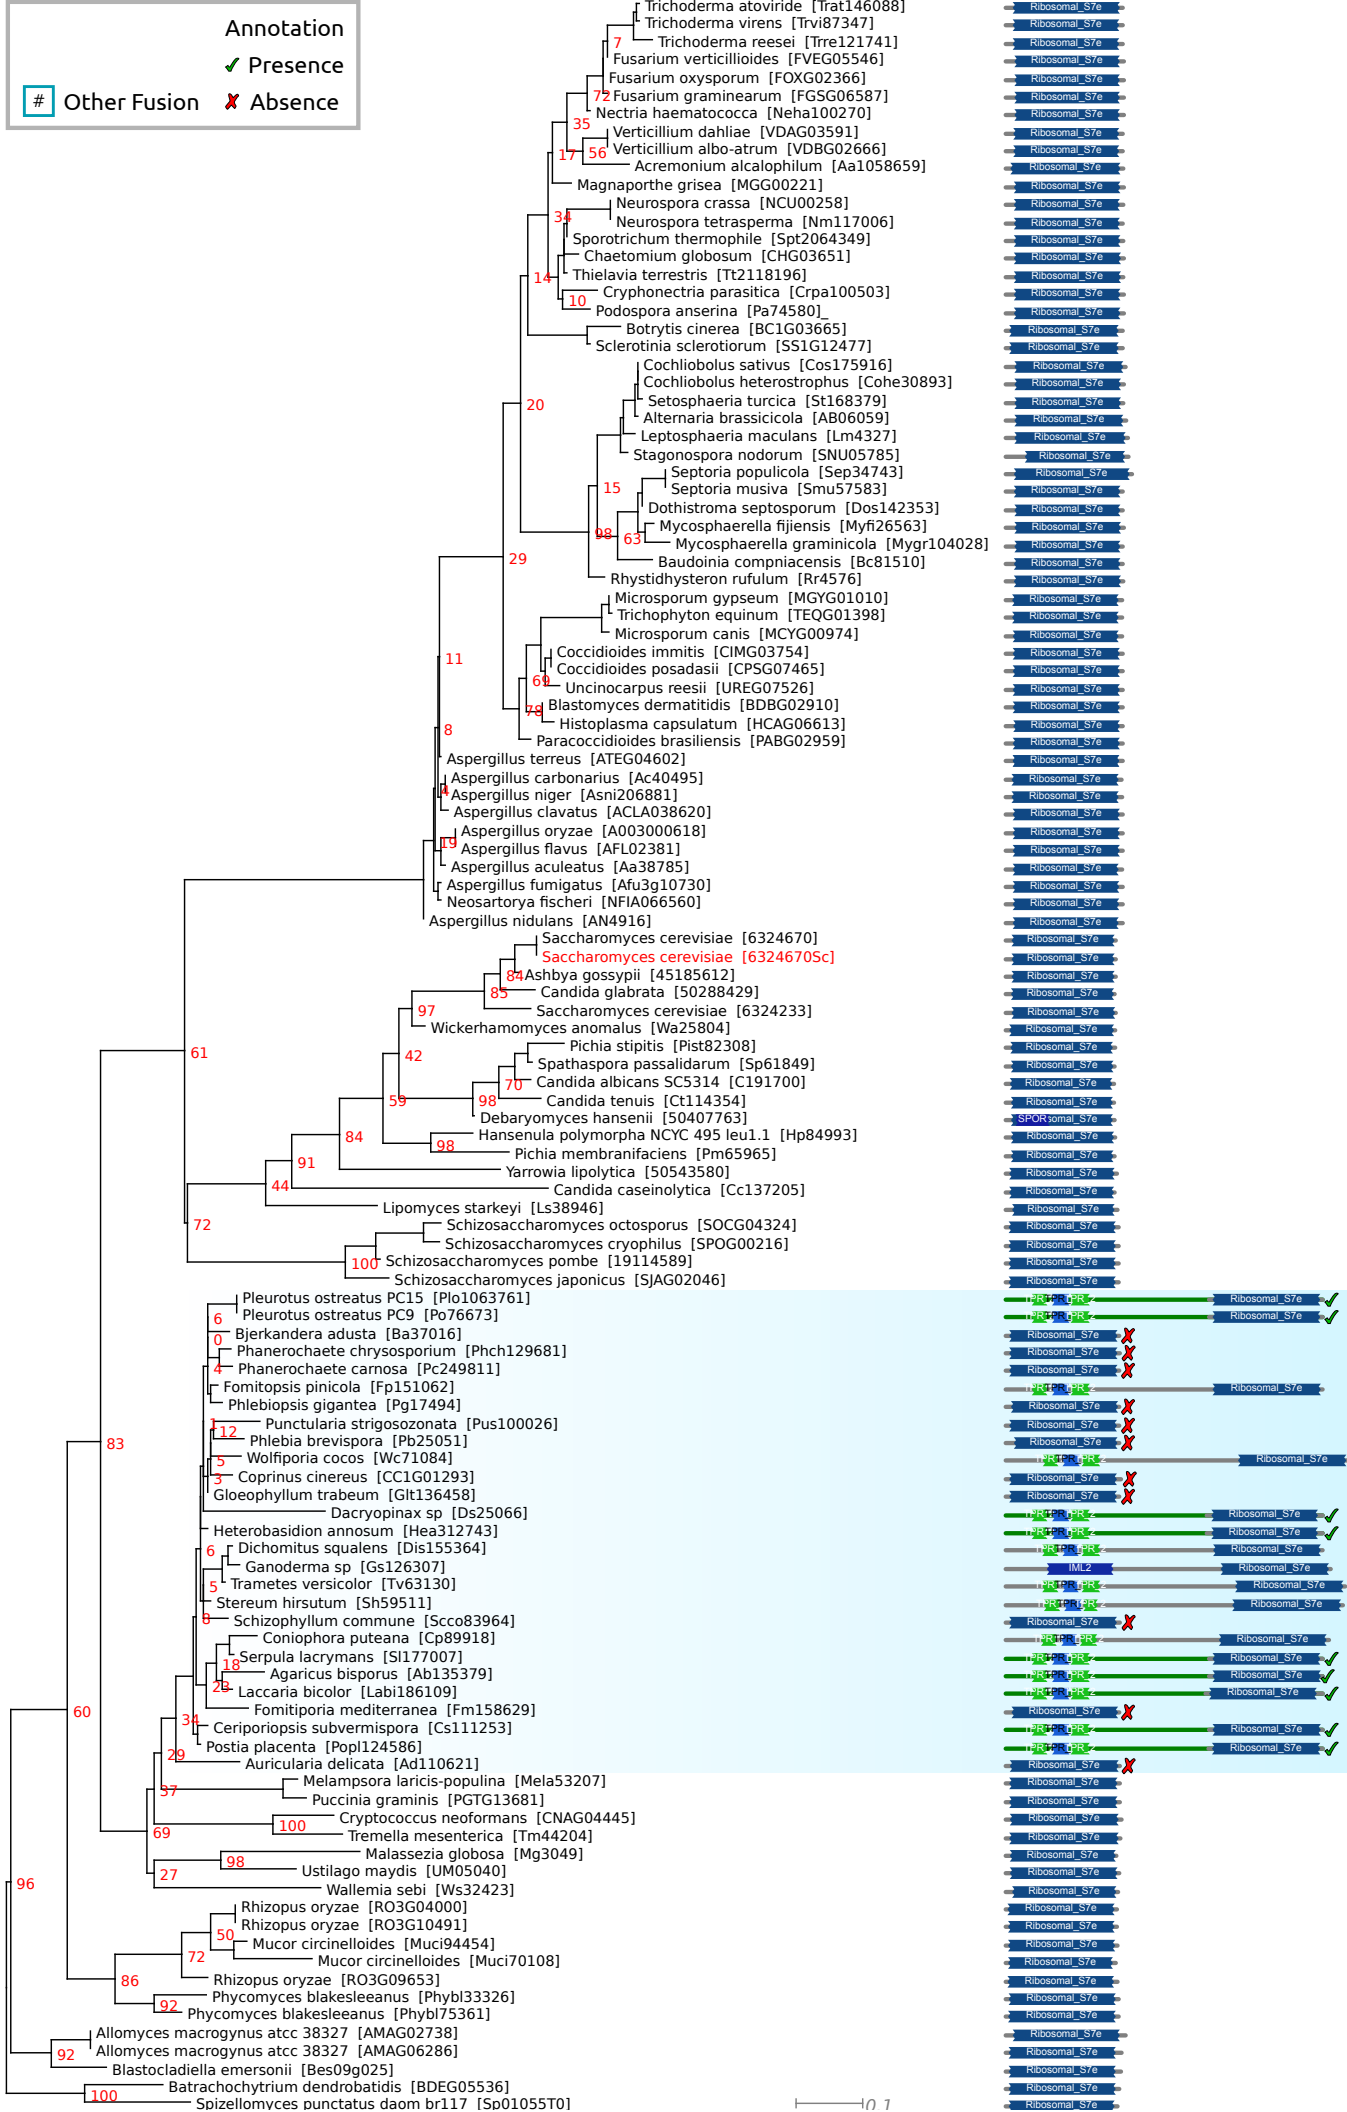

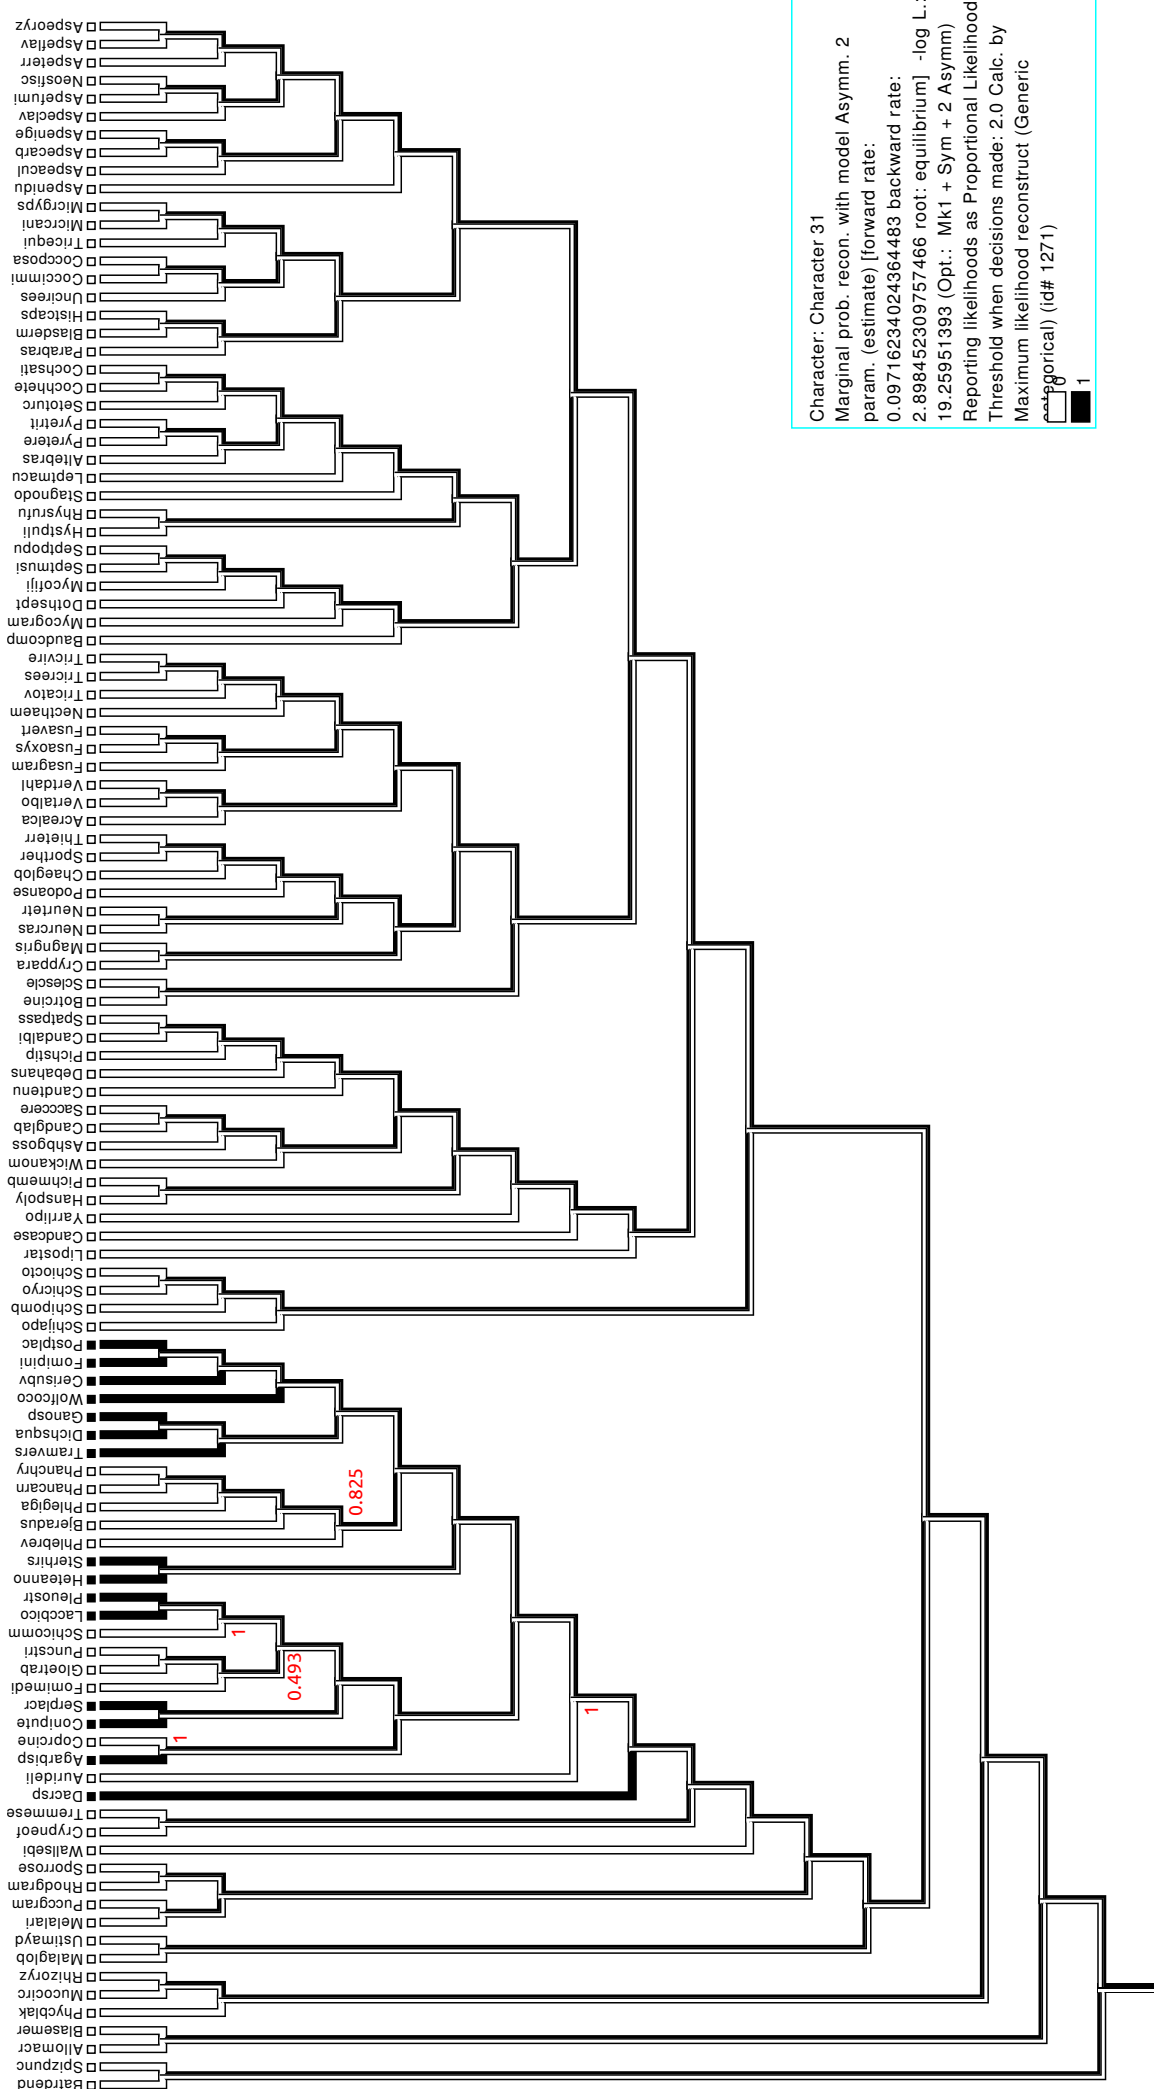

Character: Character 31  
 Marginal prob. recon. with model Asymm. 2  
 param. (estimate) [forward rate:  
 0.09716234024364483 backward rate:  
 2.898452309757466 root: equilibrium] -log L:  
 19.25951393 (Opt.: Mk1 + Sym + 2 Asymm)  
 Reporting likelihoods as Proportional Likelihoods;  
 Threshold when decisions made: 2.0 Calc. by  
 Maximum likelihood reconstruct (Generic  
 categorical) (id# 1271)

# Putative Fusion 32

September 26, 2012

## 1 Fasta Sequences

These are the unfused sequences identified by fdFBLAST belonging to the putative gene fusion in FASTA format. Accessions may be shortened, but belong to either the taxons individual genome project or NCBI's accession numbering.

```
>lcl|2624654Sc unnamed protein product
MASETFEFQAEITQLMSLIINTVYSNKEIFLRELISNASDALDKIRYKSLSDPKQLETEPDLFIRITPKPEQKVLEIRDS
GIGMTKAELINNLGTIAKSGTKAFMEALSAGADVSMIGQFGVGFYSLFLVADRVQVISKSNDDDEQYIWESNAGGSFTVTL
DEVNERIGRGTILRLFLKDDQLEYLEEKRIKEVIKRHSEFVAYPIQLVVTKEVEKEVPIP
>lcl|42543758Sc unnamed protein product
GKTKPLWTRNPSDITQEEYNFYKXISNDWEDPLYVKHFSVEGQLEFRAILFIPKRAPFDLFESKKKKNNIKLYVRRVFI
TDEAEDLIPWLSFVKGVVDSDELPLNLSREMLQNKIMKVIRKNIVKKLIEAFNEIAEDSEQFEKFYSAFSKNIKLGVH
EDTQNR AALAKLLRYNSTKSVDELTS L TDYVTRMPEHQKNIYYITGESLKAVEKSPFLDALKAKNFEVLFLTDPIDEYAF
TQLKEFEGKTLVDITKDFEL
```

## 2 Annotated Phylograms

All trees were generated from an initial run of Darren's Orchard pipeline against 139 taxa (Table S1), using the above corresponding un-fused sequences as BLAST seeds. The alignments were then checked for any missing taxa, manually masked and then ProtTest3 was run, please see the Methods section for detail. The final trees were generated by the following command:

```
phyml -i alignment_file -d aa -b 100 -m model -c 8 -v invariant_sites -s BEST --quiet
-a gamma
```

Styling and annotation was made possible by Dendroscope and Inkscape.

### 2.1 Important Notes

The original prediction made by fdFBLAST, on closer inspection (from the first round of phylogenies), indicated that there was not a gene fusion present between the above two domains but there was potentially a gene fusion with a third other domain. There is only one phylogeny here as the third domain consists of a series of repeats and so an alignment would not be possible as the resulting phylogeny would then be unresolved.

## 3 Mesquite Cladogram

This tree is the 68-gene concatenated phylogeny (Fig. 1), with the presence of a fusion (black), presence of a fission (white), and absent/undetermined (grey) status of gene fusion characters plotted on to it using a "1/0/-" nexus-style data matrix. We used the program 'Mesquite' to calculate proportional likelihoods based on either an "Mk1" or "Assym. 2 param model." (see Table S4) of character change across the fungal phylogeny (Fig. 1). This allowed for a proportional likelihood of the position of the fusion/fission to be calculated.

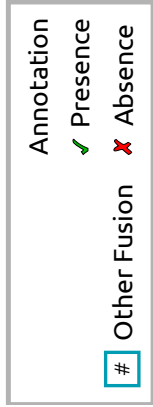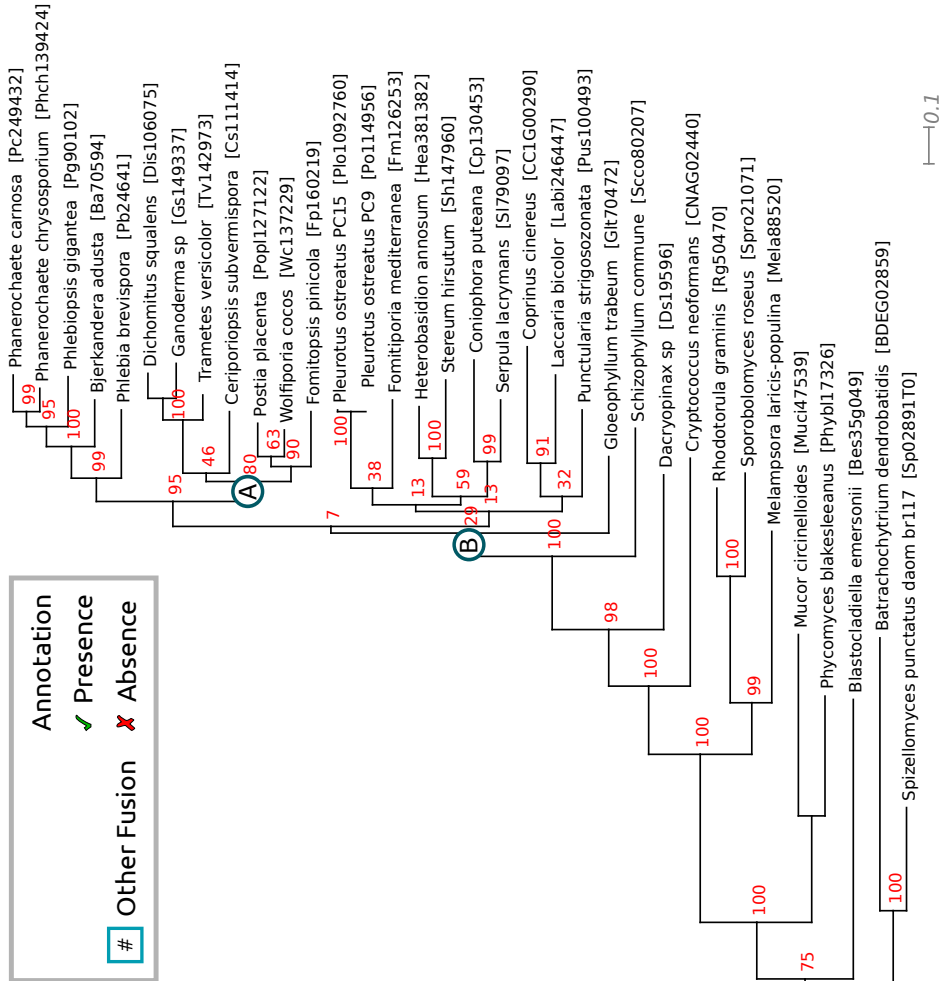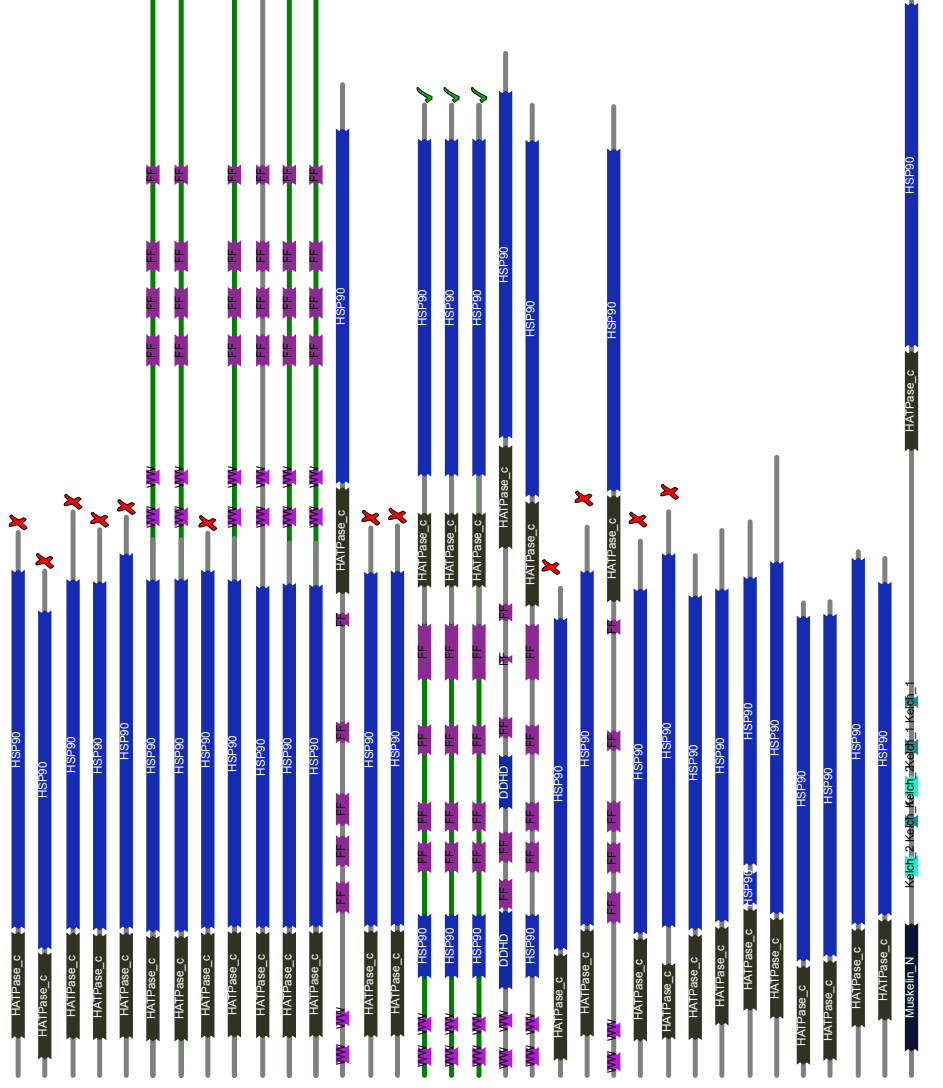

—|—0.1

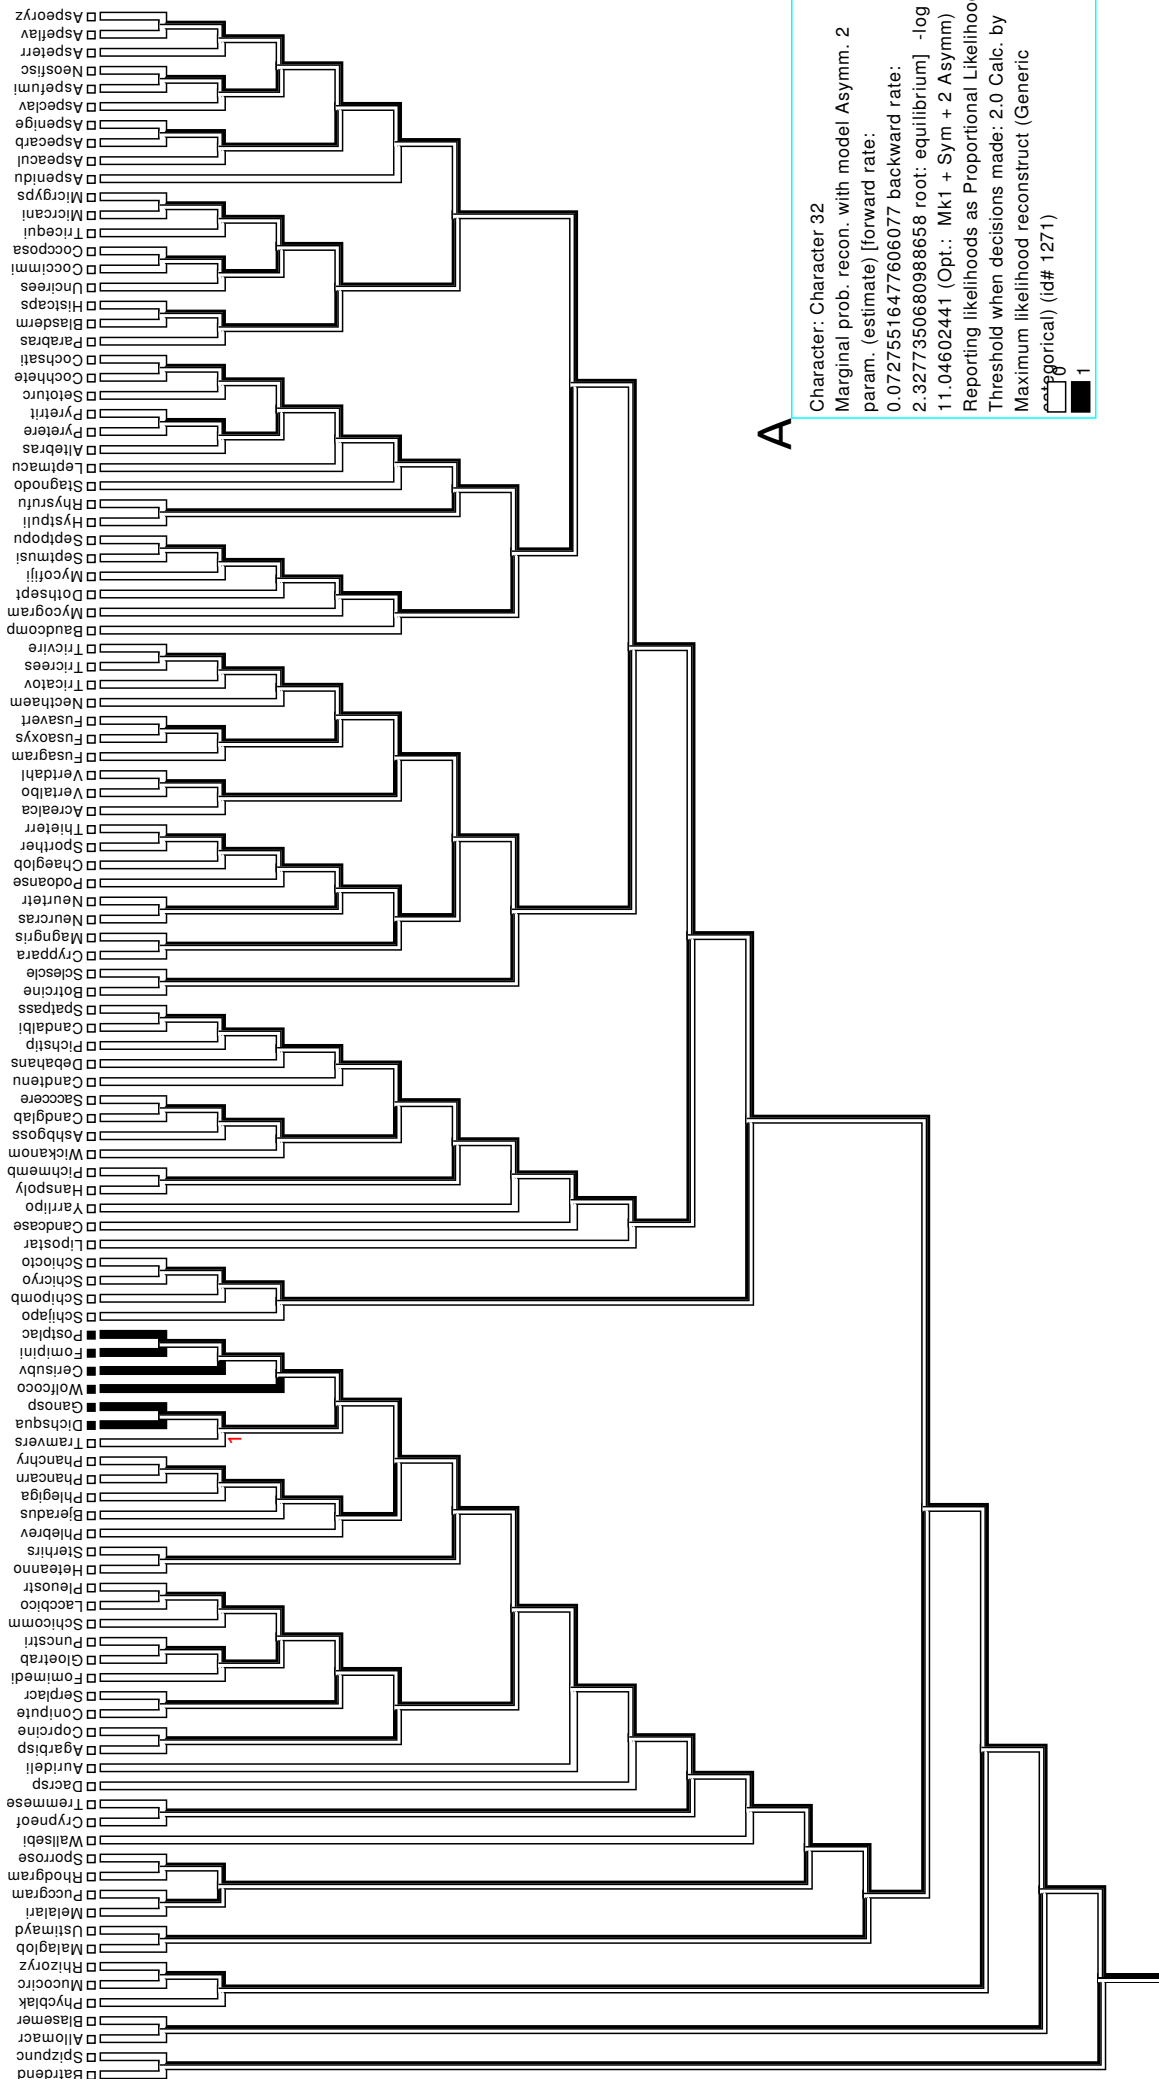

A

Character: Character 32  
 Marginal prob. recon. with model Asymm. 2  
 param. (estimate) [forward rate:  
 0.07275516477606077 backward rate:  
 2.3277350680988658 root: equilibrium] -log L.:  
 11.04602441 (Opt.: Mk1 + Sym + 2 Asymm)  
 Reporting likelihoods as Proportional Likelihoods;  
 Threshold when decisions made: 2.0 Calc. by  
 Maximum likelihood reconstruct (Generic  
 Categorical) (id# 1271)

1



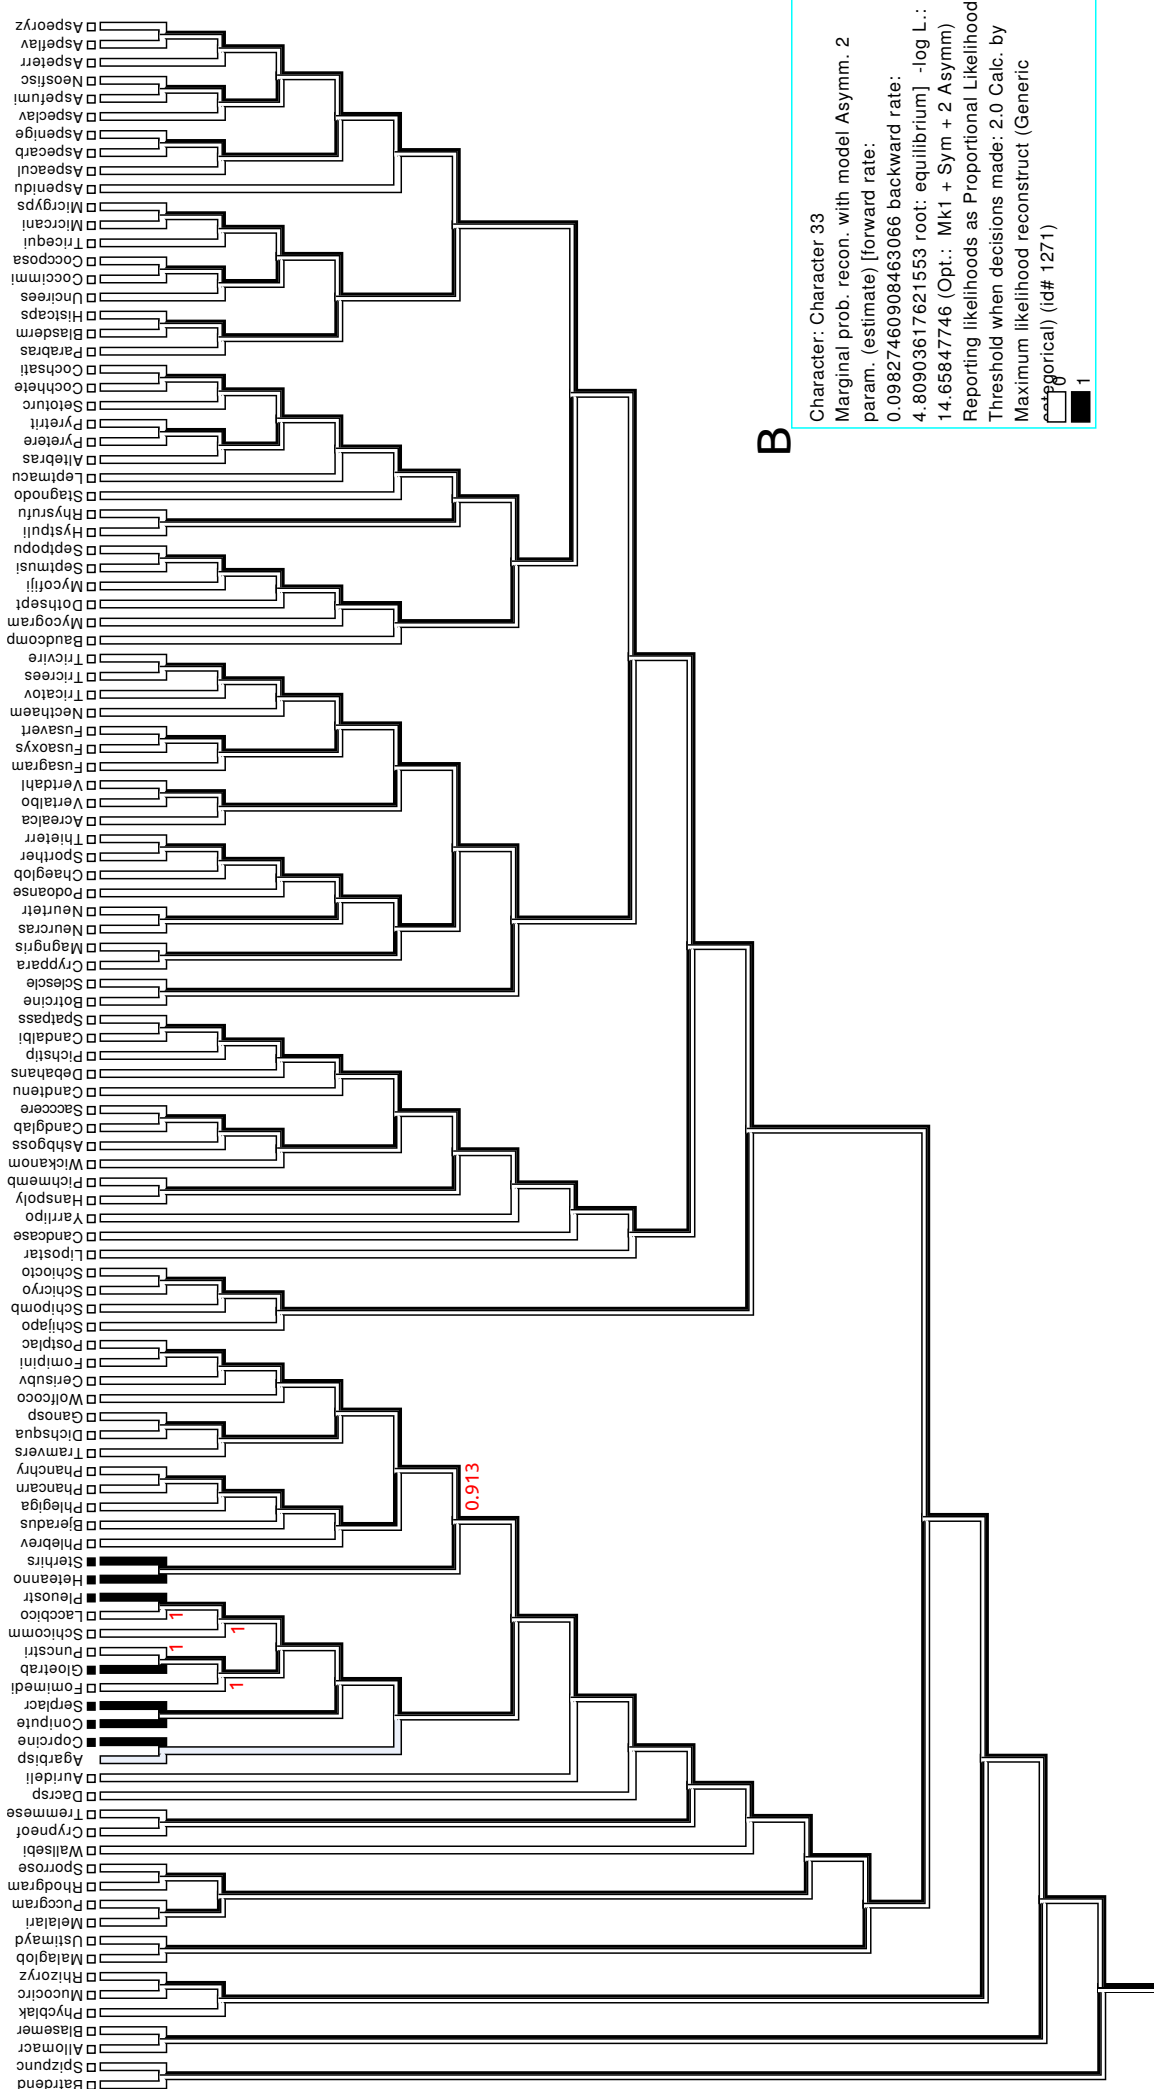

B

Character: Character 33  
 Marginal prob. recon. with model Asymm. 2  
 param. (estimate) [forward rate:  
 0.09827460908463066 backward rate:  
 4.80903617621553 root: equilibrium] -log L.:  
 14.65847746 (Opt.: Mk1 + Sym + 2 Asymm)  
 Reporting likelihoods as Proportional Likelihoods;  
 Threshold when decisions made: 2.0 Calc. by  
 Maximum likelihood reconstruct (Generic  
 categorical) (id# 1271)

1

# Putative Fusion 33

September 26, 2012

## 1 Fasta Sequences

These are the unfused sequences identified by fdFBLAST belonging to the putative gene fusion in FASTA format. Accessions may be shortened, but belong to either the taxons individual genome project or NCBI's accession numbering.

```
>lcl|Mc157300 unnamed protein product
MKLSLSIFLCVAACSHPLAVVSVAQSSPFYYQDYETSFHSEHAKQGSMVQQGRTGVAAMHAVLLNERSILIIDKAEENE
AKLDSGVSAFSSLYDIETNTYRLLLETTNTFCSAGGFLANGTFISTGGAESRGAWKAGRGHQSIRHFQPCSDSCSWVEY
PTGKMYSNRWYPTVEQLPEGLIIIGGSVAGTKYNTKEKNVPSYEFWPPRTEEPIQLDLLLHTLPY
>lcl|Mc157301 unnamed protein product
MLPLDPDNDYNVEILICGGSSSPKATSAADDTCGRINLGDEDPQWEMDTFVHKRVMPDGYKDANHDPTFDPLIYNHKKPL
GKRWTQGLASTDIARMYHSVALALPDGRLWIAGSNSVDPPDIHAKYPTEYRVEYYTPPHLYKRPEETRPRISHVPRVVTY
GQEFEILLHLQDNVKDAKKLKVAVMRPGFSTHSMMSQRYVYLRYQVDPAFETLKIMAPPNANIYPPGSAYLVVITYDGVV
CKGTEFFIEKDVNDLQI
```

## 2 Annotated Phylograms

All trees were generated from an initial run of Darren's Orchard pipeline against 139 taxa (Table S1), using the above corresponding un-fused sequences as BLAST seeds. The alignments were then checked for any missing taxa, manually masked and then ProtTest3 was run, please see the Methods section for detail. The final trees were generated by the following command:

```
phyml -i alignment_file -d aa -b 100 -m model -c 8 -v invariant_sites -s BEST --quiet
-a gamma
```

Styling and annotation was made possible by Dendroscope and Inkscape.

### 2.1 Important Notes

The original prediction made by fdFBLAST, on closer inspection (from the first round of phylogenies), indicated that there was not a gene fusion present between the above two domains but there was potentially a gene fusion with a third other domain. There is only one phylogeny included here as the first domain *Chitin\_bind* consists of a series of small noisy repeats and so an alignment would not be possible as the resulting phylogeny would appear to be unresolved.

## 3 Mesquite Cladogram

This tree is the 68-gene concatenated phylogeny (Fig. 1), with the presence of a fusion (black), presence of a fission (white), and absent/undetermined (grey) status of gene fusion characters plotted on to it using a "1/0/-" nexus-style data matrix. We used the program 'Mesquite' to calculate proportional likelihoods based on either an "Mk1" or "Assym. 2 param model." (see Table S4) of character change across the fungal phylogeny (Fig. 1). This allowed for a proportional likelihood of the position of the fusion/fission to be calculated.

Annotation  
 ✓ Presence  
 ✗ Absence

# Other Fusion

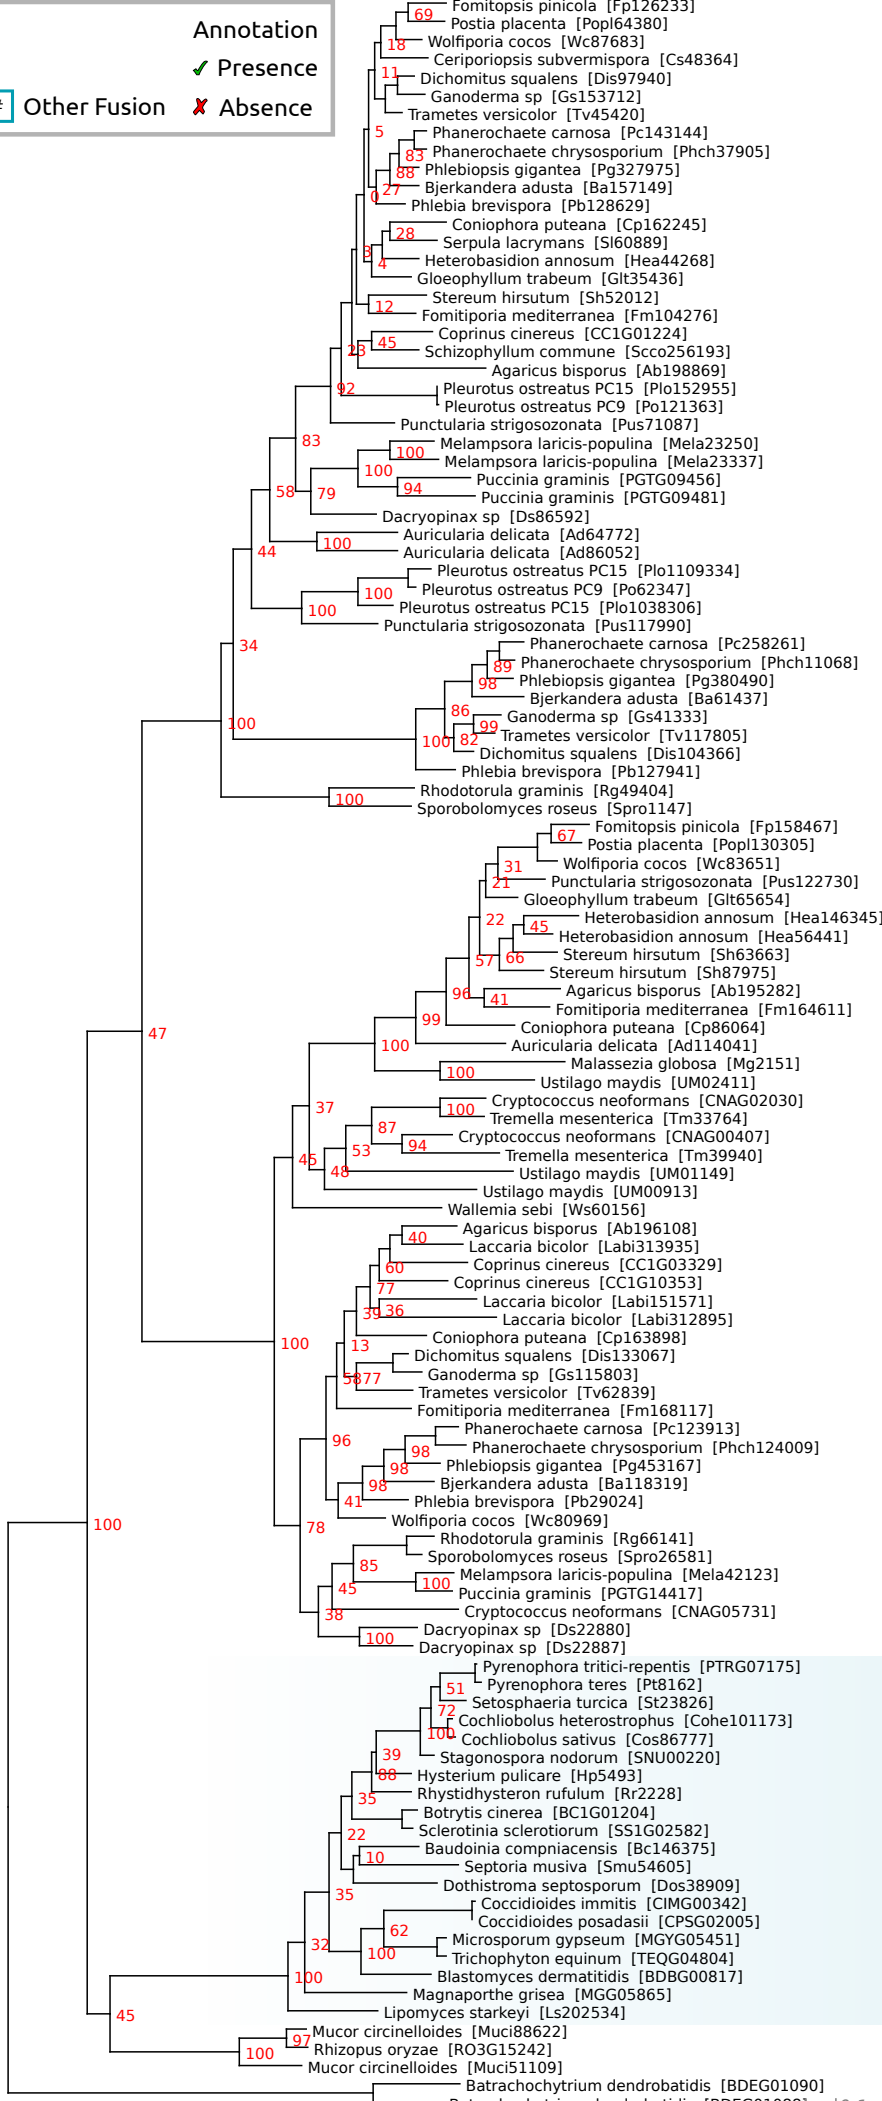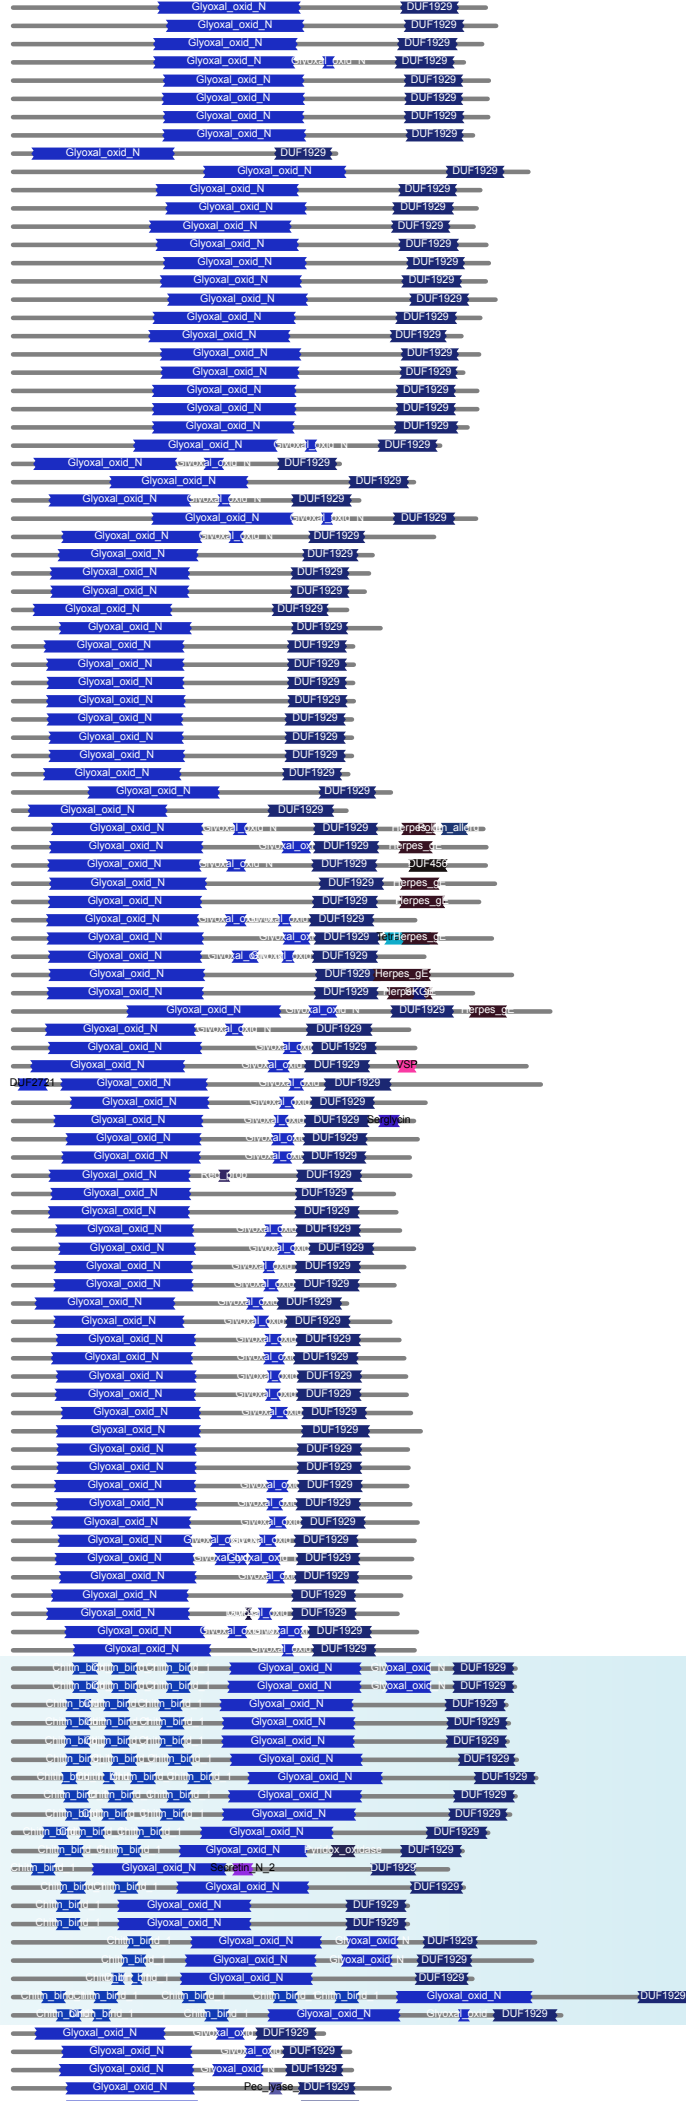



# Putative Fusion 34

September 26, 2012

## 1 Fasta Sequences

These are the unfused sequences identified by fdfBLAST belonging to the putative gene fusion in FASTA format. Accessions may be shortened, but belong to either the taxons individual genome project or NCBI's accession numbering.

```
>NP_013239_F34_dom1
MAIWEQLEVSKAHVAYACVGVFSSIFSLVSLYVKEKLYIGESTVAGIFGLIVGPVCLNWF
NPLKWGNSDSITLEITRIVLCLQIFAVAVELPRKYMLKHVSVTMLLLPVMTAGWLIIGL
FVWILIPGLNFSASLLISACITATDPILAQS VVSGKFAQRVPGHLRNLLSAESGCNDGMA
FPFLFLSMNLILHPGNGREIVKDWICVTILYECLFGCLLGCFIGYVGRITIRFAEKKNI
DRESFLAFYVVLAFMCAGFGSILGVDDLLVSFAAGATFAWDGWFSQKTQESNVSTVIDLL
LNYAYFIYFGAIIIPWSQFNNGEIGTNVWRLIILSIVVIFLRRIPAVMILRPLIPDIKSWR
EALFVGHFGPIGVGAIFAAILARGELESTFSDEPTPLNVVPSKEESKHWQLIACIWPITC
>NP_013239_F34_dom2
FFIVTSIIIVHGSSVAIITLGRHLNTITLTKTFTTHTTNGDNGKSSWMQRLPSLDKAGRSF
SLHRMDTQMTLSGDEGEAEEGGGRKGLAGGEDEEGLNNDQIGSVATSGIPARPAGGMPPR
RKLRSRKEKRLNRRQKLRNKGREIFSSRSKNEMYDDELNDLGRERLQKEKEARAATFALS
TAVNTQRNEEIGMGDEEEDEYTPKEYS DNYNNTPSFESSERSSSLRGRTYVPRNRYDG
EETESEIESEDEMENESERSMASSEERRIRKMKEEEMKPGTAYLDGNRMIIENKQGEILN
QVDIEDRNEARDDEVSVDSTAHSSTTTMTNLSSSSGGRLKRILTPTSLGKIHSLVDK GK
DKNKNSKYHAFKIDNLLIENEDGDVIKRYKINPHKSDDD KSKNRPRNDSVVSRAALTAVG
LKSKANSGVPPPVD E EKAIEGPSRKGPGMLKKRTLTPAPPRGVQDSDLDEEPSSEEDLG
DSYNMDDSEDYDDNAYESETEFERQRLNALGEMTAPADQDDEELPPLPVEAQTGNDGPG
TAEGKKKQKSAAVKSALS KTLGLNK
```

## 2 Annotated Phylograms

All trees were generated from an initial run of Darren's Orchard pipeline against 139 taxa (Table S1), using the above corresponding un-fused sequences as BLAST seeds. The alignments were then checked for any missing taxa, manually masked and then ProtTest3 was run, please see the Methods section for detail. The final trees were generated by the following command:

```
phymml -i alignment_file -d aa -b 100 -m model -c 8 -v invariant_sites -s BEST --quiet -a gamma
```

Styling and annotation was made possible by Dendroscope and Inkscape.

### 2.1 Important Notes

Sequences similar to Nha1\_C domain are only present in ascomycete genomes so we did not conduct a phylogeny as this data would be uninformative for polarising ancestry of this gene fusion.

## 3 Mesquite Cladogram

This tree is the 68-gene concatenated phylogeny (Fig. 1), with the presence of a fusion (black), presence of a fission (white), and absent/undetermined (grey) status of gene fusion characters plotted on to it using a "1/0/-" nexus-style data matrix. We used the program 'Mesquite' to calculate proportional likelihoods based on either an "Mk1" or "Assym. 2 param model." (see Table S4) of character change across the fungal phylogeny (Fig. 1). This allowed for a proportional likelihood of the position of the fusion/fission to be calculated.

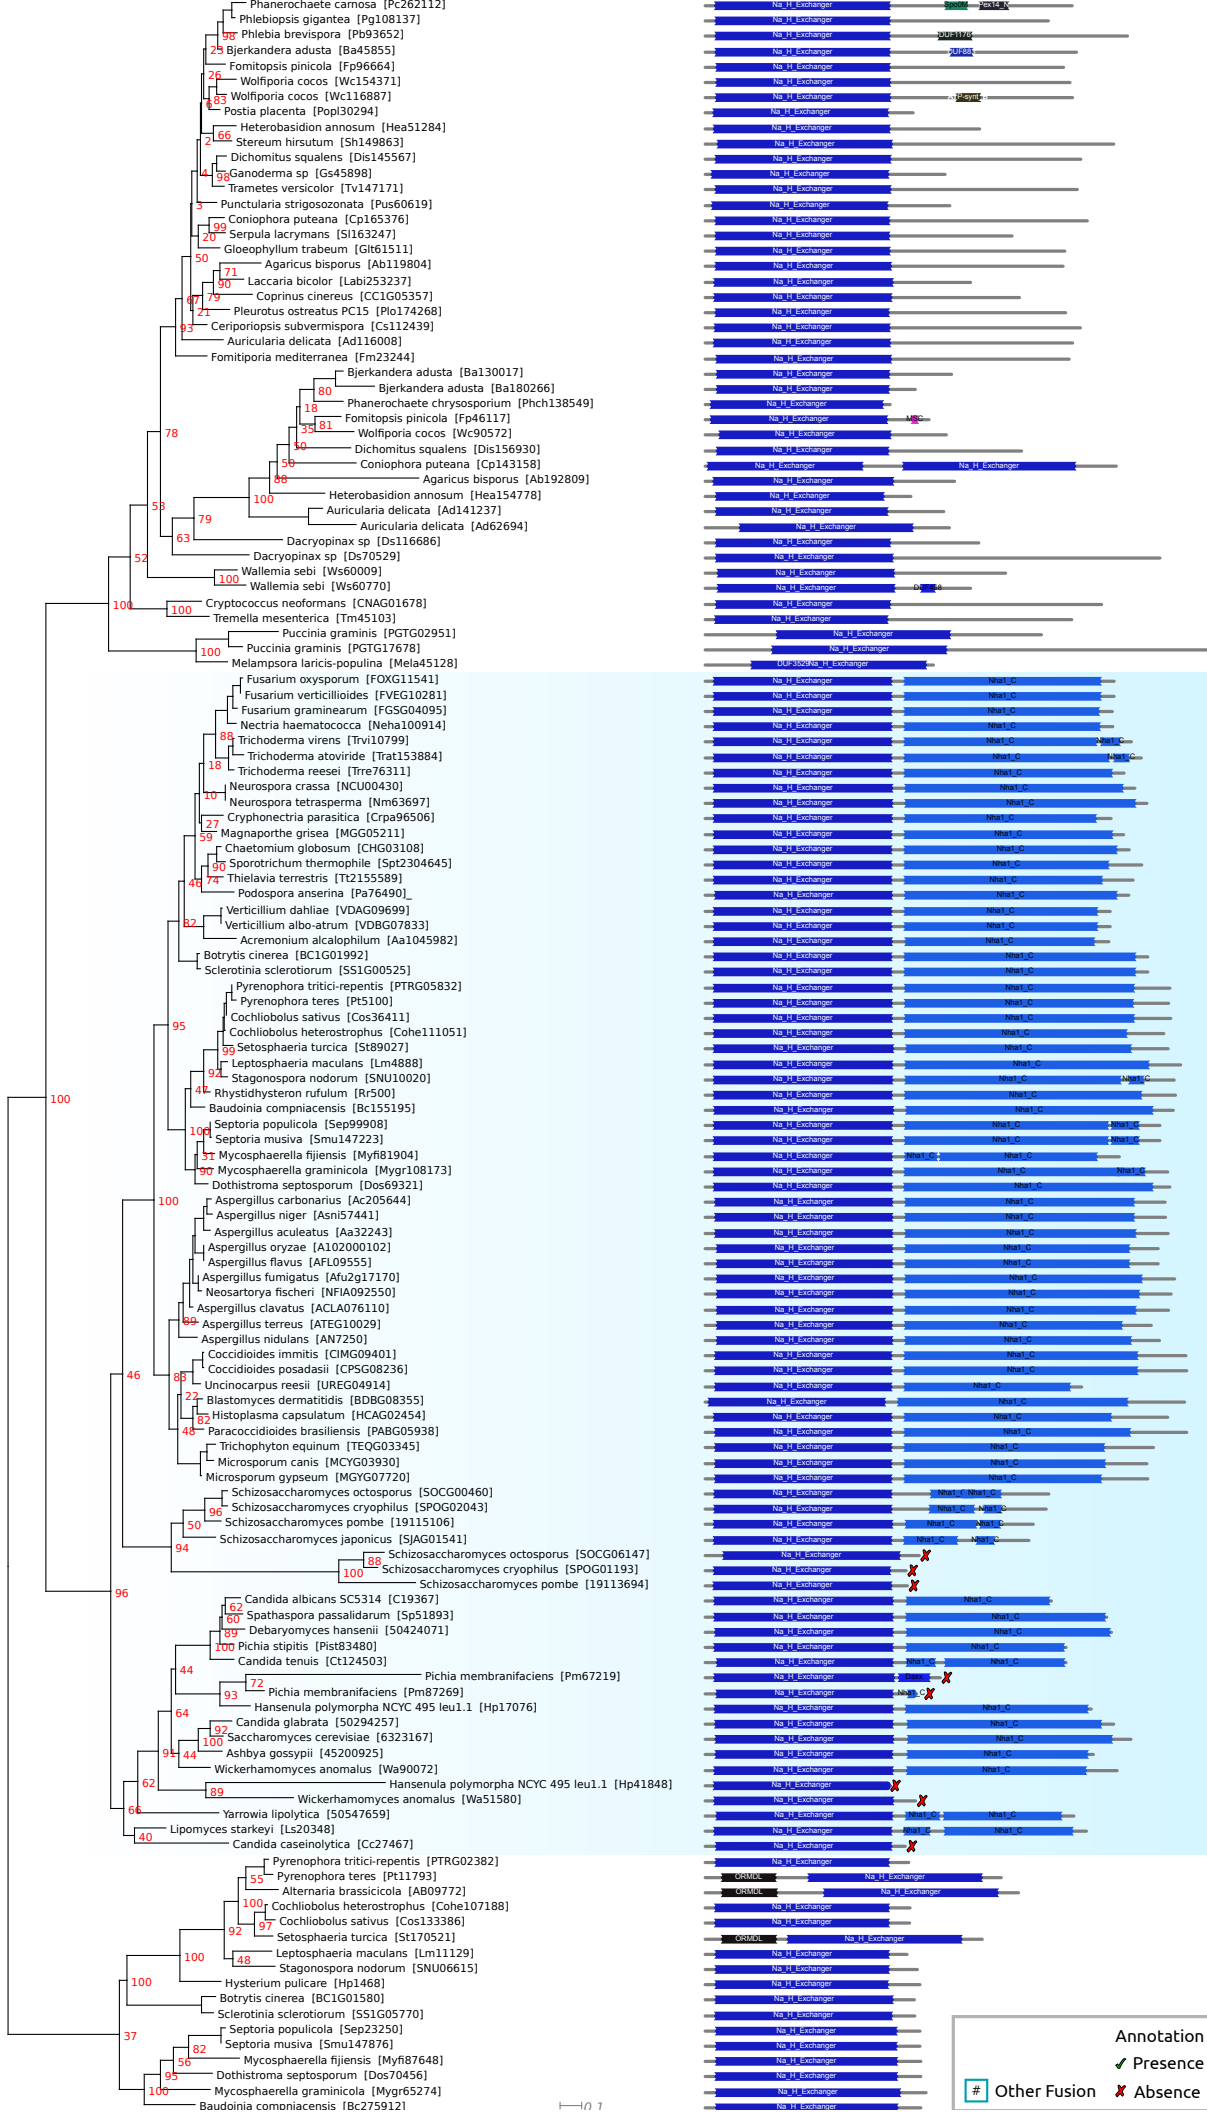





# Putative Fusion 35

September 26, 2012

## 1 Fasta Sequences

These are the unfused sequences identified by fdfBLAST belonging to the putative gene fusion in FASTA format. Accessions may be shortened, but belong to either the taxons individual genome project or NCBI's accession numbering.

```
>gi|302414152|ref|XP_003004908.1| WSC domain-containing protein [Verticillium albo-at:  
MTNEVCATFCASRGFAYAGTEWYQECYCGNALAVGGVIANELDCNTPCAGDTTQPCGGPNRLTLFFTEEA  
NGPSVNPVGWVSEGCYTDGAGGRTLSTNGIGSIPASEMTVAKCLAACRAGNYKLGGEVYGGECYCDNSL  
KNGGAPAVDGCNMLCNGNTTEYCGGPNNLNYNYKEVVDVSSTVTTTPEPTGTASVIETVLPSTITPTG  
PSPHETVGPYSWVGCRTATGARALGAKELANDQMTLETCTFCTGYKYFGTEYGRECFGNTFAAGSQT  
APESDCSMRCSGSPQQYCGAGNRLSVYMLDEGGSPASSAVTSGAATSDAGVASAVSTSTSTARSVPATGY  
PSGWSEQGCWVDGAGGRILTHQVPDDNALTLQKCAKCCFDLGYTVAGAEYYQQCFGNAIINNGVKASSD  
SQCNTPCAGDSTQMCGGGDRMTIISDGPPRVRGPPSPQLSGFNGDWTYQGCLQSFVGTTRFFWQNFPPG  
TMTANECLDRCGEFGYMAAGLEYGEECYCGDPANIDTIGTVFRPESECNILCAGNDSSICGGGNRMSTYF  
WTGTPLYAWTFPQDVARAGSYELLIGVCIPLMTMESITGKVTFLKWTGTPANSTGAYELDSLTPNRN  
TAWREMNKTDIFCSSGLILPDKAGRQLTVGGWSGDSTYGVRLYTPDGSPGVNGTNDWEENVNQLSLQDG  
RWYPTTMIMANGSIFVIGGEEGNSGAAPTIEVLPTGRAPLFDWLERTDPNNLYPFCVLPSENIFFVA  
YWNARILDKTTFFETLTLPTIPGTVNNPMGGRTYPLEGTGVLLPQKAPYTAPLGILICGGSTEGVATAI  
DNCVTIYPEAPEPEWVIERMPSRRVMSCMAPLPDGYLINNGAQGGVAGFGLAEFPNLNALIYDPEKRVG  
ARITVVANTTIARLYHSEITLLDGRVLTGSDPQDGVNPPQYRVEVFNPPYLTSGKPRPTFTLANRDWD  
YDESITFTLGSAPVNGAISVTLGGVSSSTHGNSMGTRTILPSVSCSGLTCTVTAPPDAGICPPGWFFV  
LDGGIPAVGVYVRIGGDPaelgnwPDKSSFSPPGL
```

## 2 Annotated Phylograms

All trees were generated from an initial run of Darren's Orchard pipeline against 139 taxa (Table S1), using the above corresponding un-fused sequences as BLAST seeds. The alignments were then checked for any missing taxa, manually masked and then ProtTest3 was run, please see the Methods section for detail. The final trees were generated by the following command:

```
phyml -i alignment_file -d aa -b 100 -m model -c 8 -v invariant_sites -s BEST --quiet  
-a gamma
```

Styling and annotation was made possible by Dendroscope and Inkscape.

### 2.1 Important Notes

There is only one phylogeny here as one domain consists of a series of repeats and so an alignment would not be possible as the resulting phylogeny would then be unresolved.

## 3 Mesquite Cladogram

This tree is the 68-gene concatenated phylogeny (Fig. 1), with the presence of a fusion (black), presence of a fission (white), and absent/undetermined (grey) status of gene fusion characters plotted on to it using a "1/0/-" nexus-style data matrix. We used the program 'Mesquite' to calculate proportional likelihoods based on either an "Mk1" or "Assym. 2 param model." (see Table S4) of character change across the fungal phylogeny (Fig. 1). This allowed for a proportional likelihood of the position of the fusion/fission to be calculated.

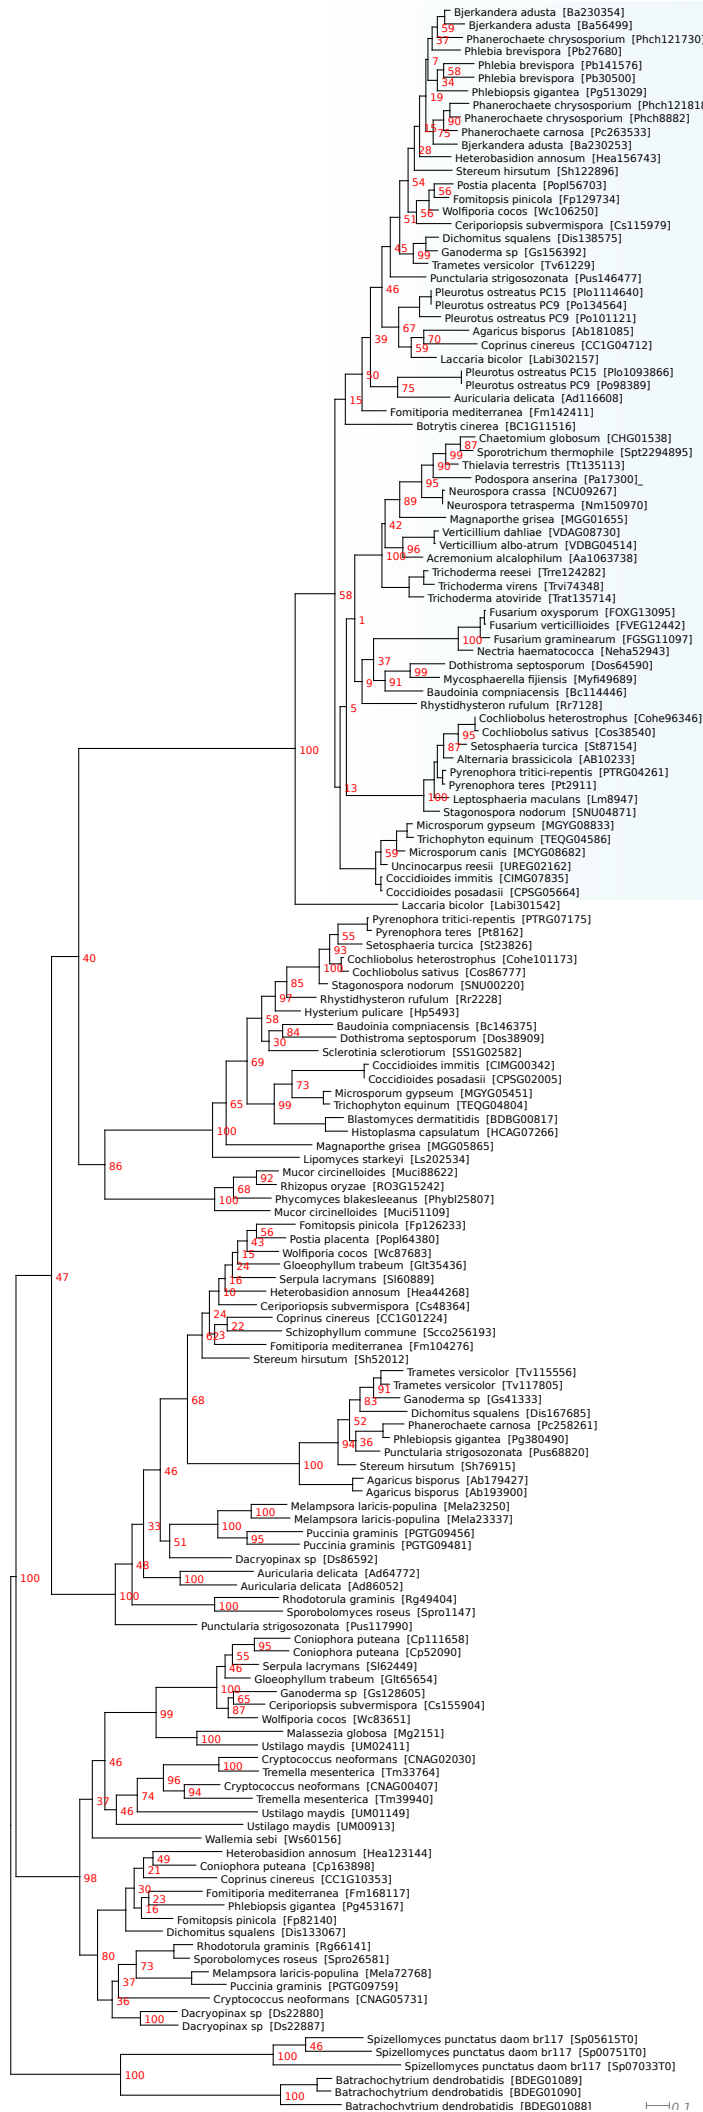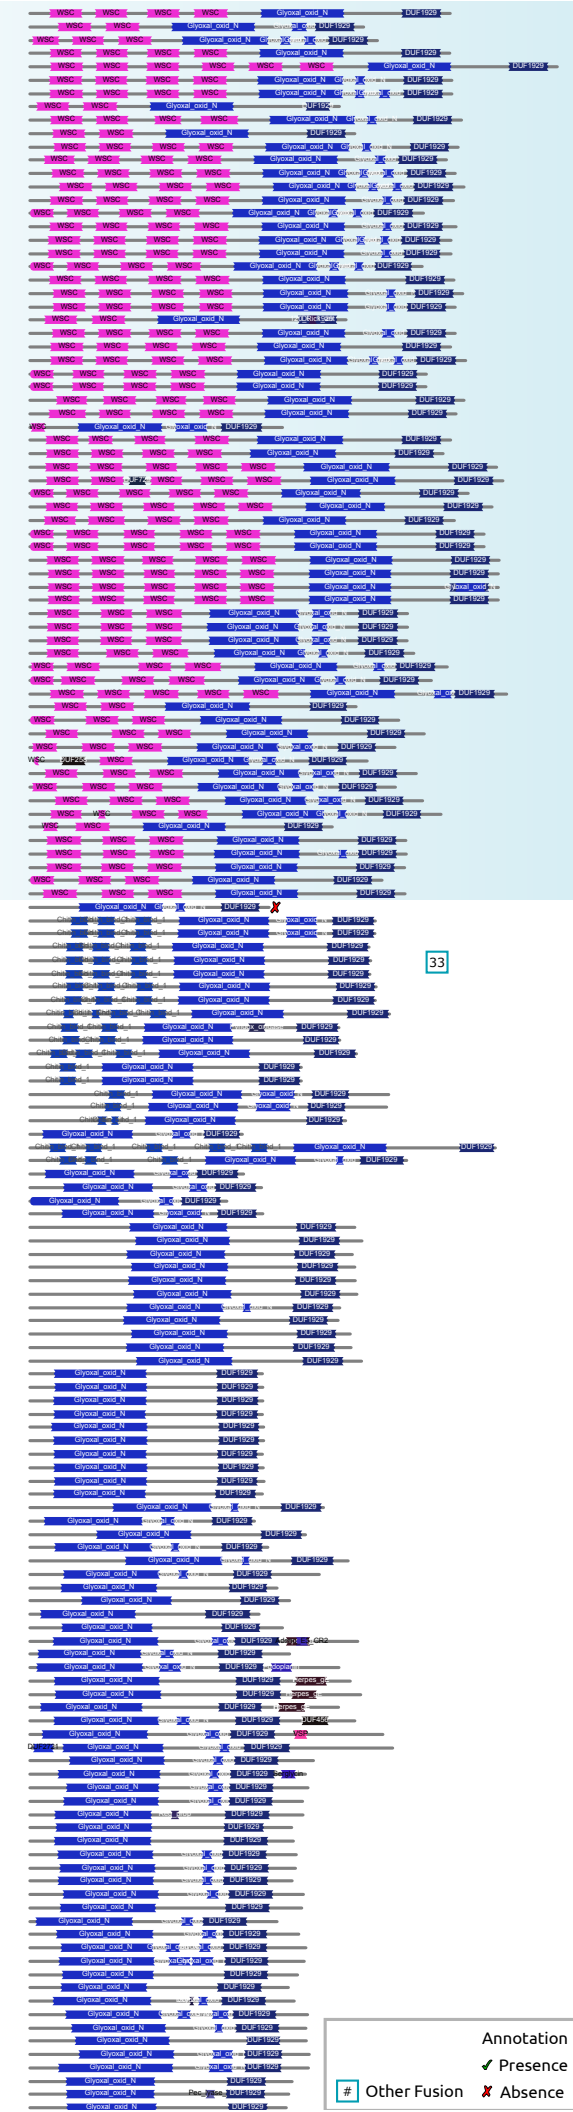

Annotation

- ✓ Presence
- ✗ Absence

# Other Fusion

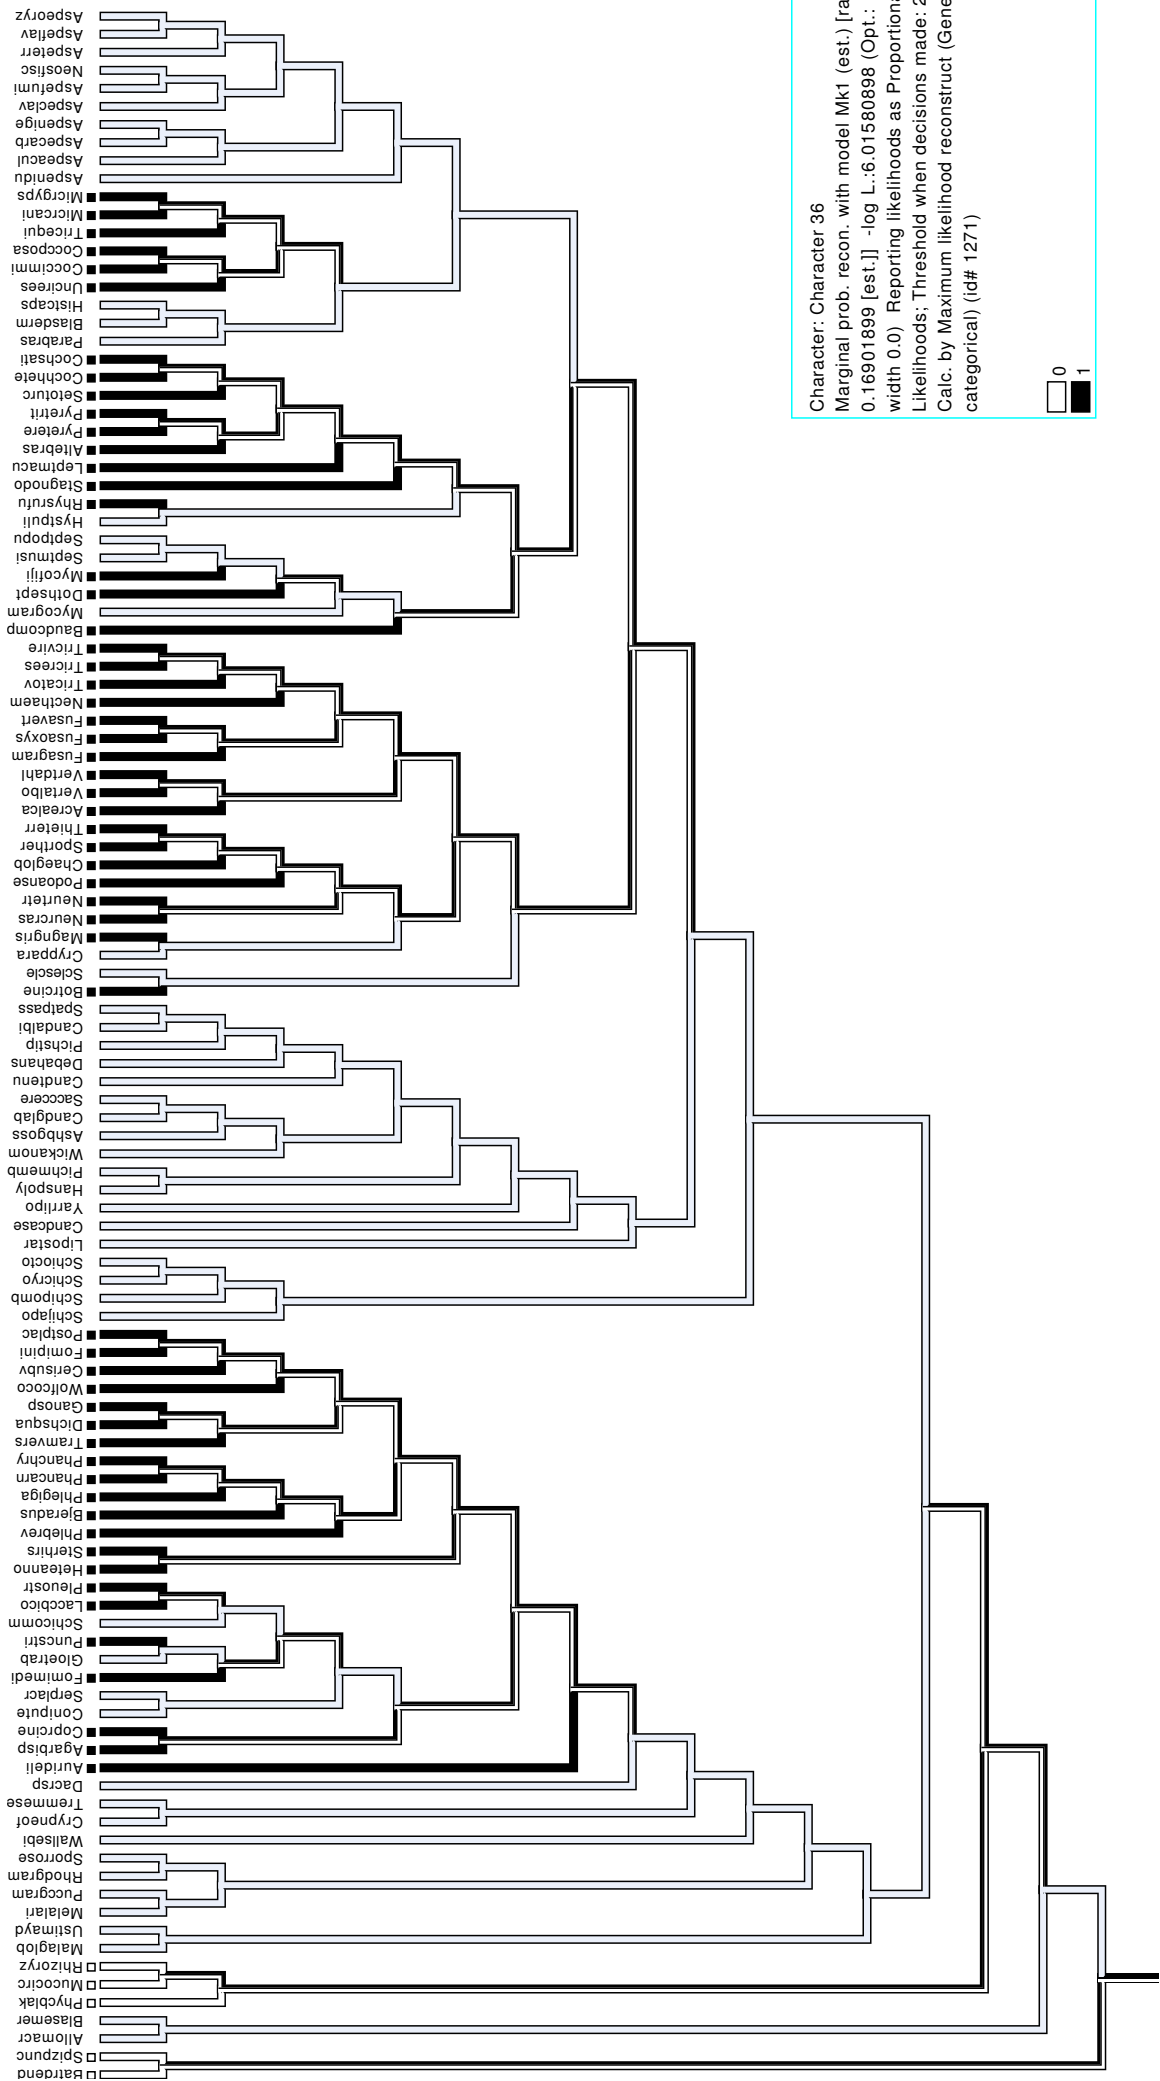

Character: Character 36  
 Marginal prob. recon. with model Mk1 (est.) [rate  
 0.16901899 [est.]] -log L.:6.01580898 (Opt.:  
 width 0.0) Reporting likelihoods as Proportional  
 Likelihoods; Threshold when decisions made: 2.0  
 Calc. by Maximum likelihood reconstruct (Generic  
 categorical) (idf# 1271)



# Putative Fusion 36

September 26, 2012

## 1 Fasta Sequences

These are the unfused sequences identified by fdfBLAST belonging to the putative gene fusion in FASTA format. Accessions may be shortened, but belong to either the taxons individual genome project or NCBI's accession numbering.

```
>gi|242209591|ref|XP_002470642.1| predicted protein [Postia placenta Mad-698-R]
MAPKSDWEKWEKKADDKDEKEIKGTLIYPLSLDMLTEVQPSTTGQGPYAQKLKKIENDIKDAQKRVNEK
LGIKESDTGLAAPNLWDLAVDRQRMGEEHPLQVARCTKIIPMNQEAAAAARAVNPQGALQGQKGADEQDK
YVINIKQIAKFVVLGDRVAPTDIEEGMRVGVDRNKYQIQIPLPPKIDASVTMMQVEEKPDVTYSVGGC
KEQIEKLRVVETPLLSPERFVNLGIDPPKGVLLFGPPGTGKTLCARAVANRTDATFIRVIGSELVQKYV
GEGARMVRELFEMARSKKACIIFDEVDAIGGARFDDGAGGDNEVQRTMLELINQLDGFDPGRNIKVLMA
TNRPDTLDPALLRPGRLDRRVEFSLPDVEGRASILRIHARSMSCERDIRFDLIARLCPNTTGAELRSVAT
EAGMFAIRARRKVATERDFLDAVEKVVVRQGTKFSSTDYEDGGISAAELSRMEEHAEQPPRPLTLSTLLS
LADPVTPESVLTSVRYVTNEIPRRMAMRARSLEALPYIVGMNPFARTLEAYRKSFRFLTTYPPVQTLED
NQLRTAELDGLVQSHANDIPTMAKGFQECARYLTPEQISTFLDEAIRNRIAVRLIAEQHIAISRALEEGG
DLKDHHGVVHLSCSPQDMIRMCGSWVSDLCBATLGAHPEI IIDGEVDATFAYVVPVHLEYILTEILKNAFR
ATVERHARQPSSIRTSPVPPVRITISPPPLTPIPRPRFLSMRVRDQGGGVSPAHLAQIFSYSFTTAGRAT
TSPGGGVGWDDQETGGGPYAAQHVGGSAIIGGIDSMGGAGGLFAEMTGRGVQVGMGTIAGLGYGLPMSRL
YTRYFGGSLDLMSLDGWGCDVFLKLRCLDDAGDVEI
```

## 2 Annotated Phylograms

All trees were generated from an initial run of Darren's Orchard pipeline against 139 taxa (Table S1), using the above corresponding un-fused sequences as BLAST seeds. The alignments were then checked for any missing taxa, manually masked and then ProtTest3 was run, please see the Methods section for detail. The final trees were generated by the following command:

```
phyml -i alignment_file -d aa -b 100 -m model -c 8 -v invariant_sites -s BEST --quiet
-a gamma
```

Styling and annotation was made possible by Dendroscope and Inkscape.

## 3 Mesquite Cladogram

This tree is the 68-gene concatenated phylogeny (Fig. 1), with the presence of a fusion (black), presence of a fission (white), and absent/undetermined (grey) status of gene fusion characters plotted on to it using a "1/0/-" nexus-style data matrix. We used the program 'Mesquite' to calculate proportional likelihoods based on either an "Mk1" or "Assym. 2 param model." (see Table S4) of character change across the fungal phylogeny (Fig. 1). This allowed for a proportional likelihood of the position of the fusion/fission to be calculated.

Annotation

✓ Presence

# Other Fusion ✗ Absence

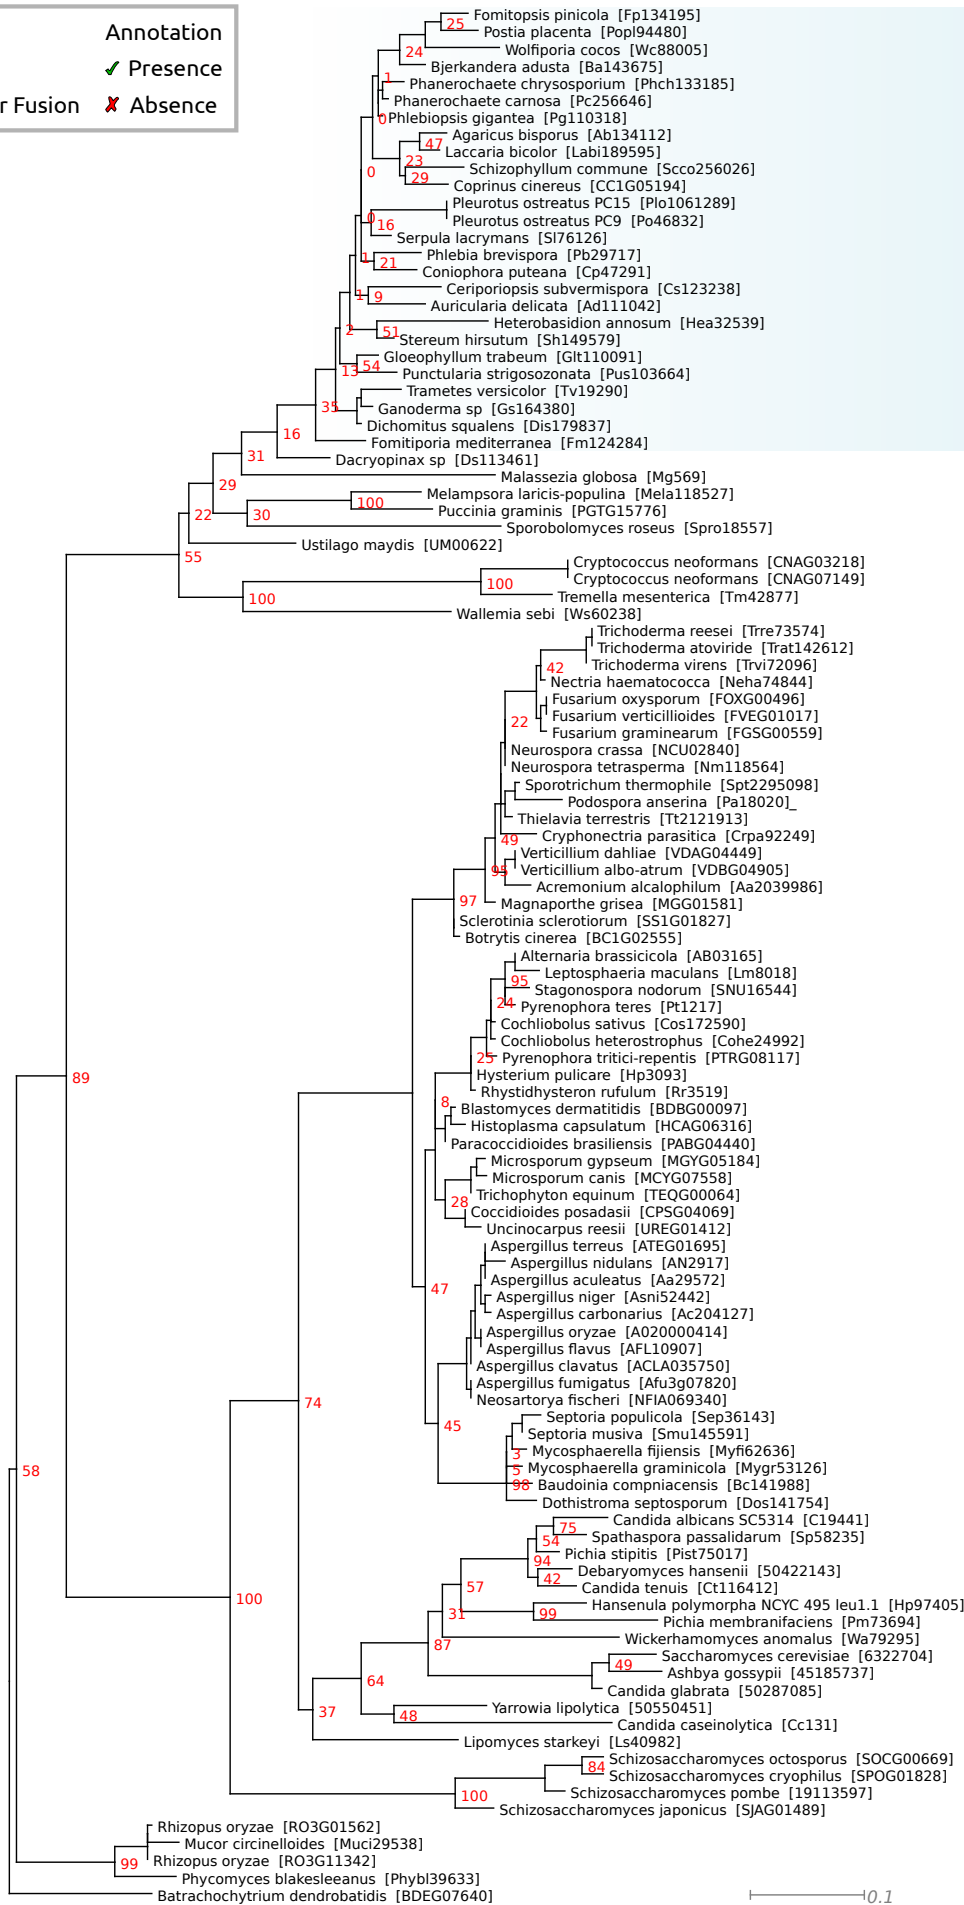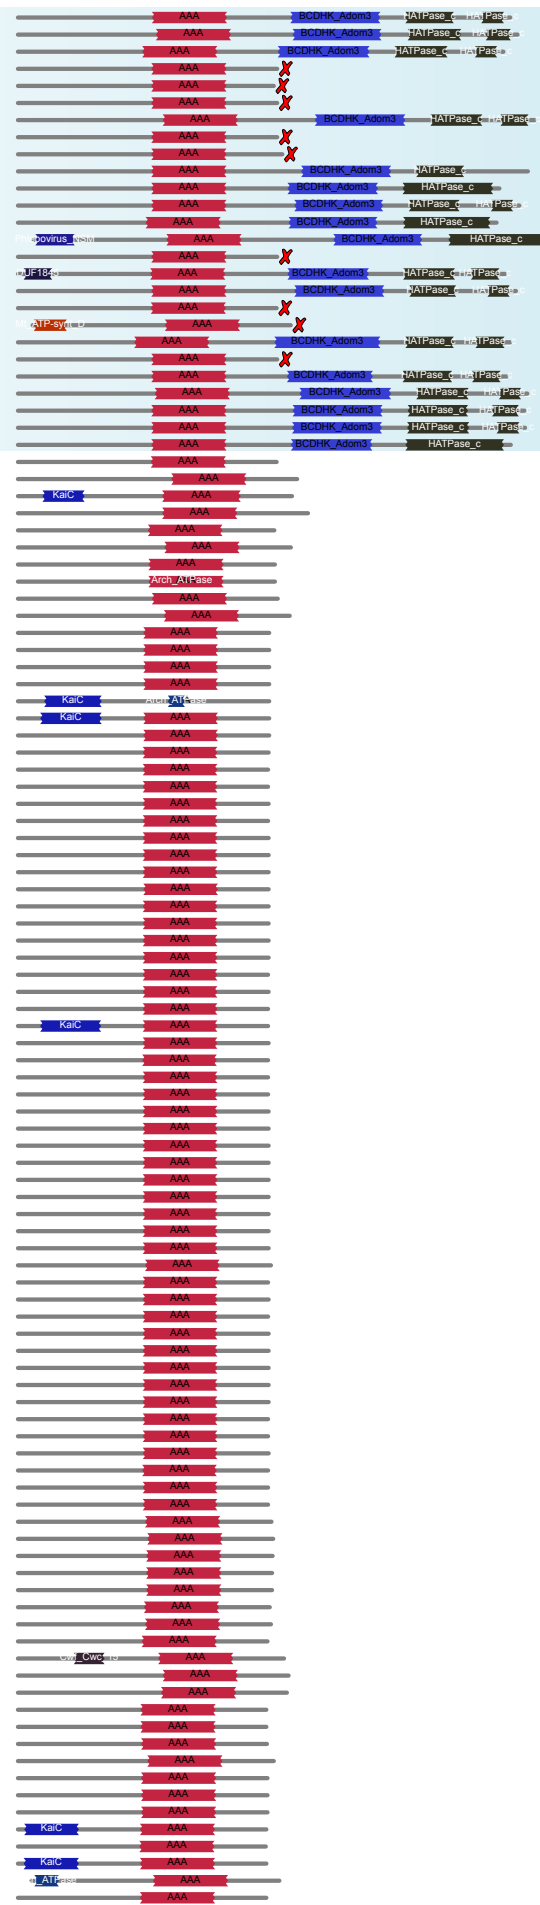

0.1

**Annotation**  
 ✓ Presence  
 ✗ Absence  
 # Other Fusion

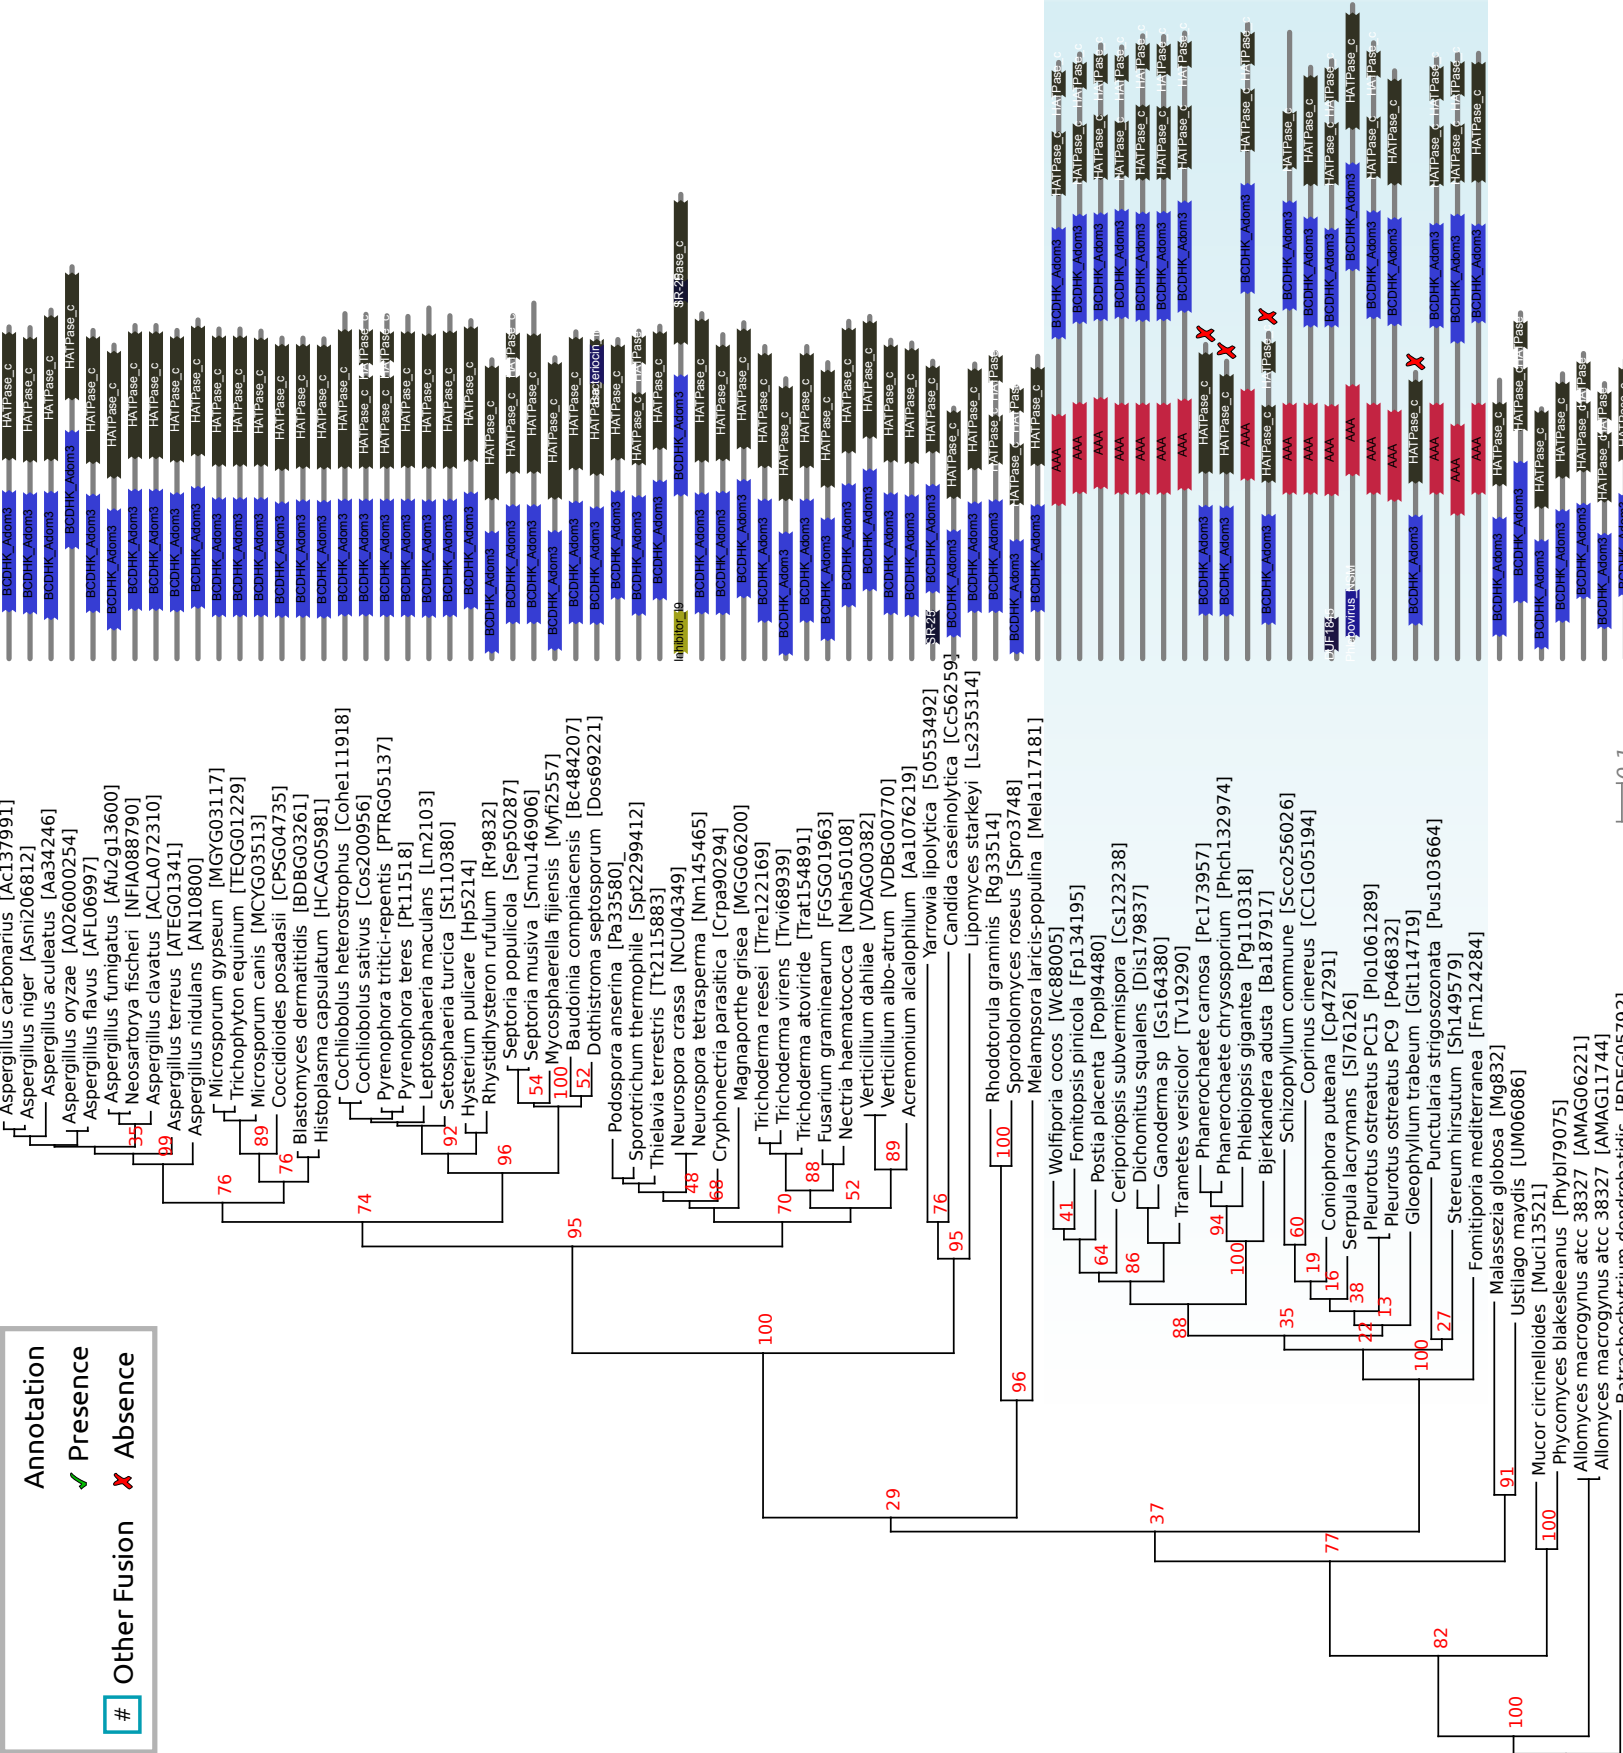

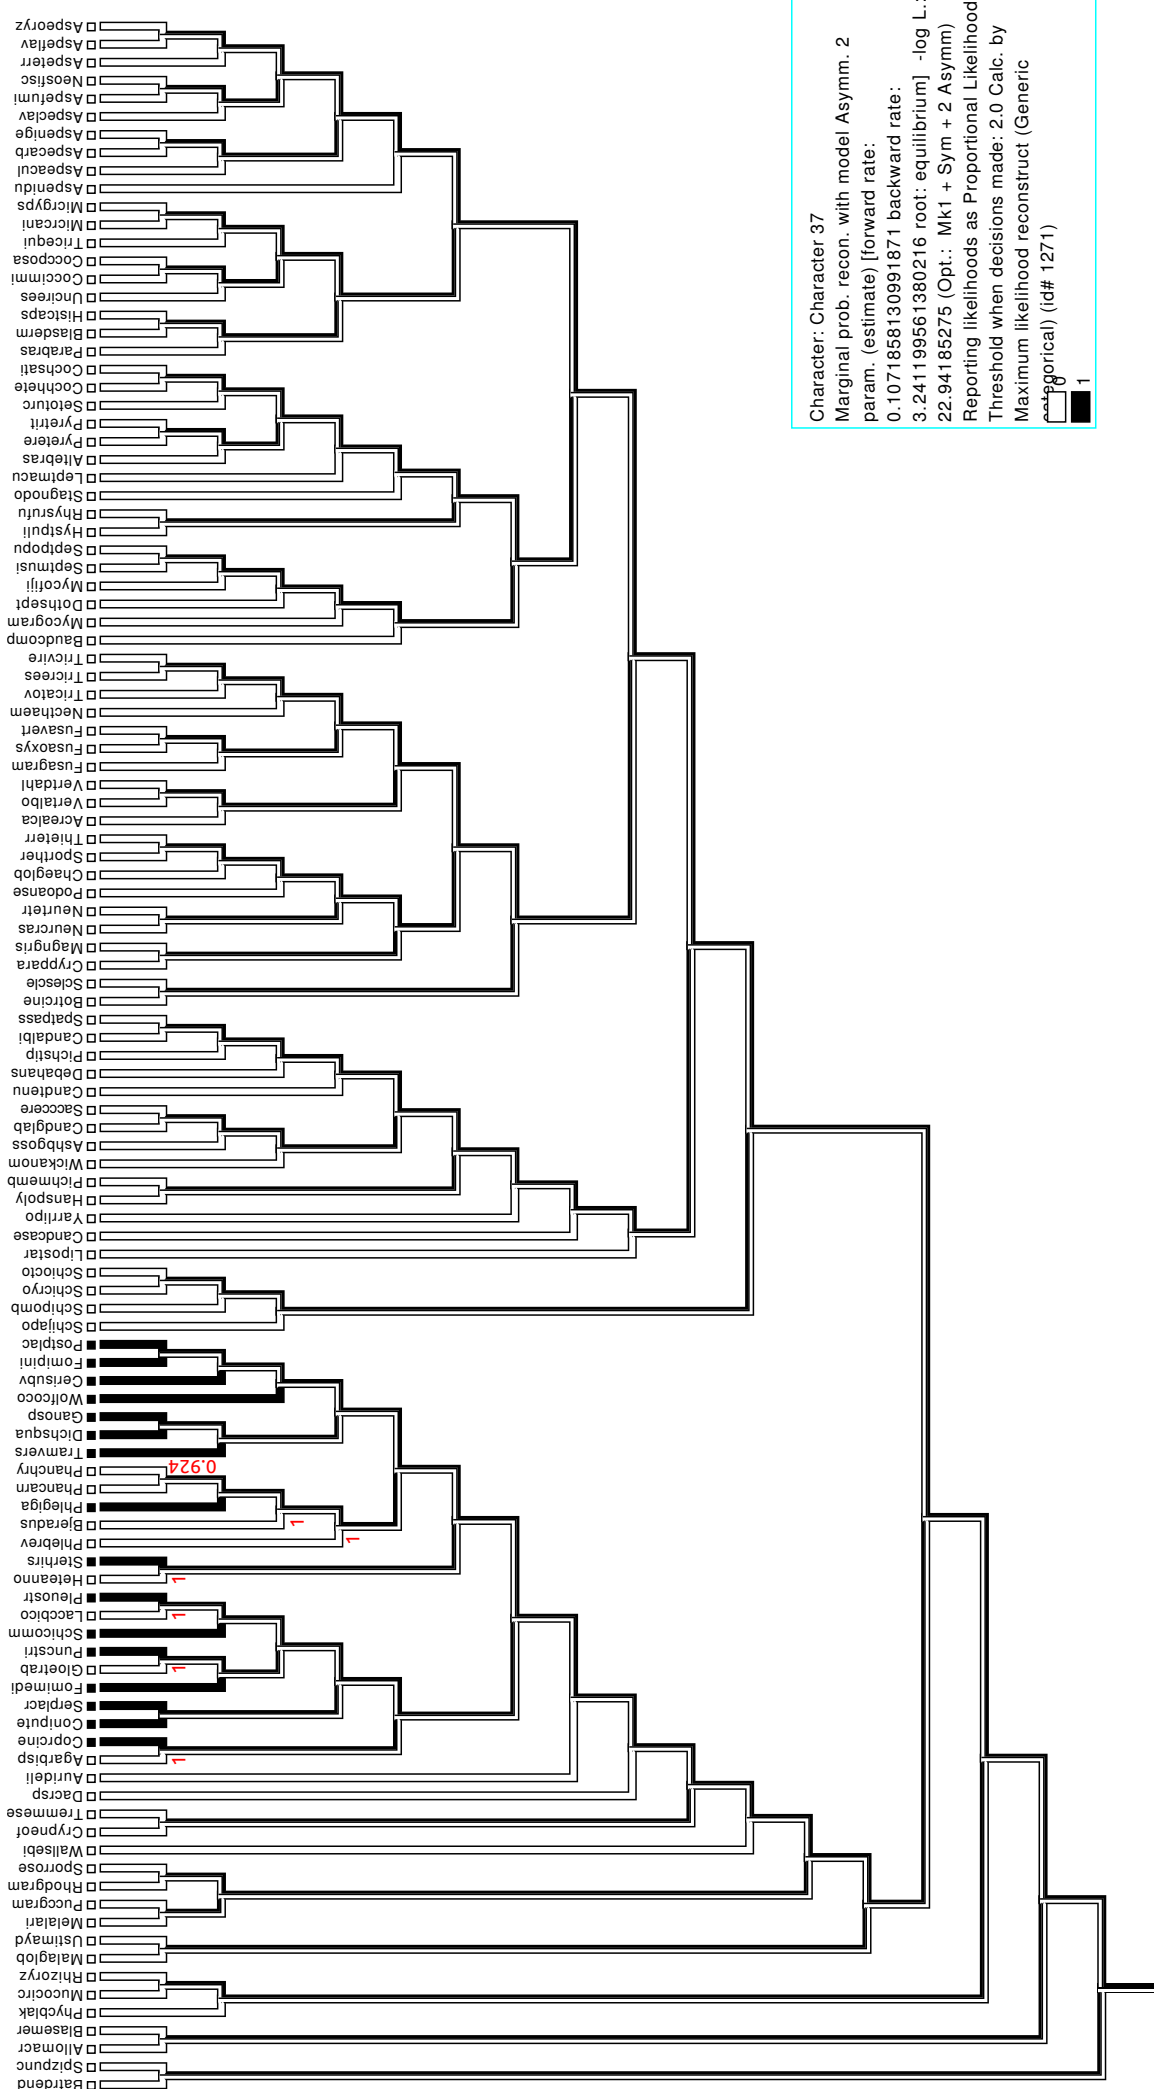

Character: Character 37  
 Marginal prob. recon. with model Asymm. 2  
 param. (estimate) [forward rate:  
 0.1071858130991871 backward rate:  
 3.241199561380216 root: equilibrium] -log L.:  
 22.94185275 (Opt.: Mk1 + Sym + 2 Asymm)  
 Reporting likelihoods as Proportional Likelihoods;  
 Threshold when decisions made: 2.0 Calc. by  
 Maximum likelihood reconstruct (Generic  
 categorical) (id# 1271)



# Putative Fusion 37

September 26, 2012

## 1 Fasta Sequences

These are the unfused sequences identified by fdfBLAST belonging to the putative gene fusion in FASTA format. Accessions may be shortened, but belong to either the taxons individual genome project or NCBI's accession numbering.

```
>gi|116208054|ref|XP_001229836.1| hypothetical protein CHGG_03320 [Chaetomium globosum]
MDILQRLGIPLPIATGALGLIVALIAGMGLFGRKNQMPVDGRTVLITGASEGMGRSAAIQLAAKGANIIL
VSRNVGRLEEALTDVKAASSPATQRFTYITADVSEPDYASAVIAEAIWNGGRSPDIVWCIAGMSTPLL
WTDDNAAAAARRNMDVNYFGSAEMSRAILREWLNPDNRDSTRPEPKHIVFTASVLALFAIVGYGPYTPSK
WALRGLADTLAMEVNLYPETPVKVHVVPATITSPGLERENKTKPAITTELEKDEPPETPDTVARRAIAG
LERGEYFVAVSFLGNLMRCGVMGGSPRNNWLFDTLLGWLVPVIYFFVLRIMNGQLLNHNPNYRHHQPSRTA
SGTILISRPGTSMKSSVIRSQRGRPSKVTKSVPTPRGRTPRQVA AHLATQEDHSQVHNLGNQNHVHSHTH
GHGHDLSEDKTDPASVFDDVRMGAEDYAAAAAAAAAVMDTDLTDAHGAEAEADMDDDEDGPGSLPHVD
LTAANILANGGAGPGNAMSQPVQEQLQEMQQLAHAQHAHQHAHQHHPHSHQHHQPPAQMGTPQQIQPG
HQGMDGSMVKTTEDLARDSGYGDLNVESALAKRLARDPGQRLAQRRPEQVLNLARRSNVEALFAHIAGE
PARIPCKNCHKHGPWTSCVVVDGQMCGSCANCWFNASGARCSFHETRNPQPVPQHPTILPAATTGMTND
PTYRFAAASHPLLQPHGPALGGVSHPGGLLINNPVLQEMVNRAMVEVRQANKATRQLIQIEITAKQLALQ
IVECEEMVNNQEQQSGSGQQAMGDDSGA
```

## 2 Annotated Phylograms

All trees were generated from an initial run of Darren's Orchard pipeline against 139 taxa (Table S1), using the above corresponding un-fused sequences as BLAST seeds. The alignments were then checked for any missing taxa, manually masked and then ProtTest3 was run, please see the Methods section for detail. The final trees were generated by the following command:

```
phyml -i alignment_file -d aa -b 100 -m model -c 8 -v invariant_sites -s BEST --quiet
-a gamma
```

Styling and annotation was made possible by Dendroscope and Inkscape.

## 3 Mesquite Cladogram

This tree is the 68-gene concatenated phylogeny (Fig. 1), with the presence of a fusion (black), presence of a fission (white), and absent/undetermined (grey) status of gene fusion characters plotted on to it using a "1/0/-" nexus-style data matrix. We used the program 'Mesquite' to calculate proportional likelihoods based on either an "Mk1" or "Assym. 2 param model." (see Table S4) of character change across the fungal phylogeny (Fig. 1). This allowed for a proportional likelihood of the position of the fusion/fission to be calculated.

Annotation

✓ Presence

✗ Absence

# Other Fusion

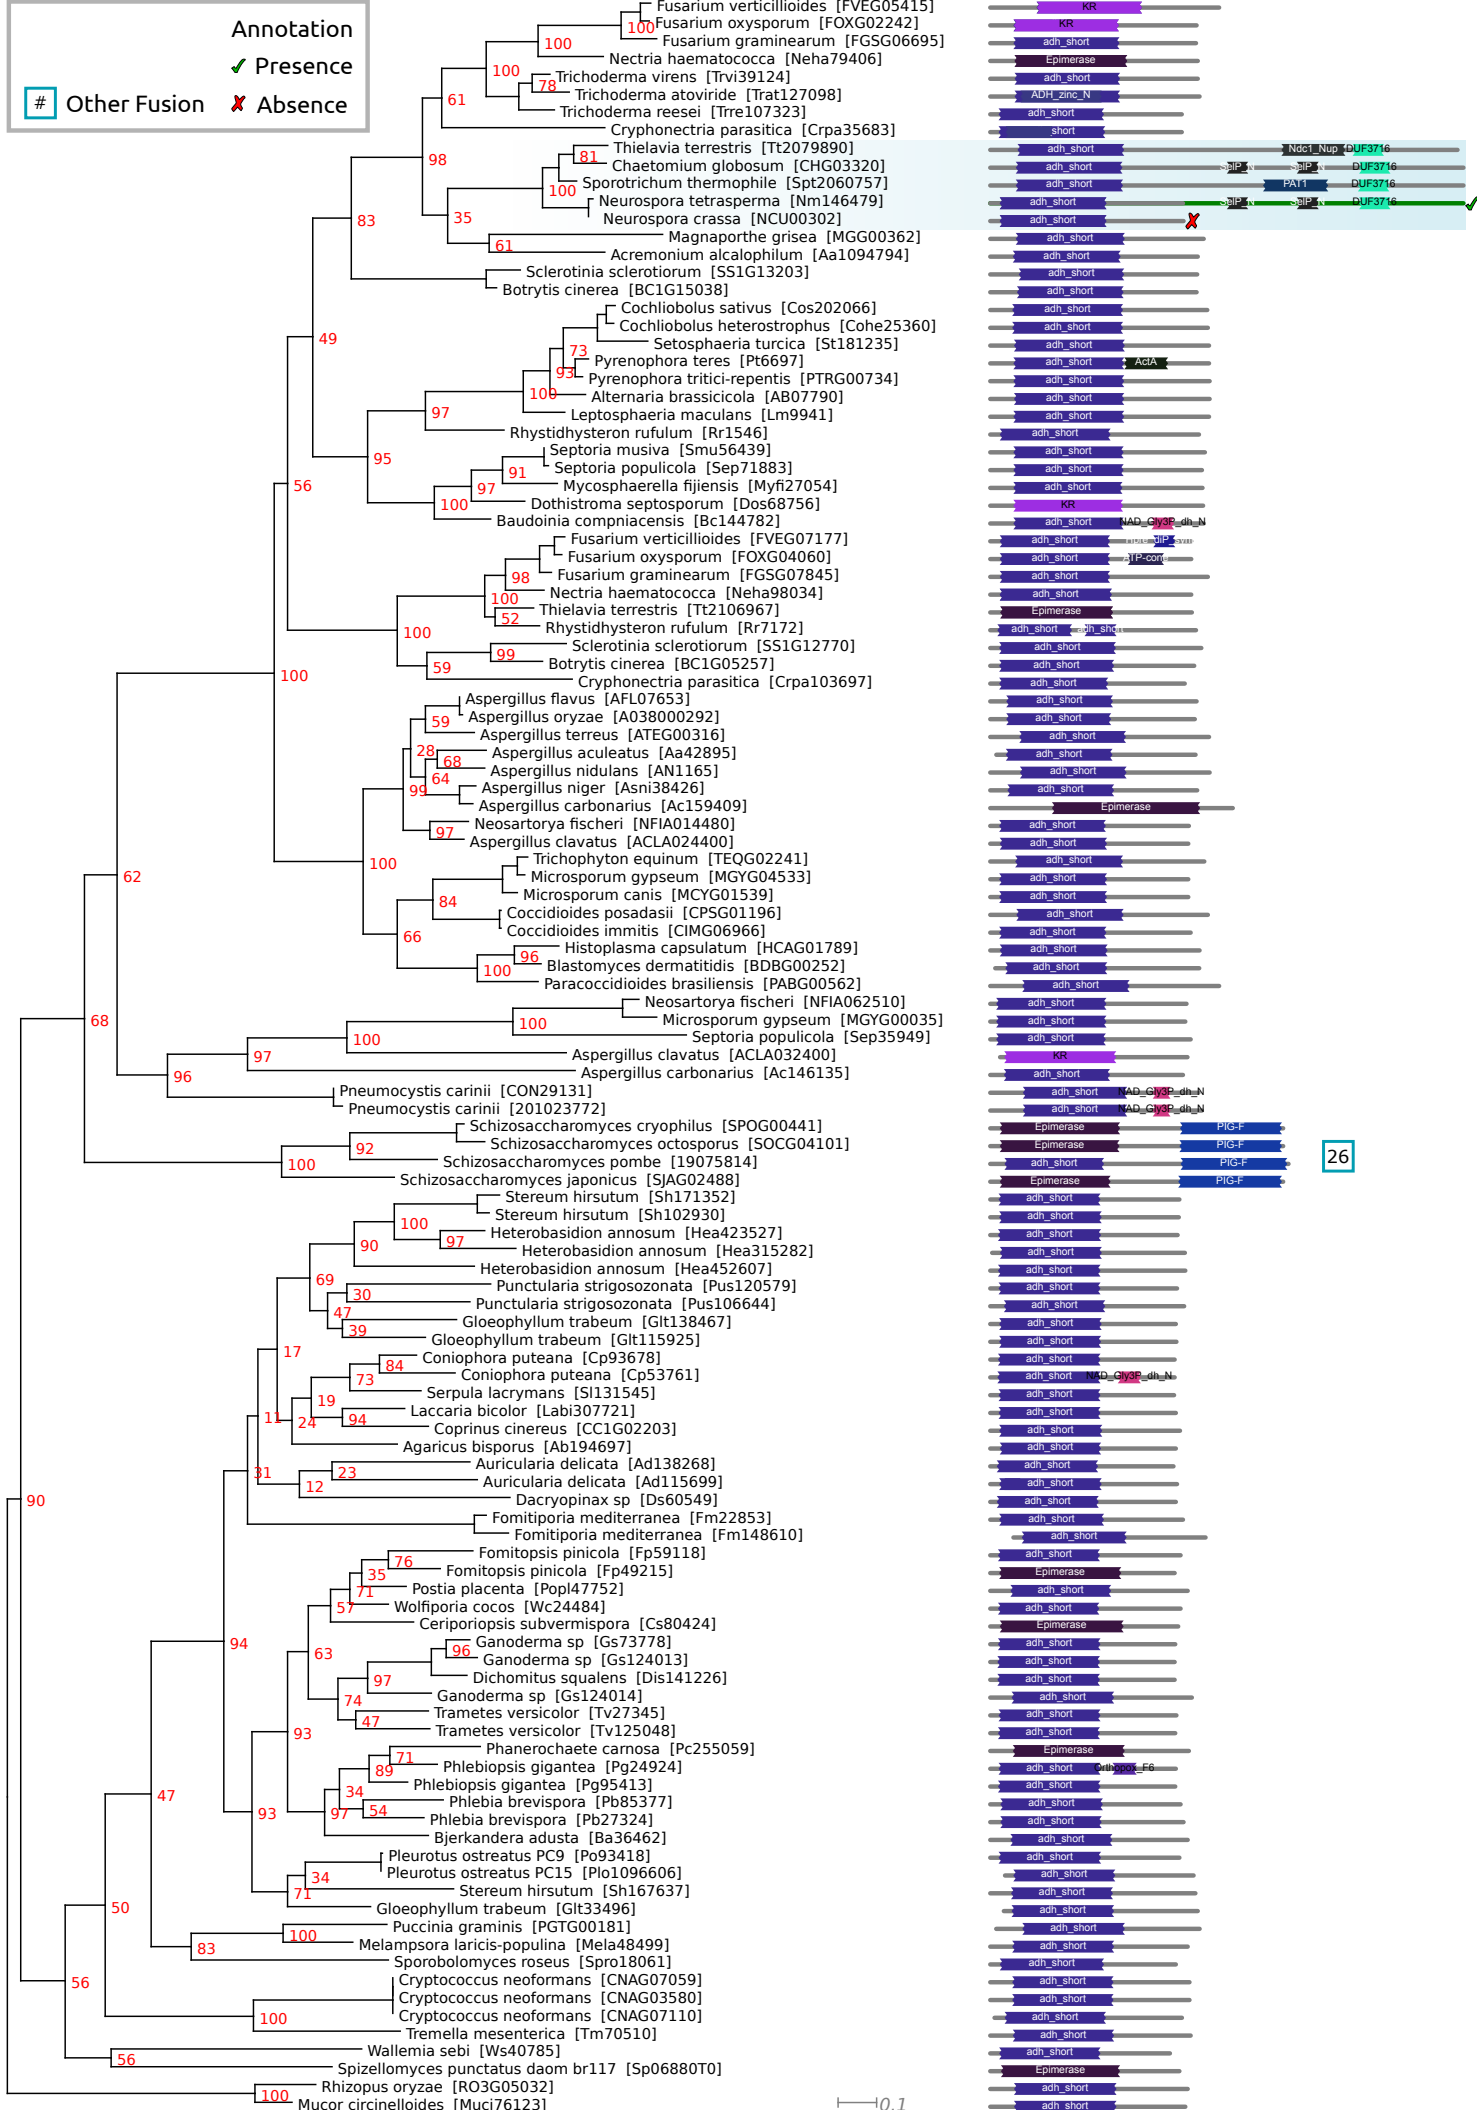

Annotation  
 ✓ Presence  
 ✗ Absence

# Other Fusion

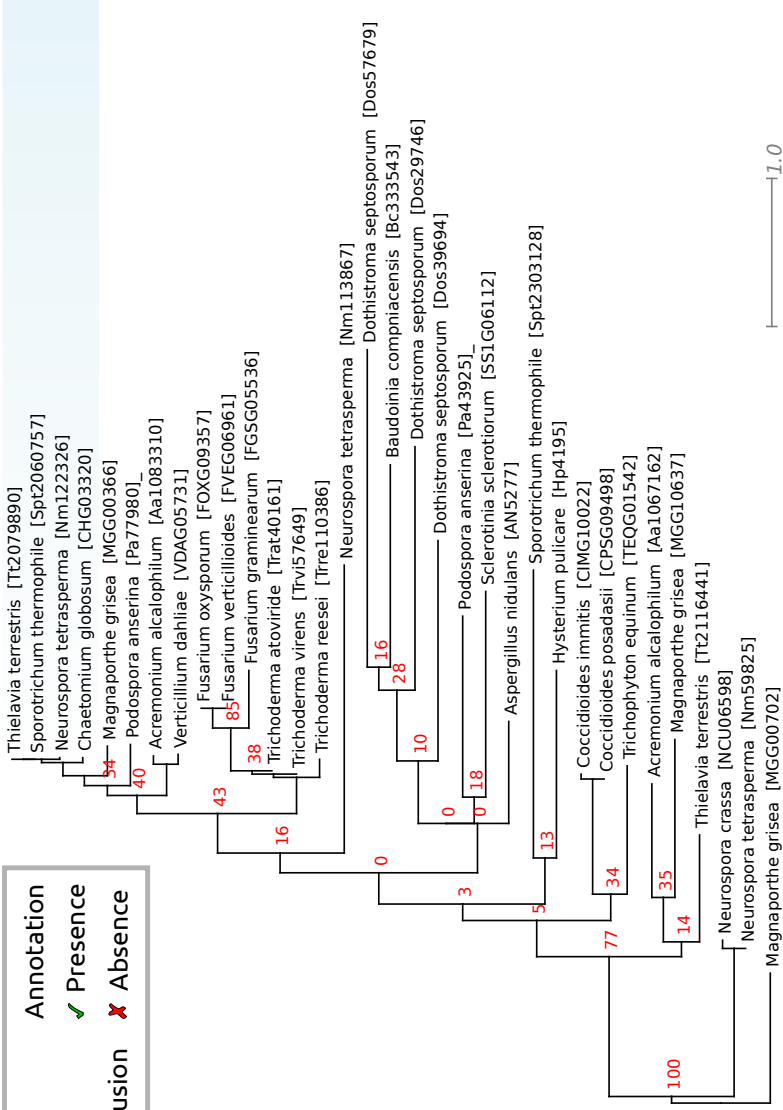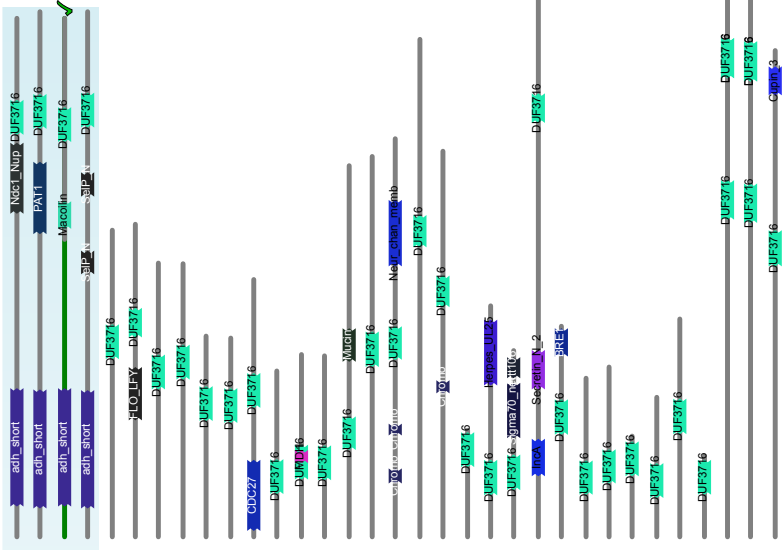

1.0

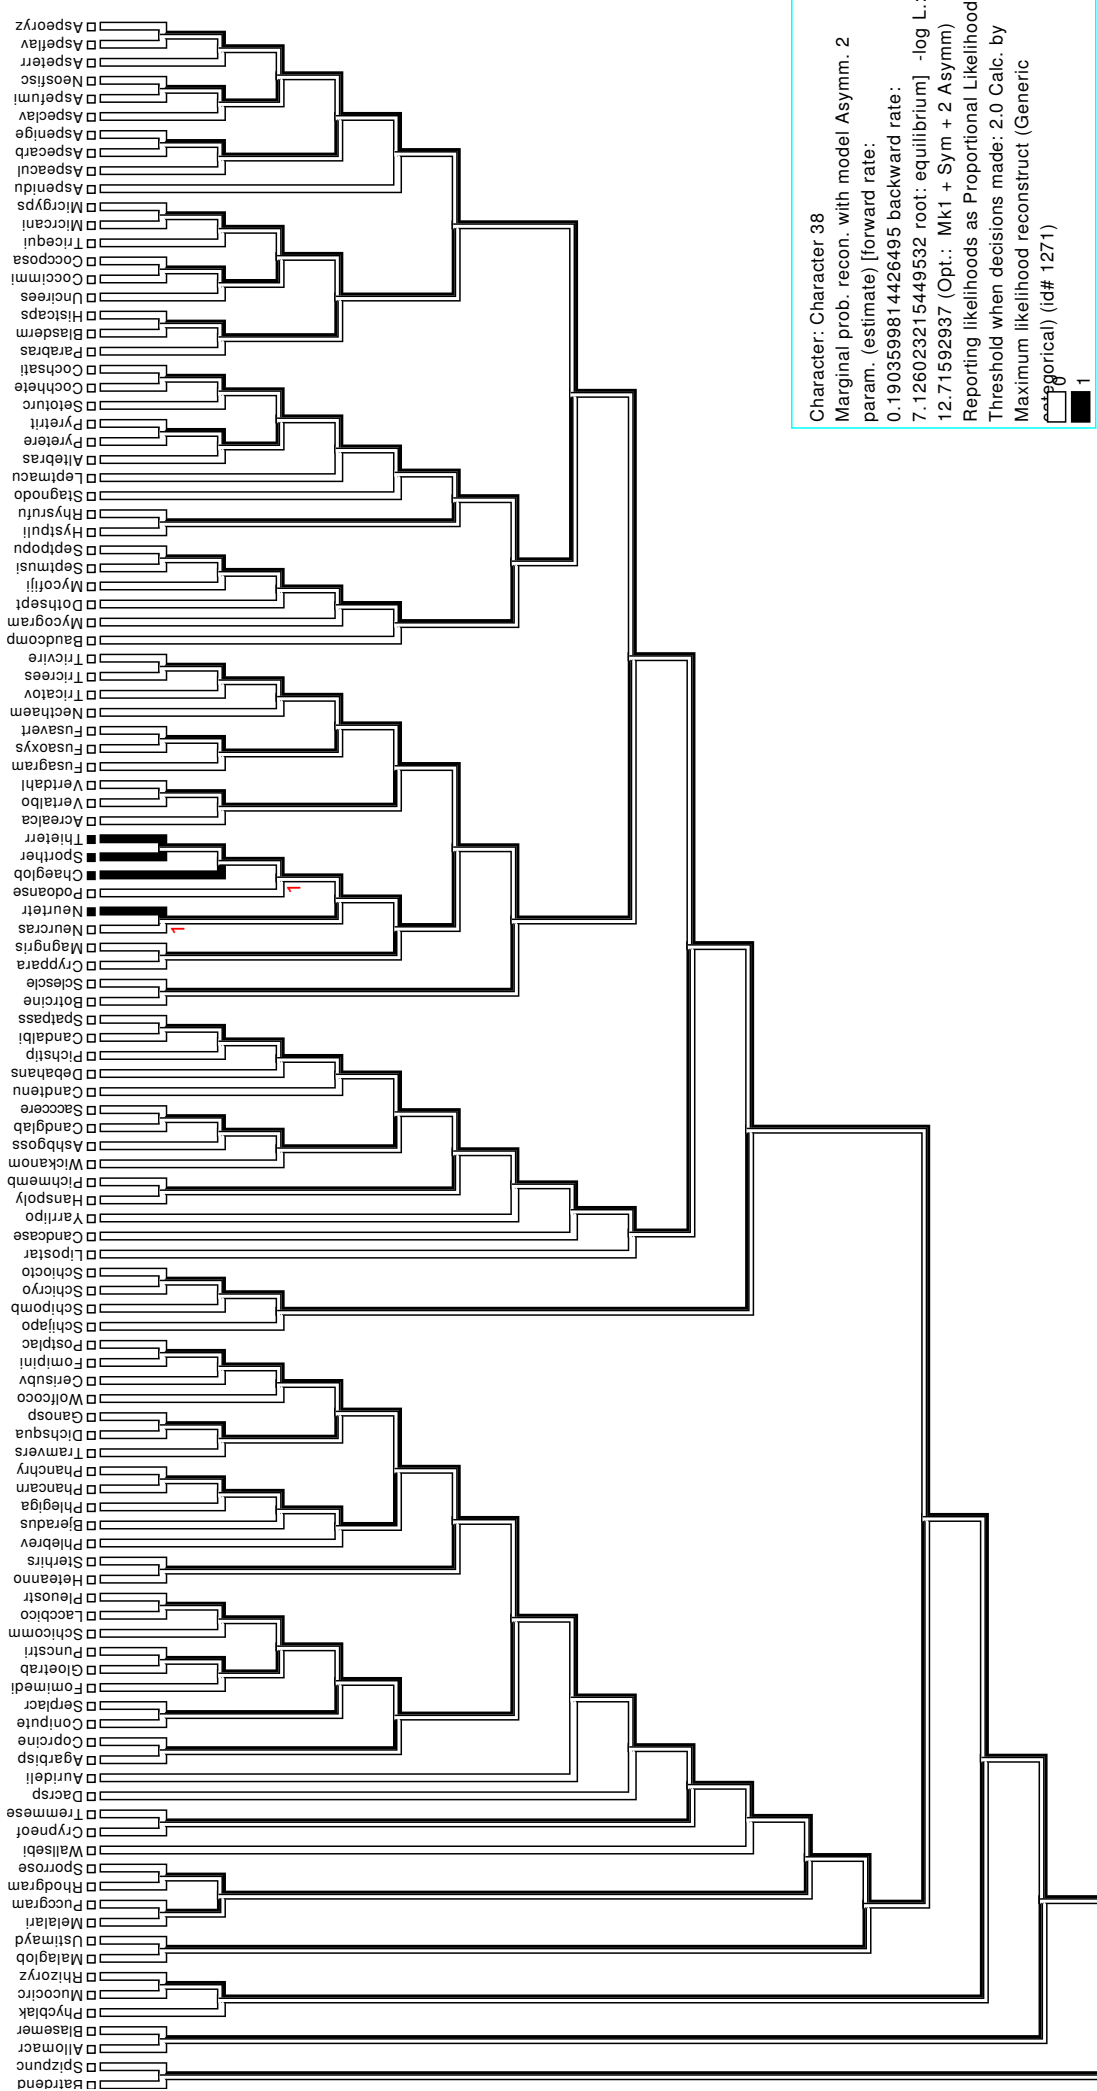

- Rattand
- Spizunc
- Allomacr
- Phycblak
- Mucocitc
- Rhizoyz
- Malaglob
- Ustimayd
- Melatari
- Puccgram
- Rhodgram
- Sporose
- Wallsebl
- Cypneot
- Tremmese
- Dacrsp
- Aurideli
- Agarhisp
- Coprine
- Conipute
- Serplacr
- Fomimedl
- Gloetrab
- Punctri
- Schicom
- Laccbico
- Pleuost
- Heteanno
- Sterhirs
- Phlebrev
- Bjeradus
- Phlegiga
- Phancarn
- Phanchry
- Tamvers
- Dichsqua
- Ganosp
- Wolfcoco
- Censubv
- Fompmi
- Postplac
- Schifapo
- Schipomb
- Schichyo
- Schiocto
- Lipostar
- Candcace
- Yarrilpo
- Hanspoly
- Pichmemb
- Wikanom
- Ashbgoss
- Candglab
- Saccere
- Candtenu
- Debahans
- Pichstip
- Candalbi
- Spatpass
- Botcine
- Sclescle
- Cyppara
- Magngfris
- Neuroras
- Neuritr
- Podanse
- Chaetlob
- Sporther
- Thieterr
- Acrealca
- Vertalbo
- Verdahl
- Fusagram
- Fusoxys
- Fusavert
- Nechaem
- Tricatov
- Tricrees
- Tricvire
- Baudcomp
- Mycoqram
- Dothsept
- Mycotiji
- Sepimusl
- Sepipou
- Hyspuli
- Rhystrfu
- Stagnodo
- Lepimacu
- Aliebras
- Pyeter
- Pyetrit
- Setiure
- Coohete
- Cochsati
- Parabras
- Blasderm
- Histcaps
- Unctrees
- Cocclm
- Cocoposa
- Tricequi
- Micrcani
- Micrgyps
- Aspenu
- Aspacul
- Aspacarb
- Aspacige
- Aspaclav
- Aspacum
- Neostisc
- Aspeterr
- Aspetlav
- Aspetoyz

# Putative Fusion 38

September 27, 2012

## 1 Fasta Sequences

These are the unfused sequences identified by fdfBLAST belonging to the putative gene fusion in FASTA format. Accessions may be shortened, but belong to either the taxons individual genome project or NCBI's accession numbering.

```
>P1o1073489_dom1
MISHFLRHPFQALCELLTNPYFGAVAALVVVGDAVLTQLIVRFIPYTEIDWETYMAQIA
VIMKGETDYSRISGPTGPLVYPAGHVYIHQLLYKITDAGRNMALSQQIYAGLYVSSLILT
CCIYRKAGAPNWLLLALPLSKRLHSIYVLRFLFNDWCWSVTAALAAVLAYQFEMDDLAVLLY
STALSIKMSILLYLPGLLVLLYKRRGLLTFRQMITILSFQAVIARTFIKADLSAYLNGA
FDLSRVFLFKWTVNWRILGEGFLDRRWAVGLLVGHVSVLVAFGYRWCPRPDGGPLPTILR
GISRPSTPAGLVPVSPDYVATVLFSTNLIGIFFARSLHYQFYSWYAQQLPFLVFKTRYAM
PVKLTILVAVEFAWNVYPSTNVSSSILLLAHSLLAGIWRHNYTFPAIAPKDYLECRTLL
>P1o1073489_dom2
DDQILLIDNFLTAAECKQYIQFIDNLPLELTPPKKRGEAERVNYRFSIPSVDFAERLHSL
FQPYVLSLPTSTWRTSESRHSPVGCNSNIRLYKYNPGQHFGAHYDSDVRDPATGLKSEW
TILMYLSGIEDGVEGETIFYLEQK GKAREPIAAPLTRGTALLHRHGSECLLHEGSPVRK
GTKYILRSDLMFKY
```

## 2 Annotated Phylograms

All trees were generated from an initial run of Darren's Orchard pipeline against 139 taxa (Table S1), using the above corresponding un-fused sequences as BLAST seeds. The alignments were then checked for any missing taxa, manually masked and then ProtTest3 was run, please see the Methods section for detail. The final trees were generated by the following command:

```
phym1 -i alignment_file -d aa -b 100 -m model -c 8 -v invariant_sites -s BEST --quiet -a gamma
```

Styling and annotation was made possible by Dendroscope and Inkscape.

## 3 Mesquite Cladogram

This tree is the 68-gene concatenated phylogeny (Fig. 1), with the presence of a fusion (black), presence of a fission (white), and absent/undetermined (grey) status of gene fusion characters plotted on to it using a "1/0/-" nexus-style data matrix. We used the program 'Mesquite' to calculate proportional likelihoods based on either an "Mk1" or "Assym. 2 param model." (see Table S4) of character change across the fungal phylogeny (Fig. 1). This allowed for a proportional likelihood of the position of the fusion/fission to be calculated.

Annotation

✓ Presence

✗ Absence

# Other Fusion

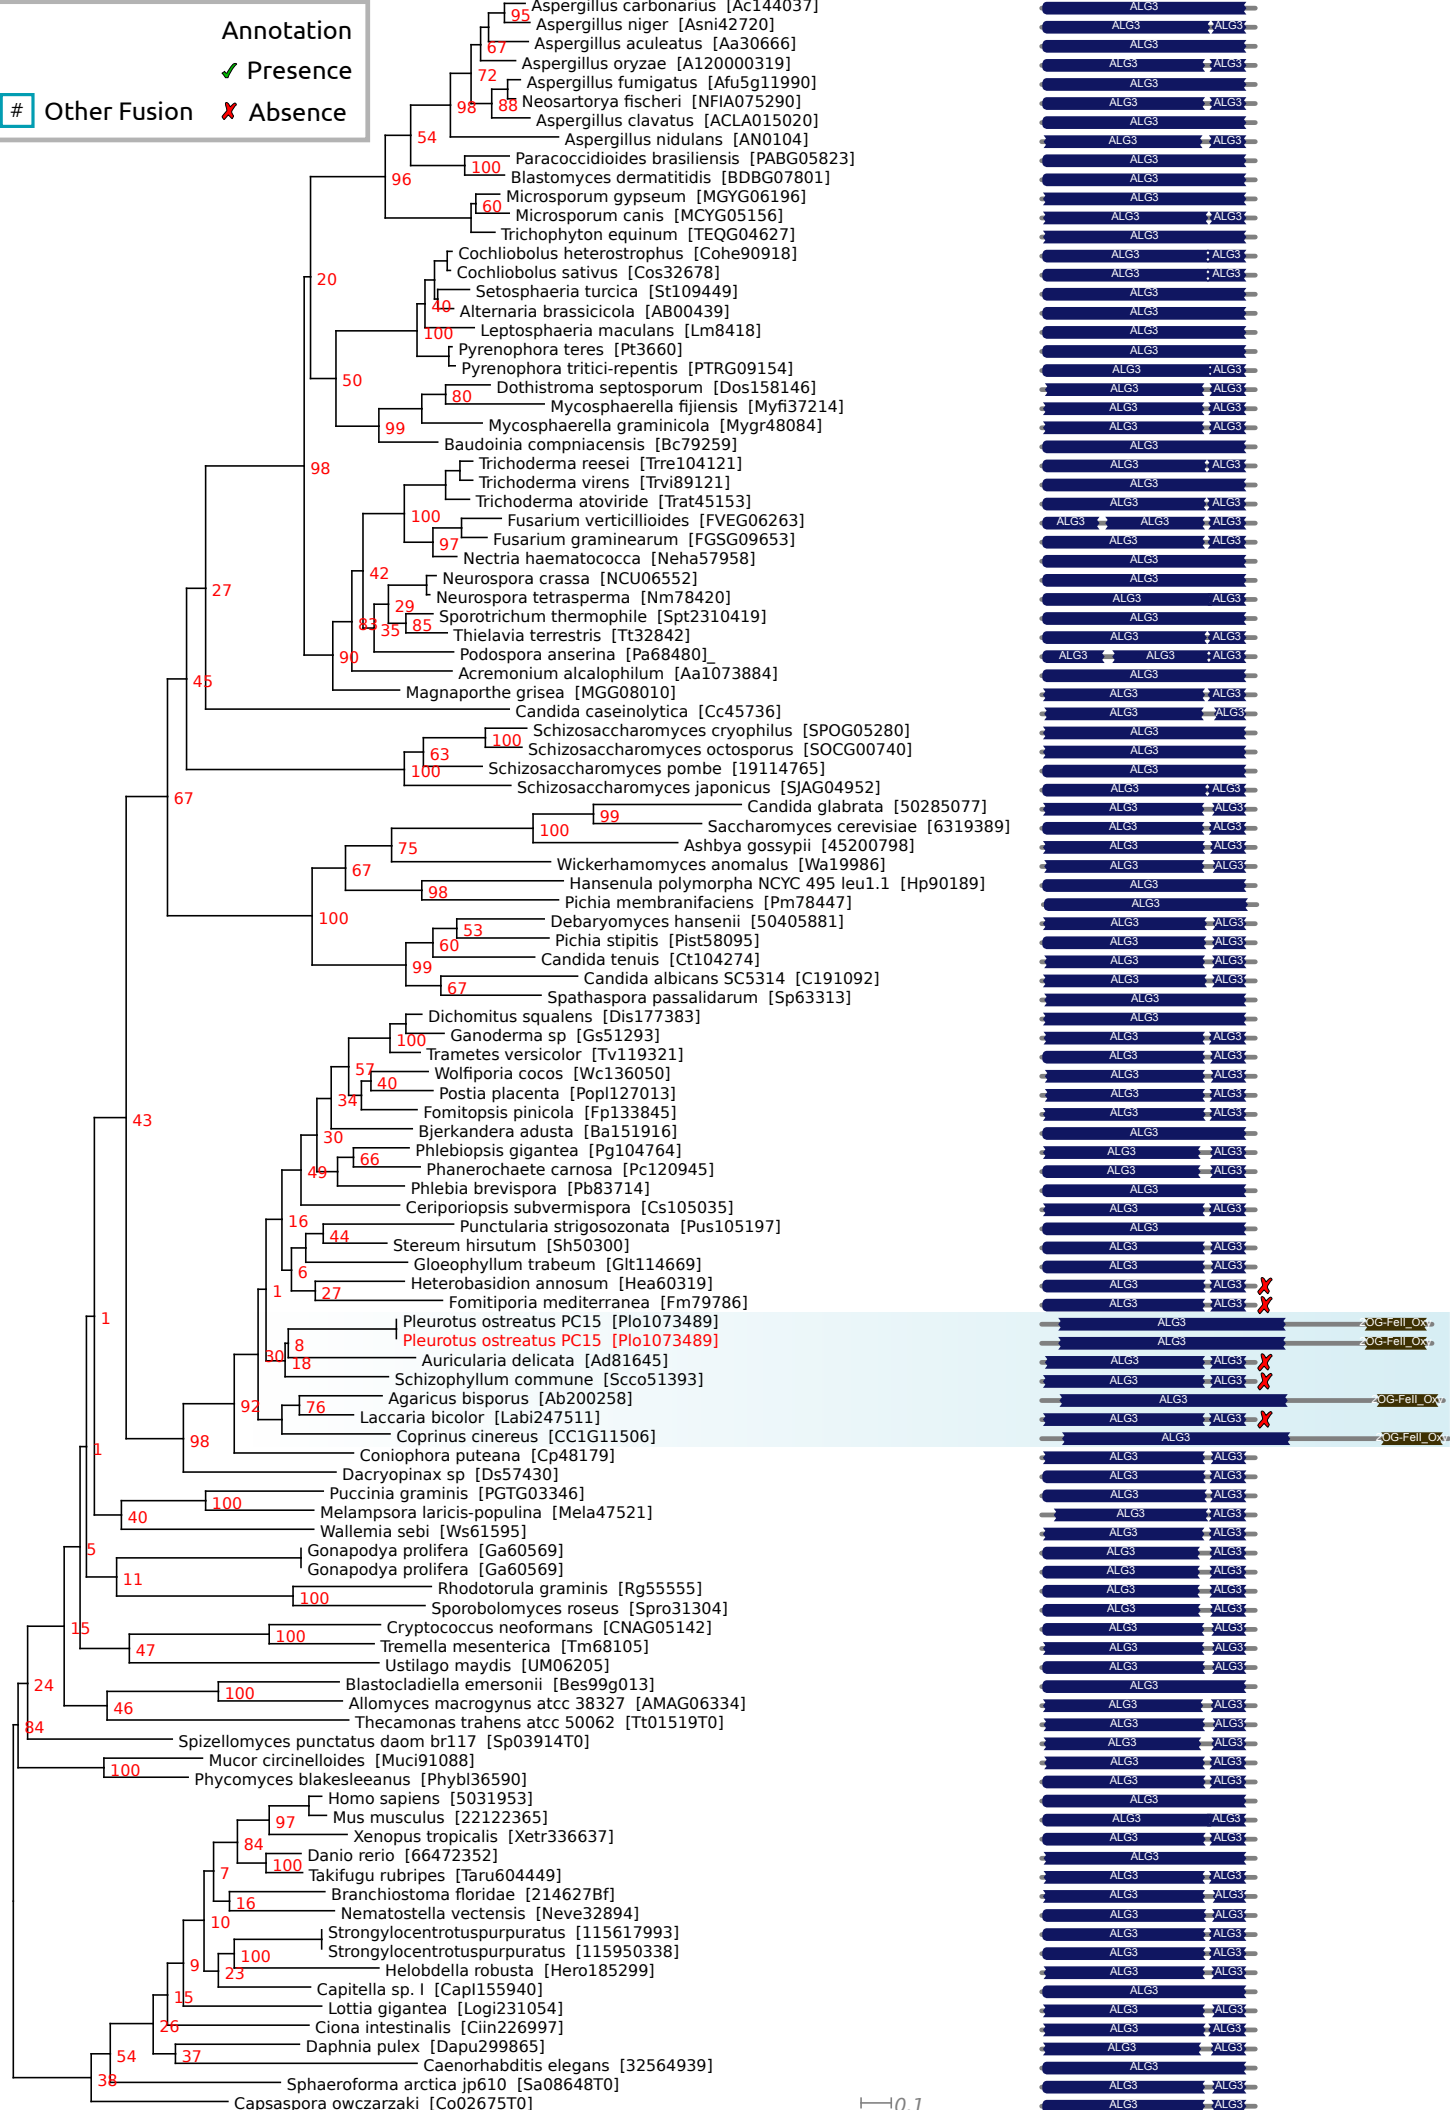

Annotation

✓ Presence

✗ Absence

Other Fusion

#

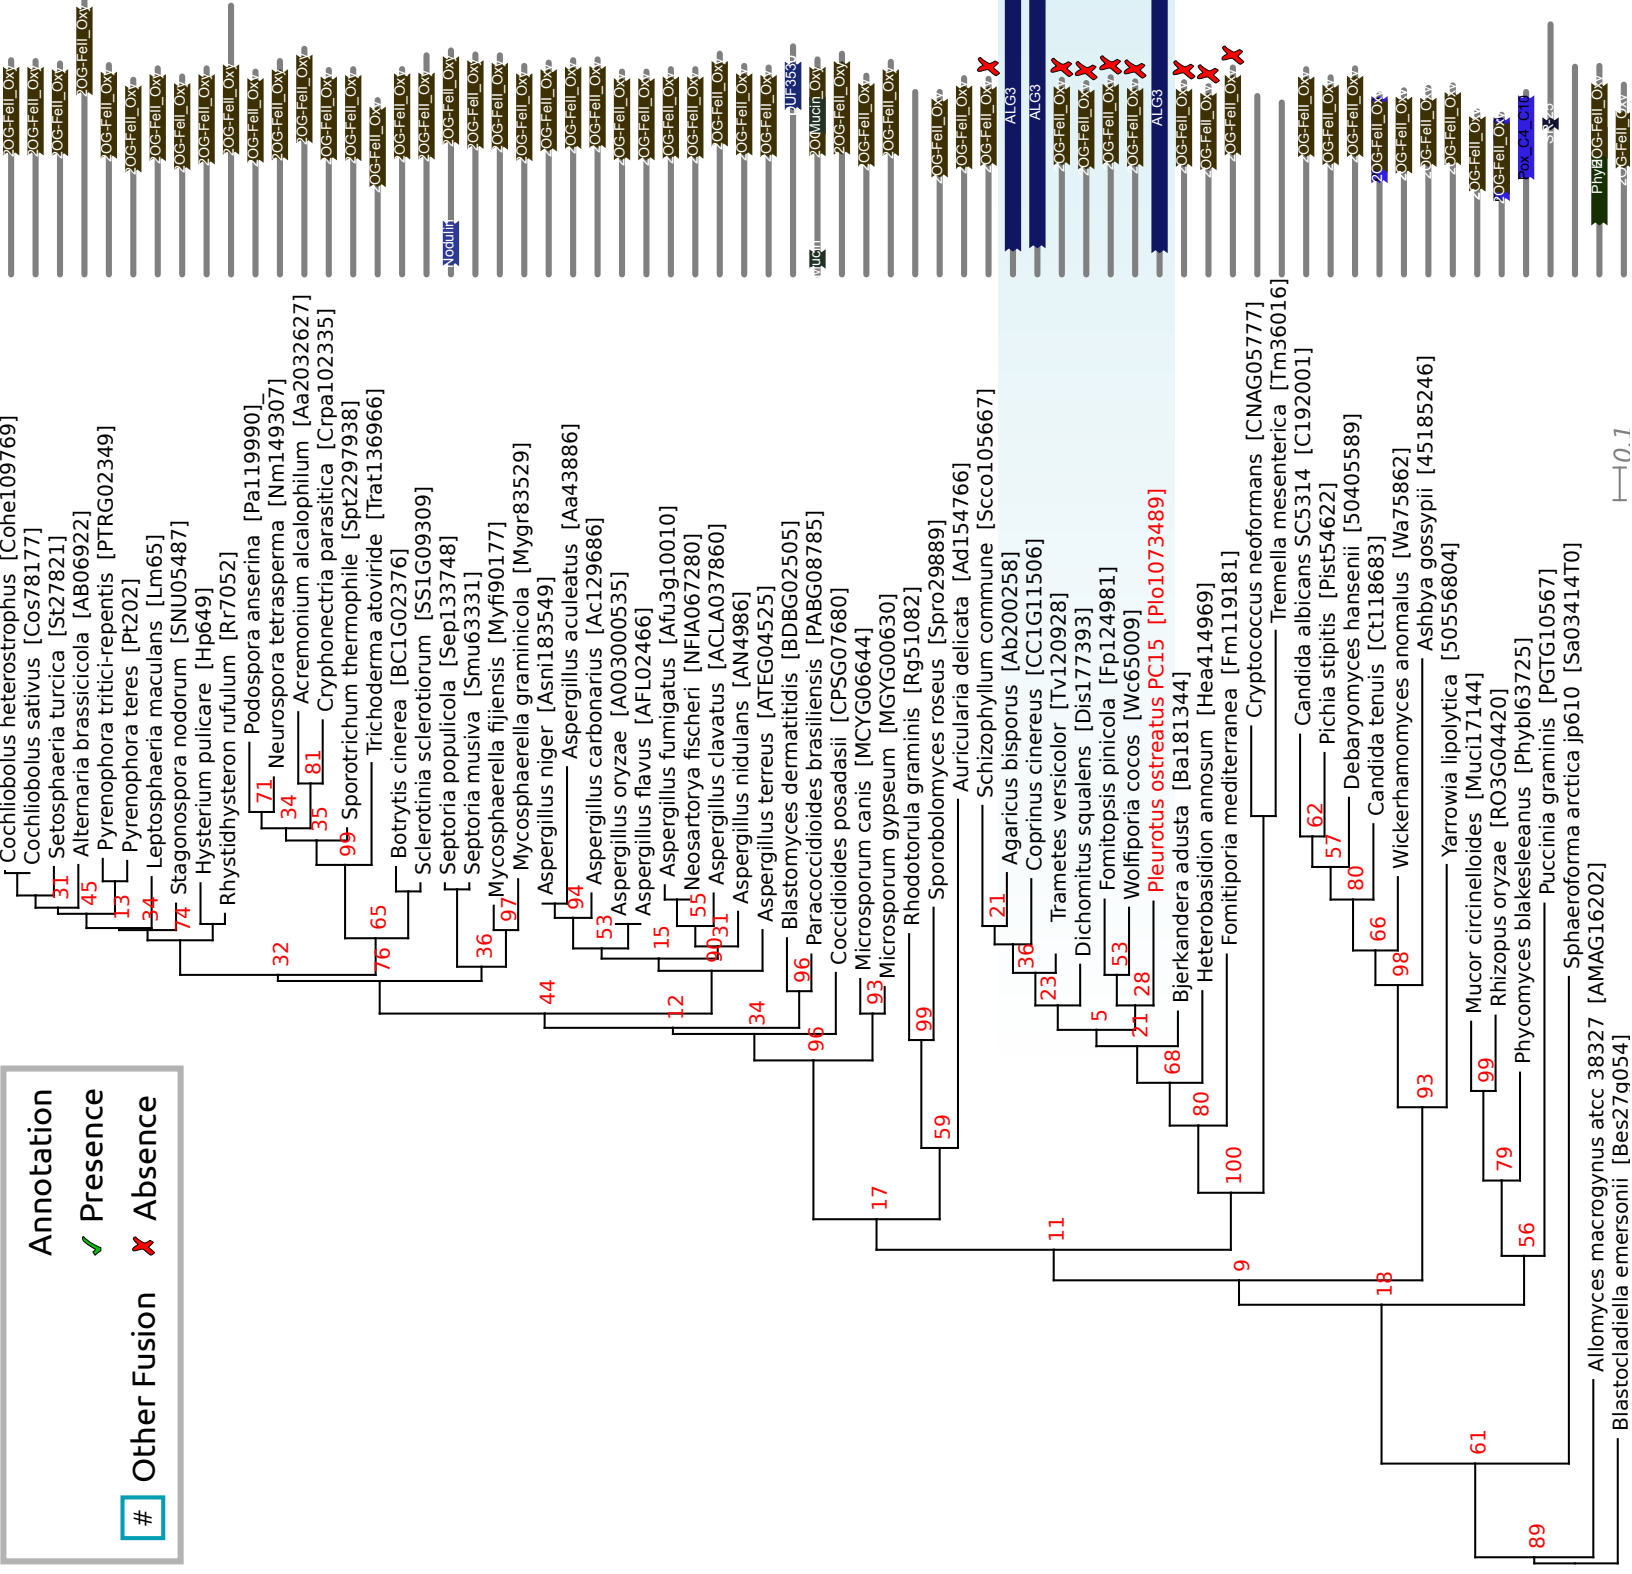



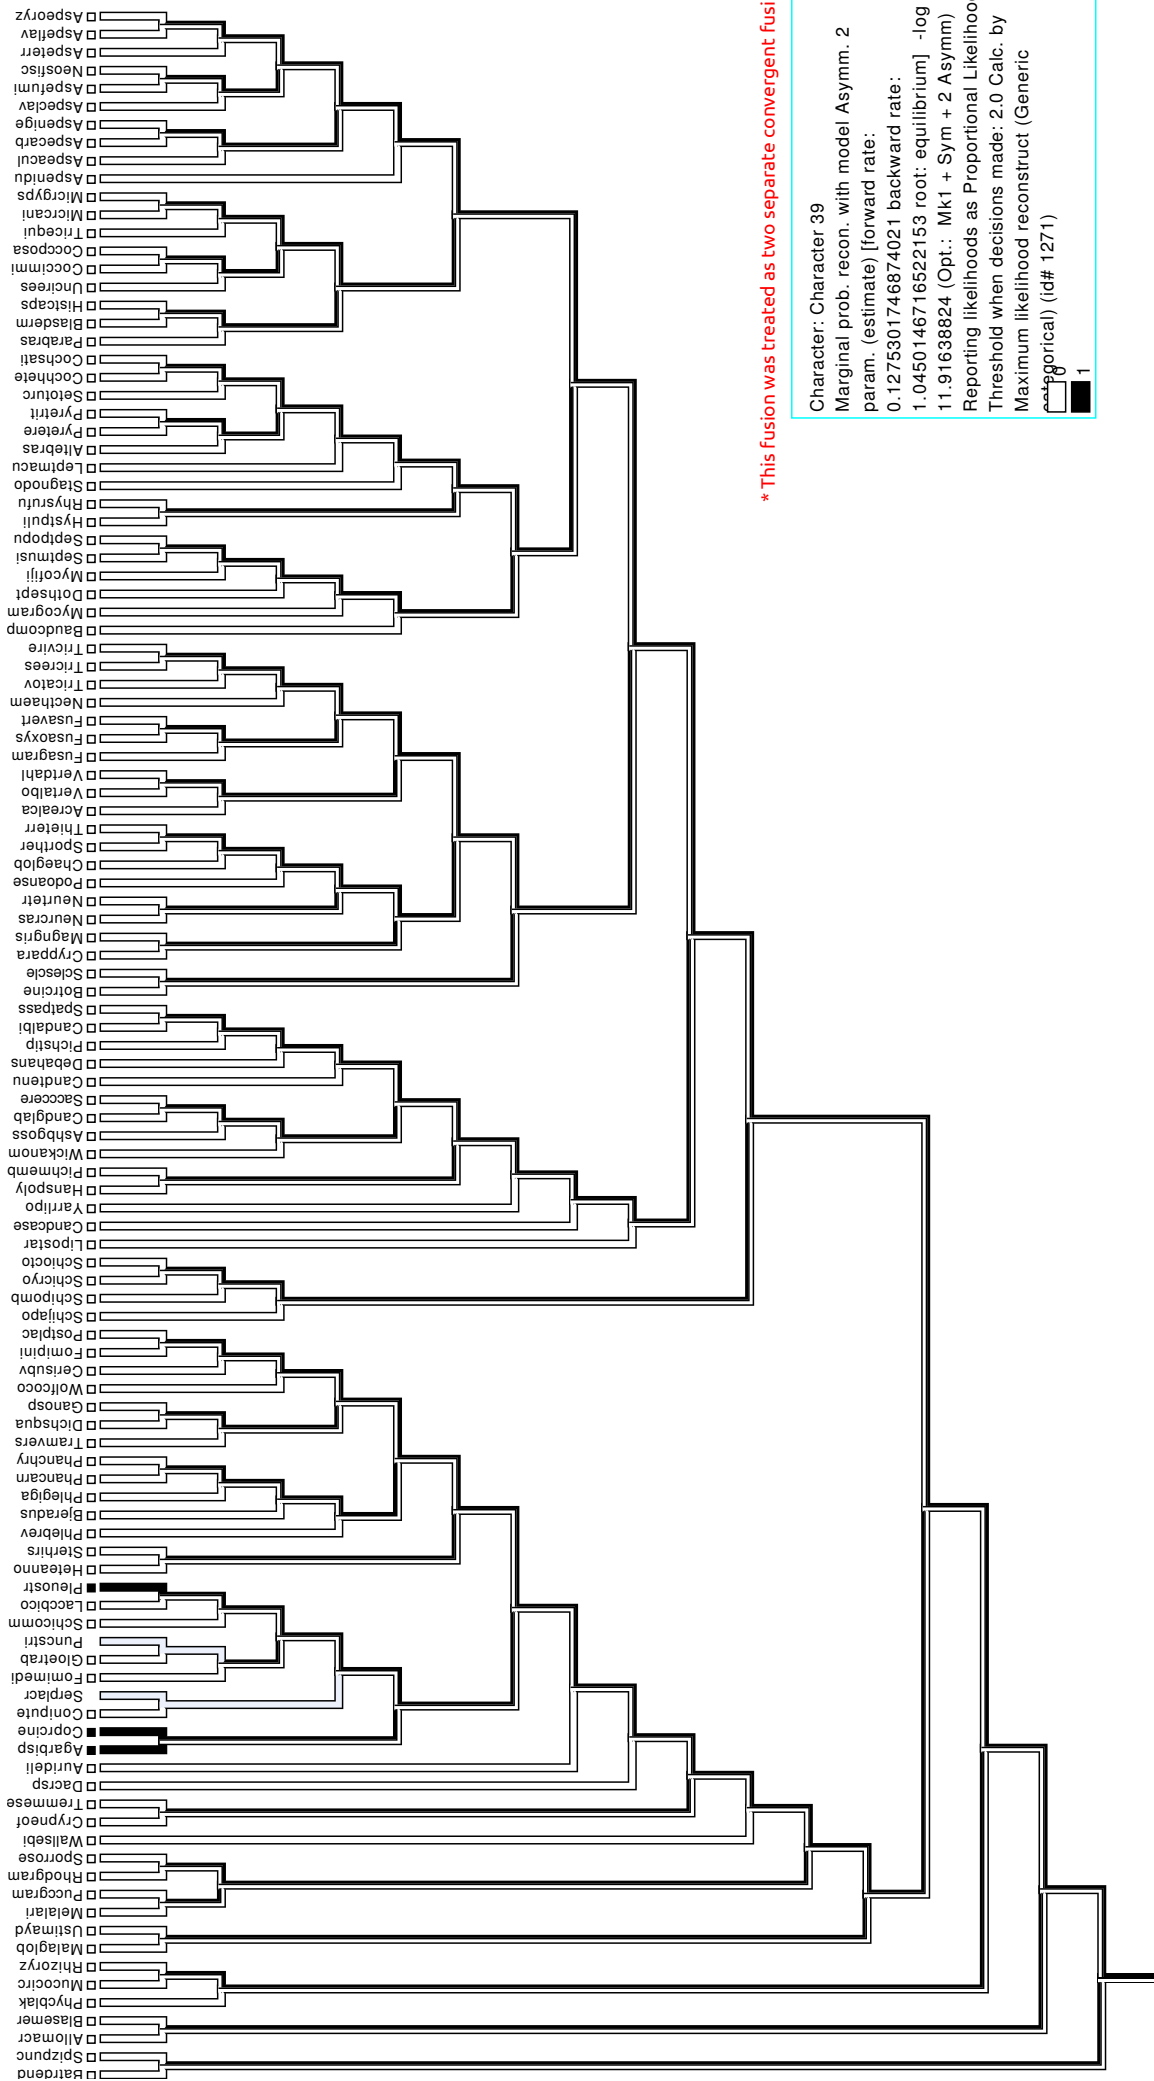

\* This fusion was treated as two separate convergent fusions

Character: Character 39  
 Marginal prob. recon. with model Asymm. 2  
 param. (estimate) [forward rate:  
 0.1275301746874021 backward rate:  
 1.0450146716522153 root: equilibrium] -log L.:  
 11.91638824 (Opt.: Mk1 + Sym + 2 Asymm)  
 Reporting likelihoods as Proportional Likelihoods;  
 Threshold when decisions made: 2.0 Calc. by  
 Maximum likelihood reconstruct (Generic  
 categorical) (id# 1271)

# Putative Fusion 39

September 27, 2012

## 1 Fasta Sequences

These are the unfused sequences identified by fdFBLAST belonging to the putative gene fusion in FASTA format. Accessions may be shortened, but belong to either the taxons individual genome project or NCBI's accession numbering.

```
>XP_0030516041Neha_dom1
MTSIADIEIEYKLDTVETQSVAAANDIDKTRFTTCIDLIISSALGGKVLGFSDQWFCEATNLL
NPKAPIRQQGKMVFTGAWYDGWETRRHNSEPFDYVVIRLGVASGTIEGIEVDTAFFNGNH
APAISVEGCFSQDDEEVASWKGGRGKWTILGVQECGPSEFCWKLKTPQKQYTHVRLN
MYPDGGIARFRLFGHAVPVFPDDKDVIFDLAAAQNGGLAVSCSDQHFGNKDNLPLPGRGK
DMGDGWETARSRAKGHTDFAI IKLGAPGYIERFGCEWTGHGDPVADAVAWREFVPPSKTG
PDQEHEFKSADGEKDRLVTHVKLIMIPDGGVKKLRAFGRAGQVGRLPSTTPRTISTQPQ
GISSQRPTTSPRPTVATRFKHAQAQTYSHTVCEIYPPKRLPPNSHEPSAASGSAPPSAMD
L
>XP_0030516041Neha_dom2
GDSLGPDGLPDNKPRALPSDLPRSLDDRRHVPNEHLVTETEMYDQWQQSQFLTTPALAK
PLNFGNLSLNDPDDYDDNVTGPKDSTRLMEMLAAQAAHQSGSFEDEDEIVNDEKLPDS
EKKVKLQKALNMAASNGDVERIGKLLNGKAKEYIDINAEDDGTPLIYASCFGHEPVPVQ
ALIGAGADV NQDRNQWTALMWAMTNRHKGIAKLLLDNASSDQKTSSGRTAFDFVPPDS
EMSYLHDNGYNIQSAGVTDDFYSPGFTQDRFEEEMAENEMRRRLMMESARDLEVDLGNV
GMDDQPEPVDEFEEEQEFDWNRCCLHDQMFVVFQEHLDRIIDIIITKMTQQRSPSQKVPV
ANMIFLSARYAHYHSSRELLERLLVSAMDYINDVVERCQWDMTILAFWISNATLLLLHYLK
KDAGLFHATAEFQAQLAELINEIFILIVRDAERRLDKVLVDVAMLDHETIPGFEDITFQNE
WKIFKRKAQVKEEPIEKFRFRPPSPKQRAKPAPRNVTSLLSSTLFVLDLYDIHVSISAQII
SQLLYWIGAELFNIRMSNRKYLARTKAMQIRMNISILEDWARTNRRQADHYEGSDMRSSG
ETTIDAARRHLAPVIQLLQWLQCFSSLDADDLEALVGTLLQLKRLSPQQLIHAANHYRPE
VGEKGLPKSAMKYLIAIQKEAALKRERRRSGMASPQRSGQDSSPVPVKNRNSGNHLETP
GSPPEDEWSDDDDDAPEHLLLDPALMLPFTLPSVTDMLVTYGAGFGGVNRERERKYIPTV
PPEFLEKLEVSGGTRKGPMPGEADWENEEV
```

## 2 Annotated Phylograms

All trees were generated from an initial run of Darren's Orchard pipeline against 139 taxa (Table S1), using the above corresponding un-fused sequences as BLAST seeds. The alignments were then checked for any missing taxa, manually masked and then ProtTest3 was run, please see the Methods section for detail. The final trees were generated by the following command:

```
phym1 -i alignment_file -d aa -b 100 -m model -c 8 -v invariant_sites -s BEST --quiet -a gamma
```

Styling and annotation was made possible by Dendroscope and Inkscape.

### 2.1 Important Notes

The original prediction made by fdFBLAST, on closer inspection (from the first round of phylogenies), indicated that there was not a gene fusion present between the above two domains but there was potentially a gene fusion with a third other domain. There is only one phylogeny here as the third domain consists of a series of repeats and so an alignment would not be possible as the resulting phylogeny would then be unresolved.

## 3 Mesquite Cladogram

This tree is the 68-gene concatenated phylogeny (Fig. 1), with the presence of a fusion (black), presence of a fission (white), and absent/undetermined (grey) status of gene fusion characters plotted on to it using a "1/0/-" nexus-style data matrix. We used the program 'Mesquite' to calculate proportional likelihoods based on either an "Mk1" or "Assym. 2 param model." (see Table S4) of character change across the fungal phylogeny (Fig. 1). This allowed for a proportional likelihood of the position of the fusion/fission to be calculated.

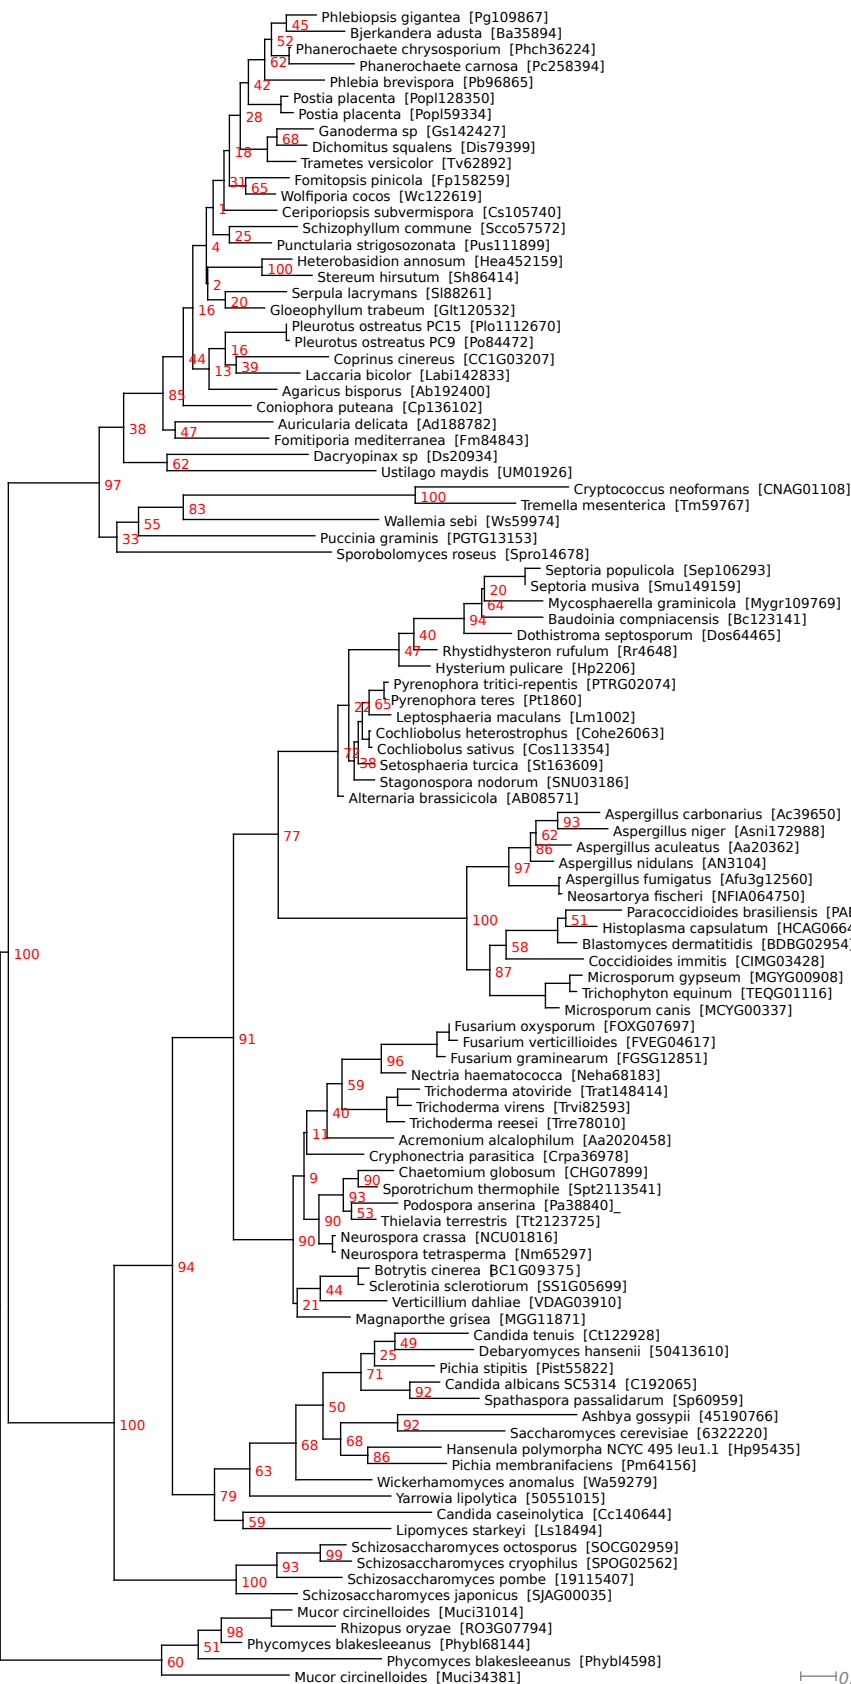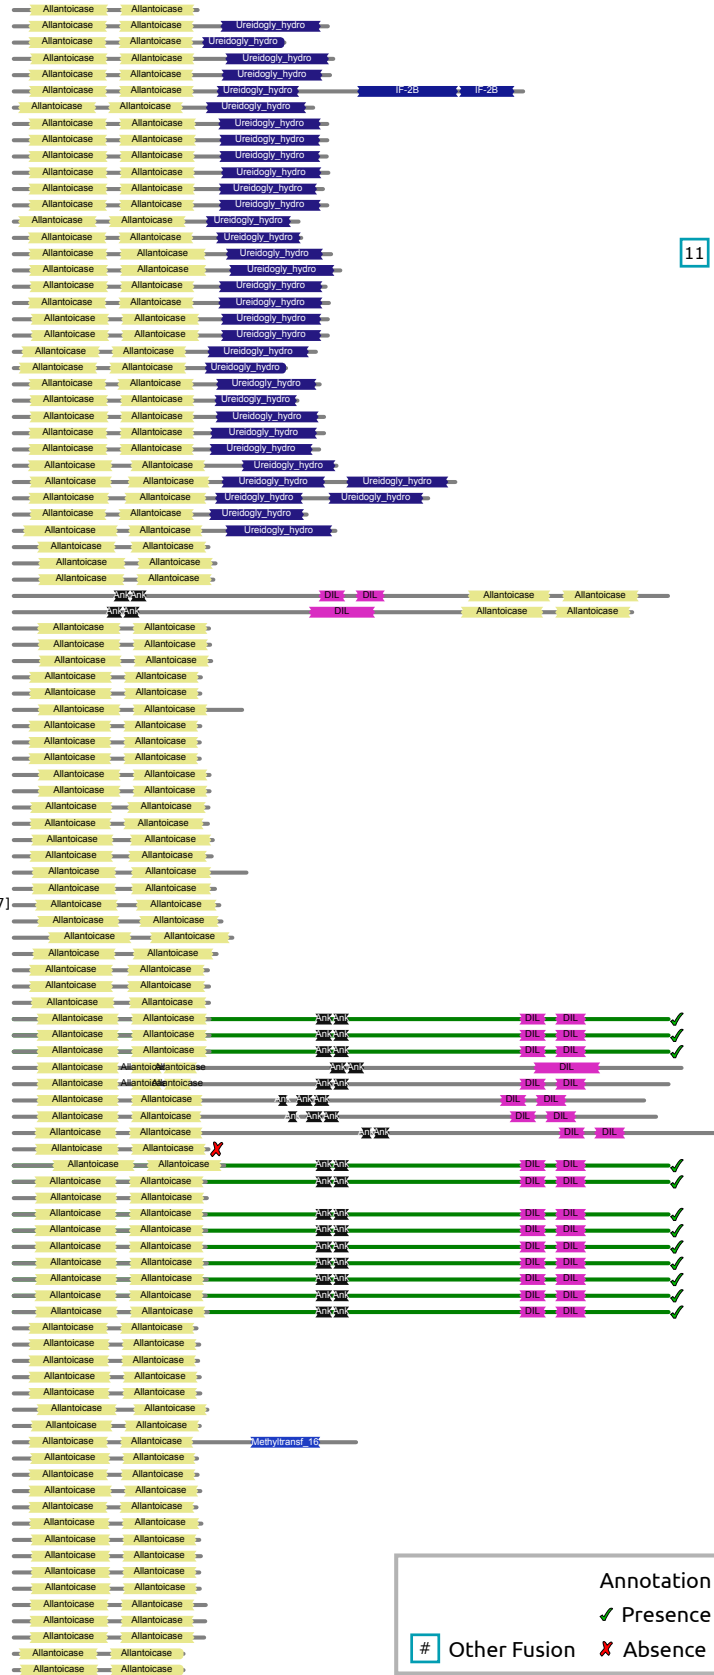

11

Annotation

✓ Presence

# Other Fusion ✗ Absence

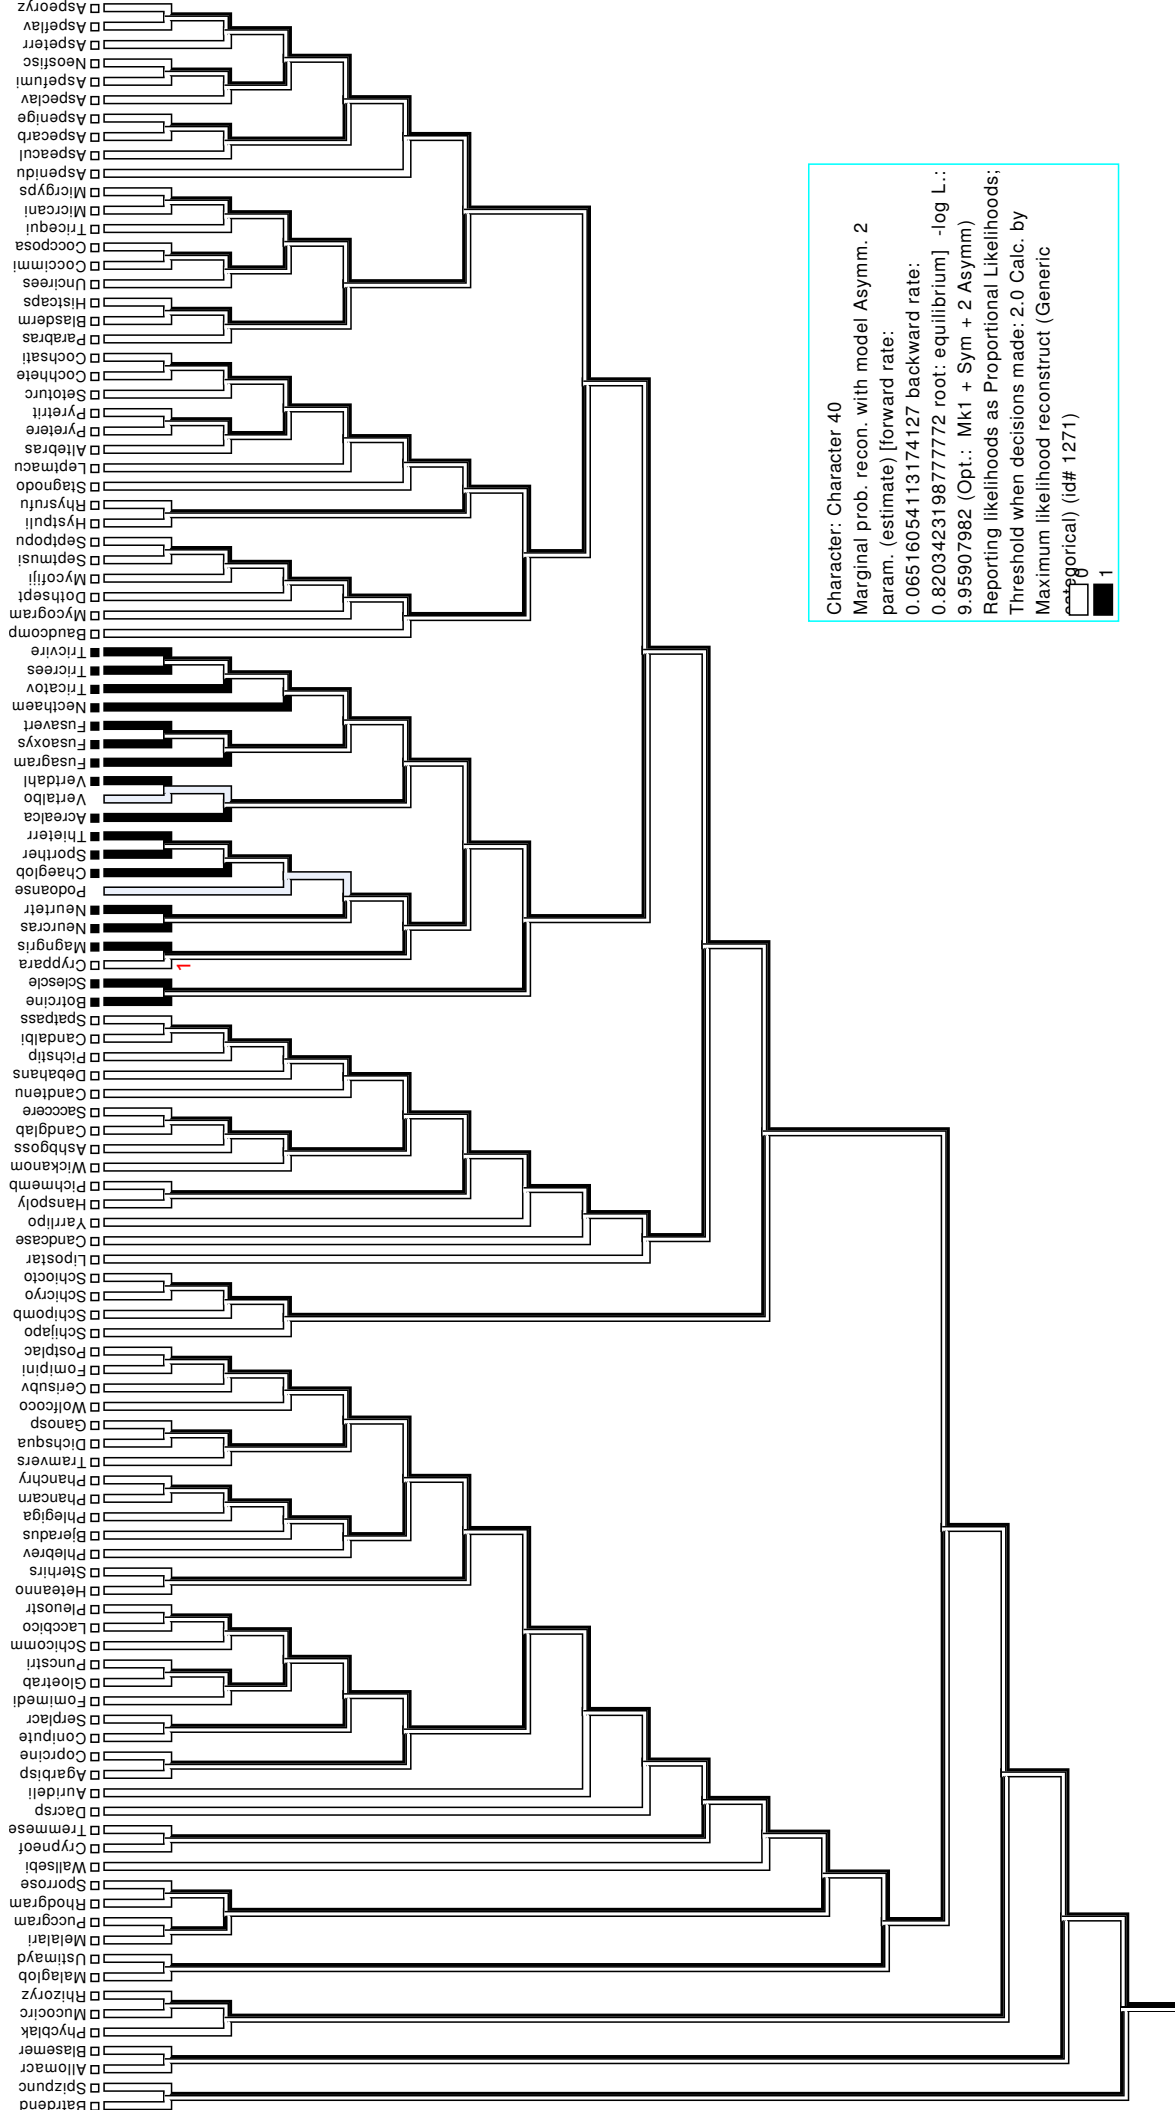

Character: Character 40  
 Marginal prob. recon. with model Asymm. 2  
 param. (estimate) [forward rate:  
 0.06516054113174127 backward rate:  
 0.820342319877772 root: equilibrium] -log L.:  
 9.95907982 (Opt.: Mk1 + Sym + 2 Asymm)  
 Reporting likelihoods as Proportional Likelihoods;  
 Threshold when decisions made: 2.0 Calc. by  
 Maximum likelihood reconstruct (Generic  
 algorithm) (id# 1271)

# Putative Fusion 40

September 26, 2012

## 1 Fasta Sequences

These are the unfused sequences identified by fdfBLAST belonging to the putative gene fusion in FASTA format. Accessions may be shortened, but belong to either the taxons individual genome project or NCBI's accession numbering.

```
>XP_0012734091Ascl_dom1
MVASAVRMRVPSAMLSKCALCMRRPQVVHRFKDAVQPQLPALAALSRYASKSFPPTII
SMPALSPTMSAGNIGAWQKKAGDSLVPDVLVEIETDKAQMDFEFQEEGVLAKVLKETGE
KDVAVGAPIAVLVEEGTDVSSFESFSLEDAGGDKGAAPAKETKEEPKADAAPAATPEPAP
EAYEPETSADKLQPSLDREPSISPAAKALALEKGVVVKALKGTGRGGQITKEDVEKYKPS
TSAAAAGPTYEDIPLTSMRKTIASRLQQSVRENPHFFVSTTSLVTKLLKLRQALNASSEG
KYKLSVNDFLVKACAAALLKVPVAVNSSWREENGQVVIRQHNAVDISVAVATPSGLITPVV
KDVQGLGLSSISNQIKDLGKRARENKPKPEEYQGGTFTISNMGMPAVERFTAVINPPQA
GILAVGTTTRKVAVPVETEETGTSVEWDDQIVVTGSFDHKVVDGAIGAEWIKELKKVVENPL
ELLLRAPNPTRYLNETAESTASLVDVDSPHVVSVDSDFLNQEVTQTQAERLEREAREE
>XP_0012734091Ascl_dom2
EERKERERAVEAEKAKAKAARAGHVAKRNPVFGNAIIYTLVGAALGYGAYRKHLEGRLS
WKLVGAWSGVVGAFGAVDYFVSNEVACHKSVLSHPNENISASQIAASLASLSRTIDDYSA
LSKKELIPAKQEKAFAFERVKNFRAELADYRTHFDRLRKEREEAQSVTNRNELLGRRPHAA
TPENPYAQSSLPQSSPFANASSRSGLSFGASPADFNRETHALREQSFFANTNTQLDEFL
DRGRAVLADLGQREVLKGTQRRLYSVANTLGISGDTIRRVERRAKQDKWIFWGGVLTFF
LFCWAVLHFLR
```

## 2 Annotated Phylograms

All trees were generated from an initial run of Darren's Orchard pipeline against 139 taxa (Table S1), using the above corresponding un-fused sequences as BLAST seeds. The alignments were then checked for any missing taxa, manually masked and then ProtTest3 was run, please see the Methods section for detail. The final trees were generated by the following command:

```
phyml -i alignment_file -d aa -b 100 -m model -c 8 -v invariant_sites -s BEST --quiet
-a gamma
```

Styling and annotation was made possible by Dendroscope and Inkscape.

## 3 Mesquite Cladogram

This tree is the 68-gene concatenated phylogeny (Fig. 1), with the presence of a fusion (black), presence of a fission (white), and absent/undetermined (grey) status of gene fusion characters plotted on to it using a "1/0/-" nexus-style data matrix. We used the program 'Mesquite' to calculate proportional likelihoods based on either an "Mk1" or "Assym. 2 param model." (see Table S4) of character change across the fungal phylogeny (Fig. 1). This allowed for a proportional likelihood of the position of the fusion/fission to be calculated.





Annotation

✓ Presence

✗ Absence

# Other Fusion

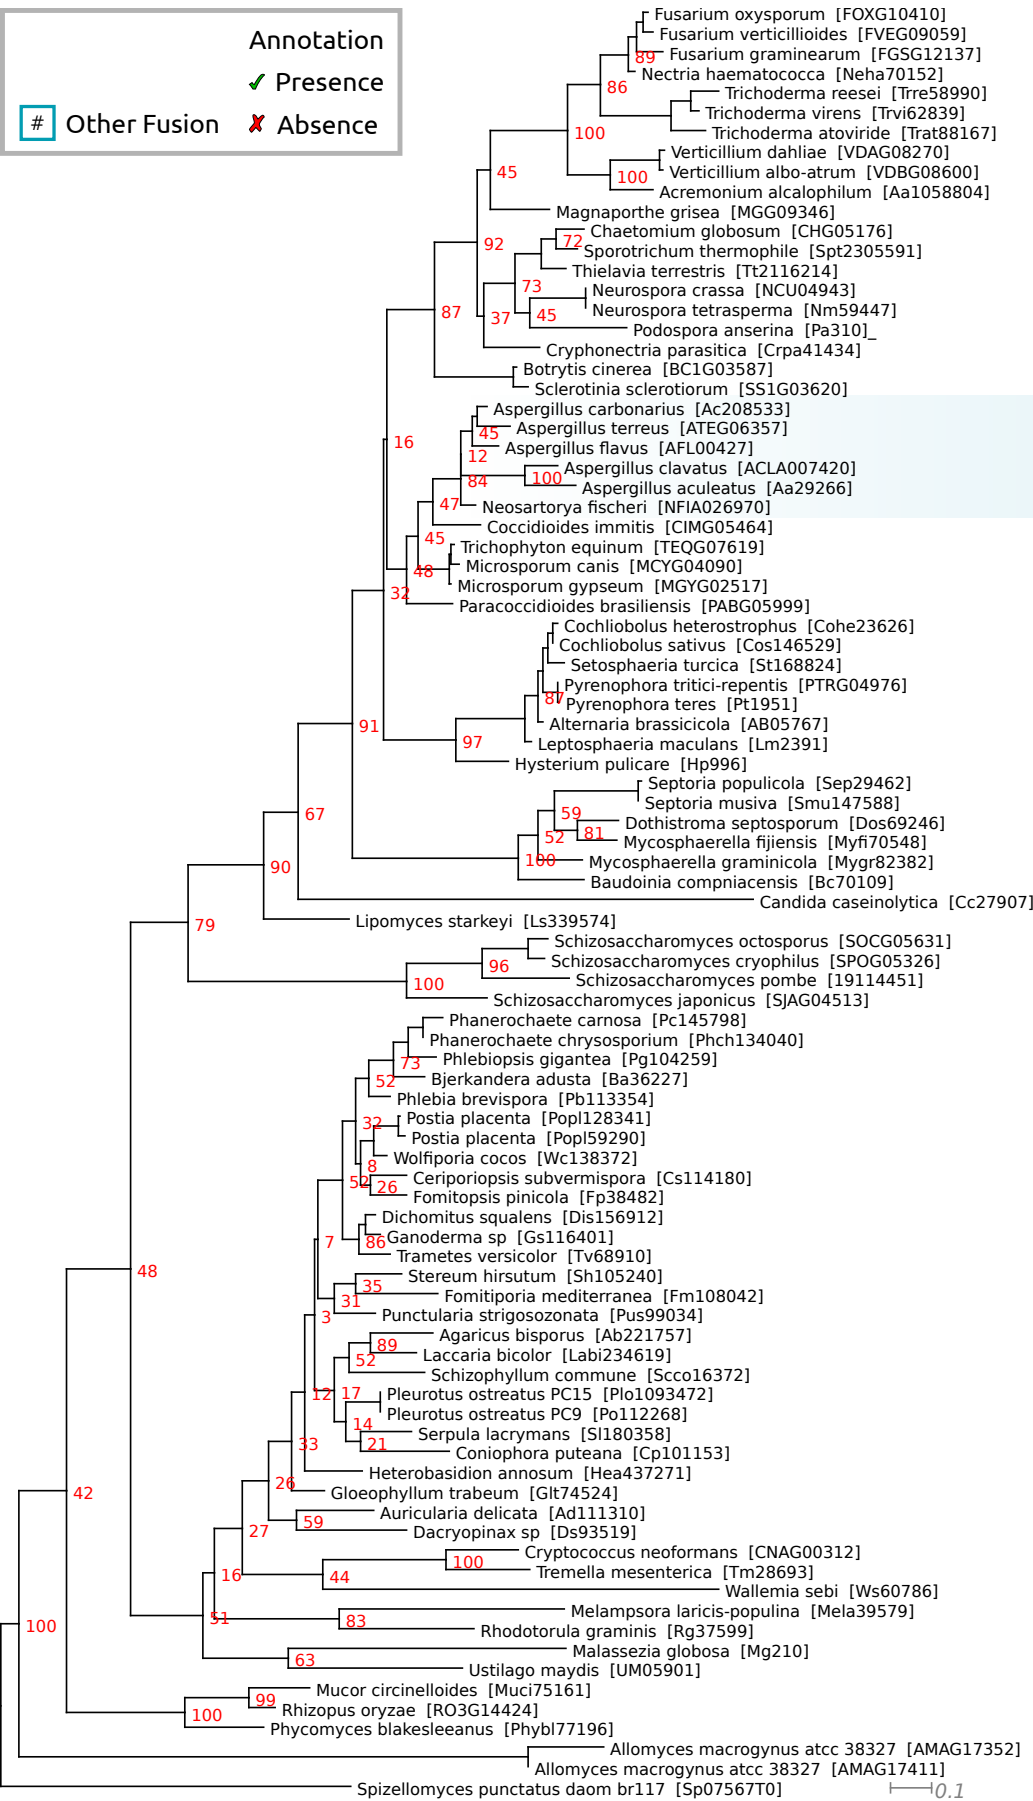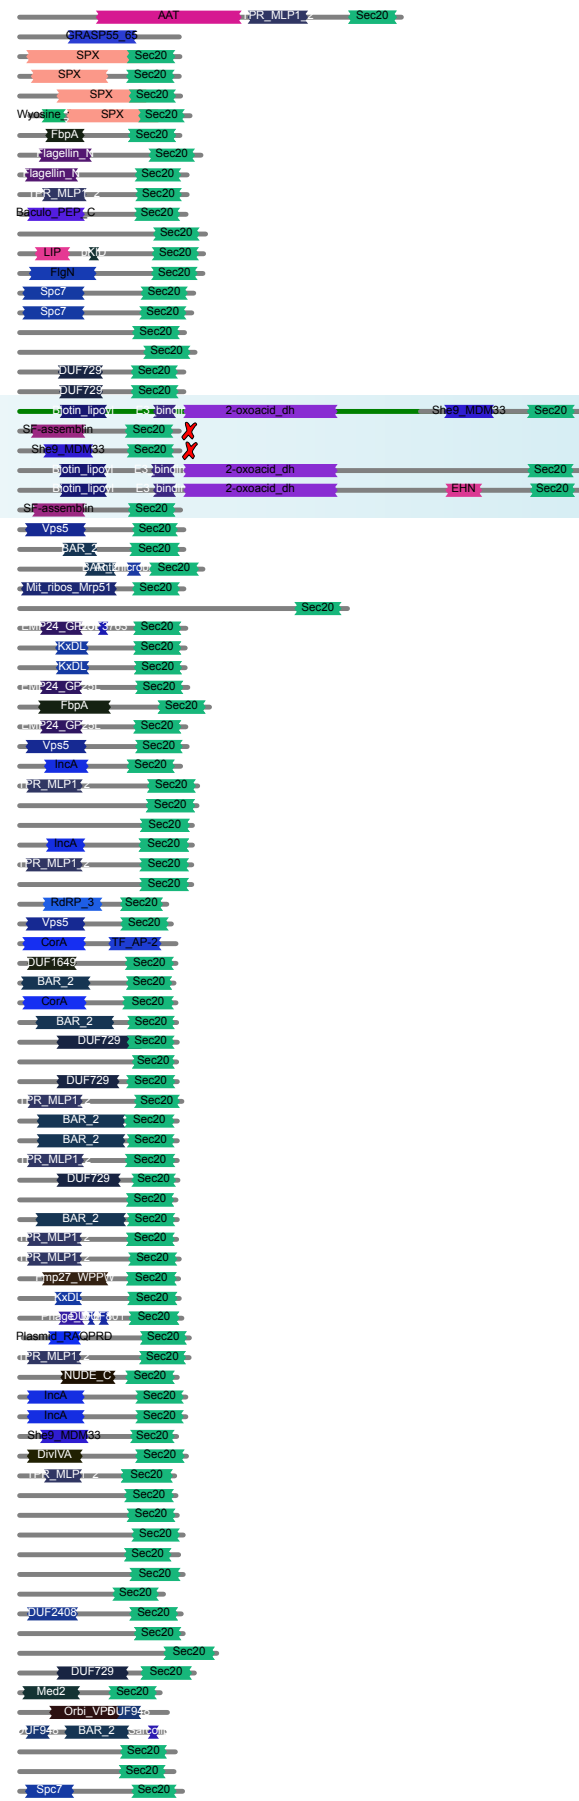



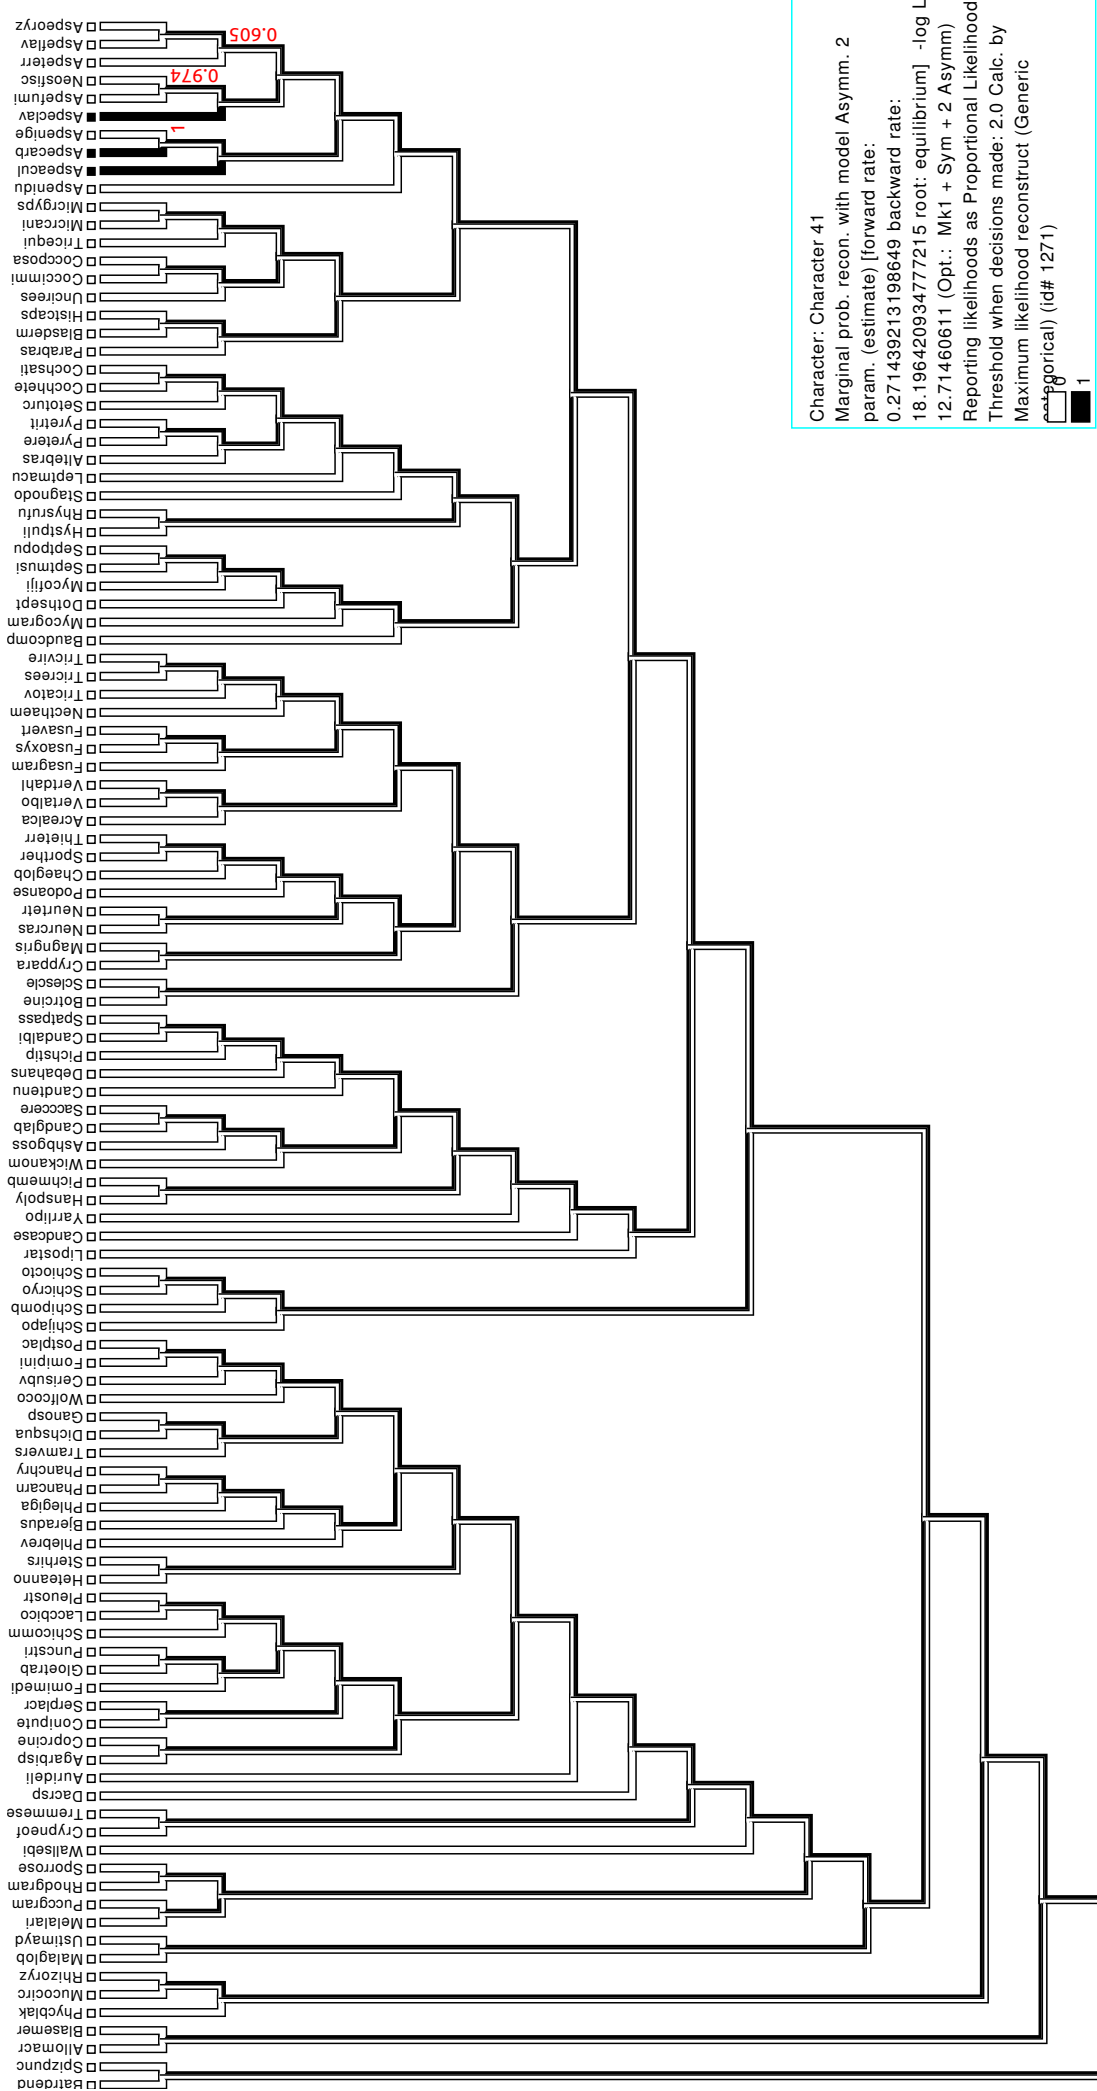

# Putative Fusion 41

September 27, 2012

## 1 Fasta Sequences

These are the unfused sequences identified by fdfBLAST belonging to the putative gene fusion in FASTA format. Accessions may be shortened, but belong to either the taxons individual genome project or NCBI's accession numbering.

```
>EGZ73980_F41
MSASPTACQDLARSVLENISGINRALNVTPDDVNGVDSDPKINETHDGHNDKATTEAGNE
AAGTVEAVKQEASRSPVESFHEPPFSWLQPHALFVIIMVGPEGMPFGIQKDFLCAKSSYY
RRYFREKAANNESVEDVVELRDASVDVFGYDQHYLYTGHVYPTPPDYEVLLIGIWKLGHS
LGIDGLCDATIDAMIEYRRITNSIPATALLVQVWDETPEGSSIRKLLLSWAADYMRASED
RAEFAKALPQEVLSLVVAMSSLDATPAPAAATPSSPVSQGVVNSAHQGWHDVANCDGEQ
ARPAKRARYSDAGHTNGAKATPNGRKGPRPSTTGPKTGQKRKYNVANGEVELTTSKKLA
FCDDLTRMLSGPGFWTRLVGPFRDPVNPESDGVDPDYFDKVAKPMDLQTMRAKMDRNEYA
DENEFLADMNQIFNNCYTYWAKKDPMWQACERLQKTFEDKYSQMSKWIAKMEGQEGSN
```

## 2 Annotated Phylograms

All trees were generated from an initial run of Darren's Orchard pipeline against 139 taxa (Table S1), using the above corresponding un-fused sequences as BLAST seeds. The alignments were then checked for any missing taxa, manually masked and then ProtTest3 was run, please see the Methods section for detail. The final trees were generated by the following command:

```
phym1 -i alignment_file -d aa -b 100 -m model -c 8 -v invariant_sites -s BEST --quiet -a gamma
```

Styling and annotation was made possible by Dendroscope and Inkscape.

## 3 Mesquite Cladogram

This tree is the 68-gene concatenated phylogeny (Fig. 1), with the presence of a fusion (black), presence of a fission (white), and absent/undetermined (grey) status of gene fusion characters plotted on to it using a "1/0/-" nexus-style data matrix. We used the program 'Mesquite' to calculate proportional likelihoods based on either an "Mk1" or "Assym. 2 param model." (see Table S4) of character change across the fungal phylogeny (Fig. 1). This allowed for a proportional likelihood of the position of the fusion/fission to be calculated.

# Annotation  
✔ Presence  
✘ Absence  
# Other Fusion

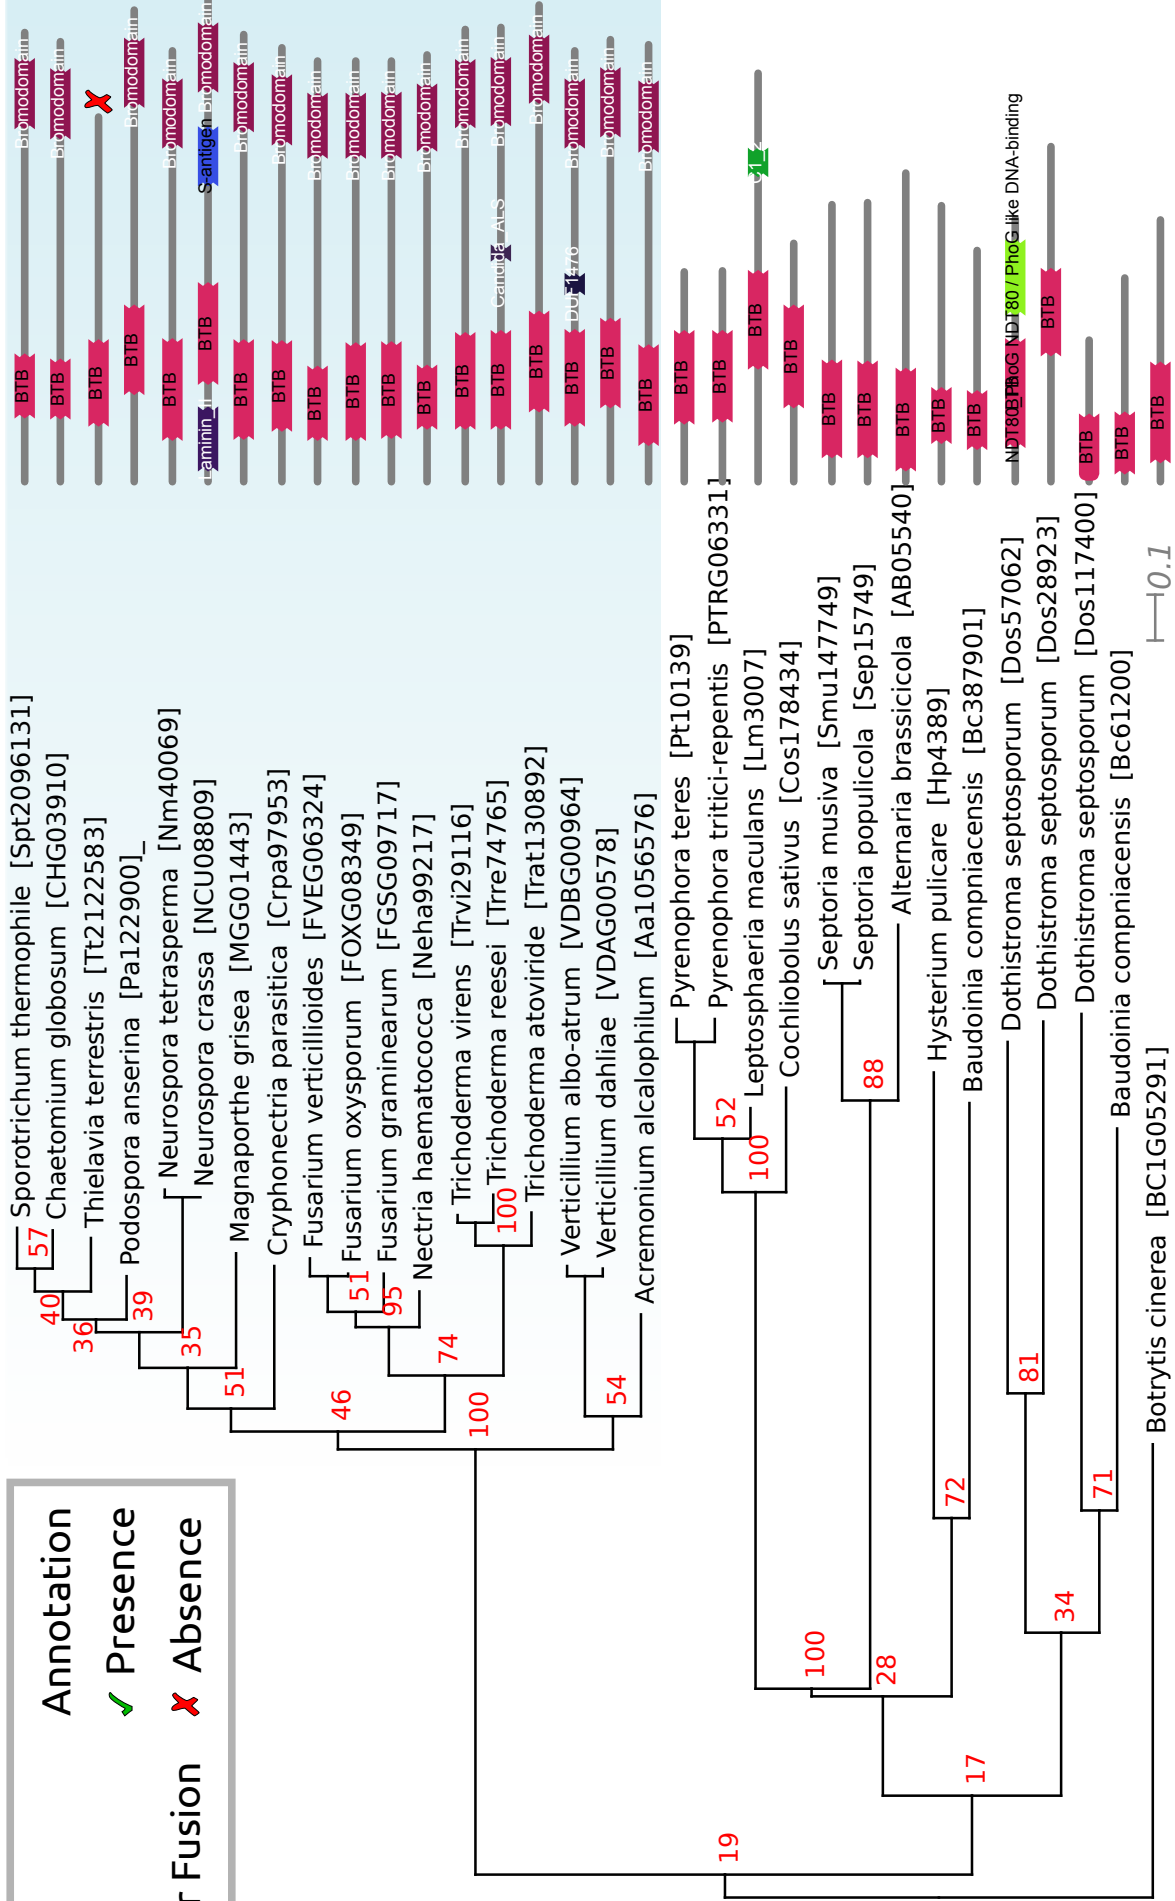

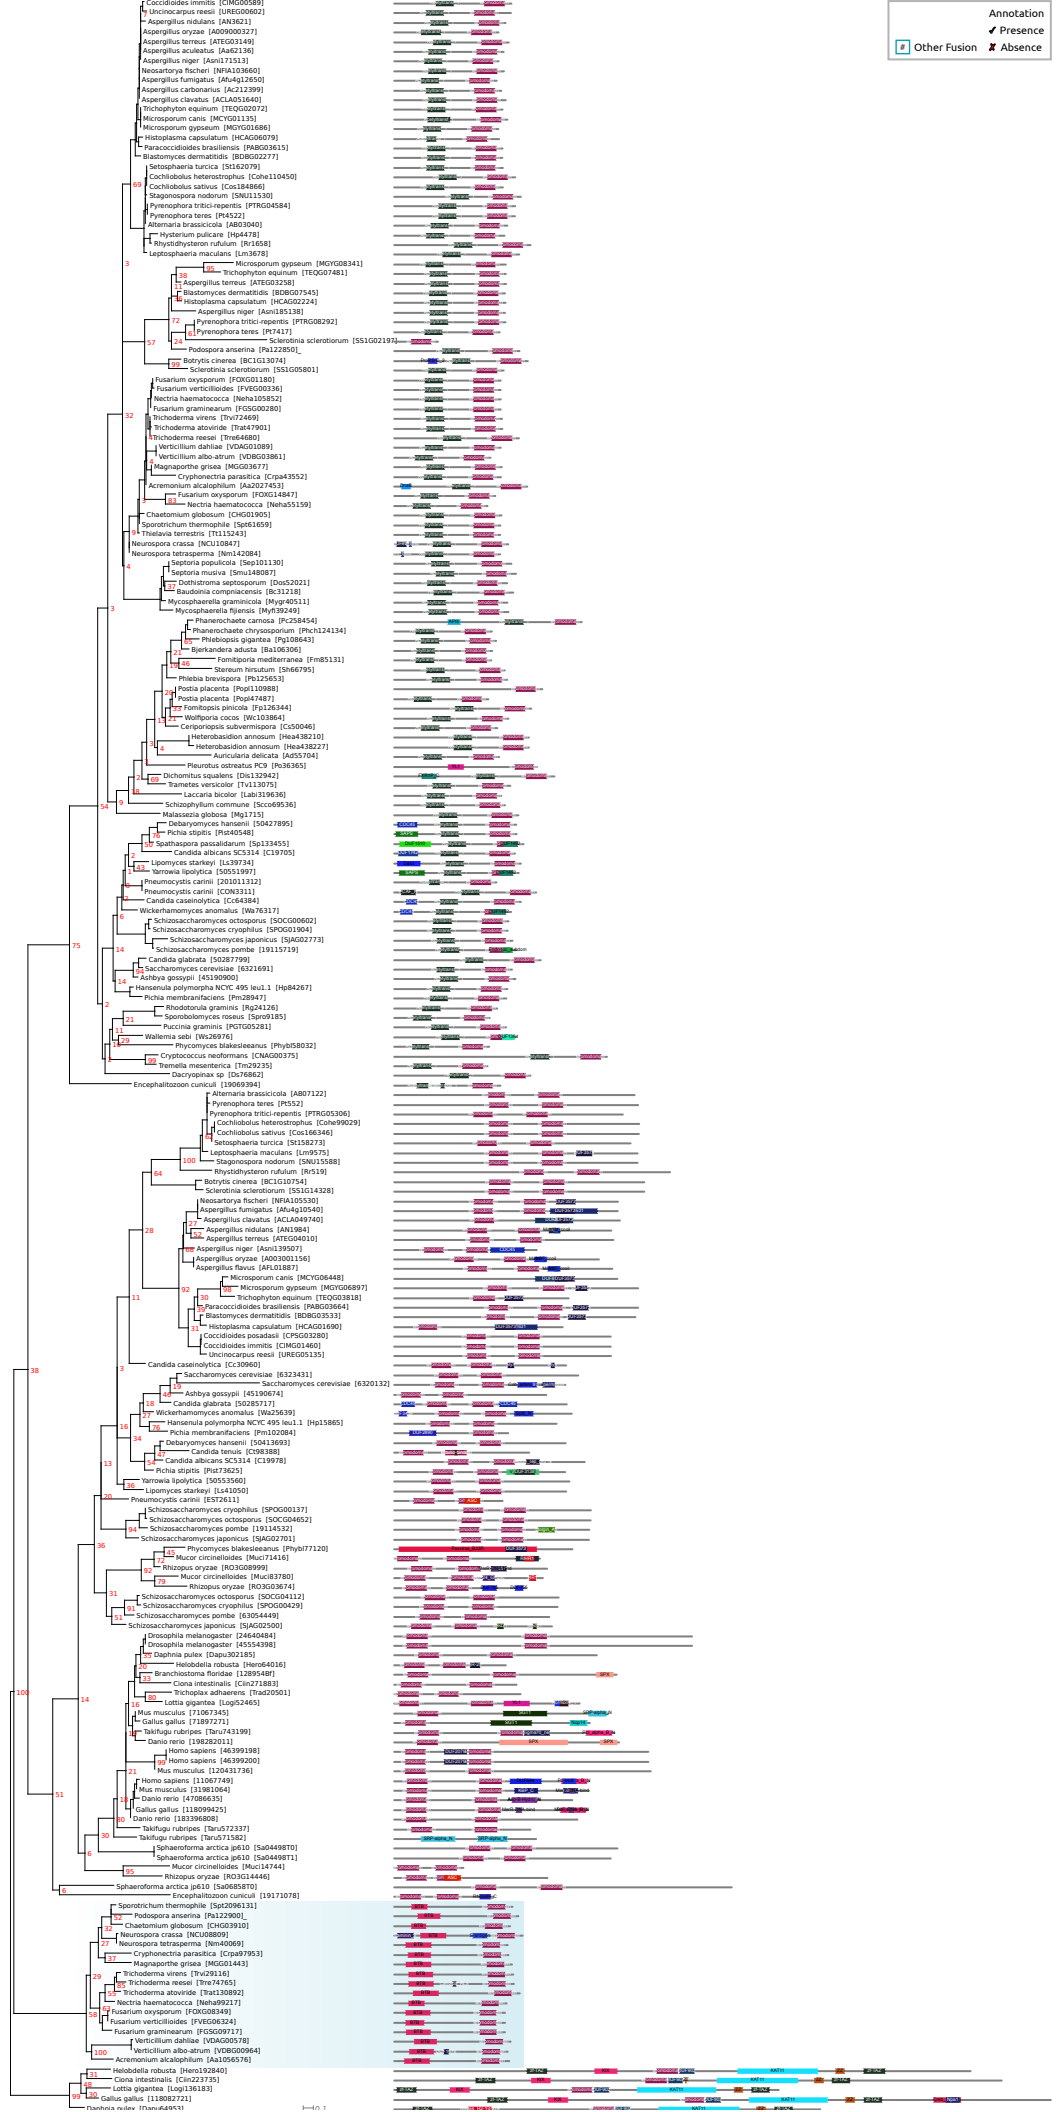

Annotation  
 ✓ Presence  
 ✗ Absence  
 Other Fusion

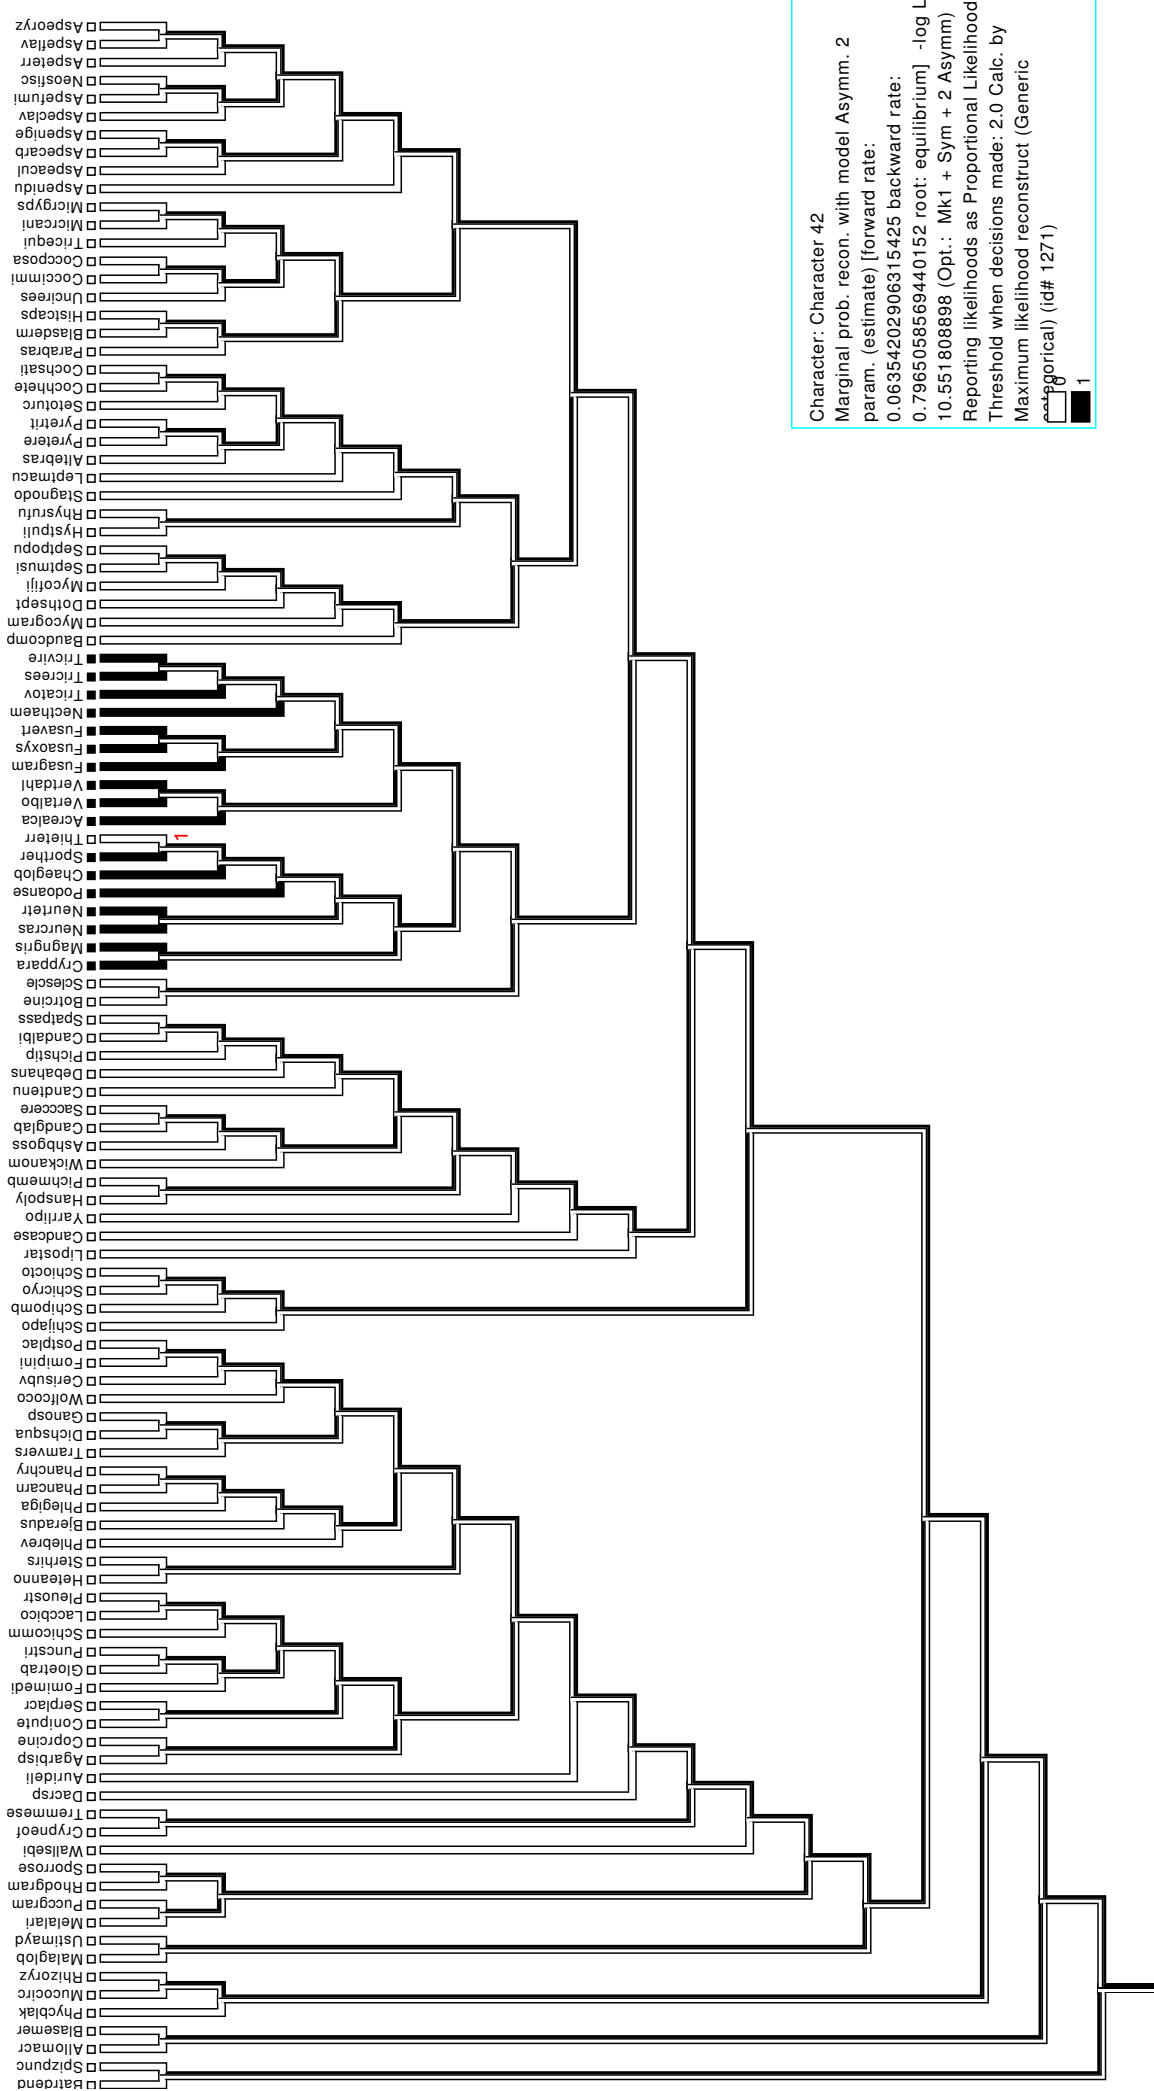

Character: Character 42  
 Marginal prob. recon. with model Asymm. 2  
 param. (estimate) [forward rate:  
 0.06354202906315425 backward rate:  
 0.7965058569440152 root: equilibrium] -log L.:  
 10.551808898 (Opt.: Mk1 + Sym + 2 Asymm)  
 Reporting likelihoods as Proportional Likelihoods;  
 Threshold when decisions made: 2.0 Calc. by  
 Maximum likelihood reconstruct (Generic  
 categorical) (id# 1271)

# Putative Fusion 42

September 27, 2012

## 1 Fasta Sequences

These are the unfused sequences identified by fdfBLAST belonging to the putative gene fusion in FASTA format. Accessions may be shortened, but belong to either the taxons individual genome project or NCBI's accession numbering.

```
>XP_0033012721Pyte_dom1
MAGRLSDMSASPRTGKRNRGILPPANQPTRL DCKLATPDTVRRESYNMSEERRPRSRF
DSDDNDRPVRSRFDTRRSRSPSRKESHRARSPIAREGNESPAATSLKNKAAAAAAAA
AARINAQIQAKKGIQHVEVPPIRSAPTPPAAVKSPSSNSAAAISNETYQQDGFIDKIEI
NDLRNRYTLTKGATQKRDFHAFSGSAALPFIGVVELESDSIKDETGADVTTTRGEYYPDKNM
ATATNPPLYLRITSTSTKEGLDKAIEMIEEMMKEDLPNLVDERRFRREPENFERDEFGRR
KWPEEKISVNLEPINGFNLRQVVGRRGGDNVKYIQQETGCKVQIKGRGSGFMENSGQES
DEPMLHIAGPRPEGVAYAKQLCEELLEKVKTDYHAYKERPPPNRYGDRDGYSGRPGYG
DRGDRGDRERNNSYGYGGGGGGGGGGYGGGAGGYGGQGGYGGHNGYAAQDTLMSPAAAT
PTADANAQAYDANATQAAWAAYYAQNPEADPYAAAYGGYQAYMQYAAAYYAQSGYGQTQSP
APAPGAGAAAPPPPPPSDGYGAPPPPPPPAASPPNYGATRLLSLRQTSLQTQRCLATSH
>XP_0033012721Pyte_dom2
NPPTARNVDIASRTPPYAKLLSRLEEVRRVLGSSRQLTLAEKILYSHLDSPEESLLSNTN
GGRDVRGQANLKLKPDVAMQDASQMALQFMSCGLPSTAVPASIHC DHLIVGEKGADT
DLPQSITGNKEIFDFLESAAKKGIEFWPPGAGIIHQSVLENYSAPGLMMLGTD SHSPNA
GGLGAIIVIGVGGADAVDALVDAPWELKAPKILGVKLTGELSGWASPKDVILKLAGQLTVR
GGTGFIIEYFGPGVQTL SCTGMATICNMGAEVGATTSLFPFSPAHI PYLQATHRGPIAEA
AAKIAQSPMQNLLRPDPEAVYDKVIEINLSELEPHINGPFTPDLSTPLSKFKSVVEENG
WPKTFGAGLIGSCTNSSYQDMTRSEIIVKQASAAAGLKPRADFFITPGSEQIRATLERDDT
LSTFTEAGGTRTDEVKKGESNAILTSYNRNFPGRNDGNRATMNF LASPELITAMSYSGST
TFNPMTDSIPTSPGEPFKFAPPKGS DLPSAGFADGNPDMFPTPGVDPDPSVEVVVSPTSSR
LALLDPFPAFPDSDFTGLRVLYKVKGQCTTDTISAAGPWLKYKGHLPNISENTLIGAVNA
QTDEVNVAYDV DGTSSIPELAKRWRDQGV EWL VVAEHNYGEGSAREHAALQPRYLGGRI
ILAKSFARIHETNLKKQGI IPLTFANEADYDLFAACDEVATRGLLDVLRSGGKGEVELVL
KKKDGSEKVIKTKHTLSHDQCGFVLAGSALNLLARQG REIKEEVTRSAELTD
```

## 2 Annotated Phylograms

All trees were generated from an initial run of Darren's Orchard pipeline against 139 taxa (Table S1), using the above corresponding un-fused sequences as BLAST seeds. The alignments were then checked for any missing taxa, manually masked and then ProtTest3 was run, please see the Methods section for detail. The final trees were generated by the following command:

```
phym1 -i alignment_file -d aa -b 100 -m model -c 8 -v invariant_sites -s BEST --quiet -a gamma
```

Styling and annotation was made possible by Dendroscope and Inkscape.

## 3 Mesquite Cladogram

This tree is the 68-gene concatenated phylogeny (Fig. 1), with the presence of a fusion (black), presence of a fission (white), and absent/undetermined (grey) status of gene fusion characters plotted on to it using a "1/0/-" nexus-style data matrix. We used the program 'Mesquite' to calculate proportional likelihoods based on either an "Mk1" or "Assym. 2 param model." (see Table S4) of character change across the fungal phylogeny (Fig. 1). This allowed for a proportional likelihood of the position of the fusion/fission to be calculated.





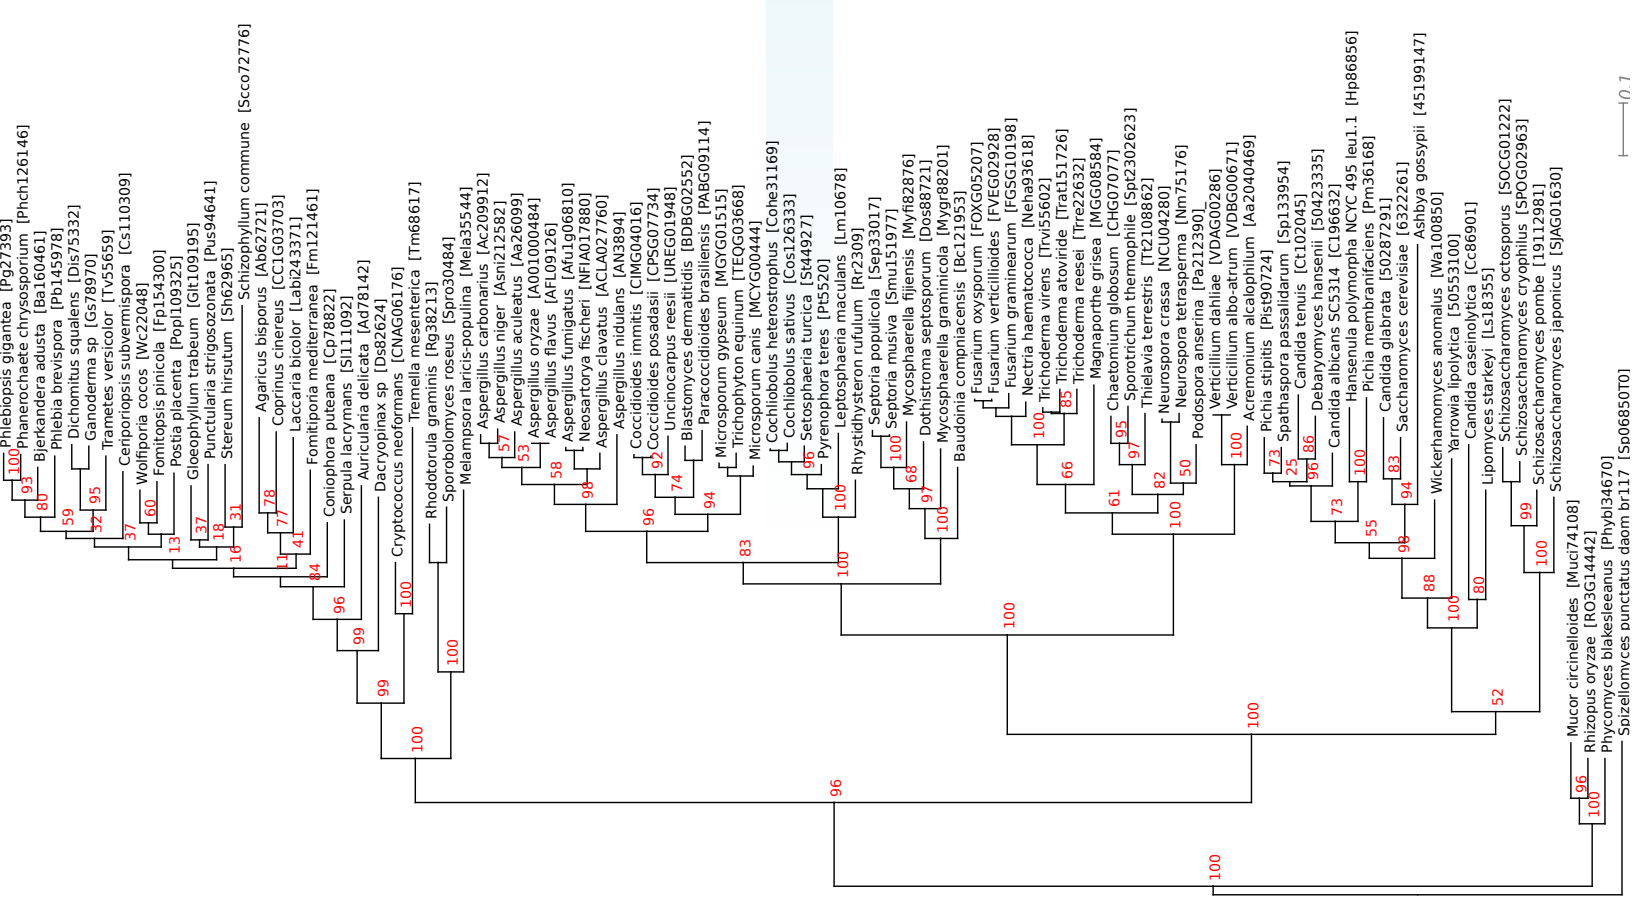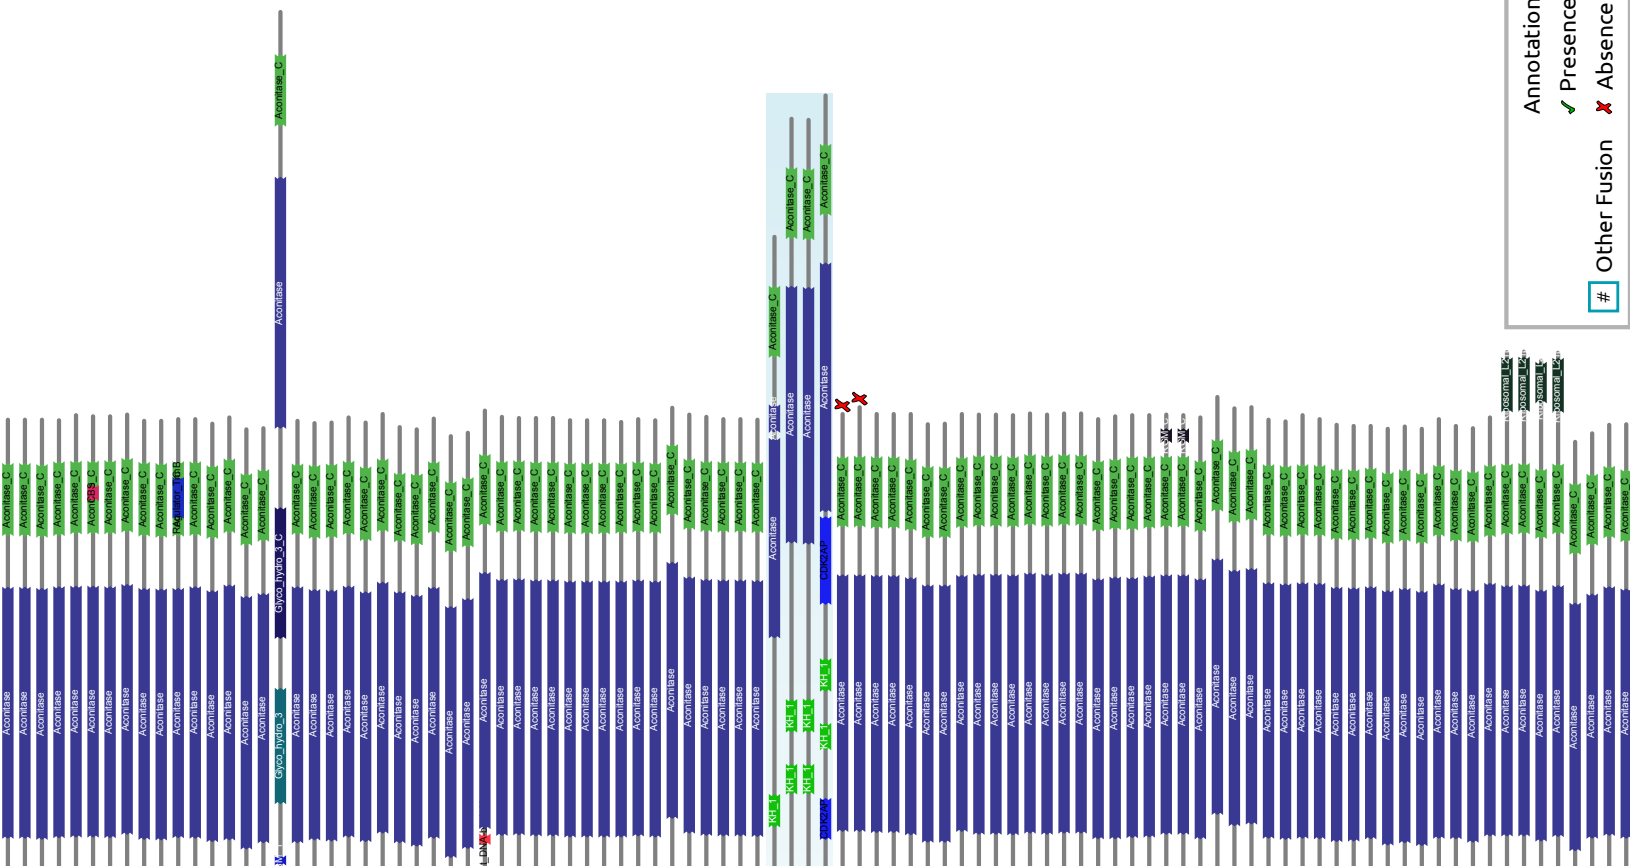

Annotation

✓ Presence

✗ Absence

# Other Function

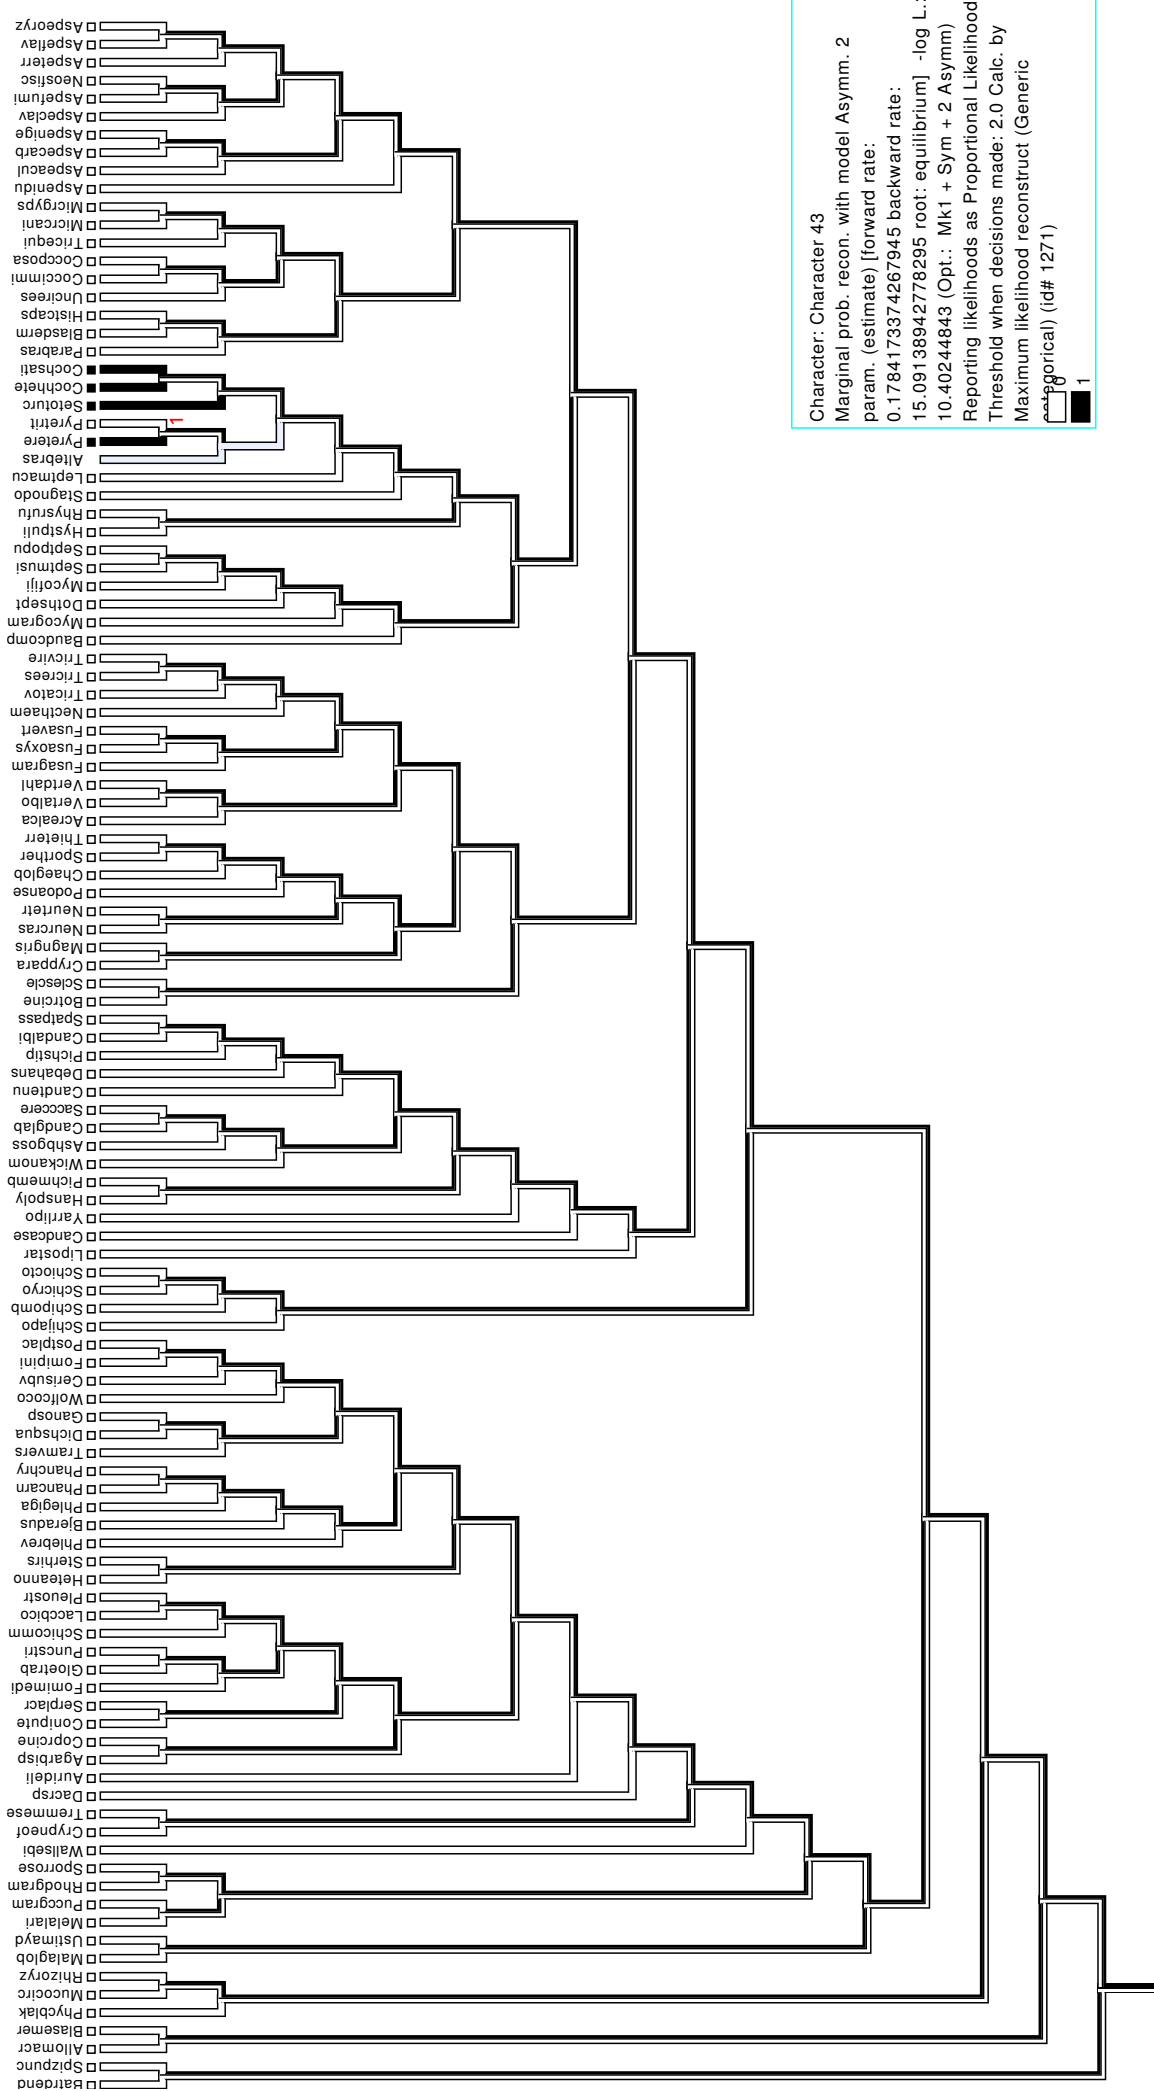

Character: Character 43  
 Marginal prob. recon. with model Asymm. 2  
 param. (estimate) [forward rate:  
 0.1784173374267945 backward rate:  
 15.09138942778295 root: equilibrium] -log L:  
 10.40244843 (Opt.: Mk1 + Sym + 2 Asymm)  
 Reporting likelihoods as Proportional Likelihoods;  
 Threshold when decisions made: 2.0 Calc. by  
 Maximum likelihood reconstruct (Generic  
 categorical) (id# 1271)

# Putative Fusion 43

September 27, 2012

## 1 Fasta Sequences

These are the unfused sequences identified by fdfBLAST belonging to the putative gene fusion in FASTA format. Accessions may be shortened, but belong to either the taxons individual genome project or NCBI's accession numbering.

```
>XP_0033035321Pyte_dom1
MFGSSQDRARQLAGRNRRERISSISSCSSSRVSSSSRAPPLRNRQSTLDSTIPSPSAVE
EHAACDESGTILGPHALEGQNHLEEGPPVSALQLASGQGGSQVEQHRRQAEHLSQVLY
NGFALEPSVSPPPQSQFSLSHQTRHSTMGSQLDTALRLRNITASDPSSHLIDPSLLKLLDS
FNATTGISRLASMPDHDPSTLTTVSLRGEGDIPLPAPYFPNRRSDYGDYVAWKRHYRRL
MFRLLDLVSGAYHRTFSQQRQHFITPDFCAELQFLSQIPNSPNILVTSGYEYYGNVTGPN
PVASSSATKSTLNTLFNNYVEAGAQDKDIVGVEGTMQYFVEVDVDAEGLDALVALEIVQA
PTIGEMSREGFVNGWSEKCDTVDKQKRYIKTLKREMPGSKDLFTRVYRHTFPIAKTAGQ
KAVALDVALVYWELLFSSPLSAVKWSSPNTPWLTWWTEFLTTSYKKS VNKDMWNETLKFA
>XP_0033035321Pyte_dom2
QLTLEDEAMSFWTEESSWPSVIDDFVDWVKKEKRGDVPEEMVAAKHHVPIVKKHRKRFNR
HQSDRFMCVDPSWRKPKGIDNRVRRRFKQQAAMPKIGYGSNRKTRHMMPSGHKAFVNNV
ADVLLLLMHNSTFAAEIAHAVSARKRIDIIARAKQIGVKVTNGKARVKTES
```

## 2 Annotated Phylograms

All trees were generated from an initial run of Darren's Orchard pipeline against 139 taxa (Table S1), using the above corresponding un-fused sequences as BLAST seeds. The alignments were then checked for any missing taxa, manually masked and then ProtTest3 was run, please see the Methods section for detail. The final trees were generated by the following command:

```
phym1 -i alignment_file -d aa -b 100 -m model -c 8 -v invariant_sites -s BEST --quiet -a gamma
```

Styling and annotation was made possible by Dendroscope and Inkscape.

## 3 Mesquite Cladogram

This tree is the 68-gene concatenated phylogeny (Fig. 1), with the presence of a fusion (black), presence of a fission (white), and absent/undetermined (grey) status of gene fusion characters plotted on to it using a "1/0/-" nexus-style data matrix. We used the program 'Mesquite' to calculate proportional likelihoods based on either an "Mk1" or "Assym. 2 param model." (see Table S4) of character change across the fungal phylogeny (Fig. 1). This allowed for a proportional likelihood of the position of the fusion/fission to be calculated.

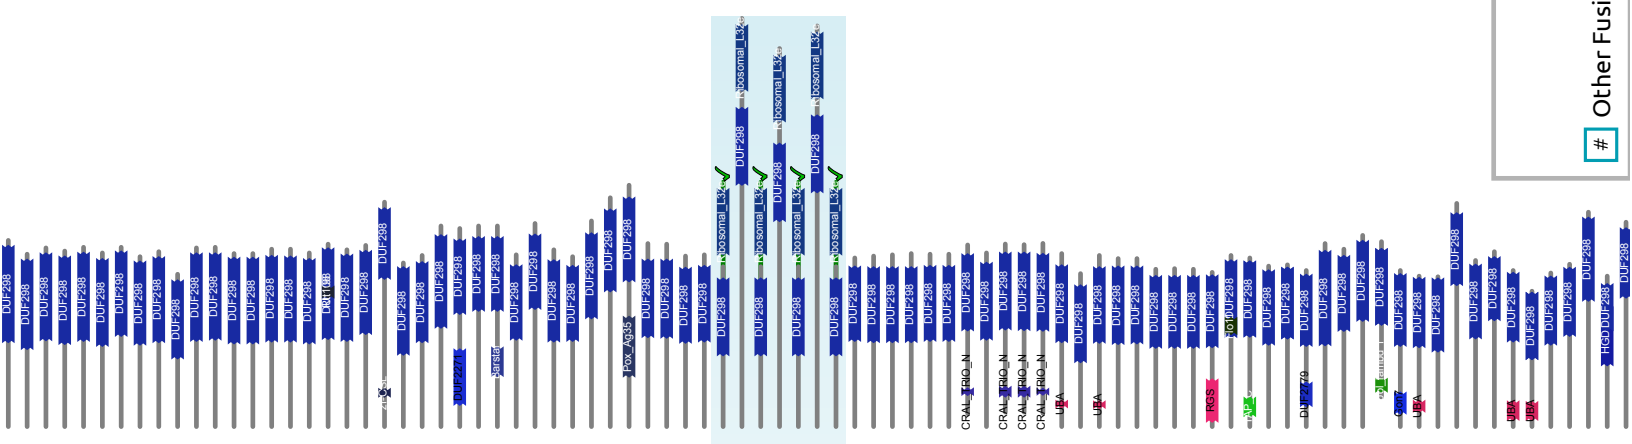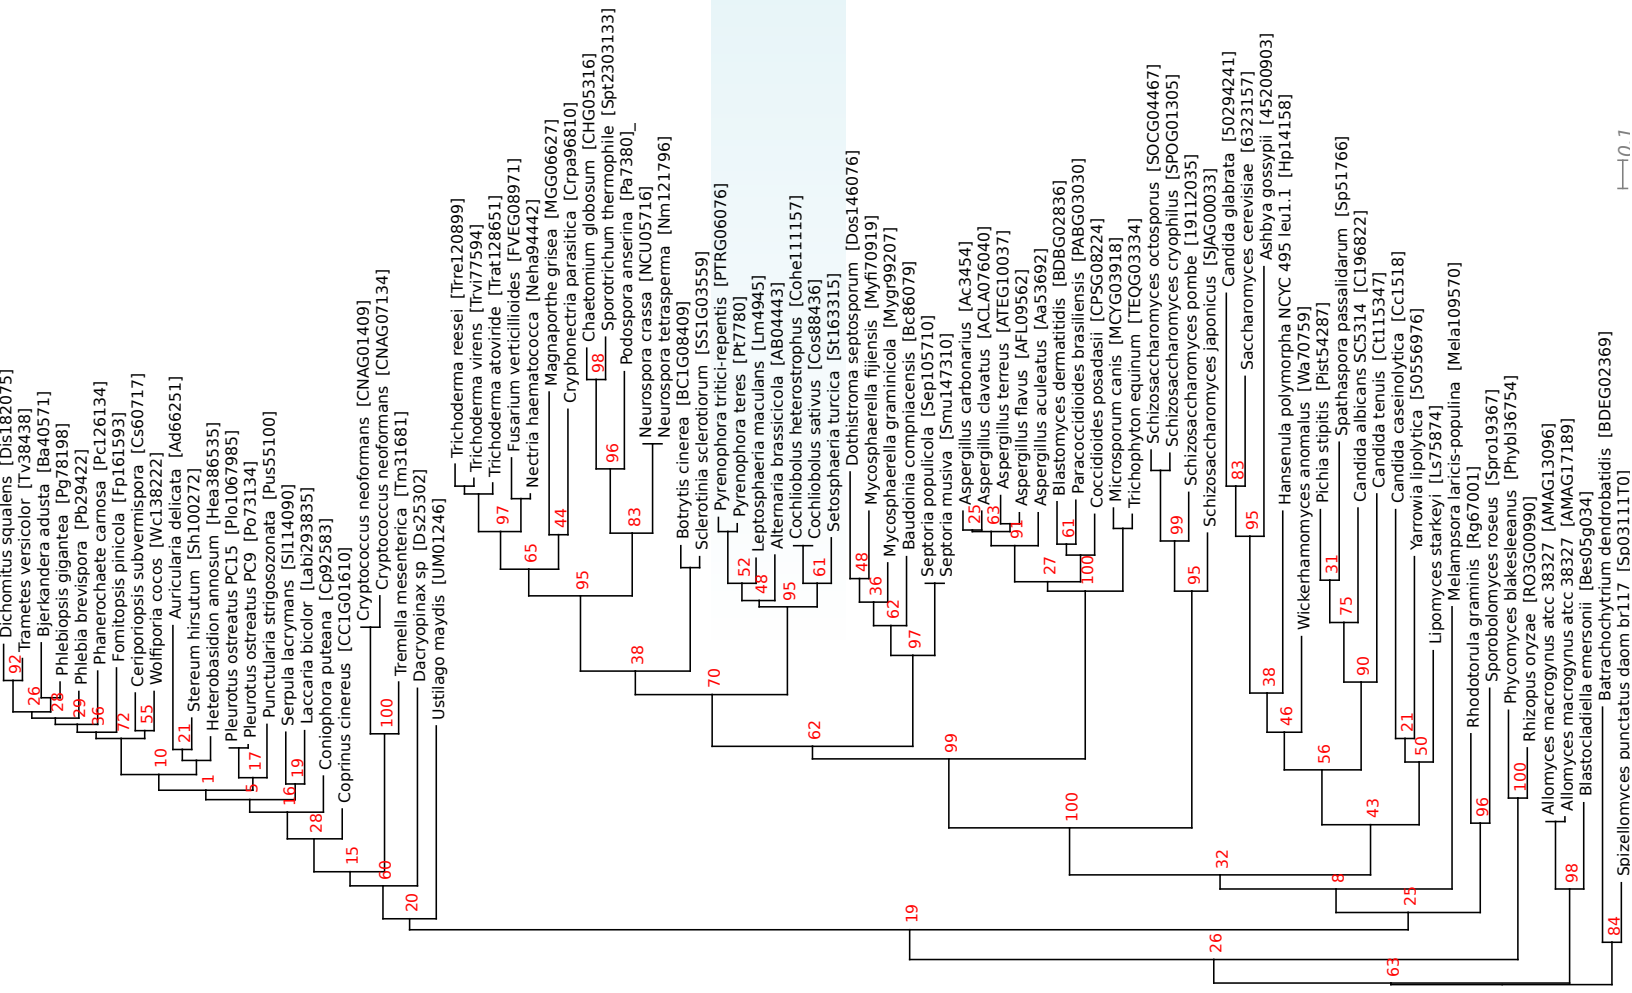

92 Dichomitus squalens [Dis1820751]  
 26 Trametes versicolor [TV38438]  
 74 Bjerkandera adusta [Ba40571]  
 71 Phlebiopsis gigantea [Pg78198]  
 29 Phlebia brevispora [Pb29422]  
 96 Phanerochaete carnea [Pc126134]  
 72 Fomitopsis pinicola [Fp161593]  
 55 Ceriporiopsis subvermispora [Cs60717]  
 10 Wolfiporia cocos [Wc138222]  
 21 Auricularia delicata [Ad66251]  
 21 Stereum hirsutum [Sh100272]  
 1 Heterobasidium annosum [Hea386535]  
 5 Pleurotus ostreatus PC15 [Plo1067985]  
 17 Pleurotus ostreatus PC9 [Po73134]  
 16 Punctularia strigosozonata [Pus55100]  
 19 Serpula lacrymans [Sl114090]  
 28 Laccaria bicolor [Labi293835]  
 15 Coniophora puteana [Cp92583]  
 66 Coprinus cinereus [CC1G01610]  
 100 Cryptococcus neoformans [CNAG01409]  
 100 Tremella mesenterica [Tm31681]  
 20 Dacryopinax sp [Dsz25302]  
 100 Ustilago maydis [UM01246]  
 97 Trichoderma reesei [Trre120899]  
 97 Trichoderma virens [Tvt177594]  
 97 Trichoderma atroviride [Ttat128651]  
 65 Fusarium verticillioides [FVEG08971]  
 44 Nectria haematococca [Neha94442]  
 95 Magnaporthe grisea [MG06627]  
 98 Cryptonectria parasitica [Cpa96810]  
 96 Chaetomium globosum [CHG05316]  
 96 Sporotrichum thermophile [Spt2203133]  
 83 Podospora anserina [Pa7380]  
 83 Neurospora crassa [NCU05716]  
 83 Neurospora tetrasperma [Nm121796]  
 38 Botrytis cinerea [BC1G08409]  
 70 Sclerotinia sclerotiorum [SS1G03559]  
 70 Pyrenophora tritici-repentis [PTRG06076]  
 52 Pyrenophora teres [Pt7780]  
 48 Leptosphaeria maculans [Lm4945]  
 48 Alterna brassicicola [AB04443]  
 95 Cochliobolus heterostrophus [Cohe111157]  
 61 Cochliobolus sativus [Cos88436]  
 62 Setosphaeria turcica [St163315]  
 48 Dothistroma septosporum [Dosi46076]  
 36 Mycosphaerella fijensis [Myf70919]  
 62 Mycosphaerella graminicola [Mygr9207]  
 97 Baudoinia compniacensis [Bc86079]  
 97 Septoria populiicola [Sep105710]  
 99 Septoria musiva [Smu147310]  
 25 Aspergillus carbonarius [Ac3454]  
 63 Aspergillus clavatus [ACLA076040]  
 63 Aspergillus terreus [ATEG10037]  
 91 Aspergillus flavus [AF109562]  
 27 Aspergillus aculeatus [Aa53692]  
 61 Blastomyces dermatitidis [BDBG02836]  
 100 Paracoccidioides brasiliensis [PABG03030]  
 100 Coccidioides posadasii [CPSG08224]  
 100 Microsporium canis [MCYG03918]  
 100 Trichophyton equinum [TEQG03334]  
 99 Schizosaccharomyces octosporus [SOCCG04467]  
 99 Schizosaccharomyces cryophilus [SPOG01305]  
 99 Schizosaccharomyces pombe [19112035]  
 95 Schizosaccharomyces japonicus [SJAG00033]  
 83 Candida glabrata [50294241]  
 95 Saccharomyces cerevisiae [6323157]  
 38 Ashbya gossypii [45200903]  
 46 Hansenula polymorpha NCYC 495 leu1.1 [Hp14158]  
 38 Wickerhamomyces anomalus [Wa70759]  
 31 Pichia stipitis [Pist54287]  
 75 Spathaspora passalidarum [Sp51766]  
 90 Candida albicans SC5314 [C196822]  
 90 Candida tenuis [Ct115347]  
 21 Candida caseinolytica [Cc1518]  
 50 Yarrowia lipolytica [Ls75874]  
 21 Lipomyces starkeyi [Ls75874]  
 56 Melampsora laricis-populina [Mela109570]  
 43 Rhodotorula graminis [Rg67001]  
 96 Sporobolomyces roseus [Spro19367]  
 100 Phycomyces blakesleeanus [Phyb136754]  
 100 Rhizopus oryzae [RO3G00990]  
 98 Allomyces macrogynus atcc 38327 [AMAG13096]  
 98 Allomyces macrogynus atcc 38327 [AMAG17189]  
 98 Blastocladiella emersonii [Bes059034]  
 84 Batrachyrium dendrobatis [BDEG02369]  
 84 Spizellomyces punctatus daom br117 [Sp031110]

# Other Fusion  
 ✓ Presence  
 ✗ Absence  
 Annotation

Annotation

✓ Presence

✗ Absence

# Other Fusion

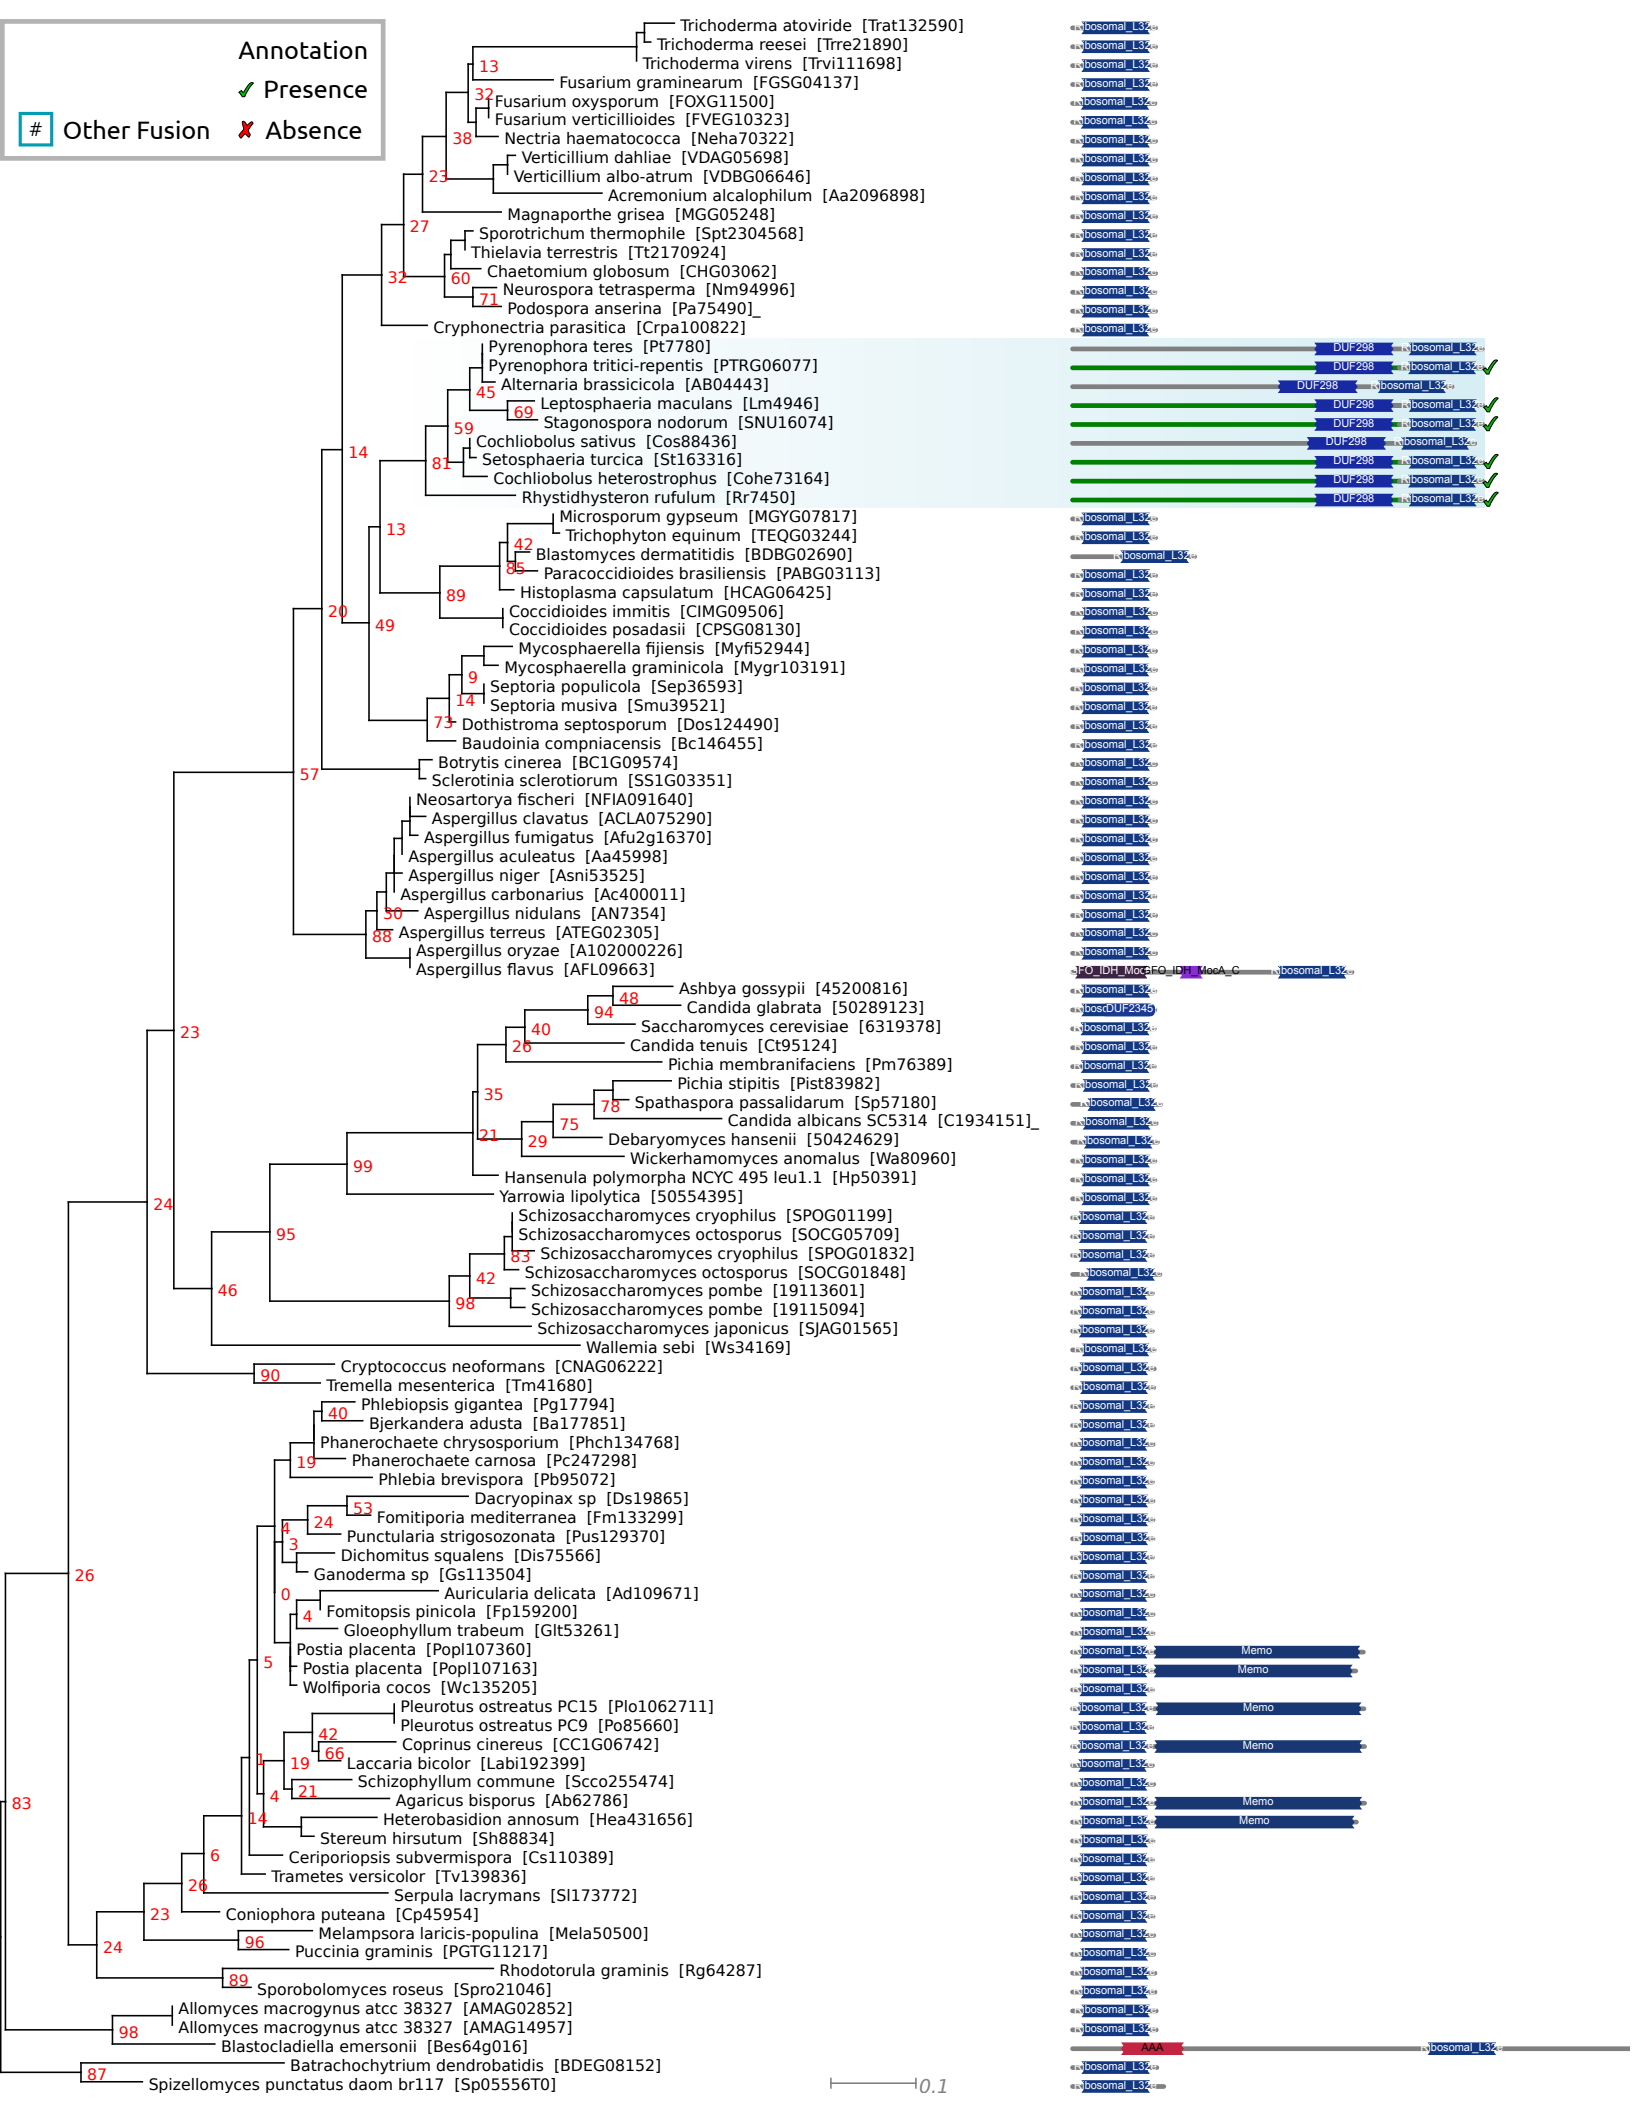

0.1



# Putative Fusion 44

September 27, 2012

## 1 Fasta Sequences

These are the unfused sequences identified by fdfBLAST belonging to the putative gene fusion in FASTA format. Accessions may be shortened, but belong to either the taxons individual genome project or NCBI's accession numbering.

```
>EHA223441Asni_dom1
MDGNPSTPPRRSALVLYGSETGNSQEVAEELGALAERLHFHTHVGEMNEYRPEVLKSHTL
VIFVVATTGQGFANARSFWRSLKRLPGDFLDGVQFASFGLGDSSYPKFNWAARKLH
KRLQLGANEIYDAGEADQHPGWPPIPDVQLPPKWILKLQEGNAATAQEGHAVPGTHE
NLPAPEENPKLTRLHDRLPLDPTLTATLRENKRLTPQKHWDVVRHVSLTVPEHTSYVPG
DMLCITPKNFSADVDALIQMMGWEDKADQLICLVPNSHIPADDLPLPPIRGLDSYPQLTL
RALLTDYLDIQAIPRRSFFAEIAHYTNDEMCKERLLEFTYTSPEYLDELWDYTTRPRRSI
LEVLHEFDTVKVPWQHAISSVFPVLKGRQFSIASGGELKRGPEGGTFELMIAIVKYQTVI
KKIRQGVCTRYISALRPGSTLKVQLQRGGLNSSVNQLVGPTVLVPGTGLAPLRSMLEK
AAIKAYQEEENPGVELGIGPTLLLYGGRNREADFFFEDEWQQLGQLTKLNVLTAFSRDQK
QKVYVQDVIRQNYALLFKLLHDMAGSVYICGSSGQMPKAVREALTEAFQHGAEVETDRFN
>EHA223441Asni_dom2
EQGAEQYLLGMEKTGRAAAAPTDRCLSTLPSKRLRLARLKIPLPHNIVIMSGLRILVPVKR
VIDYAVKPRVNKANTGVETAGVKHSLNPFDELSVEEAIRLRERGAQNQSPMKVENILALS
AGGAKCADTLRTAMAMGADRAFHVDVGEVDPGGPEPLTIKMLQGVVVKSENINLVLLGKQ
AIDGDGGQTGQMLAGLLGWPQATQASKVDIKDADGTVEVTHEVDGGVETLRAKLPVIT
DLRLNEPRYATLPNIMKAKKKPLEKKTLDGFGVEDKKRLKTLKVTEPPARQGGGKVEDVD
GLIGLKLKELGAL
```

## 2 Annotated Phylograms

All trees were generated from an initial run of Darren's Orchard pipeline against 139 taxa (Table S1), using the above corresponding un-fused sequences as BLAST seeds. The alignments were then checked for any missing taxa, manually masked and then ProtTest3 was run, please see the Methods section for detail. The final trees were generated by the following command:

```
phymml -i alignment_file -d aa -b 100 -m model -c 8 -v invariant_sites -s BEST --quiet -a gamma
```

Styling and annotation was made possible by Dendroscope and Inkscape.

## 3 Mesquite Cladogram

This tree is the 68-gene concatenated phylogeny (Fig. 1), with the presence of a fusion (black), presence of a fission (white), and absent/undetermined (grey) status of gene fusion characters plotted on to it using a "1/0/-" nexus-style data matrix. We used the program 'Mesquite' to calculate proportional likelihoods based on either an "Mk1" or "Assym. 2 param model." (see Table S4) of character change across the fungal phylogeny (Fig. 1). This allowed for a proportional likelihood of the position of the fusion/fission to be calculated.



Annotation

✓ Presence

✗ Absence

# Other Fusion

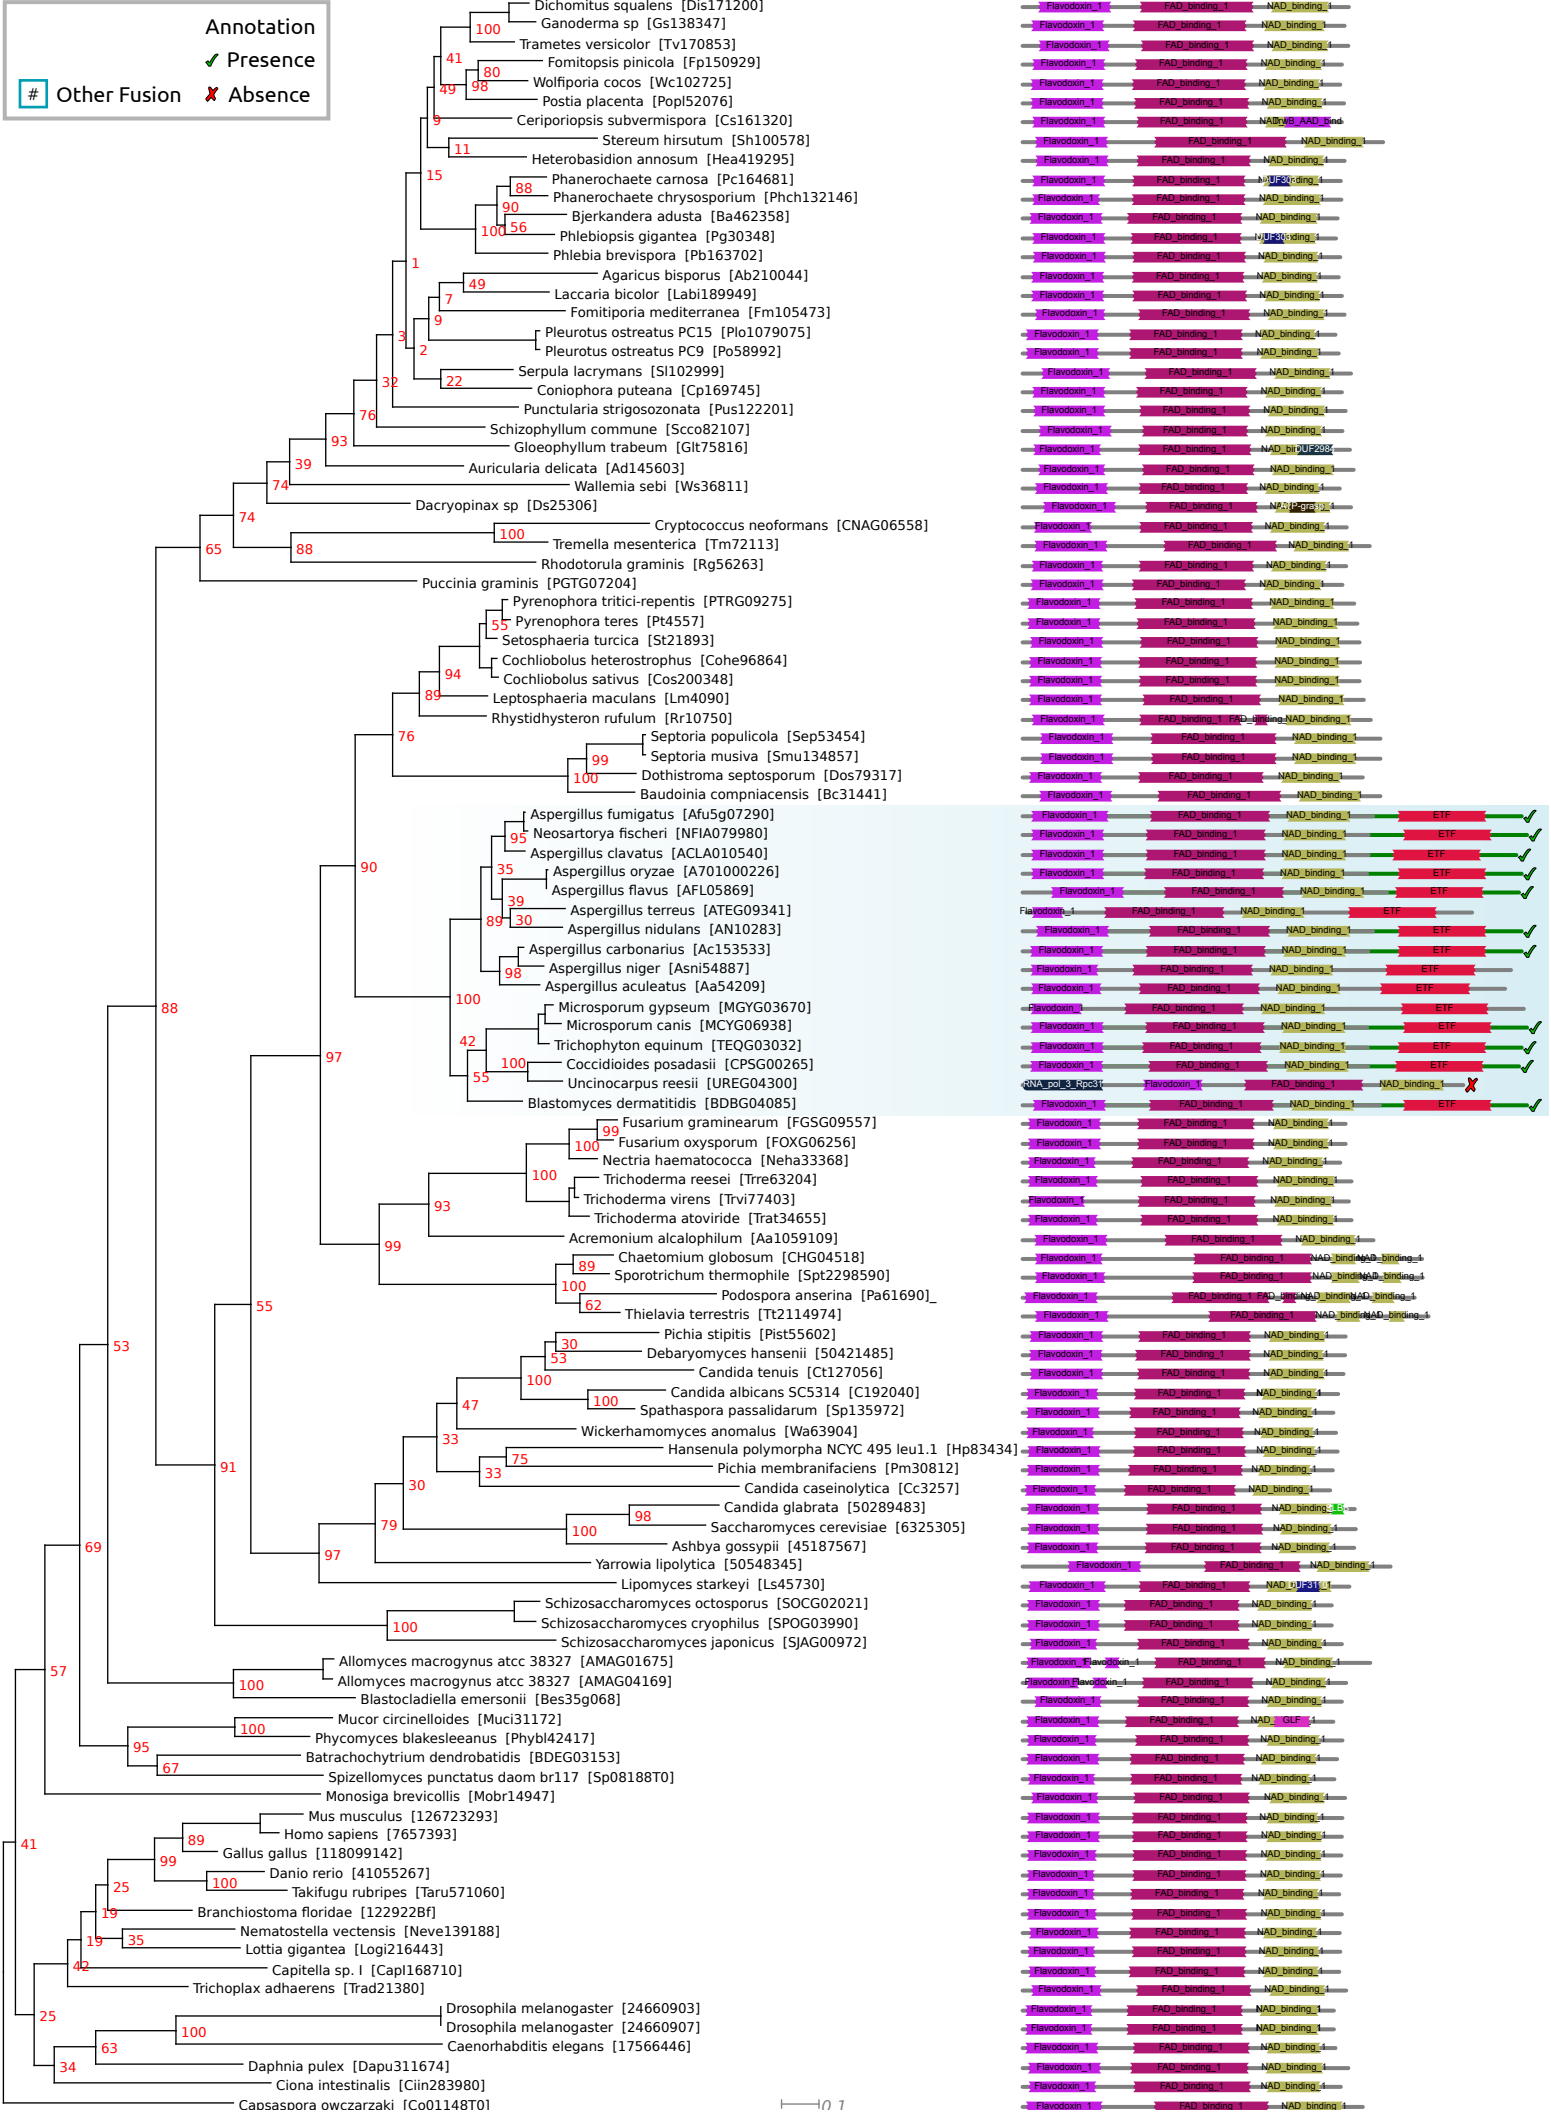

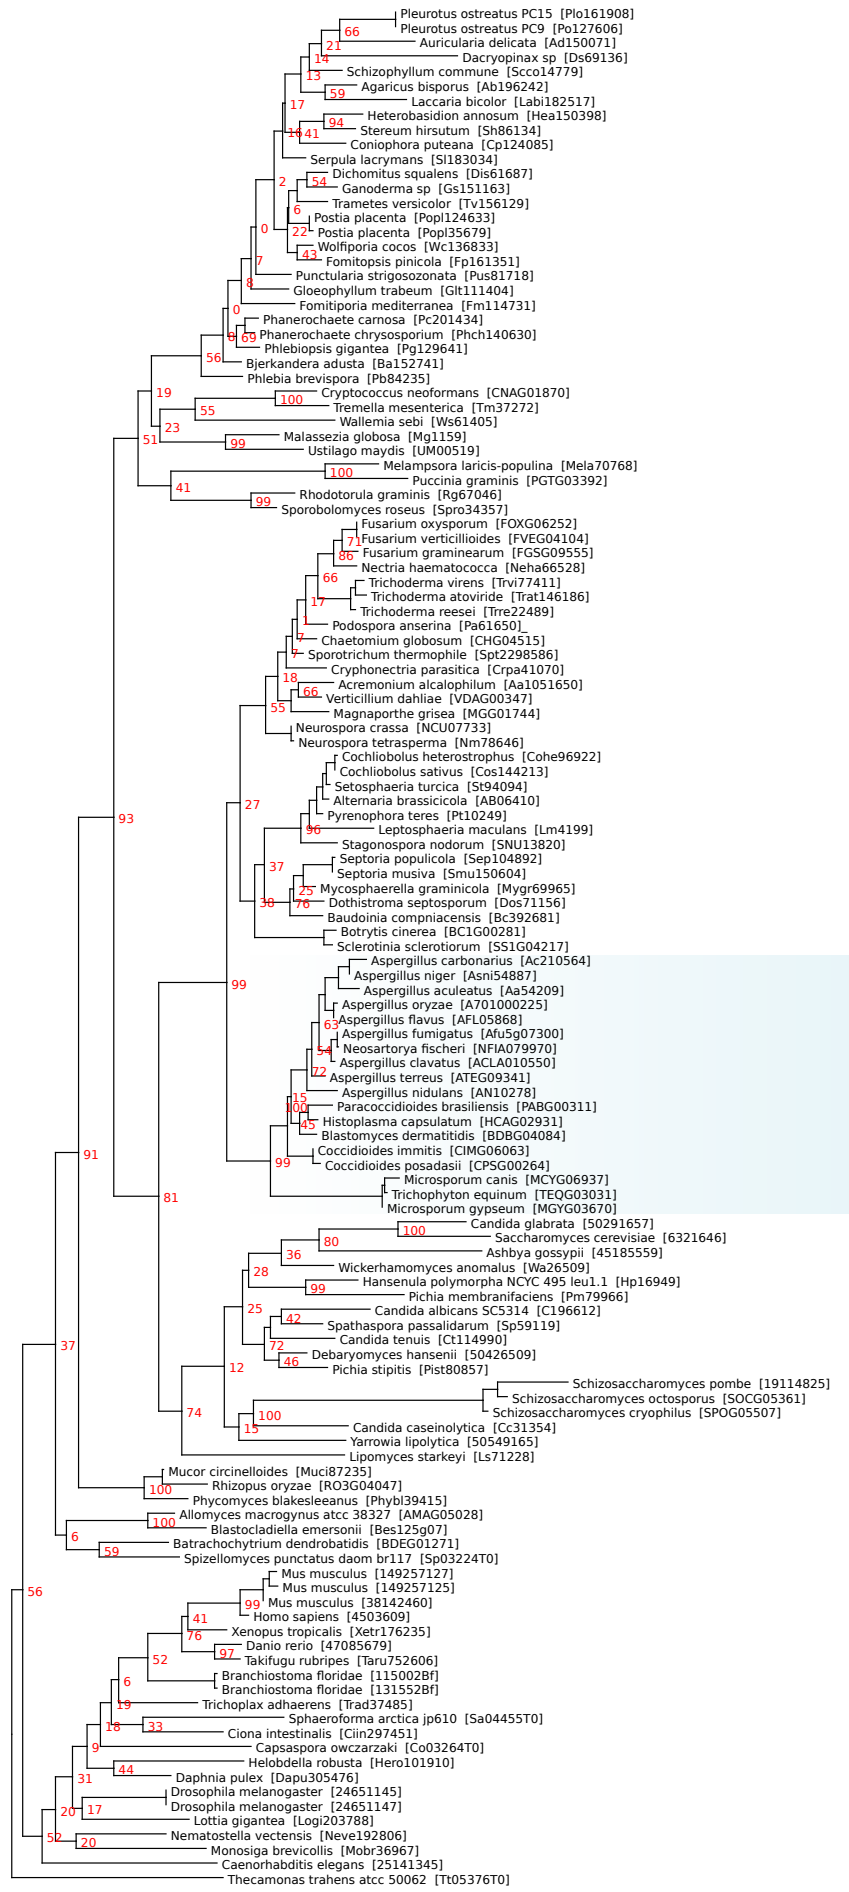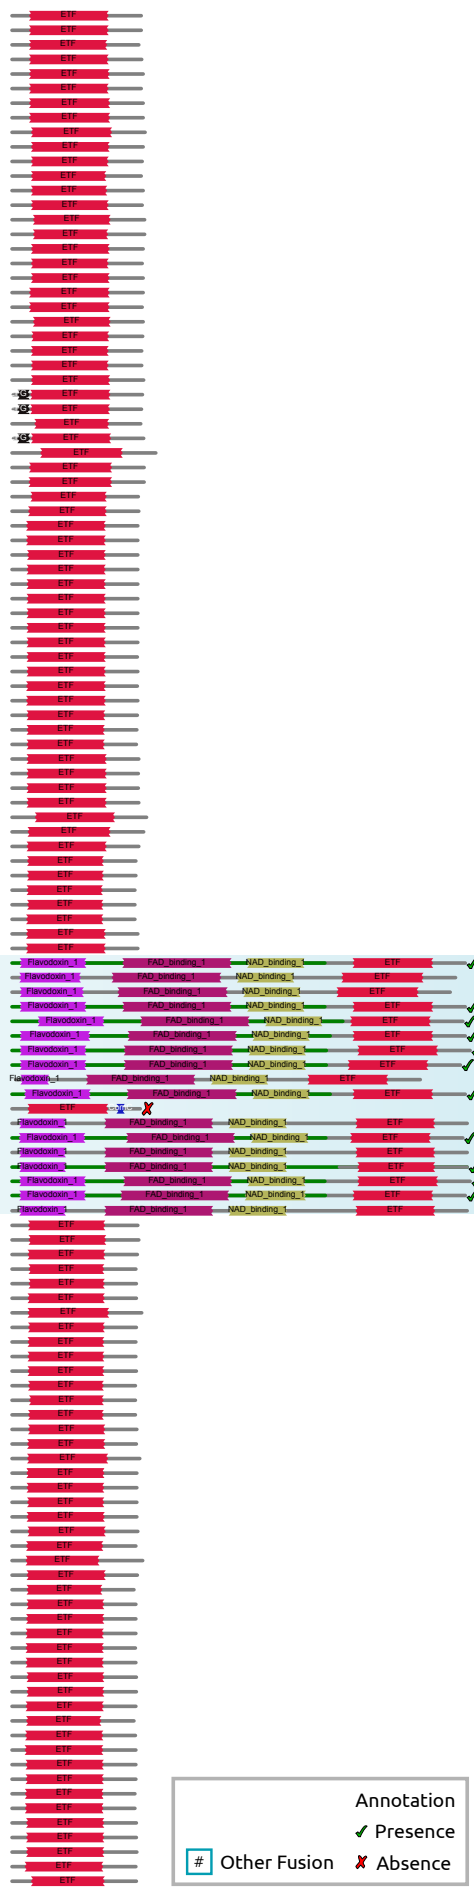

Annotation

✓ Presence

# Other Fusion ✗ Absence



# Putative Fusion 45

September 28, 2012

## 1 Fasta Sequences

These are the unfused sequences identified by fdfBLAST belonging to the putative gene fusion in FASTA format. Accessions may be shortened, but belong to either the taxons individual genome project or NCBI's accession numbering.

```
>EG0052791Sela_dom1
MASFEDYDEFGNYIGGDLASDDEDDILQPDRPPVQEQPATLEGYDDEPMGVQEDGALME
IDEPVHNAVVLHEDKQYYPSASDVYGADVETLVQEEDAQPLSEPIVAPIKVRKWTVEEKD
MPETRFDKGFLNMMSPFDMIRNVAVVGHLLHGKTALVDMLVFETHKLIWDADQPTRYTD
THILSRERRISIKSSPMSLVLTSTSGKSHLVHLIDTPGHVNFVDEVASAMRLVDGIILVV
DVVEGMMINTEHIIRHAMQEGIKMTLVVNKIDRLILELRIPADAYYKIKHTIEEINTFI
SGIDPDPDLRLTPENGNVAFASDTMNWCFTRLSFAQMYADTYGSLDVQSFADRLWGDIF
NEETRKFTRKQADPEQSRFTVFHFIMDPLYKLYSHVLSQETDDLKQTLEGLGIRLKPVMYK
MDVRPLLKAALDQFFGPSTGLVDMIAEHIPSPVEGASGKVERTYTGQTSDLVATMKACD
AEGPVMVQITKLYHTTDAQSFRSFRVISGTIRKGMIDIKVLGEGYSPEDEEDMMKARVED
IWLSESRYPVPAEEAPAGNLVLLGGVDASISKATLASVDIDDDLHIFRPIKHMTESVLK
>EG0052791Sela_dom2
VAIEPIAPSELPKMLSGLRISINKSYPLAATKVEESGEHVLI GTGELYLDCILHDLRKLFS
EIEIKVSDPVTKFCETVLETSALKCYADTPNKKNKITMIAEPLERGVAEDVERGRVTMRM
TPKERGSFFQEKYQWDLASRSIWAFFGPEESGPNILLDDTLPSQVDKMLGTVKEHIKQG
FQWGAREGPLCDEPMRNVKFRILDASLAQEPFRGGGQIVPTARRVCYSSFLMATPRLME
PVYYYVEVQAPADCISAVYTVLARRRGHVTDIPKAGSPLYTVKALIPVIDANGFETDLRT
ATQGGAFCLQVFDHWSIVPGDPTDTSIKLRPLEPASGQALARDLVKTRRRKGLGDQIAV
SKYLDDEFVVTLSVLLAVAAAASASASDDAKPVFQATEITAPFLEQFTDDWSERWTPSEAT
KKTVPVGGETFSYVGKWEVEEPETVVVEGDKGLVAKTKAAHHAISAPFSEPI SFKDKPLVV
QYEVKYQKGGNCGGGYVKLLEDGFQTSKGKFSNTPWVVMFGPDLTCPGTKLHFIFRHK
PITGEYEEKHLVPPPKPAFEKLTNLTYLIVNPDNTYDVLVFNESQKSGSLEDFTPAVNP
SKEIDDPEDTKPEDWVDTKRIADPDATKPADWDEDEPYQIVDEDAEKPEGWLDDEPDTIP
DPDAEKPEEWDDEEDGDWIAPTVSNPACEEAPGCGAWKAPMKANPAYKWKWYAPMIDNPA
YIGEWAPRKIANPDDFFEDLTPVQSLEKIGGIGIELWTMTEDILFNNIYIGHSAEDAKALA
AETFVVKRPLEVEAAKVTLPPDDDEEVSFAEDPVAFIRQKVFTFIDLAKLDPVLAFKTQPE
TGVALAGAVFTFLFGMIGVLFGLVGAQKQPITKSSKKTDAPTADDDKKKDESAPVAPAGGEK
KDETPVKKRK
```

## 2 Annotated Phylograms

All trees were generated from an initial run of Darren's Orchard pipeline against 139 taxa (Table S1), using the above corresponding un-fused sequences as BLAST seeds. The alignments were then checked for any missing taxa, manually masked and then ProtTest3 was run, please see the Methods section for detail. The final trees were generated by the following command:

```
phymtl -i alignment_file -d aa -b 100 -m model -c 8 -v invariant_sites -s BEST --quiet -a gamma
```

Styling and annotation was made possible by Dendroscope and Inkscape.

## 3 Mesquite Cladogram

This tree is the 68-gene concatenated phylogeny (Fig. 1), with the presence of a fusion (black), presence of a fission (white), and absent/undetermined (grey) status of gene fusion characters plotted on to it using a "1/0/-" nexus-style data matrix. We used the program 'Mesquite' to calculate proportional likelihoods based on either an "Mk1" or "Assym. 2 param model." (see Table S4) of character change across the fungal phylogeny (Fig. 1). This allowed for a proportional likelihood of the position of the fusion/fission to be calculated.

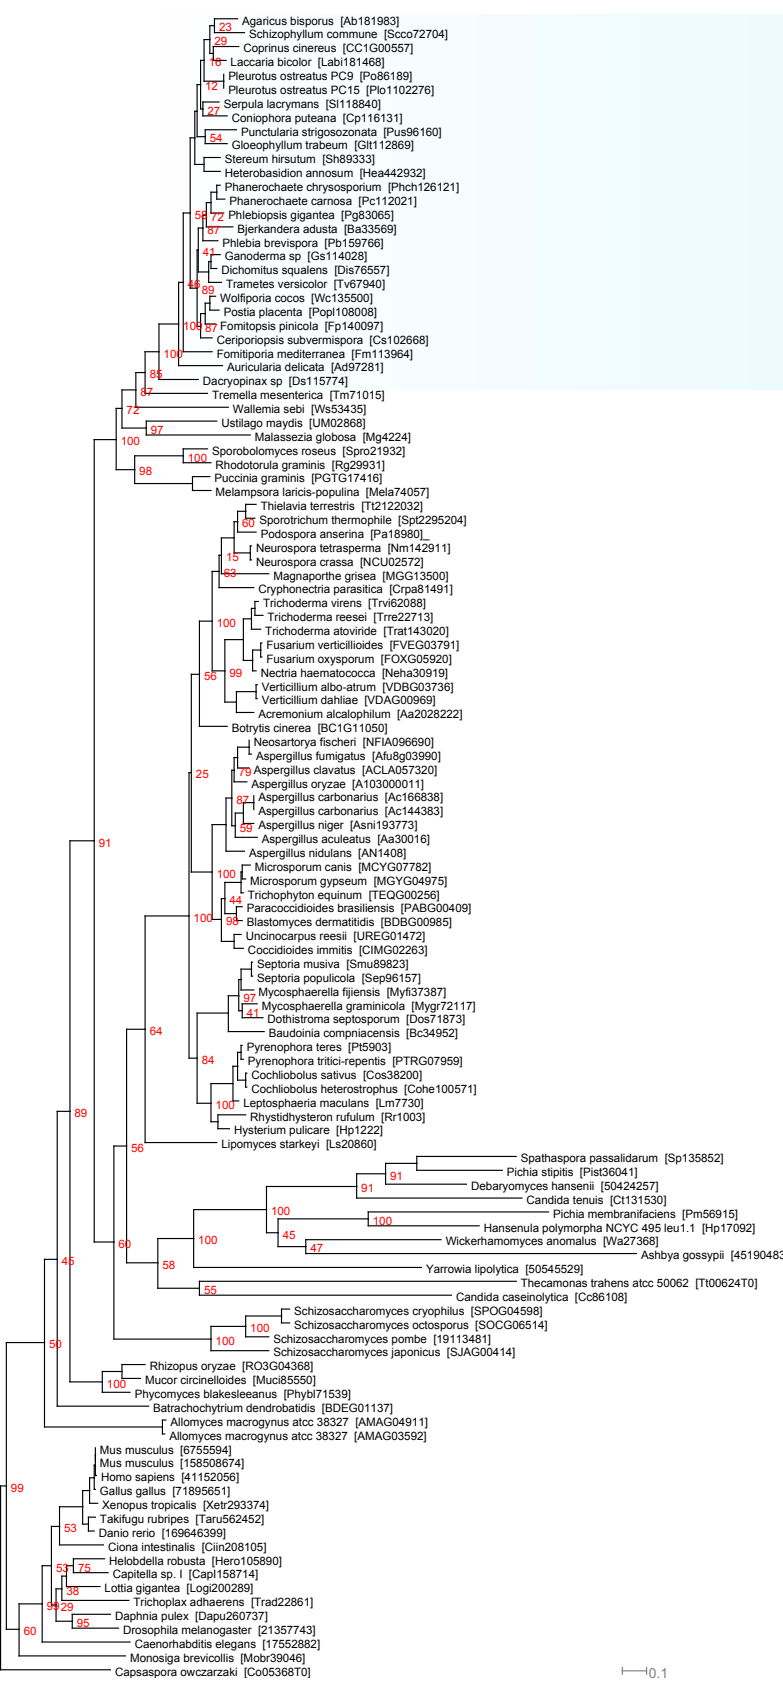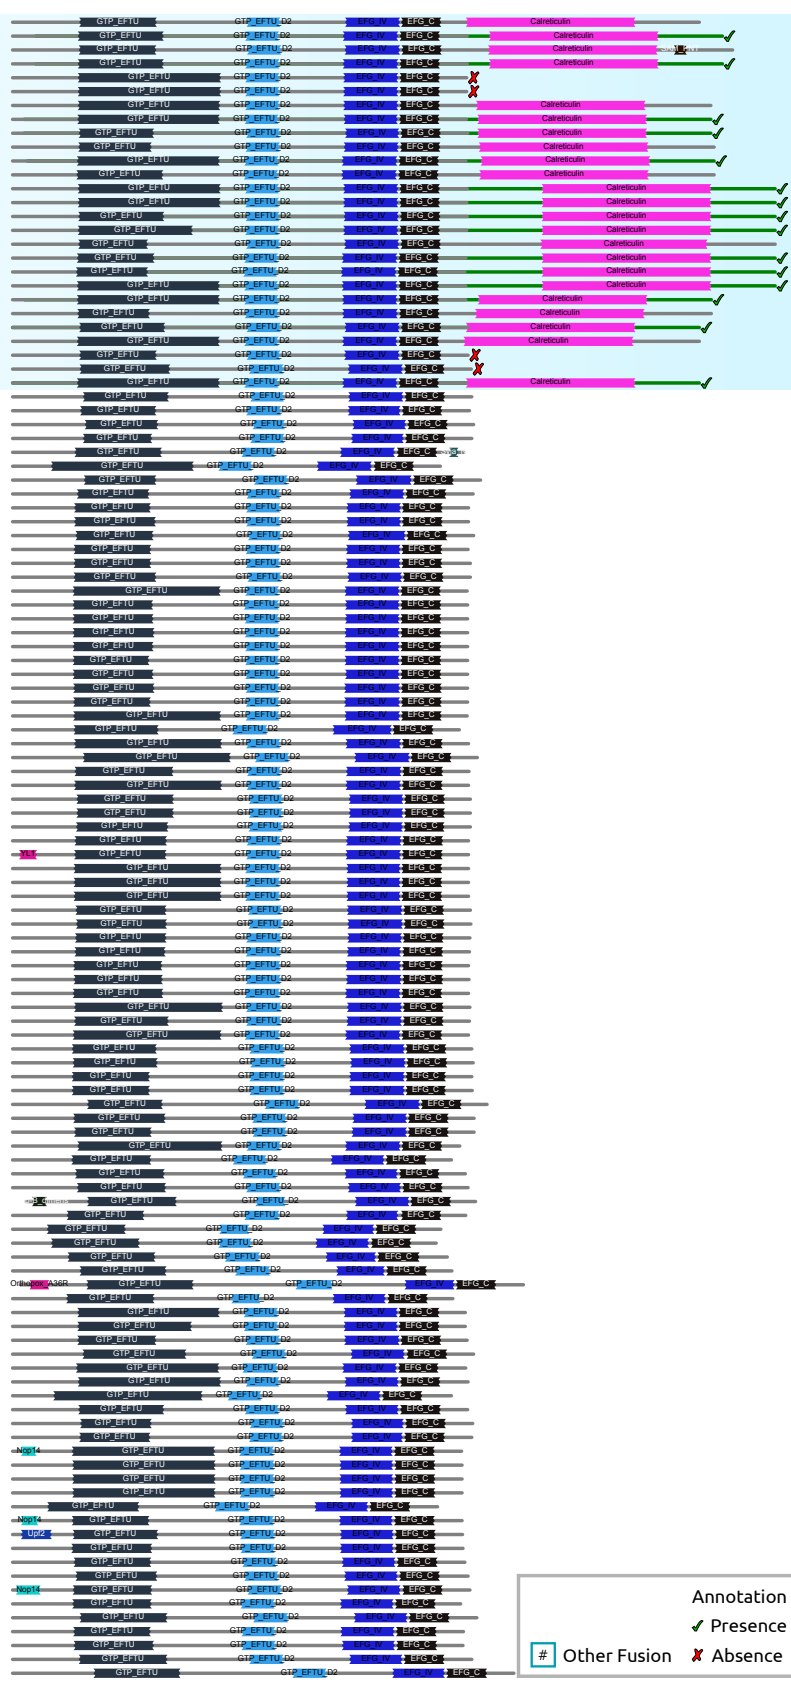

10.1

Annotation  
 ✓ Presence  
 # Other Fusion ✗ Absence

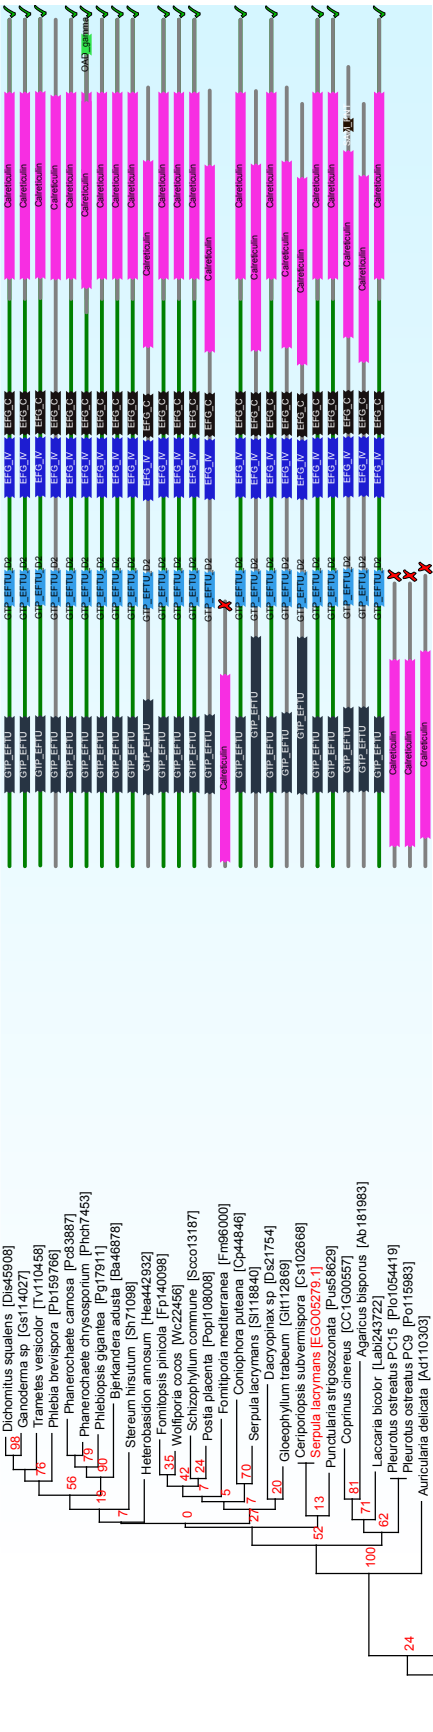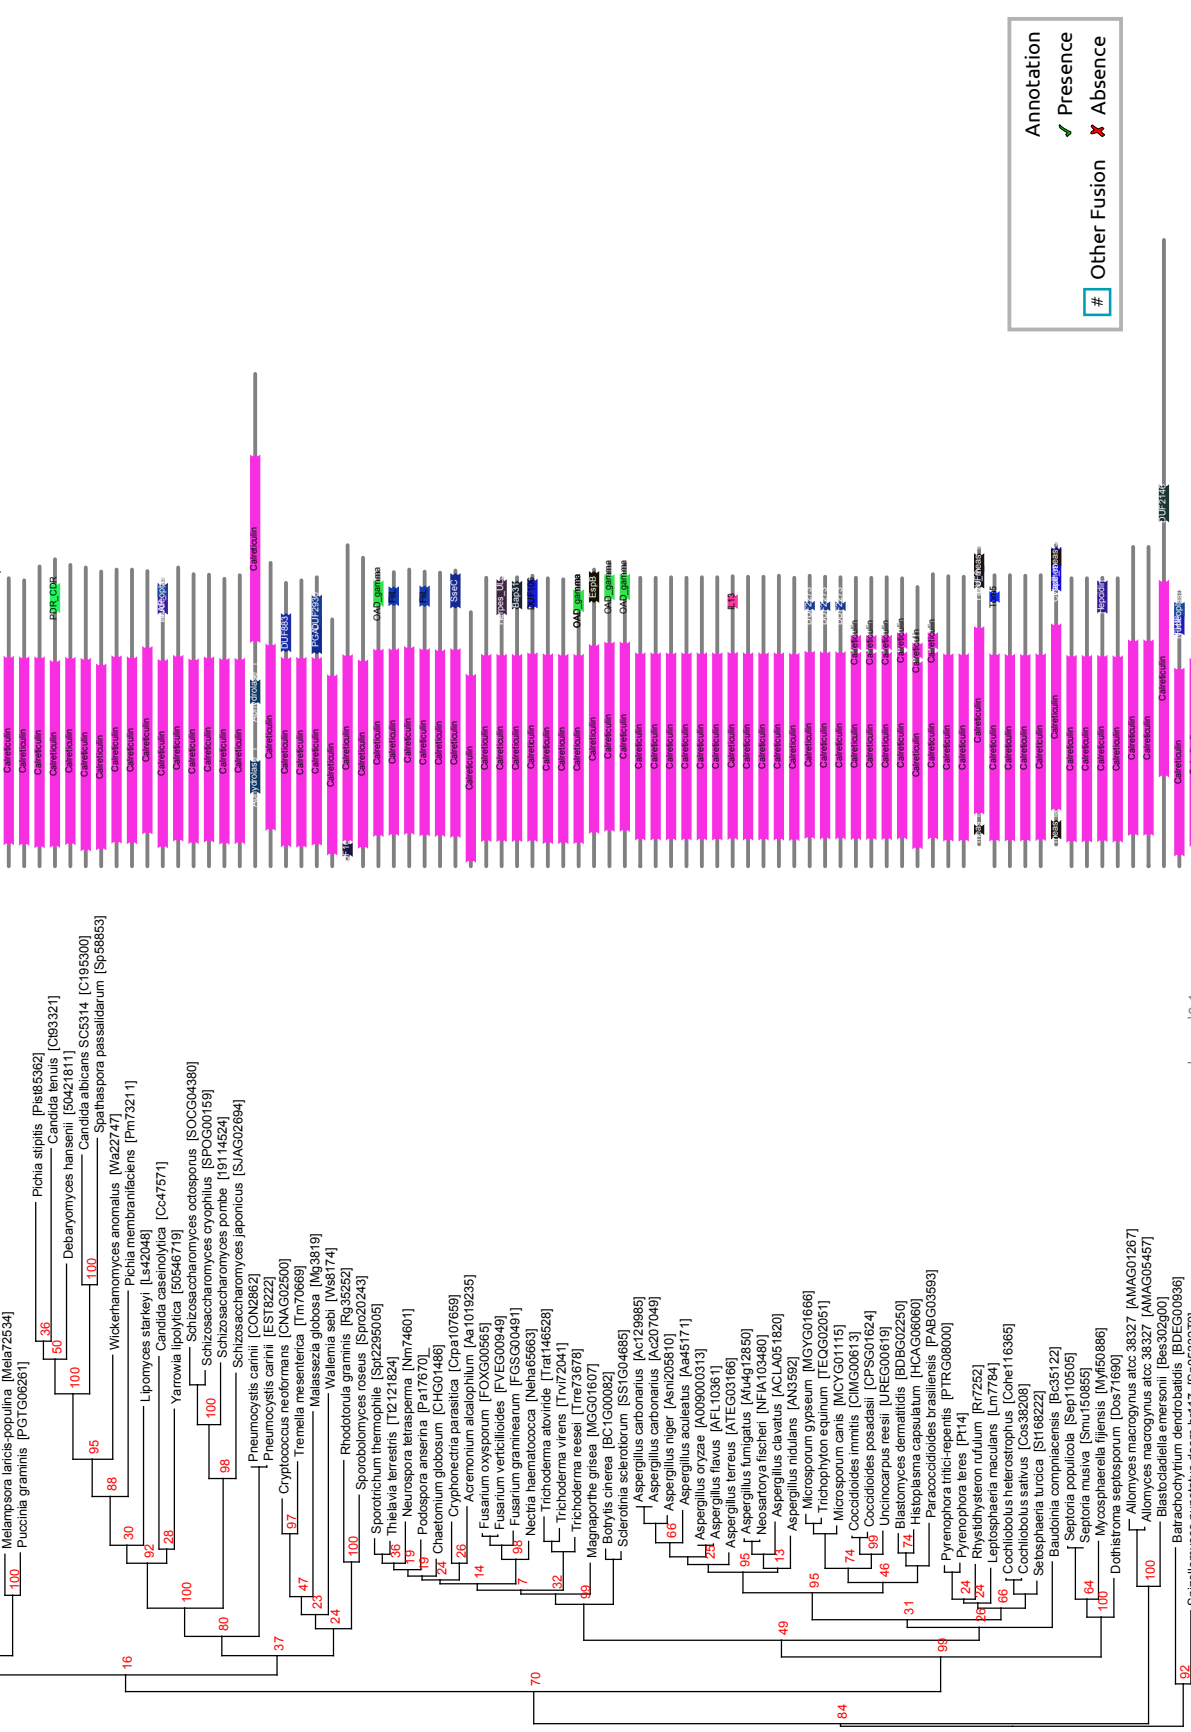

Annotation

✓ Presence

✗ Absence

# Other Fusion







# Putative Fusion 46

September 27, 2012

## 1 Fasta Sequences

These are the unfused sequences identified by fdfBLAST belonging to the putative gene fusion in FASTA format. Accessions may be shortened, but belong to either the taxons individual genome project or NCBI's accession numbering.

```
>EFY904791Meac_dom1
MEGDEAYGTGGLMDDPEDYPPSPPTKQIFGMQNGKQVTLHLVGHSPTEAHHLWNGAMF
ISDYFEQDPSRVEGKSVLELGAGAGLPSLVAGILGAKKVVMTDFPDPDLVANMQKNIDEC
NATVEPEGHIERTIDAAGFVWGADPEPLLARLAPGYQKGDGDMQQRFDVLLADLLFR
HSEHGALVKTIKETMRASRDSAAYVFFTSYRPWKQDLDMGFFDVARNAGLEVEQVSRKLE
EKPLFEGDPGDLVDVQKTVKGFIVRWRVEDSLYIVLHQSKFAAKPPERMPPTIAQGPLVA
>EFY904791Meac_dom2
VCCGGNSENyGVQRILESDLSGHMPAQKSTGHLELDERDGFVVVRGIVTGQKLEELREAS
LKVEKLGSRGQWPHIRTVGKQFPPWTFSTEKGIWGVQHLMPDLPGHEIFTRQYFSEEIL
SIVRELLQCDDNELVMELFNMLVLPDEHFELRWRDDIPAEASAEEMERLGRPAFHAQY
NFALWEDESLVLPVSHKRPRTETERNADPFKVLPEQLVVKLGPGDIAFYNNILHRGV
YDSKKDRVTLHGVSVGHSGSKLRARNVLQHGIGGYVDKVDVSKLSDGERQRAEEMRARLV
KLGSESGDVGYSLQG
```

## 2 Annotated Phylograms

All trees were generated from an initial run of Darren's Orchard pipeline against 139 taxa (Table S1), using the above corresponding un-fused sequences as BLAST seeds. The alignments were then checked for any missing taxa, manually masked and then ProtTest3 was run, please see the Methods section for detail. The final trees were generated by the following command:

```
phym1 -i alignment_file -d aa -b 100 -m model -c 8 -v invariant_sites -s BEST --quiet -a gamma
```

Styling and annotation was made possible by Dendroscope and Inkscape.

## 3 Mesquite Cladogram

This tree is the 68-gene concatenated phylogeny (Fig. 1), with the presence of a fusion (black), presence of a fission (white), and absent/undetermined (grey) status of gene fusion characters plotted on to it using a "1/0/-" nexus-style data matrix. We used the program 'Mesquite' to calculate proportional likelihoods based on either an "Mk1" or "Assym. 2 param model." (see Table S4) of character change across the fungal phylogeny (Fig. 1). This allowed for a proportional likelihood of the position of the fusion/fission to be calculated.

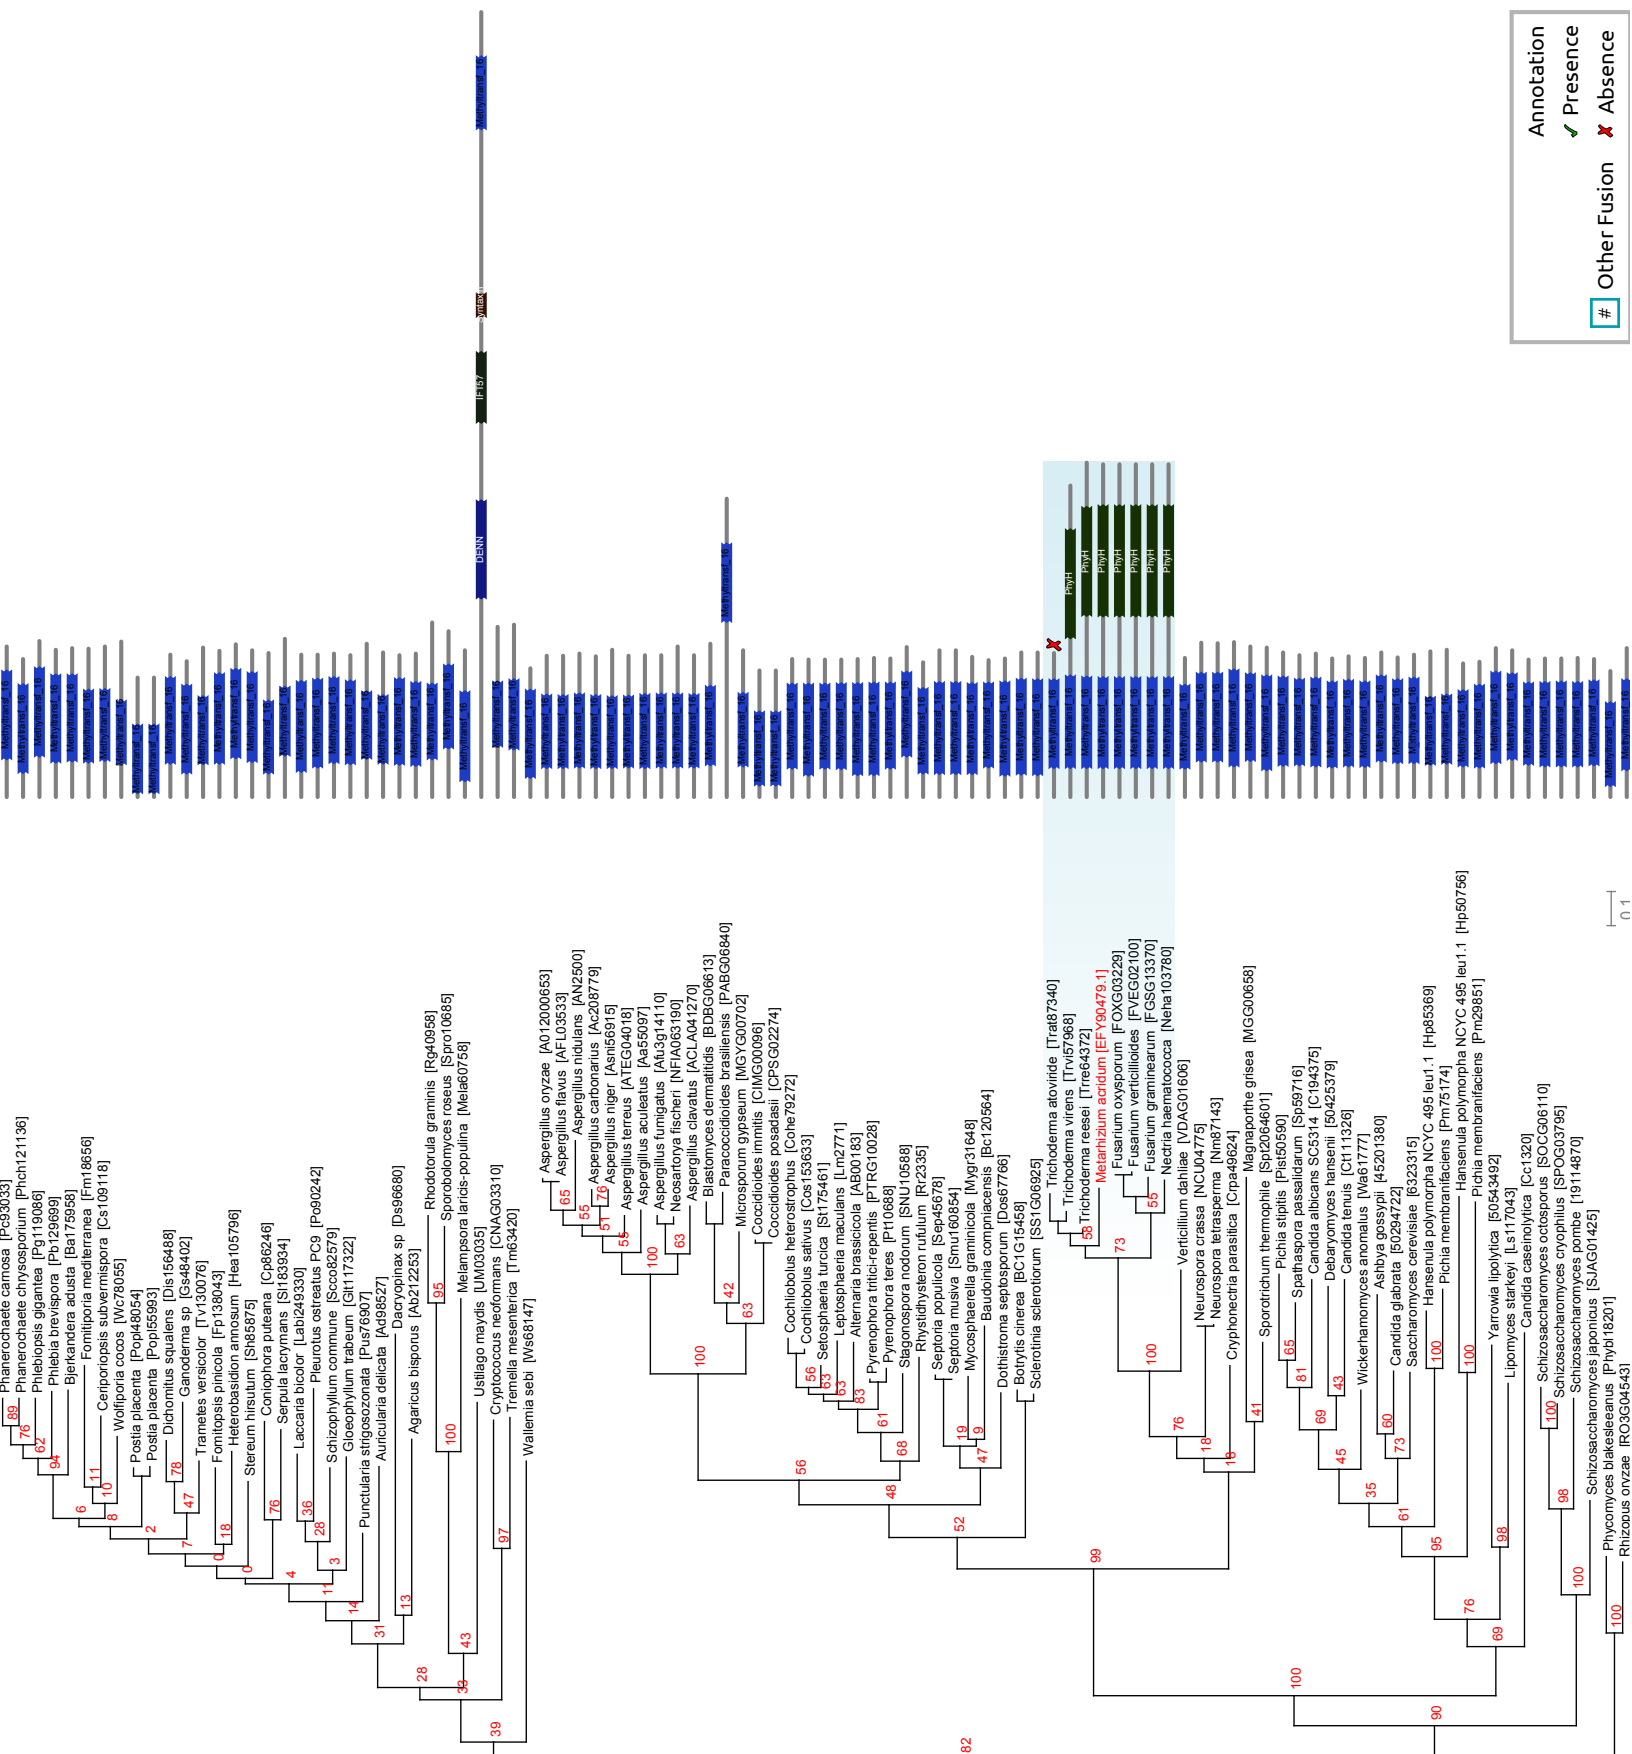

Annotation

✓ Presence

# Other Fusion ✗ Absence

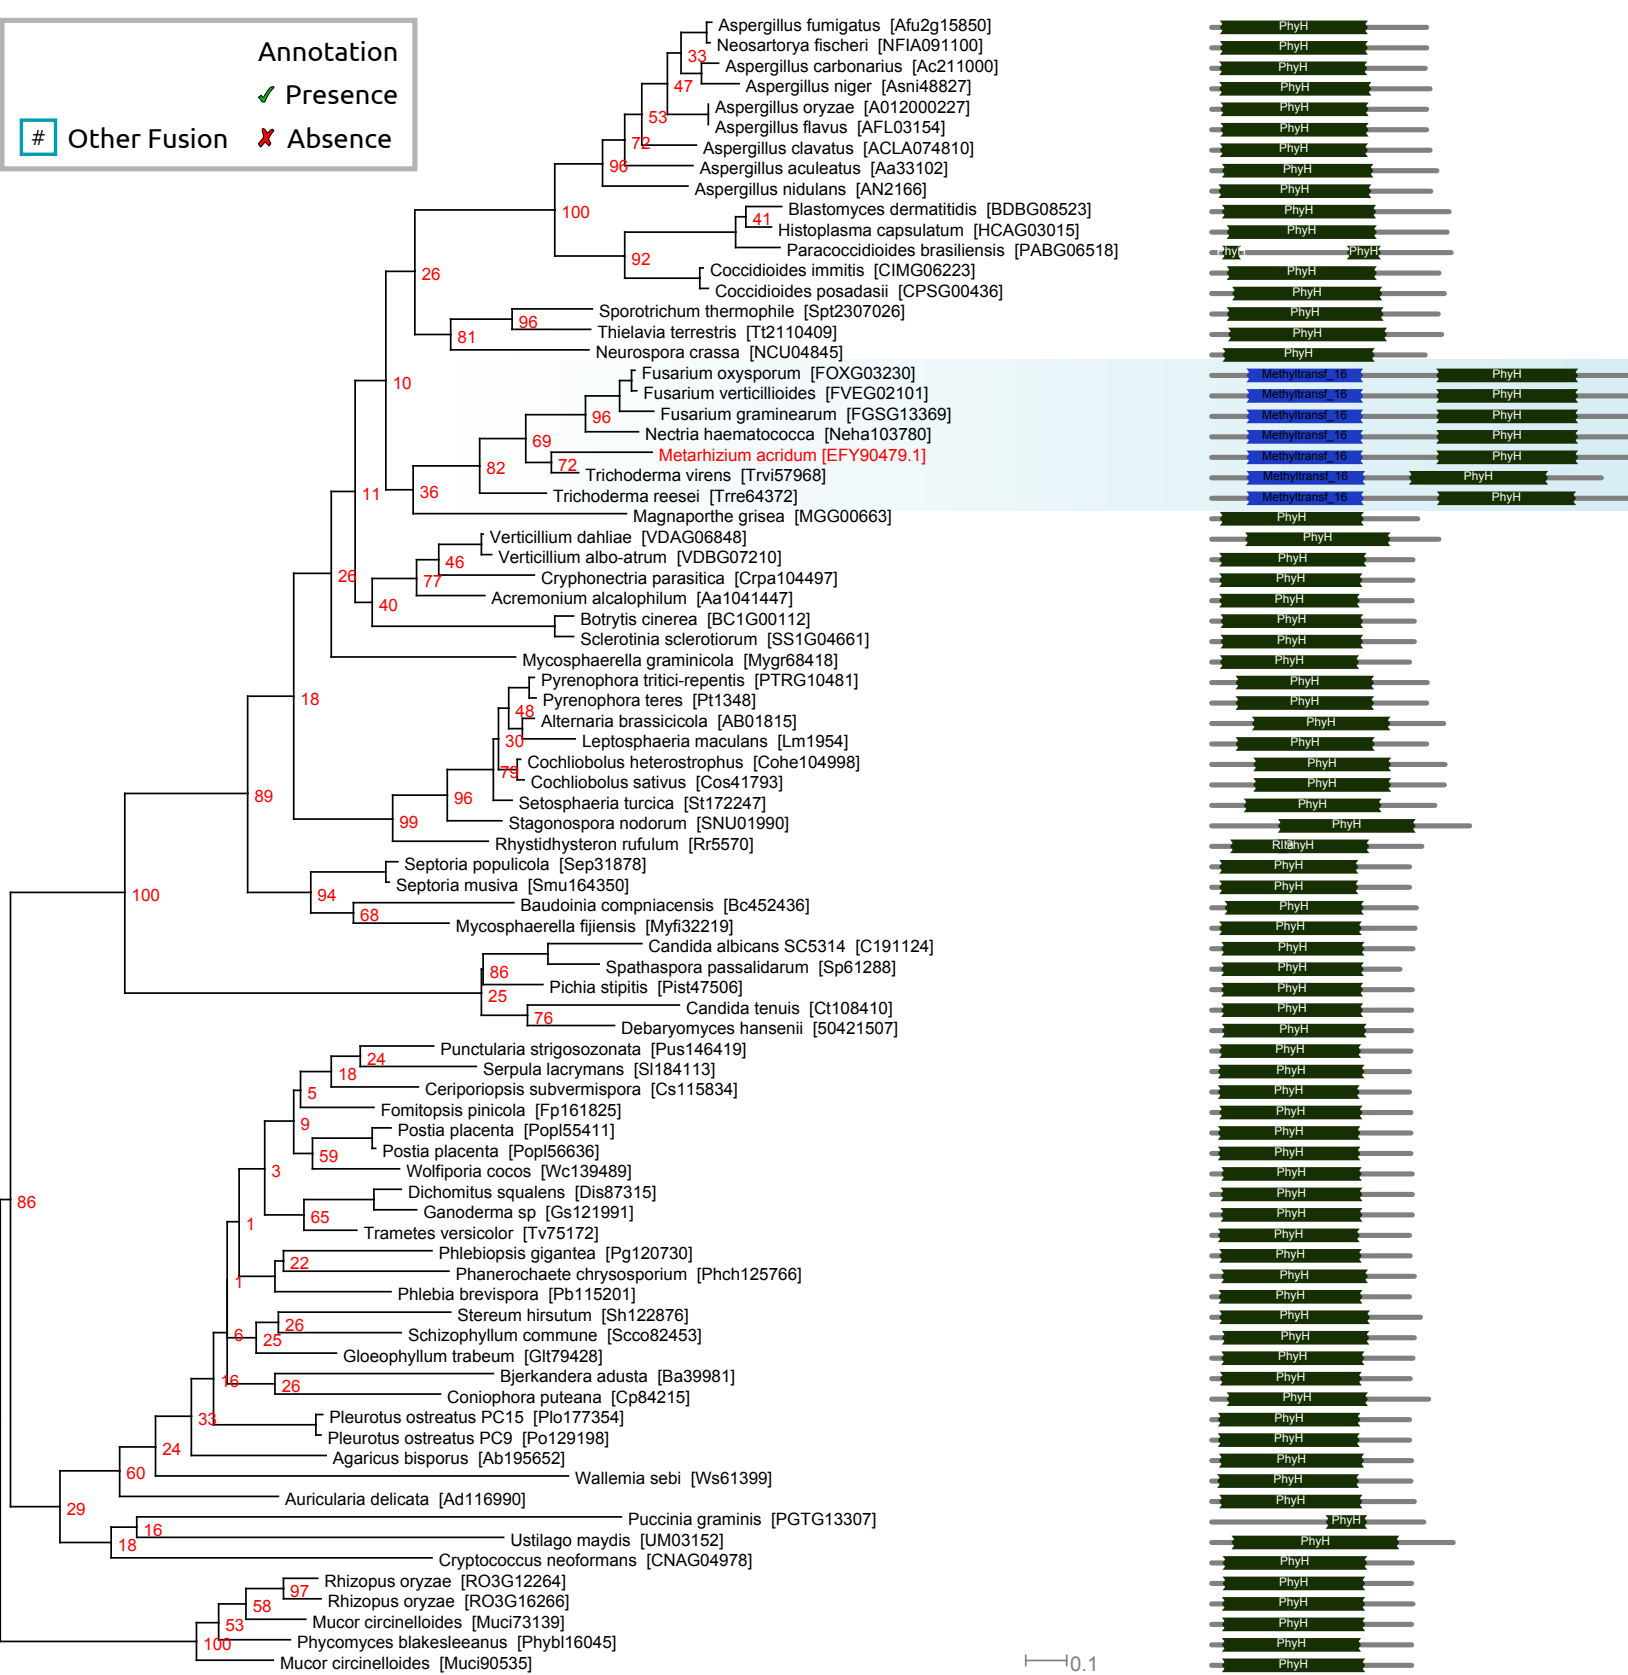

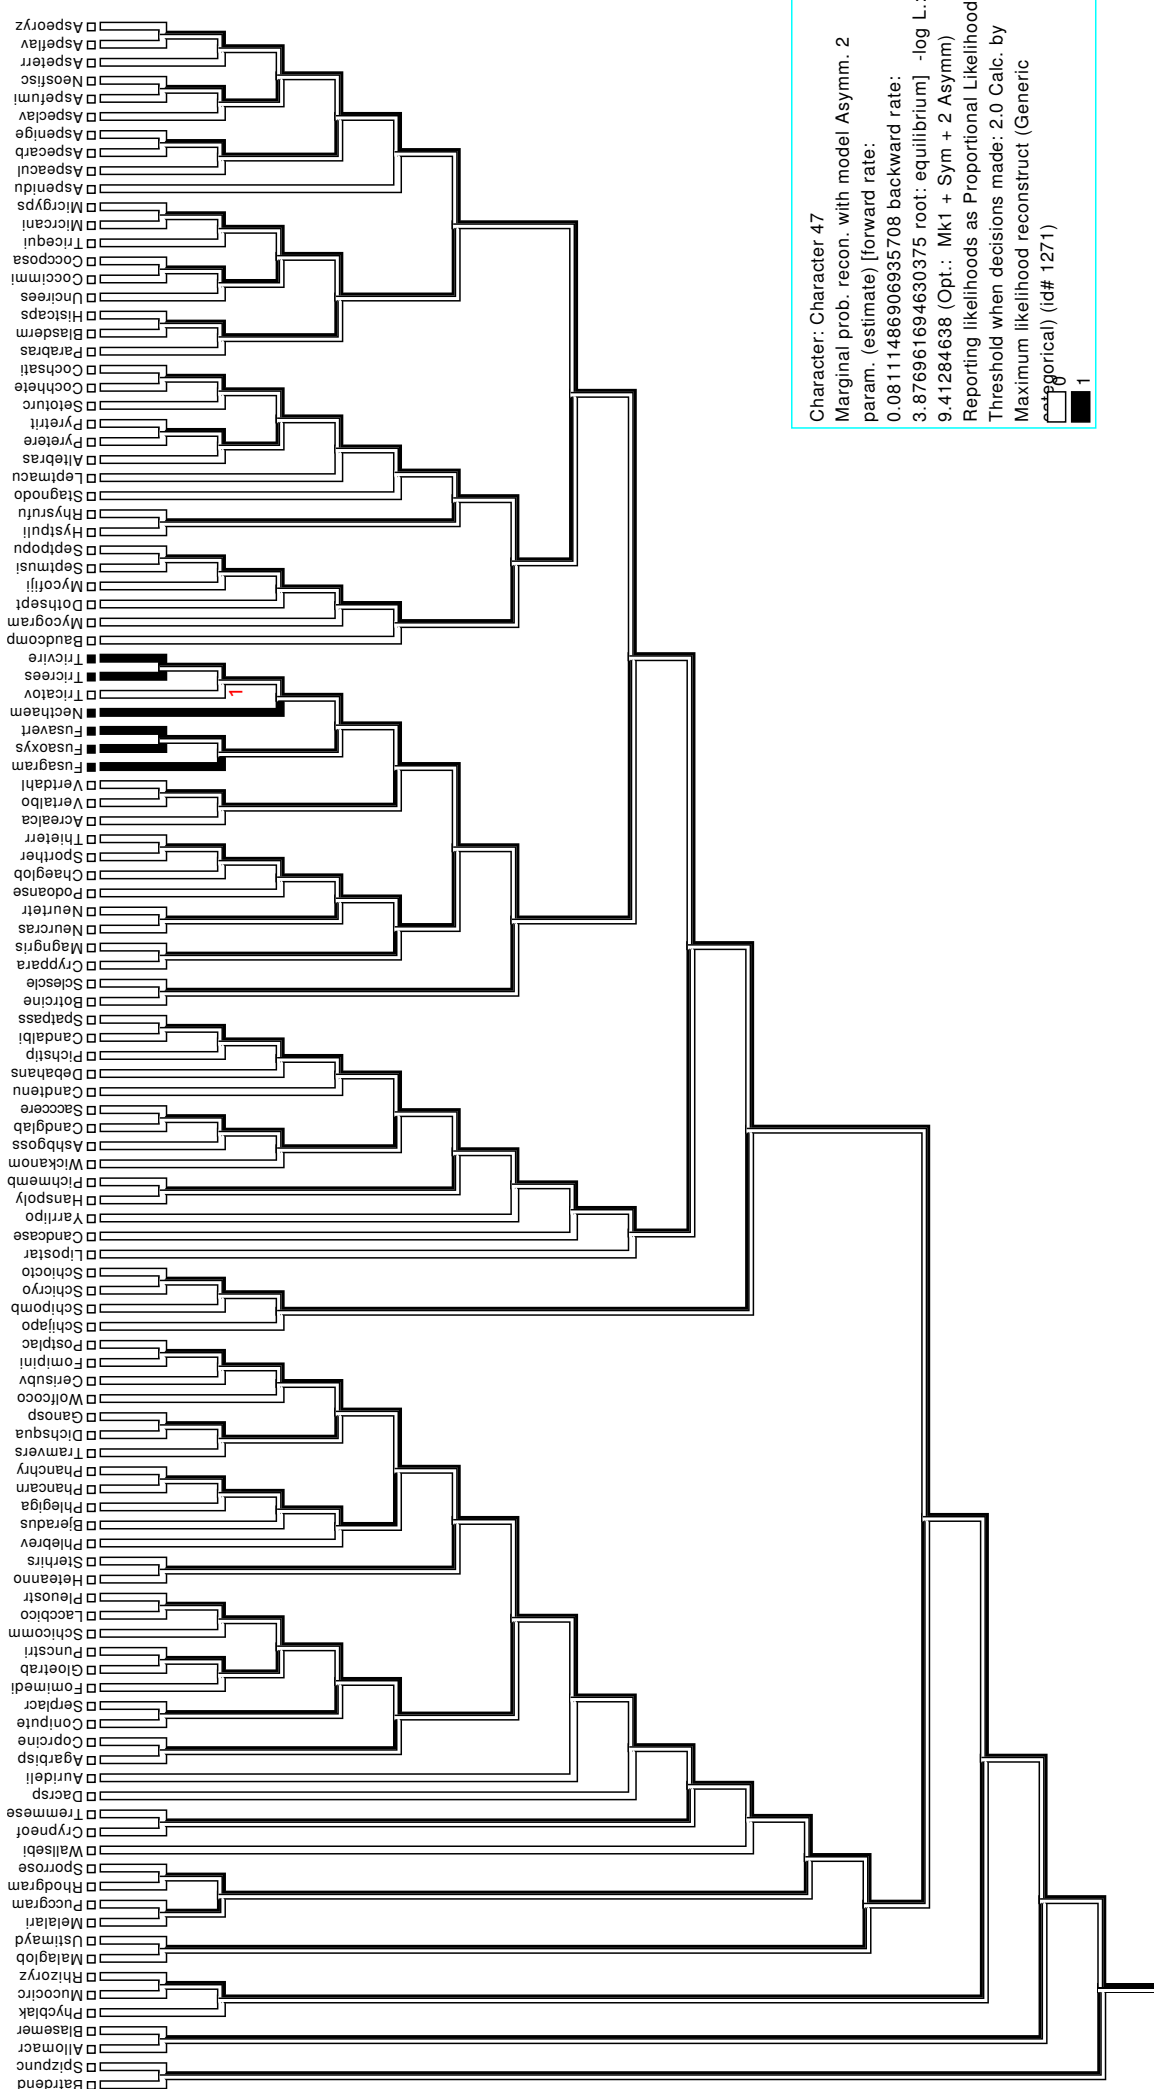

Character: Character 47  
 Marginal prob. recon. with model Asymm. 2  
 param. (estimate) [forward rate:  
 0.0811486906935708 backward rate:  
 3.876961694630375 root: equilibrium] -log L.:  
 9.41284638 (Opt.: Mk1 + Sym + 2 Asymm)  
 Reporting likelihoods as Proportional Likelihoods;  
 Threshold when decisions made: 2.0 Calc. by  
 Maximum likelihood reconstruct (Generic  
 categorical) (id# 1271)

# Putative Fusion 47

September 27, 2012

## 1 Fasta Sequences

These are the unfused sequences identified by fdfBLAST belonging to the putative gene fusion in FASTA format. Accessions may be shortened, but belong to either the taxons individual genome project or NCBI's accession numbering.

```
>CBY021751Lema_dom1
MRQVYGGPKLPVELRNQFDPSYGSRSKSGRNGPATRKDKRKADRVKKKRQNKQVRRPAPVR
PENGRGPAKRHGQGEDDEDEDEAIDWNVNTEDEGTTPPPAPAKESLKKPKSILRKSSSQE
EDSEKPPSVPRAIKEKLNQDDAEIAALEKRLGVKGGKSKGVEHDGLDDIFGDLGDFGSE
DEGLGQQPLKRRNEDDNWLASKRQKALGAAPKDDTDDDKDSEAEESLDGEDYSDLDDLG
GSDMEGFDSEEEDEENGESEDEEPIQSRVRENYPVAPIAPGASPAKYVPPALRAPPSSDA
ETLSRLRRQIQGLFNRLSEANILTKDIEGIYQNNPRGYVNTTLLIDLLTGMLS DPSALL
DTFLNLHAGFIAAIYKVIQPDFGAQMIERIVSEFDTHYQHNKEGTGQQTKNLISVVAELY
TFQVIGSNIVFDYIRFFLDELTEINTELLLRVVRAAGPQLRQDDPTALKDIVVLLQKSLA
KVGQANLPVRTKFMETINDLKNNKMTGIAASHMSREHTTRMKKQLGTLNSRNLKATEP
LRVGLKDIKDTDKKGGWLVGASWRNEPGTEDPIQETKTIPRHTQTLENEDDDSEIDL VQ
LAREQQMNTDIRRAIYISIMSASDFKDAQIRLSKLNLRKRSQEVEIPRVIVHCAGAEETY N
PYTTLARKVCS DHKSRKSFQFALWDFKSLGKQDGADSDDDQDDTKNETNLRKIVSQ
GKLYGTLIGRKALPITSLKNLNFYMQPKTKTFVEVILVTTILESLKGSKDKRNERAVRE
>CBY021751Lema_dom2
IFVEVDHAPEMIAGLQFFLKKTVRKT DIVEKADKETVRWACKS IMDIRIDQGGSRPSEFR
KKLNTSSRNEAPSIAACHLRHISHGFSWSPASLLSQFIMFRSLAPRALQRATRPVTQKSF
CASNLYFQNRLLRQGYASEAAEKDLVIIGGGVAGYVAAIKAGQAGLSVACIEKRGLGGTC
LNVGCIPSKSLLNNSHLYHQILHDTKGRGIEVGDVKNLNPAMMKAKDTSVAGLTKGIEFL
FKKNNVEYIKGTGAFQDEHTIAVNLVEGGETSVRGKNIL IATGSEATPFPGLTIDEQKVI
TSTGAINLQEVPAKMTVIGGGIIGLEMASVWSRLGSEVTVVEFLGQIGGPGMDNEIAKQS
QKILQKQGLKFKLNTKVTAGEVHDAGVKVSVEAAKGGKEETLDADVVLVAIGRRPYTAGL
GLDNISLETDERGRLIIDQEYRTKIPHIRSIGDCTFGPMLAHKAEEEEAVAAIEYITKGHG
HVNYGAIPSVMYTHPEVAWVGQNEQELKAAGIKYKTGNFPFSANSRAKTNLDTDGFKFL
SDAQTDRILGIHIIGANAGEMIAEGTLALEYGASSEDVARTCHAHPTLAEAFKEAAMATY
DKAVHY
```

## 2 Annotated Phylograms

All trees were generated from an initial run of Darren's Orchard pipeline against 139 taxa (Table S1), using the above corresponding un-fused sequences as BLAST seeds. The alignments were then checked for any missing taxa, manually masked and then ProtTest3 was run, please see the Methods section for detail. The final trees were generated by the following command:

```
phym1 -i alignment_file -d aa -b 100 -m model -c 8 -v invariant_sites -s BEST --quiet -a gamma
```

Styling and annotation was made possible by Dendroscope and Inkscape.

## 3 Mesquite Cladogram

This tree is the 68-gene concatenated phylogeny (Fig. 1), with the presence of a fusion (black), presence of a fission (white), and absent/undetermined (grey) status of gene fusion characters plotted on to it using a "1/0/-" nexus-style data matrix. We used the program 'Mesquite' to calculate proportional likelihoods based on either an "Mk1" or "Assym. 2 param model." (see Table S4) of character change across the fungal phylogeny (Fig. 1). This allowed for a proportional likelihood of the position of the fusion/fission to be calculated.

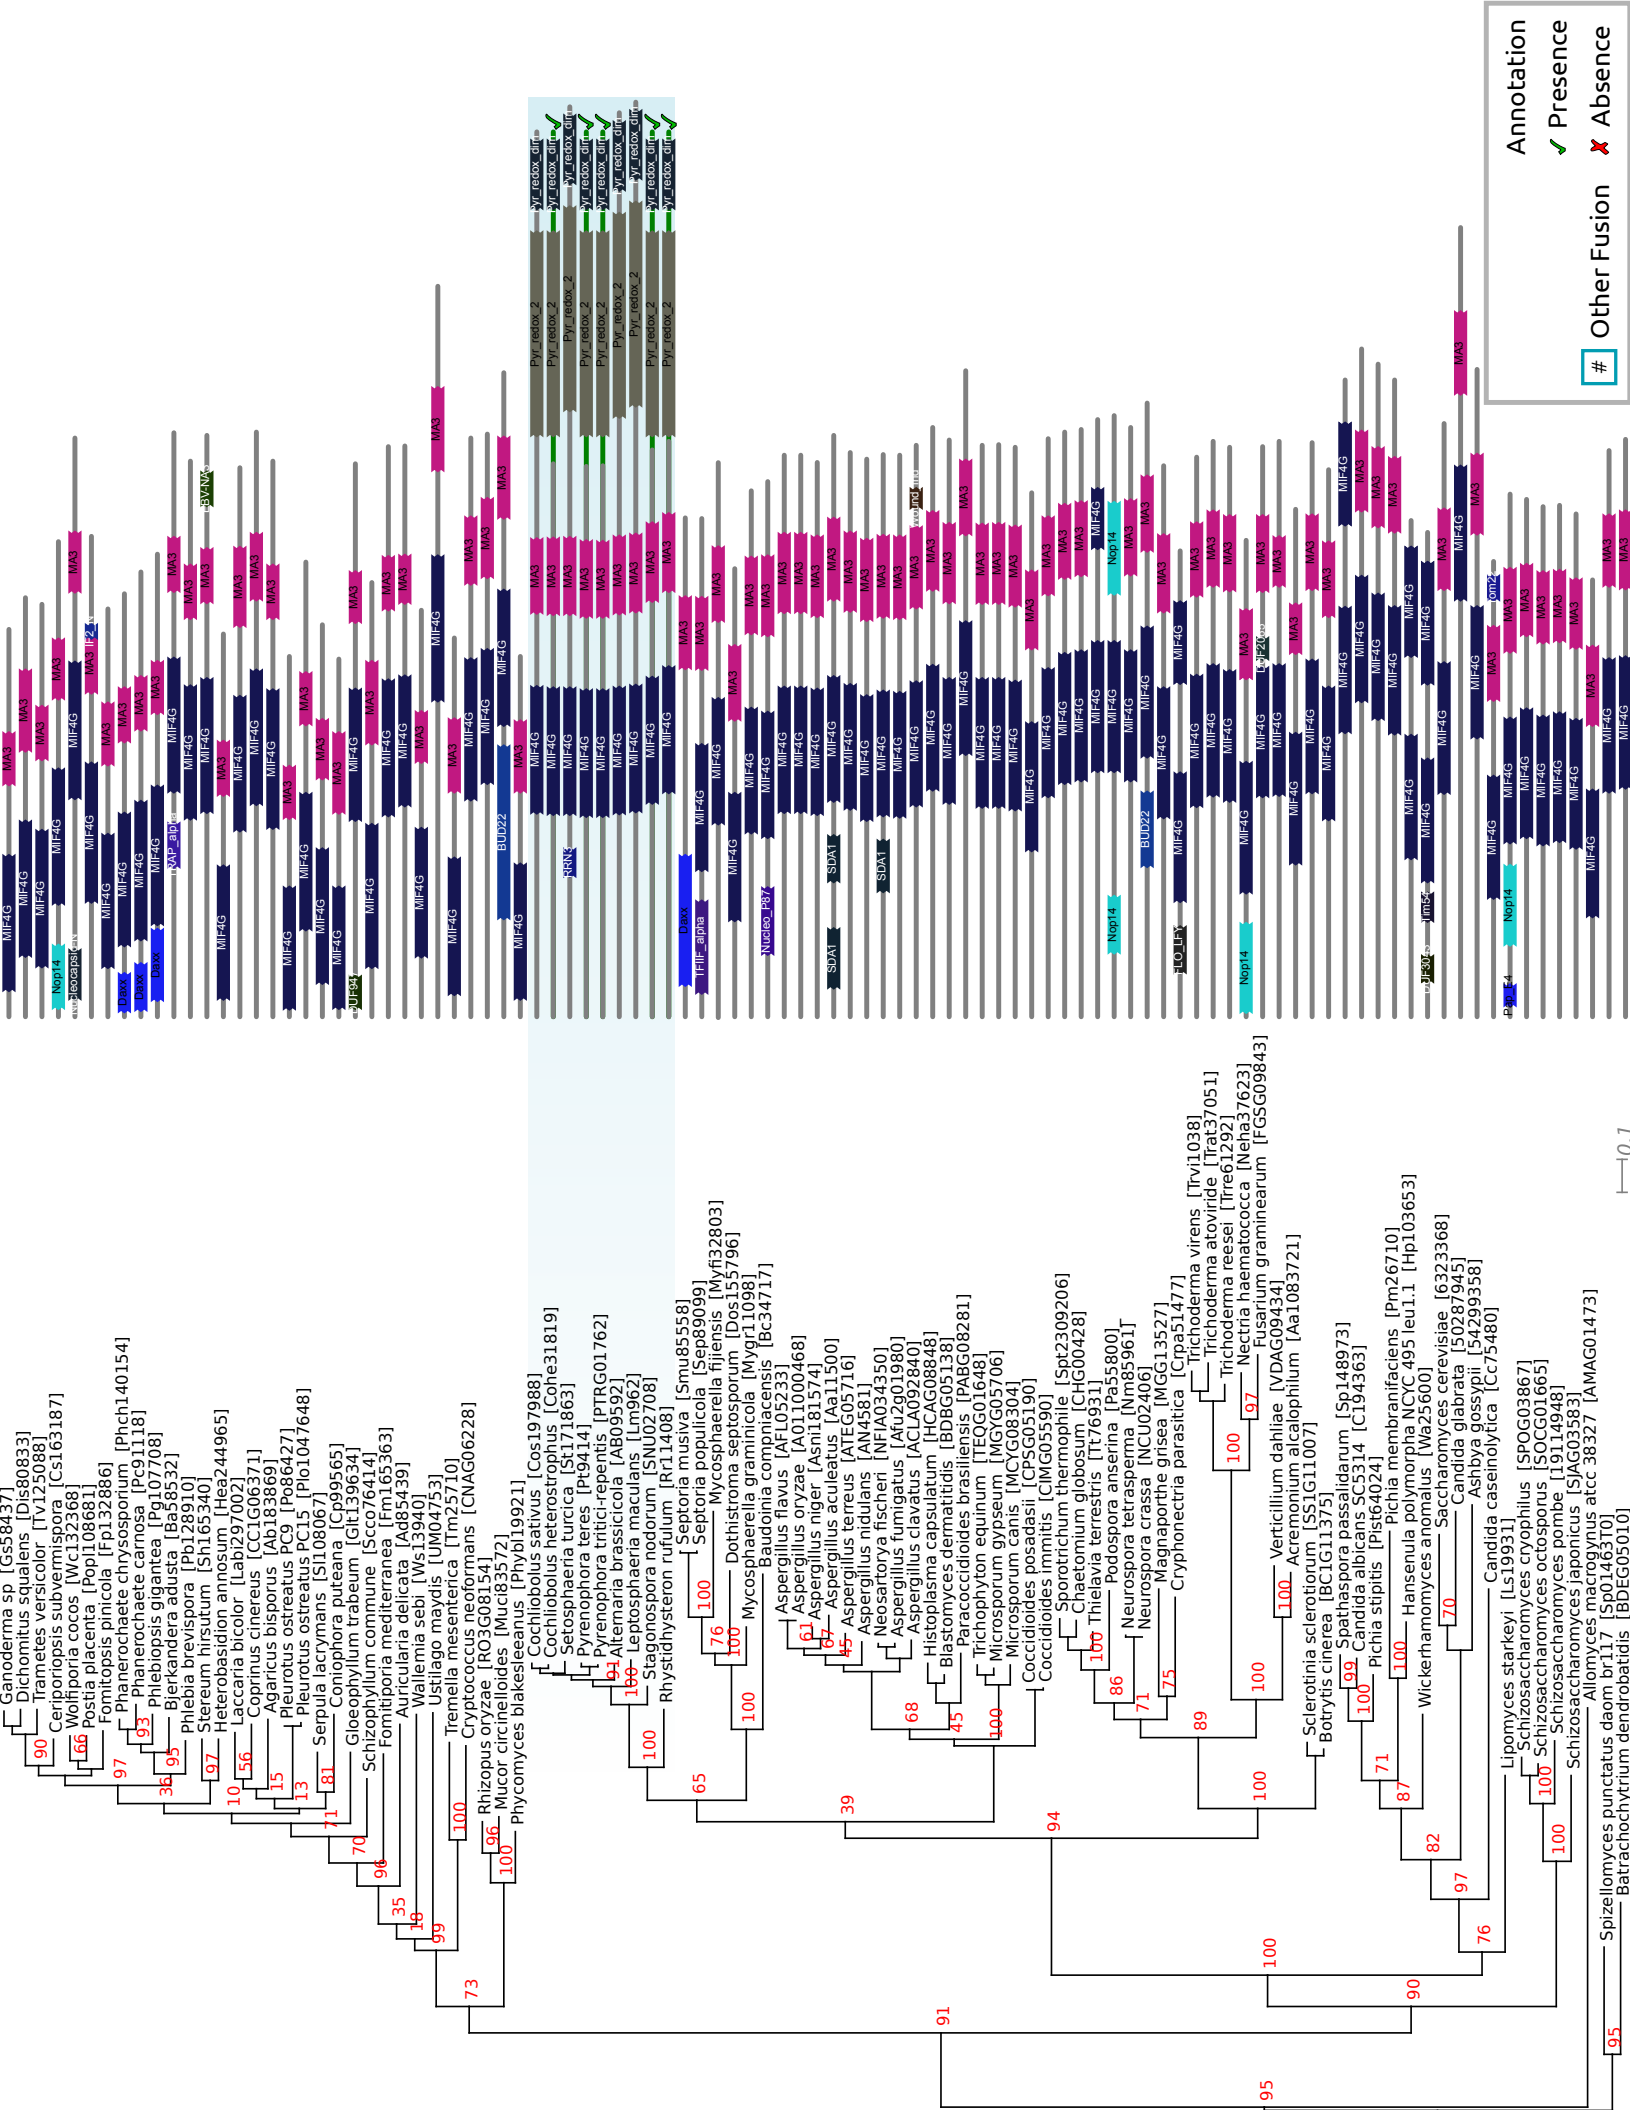





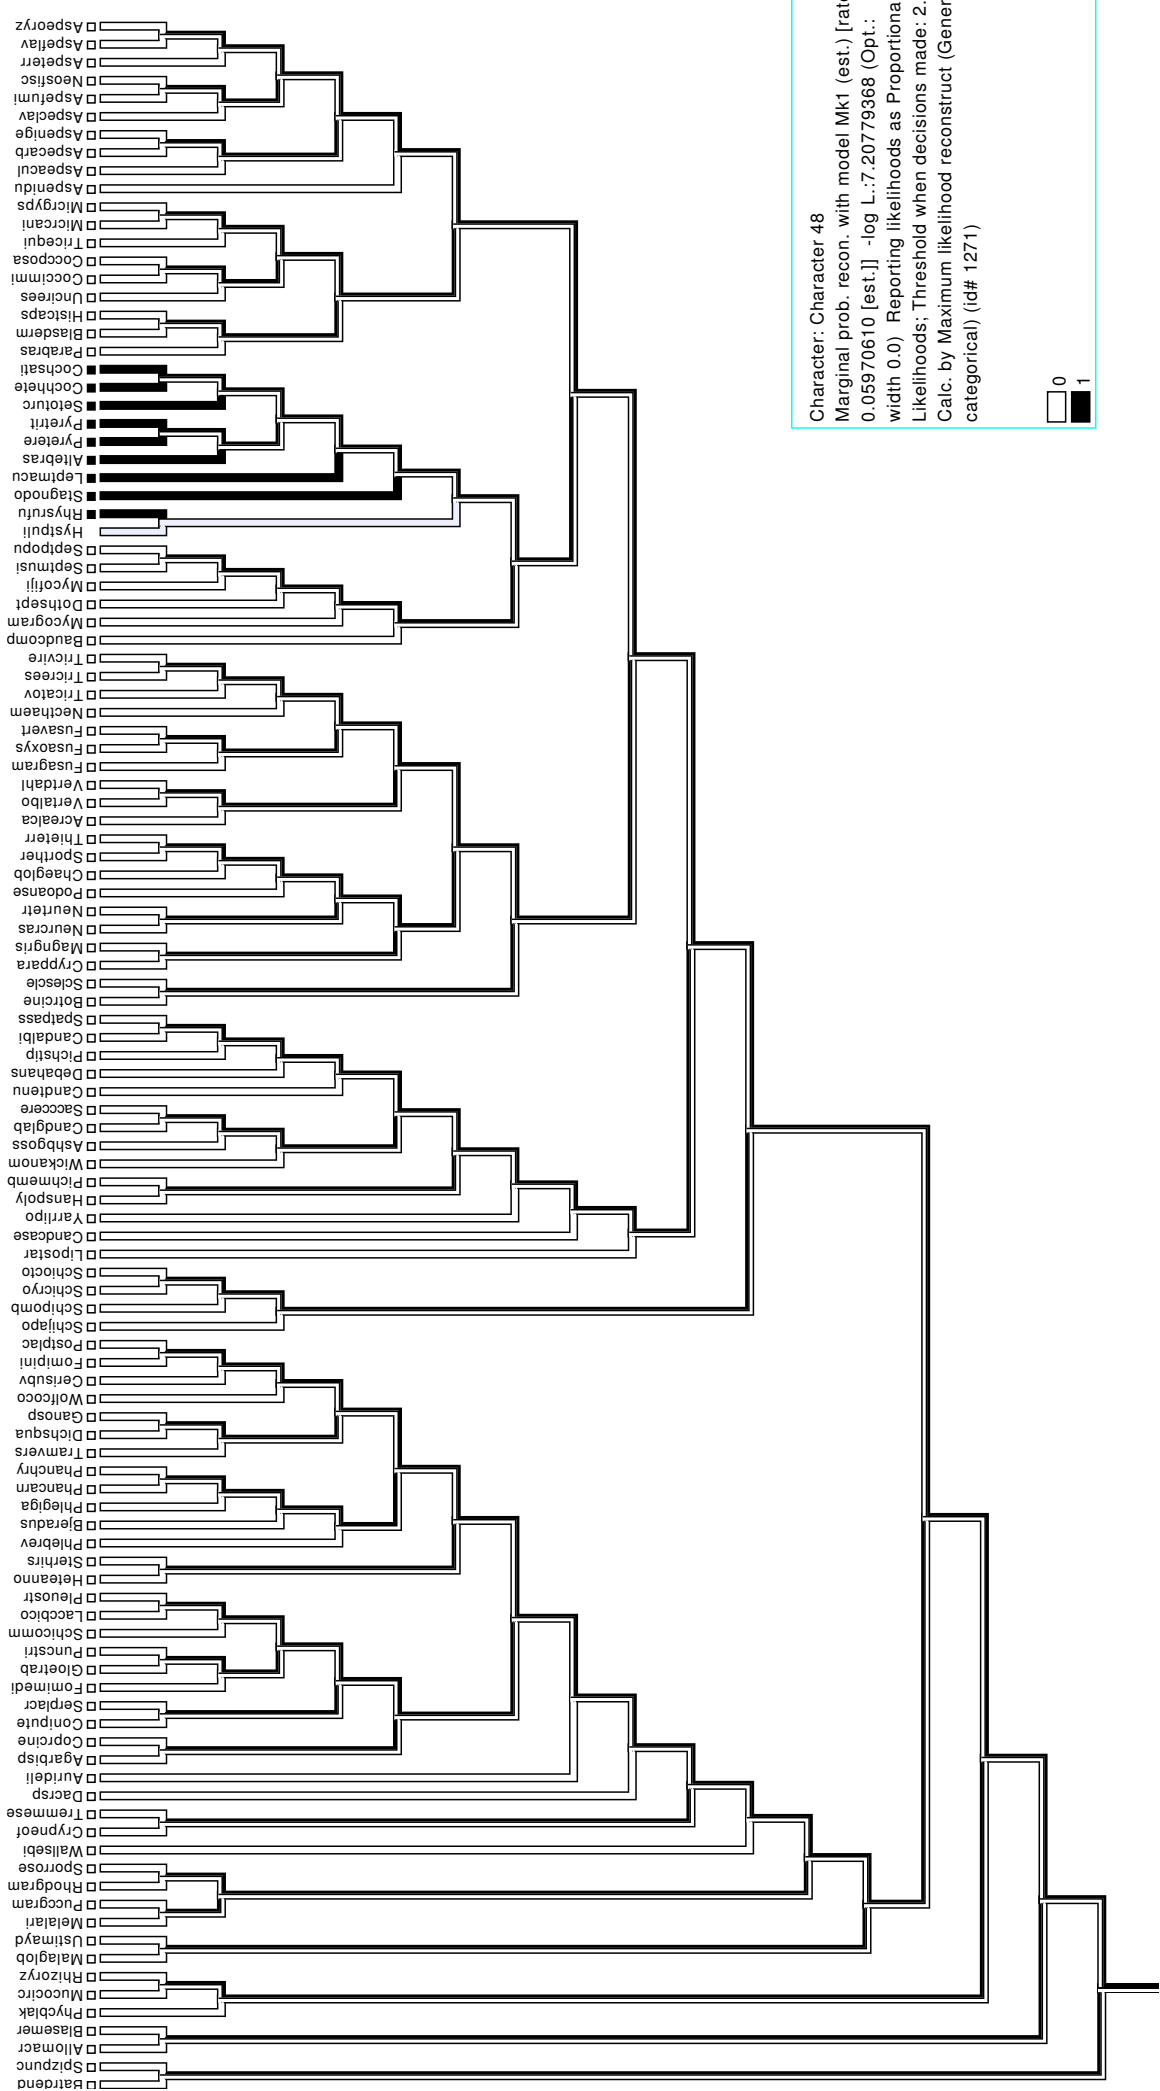

Character: Character 48  
 Marginal prob. recon. with model Mk1 (est.) [rate  
 0.05970610 [est.]] -log L.: 7.20779368 (Opt.:  
 width 0.0) Reporting likelihoods as Proportional  
 Likelihoods; Threshold when decisions made: 2.0  
 Calc. by Maximum likelihood reconstruct (Generic  
 categorical) (idf: 1271)

0  
 1

# Putative Fusion 48

October 5, 2012

## 1 Fasta Sequences

These are the unfused sequences identified by fdfBLAST belonging to the putative gene fusion in FASTA format. Accessions may be shortened, but belong to either the taxons individual genome project or NCBI's accession numbering.

```
>XP_0032968951Pyte_dom1
MADARGEYWYFEDGVDPNKITVPELRSILLRHGATYPSSARKGTLVSLFVDVVLQKPQV
QRMLAQTKRSTRGIVDVPSSASTADTDETEDELVAPTPATRRISRRTTRGTTEDVDVP
APRAKTPSRAVPAKHSRALESEVDERPATRRTRKSVTPAVKEPSPDPVAWHRNDAASPFT
QENPFQKGASSPAVDPDIARERRRRRTGYGRERRKSDALRRQTYQPSELQDDGISVPTR
RTFDMVDPRVKQEEDEEEDVVDAGEEFTPEEQLELVRERAQTGEVDILPPRRRQKA
KATGRIKAGAGTILLTAAAVFAGVWRQEKIDVGFCGVGRDATAALAGVDIPSWAGQILPQC
EPCPPHAQCYRGLKIKCDPDFIEKDHPLSLGGLVVPPTCEPDSEKTRKVNIGIANRAVEV
LRQRKAQYECGEPDSEGNPVESPEVSEKALKQHMASQKSKSLTDQEFSELDRAFPEVIM
REEVVETTNGTTGRRRLASTSLAKLSLVCSTRRYLRQSFERHLLKIIISVFLFAFLSLYGK
YSYTHNRSMEARAAQLASDAYDRLQDQAALSFLEPGAEGKISMTQLRDDILRTEFNASRR
QRLWTRVQAKVERNSNIRAGVRTTANGDVARMWEWIGPVKRLKRESGRFSLGMGSSP
>XP_0032968951Pyte_dom2
PSGNRVAKEVNVPKTRRTYCKGKDKCKHTQHKVTQYKAGKASLFAQGGKRRYDRKQSGYGG
QTKPVFHKRAKTTKKVVLRLLECTACKTKAQLALKRCKHFELGGDKKTKGAALVF
```

## 2 Annotated Phylograms

All trees were generated from an initial run of Darren's Orchard pipeline against 139 taxa (Table S1), using the above corresponding un-fused sequences as BLAST seeds. The alignments were then checked for any missing taxa, manually masked and then ProtTest3 was run, please see the Methods section for detail. The final trees were generated by the following command:

```
phymml -i alignment_file -d aa -b 100 -m model -c 8 -v invariant_sites -s BEST --quiet -a gamma
```

Styling and annotation was made possible by Dendroscope and Inkscape.

## 3 Mesquite Cladogram

This tree is the 68-gene concatenated phylogeny (Fig. 1), with the presence of a fusion (black), presence of a fission (white), and absent/undetermined (grey) status of gene fusion characters plotted on to it using a "1/0/-" nexus-style data matrix. We used the program 'Mesquite' to calculate proportional likelihoods based on either an "Mk1" or "Assym. 2 param model." (see Table S4) of character change across the fungal phylogeny (Fig. 1). This allowed for a proportional likelihood of the position of the fusion/fission to be calculated.



Cochliobolus heterostrophus [CohE27003]  
Cochliobolus sativus [Cos35146]  
Pyrenophora tritici-repentis [PTRG01838]  
Pyrenophora teres [Pt1143]  
Setosphaeria turcica [St117060]  
XP0032968951Pytedom2 [XP\_0032968951Pyte\_dom2\_]  
Rhizidhysteron rufulum [Rr9949]  
Alternaria brassicicola [AB08594]  
5 Stagonospora nodorum [SNU02602]  
Leptosphaeria maculans [Lm1097]  
Mycosphaerella graminicola [Mygr73399]  
4 Dothistroma septosporum [Dos54789]  
Mycosphaerella fijiensis [Myfi58945]  
Septoria musiva [Smu141364]  
Septoria populiicola [Sep48711]  
Fusarium oxysporum [FOXG05227]  
Acremonium alcalophilum [Aa1048000]  
Fusarium verticillioides [FVEG02906]  
Trichoderma atoviride [Trat146339]  
Trichoderma reesei [Trre79106]  
Trichoderma virens [Trvi86297]  
Fusarium graminearum [FGSG10181]  
6 Nectria haematococca [Neha69440]  
22 Verticillium albo-atrum [VDBG00439]  
Verticillium dahliae [VDAG00049]  
Cryphonectria parasitica [Crpa103506]  
Botrytis cinerea [BC1G07132]  
Sclerotinia sclerotiorum [SS1G05383]  
Neurospora crassa [NCU00706]  
Neurospora tetrasperma [Nm96495]  
21 Hysterium pulicare [Hp4262]  
14 Magnaporthe grisea [MGG00546]  
4 Podospora anserina [Pa14760]  
Thielavia terrestris [Tt2122170]  
33 Chaetomium globosum [CHG01328]  
Sporotrichum thermophile [Spt62593]  
8 Aspergillus nidulans [AN6181]  
8 Aspergillus flavus [AFL05598]  
3 Aspergillus aculeatus [Aa49581]  
Aspergillus niger [Asni211677]  
Aspergillus carbonarius [Ac400875]  
1 Neosartorya fischeri [NFIA083820]  
13 Aspergillus fumigatus [Afu2g08130]  
Aspergillus clavatus [ACL080000]  
Trichophyton equinum [TEQG02703]  
Microsporium gypseum [MGYG00874]  
Microsporium canis [MCYG00310]  
45 Coccidioides immitis [CIMG00888]  
Coccidioides posadasii [CPSG02669]  
Blastomyces dermatitidis [BDBG08158]  
Histoplasma capsulatum [HCAAG07397]  
Paracoccidioides brasiliensis [PABG08552]  
Phycomyces blakesleeanae [Phyb156965]  
Phycomyces blakesleeanae [Phyb132576]  
20 Phycomyces blakesleeanae [Phyb133634]  
Mucor circinelloides [Muci31337]  
Mucor circinelloides [Muci81995]  
Mucor circinelloides [Muci83445]  
10 Rhizopus oryzae [RO3G12309]  
Rhizopus oryzae [RO3G08796]  
Rhizopus oryzae [RO3G03329]  
Puccinia graminis [PGTG09489]  
Melampsora laricis-populina [Mela107807]  
Saccharomyces cerevisiae [6321934]  
76 Saccharomyces cerevisiae [6681849]  
Candida glabrata [50295351]  
Candida caseinolytica [Cc2419]  
23 Pichia membranifaciens [Pm51563]  
2 Candida tenuis [Ct115674]  
0 Spathaspora passalidarum [Sp62857]  
Wickerhamomyces anomalus [Wa82054]  
2 Pichia stipitis [Pist81825]  
15 Ashbya gossypii [45198552]  
30 Candida albicans SC5314 [C1949091]  
15 Yarrowia lipolytica [50545894]  
34 Lipomyces starkeyi [Ls41923]  
25 Debaryomyces hansenii [50424663]  
Allomyces macrogynus atcc 38327 [AMAG00981]  
80 Allomyces macrogynus atcc 38327 [AMAG02493]  
43 Blastocladiella emersonii [Bes30g07]  
Rhodotorula graminis [Rg31851]  
Sporobolomyces roseus [Spro26034]  
Schizosaccharomyces octosporus [SOCG05073]  
96 Schizosaccharomyces cryophilus [SPOG04743]  
Schizosaccharomyces pombe [19115216]  
52 Schizosaccharomyces japonicus [SJAG04626]  
13 Cryptococcus neoformans [CNAG04884]  
4 Wolfiporia cocos [Wc105582]  
Fomitopsis pinicola [Fp160025]  
21 Postia placenta [Popl122430]  
3 Trametes versicolor [Tv50052]  
Phlebia brevispora [Pb98665]  
39 Gloeophyllum trabeum [Glt63194]  
19 Stereum hirsutum [Sh85428]  
7 Punctularia strigosozonata [Pus102388]  
Coniophora puteana [Cp109567]  
14 Wallemia sebi [Ws62775]  
0 Schizophyllum commune [Scco111908]  
Agaricus bisporus [Ab180117]  
12 Laccaria bicolor [Lab1310126]  
12 Coprinus cinereus [CC1G05276]  
1 Serpula lacrymans [Sl149841]  
Pleurotus ostreatus PC15 [Plo45869]  
Phlebiopsis gigantea [Pg82850]  
98 Bjerkandera adusta [Ba257045]  
4 Phanerochaete chrysosporium [Phch3878]  
Auricularia delicata [Ad136046]  
26 Batrachochytrium dendrobatidis [BDEG04919]  
Soizellomyces punctatus daom br117 [So06444T01]

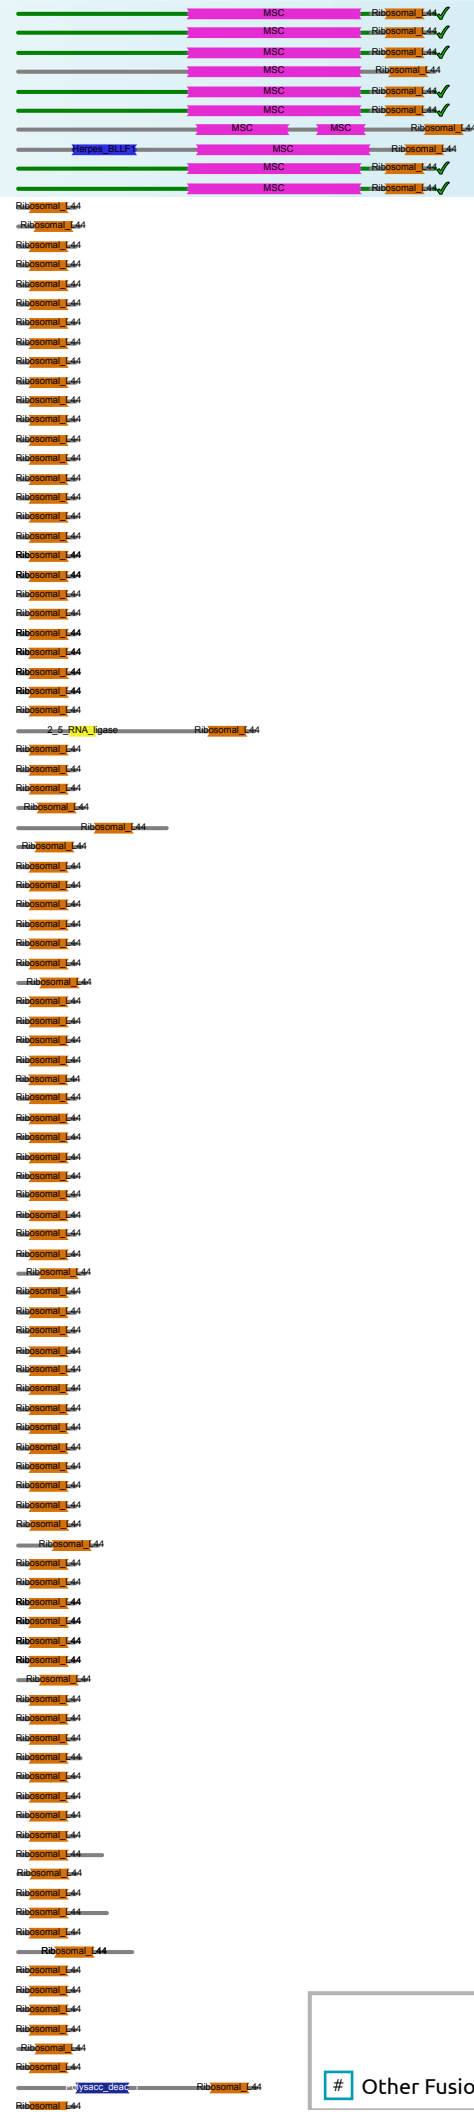

Annotation  
✓ Presence  
# Other Fusion  
✗ Absence

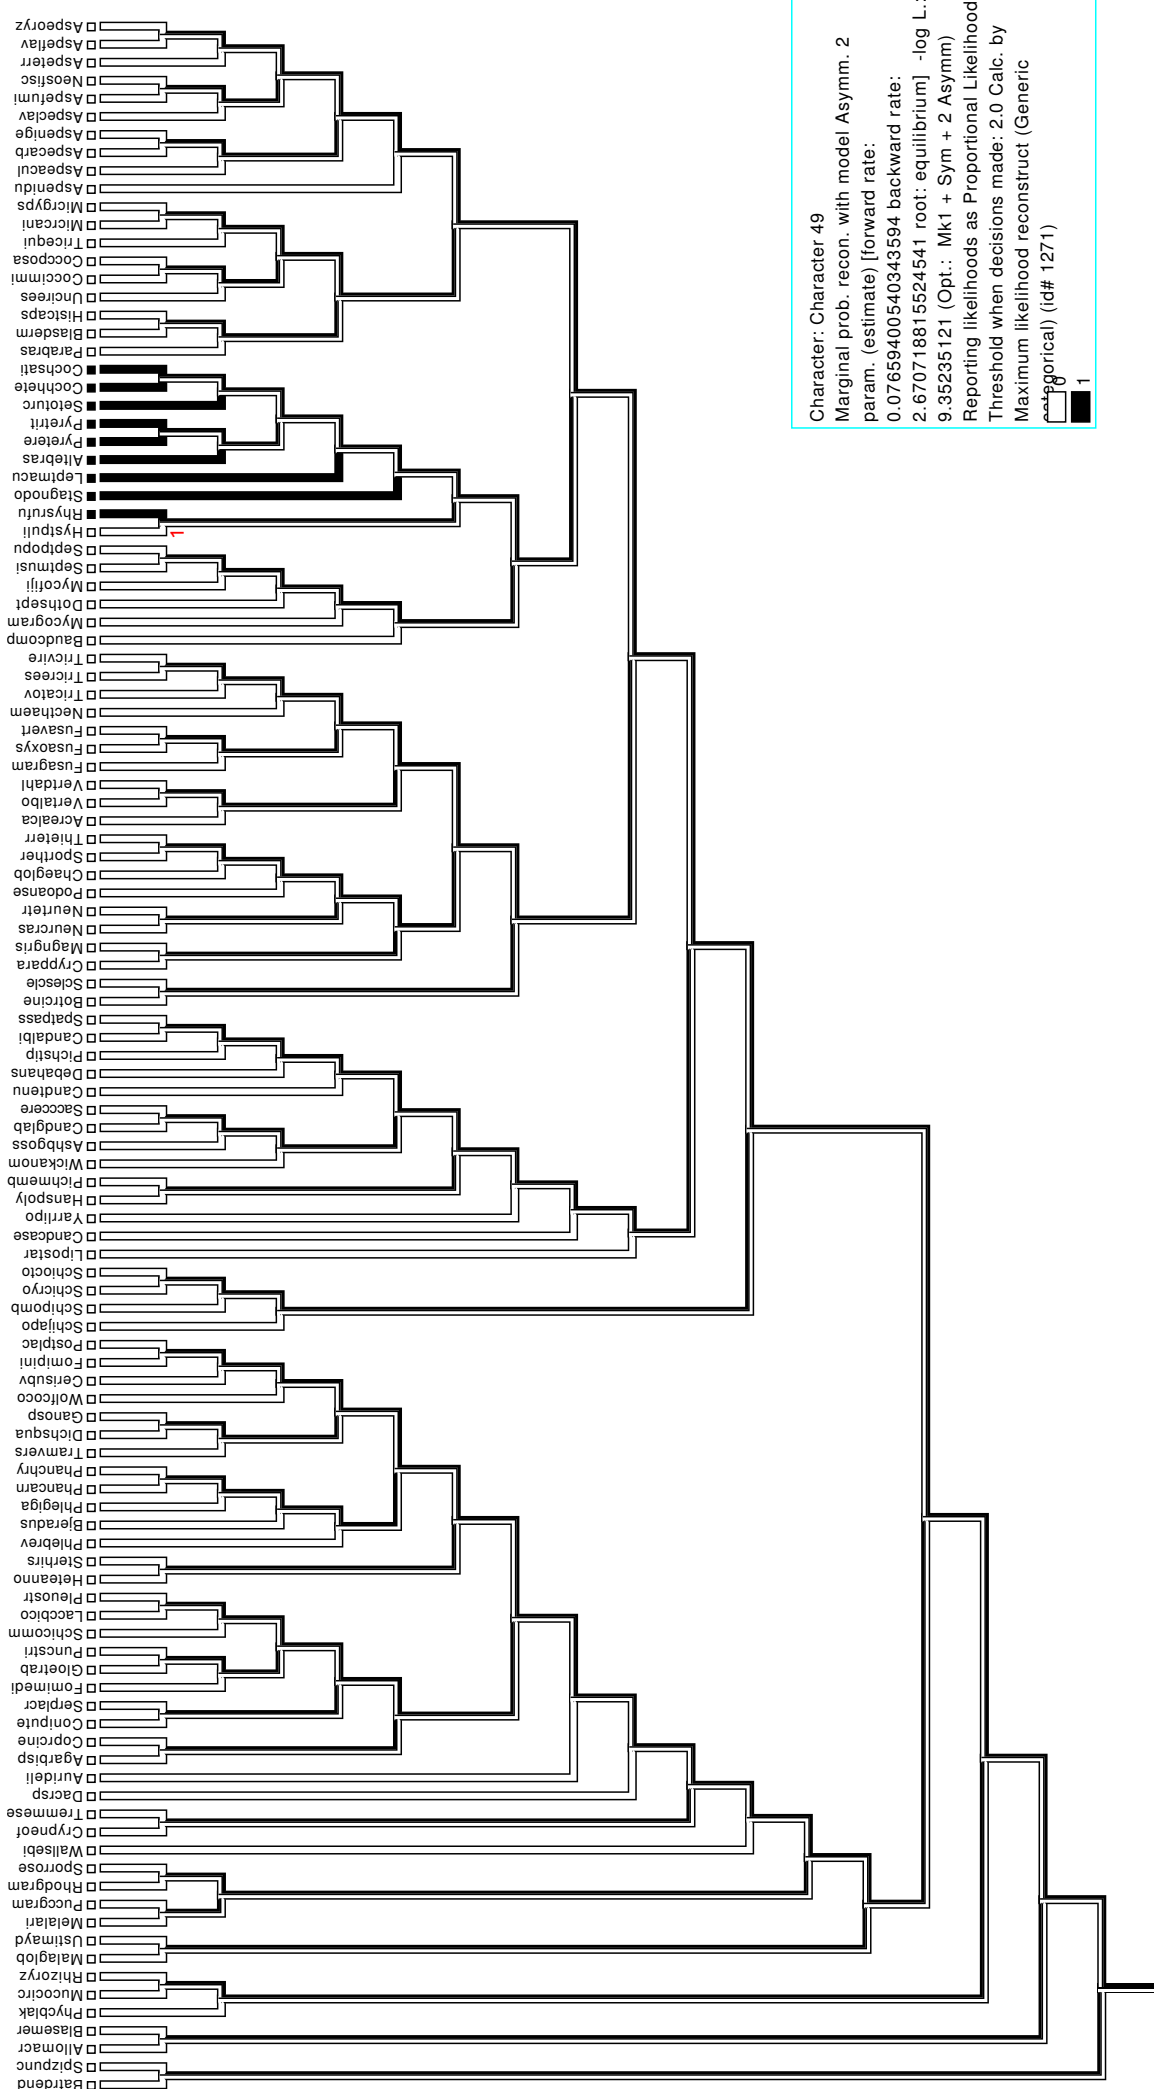

Character: Character 49  
 Marginal prob. recon. with model Asymm. 2  
 param. (estimate) [forward rate:  
 0.07659400540343594 backward rate:  
 2.670718815524541 root: equilibrium] -log L.:  
 9.35235121 (Opt.: Mk1 + Sym + 2 Asymm)  
 Reporting likelihoods as Proportional Likelihoods;  
 Threshold when decisions made: 2.0 Calc. by  
 Maximum likelihood reconstruct (Generic  
 Categorical) (id# 1271)

# Putative Fusion 49

September 27, 2012

## 1 Fasta Sequences

These are the unfused sequences identified by fdfBLAST belonging to the putative gene fusion in FASTA format. Accessions may be shortened, but belong to either the taxons individual genome project or NCBI's accession numbering.

```
>P1o1062711_dom1
MAIKIIKKRRTKHFKRHQSDRYVSVKEAWRKPKGIDNRVRRRFKGGQTPMPKIGYGSNKKTR
HLLPSGLKKFVNNVREVDLLMHNKSFAAEIAHNVSSRNRTVILERAALGKIKVTNAAA
>P1o1062711_dom2
RLRSEKDVRSASHAGSWYTDNRDELNEELEGWLEAVGPSEDFPVAGSKAIIAPHAGYSY
SGPAAAWAYKSIGTTGIKRVFILGPSHHFYLEGALSRCKEYETPIGNLPLDIDTINELR
ATNEFEDLSLKADEAEHSLEMHLPLYVRKIFEGQDISIVPIVVGAIKSKLEASYGKLLAPF
LSREDTFCVSSDFCHWYAITSCLLQIHAYYQAGIRGTRFSYTYYPPEPAPSDKPGINLT
RSVQPSTSHRIHKSIERLDREAMDLLAMPSSAKDAHANFAEYLAQTHNTICGRHPIGVL
LGALAELEESRKSTLKWVRYEQSSACVNIADSSVSYASAVVRF
```

## 2 Annotated Phylograms

All trees were generated from an initial run of Darren's Orchard pipeline against 139 taxa (Table S1), using the above corresponding un-fused sequences as BLAST seeds. The alignments were then checked for any missing taxa, manually masked and then ProtTest3 was run, please see the Methods section for detail. The final trees were generated by the following command:

```
phym1 -i alignment_file -d aa -b 100 -m model -c 8 -v invariant_sites -s BEST --quiet -a gamma
```

Styling and annotation was made possible by Dendroscope and Inkscape.

## 3 Mesquite Cladogram

This tree is the 68-gene concatenated phylogeny (Fig. 1), with the presence of a fusion (black), presence of a fission (white), and absent/undetermined (grey) status of gene fusion characters plotted on to it using a "1/0/-" nexus-style data matrix. We used the program 'Mesquite' to calculate proportional likelihoods based on either an "Mk1" or "Assym. 2 param model." (see Table S4) of character change across the fungal phylogeny (Fig. 1). This allowed for a proportional likelihood of the position of the fusion/fission to be calculated.

Annotation

✓ Presence

✗ Absence

# Other Fusion

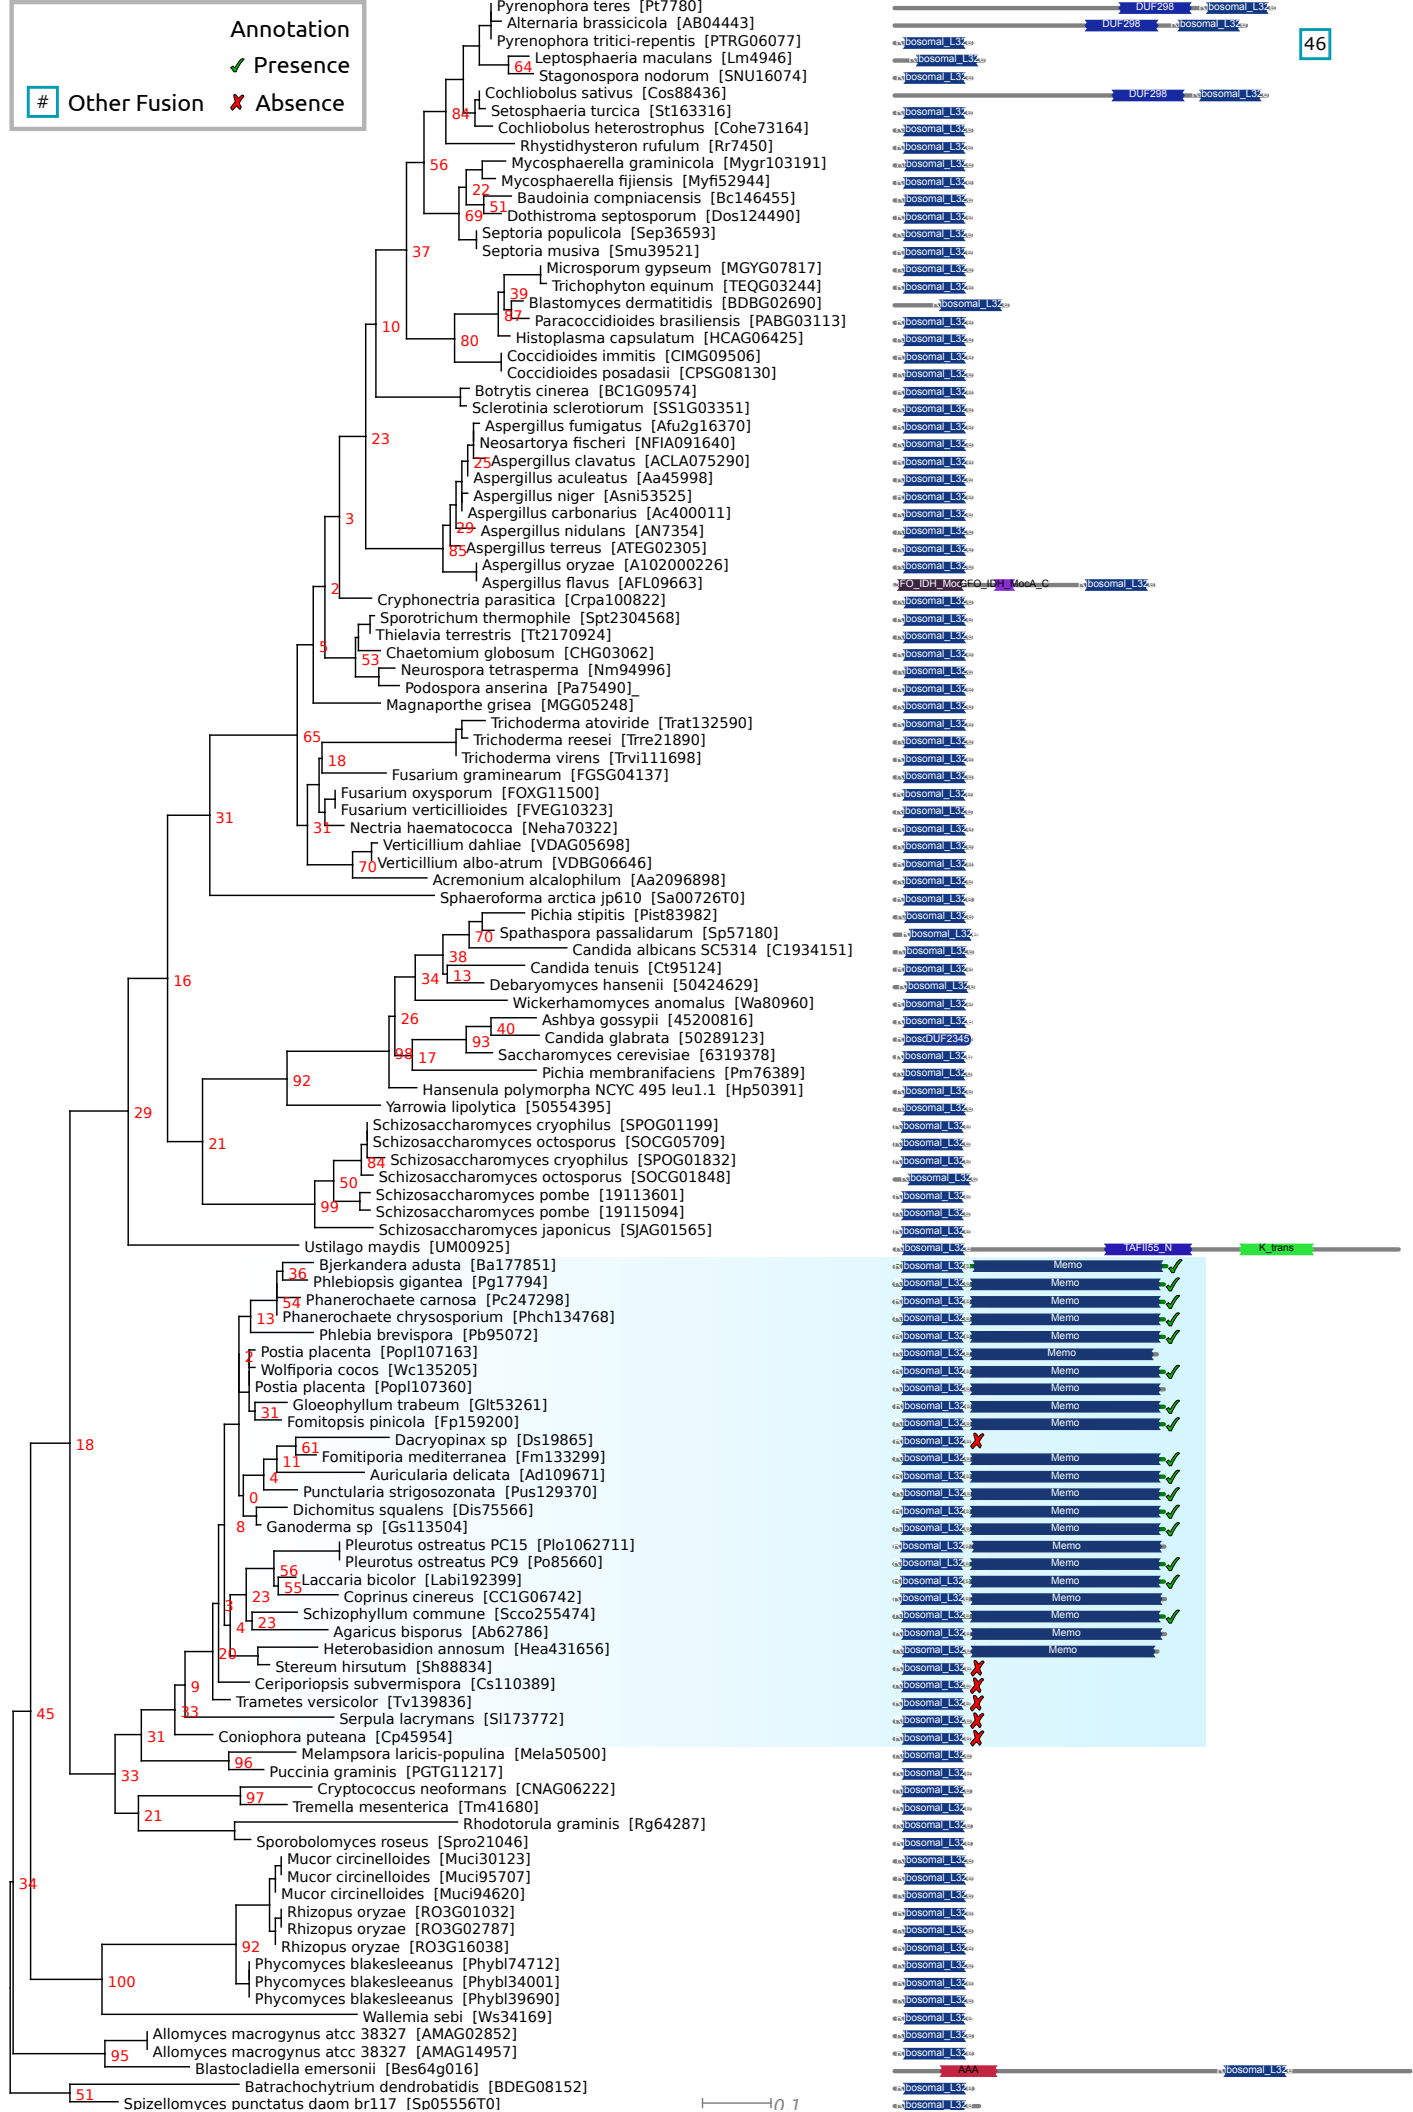



# Annotation

✓ Presence

✗ Absence

# Other Fusion

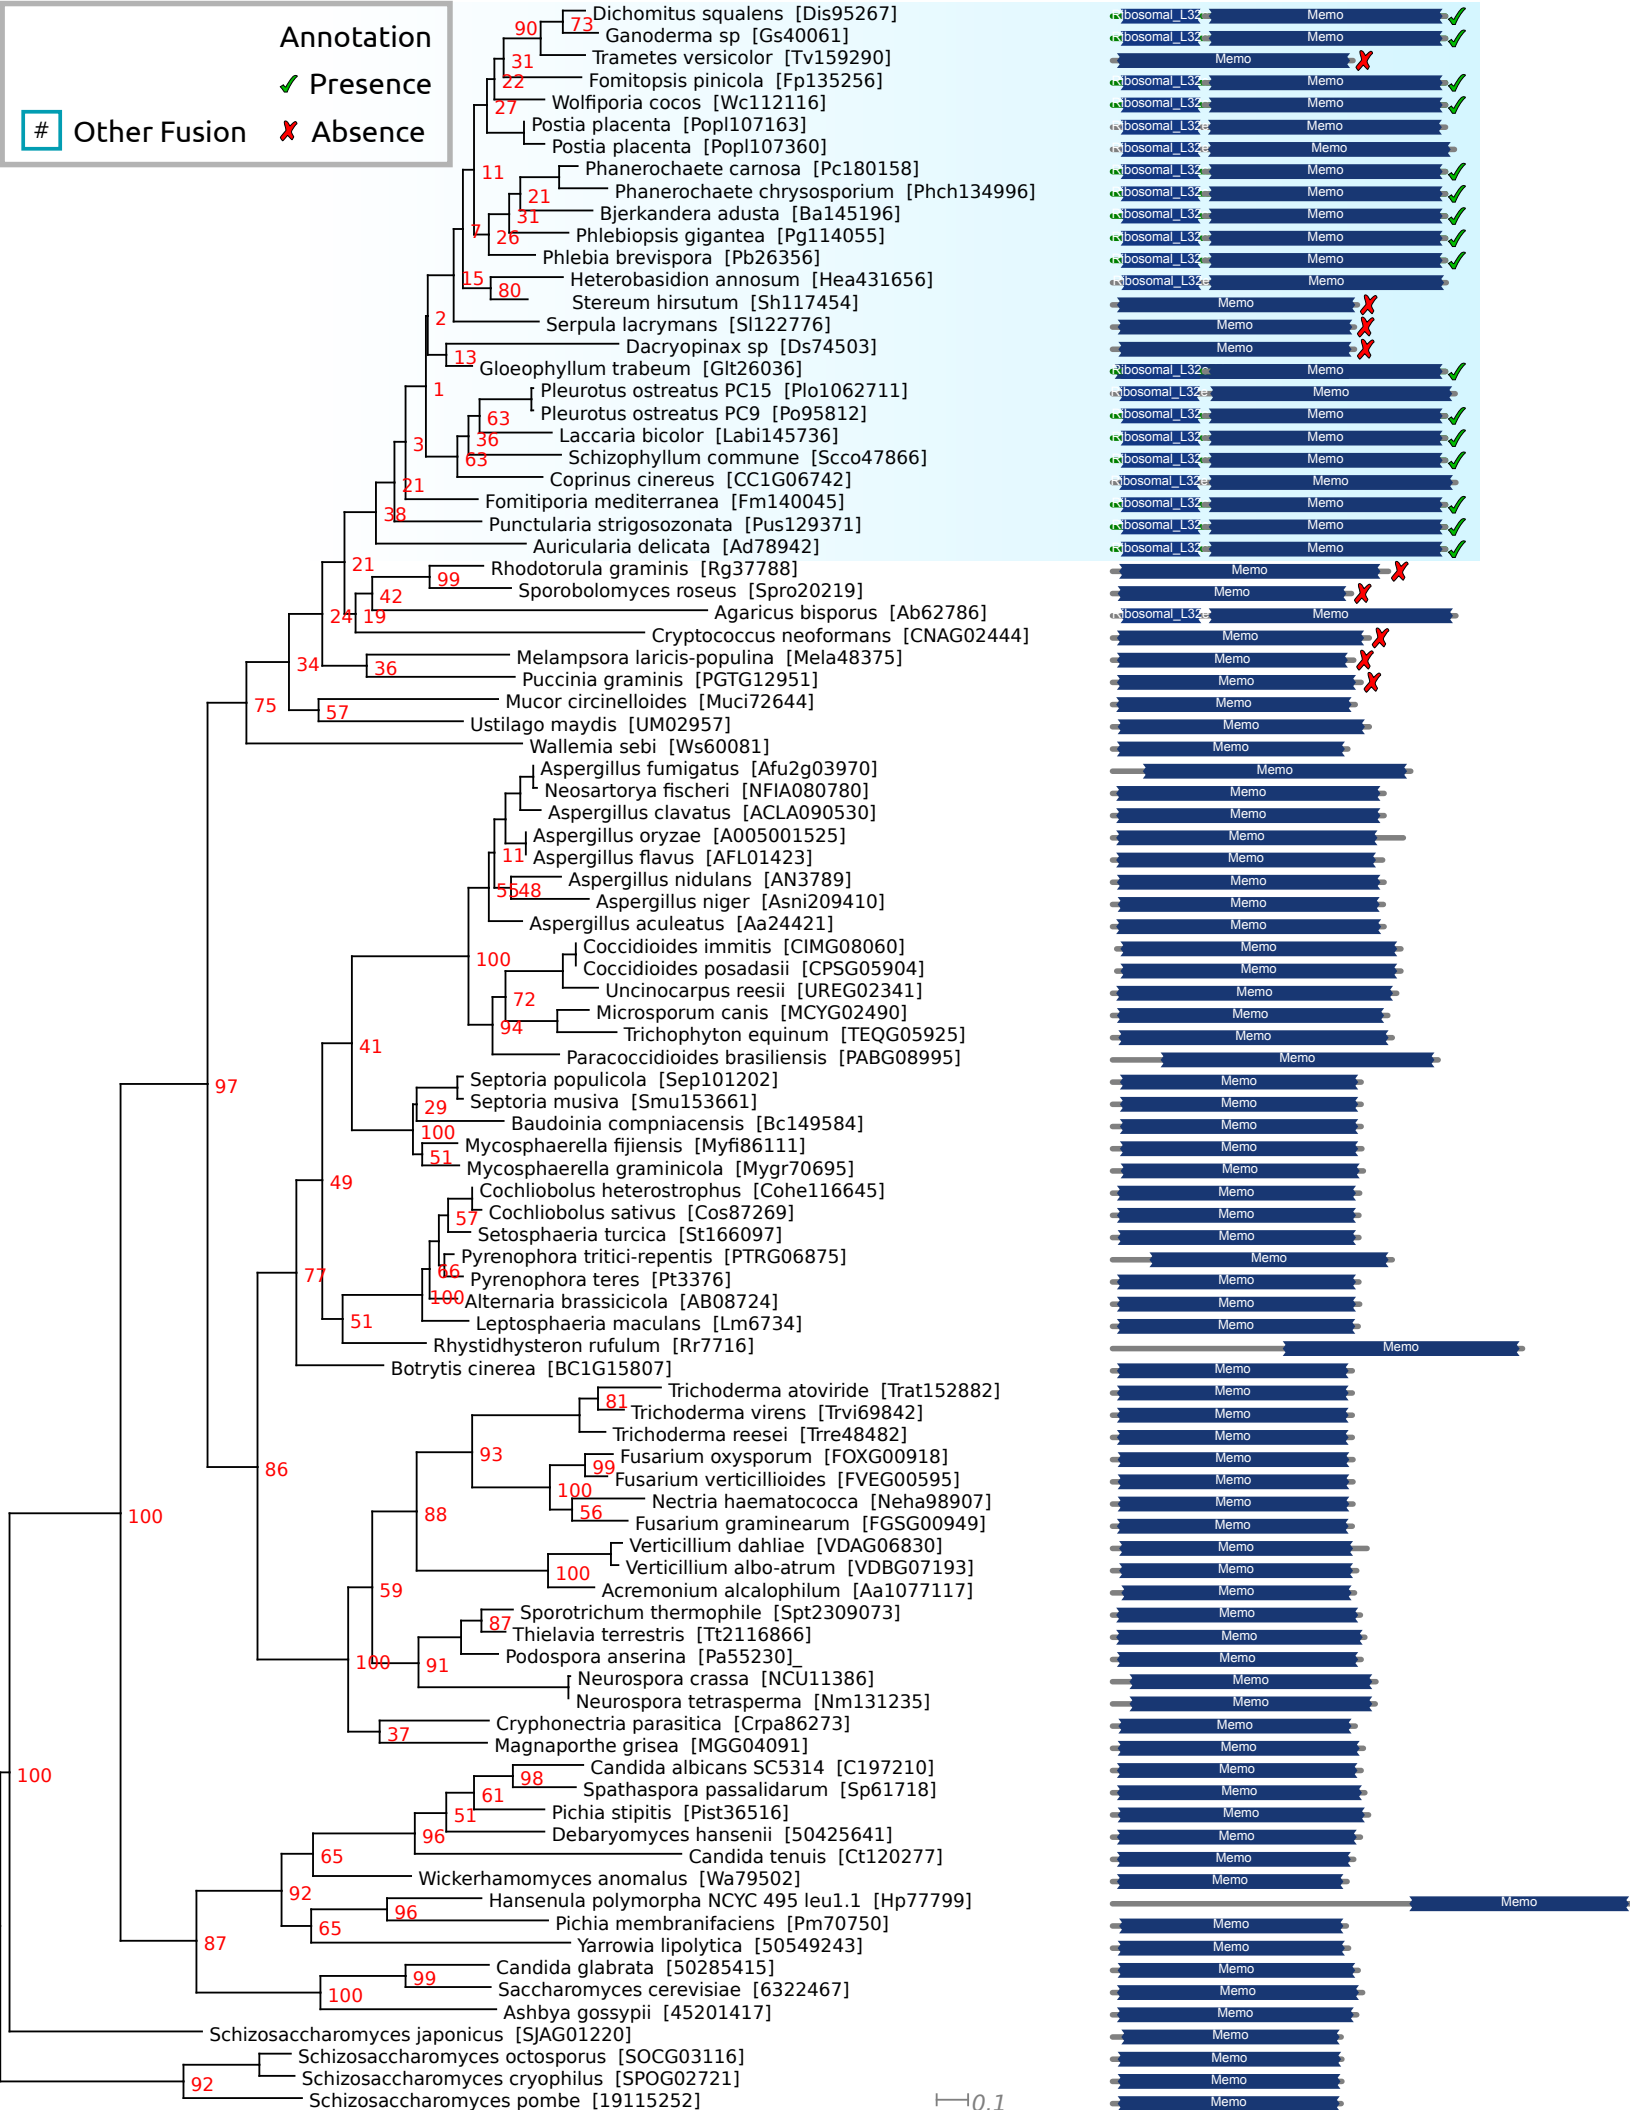

10.1

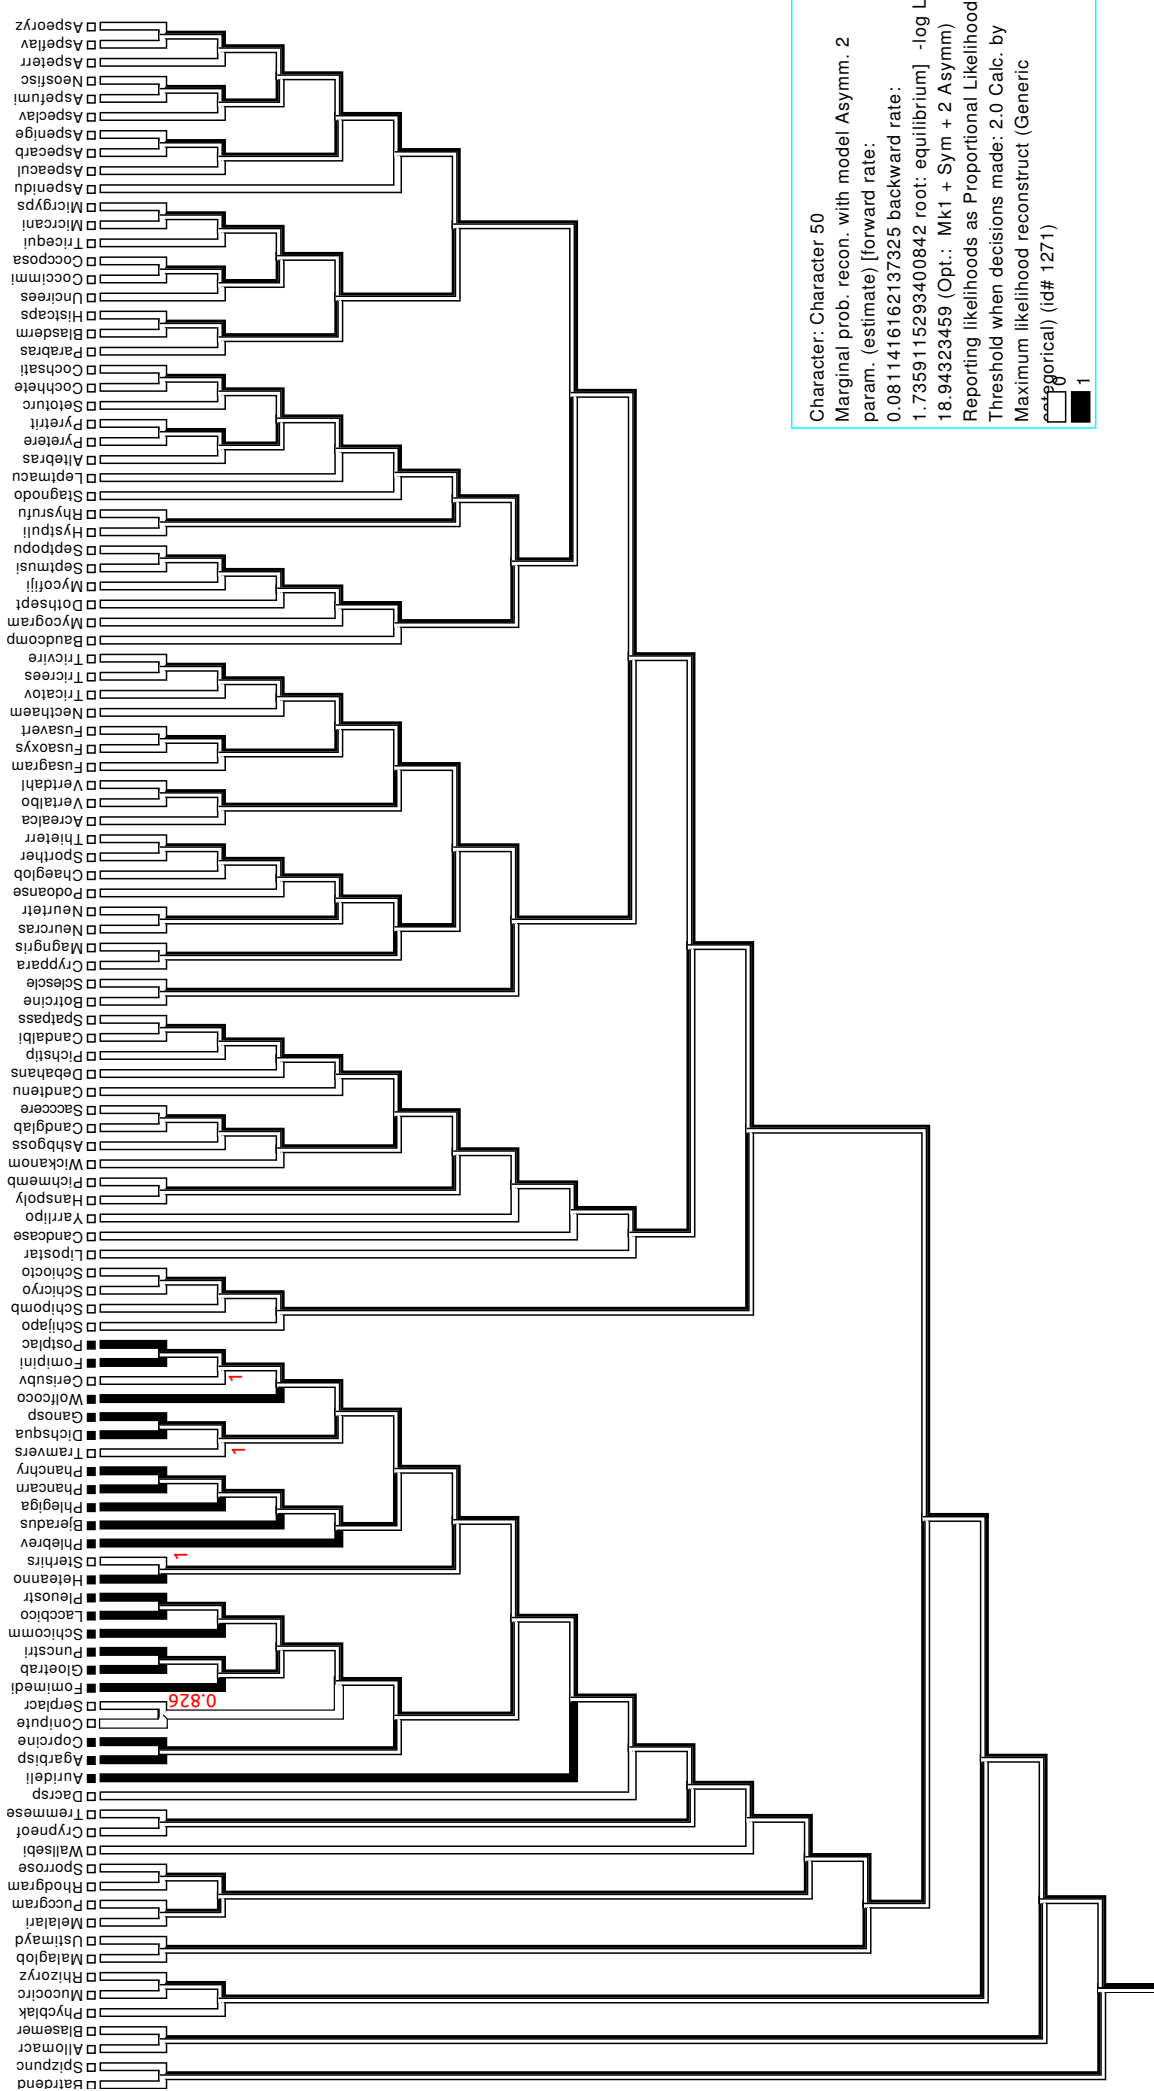

Rattand  
 Spizunc  
 Allomacr  
 Blasemer  
 Phyciak  
 Mucocitc  
 Rhizoryz  
 Malaglob  
 Ustimayd  
 Melatari  
 Puccgram  
 Rhodgram  
 Sporose  
 Wallsebl  
 Cypneot  
 Tremmese  
 Dacrsp  
 Auridel  
 Agarhisp  
 Coprine  
 Conipute  
 Serplac  
 Fomimed  
 Gloetrab  
 Puncstri  
 Schicomm  
 Laccbico  
 Pleuost  
 Heteanno  
 Sterhirs  
 Phlebrev  
 Bjeradus  
 Phlegga  
 Phancarn  
 Phanchry  
 Tamvers  
 Dichsqua  
 Ganosp  
 Wolfcoco  
 Censubv  
 Fompmi  
 Postplac  
 Schipomb  
 Schicyo  
 Schiocto  
 Lipostar  
 Candcace  
 Yarrilpo  
 Hanspoly  
 Pichmemb  
 Wikanom  
 Ashbgoss  
 Candglab  
 Saccere  
 Candtenu  
 Debahans  
 Pichstip  
 Candalbi  
 Spatpass  
 Botcine  
 Sclescle  
 Cyppara  
 Magngfris  
 Neurcras  
 Neurtr  
 Podanse  
 Chaeglob  
 Sporthr  
 Thieterr  
 Acrealca  
 Vertalbo  
 Fusagram  
 Fusoxys  
 Fusavert  
 Necthaem  
 Tricatov  
 Tricrees  
 Tricvire  
 Baudcomp  
 Mycogram  
 Dothsept  
 Mycotiji  
 Sepimus  
 Sepipopu  
 Hyspuli  
 Rhystrfu  
 Stagnodo  
 Lepimacu  
 Aliebras  
 Pyeter  
 Pyetrit  
 Setoturc  
 Coohete  
 Cochsatl  
 Parabras  
 Blasderm  
 Histcaps  
 Unctrees  
 Cocclm  
 Cocoposa  
 Tricequi  
 Micrcani  
 Micrgyps  
 Aspensidu  
 Aspacul  
 Aspacarb  
 Aspacige  
 Aspaclav  
 Aspacum  
 Neostisc  
 Aspetter  
 Aspetlav  
 Aspetryz

Character: Character 50  
 Marginal prob. recon. with model Asymm. 2  
 param. (estimate) [forward rate:  
 0.0811416162137325 backward rate:  
 1.7359115293400842 root: equilibrium] -log L.:  
 18.94323459 (Opt.: Mk1 + Sym + 2 Asymm)  
 Reporting likelihoods as Proportional Likelihoods;  
 Threshold when decisions made: 2.0 Calc. by  
 Maximum likelihood reconstruct (Generic  
 categorical) (id# 1271)

1

# Putative Fusion 50

September 27, 2012

## 1 Fasta Sequences

These are the unfused sequences identified by fdfBLAST belonging to the putative gene fusion in FASTA format. Accessions may be shortened, but belong to either the taxons individual genome project or NCBI's accession numbering.

```
>XP_0012096401Aste_dom1
MATWAYPPLPAEHLREADSALARELEWLLRSLQDSLTSLEGLRECAVLLAPKEPGSTL
VLSSLRSEHVKGFVTRVGTIKVKGDIQLRLNSLASPRGSGNTRLCSSSPTAPELVLHQL
VSVRNLVNQSLDIVDVSATWGDPNANFIFSQHLHLLHETISEARQLLKGENDNTRGKWW
TSAEEEMFDPPLPPYLSFQLLIADSALVLYLRTLESATPHTPTAFATDISLTGFNLRDR
LFGTRHRAHDEAGDVFTWKGEVVKHQETGRWKLGRRYASSASSETADKHADRKDAIYGVI
DKINENEVELAELMDELNLLDDYHGAINFDGPDYDDAVSQTIGQRDHQMLEARVRMARQQ
FGDVLPDGYLNATETELYTQLYGEPPIIRHEEPEGALNIEETESDTLLREDGKGGWEEVQY
>XP_0012096401Aste_dom2
ERFESDAEVPLVYDMEVGPLEDESAAAMQRTREVAEQLGGEVMLEQFEDEANPDSTPRLHP
LTVEGKFSTDPSTVFLPKDVTGPIISVILSDYSNKHIADVAHRVFGGTRVPYSTTTTPPR
AQMPQLPIPLEASQRHMSEMEANAYIATLYPGMYASVLSVLTEVRKRLGSDWIRQLLTQE
GGPHVLDASAGGAGVLAWRDVLAWEWELMVPDHPQSSPYVGRSTVVTGSETLRLRASLM
LENTSFLPRLPDYVHIREKPTLDDQRAPPKRKQYDVIIAPHSLLGIEEYMRKEHVENLW
NLLNPNGGVLILLEKGHQKGFETIAGARDMLLRHISSPGSVQYEDFLQSPGGGKYVNKE
AGMIIAPCTNHEKCPMFNVAGHSGRKYCHFEQRYIRPPFLQRILGIKDRNHEDVKFSY
VAVQRGVDRREKDGIVQGAATDAAFVGYEHLHDSPAEQSEATEEPTSTTAEGSERPSAE
GAEQFHALLTPRIVYPPMKRRGHVIFDLCTSAGKIERWTVPRSYSRRAFKDARKAQWGDL
WALGAKTRIPRSLRLGDKHGEKKERLARRAVERAEMNETEEMQLEEAGSAWPDLPVPKR
KKGQNI PSWKKHADKKLRQATKKHAAAQLAHDDSLA
```

## 2 Annotated Phylograms

All trees were generated from an initial run of Darren's Orchard pipeline against 139 taxa (Table S1), using the above corresponding un-fused sequences as BLAST seeds. The alignments were then checked for any missing taxa, manually masked and then ProtTest3 was run, please see the Methods section for detail. The final trees were generated by the following command:

```
phymml -i alignment_file -d aa -b 100 -m model -c 8 -v invariant_sites -s BEST --quiet -a gamma
```

Styling and annotation was made possible by Dendroscope and Inkscape.

## 3 Mesquite Cladogram

This tree is the 68-gene concatenated phylogeny (Fig. 1), with the presence of a fusion (black), presence of a fission (white), and absent/undetermined (grey) status of gene fusion characters plotted on to it using a "1/0/-" nexus-style data matrix. We used the program 'Mesquite' to calculate proportional likelihoods based on either an "Mk1" or "Assym. 2 param model." (see Table S4) of character change across the fungal phylogeny (Fig. 1). This allowed for a proportional likelihood of the position of the fusion/fission to be calculated.

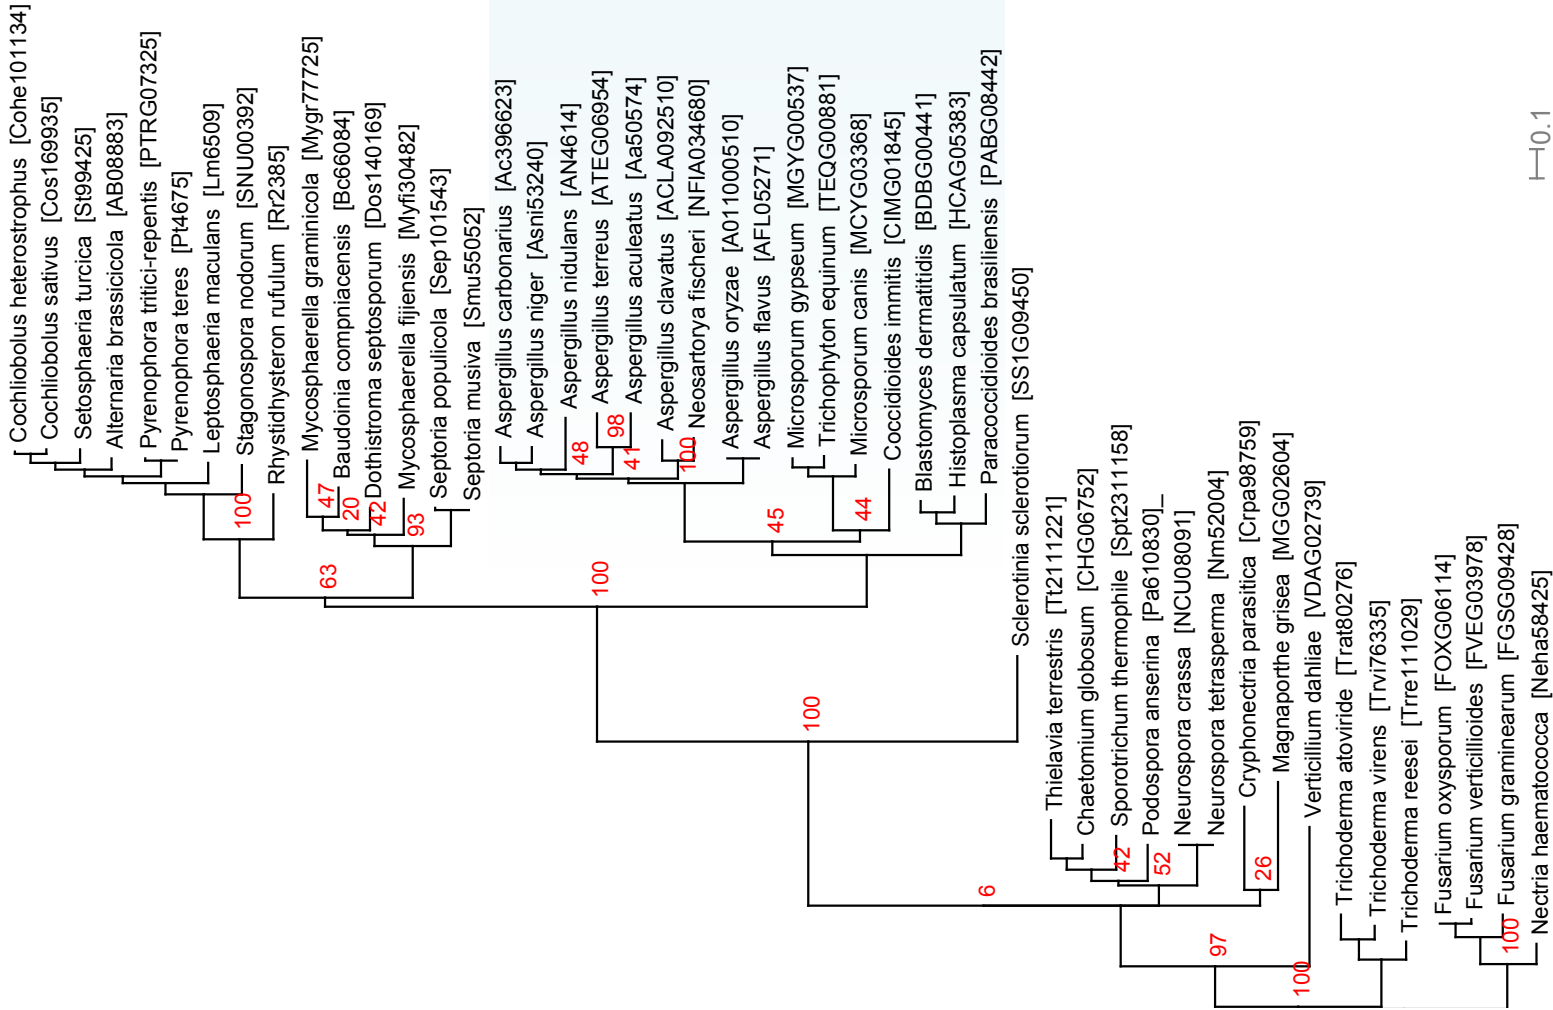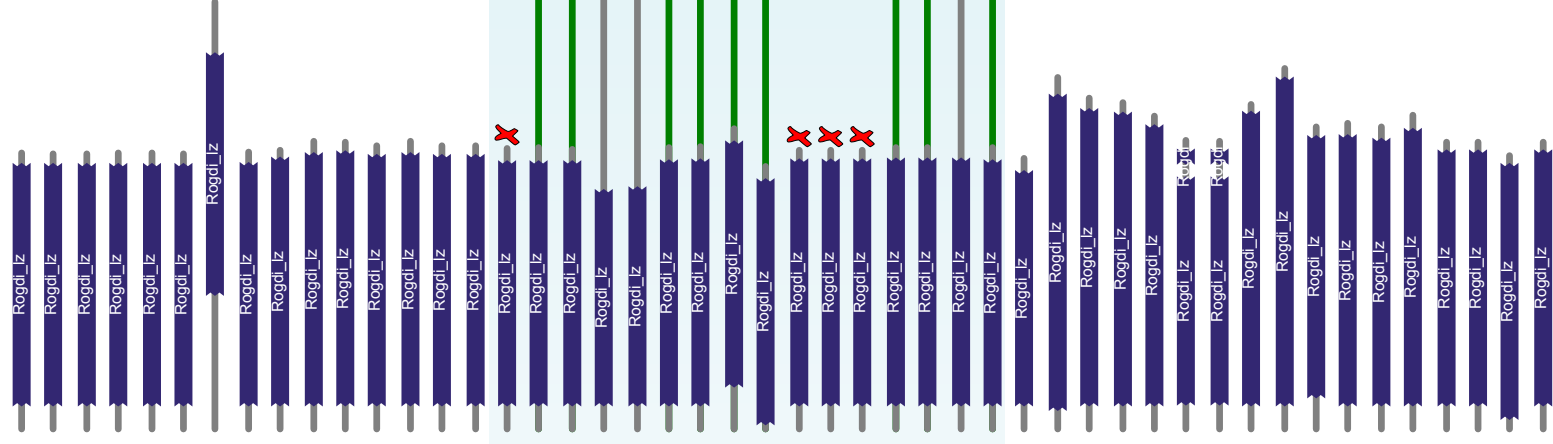

Annotation

✓ Presence

✗ Absence

# Other Fusion

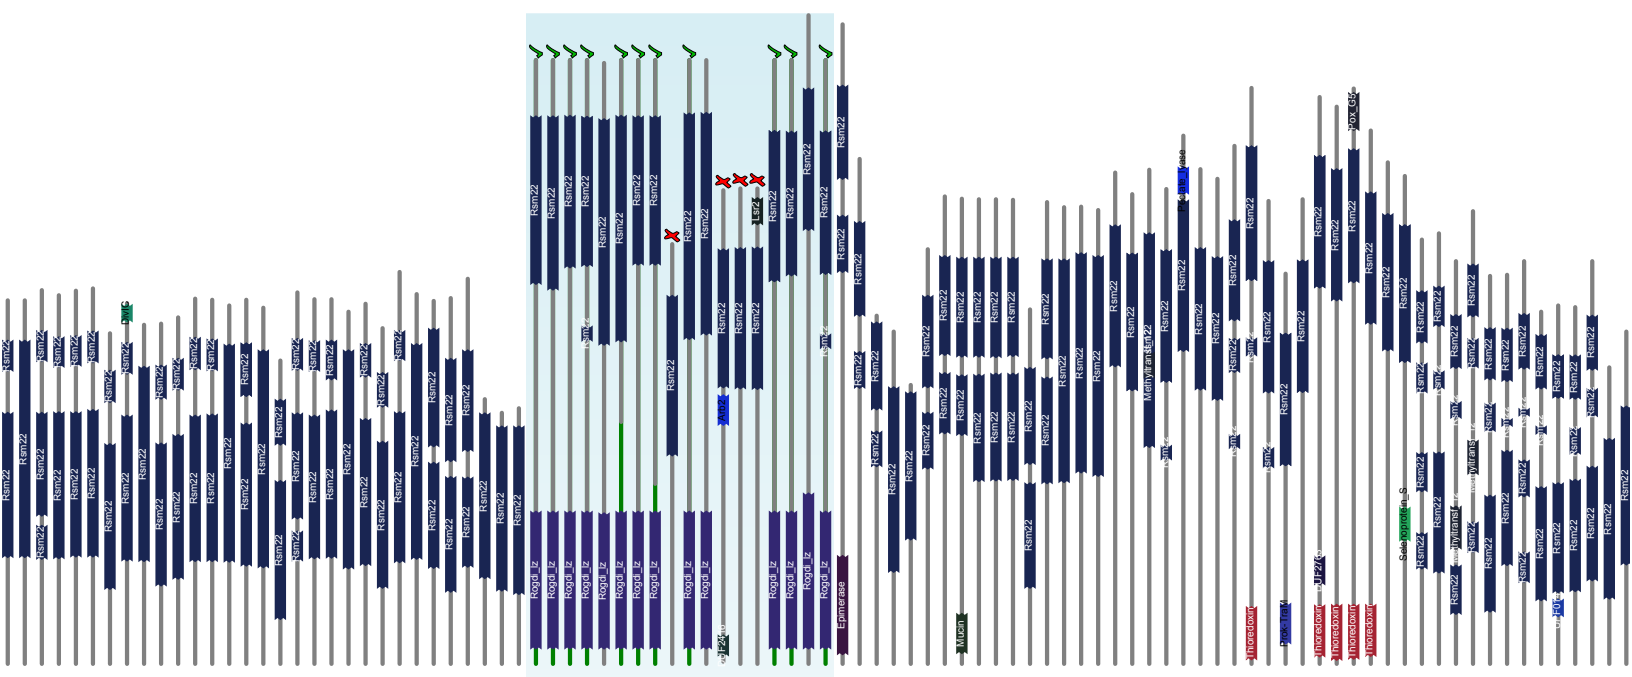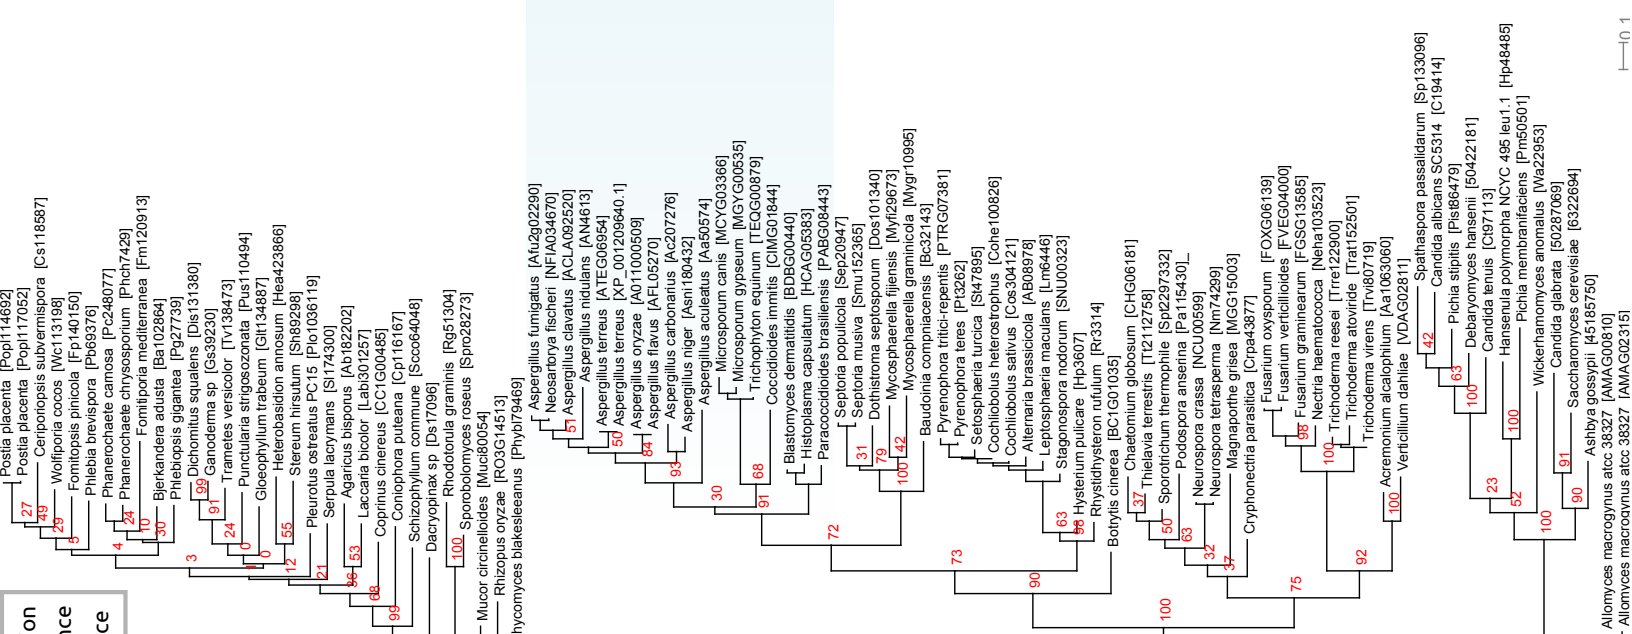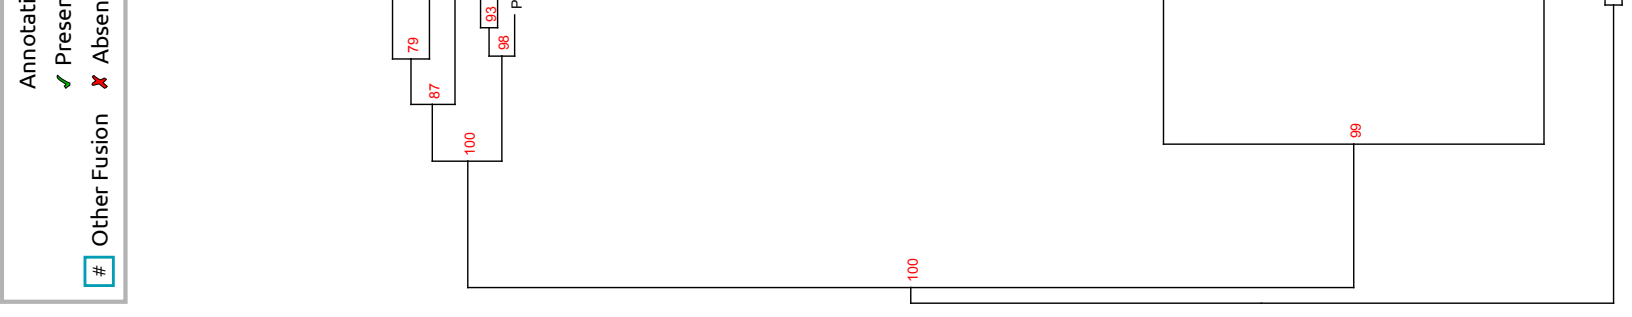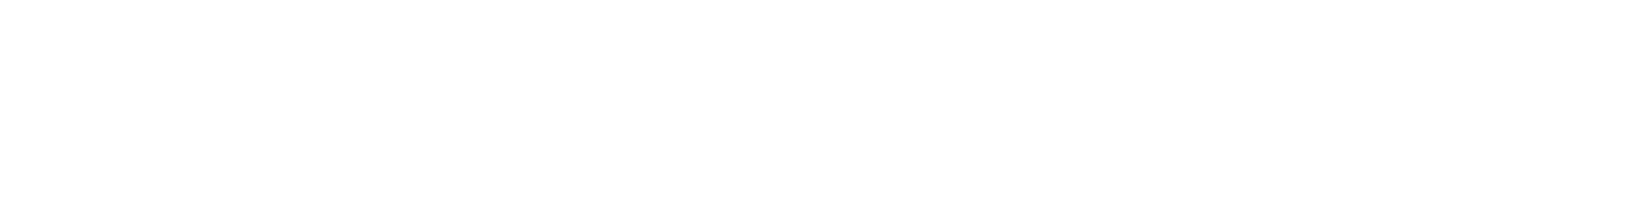

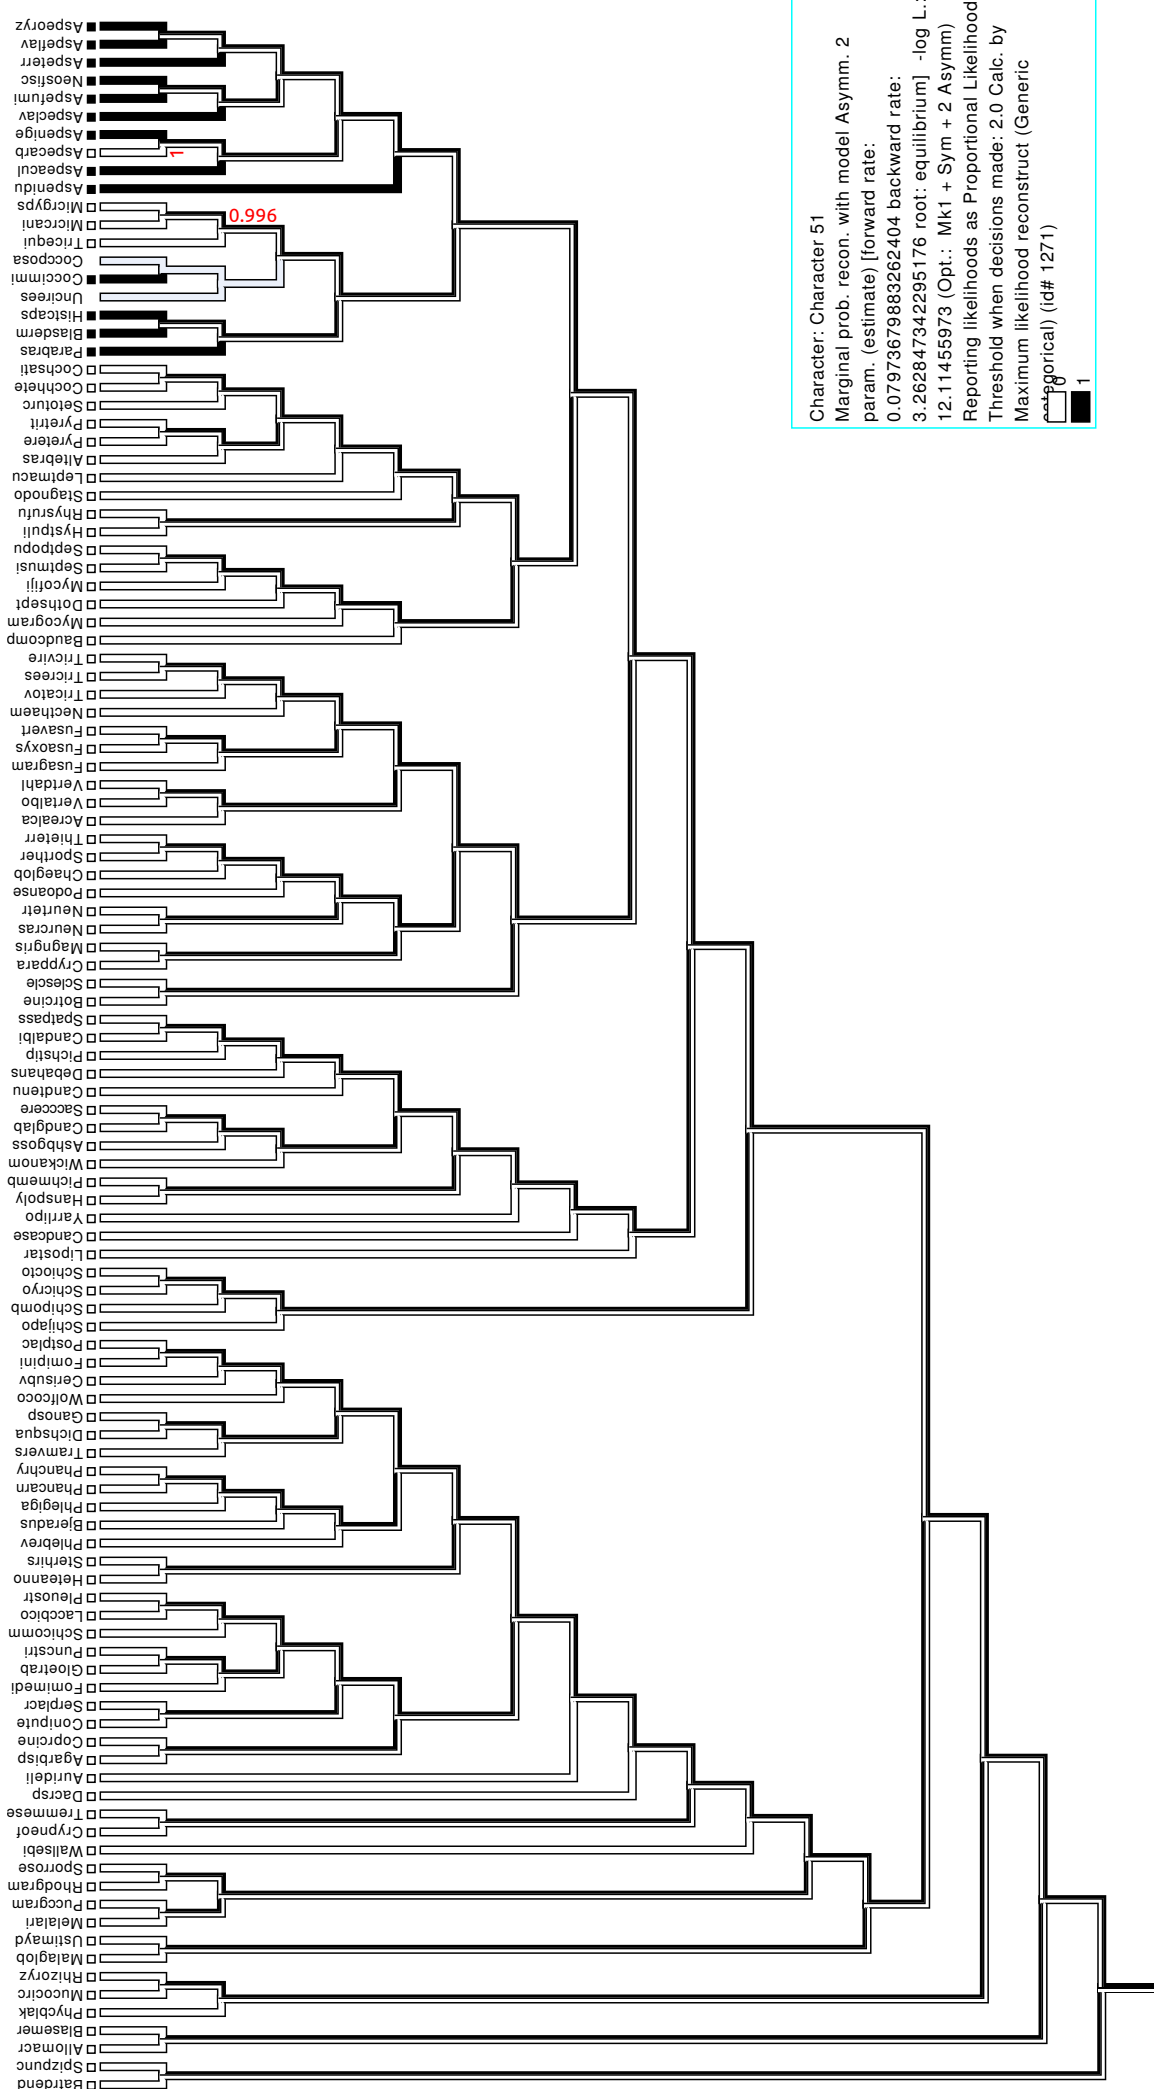

- Rattend
- Spizunc
- Allomacr
- Blasemer
- Phycblak
- Mucocitc
- Rhizoyz
- Malaglob
- Ustimayd
- Melatari
- Puccgram
- Rhodgram
- Sporose
- Wallsebl
- Cypneot
- Tremmese
- Dacrsp
- Aurideli
- Agarhisp
- Coprine
- Conipute
- Serplacr
- Fomimedl
- Gloetrab
- Punctri
- Schicom
- Laccbico
- Pleuost
- Heteanno
- Sterhirs
- Phlebrev
- Bjeradus
- Phlegiga
- Phancarn
- Phanchry
- Tamvers
- Dichsqua
- Ganosp
- Wolfcoco
- Censubv
- Fompmi
- Postplac
- Schifapo
- Schipomb
- Schicyo
- Schiocto
- Lipostar
- Candcace
- Yarrilpo
- Hanspoly
- Pchmemb
- Wikanom
- Ashbgoss
- Candglab
- Saccere
- Candtenu
- Debahans
- Pchstip
- Candabi
- Spatpass
- Botcine
- Sclescle
- Cyppara
- Magngfris
- Neuras
- Neutrtr
- Podanse
- Chaeglob
- Sporthr
- Thieterr
- Acrealca
- Vertalbo
- Veridahl
- Fusagram
- Fusoxys
- Fusavert
- Necthaem
- Tricatov
- Tricrees
- Tricvire
- Baudcomp
- Mycogram
- Dothsept
- Mycotiji
- Sepimusl
- Sepipopu
- Hyspuli
- Rhystrfu
- Stagnodo
- Lepimacu
- Aliebras
- Pyeter
- Pyetrit
- Setoturc
- Coohete
- Cochsati
- Parabras
- Blasderm
- Hiscaps
- Unctrees
- Cocctmli
- Cocoposa
- Tricqui
- Micrcani
- Micryps
- Aspendu
- Aspacul
- Aspacarb
- Aspenige
- Aspaclav
- Aspacum
- Neostisc
- Aspeterr
- Aspetlav
- Aspetoyz

Character: Character 51  
 Marginal prob. recon. with model Asymm. 2  
 param. (estimate) [forward rate:  
 0.07973679883262404 backward rate:  
 3.262847342295176 root: equilibrium] -log L:  
 12.11455973 (Opt.: Mk1 + Sym + 2 Asymm)  
 Reporting likelihoods as Proportional Likelihoods;  
 Threshold when decisions made: 2.0 Calc. by  
 Maximum likelihood reconstruct (Generic  
 Categorical) (id# 1271)

# Putative Fusion 51

September 27, 2012

## 1 Fasta Sequences

These are the unfused sequences identified by fdfBLAST belonging to the putative gene fusion in FASTA format. Accessions may be shortened, but belong to either the taxons individual genome project or NCBI's accession numbering.

```
>XP_5672951Crne_dom1
MLPRAHRLVNQRPGIALRPHASHVSSAATSAVRRSVASQAQVAQPPIHPEIDGTFNDLIG
EGTMNMGMKPRGSDRTSLPYRNINEIELADHQPVRRHSGRKWSSLGLRIEQSDLVIDESPE
VYNSASEGEYHDFGREERRSPA AVLGSKRLGMVVLPEEMQRGIQRQIDLMDNPRDIRKSY
LALPNVPTPISATKSEERRDKPFRTPEGELAKASAILPGEYGAVKNVLEELERRLGREWLT
SAKEGEILEFSSSLGSLGWLAIMDVMGGLSSRRRWQEGQDKLKYQFVHSSRHGLDLVQRI
AEVIPEESADVFNRRHVHSSSTPSLILSTFHLTSFPTLPTRQLYLRQLLELSSPYIVLIE
RSTPQGWA AISQARSYLLEKSTSENPLHV VAPCPHDGKCPLVGT KDVC GYSQRLQRPSFL
RKTKHSSRGEEEEKGYCYLVI AKGERPSVGTVAEDMKVAGRMKVGREAAEKALIKSQGRS
IIQEVEGHEAVMEVVR LHEIEPGMENYFEETS P SVNSEELEENLRKEAYS WPRMVAPPMK
RKGHV TMDTCCADGNIQRLTYTKSHSKQSYHDARKSSWGD LFPHTSKGKPVIRTRGVRRLL
>XP_5672951Crne_dom2
AKSENNGDADAVISELLSASLEEMELEKAMEAVEVDELKELEMLGIKTPRAEVSKERQD
DDMLVWKS NKNP FASGQKR SYRTL TSTRSTS QPKTPPSIQTRSMSARPAPP I RPKATLS
SLLSLAKSGTPISVLTAYDYPTALLSESCNLDMTLVGDSLSQVALGHETT TAITLDEMIH
HARTVVRGAKTPFVFADMPFGS FETSLEEGVRSVLRMVKEGGVDGVKIEGGREIVPLVRR
LSAIGIPVMPHLGLQPQRATSLSGYL VQGRTAQAAYEILQSARELANAGAF AFLLEAMPS
KVAKLVTEE VGGKGVFTIGIGAGNGTNGQVLVITDVLGIYAEDPPEDIATPNVTGETELV
STSRDFTKPLDAPRFVRQFGSLGQEMRRAVRAYVQAVKGRSFPDSKESYGMKKEEWETFL
EMVKREK DQH
```

## 2 Annotated Phylograms

All trees were generated from an initial run of Darren's Orchard pipeline against 139 taxa (Table S1), using the above corresponding un-fused sequences as BLAST seeds. The alignments were then checked for any missing taxa, manually masked and then ProtTest3 was run, please see the Methods section for detail. The final trees were generated by the following command:

```
phymml -i alignment_file -d aa -b 100 -m model -c 8 -v invariant_sites -s BEST --quiet -a gamma
```

Styling and annotation was made possible by Dendroscope and Inkscape.

## 3 Mesquite Cladogram

This tree is the 68-gene concatenated phylogeny (Fig. 1), with the presence of a fusion (black), presence of a fission (white), and absent/undetermined (grey) status of gene fusion characters plotted on to it using a "1/0/-" nexus-style data matrix. We used the program 'Mesquite' to calculate proportional likelihoods based on either an "Mk1" or "Assym. 2 param model." (see Table S4) of character change across the fungal phylogeny (Fig. 1). This allowed for a proportional likelihood of the position of the fusion/fission to be calculated.





Annotation

✓ Presence

✗ Absence

# Other Fusion

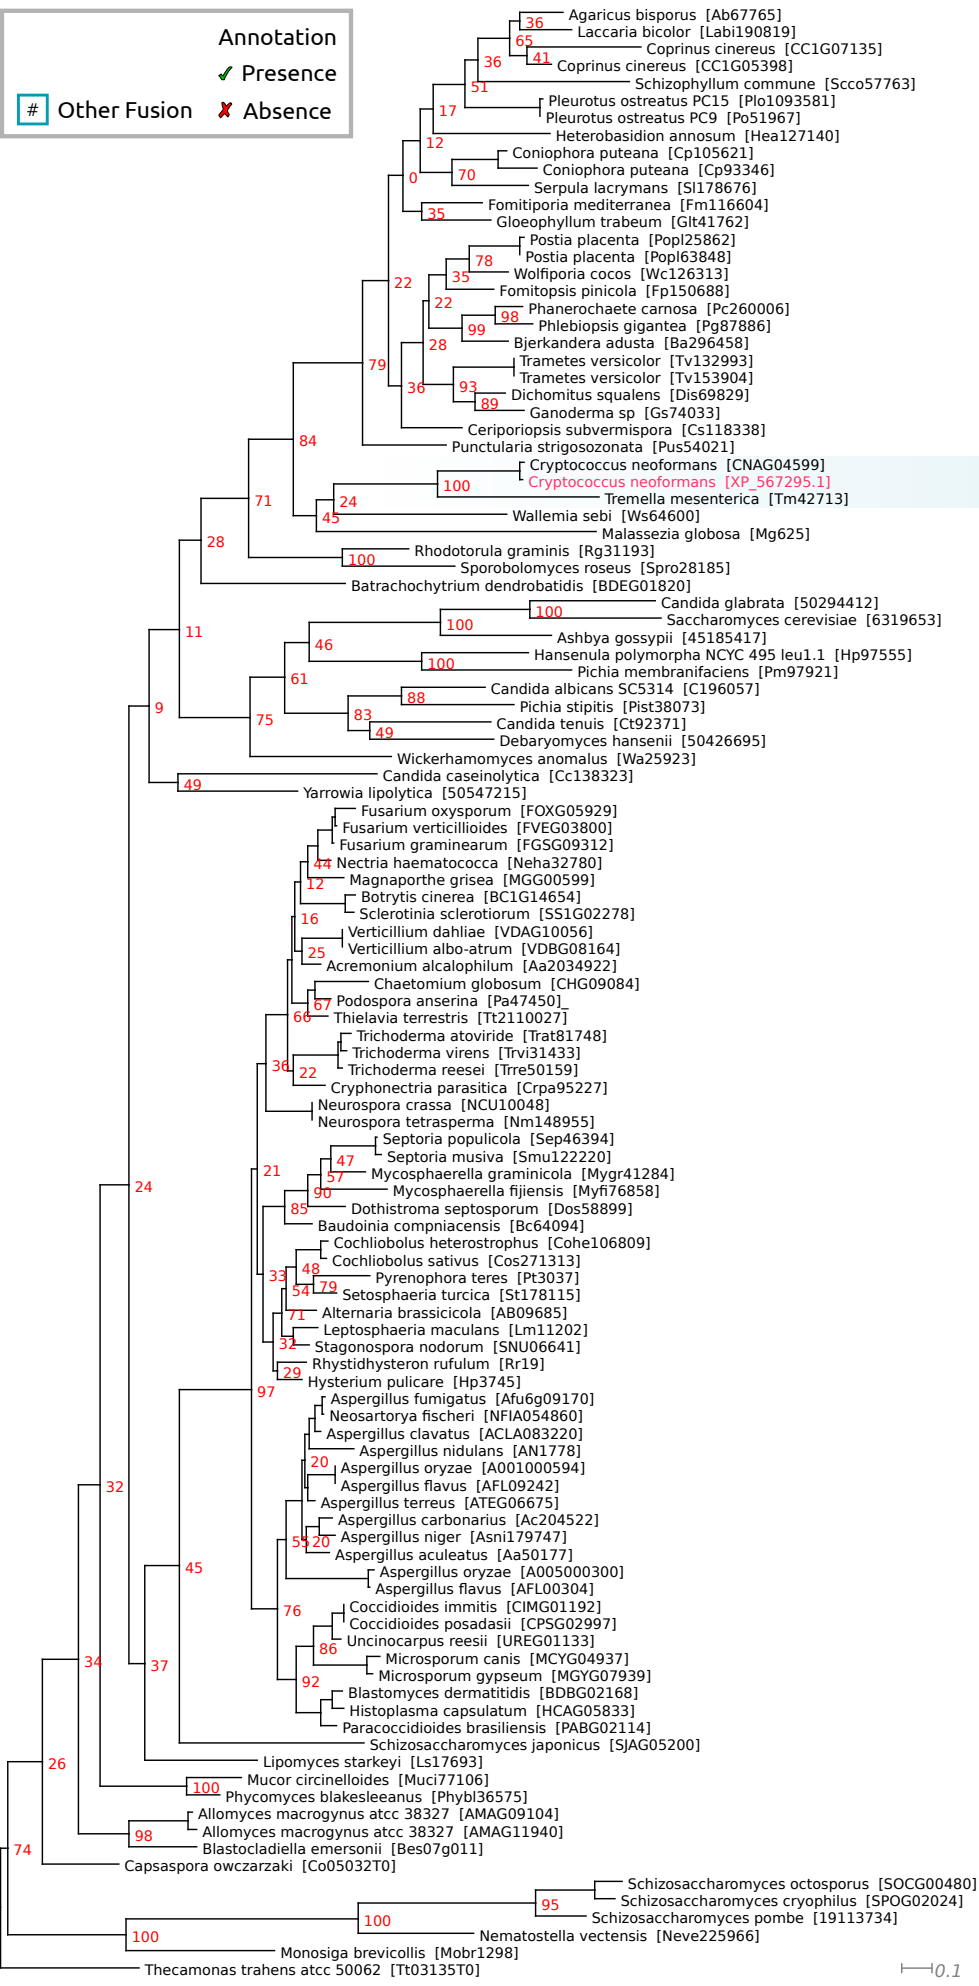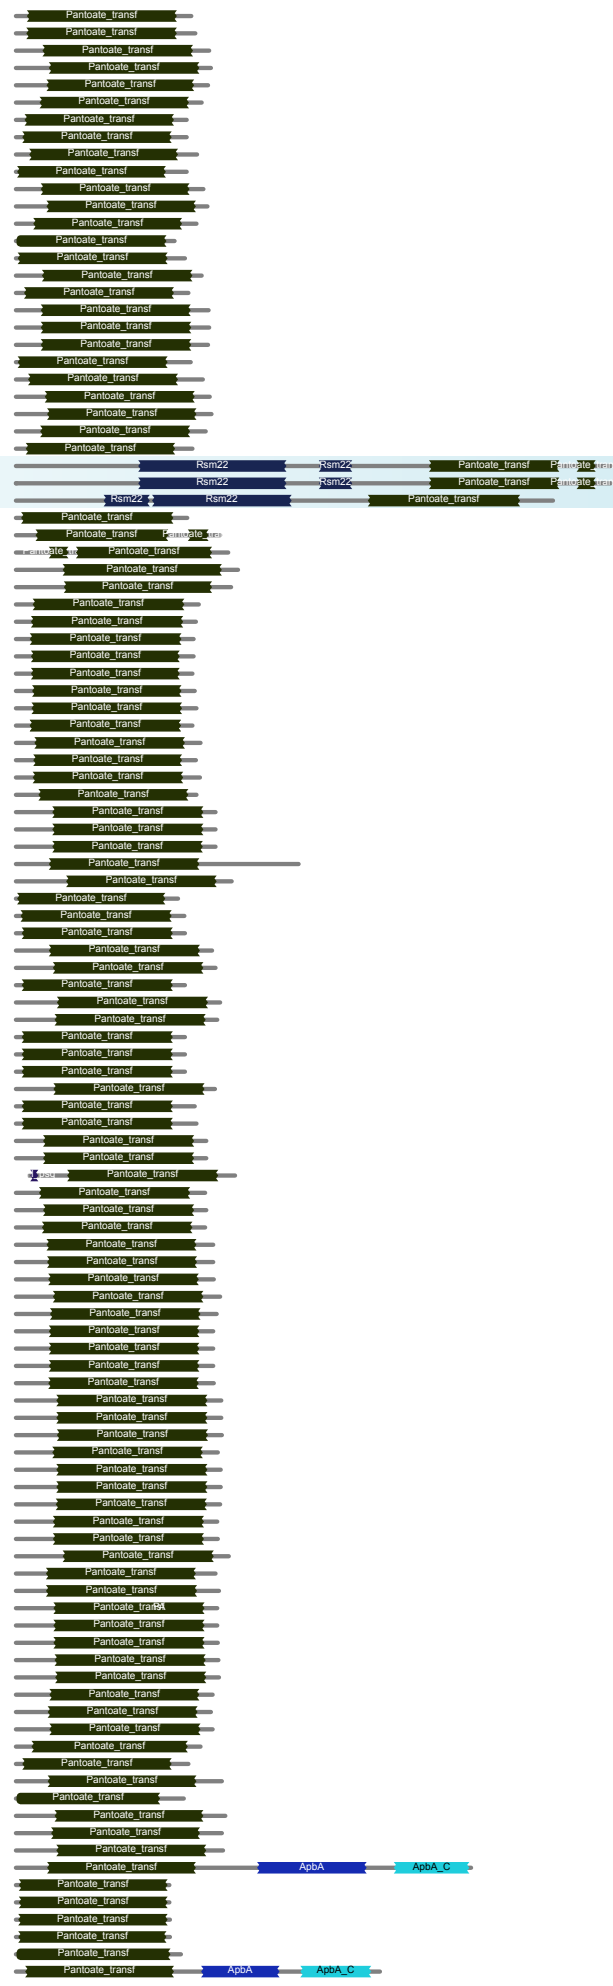

10.1



# Putative Fusion 52

September 27, 2012

## 1 Fasta Sequences

These are the unfused sequences identified by fdfBLAST belonging to the putative gene fusion in FASTA format. Accessions may be shortened, but belong to either the taxons individual genome project or NCBI's accession numbering.

```
>EEH048921A_jca_dom1
MEDDTELSQSLYSMILAPFTEARRTIISKPARRAYINTILFCLTSAALLCISIVAYWIFY
YNYVVPQISLERQVHLQFGDGHYPGTATLGTELIAAQQYDVSVILYLPRSPPNLAAGNFMV
DLALFSSAKTNTNTKIPTTEASSIESSRRPAIMTFTSPMVD TAKRVSKMPLYLLGWQREAE
GLKVNMMDRVEFGRKKGAMPKTLRLEIESEEKIQVYSAVVKF DAKFSGLRWIMYNWKIFS
ILTFTLTFWAVSMLFTSLVWVALASLAEPTVVRTNPKLKDETEEEENSSGISVKEEEGSDG
EGASSKLTMPHERQMSDEPEKIKREENTEEYTVIQTLAGSDQPEAEAGHPVGTSTSSQI
>EEH048921A_jca_dom2
TARDNSELVAQRRRGNWKIWKVKGSLIKLAIYPVQYSIVFPPAVVNDGPPSNQSSPYVH
PLVHTLESAGHVSVVLP HRQRSWIGKAHLVGATVKPTYFRPGLHKKDDGTIHHPLGAE
GENDNMEPIVNEWILIDSTPASC VQIGLFHYFKDRGPIDLVISGPNYGRNSTAVFALSSG
TLGGALEAAVCGYRSIALSYAFSSRDHPV VVIAEASRHSVRLIGHLYKNWEEDVDFYSIN
VPLEAGVSEAKILYTNVLDNRWTS GSCFEAIDAAESGEGPDLQEQLRQAGEVDAGLGKG
TKPGTGTTPGHRHMHFKWAPKFS D VYKSVDLGPPGNDGWTVKEGMTSVTRLKANFMHSP
RPLGEIQLPFKTPIFYALVE CQDSYVQPLVTQALRTRLHGIPYELIFSIRELPNPSSPLL
QYRVYEQCDFEHVLSHPATSLVNAYVIRKALIRKHYLSNSVSNVWAKHPDSILNAHVKPA
VHFELDYAEFLDEALVEAYELQESFQ ANEGKEEAKEWILKPGMSDRGRGIRLFNSESA
LREIFEGWEDDQPDSEDEGENGKV VANGNGKLNDDNRDDDHIITSQLRHFIAQPYI
HPPLLLPSESNRKFHIRTYVLA VGSGLQVYVYREMLALFAEKPYLSPWDSSGAGVDDLTRH
LTNTCLQTGRGGTAKQNSVRRFWA LEDTAVPSLSSSSPPTS GEPNASTNWKESVYQKICA
VTGEVFEEAARGMLVHFQTL PNAFEVFGVDFLVDSRGKVWLELNAFPDFRQTGDELKGD
VVGKLFEEAVVEVAVKPPFFG IEKDIERAKARAAQLGLQLVRDLDMGMKR
```

## 2 Annotated Phylograms

All trees were generated from an initial run of Darren's Orchard pipeline against 139 taxa (Table S1), using the above corresponding un-fused sequences as BLAST seeds. The alignments were then checked for any missing taxa, manually masked and then ProtTest3 was run, please see the Methods section for detail. The final trees were generated by the following command:

```
phym1 -i alignment_file -d aa -b 100 -m model -c 8 -v invariant_sites -s BEST --quiet -a gamma
```

Styling and annotation was made possible by Dendroscope and Inkscape.

## 3 Mesquite Cladogram

This tree is the 68-gene concatenated phylogeny (Fig. 1), with the presence of a fusion (black), presence of a fission (white), and absent/undetermined (grey) status of gene fusion characters plotted on to it using a "1/0/-" nexus-style data matrix. We used the program 'Mesquite' to calculate proportional likelihoods based on either an "Mk1" or "Assym. 2 param model." (see Table S4) of character change across the fungal phylogeny (Fig. 1). This allowed for a proportional likelihood of the position of the fusion/fission to be calculated.



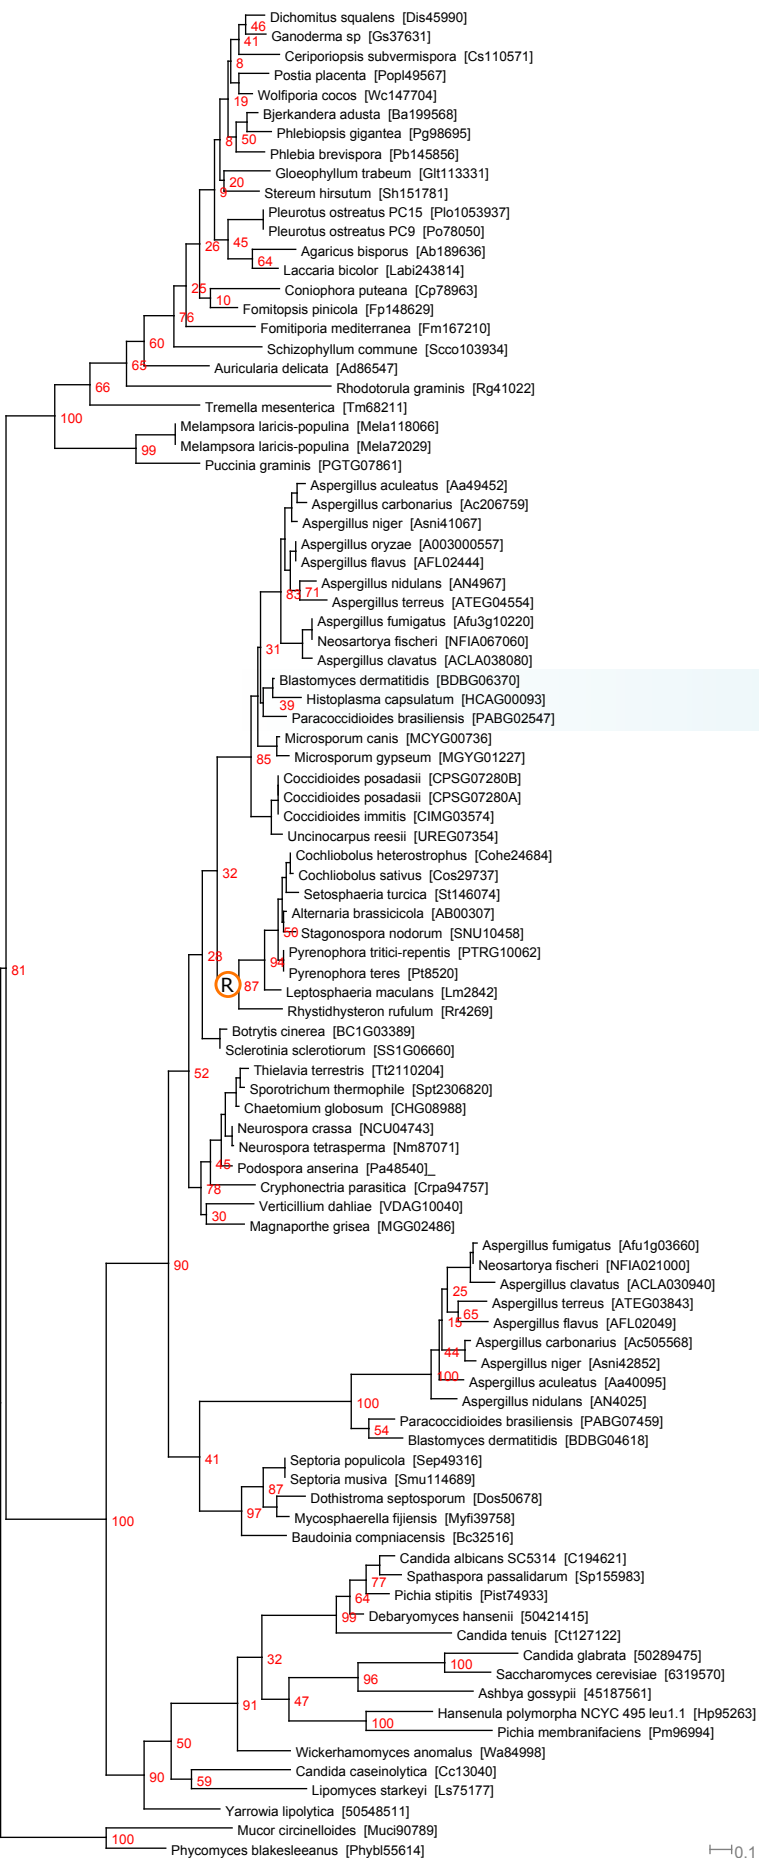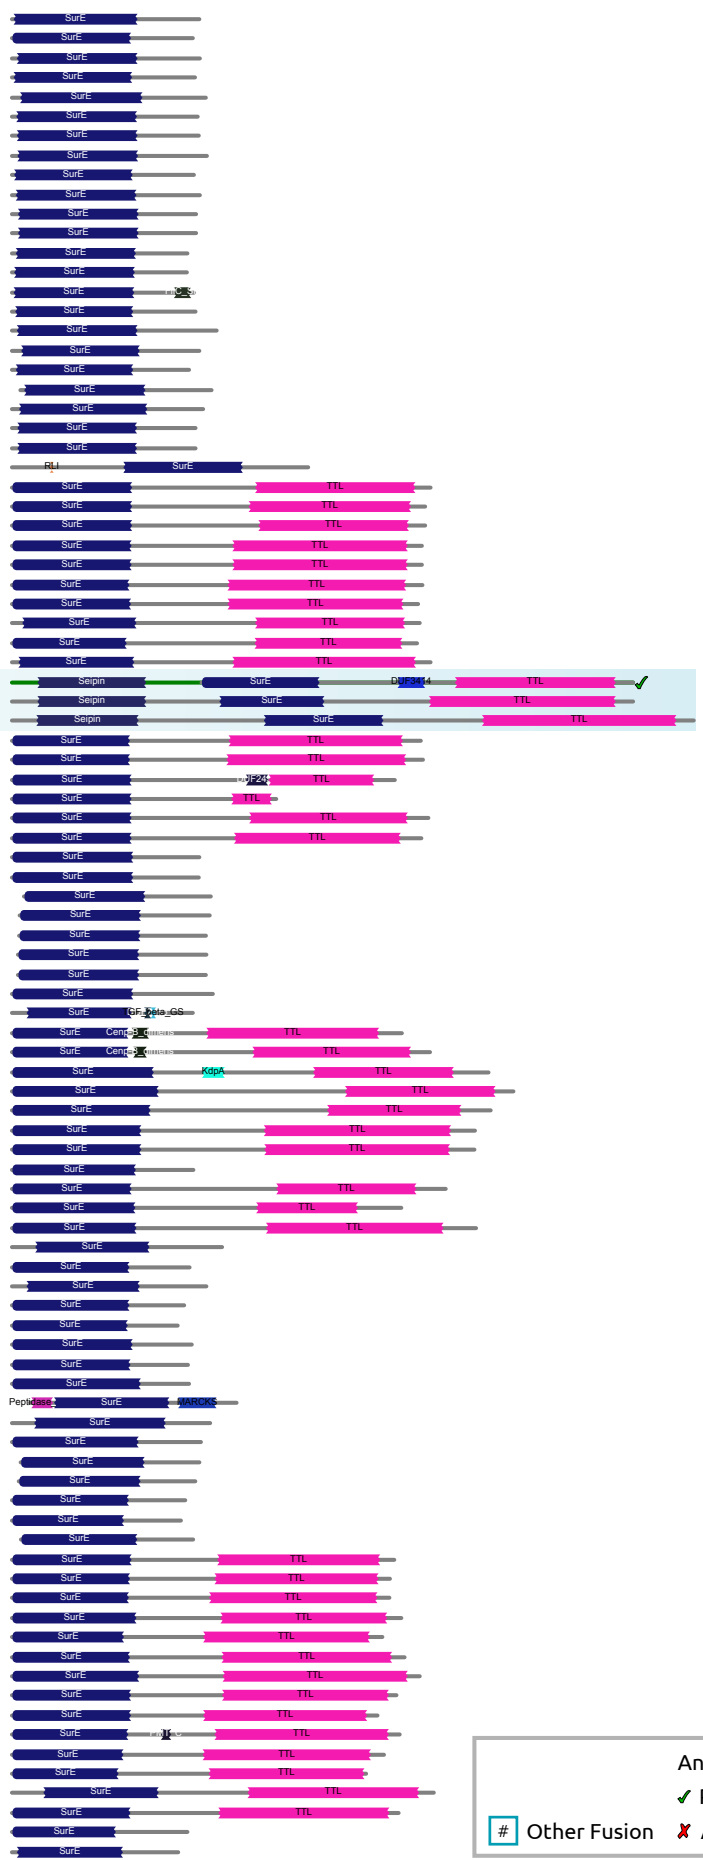

0.1

Annotation

- ✓ Presence
- # Other Fusion
- ✗ Absence





# Putative Fusion 53

September 27, 2012

## 1 Fasta Sequences

These are the unfused sequences identified by fdfBLAST belonging to the putative gene fusion in FASTA format. Accessions may be shortened, but belong to either the taxons individual genome project or NCBI's accession numbering.

```
>AE0673831The_dom1
MSSRPHPRPGHDHAPAHPSGLRNTFTVSSASSTDEPSEPSEPGSPVSHAVSVPPHRHAAG
PSRPRPTEATALLDALDLREQAHEGPCSHGTFSPRPTSPTGSSLAADLASESEGEAA
DGPSDRPGSWRKRWAAKIRSKMSATSALARRHGKHSALMYLSYYPVIAWAPEYSWSY
FKGDFVGALTVAGMYPMALSADNLAHVPPPLNGLYSFVFNPLVYALLGSCPAMVVGPEA
AGSLLVGTVVKTSVDRGRITDDDATMHARLCGIVAGMSGAMVLIAGVARLGFLDNVLSRP
FLRGFISAIGVVAVDQLVPELGLSGLADRAHLGHASSVDKLAIFRHLQVHTLTLAVA
ATSFAVIMVCREVKRRLQPRYPVAVYVPDRFIVVVLSAFLAYWYQWDRAGVAVLGKVEAA
SGHPFTFRWPLQPANLPHMRDAMSTSFLLIALLGFFESSVAAKSLGPDGFAGIQLSPNREL
VALGTANIVGACFMSLPAFGGYGRSKVNKATGGRTPVASILLSGLTLLCILVLLPYFYLL
PKPVLSSLISVVAWSLIECPHDVSFFVRIRAWQELGLMTVIVLATIFFSLSFGMAIGVG
LSVLQVIRHATRPRIQILGRIPGTNRNFENAEANLDRLEFIEGCLIVKIPEPLTFANTGEL
KARLRRLELYGTGLAHPALPRLRREDNRNIIFDIHGVTSLDGGSTQVLEEIVRDYRQRG
VRIFFSRGPGRDSPFGRLRRSGIIVDLAGEHHFVDDVHEALKLTEAEEARLGAADGQSG
>AE0673831The_dom2
LPPCGRHRCEGRRRQDTIQTITVVWPSRYLSDSRVSWQTLTNGRRQNGKAEQAATTKQTVRP
APDPARTTTQPHHHPILMSLSTVSRERILGALLGVHAGDALGATVEFAAWEDVQANYPD
GVRDIVGGGPFPGWPPGHATDDTDLTRAVLLAYRDAALNPPPLPPSAPPYVVARAAAHMV
DWYEGRWPGRTPGQQPRDVGLATVIGITKFKKTGDPRTSGAGEALLGNGSLMRCIPTALF
QPDAERFAETIDISAITHDDFHCTIACAAYNAVVRALVDGTSPEGAFQAGKDAVERAAA
VAAAAPTANRQVKMARAAQKVGAAMDAGKSLIRVRDLAENGPKGAAANASKALLNKASGYV
LESLLAVAALFDRPREEVLIDVVRFGQDADTNGAIIAGLLGARDGVDAIPARWREKLQ
FEKEFTEVADGLLARQDSGN
```

## 2 Annotated Phylograms

All trees were generated from an initial run of Darren's Orchard pipeline against 139 taxa (Table S1), using the above corresponding un-fused sequences as BLAST seeds. The alignments were then checked for any missing taxa, manually masked and then ProtTest3 was run, please see the Methods section for detail. The final trees were generated by the following command:

```
phym1 -i alignment_file -d aa -b 100 -m model -c 8 -v invariant_sites -s BEST --quiet -a gamma
```

Styling and annotation was made possible by Dendroscope and Inkscape.

## 3 Mesquite Cladogram

This tree is the 68-gene concatenated phylogeny (Fig. 1), with the presence of a fusion (black), presence of a fission (white), and absent/undetermined (grey) status of gene fusion characters plotted on to it using a "1/0/-" nexus-style data matrix. We used the program 'Mesquite' to calculate proportional likelihoods based on either an "Mk1" or "Assym. 2 param model." (see Table S4) of character change across the fungal phylogeny (Fig. 1). This allowed for a proportional likelihood of the position of the fusion/fission to be calculated.



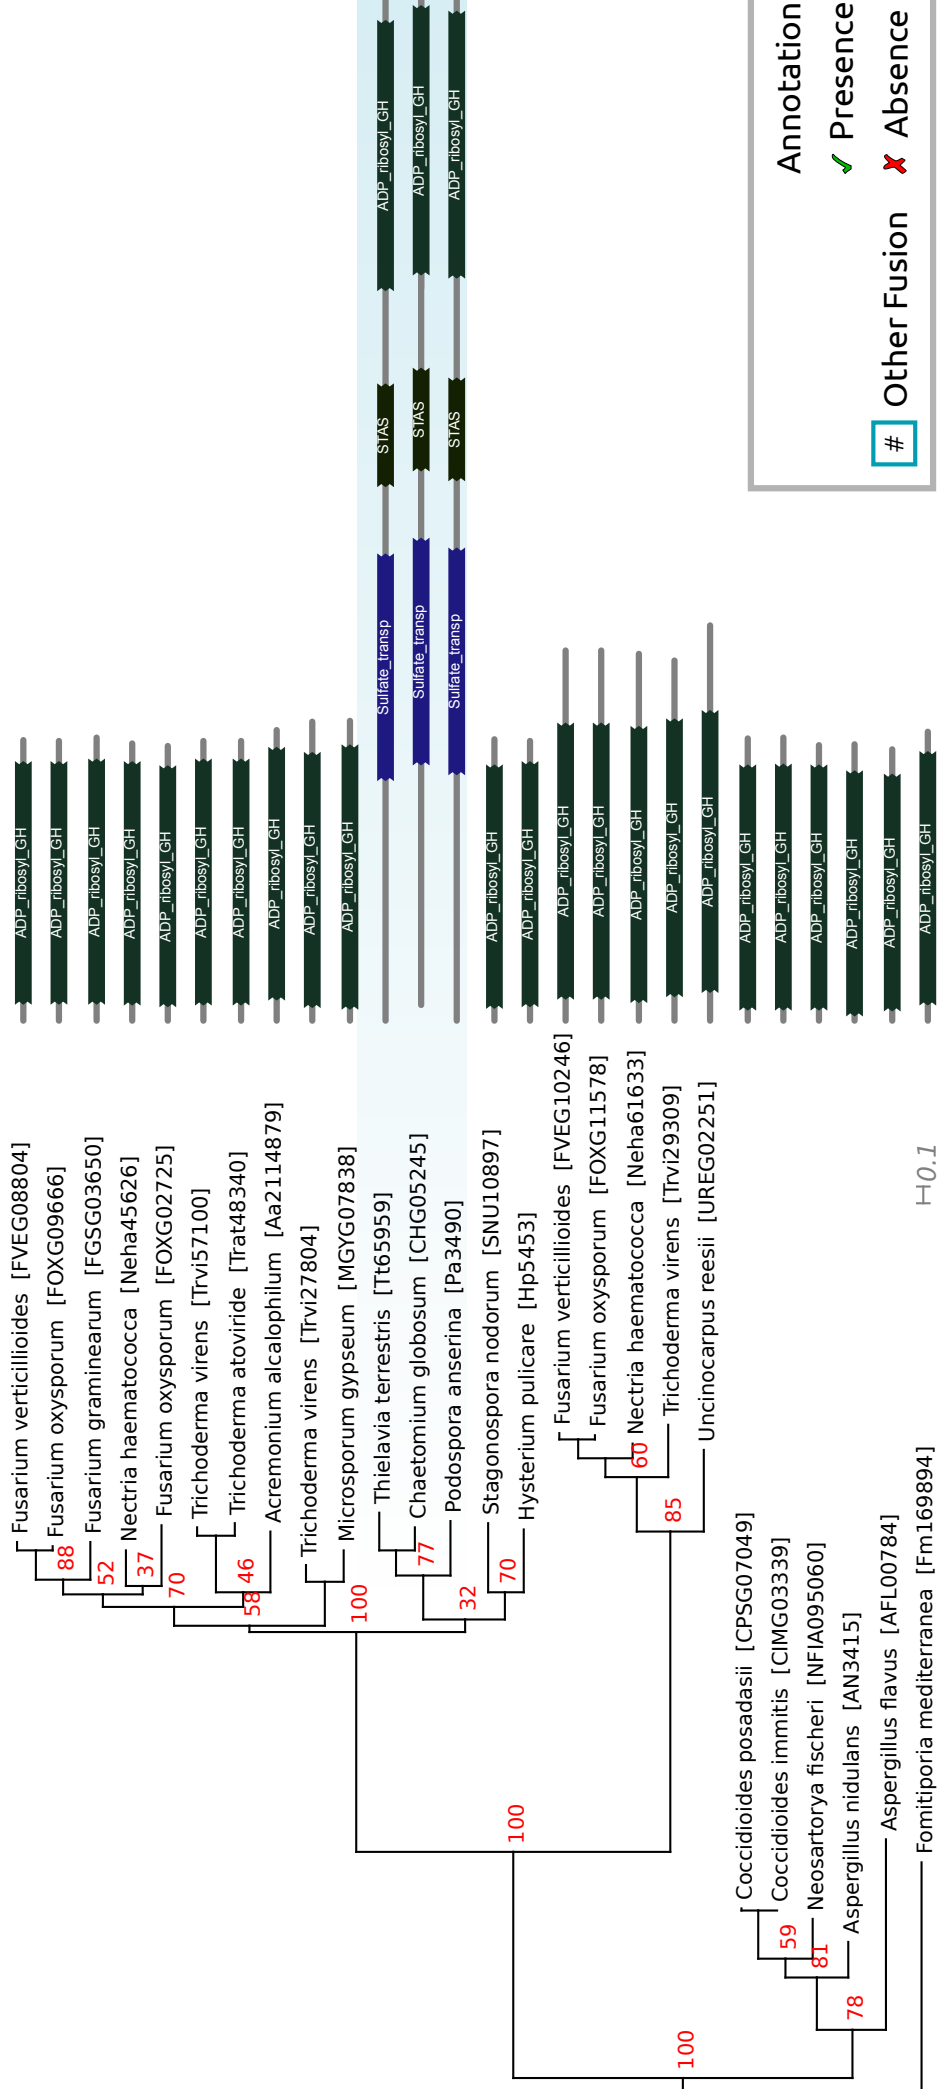

| Annotation   | Presence | Absence |
|--------------|----------|---------|
| #            | ✓        | ✗       |
| Other Fusion |          |         |



# Putative Fusion 54

September 27, 2012

## 1 Fasta Sequences

These are the unfused sequences identified by fdfBLAST belonging to the putative gene fusion in FASTA format. Accessions may be shortened, but belong to either the taxons individual genome project or NCBI's accession numbering.

```
>EHA275671Asni_dom1
MPSALTFDLHAKCSTTKARASTLRLPHGDVPLPIFMPVATQASLKGLTYDQLRQTGCQLC
LNNTYHLGLKPGQAVLDAVGGAHKLQGWDRNILTDSGGFQMVSLKLATVTEEGVRFSLP
HDGTPMLLTPEHSISLQNSIGSDIIMQLDDVIATTSPDQARIHEAMERSVRWLDRCIDAH
KYPERRQLFCIIQGGLDLEMRKQCCEEMVARDTPGIAIGGLSGGEAKEDFCKERVDTCTG
LLPEKKPRYVMGVYPEDLIMGVALGADMFDVWPTRTAESTPQSTTTTTTTTTTPQEPHPD
PTHEEHQYLNLI
>EHA275671Asni_dom2
PTHEEHQYLNLIIRRILSEGEHRPDRTGTGTRSIFAPPQMRFSLSKPSTNTTTGIKEYTPI
LPLLTTKRVLRAVLAELLWFISGTTSSLPLSEAGIKIWDGNGSREYLDKVGLSHREVDG
LGPVYGFQWRHFGAEYVDAKTDYSGQGVVDQLAEVVKKLKENPFDRRIIMSAWNPKDMRIM
ALPPCHMFAQFYVRFDAKRDEEGVVRDGEWGRGHLDCLLYQRSADMGLGVPFNIASYAL
LTHLLAHAVDMVPGTLVHTLGDHVVLDHVDALKEQIEREPVAFPEVRIKREDRGSGVVD
GWKEEEFEVIGYKPKHKAIKMKMSV
```

## 2 Annotated Phylograms

All trees were generated from an initial run of Darren's Orchard pipeline against 139 taxa (Table S1), using the above corresponding un-fused sequences as BLAST seeds. The alignments were then checked for any missing taxa, manually masked and then ProtTest3 was run, please see the Methods section for detail. The final trees were generated by the following command:

```
phym1 -i alignment_file -d aa -b 100 -m model -c 8 -v invariant_sites -s BEST --quiet -a gamma
```

Styling and annotation was made possible by Dendroscope and Inkscape.

## 3 Mesquite Cladogram

This tree is the 68-gene concatenated phylogeny (Fig. 1), with the presence of a fusion (black), presence of a fission (white), and absent/undetermined (grey) status of gene fusion characters plotted on to it using a "1/0/-" nexus-style data matrix. We used the program 'Mesquite' to calculate proportional likelihoods based on either an "Mk1" or "Assym. 2 param model." (see Table S4) of character change across the fungal phylogeny (Fig. 1). This allowed for a proportional likelihood of the position of the fusion/fission to be calculated.

**Annotation**

✓ Presence

✗ Absence

# Other Fusion

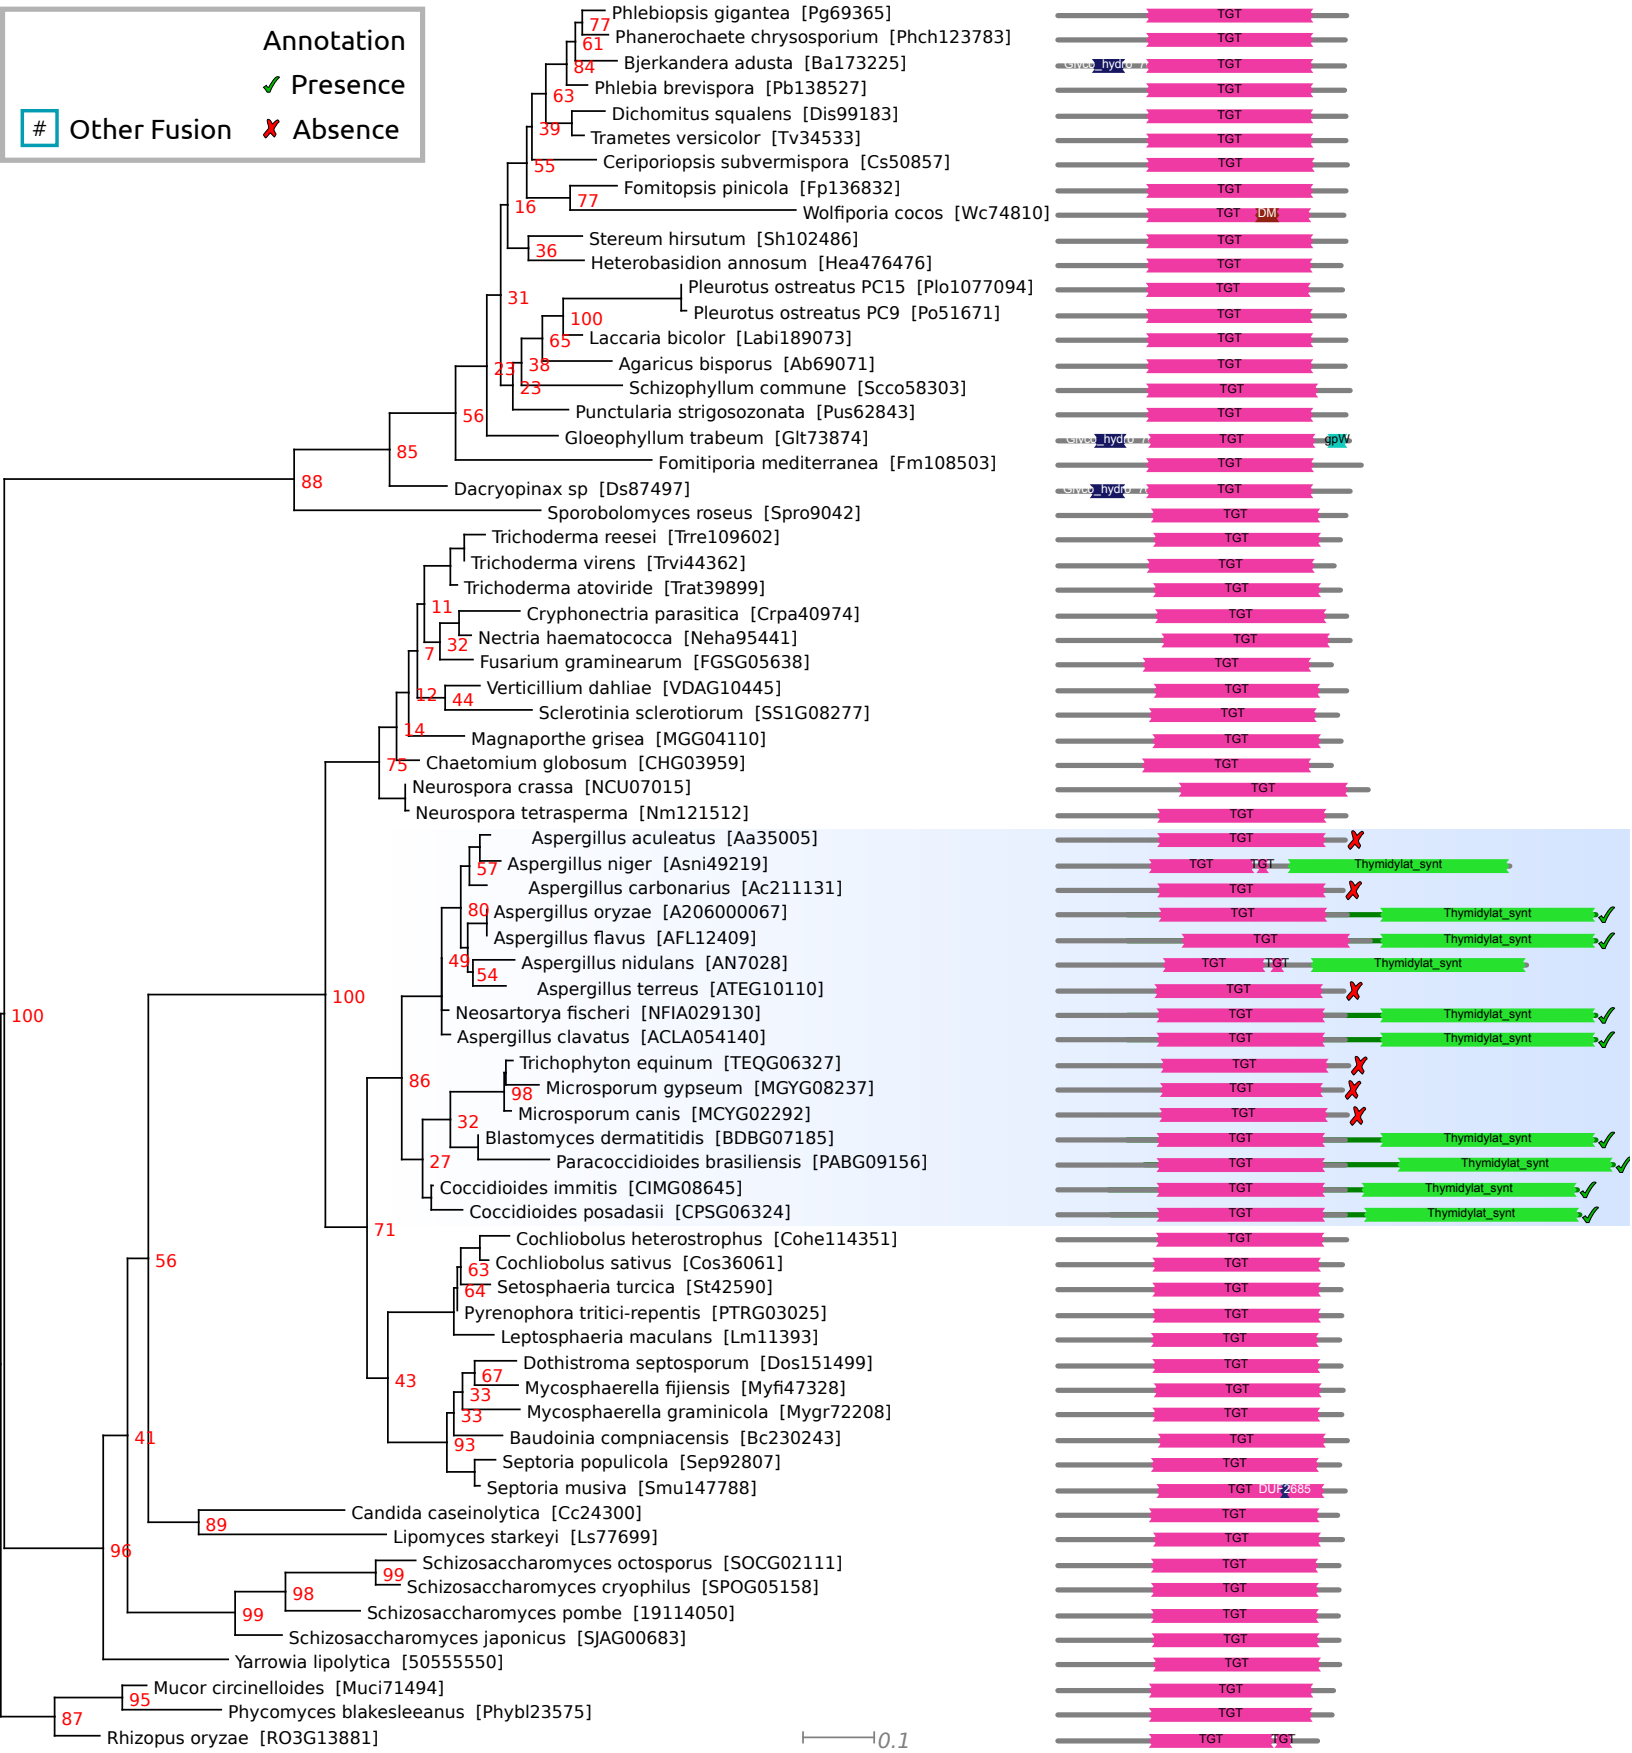

Annotation

✓ Presence

✗ Absence

# Other Fusion

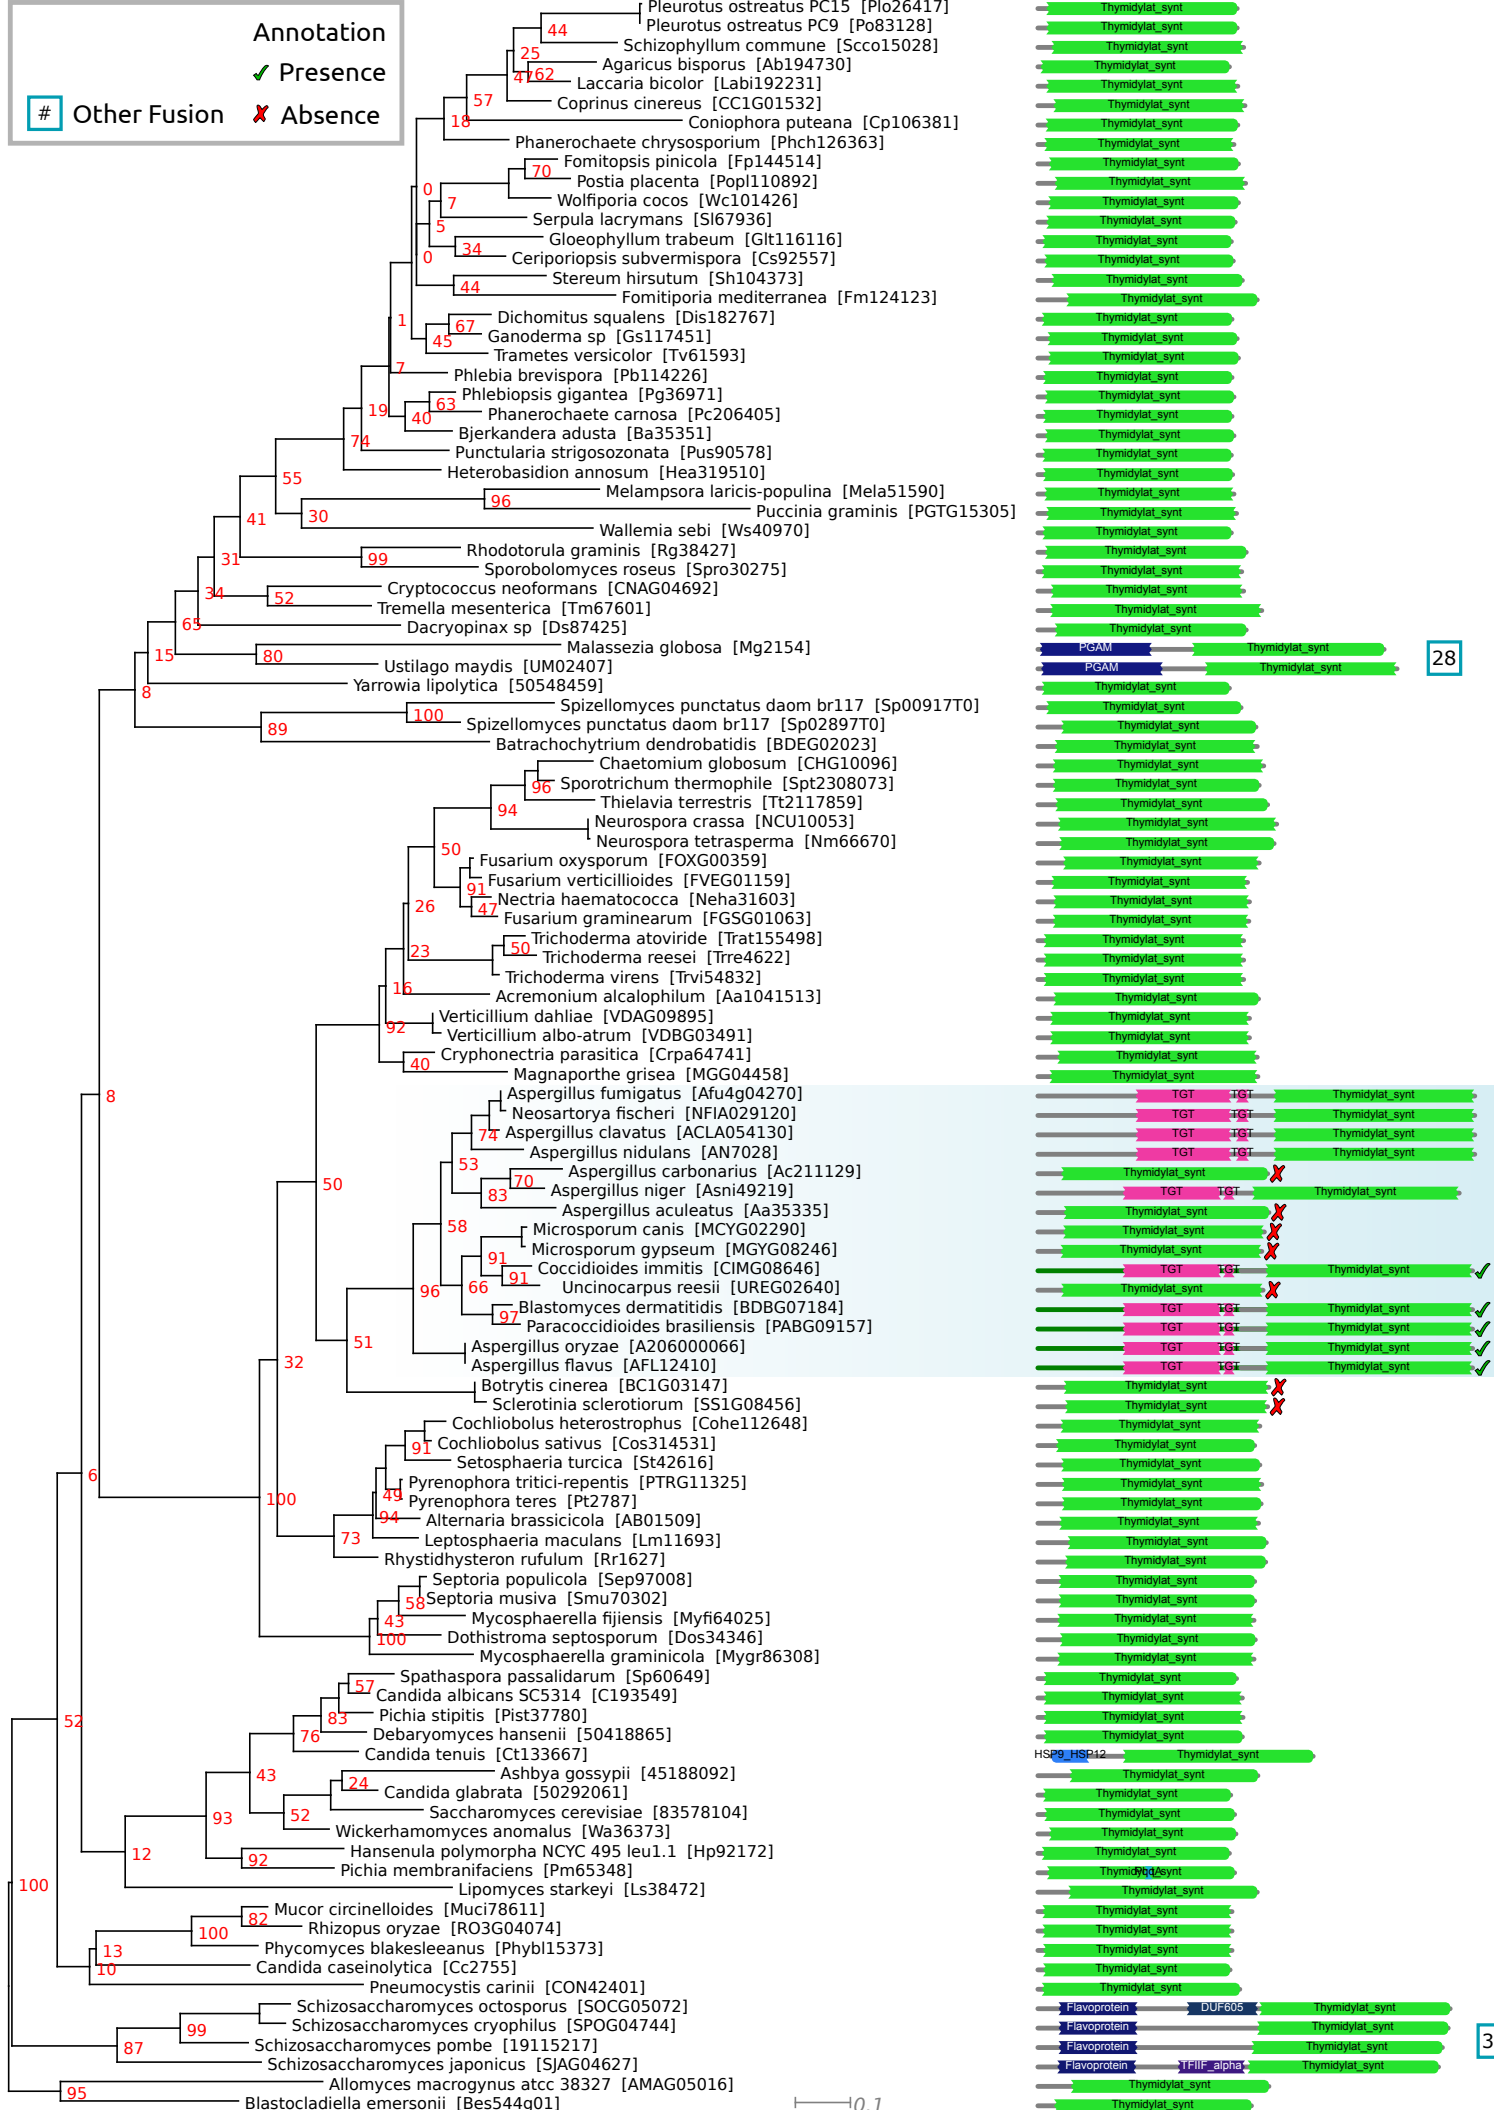

28

30

0.1



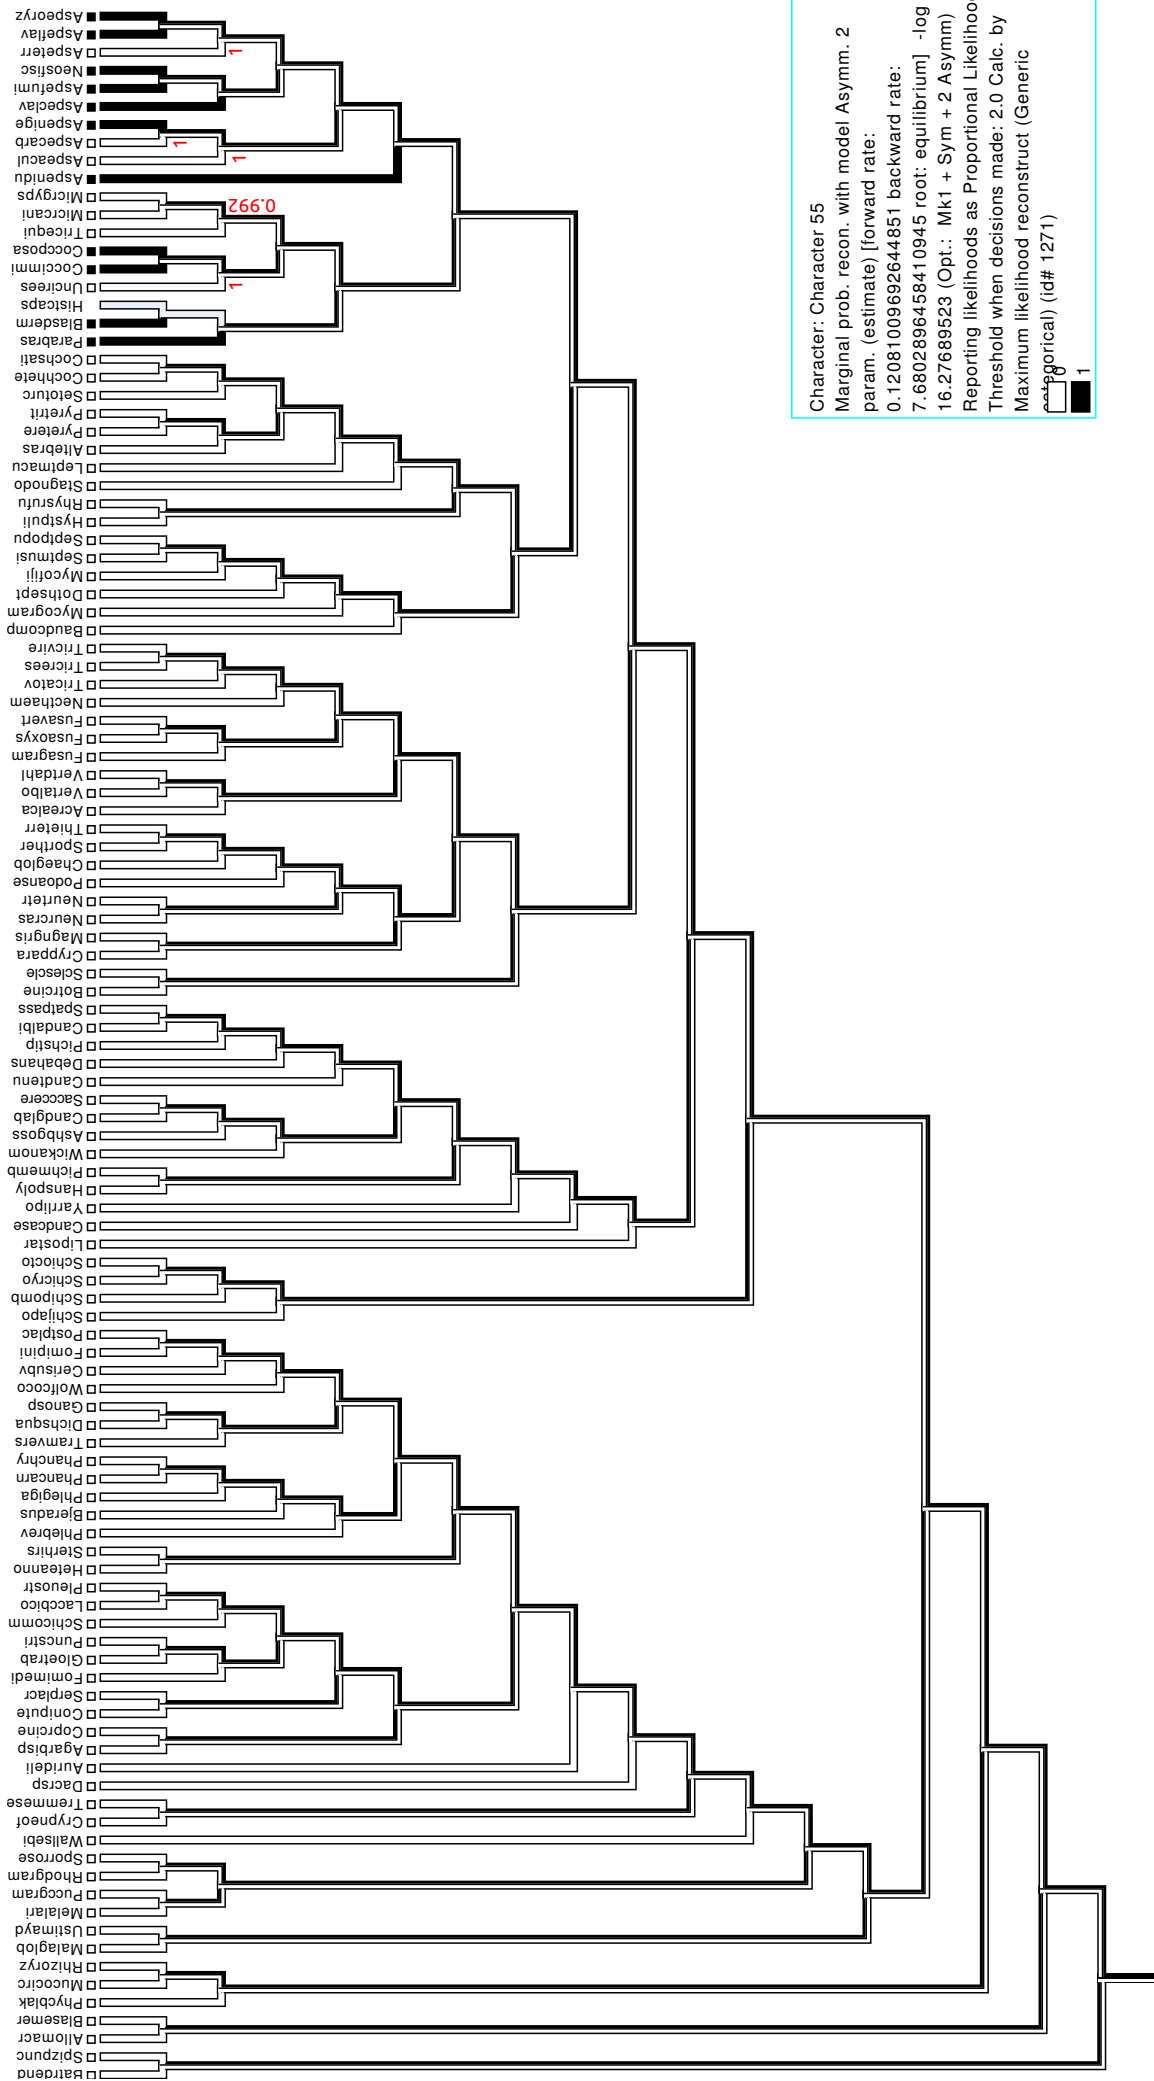

- Rattand
- Spzunc
- Allomacr
- Blasemer
- Phycblak
- Mucocitc
- Rhizoyz
- Malaglob
- Ustimayd
- Melatari
- Puccgram
- Rhodgram
- Sporose
- Wallsebl
- Cypneot
- Tremmese
- Dacrsp
- Auridelii
- Agarhispp
- Coprine
- Conipute
- Serplacr
- Fomimedl
- Gloetrab
- Punctri
- Schicom
- Laccbico
- Pleuost
- Heteanno
- Sterhirs
- Phlebrev
- Bjeradus
- Phlegiga
- Phancarn
- Phanchry
- Tamvers
- Dichsqua
- Ganosp
- Wolffcoco
- Cersubv
- Fompmni
- Postplac
- Schiflapp
- Schipomb
- Schichyo
- Schiocto
- Lipostar
- Candcasse
- Yarrilpo
- Hanspoly
- Pichmemb
- Wikanom
- Ashbgoss
- Candglab
- Saccere
- Candtemu
- Debahans
- Pichstip
- Candalbi
- Spatpass
- Botcine
- Sclescle
- Cyppara
- Magngfris
- Neuras
- Neutrtr
- Podanse
- Chaeglob
- Sporthr
- Thieterr
- Acrealca
- Verlabo
- Verdahl
- Fusagram
- Fusoxys
- Fusavert
- Necthaem
- Tricatov
- Tricrees
- Tricvire
- Baudcomp
- Mycogram
- Dothsept
- Mycotiji
- Sepimusl
- Sepipou
- Hyspuli
- Rhystrfu
- Stagnodo
- Lepimacu
- Aliebras
- Pyeter
- Pyetrit
- Setoturc
- Coohete
- Cochsati
- Parabras
- Blasderm
- Hiscaps
- Unctrees
- Cocctmli
- Coccposa
- Tricqui
- Micrcant
- Micryps
- Aspndu
- Aspcaul
- Aspcarb
- Aspenge
- Aspclav
- Aspctum
- Neostisc
- Aspeter
- Aspellav
- Aspeoyz

# Putative Fusion 55

September 27, 2012

## 1 Fasta Sequences

These are the unfused sequences identified by fdfBLAST belonging to the putative gene fusion in FASTA format. Accessions may be shortened, but belong to either the taxons individual genome project or NCBI's accession numbering.

```
>XP_0033016801Pyte_dom1
MVLALHVWGPAFGLPSIEPECIATIAYCQRVIPRGQWTLVAEHDPTVGVTESLPILFDDD
VATASGFEDIVAYLRNYPAITNDLDASLSSRQRTDRTAFITFLQSTATPLIDLSTLYVSAE
NYNTTSSAYTAILPWYANYTVPPKRRQLARTRTAHMGLSSLDMDTTAEDGFAPGRGTAS
SEYEAAKRAAGIPTESKANTSLNIGRSKGLTGLLGGQMYAARFKLDALSADLLDPLSDLL
GRHDYLLHGEQPSSLDCLAFGYLSLLIYPPVPQAWLRETIKMKYPRIGAYIHKLHGDLFR
>XP_0033016801Pyte_dom2
NDEVNSAEVWSISSSAKTPRTTLLPVARSETFASKALASAKEIAGSIPGISKFSRGST
VVAVSKRSKSELPSLLVNSFSRAPTASQIQSPPPASSTKSGRFFGKANIGHTFRHKSA
GAFGPD LAKKLSQLVKMEKNVMRSMELVSRERMEVAQQLSIWGEACDDVDVTDKLGVL
IYEIGELEDQYVDRYDQYRVTIKSIRNIEASVQPSRDRKQKITDQIAQLKYKEPNSPKIV
VLEQELVRAEAESLVAEAQLSNITREKLKAAFNYQFDAMREHCEKLAIAGYGKHLLELV
DDTPVTPGETRQAYDGYEASKAIIQDCEDALTNVWSQNASVSAKLSQRSRTLSQRRNRN
HSEGVDSLGGDQALDRESGLWIPASEHHGNGYEGEELDDDINSTIASEHQRGREDERIVA
A
```

## 2 Annotated Phylograms

All trees were generated from an initial run of Darren's Orchard pipeline against 139 taxa (Table S1), using the above corresponding un-fused sequences as BLAST seeds. The alignments were then checked for any missing taxa, manually masked and then ProtTest3 was run, please see the Methods section for detail. The final trees were generated by the following command:

```
phymml -i alignment_file -d aa -b 100 -m model -c 8 -v invariant_sites -s BEST --quiet -a gamma
```

Styling and annotation was made possible by Dendroscope and Inkscape.

## 3 Mesquite Cladogram

This tree is the 68-gene concatenated phylogeny (Fig. 1), with the presence of a fusion (black), presence of a fission (white), and absent/undetermined (grey) status of gene fusion characters plotted on to it using a "1/0/-" nexus-style data matrix. We used the program 'Mesquite' to calculate proportional likelihoods based on either an "Mk1" or "Assym. 2 param model." (see Table S4) of character change across the fungal phylogeny (Fig. 1). This allowed for a proportional likelihood of the position of the fusion/fission to be calculated.



Annotation

✓ Presence

✗ Absence

# Other Fusion

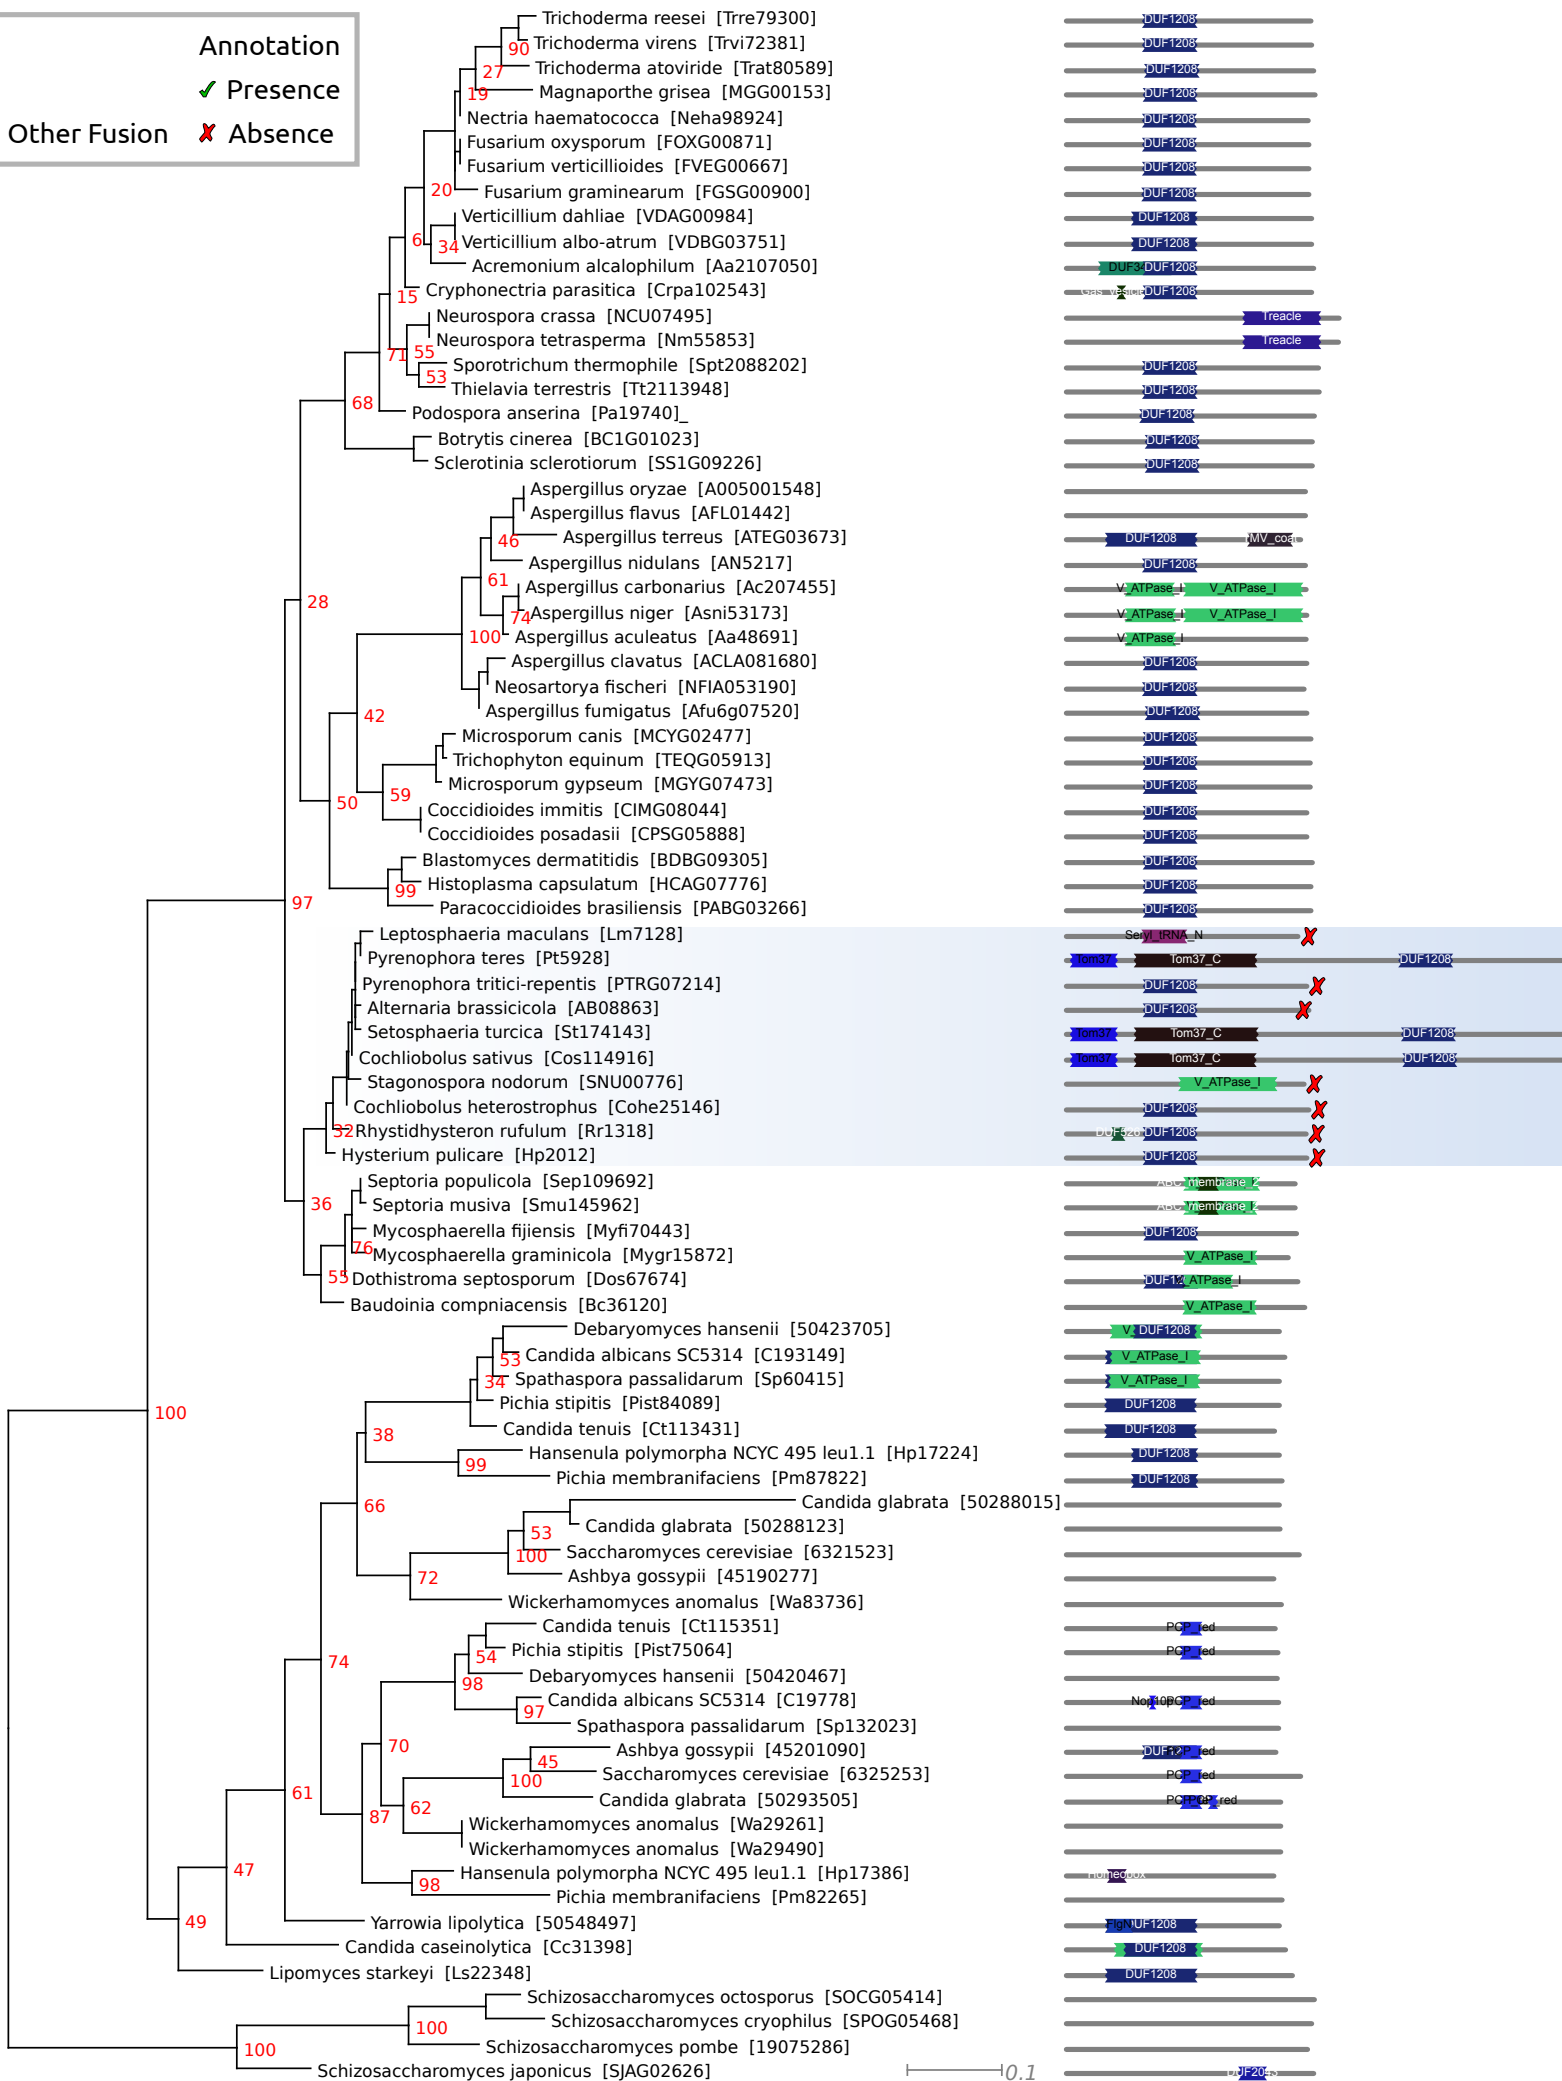



# Putative Fusion 56

September 27, 2012

## 1 Fasta Sequences

These are the unfused sequences identified by fdfBLAST belonging to the putative gene fusion in FASTA format. Accessions may be shortened, but belong to either the taxons individual genome project or NCBI's accession numbering.

```
>XP_0029112401Coci_dom1
MDADLEKHIIEMARSQPAPVAGPRELSQEEIDAKLKALDDIPLFMKSLPDESSENVLAA
LQDLAYEGTPDEIADNFKSRGNEYFKGKKYREAI SFY TQ GIEAKPTDPKIMTALLCNRAA
CNLELQNYGSVLRDCSSALNLDAHLSKAYYRSAQALLALDRLEEGLDCCDRKEAKEKVR
EREERLRKEQEAKRALAMAFRERNLIDVPKPDGSSNPYEP RWD PEDPTNSTLVFPVFFLY
PQYATSDVIPDFVEDTIFGAHLERMFP PAGT APEW DKKGEYTVPSLVVYAMTRRKR LFKV
>XP_0029112401Coci_dom2
GKKMTLKDVFKAAPKEGEPKDGLEVKDGC LTFV VVPKGDAEKKWVDEFKR SRDQISTES
SKRYNQKANLDQQKHTAVRRDQKGLSTANMSVTNKILRTANAPNTPPDEIETQVAQALID
LENNVPELKSELRLVQISAAREVDVRGGKKAIVIFVVPVQLKAFHKVQQLRTRELEKKFS
DRHVVFIAQRRMLRKPTRTSRVKQKRPRSRTLTSVHEKILEDLVFPTEIVGKRTRVAVDG
SKLLKVFLDSKDATSLEYKLSFSSVYRRLTGKDVVFEFPVVHGDKA
```

## 2 Annotated Phylograms

All trees were generated from an initial run of Darren's Orchard pipeline against 139 taxa (Table S1), using the above corresponding un-fused sequences as BLAST seeds. The alignments were then checked for any missing taxa, manually masked and then ProtTest3 was run, please see the Methods section for detail. The final trees were generated by the following command:

```
phym1 -i alignment_file -d aa -b 100 -m model -c 8 -v invariant_sites -s BEST --quiet -a gamma
```

Styling and annotation was made possible by Dendroscope and Inkscape.

## 3 Mesquite Cladogram

This tree is the 68-gene concatenated phylogeny (Fig. 1), with the presence of a fusion (black), presence of a fission (white), and absent/undetermined (grey) status of gene fusion characters plotted on to it using a "1/0/-" nexus-style data matrix. We used the program 'Mesquite' to calculate proportional likelihoods based on either an "Mk1" or "Assym. 2 param model." (see Table S4) of character change across the fungal phylogeny (Fig. 1). This allowed for a proportional likelihood of the position of the fusion/fission to be calculated.

Annotation

✓ Presence

✗ Absence

# Other Fusion

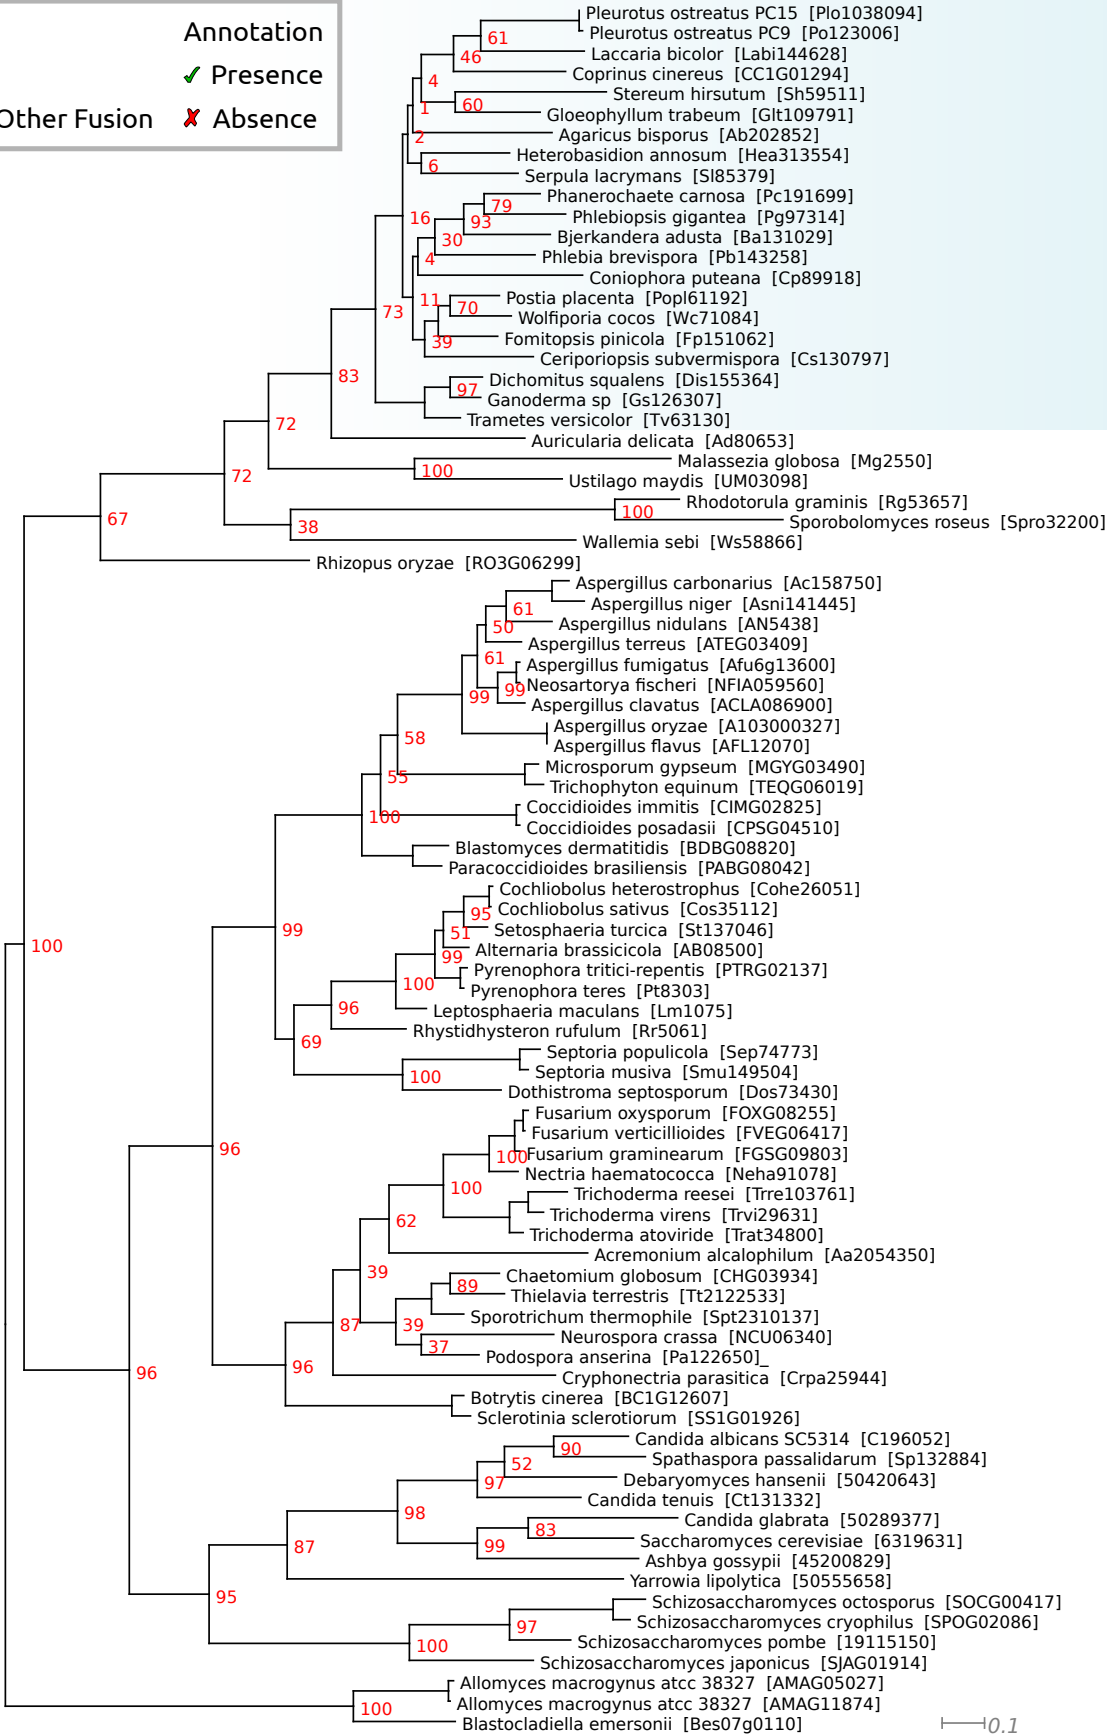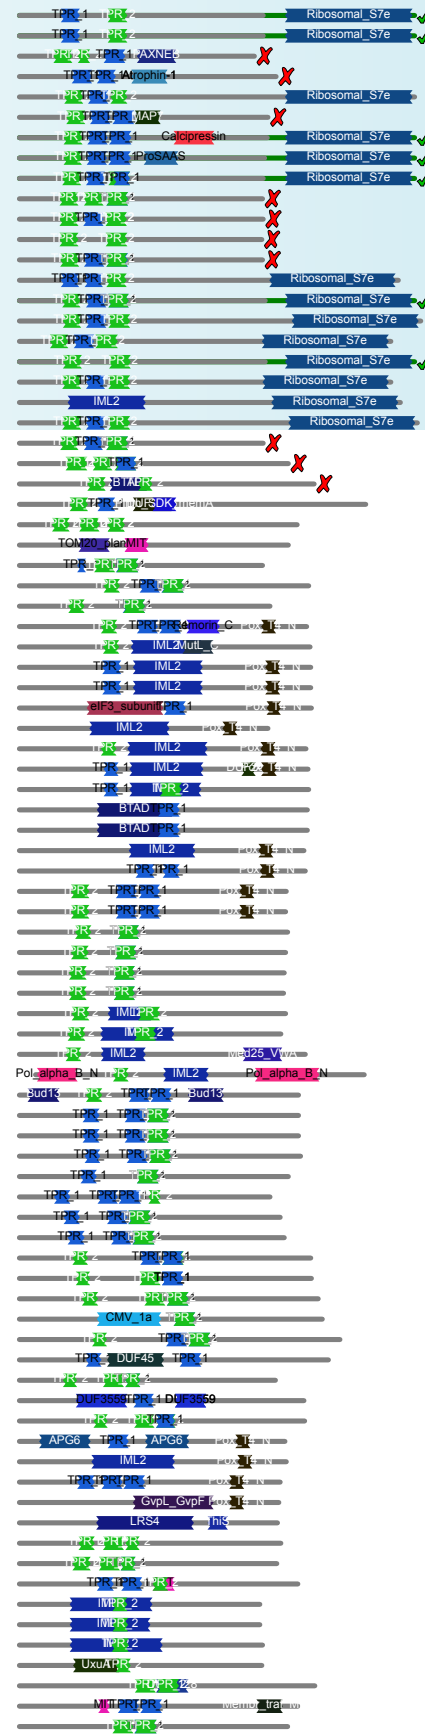



Annotation

✓ Presence

# Other Fusion

✗ Absence

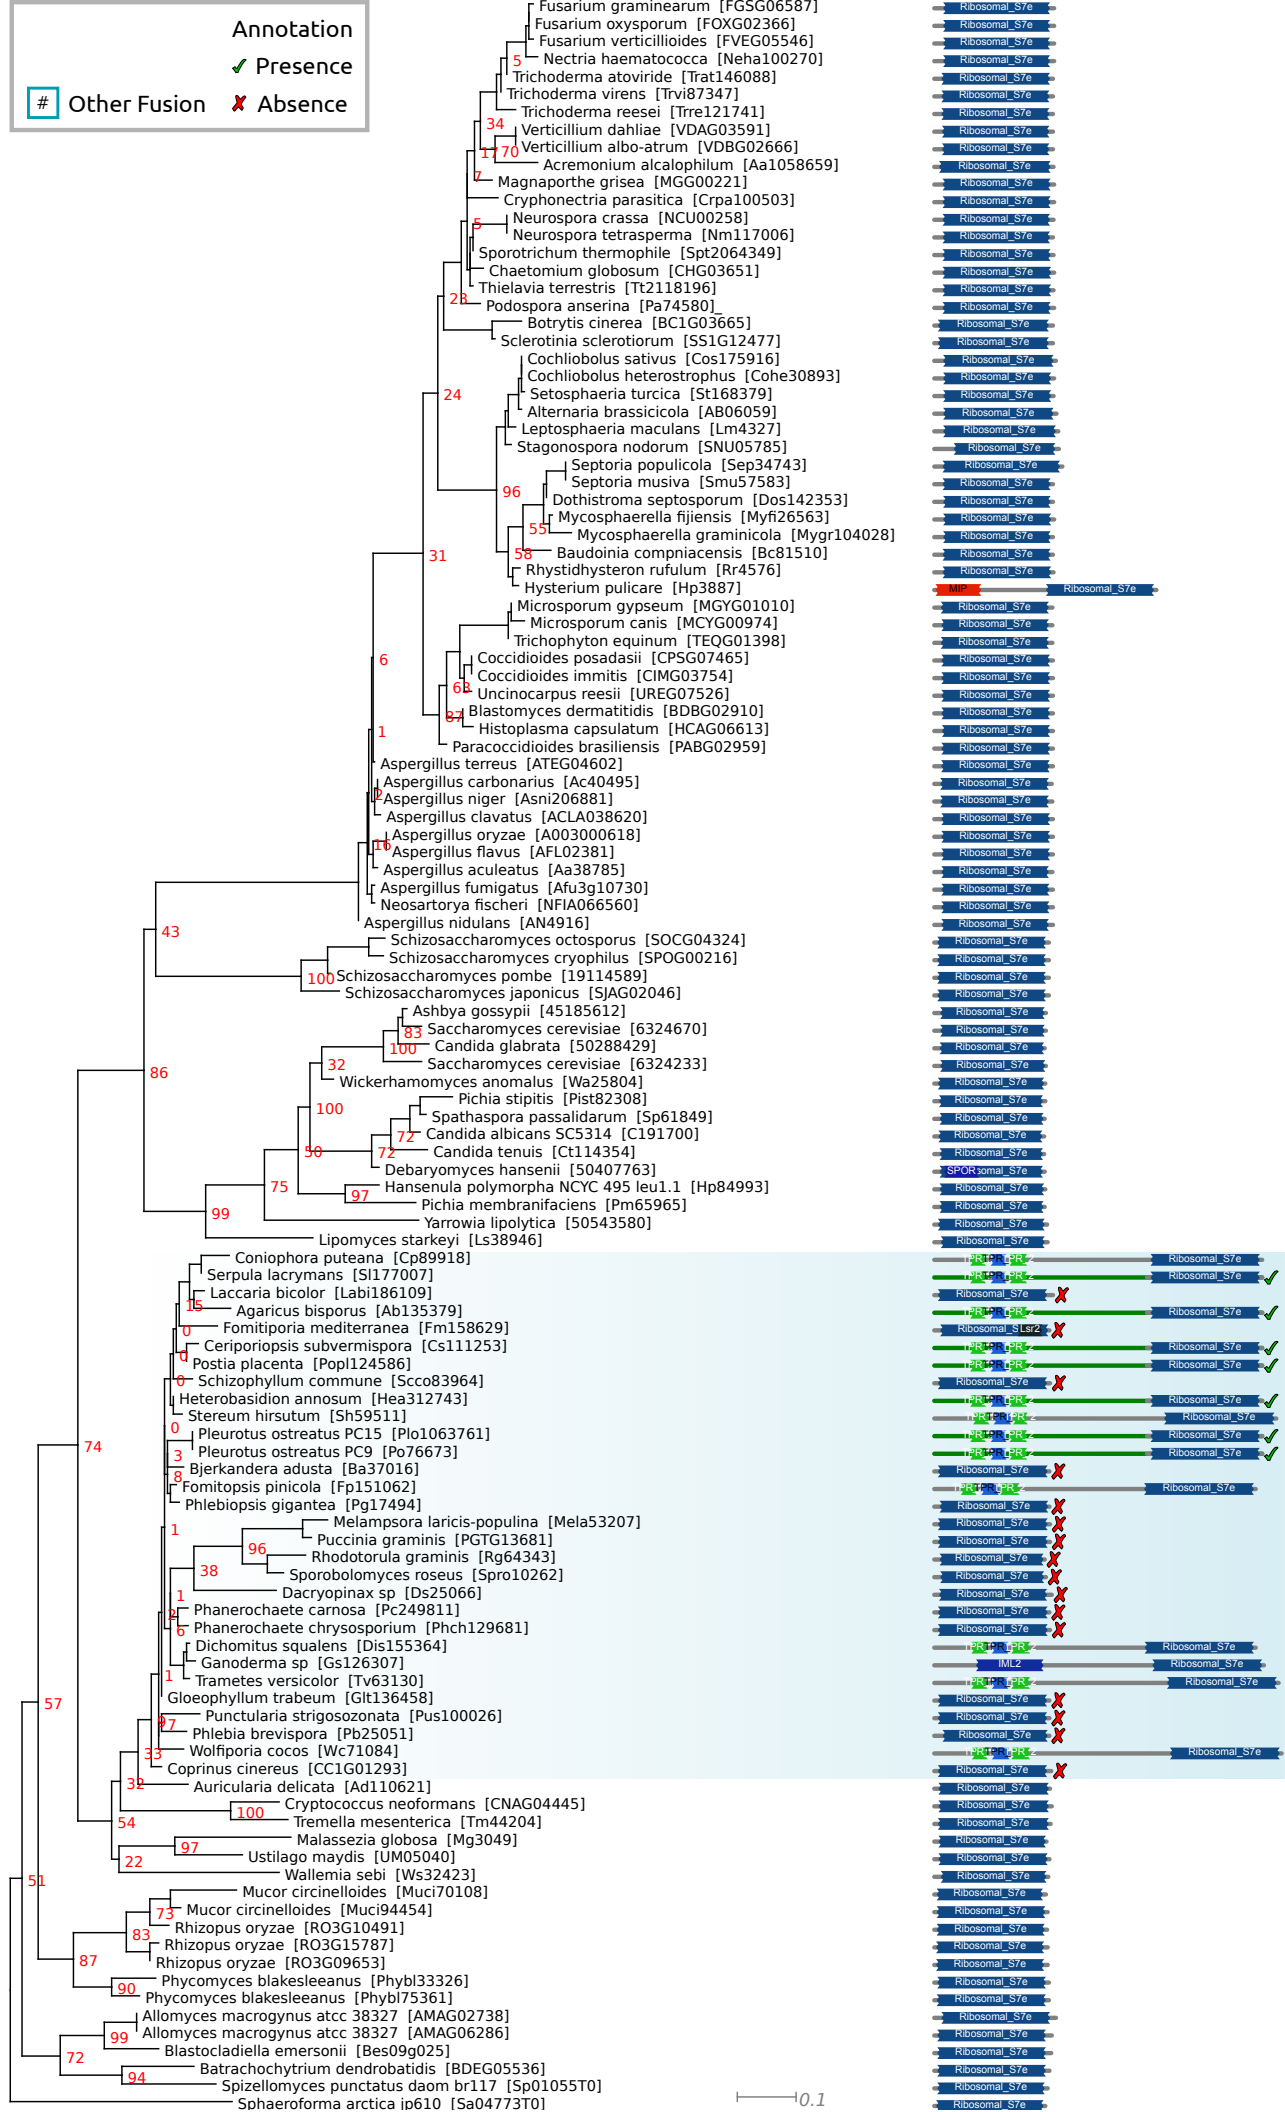

0.1



# Putative Fusion 57

September 27, 2012

## 1 Fasta Sequences

These are the unfused sequences identified by fdfBLAST belonging to the putative gene fusion in FASTA format. Accessions may be shortened, but belong to either the taxons individual genome project or NCBI's accession numbering.

```
>XP_5665871Crne_dom1
MAAPSETTIQLSPEAEAQYERITRNLQEVTSGEVIRKVLSEKVVKAYWGTAPTGRPHIA
YCVPLLKIADFLTAGVNVKVLADLHAFDLASKSTLETQYRVKYYSKLLITVFTVLGVP
TDKLEFITGSSYQLKPDYTLDVYRFHALTSTREAEHAGADVVKESPLMSSLLYPGLQA
LDEQYLDVDFQFGGVDQRKIFMYAATFLPKLGYSKRAHLMNAMVPGLSGGKMSASDPKSK
IDFLDTAADIKSKIKAALCPPGEVENNGVIAFIKTVLIPIQALRIEQAERRGEKAPVGE
SFVKPGAPEGTIFSIISRPEKFGGDIHFKSYEDLEKAYVAGDIHPGDLKTGVQEALIQFLG
PIRKSFDEDEKWEQVERTAYPSSSVAPTAEPPKAVSNKIVSLKKKDVRSKPPTTEERAA
>XP_5665871Crne_dom2
LRAAKEKEKAATAAAKAVNEGTAAPPVPPVEDITASQLAQSSKEAVQITTSNATSSCVTST
NLSKLLKLLAKGKVRDIYALPGKEDEKLLFVATDRMSAFDVIIMNGIPSKGITLTTLSLF
WFDKLNIIIPNHVLHSPSACFSTPAQAWEQFPRSLDEYRDQLEGRSMIVKKCEVVKIEA
IVRGYITGSAWSEYKKSQTIHQMPAGLVESQKLPKALFTPSTKADQGEHDENIHPDKV
KDICGPELAAKIEKAAIQLYTEAAAYALERGLILADTKFEFGLLPDPSSPNKTTLILIDE
VLTDPSSRYWAAADYVVGQPQPSFDKQYLRDWLKEGLRGKEDVTLPEHVVSSETRSKYEE
ARDRVMGLGEFGKHGQKGIAGDEVALQTDQATDAIEEEEARKQL
```

## 2 Annotated Phylograms

All trees were generated from an initial run of Darren's Orchard pipeline against 139 taxa (Table S1), using the above corresponding un-fused sequences as BLAST seeds. The alignments were then checked for any missing taxa, manually masked and then ProtTest3 was run, please see the Methods section for detail. The final trees were generated by the following command:

```
phym1 -i alignment_file -d aa -b 100 -m model -c 8 -v invariant_sites -s BEST --quiet -a gamma
```

Styling and annotation was made possible by Dendroscope and Inkscape.

## 3 Mesquite Cladogram

This tree is the 68-gene concatenated phylogeny (Fig. 1), with the presence of a fusion (black), presence of a fission (white), and absent/undetermined (grey) status of gene fusion characters plotted on to it using a "1/0/-" nexus-style data matrix. We used the program 'Mesquite' to calculate proportional likelihoods based on either an "Mk1" or "Assym. 2 param model." (see Table S4) of character change across the fungal phylogeny (Fig. 1). This allowed for a proportional likelihood of the position of the fusion/fission to be calculated.

Annotation

✓ Presence

# Other Fusion ✗ Absence

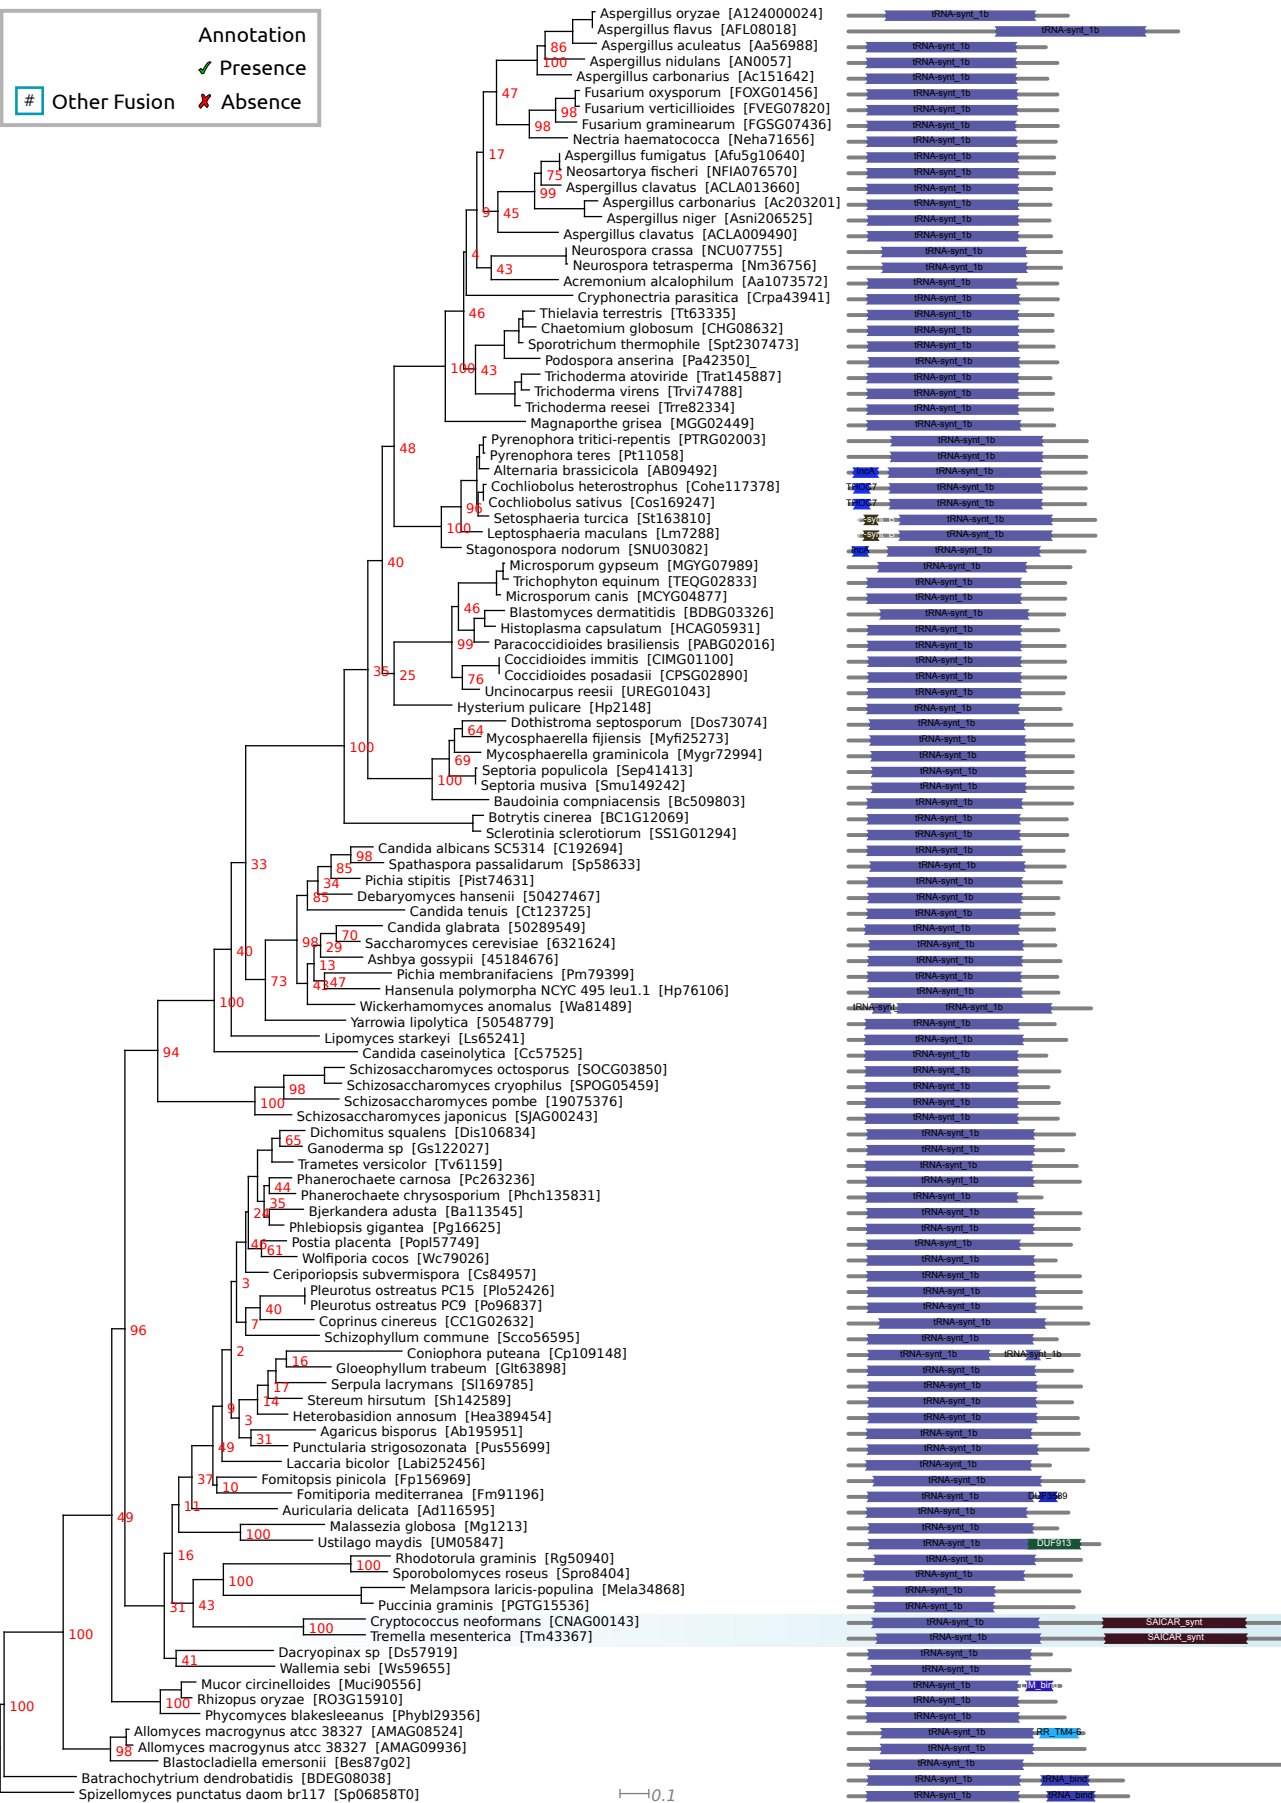

—|0.1



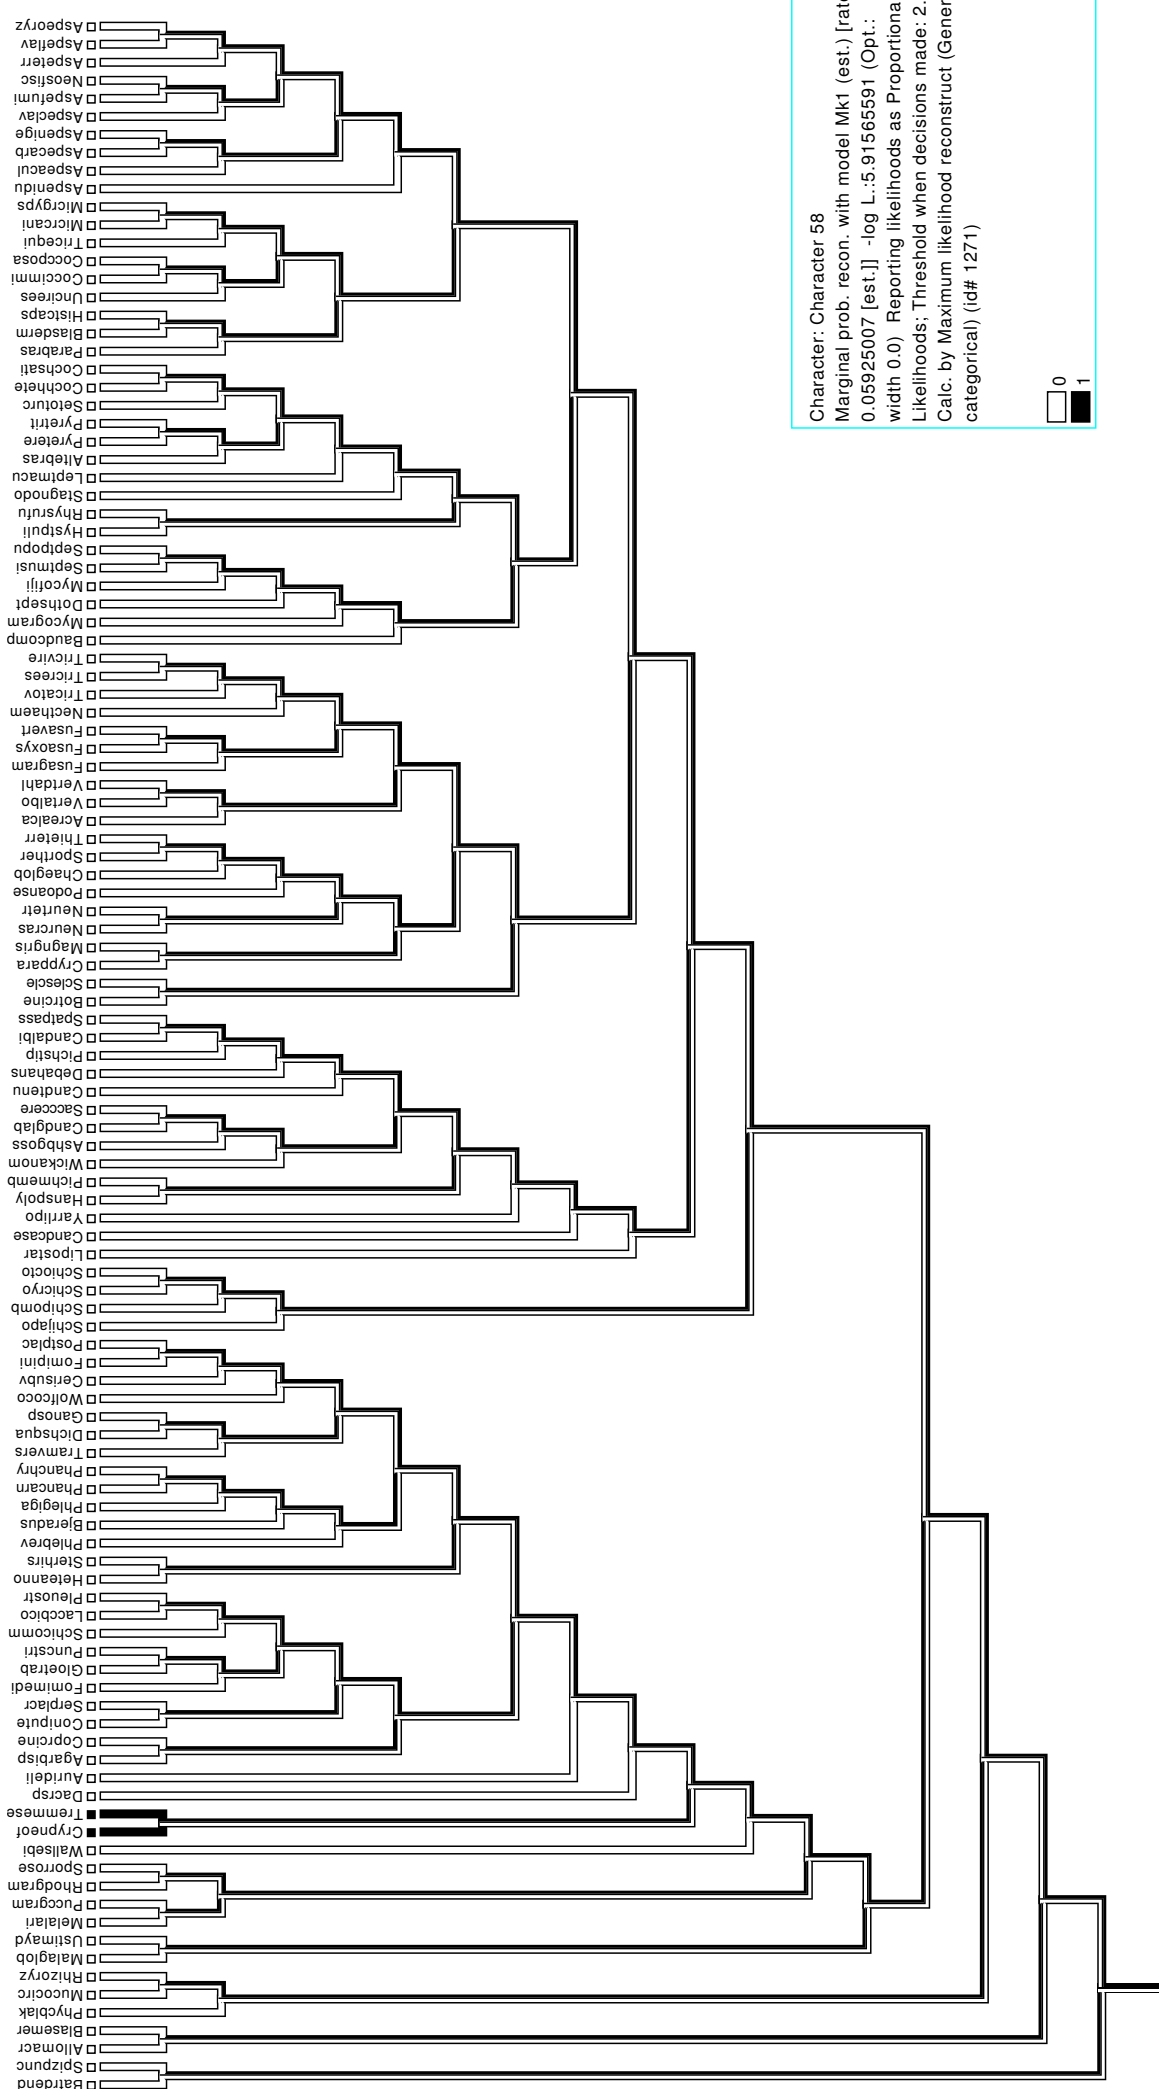

- Aspergiz
- Asperlav
- Asperter
- Neostisc
- Asperumt
- Asperclav
- Asperige
- Aspercarb
- Aspercul
- Asperidu
- Micryps
- Micrcant
- Tricqui
- Cocoposa
- Cocociml
- Unctrees
- Histcaps
- Blascderm
- Parabras
- Cochsatl
- Cochhete
- Setolure
- Pyreit
- Pytere
- Althebras
- Lepimacu
- Stagnodo
- Rhystru
- Hystpuli
- Sepipopu
- Sepimusl
- Mycotiji
- Dothsept
- Mycogram
- Baudcomp
- Tricvre
- Tricrees
- Tricatov
- Necthaem
- Fusavert
- Fusaoxys
- Fusagram
- Vertdahl
- Vertalbo
- Acrealca
- Thieterr
- Sportherr
- Chaeglob
- Podanse
- Neutrer
- Neurcras
- Magngfris
- Cyppara
- Sclcsle
- Botcine
- Spatpass
- Candabli
- Pichstip
- Debahans
- Candemnu
- Saccere
- Candglab
- Ashbgoss
- Wikanom
- Pichmemb
- Hanspoly
- Yarrilpo
- Candcasse
- Lipostar
- Schiocto
- Schicryo
- Schipomb
- Schifapo
- Postplac
- Fompmi
- Censubv
- Wollicoco
- Gansp
- Dichsqua
- Tamvers
- Phanchry
- Phancarn
- Phlegiga
- Bjeradus
- Phlebrev
- Stierhis
- Heteanno
- Pleustr
- Laccbico
- Schicom
- Punctri
- Gloetrab
- Fomimedi
- Serplacr
- Conipute
- Coprcine
- Agarhisp
- Aurideli
- Dacrsp
- Tremmese
- Crypneol
- Wallsebl
- Sporse
- Rhodgram
- Pucogram
- Melatari
- Ustimayd
- Malaglob
- Rhizoryz
- Mucocitc
- Phycblak
- Blasemer
- Allomacr
- Spizpunc
- Ratdend

# Putative Fusion 58

September 27, 2012

## 1 Fasta Sequences

These are the unfused sequences identified by fdfBLAST belonging to the putative gene fusion in FASTA format. Accessions may be shortened, but belong to either the taxons individual genome project or NCBI's accession numbering.

```
>XP_0012200951Chg1_dom1
MTSVYSPGSPILLPNGARIFNRLIDFLRQQYVRYGFQEVITPTIYKKALWAKSGHLENYS
DDMYTVTSTSPSRAEVTDRGEEAEYGLKPMNCPGHCLIFASQTRSRYRDLPIRYADFSPLH
RNEISGALSGLTRVRRFHQDDGHIFCRPSQIRDEIAKTLDFVRLTYGVLGLGPYRLVLST
RPEQYIGSEEDWTQAESALREALVGSRLQYTINPGDGAIFYGPKIDIILKSDGKEHQTAT
IQLDFQLPKRFNLEYTAPAPEFEKRGAITTDAELLA EYGPVQPVLIHRAVLGSAERLMAL
LIEHYKGGKWPFWLNPRQAIIVITVNNSEPVANWARQTRDILLGVSASTSTIEAASPTGLAI
DIDDSNRGVELKVVREAKTKGYGLIIGVGPR
>XP_0012200951Chg1_dom2
DVETKTVGVNATSLAKPDATFHEIKKLRIDMSPAKLRDYM LSSI KYNAMDLSNPSDPPP
DYITAARAHGIPLRQSAPIKKGPFPLELPILTHLRSKRVILASASPRRKALLAQVSIHHS
PPCFPLPSSQRTLLTTPNPQIGLTNLEIIPSTEPEDLDKKTHTPEEYVAATARRKCLAV
YQTALTRQQEATEHKQKQDVPNPVDPDRVLEDP AVVIAADTVIATRGGQILEKPRSEADH
VRMLTHLRD TIRHRVLTAVCVLAPKADATHPGYEIASHVEGTNVFFAGADDGLPDDVIES
YVRTREGADKAGGYALQGVGMVLVDKVEGSDNVIGLPVRKCLQLCERVVFRQGEEVEG
EDGE GDEE
```

## 2 Annotated Phylograms

All trees were generated from an initial run of Darren's Orchard pipeline against 139 taxa (Table S1), using the above corresponding un-fused sequences as BLAST seeds. The alignments were then checked for any missing taxa, manually masked and then ProtTest3 was run, please see the Methods section for detail. The final trees were generated by the following command:

```
phym1 -i alignment_file -d aa -b 100 -m model -c 8 -v invariant_sites -s BEST --quiet -a gamma
```

Styling and annotation was made possible by Dendroscope and Inkscape.

## 3 Mesquite Cladogram

This tree is the 68-gene concatenated phylogeny (Fig. 1), with the presence of a fusion (black), presence of a fission (white), and absent/undetermined (grey) status of gene fusion characters plotted on to it using a "1/0/-" nexus-style data matrix. We used the program 'Mesquite' to calculate proportional likelihoods based on either an "Mk1" or "Assym. 2 param model." (see Table S4) of character change across the fungal phylogeny (Fig. 1). This allowed for a proportional likelihood of the position of the fusion/fission to be calculated.



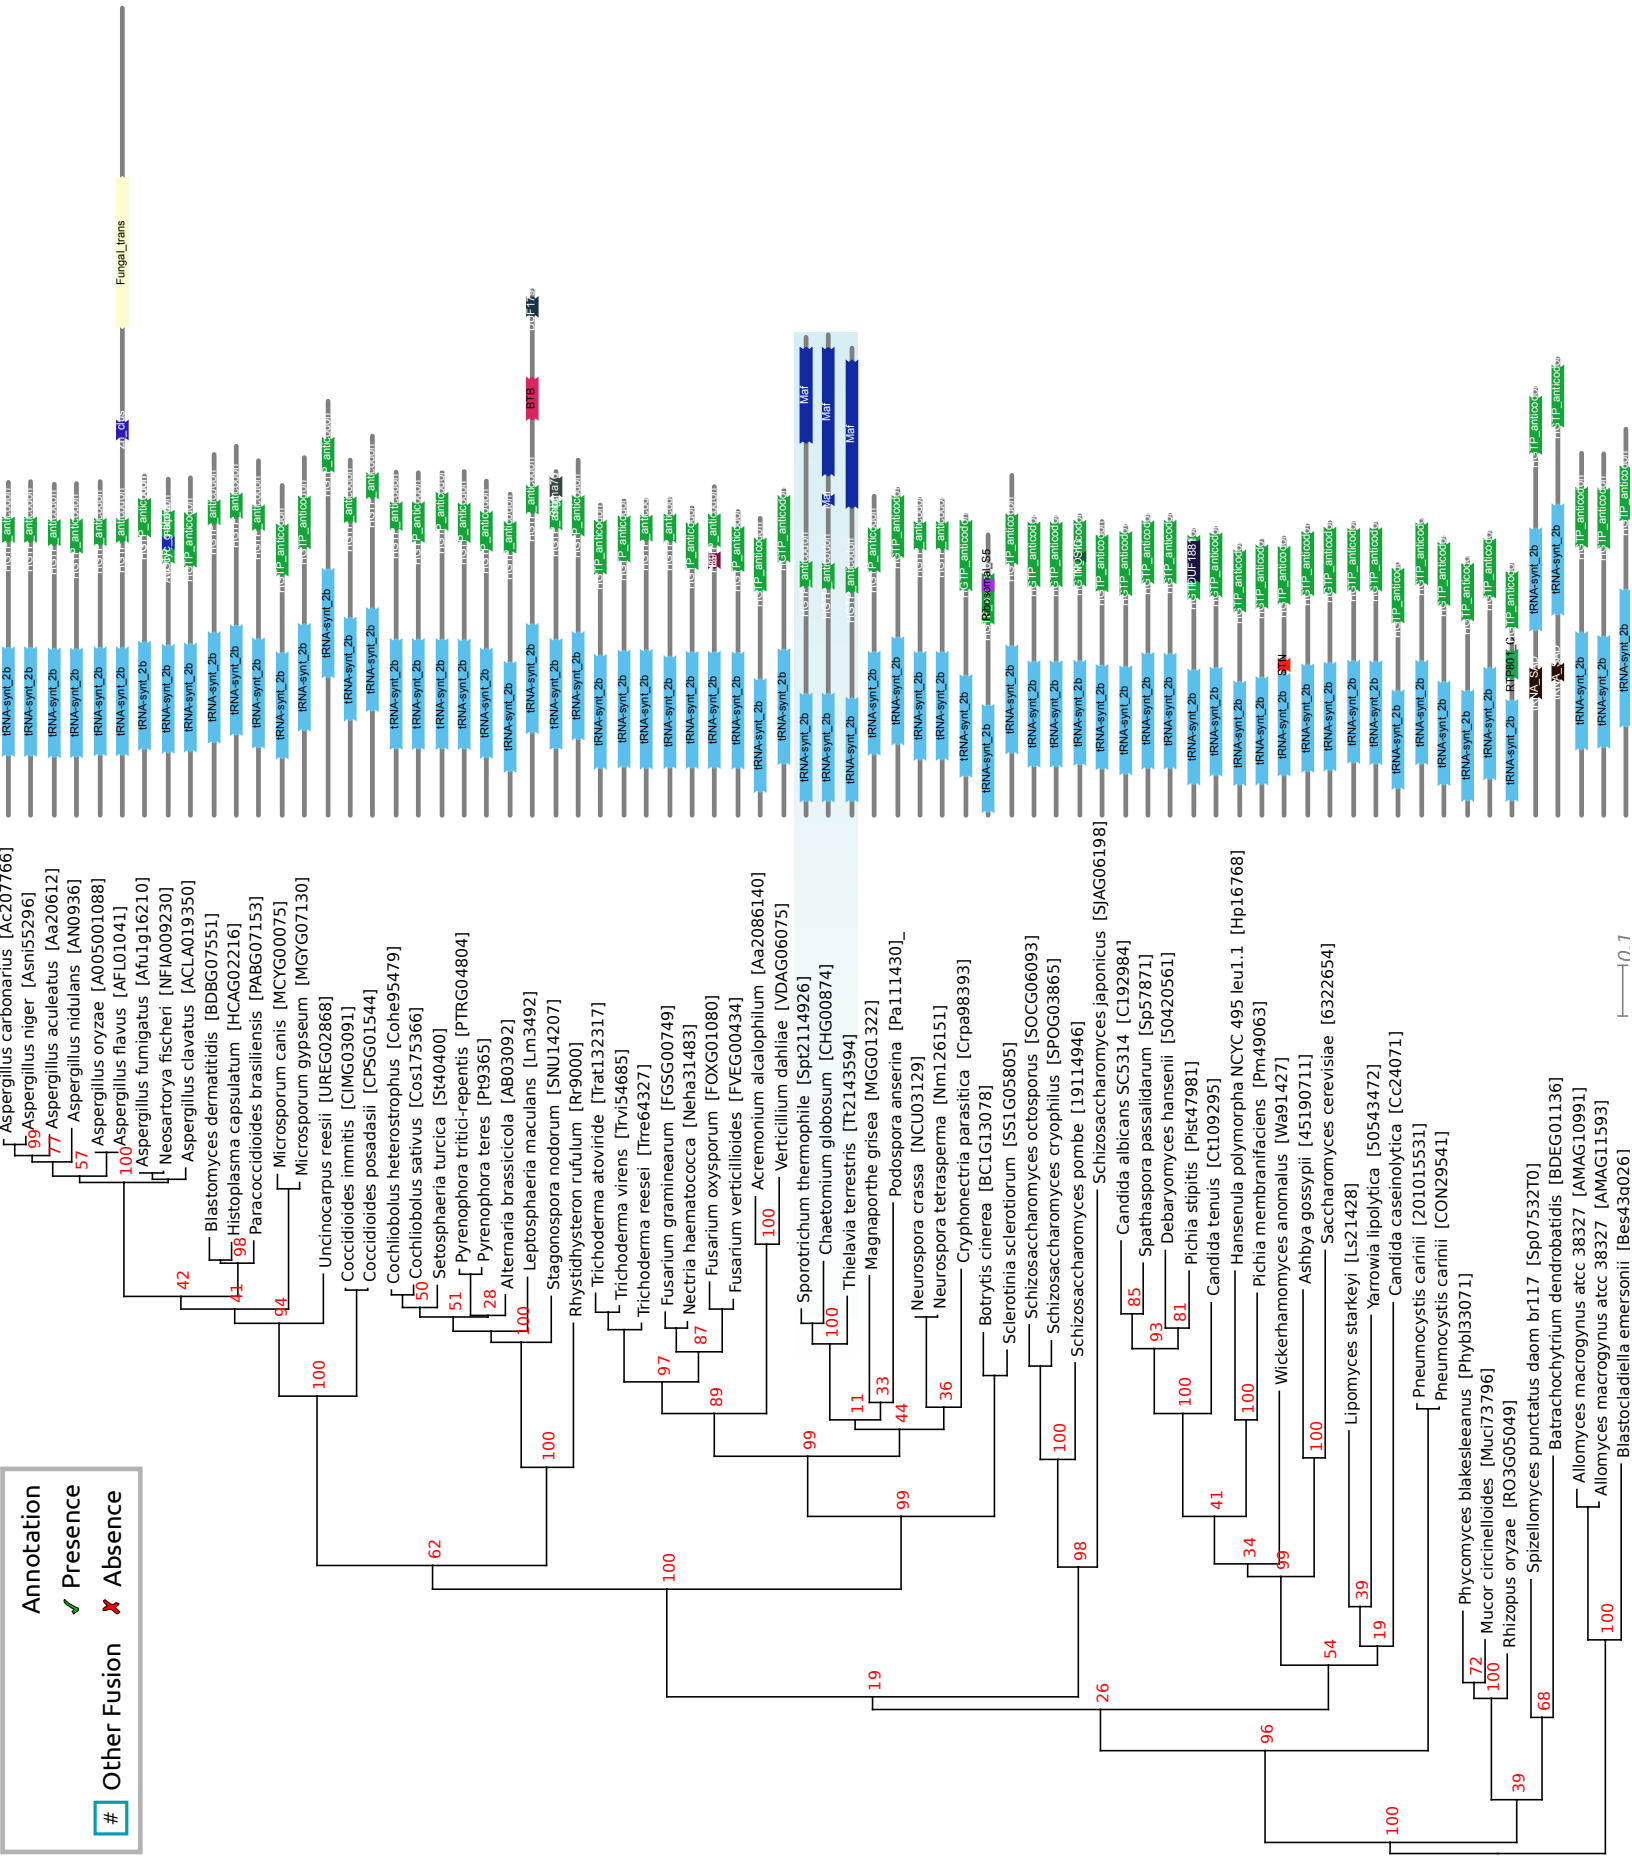





# Putative Fusion 59

September 27, 2012

## 1 Fasta Sequences

These are the unfused sequences identified by fdfBLAST belonging to the putative gene fusion in FASTA format. Accessions may be shortened, but belong to either the taxons individual genome project or NCBI's accession numbering.

```
>XP_0032960621Pyte_dom1
MRVYGFVPVIALALVGAAQSAALQPRDVLKDLRNQAMKALEAAEAKSIHEKKAGCSLFQAP
GRQDWNVMSAEERKAYISAVQCMYSSPSKSDPALVPGARTRYDDFVAQHINQTRSIHGTG
NFLTWHRYFVHAYEKALRQECGYTGYQPYWNWFTYQDDLRSPIFDGSDTSMGGDGTFFVQ
HNGSTGGGGTIYLPSSGQGGGCCISSGPFKGLQLNLGPI SPTMDGQNKSVSELGYNPRCAKR
DLTTYASSTWLTIDNLLNITSGAASLNVGTFQNELQGRFPDGFGLGHAAGHFSINGDAGD
FYSSPNDPVFFLHHTMLDYAYWLWQAFHPDQAGTVMGTRTRFSPPTAEKTTLQDVISMNYL
>XP_0032960621Pyte_dom2
NVDDVTIEDLMDTYFHKKHYFSSPKCPSHYLGMTKPIPIIGAGIAGLTLGRCLLHRGIPFV
LYEKASSKPRNSYAITLHSSAYRPLLSVLGIDEVTFKRRVAVDSETGGTGTIAQEVPLPN
HNGLYDTSSSFRANRAKFEQVLQQGIDIRWEHTLQSVETTPEGPKLQFHNGDSCSAKLAV
AADGVHSNVRKLLLPAAVEILPYAVFNGKRKADYKSFQVYGSAMEESNVIEKKQNDAI
LSASINDKKDDQIYINWIYSRPAREDPDPLRPNRPLEGAQKIPDELFEVSSFDNLTPP
FSKVFDSSETMRGDRMLHLMRRTSAPLPSLQNVLTKSGVCFVGDALHAEPVGGNGANAA
ILDGLTLAEAIERGGGGISTWYAGRYATWTLGVEESQQAIANMHHPKQLHGHL
```

## 2 Annotated Phylograms

All trees were generated from an initial run of Darren's Orchard pipeline against 139 taxa (Table S1), using the above corresponding un-fused sequences as BLAST seeds. The alignments were then checked for any missing taxa, manually masked and then ProtTest3 was run, please see the Methods section for detail. The final trees were generated by the following command:

```
phym1 -i alignment_file -d aa -b 100 -m model -c 8 -v invariant_sites -s BEST --quiet -a gamma
```

Styling and annotation was made possible by Dendroscope and Inkscape.

## 3 Mesquite Cladogram

This tree is the 68-gene concatenated phylogeny (Fig. 1), with the presence of a fusion (black), presence of a fission (white), and absent/undetermined (grey) status of gene fusion characters plotted on to it using a "1/0/-" nexus-style data matrix. We used the program 'Mesquite' to calculate proportional likelihoods based on either an "Mk1" or "Assym. 2 param model." (see Table S4) of character change across the fungal phylogeny (Fig. 1). This allowed for a proportional likelihood of the position of the fusion/fission to be calculated.



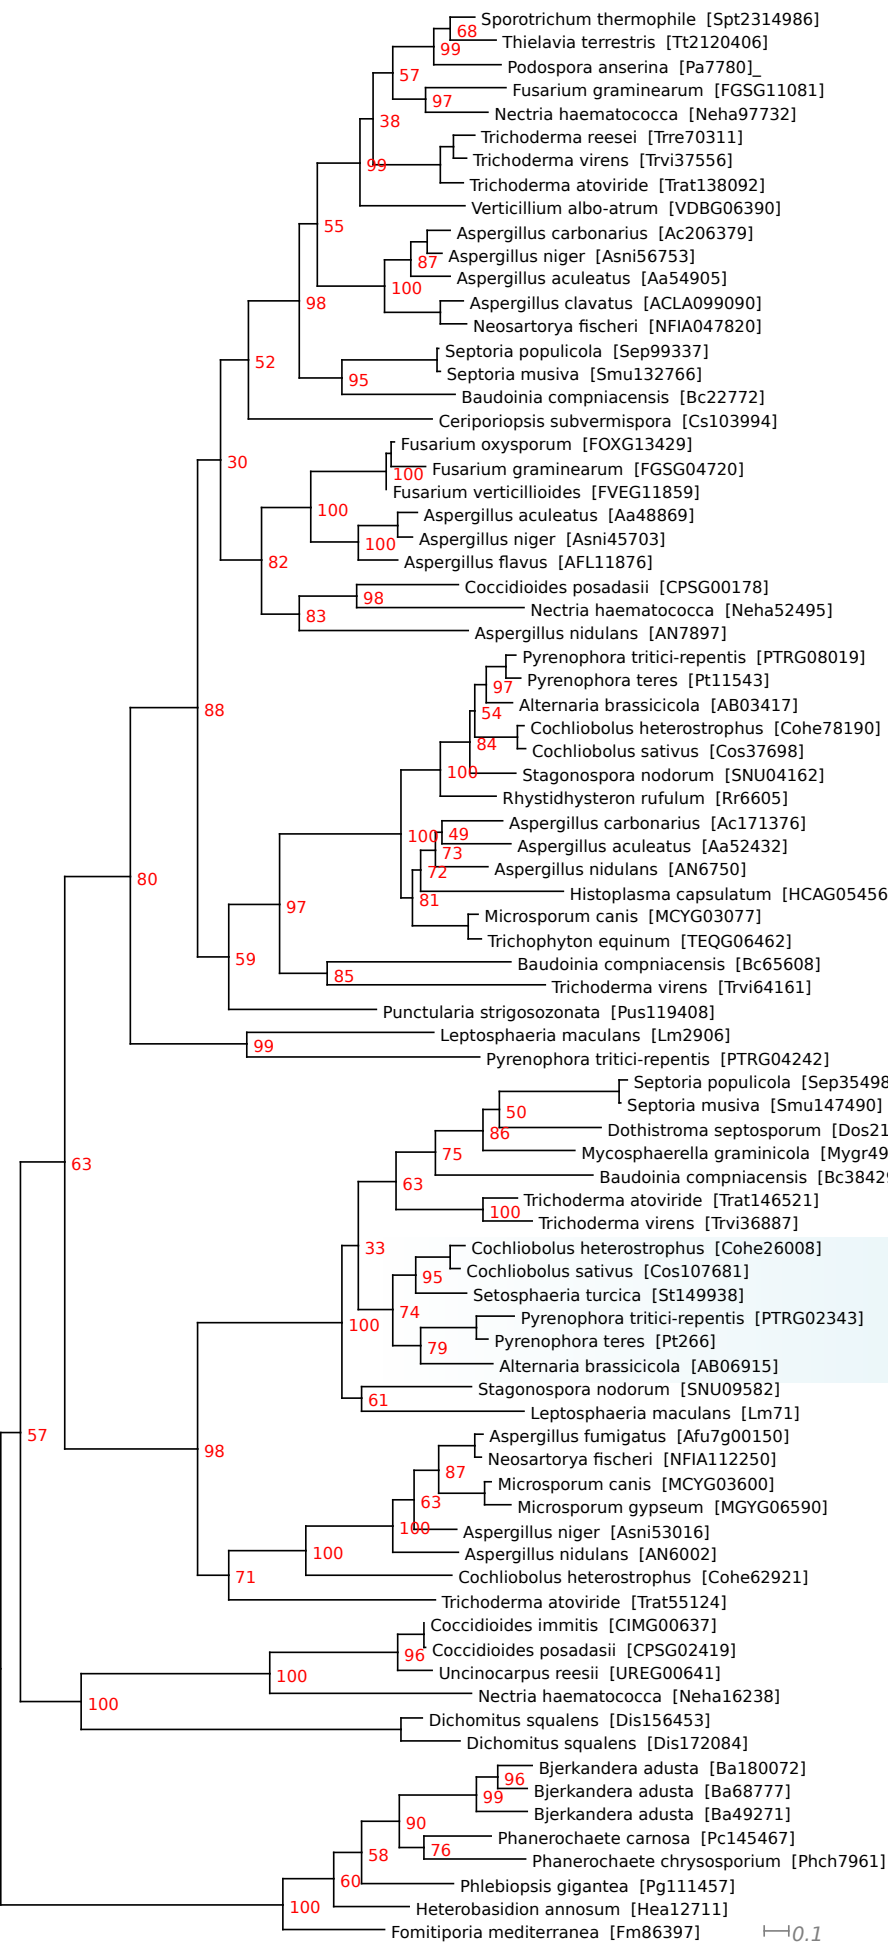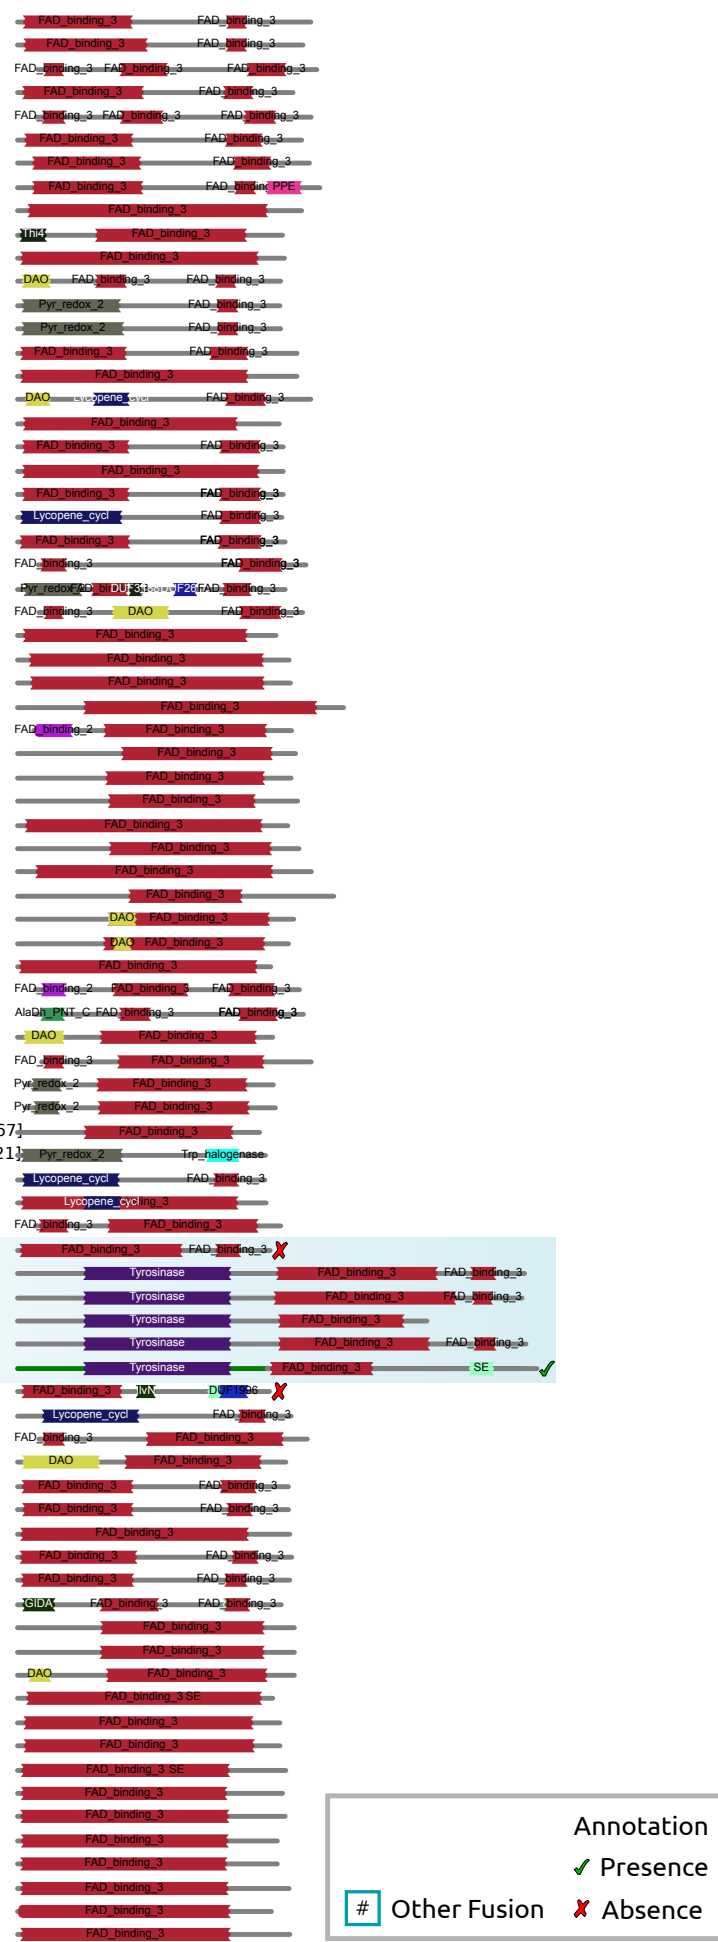

Annotation

- ✓ Presence
- ✗ Absence
- # Other Fusion





# Putative Fusion 60

September 27, 2012

## 1 Fasta Sequences

These are the unfused sequences identified by fdfBLAST belonging to the putative gene fusion in FASTA format. Accessions may be shortened, but belong to either the taxons individual genome project or NCBI's accession numbering.

```
>XP_0018066581Phno_dom1
MAAIIASSIFSLIFGGCCANVYCLEAIVKKEPDSGLLITLFFQVFTCLSTLHYQFDPNG
RYFLRSSPVPFRKWCVSATLFFTVNMLNNWAFANISVPVHIILRSFGSVTTMAAGWARG
KRYTRLQVFSVAILTAVMVS AWADAQSKGKLANSSKVDMTSGSFEAGLVILLIAQLLSA
WMGAYVEDIYRDHGKDWQANLFYSHLLSIPMFAGFAPILYDQFTRLQSSSESFSVPVSVAA
QLPPSLNKALASTSQHVIYLTANAVTQLLCITGVNILSANTS AVTVTIVLNIRKLVSFML
SIWIFGNQMGGLMKVAGMVFAGALYGWETS YRIPQQKKLES AKGKKGSLKIESTMSSP
>XP_0018066581Phno_dom2
GGQVRQRATKDKKRPTTPNPEALAEKVSEKVPVHVLEKVKPYKPAQQGGEWDYKLAIAVMT
VLAFITRFWGI RHPDQVVFDEVHFGKFASYLQRTYFFDVHPPFGKLLFAFAGWLVGYKG
DFLFENIGDSYITNKVPYVAYRAMPASLGALTVPIVFMIMWESGYSLPACVTAAGLMLLD
NAHIGQTRLILLDASLIFMALS VLSYIRFYKLRHEPFGRKWWKLLLTGVNLSCVISIK
YVGVFTFFSVGVPAIDLDLWDLMDVKRRQGALSLPEFGKHLAARVIGLIVVPFLLYLFWFQ
VHFSILSRSGPGDDFMTPEFQETLSDNMMTLQSVGIDYYDSITLRHKETKVYLHSHDPDRY
PLRYDDGRVSSQGGQVVTGYPHNDTNNHWQILPATTLPSEKEANGSRFNDFEIKVDKGG
GDFKTMSTHFKLVHVPTKVAMWHTSPLPDWAYKQAEINGNKNIQQSSNVWYVDDIPSLP
AEDPRNKKEAKQVKRLSFLRKWVELQRAMFYHNNALTSSHPYASQPISWPFLLRGVSFWT
HNDTRQIYFLGNPIGWLLASSLLAVFAGIIGADQLALRRGMDALDDRTRSRLYNSTGFF
FLTWAAHYIPFYIMGRQLFLHHYLP AHLASCLVTGALVEFIFCIEPMDVESPTIKGHRRT
QSRPVRERMATTSQMGSWIATGVILAATLWSFLFFAPLTYGSPGLDVAQVQARKWLG YDL
HFAK
```

## 2 Annotated Phylograms

All trees were generated from an initial run of Darren's Orchard pipeline against 139 taxa (Table S1), using the above corresponding un-fused sequences as BLAST seeds. The alignments were then checked for any missing taxa, manually masked and then ProtTest3 was run, please see the Methods section for detail. The final trees were generated by the following command:

```
phym1 -i alignment_file -d aa -b 100 -m model -c 8 -v invariant_sites -s BEST --quiet -a gamma
```

Styling and annotation was made possible by Dendroscope and Inkscape.

## 3 Mesquite Cladogram

This tree is the 68-gene concatenated phylogeny (Fig. 1), with the presence of a fusion (black), presence of a fission (white), and absent/undetermined (grey) status of gene fusion characters plotted on to it using a "1/0/-" nexus-style data matrix. We used the program 'Mesquite' to calculate proportional likelihoods based on either an "Mk1" or "Assym. 2 param model." (see Table S4) of character change across the fungal phylogeny (Fig. 1). This allowed for a proportional likelihood of the position of the fusion/fission to be calculated.

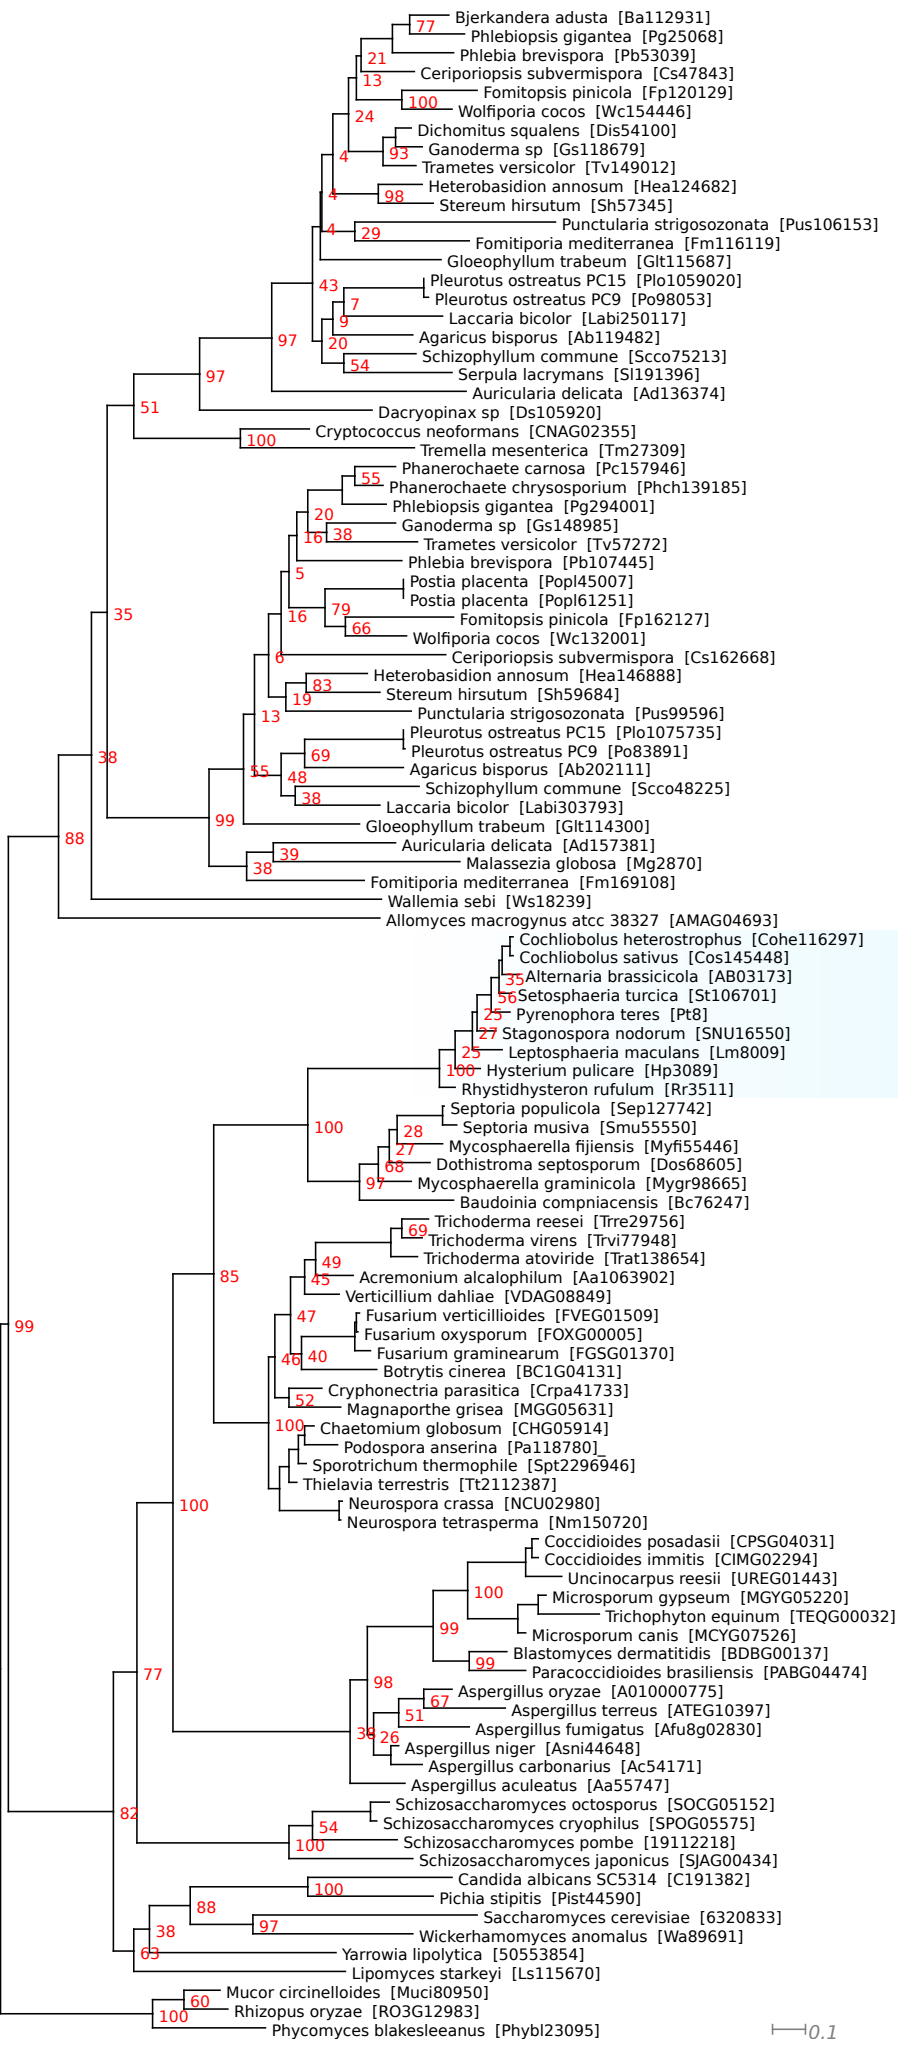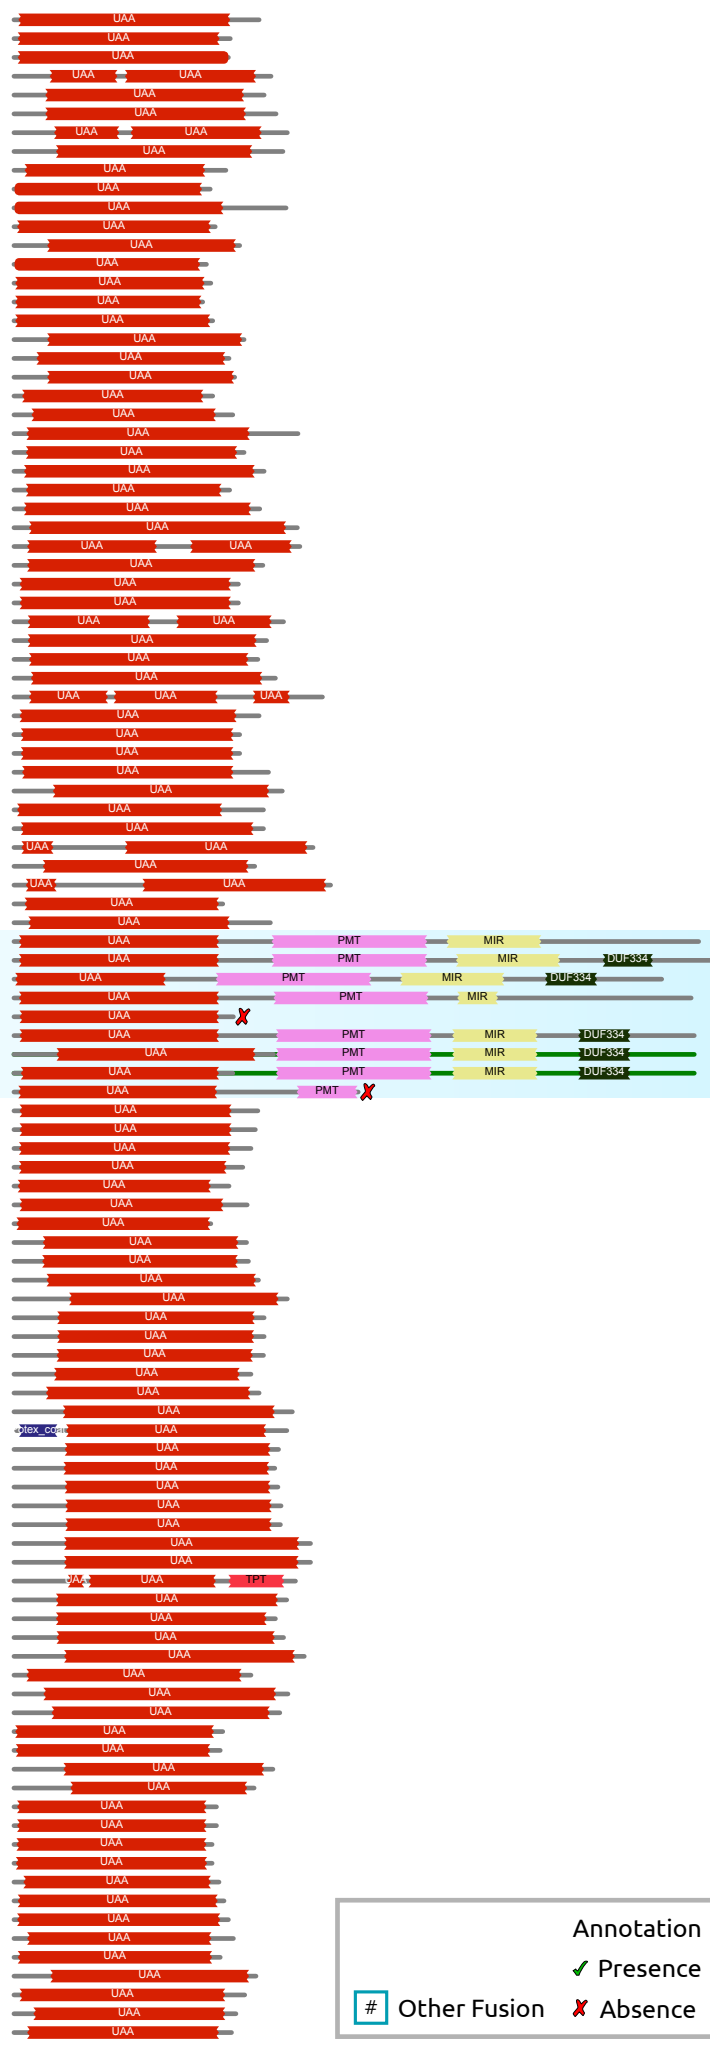

Annotation  
 ✓ Presence  
 ✗ Absence

# Other Fusion

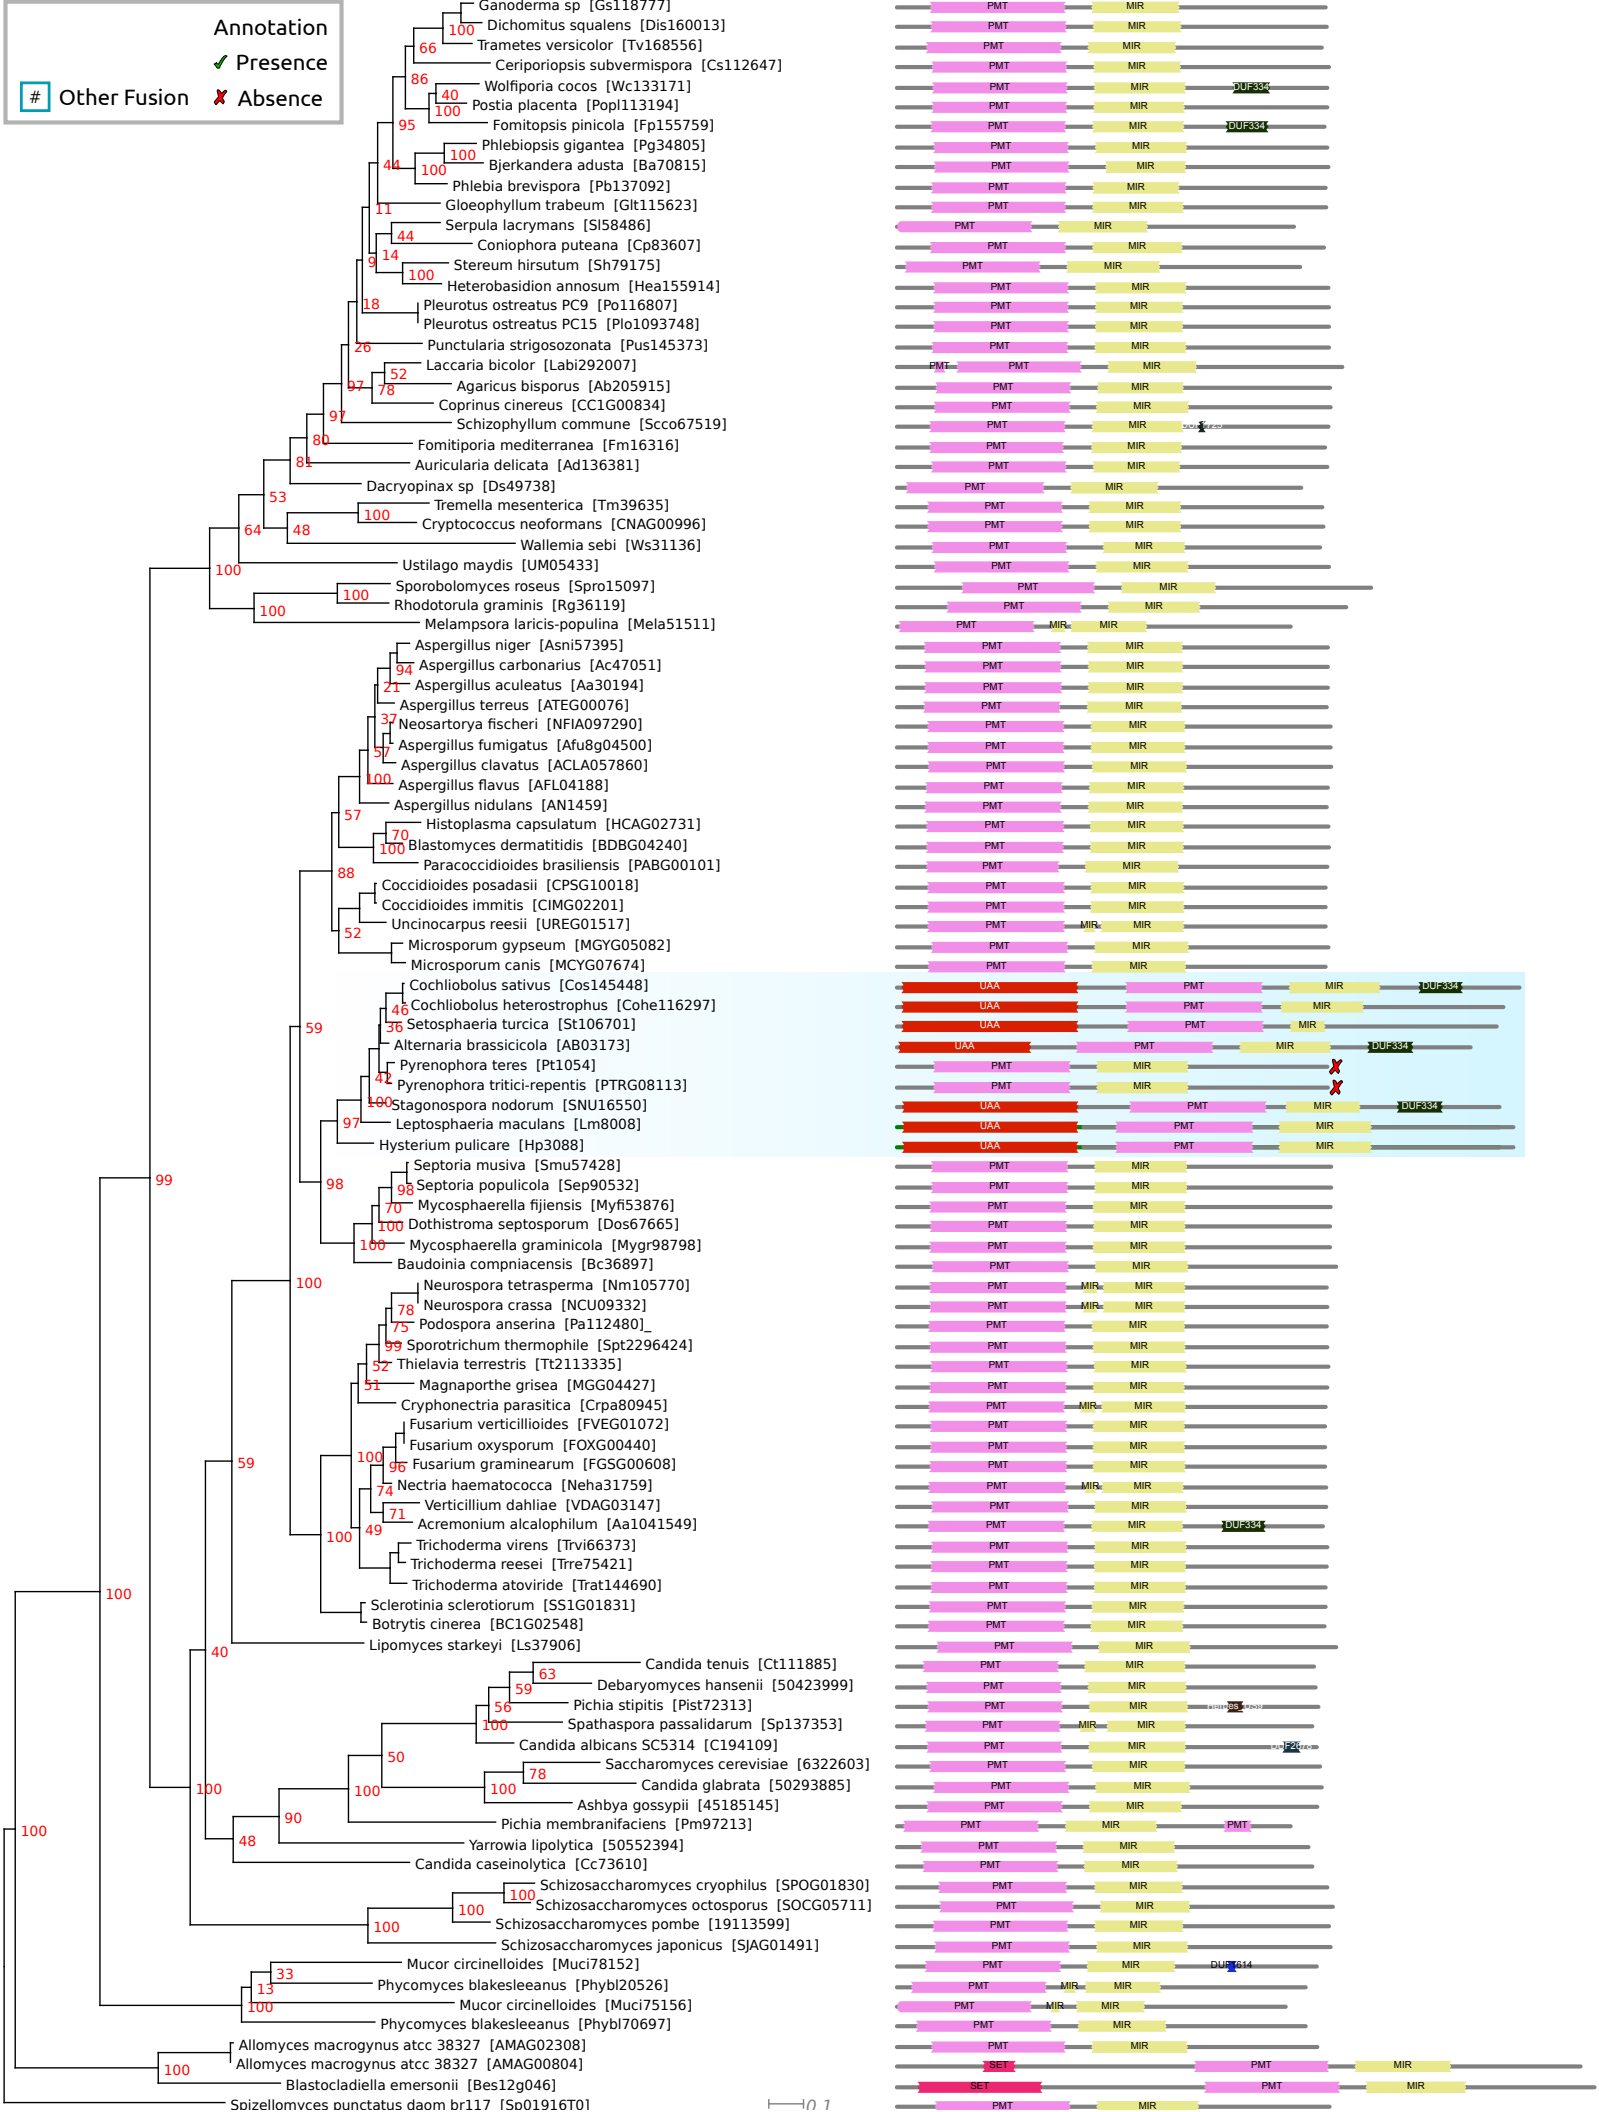

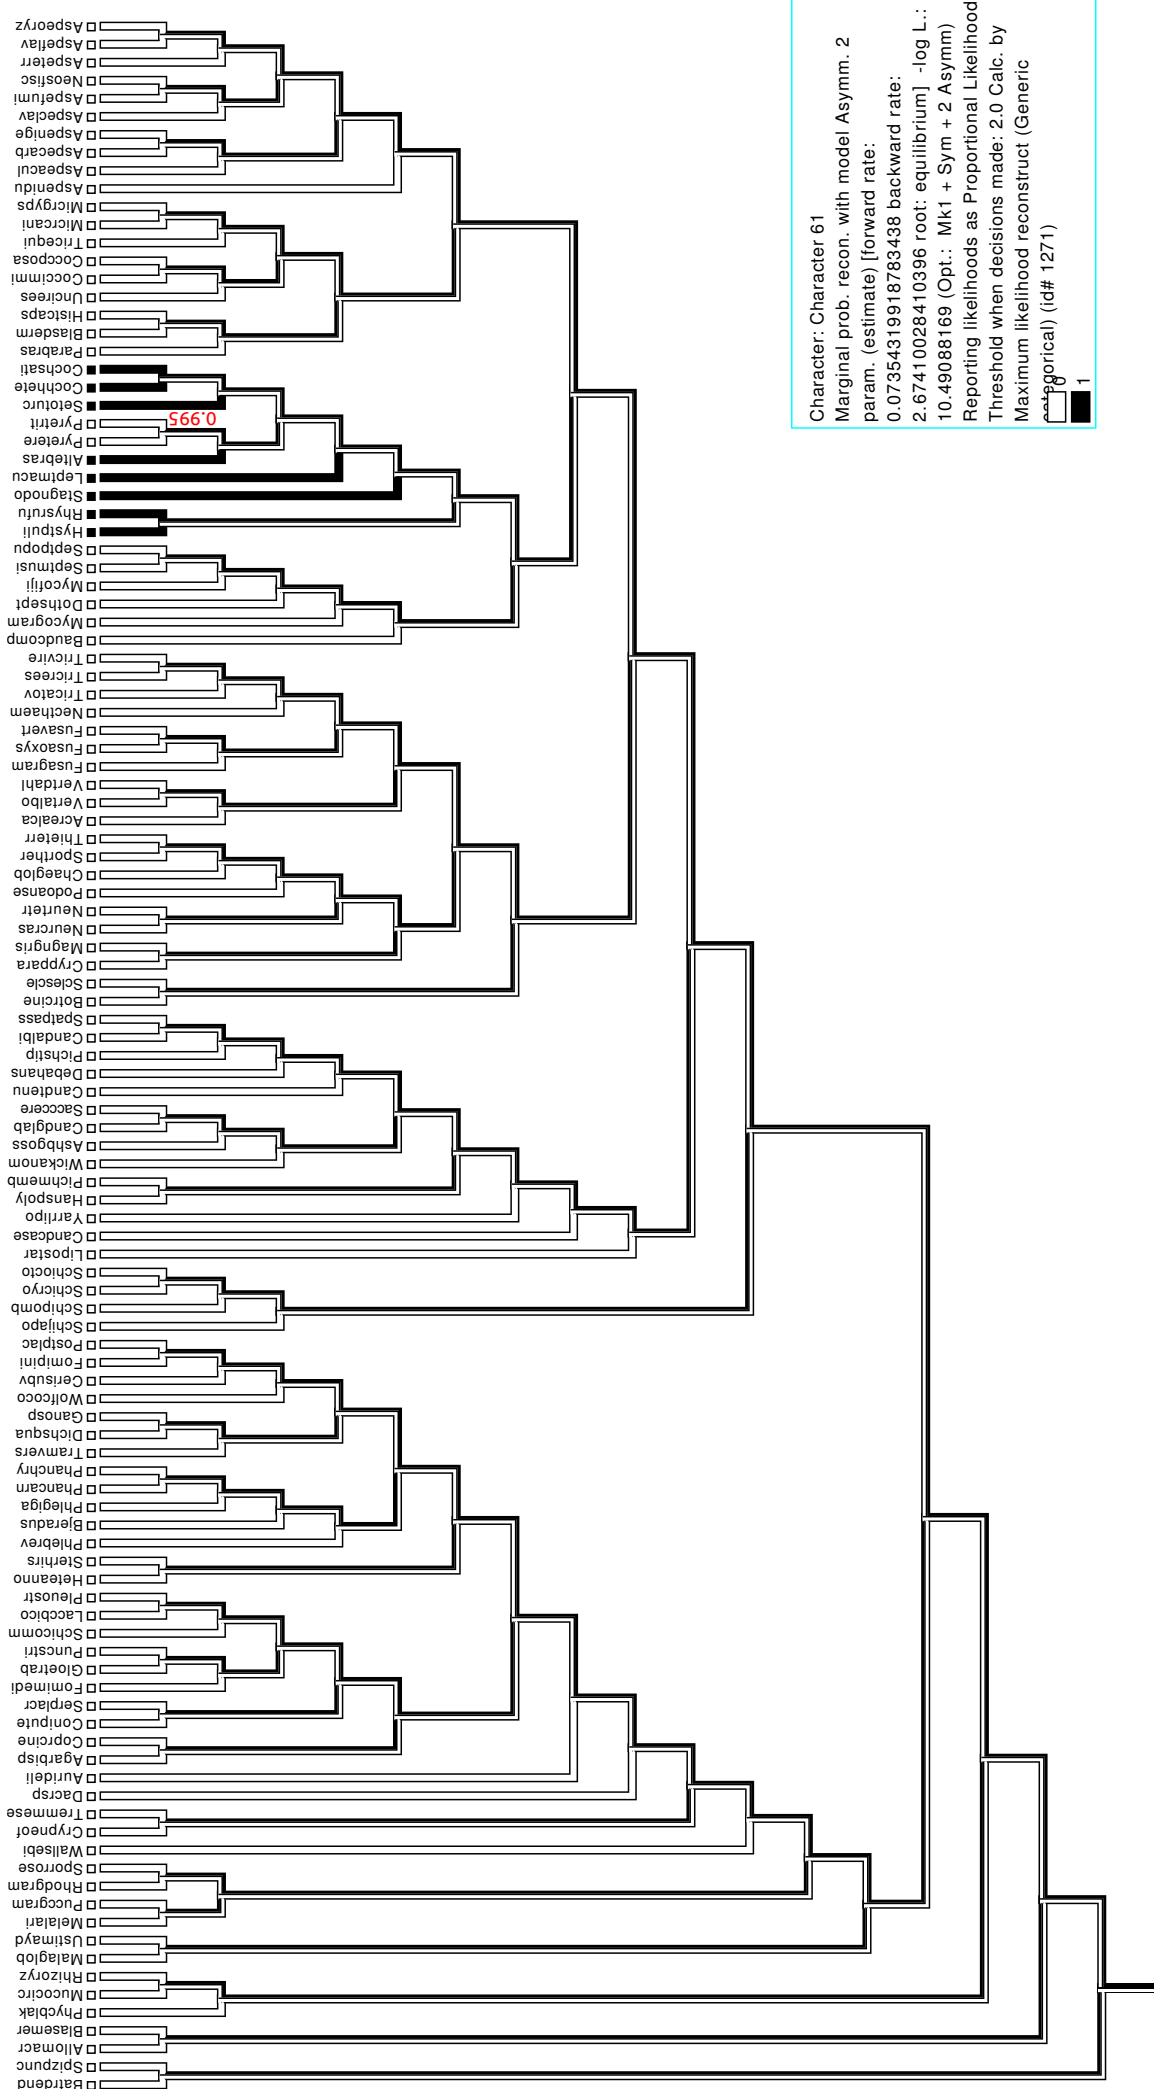

- Rattand
- Spizunc
- Allomacr
- Blasemer
- Phybllak
- Mucocitc
- Rhizoyz
- Malaglob
- Ustimayd
- Melatari
- Puccgram
- Rhodgram
- Sporose
- Wallsebl
- Cypneot
- Tremmese
- Dacrsp
- Auridel!
- Agarhisp
- Coprine
- Conipute
- Serplacr
- Fomimed!
- Gloetrab
- Punctri
- Schicom
- Laccbico
- Pleuost
- Heteanno
- Sterhirs
- Phlebrev
- Bjeradus
- Phlegiga
- Phancarn
- Phanchry
- Tamvers
- Dichsqua
- Ganosp
- Wolffcoco
- Cersubv
- Fompmi!
- Postplac
- Schipomp
- Schicyo
- Schiocto
- Lipostar
- Candcasse
- Yarrilpo
- Hanspoly
- Pchmemb
- Wikanom
- Ashbgoss
- Candglab
- Saccere
- Candtemu
- Debahans
- Pchstip
- Candabi!
- Spatpass
- Botcine
- Sclescle
- Cyppara
- Magngfris
- Neuras
- Neutrtr
- Podanse
- Chaeglob
- Sporther
- Thieterr
- Acrealca
- Vertalbo
- Verdahl
- Fusagram
- Fusoxys
- Fusavert
- Necthaem
- Tricatov
- Tricrees
- Tricvire
- Baudcomp
- Mycoqram
- Dothsept
- Mycotiji!
- Sepimus!
- Sepipopu
- Hystipuli
- Rhystrfu
- Stagnodo
- Lepinacu
- Aliebras
- Pyeter
- Pyetrit
- Cochoete
- Cochsati
- Parabras
- Blasdarm
- Hiscaps
- Unctrees
- Coccimmi
- Cocoposa
- Tricqui!
- Micrcani
- Micryps
- Aspensidu
- Aspacul
- Aspacarb
- Aspacige
- Aspaclav
- Aspacum!
- Neostisc
- Aspeterr
- Aspetlav
- Aspeoryz

# Putative Fusion 61

September 27, 2012

## 1 Fasta Sequences

These are the unfused sequences identified by fdfBLAST belonging to the putative gene fusion in FASTA format. Accessions may be shortened, but belong to either the taxons individual genome project or NCBI's accession numbering.

```
>XP_6815211Asni_N212
MKRLNRLLRHVHARAKPQQPSSSNDQVLPVLSQPPIAFAQDVPQTPIASSEPLSVFAHFLVGVAGSMS
PAWEHNIIAAQEAHIDGFALNIAPQDDYTDQVLQTAYEAAERIGDFSLFISFDYESGGAWPVDRVISTI
NRYKGRPAQYLYK GKPLVSTFEGSKSSDDWPAIKQATGCVFVPSWTSLSRSLYTVHGTIDGAFSWDAWP
VGAQEKDTSDDKAWMNALS GKPYMMAVSPWFYTNLPQWNKNLWLRGDDLWHYRWQQVIDLQPAMVQILSW
NDYGEAHYIGPIYEPGIEGASWFKGCPHDAREFLPHYIDAYRRRSAMFRERASNPATVTSFAPRRPL
SYTDKIVYWYRLNPSHSGSADGTTGNNPNMGQPGLDPGEVSDRVFVSVLVTEPSQVHIQIGPAASRVLI
AKESGVNHYSVPFDGHS GPVRIAIVRHGREVK TATGPAITEECTDGKKILSDIHHHESNLAYRQYAQLPE
TLHLNYQPPTATATPAAHTSPIPEAINPDDYSQAYCDFMTEHTIFHAVDGFSGKQLESKGYKYLSERELW
TPQLKRGGKYTTTRNGSSLIAFSVGPYKSGNGLAIIAGHIDAL TAKLKPVSKLPNKAGYIQMGVAPYAG
GLGKTWDRDL SIGGKVLVRNASTGKVESKLVKLNWPIARIPTLAEHFGAPSQGPFNKETQMVPIIGVDN
SDLFQSTTPAADEGIEPGTFASTQPPKLIKVISKELGITNYSSILSWELELYDSQPARIGGIDKDFIFAG
RIDDKLCCYAAQEALMATS DHTSPSSIKMVG YFDDEEIGSLLRQGARSNFMSSVIERIAQSFATSYGPD
LAQTVAKSFLISSDVIHAVNPNFLNVYLENHAPRLNVGVSVSADSNGHMTTDSVSYGFIKRVAEKCGSQL
QVFQIRNDSRSGGTIGPMTSSRIGMRAIDVGIPQLSMHSIRATTGSRDPGLGVKLFKGGFFDYFEEVDHNI
```

## 2 Annotated Phylograms

All trees were generated from an initial run of Darren's Orchard pipeline against 139 taxa (Table S1), using the above corresponding un-fused sequences as BLAST seeds. The alignments were then checked for any missing taxa, manually masked and then ProtTest3 was run, please see the Methods section for detail. The final trees were generated by the following command:

```
phymml -i alignment_file -d aa -b 100 -m model -c 8 -v invariant_sites -s BEST --quiet -a gamma
```

Styling and annotation was made possible by Dendroscope and Inkscape.

## 3 Mesquite Cladogram

This tree is the 68-gene concatenated phylogeny (Fig. 1), with the presence of a fusion (black), presence of a fission (white), and absent/undetermined (grey) status of gene fusion characters plotted on to it using a "1/0/-" nexus-style data matrix. We used the program 'Mesquite' to calculate proportional likelihoods based on either an "Mk1" or "Assym. 2 param model." (see Table S4) of character change across the fungal phylogeny (Fig. 1). This allowed for a proportional likelihood of the position of the fusion/fission to be calculated.

Annotation  
 ✓ Presence  
 ✗ Absence  
 # Other Fusion

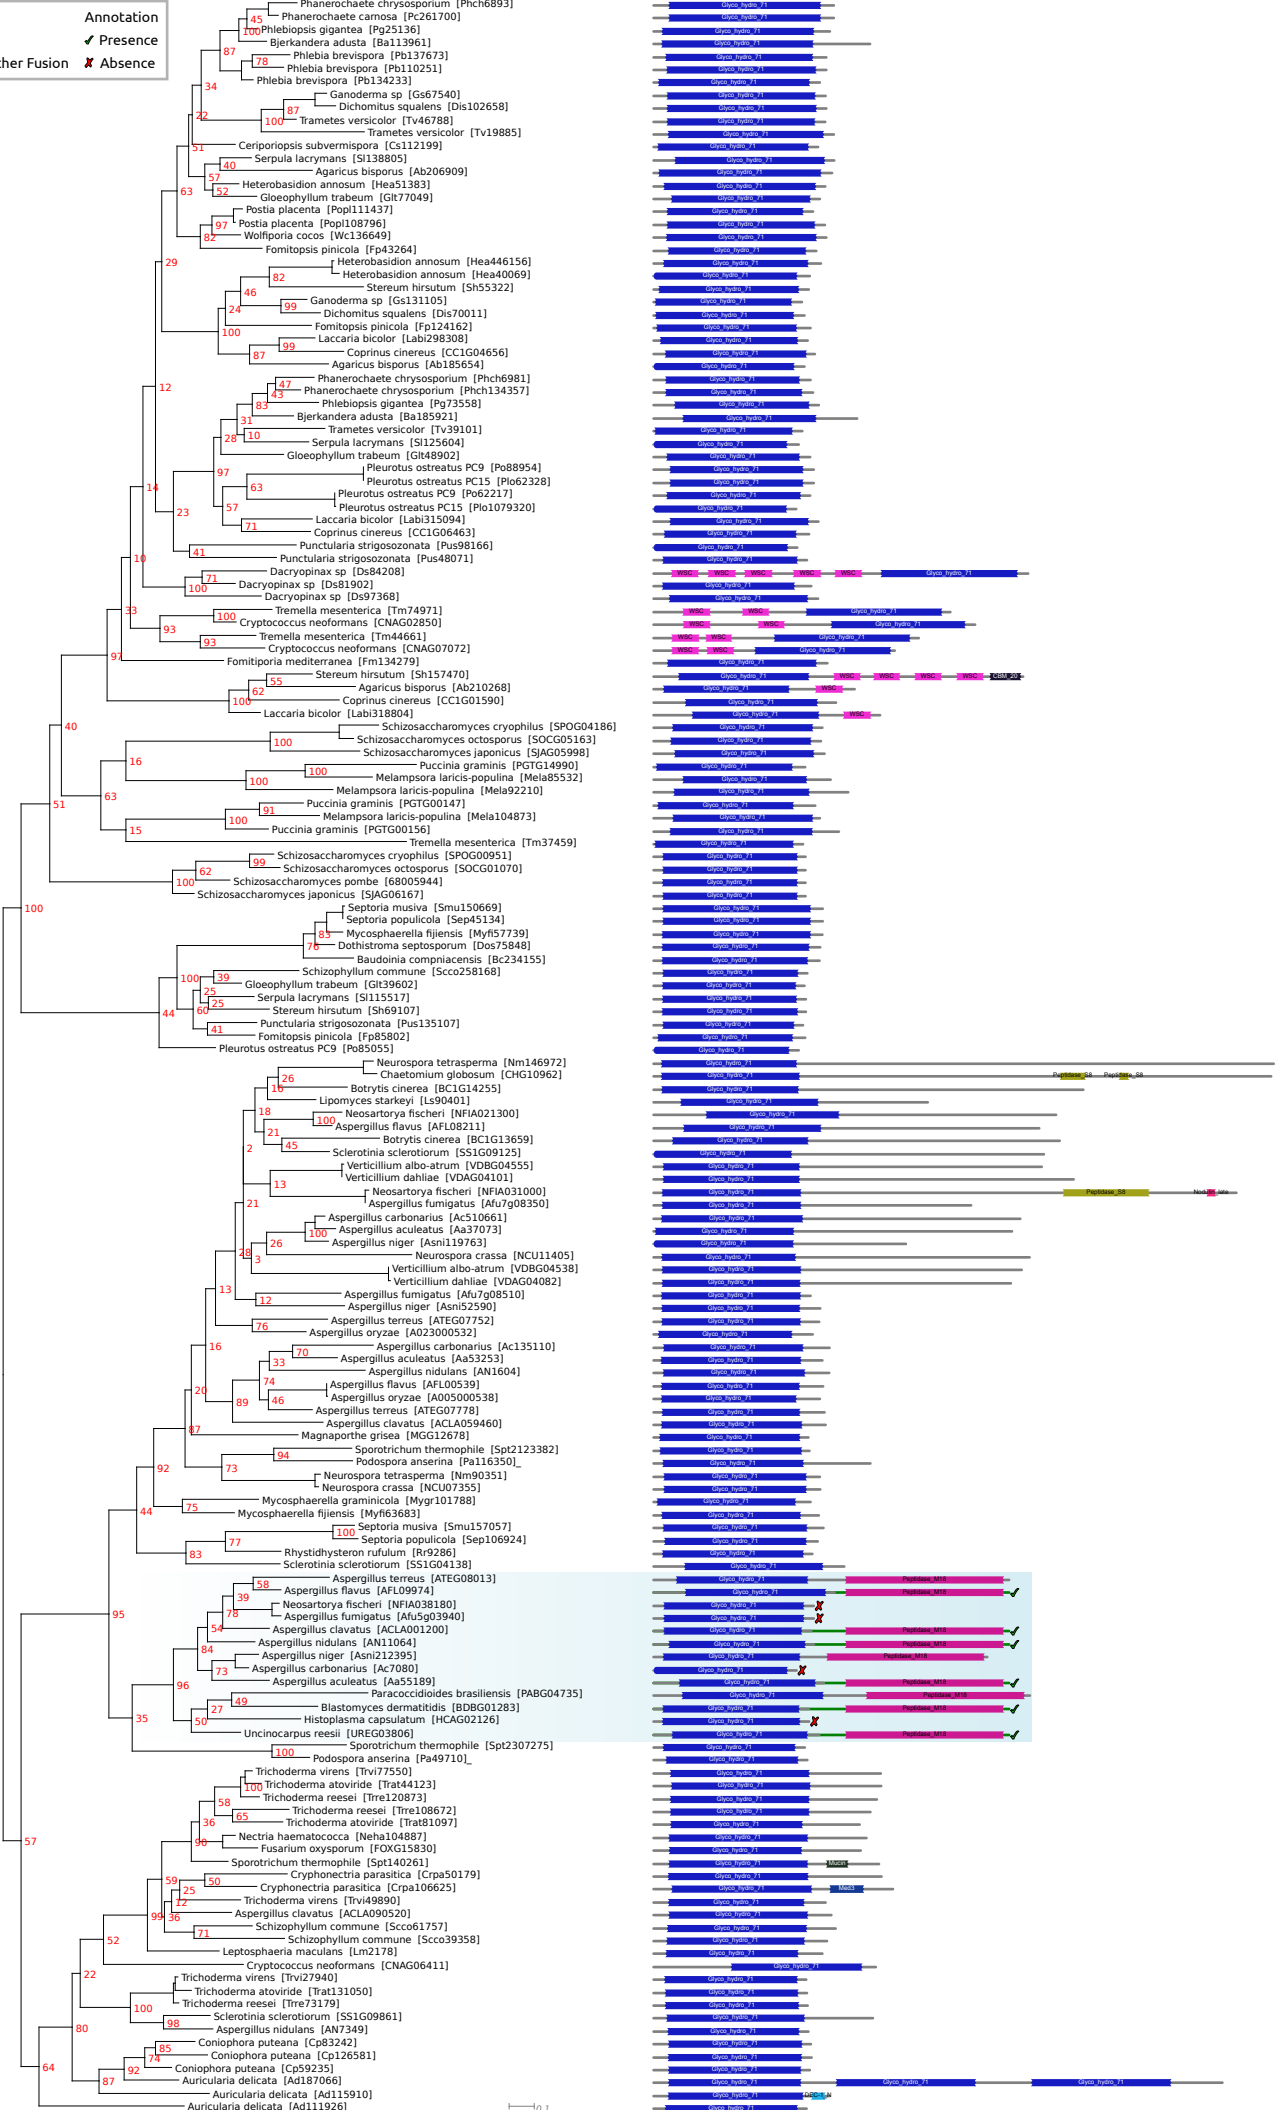

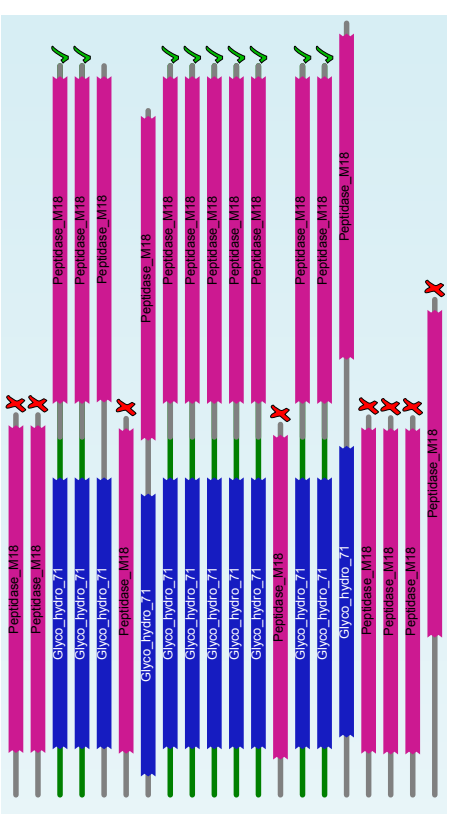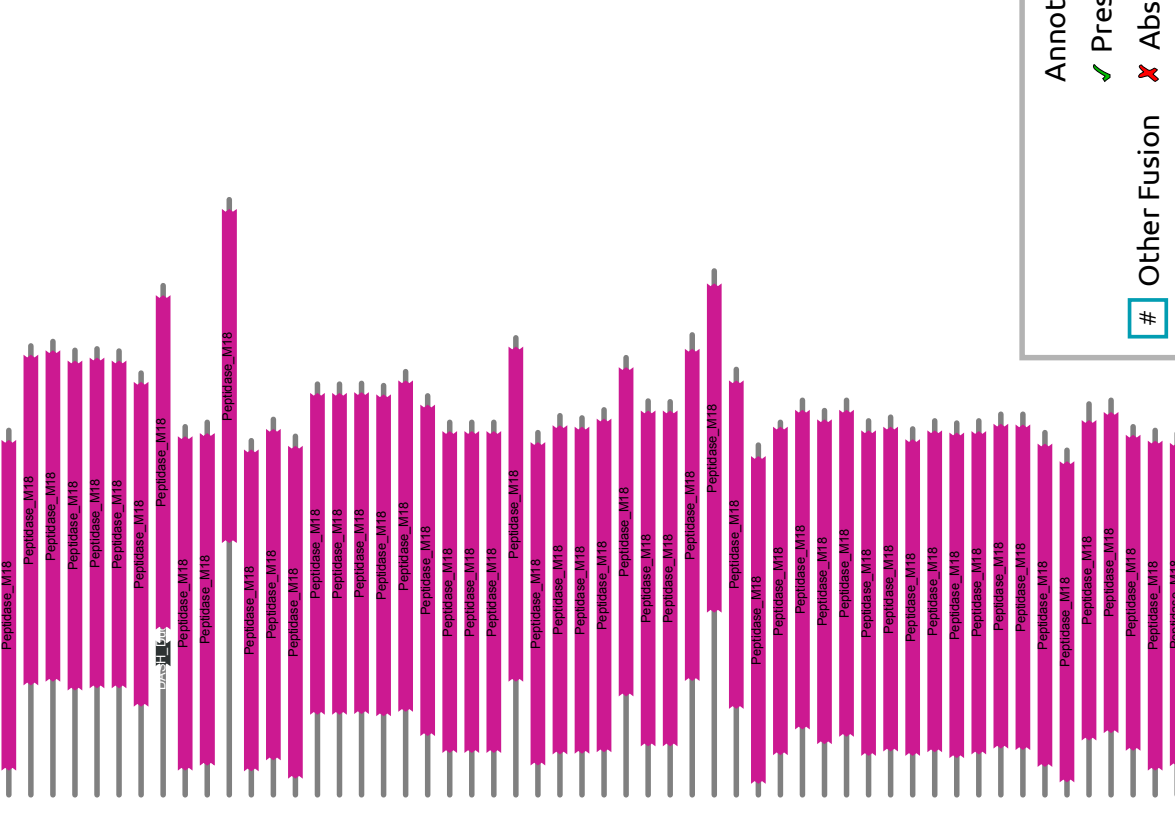

Annotation

✓ Presence

✗ Absence

# Other Fusion

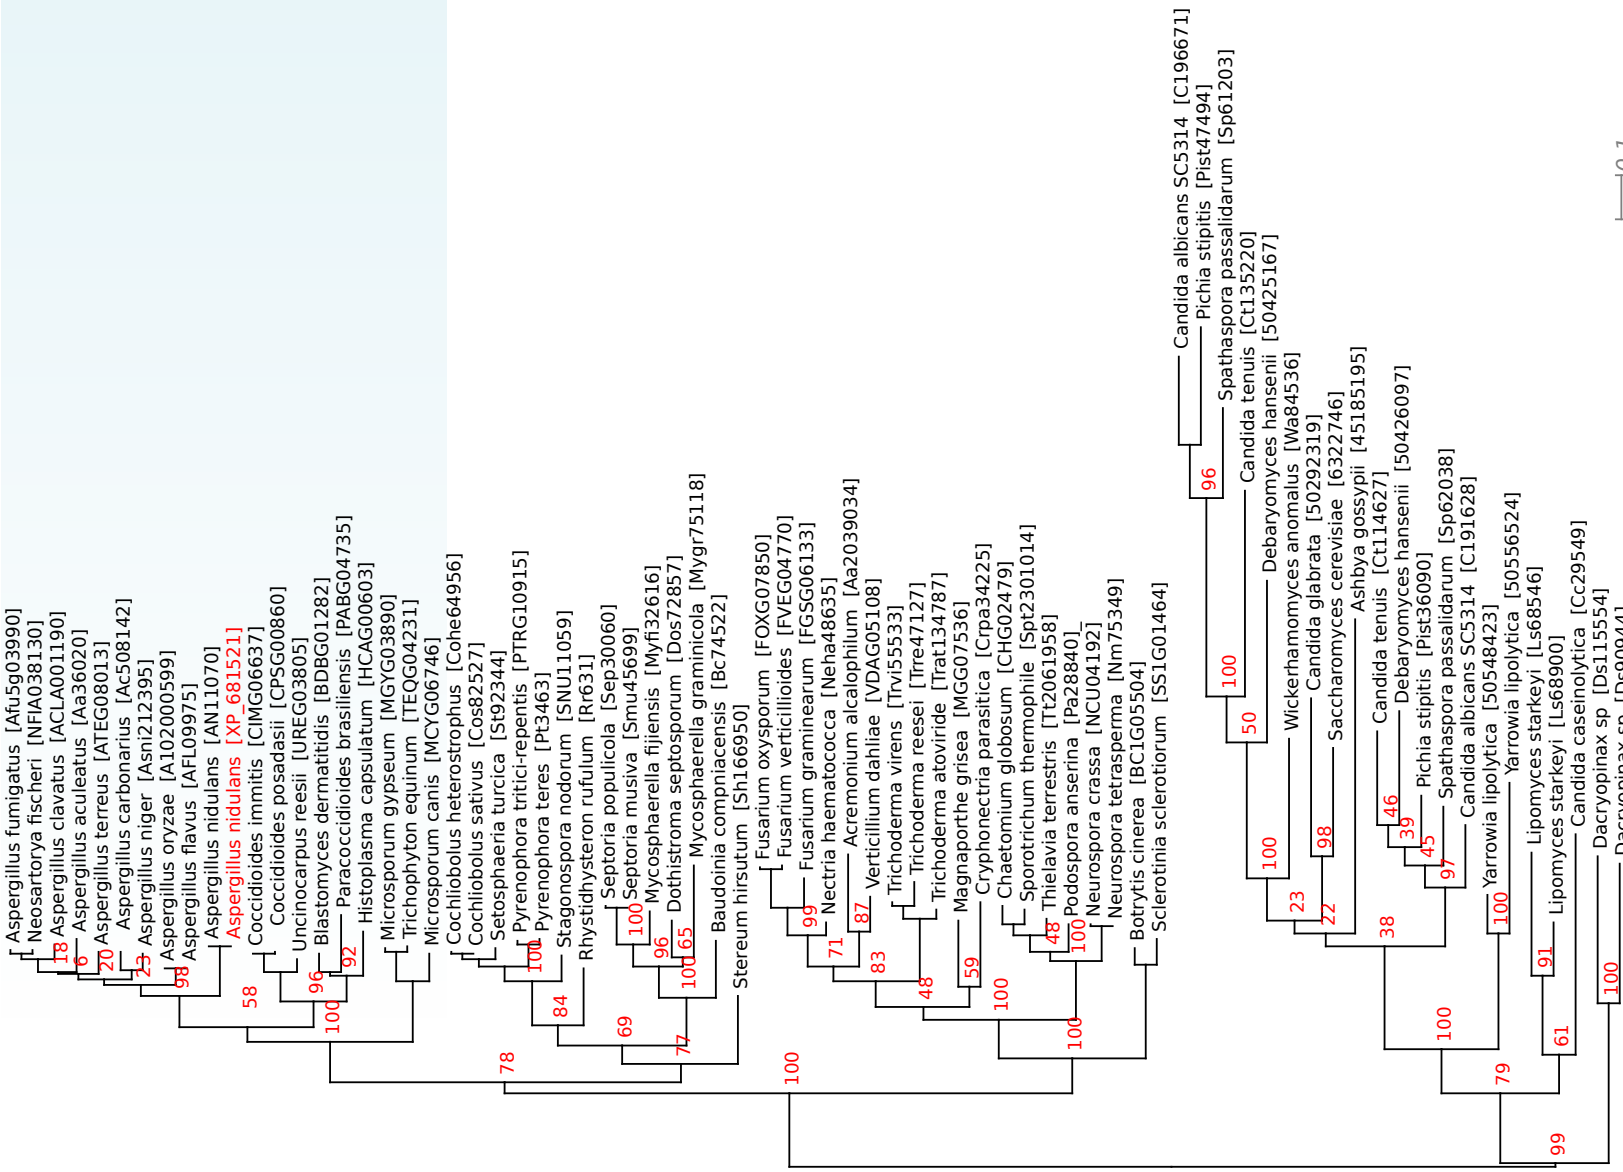



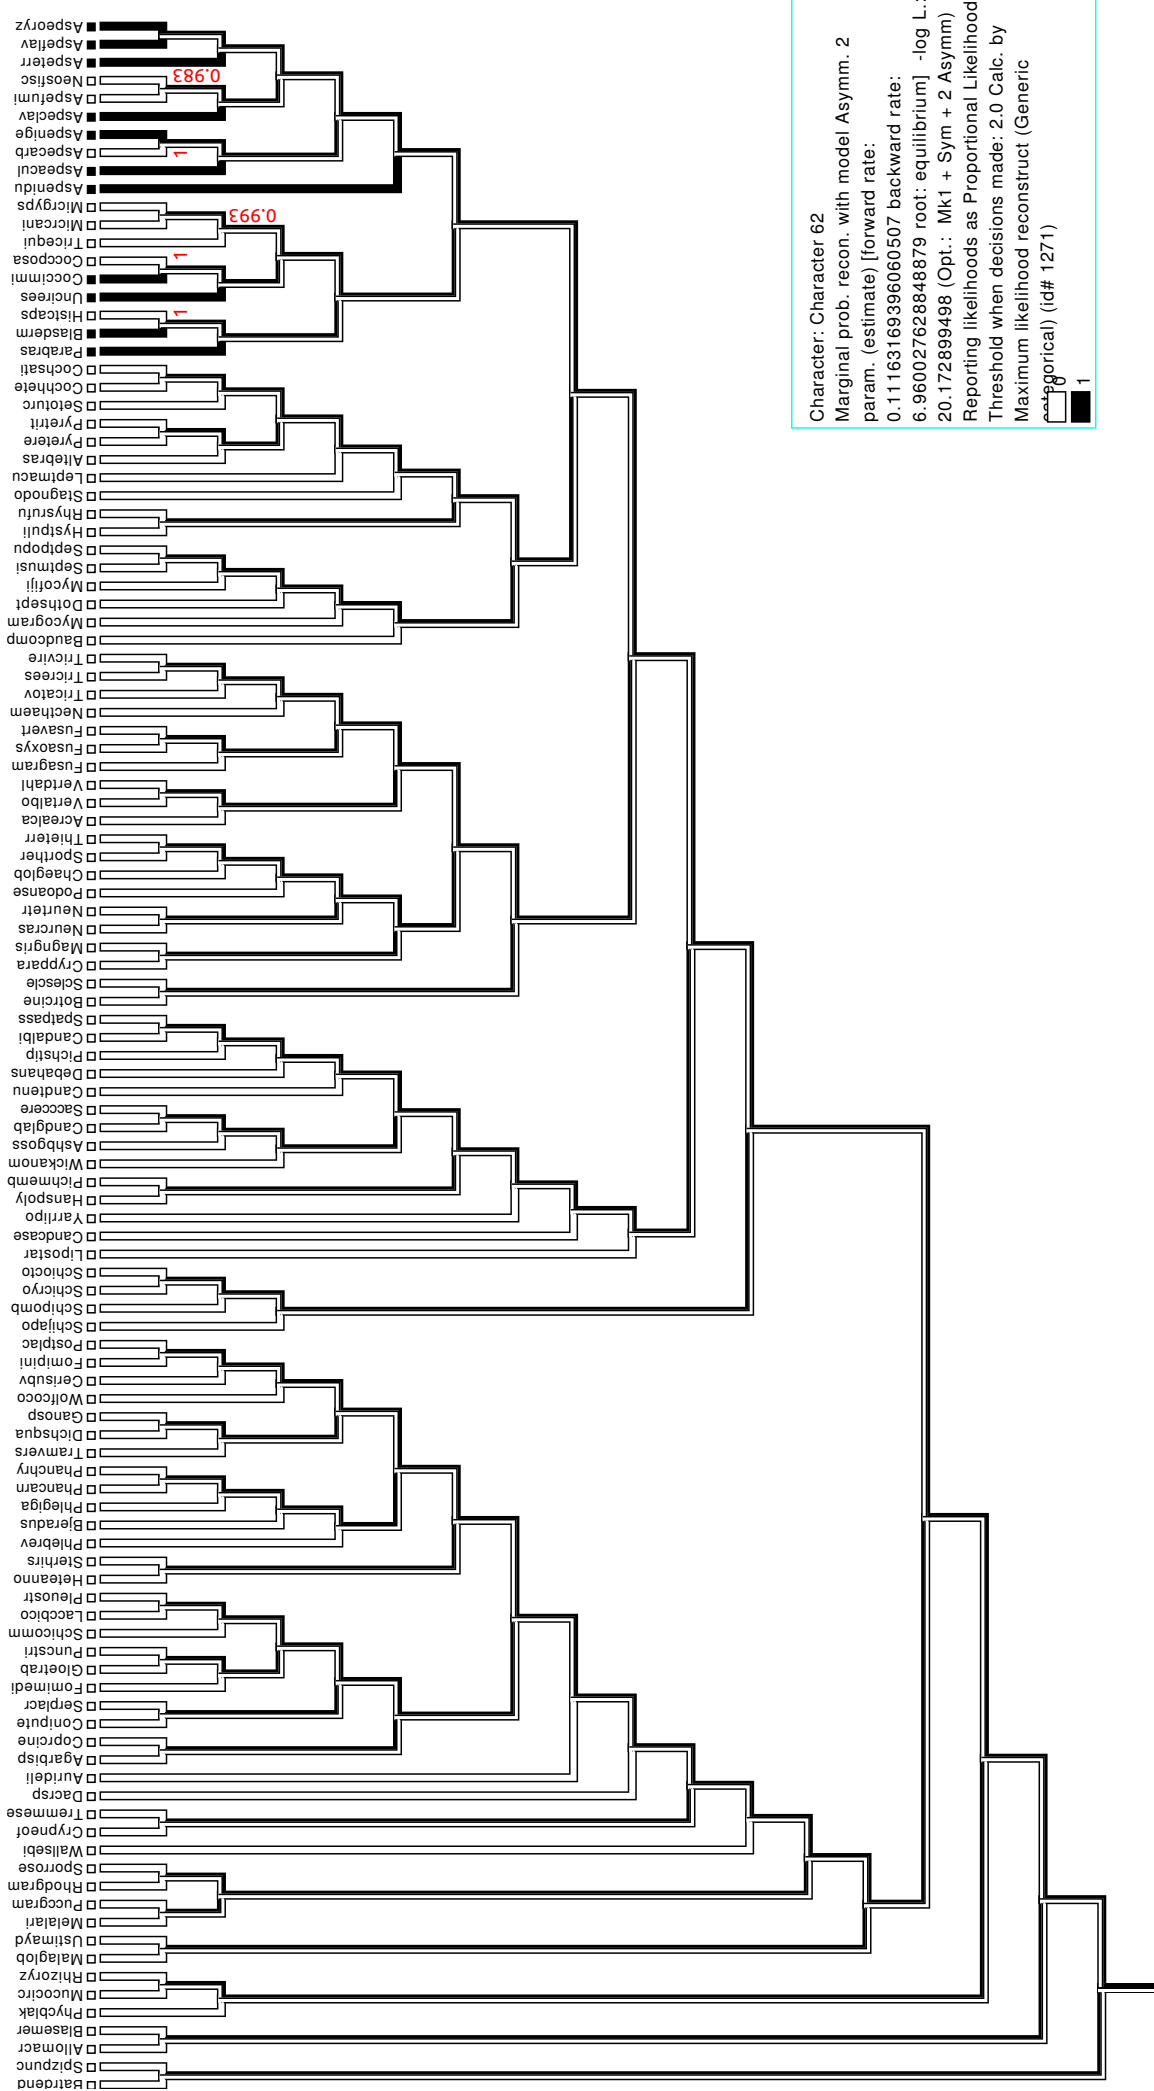

Character: Character 62  
 Marginal prob. recon. with model Asymm. 2  
 param. (estimate) [forward rate:  
 0.11163169396060507 backward rate:  
 6.960027628848879 root: equilibrium] -log L.:  
 20.172899498 (Opt.: Mk1 + Sym + 2 Asymm)  
 Reporting likelihoods as Proportional Likelihoods;  
 Threshold when decisions made: 2.0 Calc. by  
 Maximum likelihood reconstruct (Generic)

# Putative Fusion 62

September 27, 2012

## 1 Fasta Sequences

These are the unfused sequences identified by fdfBLAST belonging to the putative gene fusion in FASTA format. Accessions may be shortened, but belong to either the taxons individual genome project or NCBI's accession numbering.

```
>BDEG_08038_dom_1
MTDSPFNCIQRFELITRNLQEHLGGDKIKEVLATRD LKVVWGTA PTGKPHIGYFVPMTKV
ADFLKAGCEV TILFADMHAF LNDNQKAPWDL LKLR TSYEATIKSMLT SIGVPIEKLKFVV
GTSYQLSKEYSLDVYRLLSMTTEHA AKKAGAEVVKQVESPLLSGLVYPLLQALDEEYLG V
DAQFGGVDQRKIF TFAEKFLPQLGYAKRAHLMNVMVGGLSGSKMSSSDPDSKVDLLDEPD
SVVAKLKKAFCEE GNVDDNPILAFIKAVVFPVNSLTNPSYTF TIERPEKYGGNAEYSTYT
HLEEA FRELKLVHPGDLKSA AAKAINSLLEPIRANFHNSPEL KQMAIDAYPTPKAKVEAEI
>BDEG_08038_dom_2
SRVDIRVGKVIEVTAH PERDNLVYEKIDLGEATGPRTIVSGLAKYLTKEEFTGRLV LVVA
NLKASKFAGV LSEGMVLAASNADKSVV ELLPEPNEDSKI GEQVTFDGF TFS PDQTLNPKHK
VFEKCAVDFLTTEECVATYKNIPFKTSQGQVTVHSLRKATIS
```

## 2 Annotated Phylograms

All trees were generated from an initial run of Darren's Orchard pipeline against 139 taxa (Table S1), using the above corresponding un-fused sequences as BLAST seeds. The alignments were then checked for any missing taxa, manually masked and then ProtTest3 was run, please see the Methods section for detail. The final trees were generated by the following command:

```
phym1 -i alignment_file -d aa -b 100 -m model -c 8 -v invariant_sites -s BEST --quiet -a gamma
```

Styling and annotation was made possible by Dendroscope and Inkscape.

### 2.1 Important Notes

There is only one phylogeny shown here as the second domain is quite small and so the resulting alignment and phylogeny were mostly unresolved.

## 3 Mesquite Cladogram

This tree is the 68-gene concatenated phylogeny (Fig. 1), with the presence of a fusion (black), presence of a fission (white), and absent/undetermined (grey) status of gene fusion characters plotted on to it using a "1/0/-" nexus-style data matrix. We used the program 'Mesquite' to calculate proportional likelihoods based on either an "Mk1" or "Assym. 2 param model." (see Table S4) of character change across the fungal phylogeny (Fig. 1). This allowed for a proportional likelihood of the position of the fusion/fission to be calculated.

Annotation  
 ✓ Presence  
 ✗ Absence

# Other Fusion

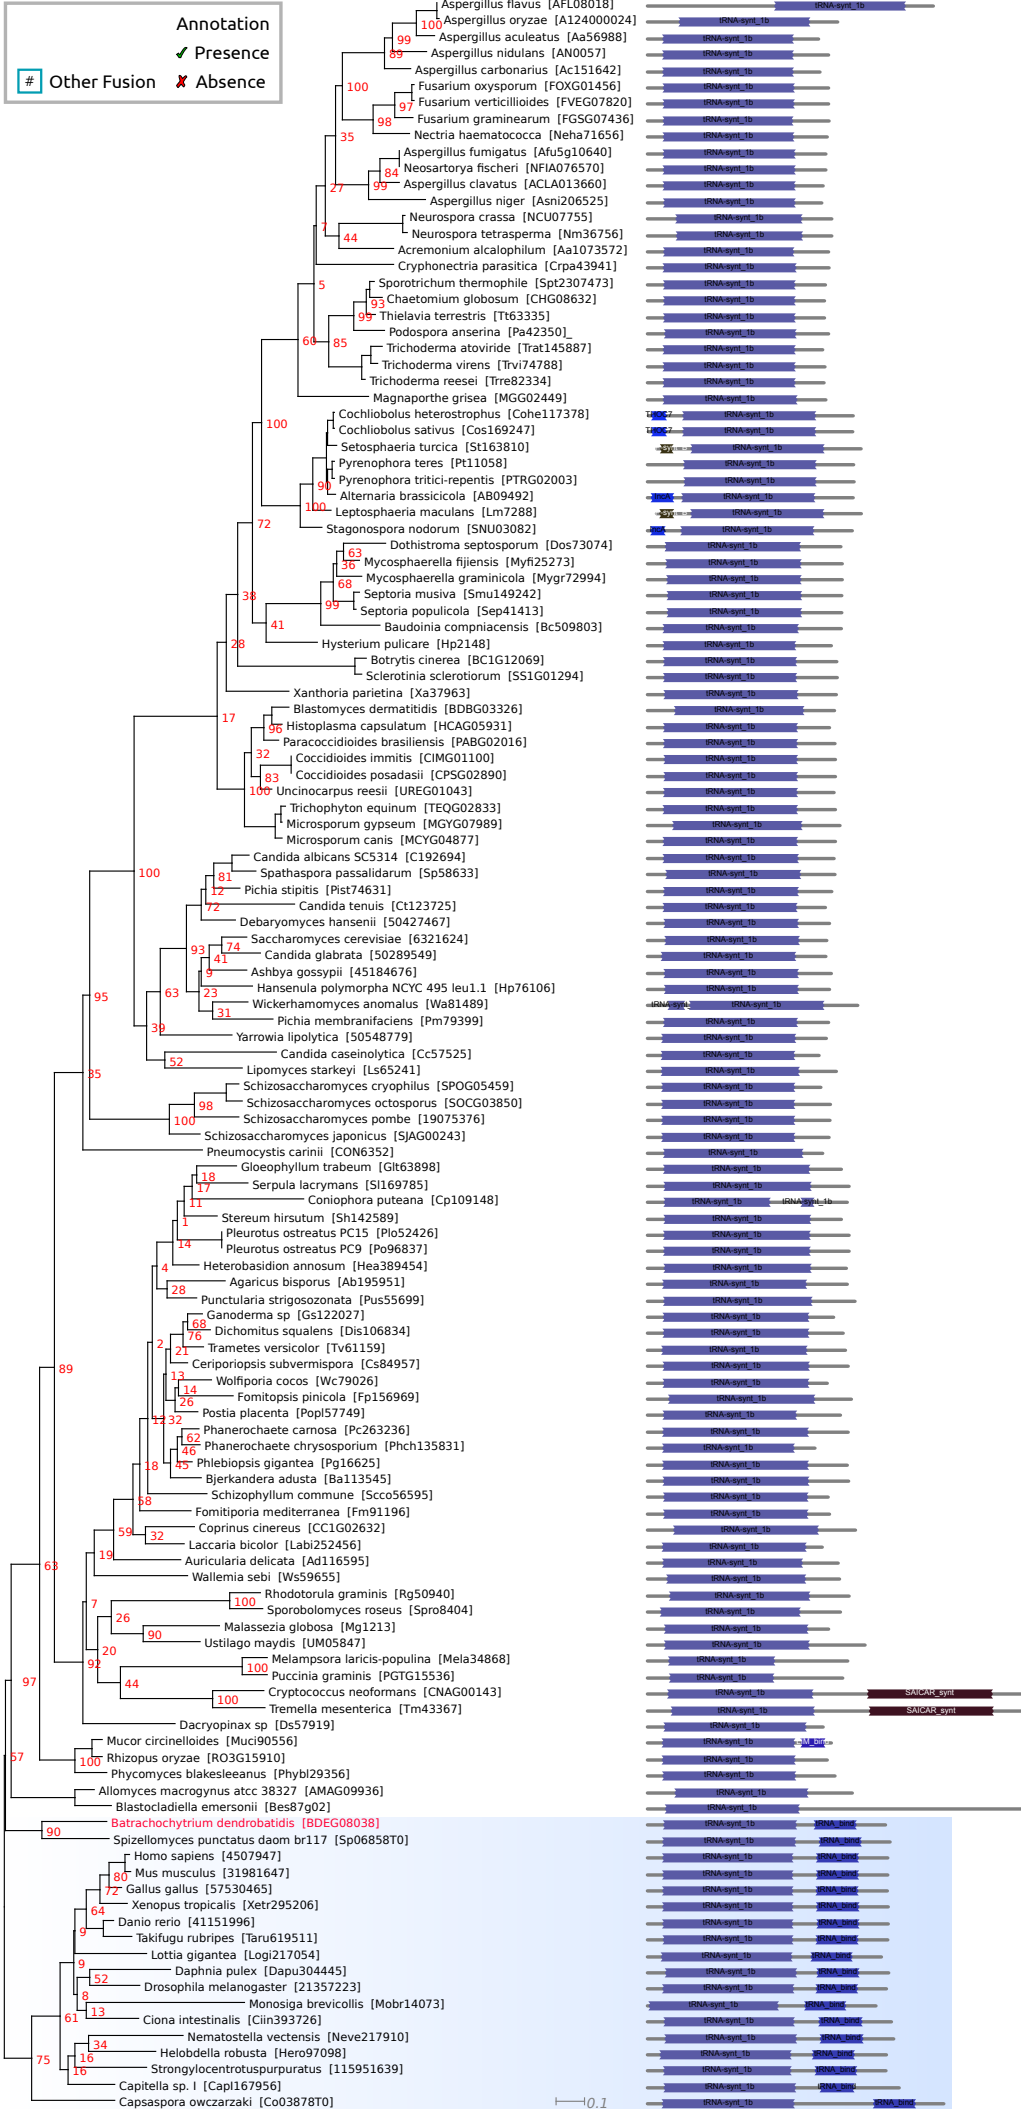

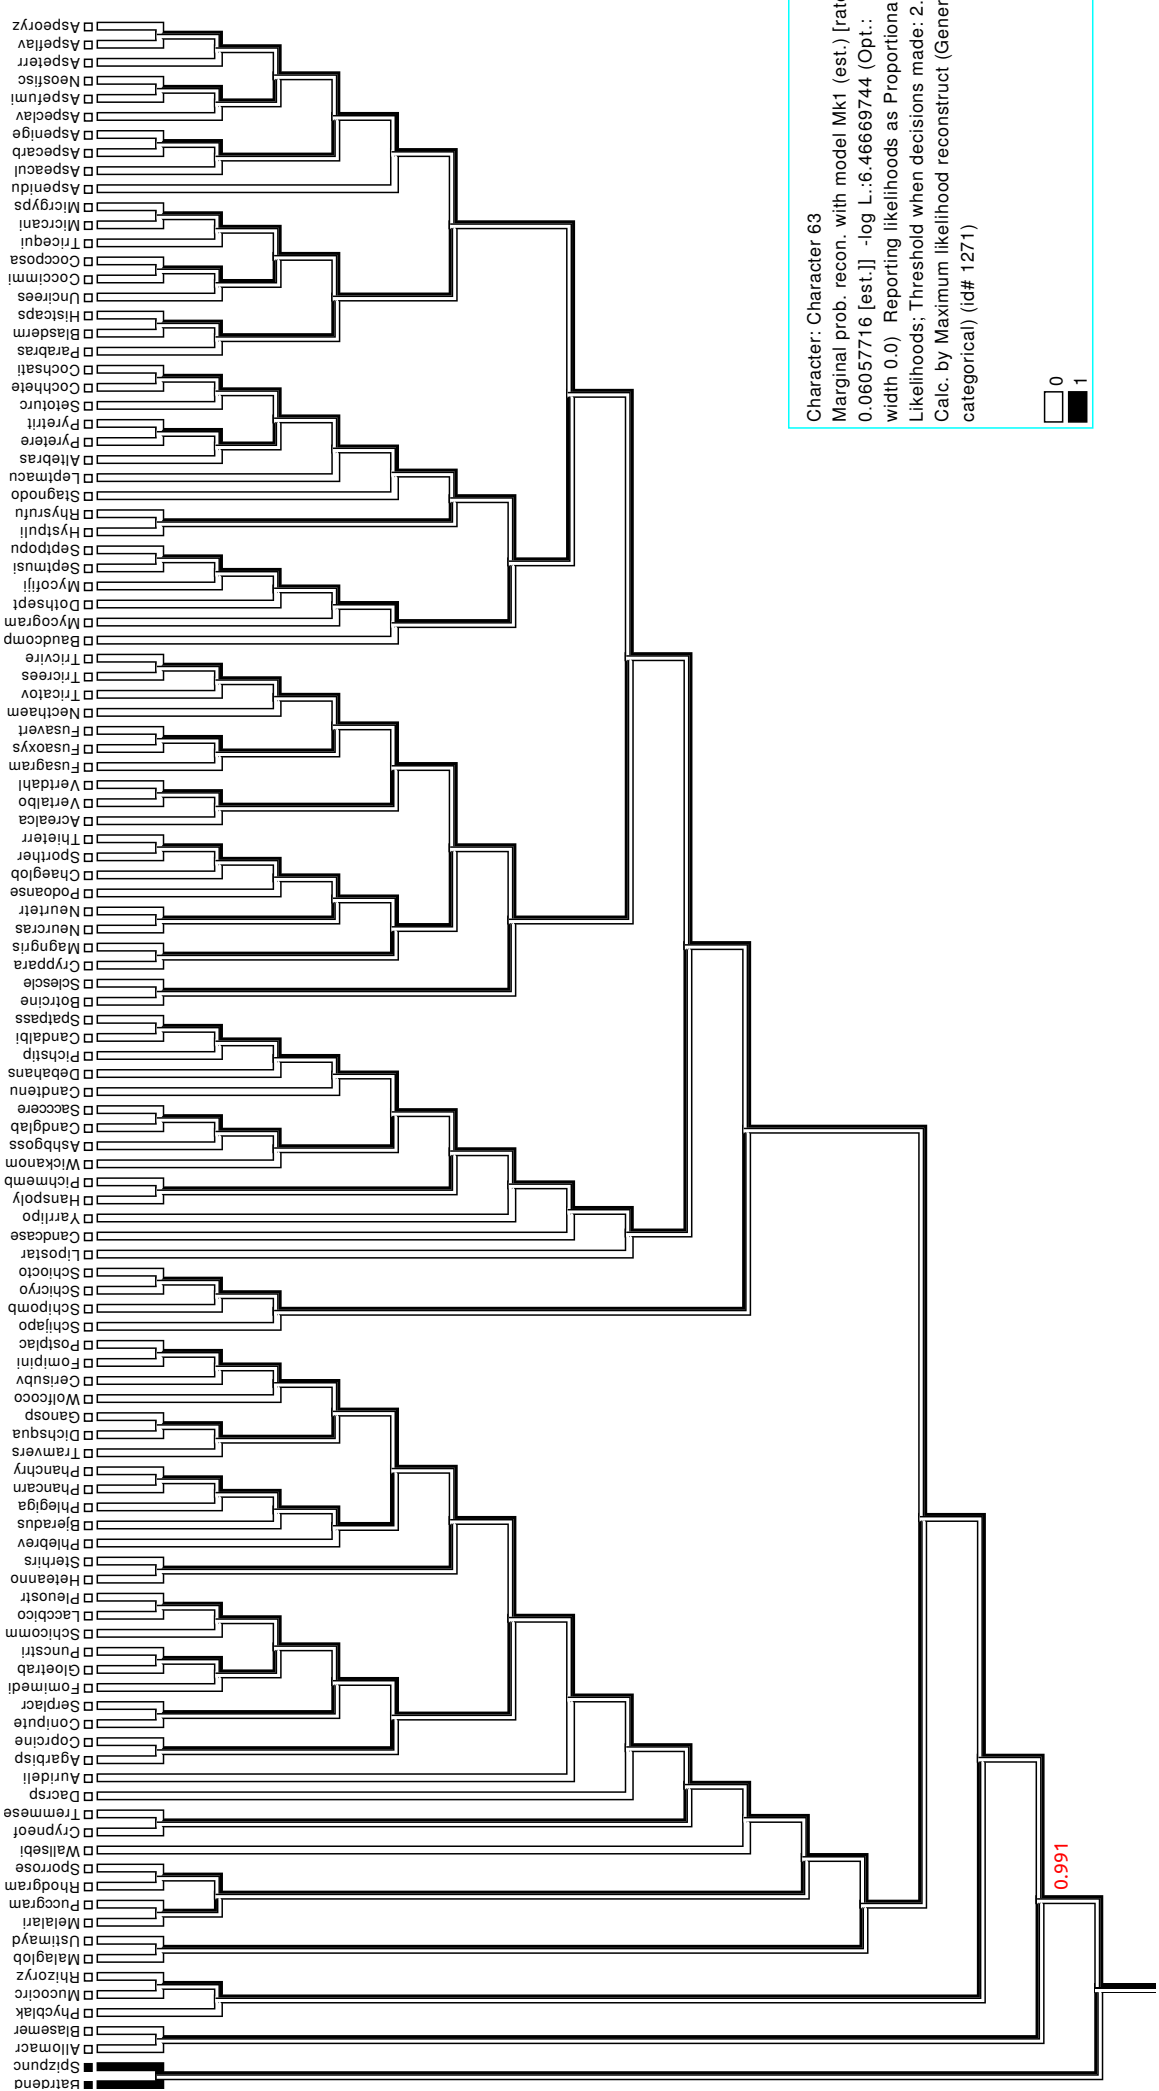

Character: Character 63  
 Marginal prob. recon. with model Mk1 (est.) [rate  
 0.06057716 [est.]] -log L.:6.46669744 (Opt.:  
 width 0.0) Reporting likelihoods as Proportional  
 Likelihoods; Threshold when decisions made: 2.0  
 Calc. by Maximum likelihood reconstruct (Generic  
 categorical) (idf: 1271)



0.991
